# Supplementary material for: Tempo and mode of gene expression evolution in the brain across primates
Source: eLife journal article supplement (doi:10.7554/elife.70276), 2024-01-26

## Cerebellum

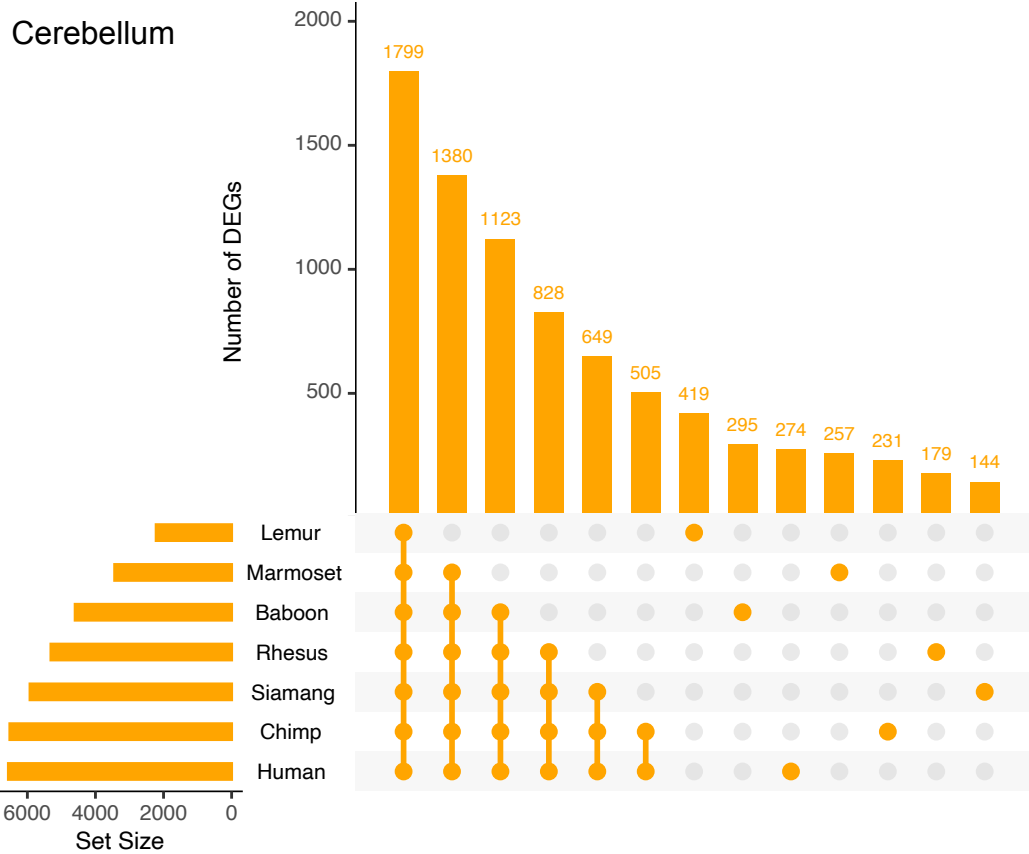

## PFC

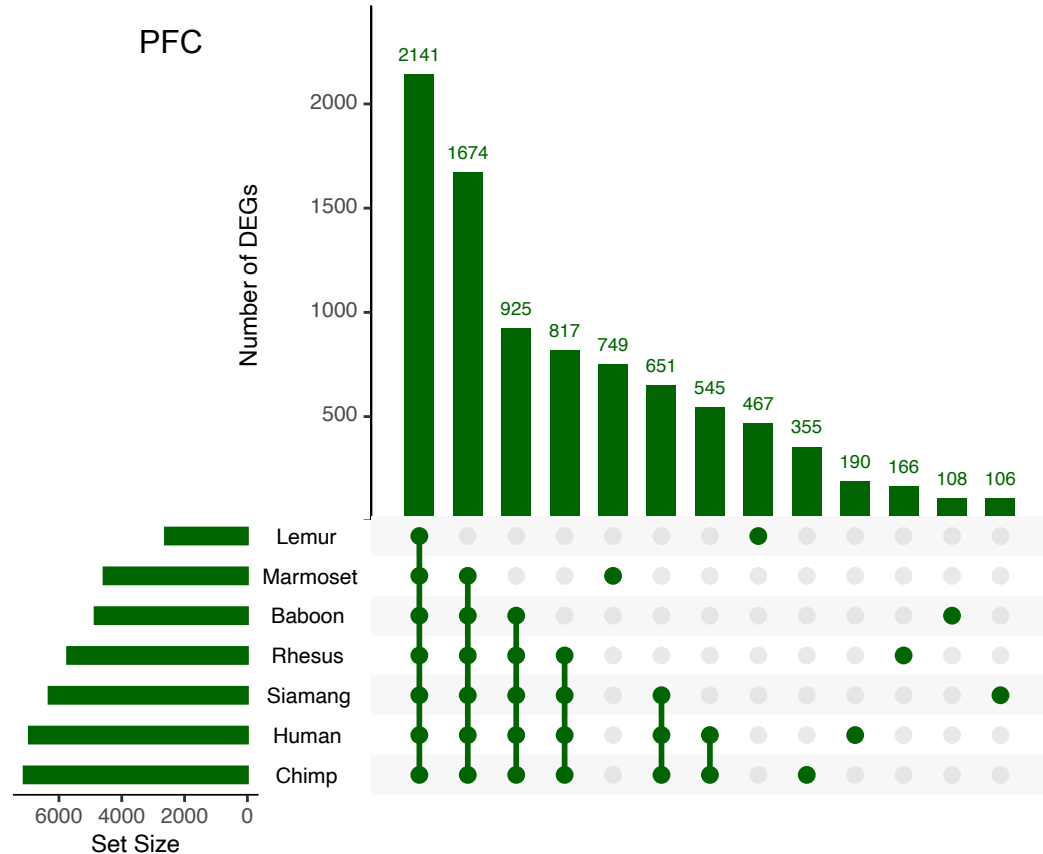

## Hippocampus

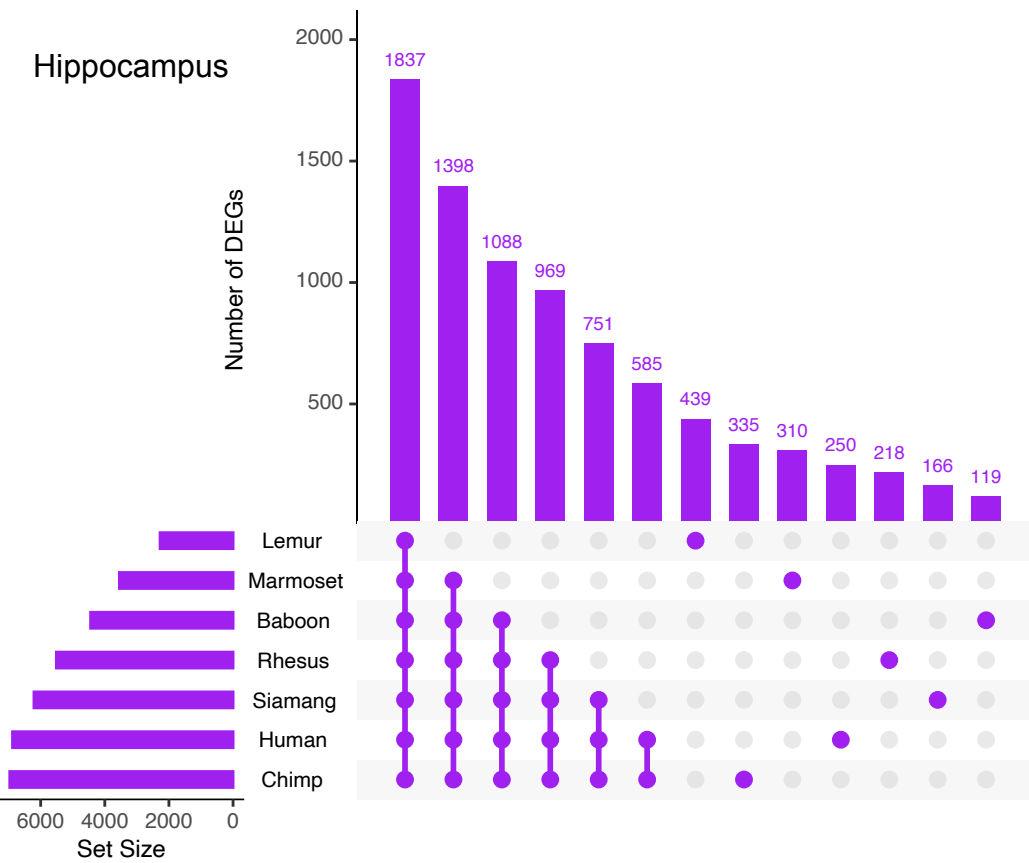

## V1

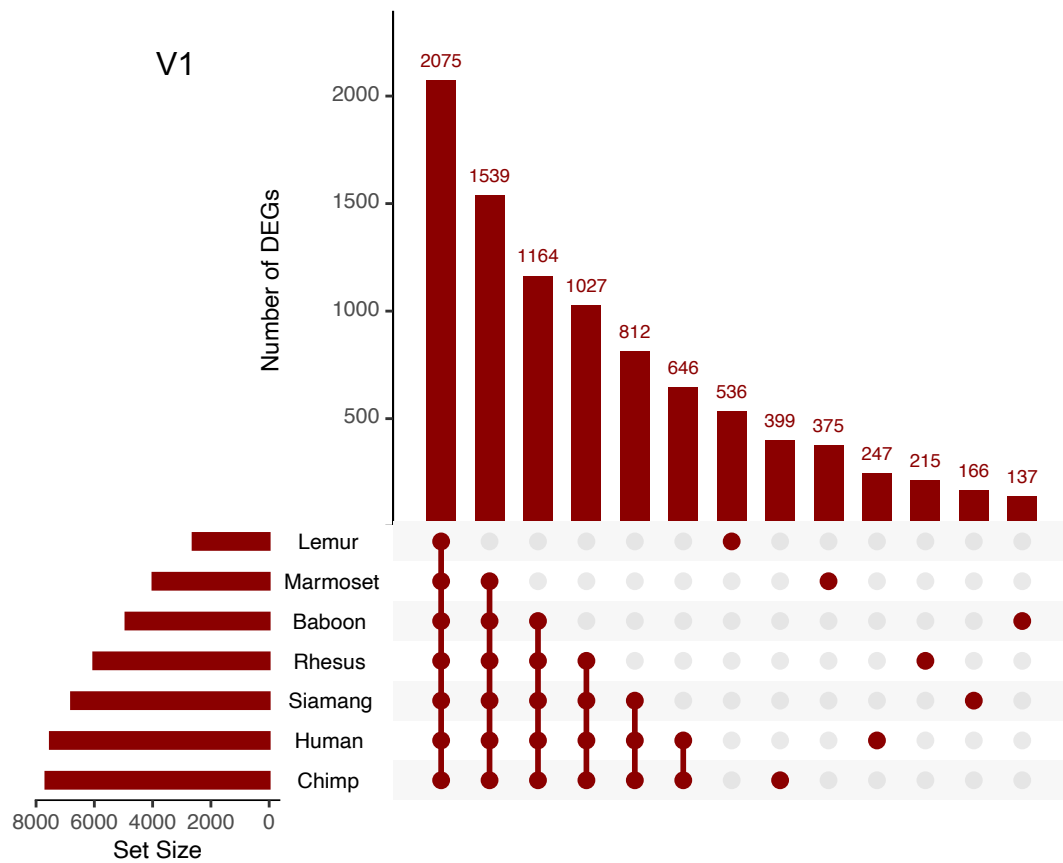

## Cerebellum

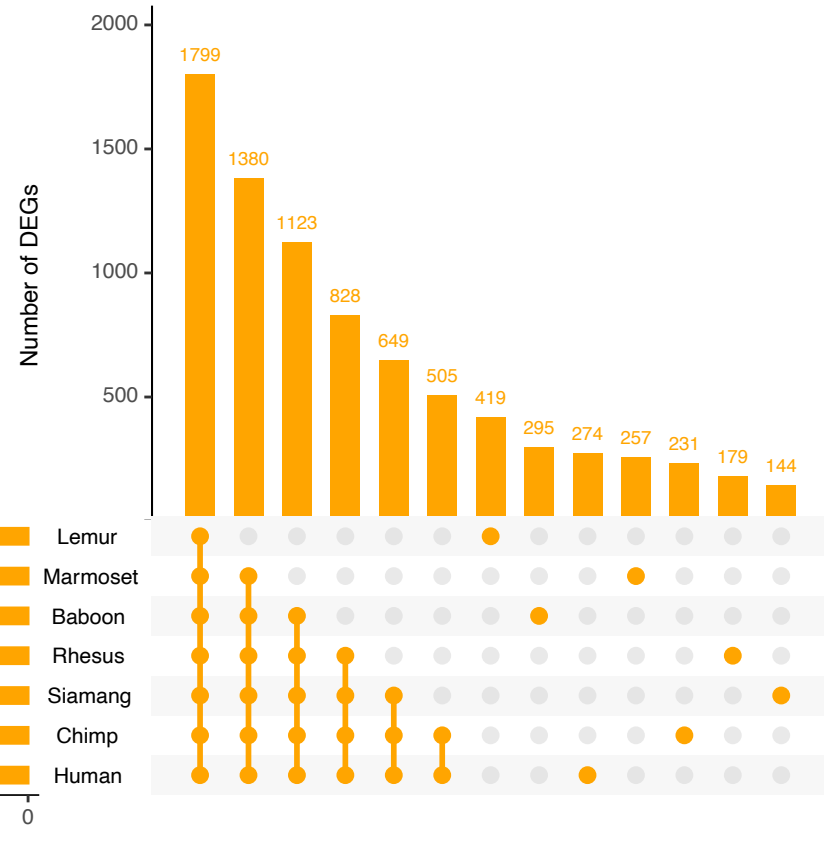

PFC

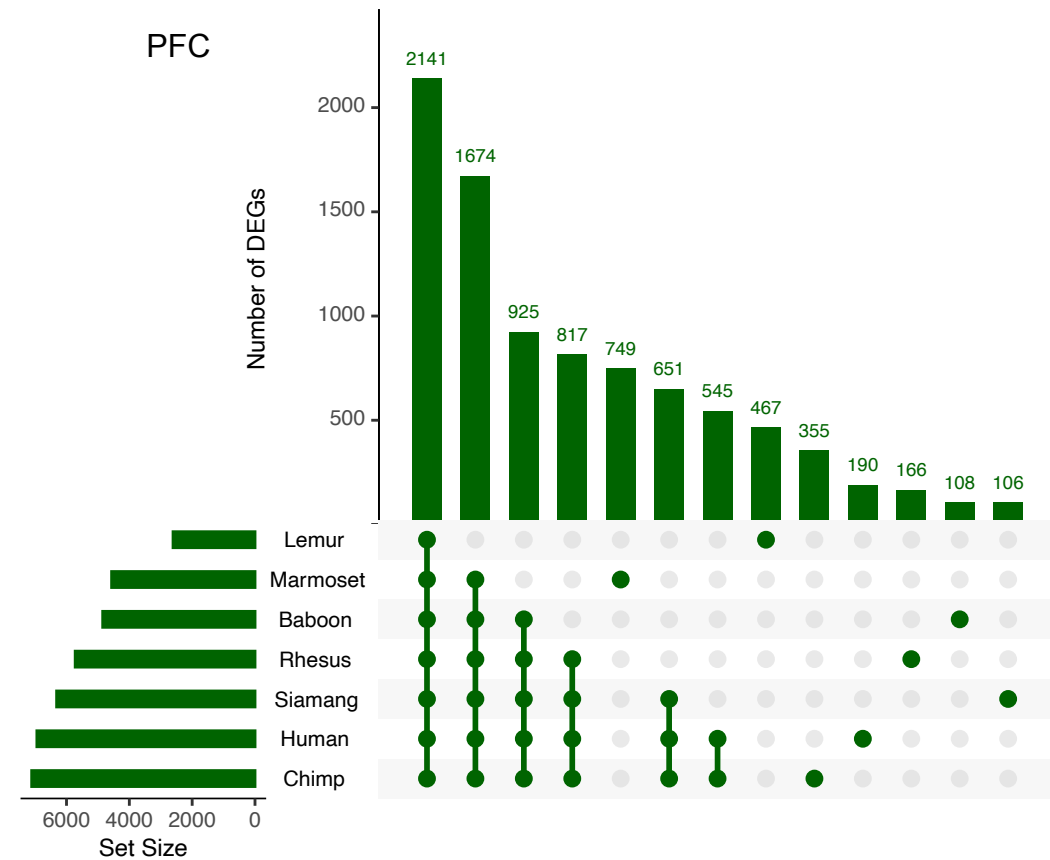

## Hippocampus

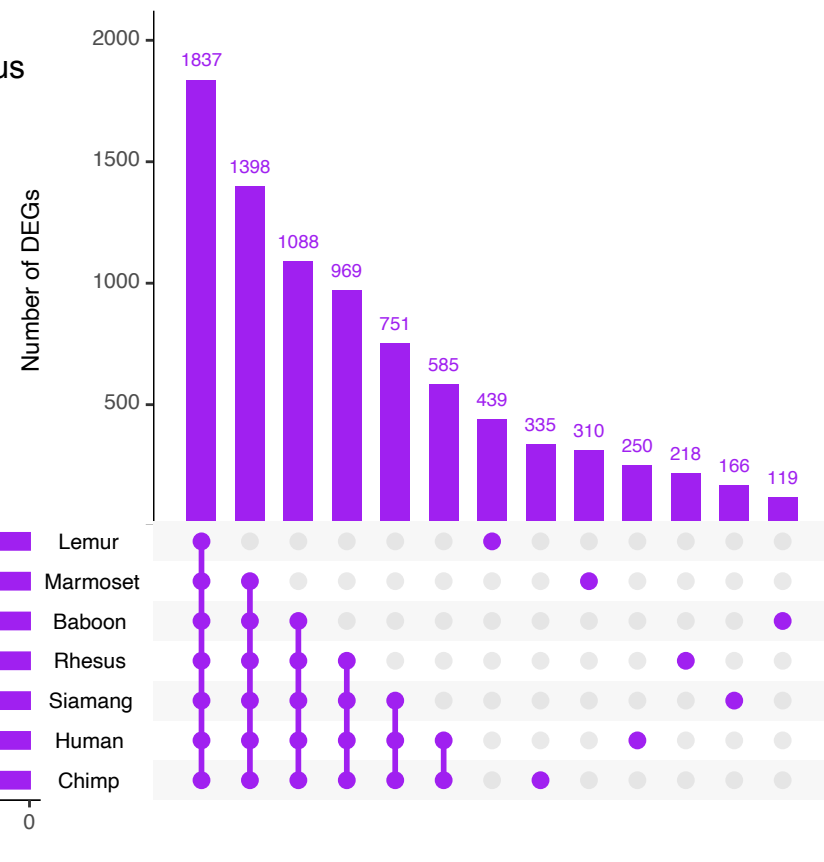

V1

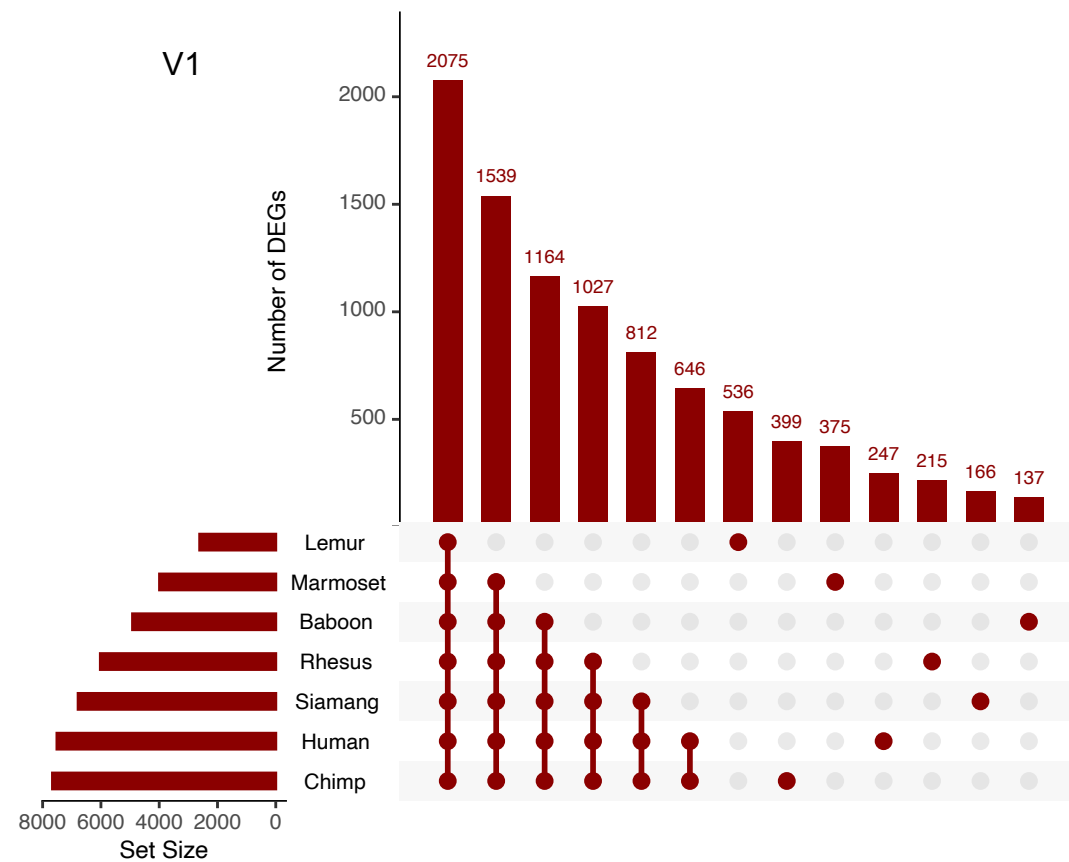

## Cerebellum

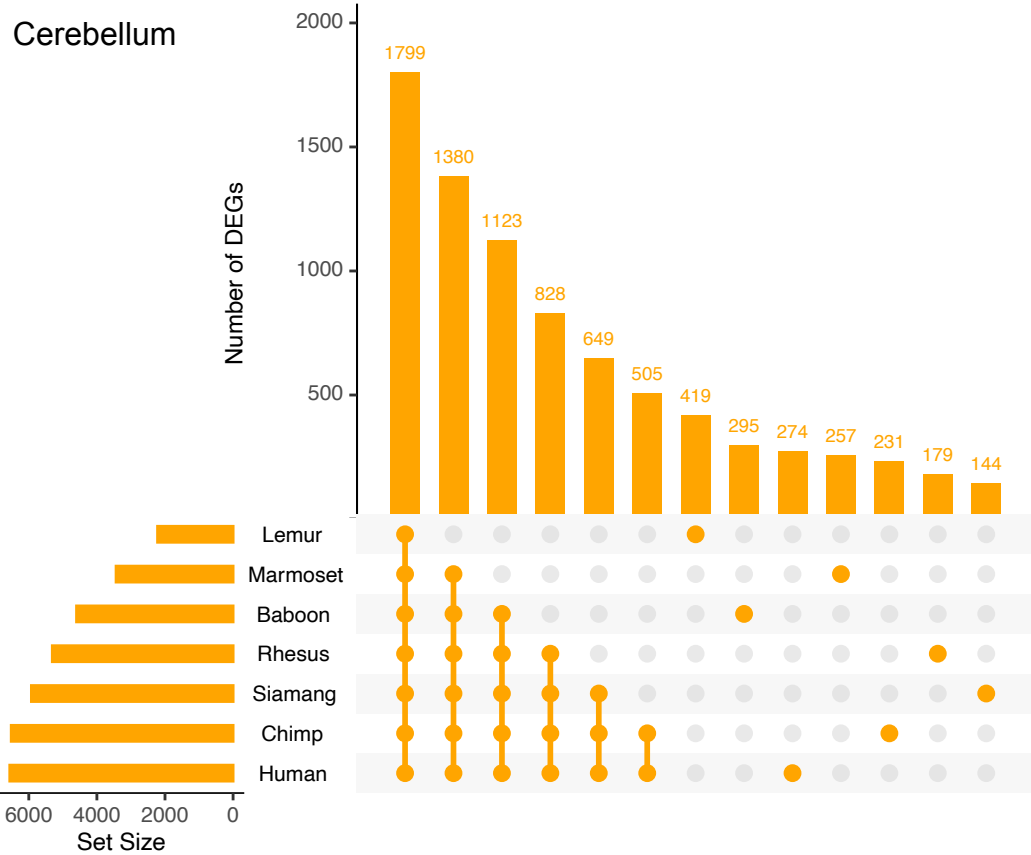

## PFC

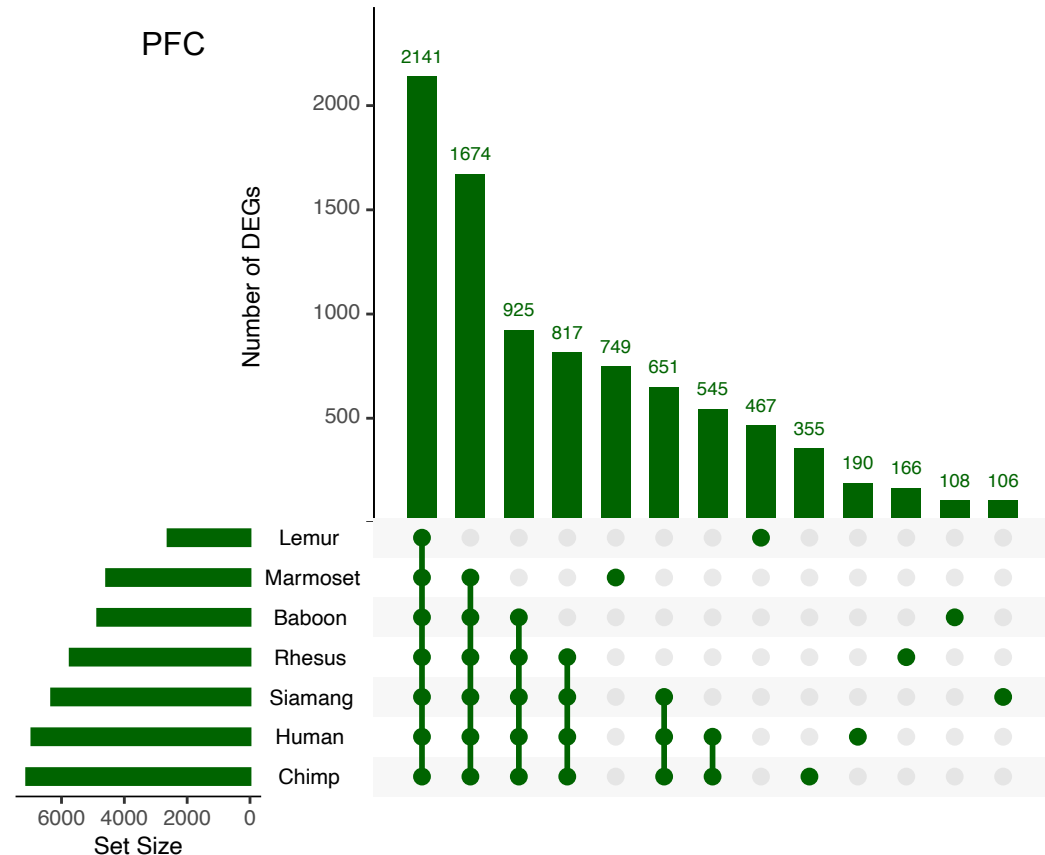

## Hippocampus

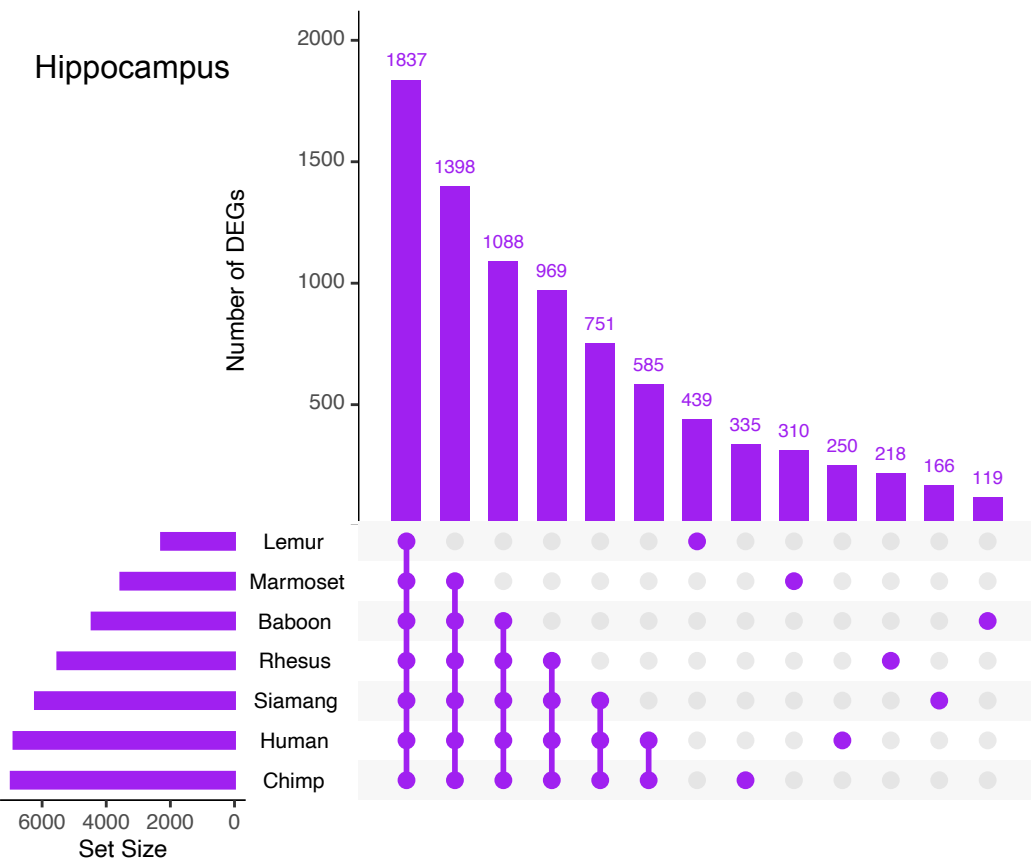

## V1

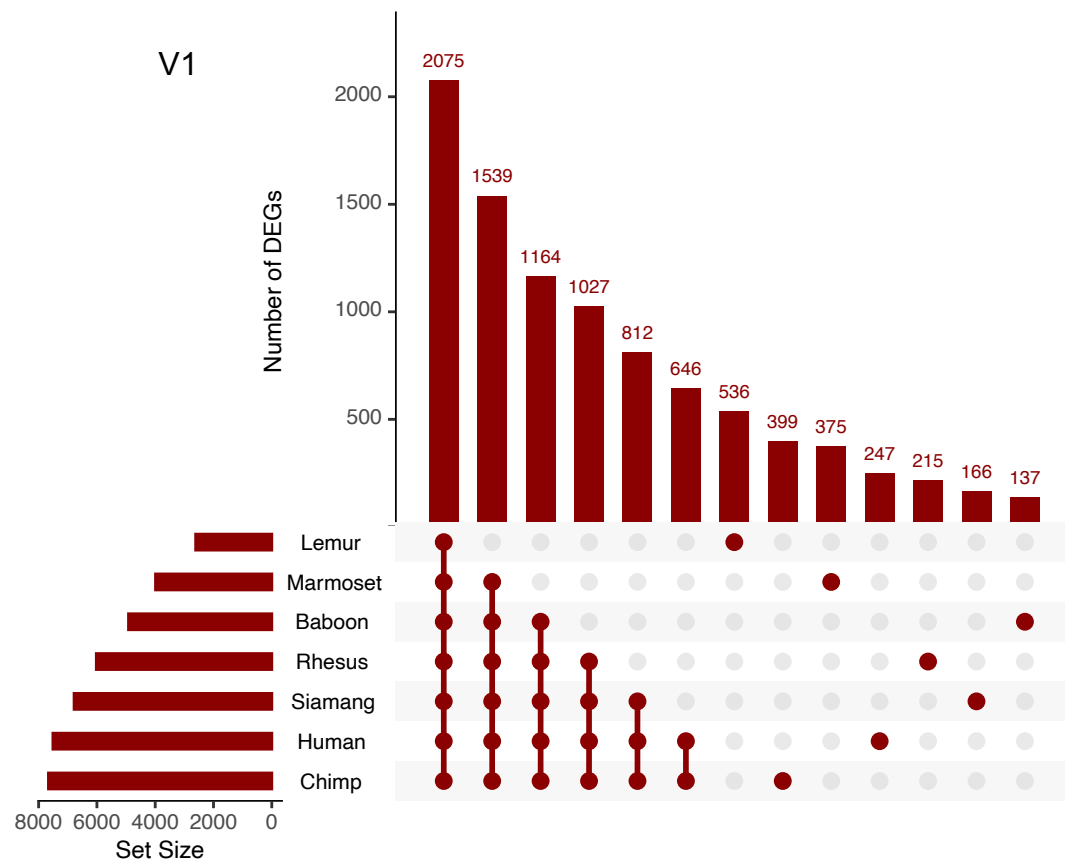

## Cerebellum



## PFC



## Hippocampus



## V1



Supplement: supp [file elife-70276-supp-v1.zip]
