# Supplementary material for: Tempo and mode of gene expression evolution in the brain across primates
Source: eLife. 2024 Jan 26;13:e70276. doi: 10.7554/eLife.70276 (PMC10876213; doi:10.7554/eLife.70276)
Supplement: Supplementary file 1. [file elife-70276-supp1.xlsx]

## Sheet: Table S1 Samples and Species
Species	Common name	Individual	Facility	Sex	Age (yrs)	Hemisphere
Ateles fusciceps	Spider monkey	1	1	M	40	Right
Ateles fusciceps	Spider monkey	2	1	F	36	Right
Callithrix jacchus	Marmoset	1	2	M	8.2	Right
Callithrix jacchus	Marmoset	2	2	M	8.2	Right
Callithrix jacchus	Marmoset	3	2	M	2	Right
Erythrocebus patas	Patas monkey	1	3	M	11	Right
Erythrocebus patas	Patas monkey	2	3	M	7	Right
Erythrocebus patas	Patas monkey	3	3	M	6	Right
Eulemur macaco flavifrons	Black lemur	1	1	F	18.1	Right
Gorilla gorilla gorilla	Gorilla	1	4	F	46	Left
Lemur catta	Ring-tailed lemur	1	1	F	15	Right
Lemur catta	Ring-tailed lemur	2	1	F	24	Right
Loris tardigradus	Slender loris	1	1	M	18.3	Right
Macaca mulatta	Rhesus macaque	1	2	M	9	Right
Macaca mulatta	Rhesus macaque	2	5	M	9.8	Right
Macaca mulatta	Rhesus macaque	3	5	F	8.6	Right
Macaca nemestrinaa	Pig-tailed macaque	1	1	M	15.6	Left
Macaca nemestrina	Pig-tailed macaque	2	6	F	15.7	Left
Nycticebus coucangb	Slow loris	1	1	F	18.4	Right
Nycticebus coucang	Slow loris	2	1	M	20	Right
Nycticebus pygmaeusa	Pygmy slow loris	1	1	unknown	unknown	Right
Nycticebus pygmaeus	Pygmy slow loris	2	1	M	9.9	Right
Pan troglodytes	Chimpanzee	1	7	M	31	Right
Pan troglodytes	Chimpanzee	2	7	M	22	Right
Pan troglodytes	Chimpanzee	3	8	F	45.5	Right
Papio anubis	Olive baboon	1	1	F	6.5	Right
Papio anubis	Olive baboon	2	2	F	7.7	Right
Papio anubis	Olive baboon	3	2	M	7	Right
Pithecia pithecia	Saki	1	1	F	10	Right
Saimiri sciureus	Squirrel monkey	1	1	F	30.6	Right
Symphalangus syndactylus	Siamang	1	1	F	17.5	Right
Symphalangus syndactylus	Siamang	2	9	F	46	Right
Homo sapiens	Human	1	10	F	34.3	Left
Homo sapiens	Human	2	10	F	48.4	Left
Homo sapiens	Human	3	10	F	46.4	Left
Pongo pygmaeus	Orangutan	1	11	unknown	unknown	Left
a All regions sampled but CBL
b All regions sampled but PFC
1 Cleveland Metroparks Zoo (Cleveland, OH)
2 Texas Biomedical Research Institute (San Antonio, TX)
3 Bioqual (Rockville, MD)
4 Busch Gardens Tampa (Tampa, FL)
5 California National Primate Research Center (University of California, Davis, Davis, CA)
6 Washington National Primate Research Center (University of Washington, Seattle, WA)
7 Alamogordo Primate Facility (Holloman Air Force Base, Alamogordo, NM)
8 MD Anderson Center (University of Texas, Houston, TX)
9 Tulsa Zoo (Tulsa, OK)
10 National Institute of Child Health and Human Development (University of Maryland, Baltimore, MD)
11 Yerkes National Primate Research Center (Atlanta, GA)
