# Supplementary material for: Tempo and mode of gene expression evolution in the brain across primates
Source: eLife. 2024 Jan 26;13:e70276. doi: 10.7554/eLife.70276 (PMC10876213; doi:10.7554/eLife.70276)
Supplement: Supplementary file 6. [file elife-70276-supp6.xlsx]

## Sheet: Cover
Table S6: g:profiler_enrichments (g:GOSt).
Enrichments performed on an ordered query of DE genes where q < 0.05 (note, this is not ranked on higher or lower expression, just absolute change).
Species comparisons are 1. Human-Chimpanzee (HvC), Human-Siamang (HvS), Human-Rhesus Macaque (HvR), Human-Baboon (HvB), Human-Marmoset (HvM), and Human-Lemur (HvL).
Clade comparisons are for Hominini and all other Hominoids (HCvApes) and Hominoid-Strepsirrhini representatives (StrepvHom)
Region comparisons here are the third part of the label, for 1. Prefrontal Cortex (PFC), 2. Cerebellum (CBL), 3. Hippocampus (HIP), and Primary Visual Cortex (V1)
The final part of the label (Up) in some tabs refers to the directionality of the enrichment for relevant analyses.

## Sheet: HvC_PFC
source	term_name	term_id	adjusted_p_value	negative_log10_of_adjusted_p_value	term_size	query_size	intersection_size	effective_domain_size	intersections
GO:BP	regulation of cellular process	GO:0050794	1.93093e-13	12.7142	11130	398	290	21092	CACNB3,CNTNAP2,PTPN11,PRKAG2,DLD,PRKN,DCTN1,NDUFAF2,PTCH2,GRIA3,IGF1R,FER,LRP8,UBQLN1,SCN1A,CSNK2A1,SMAD3,PPP2R1B,DMD,ITGA7,TRPS1,RAB33A,ABHD2,GRM1,TRIOBP,SOX6,TENM1,CTNNB1,DIAPH1,DLC1,SOX2,NCOA3,INHA,SF1,RDX,ROBO2,KMT2D,ARRB1,SALL3,CKS1B,CDC25B,TIAL1,DST,CUX1,DNAJB2,HNRNPK,HSF2,DDX17,BICC1,XRCC5,FZD8,PRKG1,DAB2,RBPJ,HES5,STMP1,RBM5,RCAN2,SRA1,CACNG2,SMARCA2,SF3B4,GABRA4,SLIT3,NR1D1,KCNH5,ELP4,PO…
GO:BP	anatomical structure development	GO:0048856	4.92088e-13	12.308	5836	398	186	21092	CNTNAP2,C1GALT1,PTPN11,DLD,ANKH,PRKN,DCTN1,PTCH2,IGF1R,FER,LRP8,SMAD3,IMPDH2,PPP2R1B,PAPSS2,DMD,ITGA7,TRPS1,ABHD2,TRIOBP,SOX6,TENM1,CTNNB1,DIAPH1,DLC1,SOX2,NCOA3,TTLL5,INHA,NEBL,SF1,RDX,ROBO2,KMT2D,CDC25B,TIAL1,CUX1,DDX17,BICC1,XRCC5,FZD8,PRKG1,DAB2,AFF4,RBPJ,HES5,SRA1,SMARCA2,KLHL3,SLIT3,NR1D1,POGLUT1,PPP1R9B,TUBB2A,HDAC1,PREX2,COBL,L3MBTL3,MAPK7,AFF3,SIN3A,IMPACT,POR,BTBD7,APP,KIF2A,FBXO45,CELS…
GO:BP	biological regulation	GO:0065007	1.05025e-12	11.9787	13096	398	321	21092	CACNB3,CNTNAP2,PTPN11,PRKAG2,DLD,ANKH,PRKN,DCTN1,NDUFAF2,PTCH2,GRIA3,IGF1R,F8,FER,LRP8,UBQLN1,SCN1A,CSNK2A1,SMAD3,PPP2R1B,PAPSS2,DMD,ITGA7,TRPS1,RAB33A,ABHD2,GRM1,KCNK9,TRIOBP,SOX6,TENM1,CTNNB1,DIAPH1,DLC1,SOX2,NCOA3,INHA,SF1,RDX,FBXO33,ROBO2,KMT2D,ARRB1,SALL3,CKS1B,CDC25B,TIAL1,DST,CUX1,DNAJB2,HNRNPK,HSF2,DDX17,BICC1,XRCC5,FZD8,PRKG1,DAB2,AFF4,RBPJ,HES5,STMP1,RBM5,RCAN2,SRA1,CACNG2,SMARCA2,KLHL3…
GO:BP	regulation of primary metabolic process	GO:0080090	2.10304e-12	11.6772	5869	398	185	21092	PTPN11,PRKAG2,PRKN,IGF1R,FER,LRP8,UBQLN1,CSNK2A1,SMAD3,DMD,TRPS1,SOX6,TENM1,CTNNB1,DLC1,SOX2,NCOA3,INHA,SF1,RDX,FBXO33,KMT2D,ARRB1,SALL3,CKS1B,CDC25B,TIAL1,CUX1,DNAJB2,HNRNPK,HSF2,DDX17,XRCC5,FZD8,DAB2,RBPJ,HES5,RBM5,SRA1,SMARCA2,SF3B4,NR1D1,ELP4,PPP1R9B,AHCYL1,HDAC1,CLTC,LARP1B,ZNF772,L3MBTL3,MAPK7,AFF3,SIN3A,IMPACT,POR,RPL11,RPS4X,APP,ATAD2,ZNF507,CELSR2,SP9,NFIA,KLF9,ZBTB18,TFE3,COA3,SMARCC2,D…
GO:BP	regulation of nitrogen compound metabolic process	GO:0051171	3.10226e-12	11.5083	5706	398	181	21092	PTPN11,PRKAG2,PRKN,IGF1R,FER,LRP8,UBQLN1,CSNK2A1,SMAD3,DMD,TRPS1,SOX6,TENM1,CTNNB1,DLC1,SOX2,NCOA3,INHA,SF1,RDX,FBXO33,KMT2D,ARRB1,SALL3,CKS1B,CDC25B,TIAL1,CUX1,DNAJB2,HNRNPK,HSF2,DDX17,XRCC5,FZD8,DAB2,RBPJ,HES5,RBM5,SRA1,SMARCA2,SF3B4,NR1D1,ELP4,PPP1R9B,AHCYL1,HDAC1,CLTC,LARP1B,ZNF772,L3MBTL3,MAPK7,AFF3,SIN3A,IMPACT,POR,RPL11,RPS4X,APP,ATAD2,ZNF507,CELSR2,SP9,NFIA,KLF9,ZBTB18,TFE3,COA3,SMARCC2,D…
GO:BP	regulation of cellular metabolic process	GO:0031323	5.83585e-12	11.2339	5649	398	179	21092	PTPN11,PRKAG2,PRKN,IGF1R,FER,LRP8,UBQLN1,CSNK2A1,SMAD3,DMD,TRPS1,SOX6,TENM1,CTNNB1,DLC1,SOX2,NCOA3,INHA,SF1,KMT2D,ARRB1,SALL3,CKS1B,CDC25B,TIAL1,CUX1,DNAJB2,HNRNPK,HSF2,DDX17,XRCC5,FZD8,DAB2,RBPJ,HES5,RBM5,SRA1,SMARCA2,SF3B4,NR1D1,ELP4,PPP1R9B,AHCYL1,HDAC1,ATP6V0A1,LARP1B,ZNF772,L3MBTL3,MAPK7,AFF3,SIN3A,IMPACT,POR,RPL11,RPS4X,APP,ATAD2,ZNF507,CELSR2,SP9,NFIA,KLF9,ZBTB18,TFE3,COA3,SMARCC2,DPF2,INT…
GO:BP	developmental process	GO:0032502	9.57419e-12	11.0189	6424	398	195	21092	CNTNAP2,C1GALT1,PTPN11,DLD,ANKH,PRKN,DCTN1,PTCH2,IGF1R,FER,LRP8,SMAD3,IMPDH2,PPP2R1B,PAPSS2,DMD,ITGA7,TRPS1,ABHD2,TRIOBP,SOX6,TENM1,CTNNB1,DIAPH1,DLC1,SOX2,NCOA3,TTLL5,INHA,NEBL,SF1,RDX,ROBO2,KMT2D,CDC25B,TIAL1,CUX1,HSF2,DDX17,BICC1,XRCC5,FZD8,PRKG1,DAB2,AFF4,RBPJ,HES5,SRA1,SMARCA2,KLHL3,SLIT3,NR1D1,POGLUT1,PPP1R9B,TUBB2A,HDAC1,PREX2,CLTC,COBL,L3MBTL3,MAPK7,AFF3,SIN3A,IMPACT,POR,BTBD7,APP,RETREG1…
GO:BP	negative regulation of cellular process	GO:0048523	1.30225e-11	10.8853	4749	398	158	21092	PTPN11,PRKAG2,PRKN,NDUFAF2,PTCH2,IGF1R,FER,UBQLN1,CSNK2A1,SMAD3,DMD,TRPS1,ABHD2,TRIOBP,SOX6,TENM1,CTNNB1,DIAPH1,DLC1,SOX2,INHA,SF1,RDX,ROBO2,ARRB1,TIAL1,CUX1,DNAJB2,HNRNPK,BICC1,XRCC5,PRKG1,DAB2,RBPJ,HES5,RBM5,SRA1,SMARCA2,SLIT3,NR1D1,PPP1R9B,PTRH2,HDAC1,CLTC,GRIA1,ERLEC1,L3MBTL3,MAPK7,SIN3A,IMPACT,POR,RPL11,APP,RETREG1,KLF9,ZBTB18,SMARCC2,DPF2,ID4,ATP2B4,CCND2,CTSC,DUSP6,KDR,PHIP,STXBP1,SUMO1,PL…
GO:BP	regulation of biological process	GO:0050789	1.59602e-11	10.797	12361	398	306	21092	CACNB3,CNTNAP2,PTPN11,PRKAG2,DLD,ANKH,PRKN,DCTN1,NDUFAF2,PTCH2,GRIA3,IGF1R,FER,LRP8,UBQLN1,SCN1A,CSNK2A1,SMAD3,PPP2R1B,DMD,ITGA7,TRPS1,RAB33A,ABHD2,GRM1,TRIOBP,SOX6,TENM1,CTNNB1,DIAPH1,DLC1,SOX2,NCOA3,INHA,SF1,RDX,FBXO33,ROBO2,KMT2D,ARRB1,SALL3,CKS1B,CDC25B,TIAL1,DST,CUX1,DNAJB2,HNRNPK,HSF2,DDX17,BICC1,XRCC5,FZD8,PRKG1,DAB2,AFF4,RBPJ,HES5,STMP1,RBM5,RCAN2,SRA1,CACNG2,SMARCA2,SF3B4,GABRA4,SLIT3,NR…
GO:BP	positive regulation of cellular process	GO:0048522	5.8521e-11	10.2327	5641	398	176	21092	CACNB3,CNTNAP2,PTPN11,PRKAG2,PRKN,DCTN1,PTCH2,IGF1R,FER,LRP8,UBQLN1,CSNK2A1,SMAD3,PPP2R1B,DMD,GRM1,TRIOBP,SOX6,TENM1,CTNNB1,DIAPH1,DLC1,SOX2,NCOA3,INHA,RDX,ROBO2,KMT2D,ARRB1,CKS1B,CDC25B,TIAL1,CUX1,DNAJB2,HNRNPK,HSF2,DDX17,XRCC5,FZD8,DAB2,RBPJ,HES5,STMP1,RBM5,SRA1,CACNG2,SMARCA2,SF3B4,NR1D1,POGLUT1,PPP1R9B,PTRH2,HDAC1,LARP1B,COBL,MAPK7,SIN3A,IMPACT,POR,RPL11,RPS4X,APP,GPR137C,ATAD2,ZNF507,NFIA,EG…
GO:BP	positive regulation of nitrogen compound metabolic process	GO:0051173	7.53988e-11	10.1226	3152	398	118	21092	PTPN11,PRKAG2,PRKN,IGF1R,LRP8,UBQLN1,CSNK2A1,SMAD3,TENM1,CTNNB1,DLC1,SOX2,NCOA3,INHA,RDX,FBXO33,KMT2D,ARRB1,CKS1B,CDC25B,DNAJB2,HNRNPK,HSF2,DDX17,XRCC5,FZD8,DAB2,RBPJ,HES5,SRA1,SMARCA2,SF3B4,NR1D1,HDAC1,LARP1B,MAPK7,SIN3A,IMPACT,RPS4X,APP,ATAD2,ZNF507,NFIA,ZBTB18,TFE3,COA3,SMARCC2,DPF2,TACC1,ID4,ATP2B4,CCND2,CTSC,CSPG4,KDR,PHIP,SUMO1,PLPP3,LCP2,TRIM28,KMT2A,CCT3,SPON1,ZFP36L2,AATF,DAZAP2,BCL11B,I…
GO:BP	multicellular organism development	GO:0007275	6.00321e-10	9.22162	4823	398	155	21092	CNTNAP2,C1GALT1,PTPN11,DLD,ANKH,PRKN,DCTN1,PTCH2,IGF1R,FER,LRP8,SMAD3,IMPDH2,PAPSS2,DMD,ITGA7,TRPS1,TRIOBP,SOX6,TENM1,CTNNB1,DLC1,SOX2,NCOA3,TTLL5,INHA,NEBL,SF1,ROBO2,CUX1,BICC1,XRCC5,FZD8,PRKG1,DAB2,RBPJ,HES5,SMARCA2,KLHL3,SLIT3,NR1D1,POGLUT1,PPP1R9B,TUBB2A,HDAC1,PREX2,COBL,L3MBTL3,MAPK7,AFF3,SIN3A,IMPACT,POR,BTBD7,APP,KIF2A,FBXO45,CELSR2,SP9,NFIA,TFE3,DOP1B,CDKL5,NRXN3,SMARCC2,DPF2,TACC1,ATP2B2…
GO:BP	nervous system development	GO:0007399	7.28423e-10	9.13762	2504	398	99	21092	CNTNAP2,PTPN11,PRKN,DCTN1,IGF1R,LRP8,DMD,TRIOBP,SOX6,TENM1,CTNNB1,DLC1,SOX2,ROBO2,CUX1,XRCC5,FZD8,PRKG1,DAB2,RBPJ,HES5,SMARCA2,SLIT3,NR1D1,PPP1R9B,TUBB2A,HDAC1,PREX2,COBL,SIN3A,IMPACT,APP,KIF2A,FBXO45,CELSR2,NFIA,CDKL5,NRXN3,SMARCC2,DPF2,TACC1,ATP2B2,RIMS2,ID4,ATP2B4,CTSC,CSPG4,GAP43,STXBP1,PLPP3,DLX6,GPC6,SYN1,STRAP,BCL11B,TLX3,MARK4,HOOK3,PCDHB5,USP9X,NLGN1,OPCML,HSPG2,ADGRL3,EFNA5,SEMA5A,CDK6,…
GO:BP	positive regulation of macromolecule metabolic process	GO:0010604	1.453e-09	8.83773	3535	398	124	21092	PTPN11,PRKAG2,PRKN,IGF1R,LRP8,UBQLN1,CSNK2A1,SMAD3,TENM1,CTNNB1,DLC1,SOX2,NCOA3,INHA,RDX,FBXO33,KMT2D,ARRB1,CKS1B,CDC25B,DNAJB2,HNRNPK,HSF2,DDX17,XRCC5,FZD8,DAB2,RBPJ,HES5,STMP1,SRA1,SMARCA2,SF3B4,NR1D1,HDAC1,LARP1B,MAPK7,SIN3A,IMPACT,RPL11,RPS4X,APP,ATAD2,ZNF507,NFIA,ZBTB18,TFE3,COA3,SMARCC2,DPF2,TACC1,ID4,ATP2B4,CCND2,CTSC,CSPG4,KDR,PHIP,SUMO1,PLPP3,LCP2,TRIM28,KMT2A,CCT3,SPON1,ZFP36L2,AATF,DAZ…
GO:BP	positive regulation of cellular metabolic process	GO:0031325	1.77575e-09	8.75062	3094	398	113	21092	PTPN11,PRKAG2,PRKN,IGF1R,LRP8,UBQLN1,SMAD3,TENM1,CTNNB1,DLC1,SOX2,NCOA3,INHA,KMT2D,ARRB1,CKS1B,CDC25B,DNAJB2,HNRNPK,HSF2,DDX17,XRCC5,FZD8,DAB2,RBPJ,HES5,SRA1,SMARCA2,SF3B4,NR1D1,HDAC1,LARP1B,MAPK7,SIN3A,IMPACT,POR,RPS4X,APP,ATAD2,ZNF507,NFIA,ZBTB18,TFE3,COA3,SMARCC2,DPF2,TACC1,ID4,ATP2B4,CCND2,CSPG4,KDR,PHIP,SUMO1,PLPP3,LCP2,TRIM28,KMT2A,CCT3,ZFP36L2,AATF,DAZAP2,BCL11B,ING3,BABAM2,FMN2,TCF20,USP9…
GO:BP	positive regulation of biological process	GO:0048518	3.35282e-09	8.47459	6309	398	185	21092	CACNB3,CNTNAP2,PTPN11,PRKAG2,PRKN,DCTN1,PTCH2,IGF1R,FER,LRP8,UBQLN1,CSNK2A1,SMAD3,PPP2R1B,DMD,GRM1,TRIOBP,SOX6,TENM1,CTNNB1,DIAPH1,DLC1,SOX2,NCOA3,INHA,RDX,FBXO33,ROBO2,KMT2D,ARRB1,CKS1B,CDC25B,TIAL1,CUX1,DNAJB2,HNRNPK,HSF2,DDX17,XRCC5,FZD8,DAB2,RBPJ,HES5,STMP1,RBM5,SRA1,CACNG2,SMARCA2,SF3B4,NR1D1,POGLUT1,PPP1R9B,PTRH2,AHCYL1,HDAC1,LARP1B,COBL,MAPK7,SIN3A,IMPACT,POR,RPL11,RPS4X,APP,GPR137C,ATAD2,…
GO:BP	positive regulation of metabolic process	GO:0009893	4.86276e-09	8.31312	3849	398	130	21092	PTPN11,PRKAG2,PRKN,IGF1R,LRP8,UBQLN1,CSNK2A1,SMAD3,TENM1,CTNNB1,DLC1,SOX2,NCOA3,INHA,RDX,FBXO33,KMT2D,ARRB1,CKS1B,CDC25B,DNAJB2,HNRNPK,HSF2,DDX17,XRCC5,FZD8,DAB2,RBPJ,HES5,STMP1,SRA1,SMARCA2,SF3B4,NR1D1,HDAC1,LARP1B,MAPK7,SIN3A,IMPACT,POR,RPL11,RPS4X,APP,ATAD2,ZNF507,NFIA,ZBTB18,TFE3,COA3,SMARCC2,DPF2,TACC1,ID4,ATP2B4,CCND2,CTSC,CSPG4,KDR,PHIP,SUMO1,PLPP3,LCP2,TRIM28,KMT2A,CCT3,SPON1,ZFP36L2,AATF…
GO:BP	neurogenesis	GO:0022008	2.71048e-08	7.56695	1680	398	73	21092	CNTNAP2,PTPN11,PRKN,IGF1R,LRP8,DMD,TRIOBP,SOX6,TENM1,CTNNB1,SOX2,ROBO2,CUX1,XRCC5,FZD8,PRKG1,DAB2,RBPJ,HES5,SLIT3,NR1D1,PPP1R9B,TUBB2A,HDAC1,PREX2,COBL,SIN3A,IMPACT,APP,FBXO45,CELSR2,CDKL5,NRXN3,ATP2B2,RIMS2,ID4,CSPG4,GAP43,STXBP1,PLPP3,SYN1,STRAP,BCL11B,TLX3,HOOK3,USP9X,NLGN1,OPCML,ADGRL3,EFNA5,SEMA5A,CDK6,PLXNA4,CPEB3,NTRK3,EPHA7,MAP2K1,DLX1,BMPR2,PCSK1,PTPN9,MMP14,HSPA5,UFL1,RAB10,SH3RF1,HCN1,…
GO:BP	regulation of macromolecule metabolic process	GO:0060255	3.03386e-08	7.518	6842	398	193	21092	PTPN11,PRKAG2,PRKN,IGF1R,FER,LRP8,UBQLN1,CSNK2A1,SMAD3,DMD,TRPS1,SOX6,TENM1,CTNNB1,DLC1,SOX2,NCOA3,INHA,SF1,RDX,FBXO33,KMT2D,ARRB1,SALL3,CKS1B,CDC25B,TIAL1,CUX1,DNAJB2,HNRNPK,HSF2,DDX17,XRCC5,FZD8,DAB2,AFF4,RBPJ,HES5,STMP1,RBM5,SRA1,SMARCA2,SF3B4,SLIT3,NR1D1,ELP4,PPP1R9B,PTRH2,AHCYL1,HDAC1,CLTC,LARP1B,ZNF772,L3MBTL3,MAPK7,AFF3,SIN3A,IMPACT,POR,RPL11,RPS4X,APP,ATAD2,ZNF507,CELSR2,SP9,NFIA,KLF9,ZBT…
GO:BP	anatomical structure morphogenesis	GO:0009653	4.35166e-08	7.36134	2722	398	100	21092	CNTNAP2,C1GALT1,PTPN11,DLD,ANKH,PRKN,IGF1R,FER,LRP8,SMAD3,PPP2R1B,DMD,ITGA7,TRIOBP,SOX6,CTNNB1,DIAPH1,DLC1,SOX2,NEBL,RDX,ROBO2,CUX1,FZD8,DAB2,RBPJ,HES5,KLHL3,SLIT3,POGLUT1,HDAC1,PREX2,COBL,MAPK7,AFF3,SIN3A,IMPACT,POR,BTBD7,APP,FBXO45,CELSR2,SP9,EGFLAM,CDKL5,NRXN3,FGD4,RIMS2,ID4,ATP2B4,CSPG4,GAP43,KDR,PHIP,STXBP1,PLPP3,CAPZB,DLX6,GPC6,TRIM28,MMP16,HS2ST1,CLIC4,BCL11B,TMEM135,COL18A1,USP9X,NEB,NLGN…
GO:BP	regulation of protein metabolic process	GO:0051246	4.67662e-08	7.33007	2567	398	96	21092	PTPN11,PRKAG2,PRKN,FER,LRP8,UBQLN1,CSNK2A1,SMAD3,DMD,TENM1,CTNNB1,DLC1,SOX2,INHA,RDX,FBXO33,ARRB1,CKS1B,CDC25B,DNAJB2,XRCC5,FZD8,DAB2,HES5,ELP4,PPP1R9B,HDAC1,LARP1B,MAPK7,SIN3A,IMPACT,POR,RPL11,RPS4X,APP,COA3,EIF4B,ATP2B4,CCND2,CTSC,CSPG4,DUSP6,KDR,PHIP,SUMO1,PLPP3,LCP2,KMT2A,SPON1,PKIA,ZFP36L2,AATF,DAZAP2,AIDA,FMN2,USP9X,TNRC6C,WNK3,EFNA5,CPEB3,NTRK3,EPHA7,DDX3X,MLH1,FHIT,NDUFS4,MAP2K1,BMPR2,BBC…
GO:BP	system development	GO:0048731	5.02369e-08	7.29898	4369	398	139	21092	CNTNAP2,C1GALT1,PTPN11,ANKH,PRKN,DCTN1,IGF1R,FER,LRP8,SMAD3,IMPDH2,PAPSS2,DMD,TRPS1,TRIOBP,SOX6,TENM1,CTNNB1,DLC1,SOX2,TTLL5,INHA,NEBL,SF1,ROBO2,CUX1,BICC1,XRCC5,FZD8,PRKG1,DAB2,RBPJ,HES5,SMARCA2,KLHL3,SLIT3,NR1D1,POGLUT1,PPP1R9B,TUBB2A,HDAC1,PREX2,COBL,L3MBTL3,MAPK7,SIN3A,IMPACT,POR,BTBD7,APP,KIF2A,FBXO45,CELSR2,NFIA,TFE3,CDKL5,NRXN3,SMARCC2,DPF2,TACC1,ATP2B2,RIMS2,ID4,ATP2B4,CTSC,CSPG4,DUSP6,GA…
GO:BP	protein metabolic process	GO:0019538	5.79866e-08	7.23667	5462	398	163	21092	C1GALT1,PTPN11,PRKAG2,DLD,PRKN,IGF1R,F8,FER,LRP8,UBQLN1,GALNT2,CSNK2A1,SMAD3,PPP2R1B,DMD,TRIOBP,TENM1,CTNNB1,DLC1,SOX2,NCOA3,TTLL5,INHA,RDX,FBXO33,KMT2D,ARRB1,CKS1B,CDC25B,DNAJB2,XRCC5,FZD8,PRKG1,PAMR1,DAB2,HES5,KLHL3,NR1D1,ELP4,POGLUT1,STT3B,PPP1R9B,RSPRY1,HDAC1,LARP1B,ERLEC1,KLHL9,MAPK7,SIN3A,IMPACT,POR,RPL11,RPS4X,APP,FBXO45,EGFLAM,COA3,CDKL5,ZDHHC20,EIF4B,ATP2B4,CCND2,CTSC,CSPG4,DUSP6,KDR,PHI…
GO:BP	cellular developmental process	GO:0048869	1.04025e-07	6.98286	4280	398	136	21092	CNTNAP2,C1GALT1,PTPN11,DLD,PRKN,PTCH2,IGF1R,FER,LRP8,SMAD3,DMD,ITGA7,TRPS1,ABHD2,TRIOBP,SOX6,TENM1,CTNNB1,SOX2,NCOA3,INHA,NEBL,SF1,RDX,ROBO2,KMT2D,CDC25B,TIAL1,CUX1,DDX17,XRCC5,FZD8,PRKG1,DAB2,AFF4,RBPJ,HES5,SRA1,SMARCA2,SLIT3,NR1D1,PPP1R9B,TUBB2A,HDAC1,PREX2,CLTC,COBL,L3MBTL3,MAPK7,SIN3A,IMPACT,POR,APP,RETREG1,KIF2A,FBXO45,CELSR2,TFE3,CDKL5,NRXN3,SMARCC2,DPF2,ATP2B2,RIMS2,ID4,CSPG4,DUSP6,GAP43,K…
GO:BP	regulation of metabolic process	GO:0019222	1.10709e-07	6.95582	7377	398	202	21092	PTPN11,PRKAG2,PRKN,IGF1R,FER,LRP8,UBQLN1,CSNK2A1,SMAD3,DMD,TRPS1,SOX6,TENM1,CTNNB1,DLC1,SOX2,NCOA3,INHA,SF1,RDX,FBXO33,KMT2D,ARRB1,SALL3,CKS1B,CDC25B,TIAL1,CUX1,DNAJB2,HNRNPK,HSF2,DDX17,XRCC5,FZD8,DAB2,AFF4,RBPJ,HES5,STMP1,RBM5,SRA1,SMARCA2,SF3B4,SLIT3,NR1D1,ELP4,PPP1R9B,PTRH2,AHCYL1,HDAC1,ATP6V0A1,CLTC,LARP1B,ZNF772,L3MBTL3,MAPK7,AFF3,SIN3A,IMPACT,POR,RPL11,RPS4X,APP,ATAD2,ZNF507,CELSR2,SP9,NFIA…
GO:BP	cell differentiation	GO:0030154	1.45491e-07	6.83716	4256	398	135	21092	CNTNAP2,C1GALT1,PTPN11,DLD,PRKN,PTCH2,IGF1R,FER,LRP8,SMAD3,DMD,ITGA7,TRPS1,ABHD2,TRIOBP,SOX6,TENM1,CTNNB1,SOX2,NCOA3,INHA,NEBL,SF1,RDX,ROBO2,KMT2D,CDC25B,TIAL1,CUX1,DDX17,XRCC5,FZD8,PRKG1,DAB2,AFF4,RBPJ,HES5,SRA1,SMARCA2,SLIT3,NR1D1,PPP1R9B,TUBB2A,HDAC1,PREX2,CLTC,COBL,L3MBTL3,MAPK7,SIN3A,IMPACT,POR,APP,RETREG1,KIF2A,FBXO45,CELSR2,TFE3,CDKL5,NRXN3,SMARCC2,DPF2,ATP2B2,RIMS2,ID4,CSPG4,DUSP6,GAP43,K…
GO:BP	regulation of nucleobase-containing compound metabolic process	GO:0019219	1.64212e-07	6.7846	4088	398	131	21092	PRKAG2,PRKN,IGF1R,FER,LRP8,SMAD3,DMD,TRPS1,SOX6,TENM1,CTNNB1,SOX2,NCOA3,SF1,KMT2D,ARRB1,SALL3,CKS1B,TIAL1,CUX1,HNRNPK,HSF2,DDX17,XRCC5,DAB2,RBPJ,HES5,RBM5,SRA1,SMARCA2,SF3B4,NR1D1,ELP4,AHCYL1,HDAC1,ZNF772,L3MBTL3,MAPK7,AFF3,SIN3A,IMPACT,APP,ATAD2,ZNF507,CELSR2,SP9,NFIA,KLF9,ZBTB18,TFE3,SMARCC2,DPF2,INTS2,TACC1,ID4,ATP2B4,PHIP,SUMO1,PLPP3,DLX6,TRIM28,KMT2A,CCT3,RAD21,PKIA,ZFP36L2,STRAP,AATF,ZNF564…
GO:BP	cell morphogenesis	GO:0000902	2.08508e-07	6.68088	1030	398	52	21092	CNTNAP2,PTPN11,PRKN,IGF1R,FER,LRP8,DMD,ITGA7,TRIOBP,CTNNB1,DIAPH1,DLC1,RDX,ROBO2,CUX1,DAB2,SLIT3,PREX2,COBL,SIN3A,IMPACT,APP,FBXO45,CELSR2,CDKL5,NRXN3,FGD4,RIMS2,GAP43,KDR,PHIP,STXBP1,CAPZB,CLIC4,BCL11B,COL18A1,USP9X,NLGN1,CDH24,EFNA5,SEMA5A,PLXNA4,EPHA7,MAP2K1,BMPR2,STK4,ZMPSTE24,RAB10,FGD6,LRATD1,KLF7,EPHB4
GO:BP	regulation of RNA metabolic process	GO:0051252	2.92192e-07	6.53433	3775	398	123	21092	PRKN,FER,LRP8,SMAD3,DMD,TRPS1,SOX6,TENM1,CTNNB1,SOX2,NCOA3,SF1,KMT2D,ARRB1,SALL3,CKS1B,TIAL1,CUX1,HNRNPK,HSF2,DDX17,XRCC5,DAB2,RBPJ,HES5,RBM5,SRA1,SMARCA2,SF3B4,NR1D1,ELP4,AHCYL1,HDAC1,ZNF772,L3MBTL3,MAPK7,AFF3,SIN3A,IMPACT,APP,ATAD2,ZNF507,CELSR2,SP9,NFIA,KLF9,ZBTB18,TFE3,SMARCC2,DPF2,INTS2,TACC1,ID4,ATP2B4,PHIP,SUMO1,PLPP3,DLX6,TRIM28,KMT2A,RAD21,PKIA,ZFP36L2,STRAP,AATF,ZNF564,BCL11B,ING3,TLX3,…
GO:BP	regulation of macromolecule biosynthetic process	GO:0010556	3.08527e-07	6.51071	3951	398	127	21092	PRKN,FER,LRP8,SMAD3,DMD,TRPS1,SOX6,TENM1,CTNNB1,SOX2,NCOA3,SF1,KMT2D,ARRB1,SALL3,CKS1B,TIAL1,CUX1,HNRNPK,HSF2,DDX17,XRCC5,DAB2,RBPJ,HES5,SRA1,SMARCA2,NR1D1,ELP4,HDAC1,CLTC,LARP1B,ZNF772,L3MBTL3,MAPK7,AFF3,SIN3A,IMPACT,RPS4X,APP,ATAD2,ZNF507,CELSR2,SP9,NFIA,KLF9,ZBTB18,TFE3,COA3,SMARCC2,DPF2,INTS2,TACC1,EIF4B,ID4,ATP2B4,KDR,PHIP,SUMO1,PLPP3,DLX6,TRIM28,KMT2A,CCT3,RAD21,PKIA,ZFP36L2,STRAP,AATF,ZNF5…
GO:BP	regulation of biosynthetic process	GO:0009889	3.39237e-07	6.4695	4175	398	132	21092	PRKN,IGF1R,FER,LRP8,SMAD3,DMD,TRPS1,SOX6,TENM1,CTNNB1,SOX2,NCOA3,SF1,KMT2D,ARRB1,SALL3,CKS1B,TIAL1,CUX1,HNRNPK,HSF2,DDX17,XRCC5,DAB2,RBPJ,HES5,SRA1,SMARCA2,NR1D1,ELP4,HDAC1,CLTC,LARP1B,ZNF772,L3MBTL3,MAPK7,AFF3,SIN3A,IMPACT,POR,RPS4X,APP,ATAD2,ZNF507,CELSR2,SP9,NFIA,KLF9,ZBTB18,TFE3,COA3,SMARCC2,DPF2,INTS2,TACC1,EIF4B,ID4,ATP2B4,KDR,PHIP,SUMO1,PLPP3,DLX6,TRIM28,KMT2A,CCT3,RAD21,PKIA,ZFP36L2,STRAP…
GO:BP	macromolecule biosynthetic process	GO:0009059	3.50357e-07	6.45549	4801	398	146	21092	C1GALT1,PRKN,FER,LRP8,GALNT2,SMAD3,DMD,TRPS1,SOX6,TENM1,CTNNB1,SOX2,NCOA3,INHA,SF1,POLR2A,KMT2D,ARRB1,SALL3,CKS1B,TIAL1,CUX1,HNRNPK,HSF2,DDX17,XRCC5,DAB2,RBPJ,HES5,GTF3C3,SRA1,SMARCA2,NR1D1,ELP4,POGLUT1,STT3B,HDAC1,CLTC,LARP1B,ZNF772,L3MBTL3,MAPK7,AFF3,SIN3A,IMPACT,RPL11,RPS4X,APP,ATAD2,ZNF507,CELSR2,SP9,NFIA,KLF9,ZBTB18,TFE3,COA3,ZDHHC20,SMARCC2,DPF2,POLA1,INTS2,TACC1,EIF4B,ID4,ATP2B4,KDR,PHIP,S…
GO:BP	generation of neurons	GO:0048699	5.03163e-07	6.29829	1465	398	64	21092	CNTNAP2,PTPN11,PRKN,IGF1R,LRP8,DMD,TRIOBP,TENM1,CTNNB1,SOX2,ROBO2,CUX1,FZD8,PRKG1,DAB2,RBPJ,HES5,SLIT3,PPP1R9B,TUBB2A,HDAC1,PREX2,COBL,SIN3A,IMPACT,APP,FBXO45,CELSR2,CDKL5,NRXN3,ATP2B2,RIMS2,ID4,GAP43,STXBP1,SYN1,STRAP,BCL11B,TLX3,USP9X,NLGN1,OPCML,ADGRL3,EFNA5,SEMA5A,CDK6,PLXNA4,CPEB3,NTRK3,EPHA7,MAP2K1,DLX1,BMPR2,PTPN9,HSPA5,RAB10,SH3RF1,HCN1,RTN1,ACTL6B,CREB3L2,TRIM67,KLF7,EPHB4
GO:BP	regulation of cellular biosynthetic process	GO:0031326	5.27975e-07	6.27739	4114	398	130	21092	PRKN,IGF1R,FER,LRP8,SMAD3,DMD,TRPS1,SOX6,TENM1,CTNNB1,SOX2,NCOA3,SF1,KMT2D,ARRB1,SALL3,CKS1B,TIAL1,CUX1,HNRNPK,HSF2,DDX17,XRCC5,DAB2,RBPJ,HES5,SRA1,SMARCA2,NR1D1,ELP4,HDAC1,LARP1B,ZNF772,L3MBTL3,MAPK7,AFF3,SIN3A,IMPACT,POR,RPS4X,APP,ATAD2,ZNF507,CELSR2,SP9,NFIA,KLF9,ZBTB18,TFE3,COA3,SMARCC2,DPF2,INTS2,TACC1,EIF4B,ID4,ATP2B4,PHIP,SUMO1,PLPP3,DLX6,TRIM28,KMT2A,CCT3,RAD21,PKIA,ZFP36L2,STRAP,AATF,ZNF…
GO:BP	regulation of developmental process	GO:0050793	7.49136e-07	6.12544	2499	398	91	21092	PTPN11,ANKH,PRKN,PTCH2,IGF1R,LRP8,SMAD3,DMD,ITGA7,TRPS1,TRIOBP,SOX6,CTNNB1,DIAPH1,DLC1,SOX2,NCOA3,INHA,RDX,ROBO2,CUX1,DDX17,XRCC5,DAB2,RBPJ,HES5,SRA1,SMARCA2,NR1D1,POGLUT1,HDAC1,COBL,MAPK7,SIN3A,IMPACT,POR,BTBD7,APP,CELSR2,TFE3,CDKL5,SMARCC2,DPF2,FGD4,RIMS2,ID4,ATP2B4,CTSC,DUSP6,KDR,PHIP,CAPZB,GPC6,ZFP36L2,BCL11B,TLX3,TMEM135,HOOK3,NLGN1,HSPG2,EFNA5,SEMA5A,CDK6,PLXNA4,CPEB3,ADAM12,NTRK3,EPHA7,MLH…
GO:BP	regulation of cellular component organization	GO:0051128	1.00738e-06	5.99681	2355	398	87	21092	CNTNAP2,PTPN11,PRKN,DCTN1,PTCH2,IGF1R,FER,LRP8,CSNK2A1,SMAD3,DMD,TRIOBP,TENM1,CTNNB1,DIAPH1,DLC1,RDX,ROBO2,ARRB1,CUX1,DNAJB2,HNRNPK,XRCC5,DAB2,STMP1,SMARCA2,SLIT3,PPP1R9B,CLTC,COBL,L3MBTL3,SIN3A,IMPACT,APP,CDKL5,SMARCC2,DPF2,RIMS2,GAP43,KDR,PHIP,STXBP1,SUMO1,CAPZB,GPC6,TRIM28,CCT3,RAD21,CLIC4,AAK1,DERL2,AIDA,TMEM135,MARK4,LSM11,NEB,NLGN1,SLF2,EFNA5,SEMA5A,PLXNA4,TTBK2,NTRK3,EPHA7,DDX3X,MAP2K1,BMP…
GO:BP	animal organ development	GO:0048513	1.04207e-06	5.9821	3591	398	117	21092	CNTNAP2,C1GALT1,PTPN11,ANKH,DCTN1,PTCH2,IGF1R,FER,LRP8,SMAD3,IMPDH2,PAPSS2,DMD,ITGA7,TRPS1,TRIOBP,SOX6,CTNNB1,DLC1,SOX2,NCOA3,TTLL5,INHA,NEBL,SF1,ROBO2,DDX17,BICC1,XRCC5,FZD8,PRKG1,DAB2,RBPJ,HES5,SMARCA2,KLHL3,SLIT3,POGLUT1,PPP1R9B,HDAC1,COBL,L3MBTL3,SIN3A,POR,BTBD7,APP,FBXO45,CELSR2,NFIA,EGFLAM,ZBTB18,TFE3,SMARCC2,DPF2,TACC1,ATP2B2,ID4,ATP2B4,DUSP6,KDR,DLX6,GPC6,TRIM28,KMT2A,MMP16,ZFP36L2,HS2ST1…
GO:BP	organic substance biosynthetic process	GO:1901576	1.16464e-06	5.93381	5854	398	167	21092	C1GALT1,PRKAG2,DLD,PRKN,IGF1R,FER,LRP8,GALNT2,SMAD3,IMPDH2,PAPSS2,DMD,TRPS1,ABHD2,SOX6,TENM1,CTNNB1,SOX2,NCOA3,INHA,SF1,POLR2A,KMT2D,ARRB1,SALL3,CKS1B,TIAL1,CUX1,HNRNPK,HSF2,DDX17,XRCC5,DAB2,RBPJ,HES5,GTF3C3,SRA1,SMARCA2,NDUFA12,NR1D1,ELP4,POGLUT1,STT3B,NADK2,HDAC1,CLTC,LARP1B,ZNF772,PPIP5K2,L3MBTL3,MAPK7,AFF3,SIN3A,IMPACT,POR,RPL11,RPS4X,APP,ATAD2,ZNF507,CELSR2,SP9,NFIA,KLF9,ZBTB18,TFE3,COA3,ZDH…
GO:BP	protein modification process	GO:0036211	1.34956e-06	5.86981	3649	398	118	21092	C1GALT1,PTPN11,PRKAG2,DLD,PRKN,IGF1R,FER,LRP8,UBQLN1,GALNT2,CSNK2A1,PPP2R1B,DMD,TRIOBP,TENM1,CTNNB1,DLC1,NCOA3,TTLL5,INHA,FBXO33,KMT2D,ARRB1,CKS1B,CDC25B,DNAJB2,XRCC5,FZD8,PRKG1,DAB2,HES5,KLHL3,POGLUT1,STT3B,PPP1R9B,RSPRY1,HDAC1,KLHL9,MAPK7,SIN3A,IMPACT,POR,RPL11,APP,FBXO45,EGFLAM,CDKL5,ZDHHC20,ATP2B4,CCND2,CSPG4,DUSP6,KDR,PHIP,TPP2,SUMO1,PLPP3,PIGK,LCP2,TRIM28,KMT2A,PKIA,DAZAP2,AAK1,UBE2W,ABHD10…
GO:BP	head development	GO:0060322	1.36756e-06	5.86405	828	398	44	21092	CNTNAP2,PTPN11,IGF1R,LRP8,DMD,SOX6,CTNNB1,DLC1,SOX2,ROBO2,XRCC5,PRKG1,RBPJ,HES5,PPP1R9B,HDAC1,SIN3A,APP,FBXO45,CELSR2,TACC1,ATP2B2,ID4,ATP2B4,DLX6,BCL11B,HOOK3,HSPG2,ADGRL3,SEMA5A,CDK6,PLXNA4,TTBK2,EPHA7,NDUFS4,MAP2K1,DLX1,AFF2,PCSK1,SSBP3,ARCN1,SYNGR3,MMP14,HSPA5
GO:BP	negative regulation of biological process	GO:0048519	1.46727e-06	5.83349	5918	398	168	21092	PTPN11,PRKAG2,PRKN,NDUFAF2,PTCH2,IGF1R,FER,UBQLN1,CSNK2A1,SMAD3,DMD,TRPS1,ABHD2,TRIOBP,SOX6,TENM1,CTNNB1,DIAPH1,DLC1,SOX2,INHA,SF1,RDX,ROBO2,KMT2D,ARRB1,TIAL1,CUX1,DNAJB2,HNRNPK,DDX17,BICC1,XRCC5,PRKG1,DAB2,RBPJ,HES5,RBM5,SRA1,SMARCA2,SLIT3,NR1D1,PPP1R9B,PTRH2,HDAC1,CLTC,GRIA1,ERLEC1,L3MBTL3,MAPK7,SIN3A,IMPACT,POR,RPL11,APP,RETREG1,KLF9,ZBTB18,TFE3,SMARCC2,DPF2,ID4,ATP2B4,CCND2,CTSC,DUSP6,KDR,PHI…
GO:BP	central nervous system development	GO:0007417	2.01549e-06	5.69562	1065	398	51	21092	CNTNAP2,PTPN11,PRKN,DCTN1,IGF1R,LRP8,DMD,SOX6,CTNNB1,DLC1,SOX2,ROBO2,XRCC5,PRKG1,RBPJ,HES5,NR1D1,PPP1R9B,HDAC1,SIN3A,APP,FBXO45,CELSR2,TACC1,ATP2B2,ID4,ATP2B4,GAP43,PLPP3,BCL11B,TLX3,HOOK3,HSPG2,ADGRL3,SEMA5A,CDK6,PLXNA4,TTBK2,NTRK3,EPHA7,NDUFS4,MAP2K1,DLX1,AFF2,STK4,PCSK1,SSBP3,ARCN1,SYNGR3,HSPA5,ACTL6B
GO:BP	regulation of signaling	GO:0023051	2.03593e-06	5.69124	3374	398	111	21092	PTPN11,PRKN,NDUFAF2,PTCH2,IGF1R,FER,LRP8,UBQLN1,CSNK2A1,SMAD3,PPP2R1B,DMD,GRM1,TENM1,CTNNB1,DLC1,SOX2,NCOA3,INHA,RDX,ROBO2,KMT2D,ARRB1,TIAL1,HNRNPK,BICC1,FZD8,DAB2,RBPJ,HES5,CACNG2,SLIT3,NR1D1,POGLUT1,PPP1R9B,PLCB4,HDAC1,PREX2,GRIA1,MAPK7,SIN3A,POR,RPL11,APP,GPR137C,MYO9B,ARHGEF40,NRXN3,FGD4,ATP2B2,RIMS2,ATP2B4,CTSC,CSPG4,DUSP6,KDR,PHIP,STXBP1,PLPP3,AKAP5,GPC6,ARHGAP29,KMT2A,SYN1,STRAP,AATF,AAK1,…
GO:BP	brain development	GO:0007420	2.33182e-06	5.63231	780	398	42	21092	CNTNAP2,PTPN11,IGF1R,LRP8,DMD,SOX6,CTNNB1,DLC1,SOX2,ROBO2,XRCC5,PRKG1,RBPJ,HES5,PPP1R9B,HDAC1,SIN3A,APP,FBXO45,CELSR2,TACC1,ATP2B2,ID4,ATP2B4,BCL11B,HOOK3,HSPG2,ADGRL3,SEMA5A,CDK6,PLXNA4,TTBK2,EPHA7,NDUFS4,MAP2K1,DLX1,AFF2,PCSK1,SSBP3,ARCN1,SYNGR3,HSPA5
GO:BP	macromolecule modification	GO:0043412	3.17786e-06	5.49787	3874	398	122	21092	C1GALT1,PTPN11,PRKAG2,DLD,PRKN,IGF1R,FER,LRP8,UBQLN1,GALNT2,CSNK2A1,PPP2R1B,DMD,TRIOBP,TENM1,CTNNB1,DLC1,NCOA3,TTLL5,INHA,FBXO33,KMT2D,ARRB1,CKS1B,CDC25B,DNAJB2,XRCC5,FZD8,PRKG1,DAB2,HES5,KLHL3,PUS3,ELP4,POGLUT1,STT3B,PPP1R9B,RSPRY1,HDAC1,KLHL9,MAPK7,SIN3A,IMPACT,POR,RPL11,APP,FBXO45,EGFLAM,CDKL5,ZDHHC20,ATP2B4,CCND2,CSPG4,DUSP6,KDR,PHIP,TPP2,SUMO1,PLPP3,PIGK,LCP2,TRIM28,KMT2A,PKIA,DAZAP2,AAK1,UB…
GO:BP	neuron differentiation	GO:0030182	3.43716e-06	5.4638	1393	398	60	21092	CNTNAP2,PTPN11,PRKN,IGF1R,LRP8,DMD,TRIOBP,TENM1,CTNNB1,SOX2,ROBO2,CUX1,FZD8,PRKG1,DAB2,RBPJ,HES5,SLIT3,PPP1R9B,HDAC1,PREX2,COBL,SIN3A,IMPACT,APP,FBXO45,CELSR2,CDKL5,NRXN3,ATP2B2,RIMS2,ID4,GAP43,STXBP1,SYN1,STRAP,BCL11B,TLX3,USP9X,NLGN1,OPCML,EFNA5,SEMA5A,PLXNA4,CPEB3,NTRK3,EPHA7,MAP2K1,DLX1,BMPR2,PTPN9,HSPA5,RAB10,HCN1,RTN1,ACTL6B,CREB3L2,TRIM67,KLF7,EPHB4
GO:BP	regulation of cell communication	GO:0010646	3.51021e-06	5.45467	3363	398	110	21092	PTPN11,PRKN,NDUFAF2,PTCH2,IGF1R,FER,LRP8,UBQLN1,CSNK2A1,SMAD3,PPP2R1B,DMD,GRM1,TENM1,CTNNB1,DLC1,SOX2,NCOA3,INHA,RDX,ROBO2,KMT2D,ARRB1,TIAL1,HNRNPK,BICC1,FZD8,DAB2,RBPJ,HES5,CACNG2,SLIT3,NR1D1,POGLUT1,PPP1R9B,PLCB4,HDAC1,PREX2,GRIA1,MAPK7,SIN3A,POR,RPL11,APP,GPR137C,MYO9B,ARHGEF40,NRXN3,FGD4,RIMS2,ATP2B4,CTSC,CSPG4,DUSP6,KDR,PHIP,STXBP1,PLPP3,AKAP5,GPC6,ARHGAP29,KMT2A,SYN1,STRAP,AATF,AAK1,AIDA,OT…
GO:BP	cell development	GO:0048468	3.6946e-06	5.43243	2142	398	80	21092	CNTNAP2,C1GALT1,PTPN11,DLD,PRKN,IGF1R,FER,LRP8,SMAD3,DMD,ABHD2,TRIOBP,TENM1,CTNNB1,NEBL,RDX,ROBO2,KMT2D,CDC25B,TIAL1,CUX1,XRCC5,PRKG1,DAB2,AFF4,HES5,SMARCA2,SLIT3,NR1D1,PPP1R9B,HDAC1,PREX2,COBL,L3MBTL3,SIN3A,IMPACT,APP,FBXO45,CELSR2,CDKL5,NRXN3,RIMS2,ID4,GAP43,KDR,STXBP1,SYN1,CLIC4,BCL11B,HOOK3,COL18A1,FMN2,USP9X,NEB,NLGN1,OPCML,EFNA5,SEMA5A,CDK6,PLXNA4,CPEB3,NTRK3,EPHA7,MLH1,MAP2K1,DLX1,BMPR2,PT…
GO:BP	biosynthetic process	GO:0009058	3.82264e-06	5.41764	5941	398	167	21092	C1GALT1,PRKAG2,DLD,PRKN,IGF1R,FER,LRP8,GALNT2,SMAD3,IMPDH2,PAPSS2,DMD,TRPS1,ABHD2,SOX6,TENM1,CTNNB1,SOX2,NCOA3,INHA,SF1,POLR2A,KMT2D,ARRB1,SALL3,CKS1B,TIAL1,CUX1,HNRNPK,HSF2,DDX17,XRCC5,DAB2,RBPJ,HES5,GTF3C3,SRA1,SMARCA2,NDUFA12,NR1D1,ELP4,POGLUT1,STT3B,NADK2,HDAC1,CLTC,LARP1B,ZNF772,PPIP5K2,L3MBTL3,MAPK7,AFF3,SIN3A,IMPACT,POR,RPL11,RPS4X,APP,ATAD2,ZNF507,CELSR2,SP9,NFIA,KLF9,ZBTB18,TFE3,COA3,ZDH…
GO:BP	regulation of transcription by RNA polymerase II	GO:0006357	7.47499e-06	5.12639	2574	398	90	21092	PRKN,SMAD3,TRPS1,SOX6,CTNNB1,SOX2,NCOA3,KMT2D,ARRB1,SALL3,TIAL1,CUX1,HNRNPK,HSF2,DDX17,DAB2,RBPJ,HES5,SRA1,SMARCA2,NR1D1,ELP4,HDAC1,ZNF772,MAPK7,SIN3A,IMPACT,APP,ATAD2,ZNF507,SP9,NFIA,KLF9,ZBTB18,TFE3,SMARCC2,DPF2,ID4,ATP2B4,PHIP,DLX6,TRIM28,KMT2A,RAD21,PKIA,STRAP,AATF,ZNF564,BCL11B,TLX3,ZNF628,TCF20,USP9X,ZNF79,KMT2C,ZNF225,CDK6,CPEB3,USP2,ZFP90,ZNF234,ZNF283,CHD1,DDX3X,DLX1,BMPR2,TSHZ1,CHD4,SSB…
GO:BP	positive regulation of protein metabolic process	GO:0051247	9.55765e-06	5.01965	1504	398	62	21092	PTPN11,PRKAG2,PRKN,LRP8,UBQLN1,CSNK2A1,SMAD3,TENM1,CTNNB1,DLC1,INHA,RDX,FBXO33,ARRB1,CKS1B,CDC25B,DNAJB2,XRCC5,FZD8,DAB2,HES5,LARP1B,MAPK7,IMPACT,RPS4X,APP,COA3,ATP2B4,CCND2,CTSC,CSPG4,KDR,SUMO1,PLPP3,LCP2,KMT2A,SPON1,DAZAP2,WNK3,EFNA5,CPEB3,NTRK3,EPHA7,DDX3X,MAP2K1,BMPR2,BBC3,STK4,ECSCR,SAMD4A,ITGA5,SNAI2,FXR2,MMP14,UBE2K,HSPA5,RAB3GAP2,CCDC22,PIAS1,DCUN1D1,SH3RF1,TRIM67
GO:BP	regulation of cellular component biogenesis	GO:0044087	1.03204e-05	4.9863	950	398	46	21092	CNTNAP2,PTPN11,PRKN,DCTN1,FER,SMAD3,TRIOBP,TENM1,DLC1,RDX,ROBO2,DNAJB2,XRCC5,STMP1,COBL,SIN3A,IMPACT,APP,CDKL5,GAP43,KDR,STXBP1,SUMO1,CAPZB,GPC6,TRIM28,AIDA,MARK4,NLGN1,SLF2,EFNA5,NTRK3,EPHA7,DDX3X,CKAP5,BBC3,CCP110,DYNC1H1,SNAI2,FXR2,MMP14,HSPA5,TSG101,MAPRE1,RAB3GAP2,ADD3
GO:BP	cellular biosynthetic process	GO:0044249	1.0803e-05	4.96646	5782	398	162	21092	C1GALT1,PRKAG2,DLD,PRKN,IGF1R,FER,LRP8,GALNT2,SMAD3,IMPDH2,PAPSS2,DMD,TRPS1,ABHD2,SOX6,TENM1,CTNNB1,SOX2,NCOA3,INHA,SF1,POLR2A,KMT2D,ARRB1,SALL3,CKS1B,TIAL1,CUX1,HNRNPK,HSF2,DDX17,XRCC5,DAB2,RBPJ,HES5,GTF3C3,SRA1,SMARCA2,NDUFA12,NR1D1,ELP4,POGLUT1,STT3B,NADK2,HDAC1,LARP1B,ZNF772,L3MBTL3,MAPK7,AFF3,SIN3A,IMPACT,POR,RPL11,RPS4X,APP,ATAD2,ZNF507,CELSR2,SP9,NFIA,KLF9,ZBTB18,TFE3,COA3,ZDHHC20,SMARCC2,…
GO:BP	transcription by RNA polymerase II	GO:0006366	1.10199e-05	4.95782	2676	398	92	21092	PRKN,SMAD3,TRPS1,SOX6,CTNNB1,SOX2,NCOA3,POLR2A,KMT2D,ARRB1,SALL3,TIAL1,CUX1,HNRNPK,HSF2,DDX17,DAB2,RBPJ,HES5,SRA1,SMARCA2,NR1D1,ELP4,HDAC1,ZNF772,MAPK7,SIN3A,IMPACT,APP,ATAD2,ZNF507,SP9,NFIA,KLF9,ZBTB18,TFE3,SMARCC2,DPF2,INTS2,ID4,ATP2B4,PHIP,DLX6,TRIM28,KMT2A,RAD21,PKIA,STRAP,AATF,ZNF564,BCL11B,TLX3,ZNF628,TCF20,USP9X,ZNF79,KMT2C,ZNF225,CDK6,CPEB3,USP2,ZFP90,ZNF234,ZNF283,CHD1,DDX3X,DLX1,BMPR2,T…
GO:BP	RNA biosynthetic process	GO:0032774	1.32865e-05	4.87659	3615	398	114	21092	PRKN,FER,LRP8,SMAD3,DMD,TRPS1,SOX6,TENM1,CTNNB1,SOX2,NCOA3,SF1,POLR2A,KMT2D,ARRB1,SALL3,CKS1B,TIAL1,CUX1,HNRNPK,HSF2,DDX17,XRCC5,DAB2,RBPJ,HES5,GTF3C3,SRA1,SMARCA2,NR1D1,ELP4,HDAC1,ZNF772,L3MBTL3,MAPK7,AFF3,SIN3A,IMPACT,APP,ATAD2,ZNF507,CELSR2,SP9,NFIA,KLF9,ZBTB18,TFE3,SMARCC2,DPF2,POLA1,INTS2,TACC1,ID4,ATP2B4,PHIP,SUMO1,PLPP3,DLX6,TRIM28,KMT2A,RAD21,PKIA,STRAP,AATF,ZNF564,BCL11B,ING3,TLX3,ZNF628…
GO:BP	organonitrogen compound metabolic process	GO:1901564	1.40412e-05	4.8526	6522	398	177	21092	ETFA,C1GALT1,PTPN11,PRKAG2,DLD,PRKN,IGF1R,F8,FER,LRP8,UBQLN1,GALNT2,CSNK2A1,SMAD3,IMPDH2,PPP2R1B,PAPSS2,DMD,TRIOBP,TENM1,CTNNB1,DLC1,SOX2,NCOA3,TTLL5,INHA,RDX,FBXO33,KMT2D,ARRB1,CKS1B,CDC25B,DNAJB2,XRCC5,FZD8,PRKG1,PAMR1,DAB2,HES5,KLHL3,NDUFA12,NR1D1,ELP4,POGLUT1,STT3B,PPP1R9B,NADK2,RSPRY1,HDAC1,CLTC,FUCA1,LARP1B,ERLEC1,KLHL9,MAPK7,SIN3A,IMPACT,POR,RPL11,RPS4X,APP,FBXO45,EGFLAM,COA3,CDKL5,ZDHHC20…
GO:BP	DNA-templated transcription	GO:0006351	1.92765e-05	4.71497	3595	398	113	21092	PRKN,FER,LRP8,SMAD3,DMD,TRPS1,SOX6,TENM1,CTNNB1,SOX2,NCOA3,SF1,POLR2A,KMT2D,ARRB1,SALL3,CKS1B,TIAL1,CUX1,HNRNPK,HSF2,DDX17,XRCC5,DAB2,RBPJ,HES5,GTF3C3,SRA1,SMARCA2,NR1D1,ELP4,HDAC1,ZNF772,L3MBTL3,MAPK7,AFF3,SIN3A,IMPACT,APP,ATAD2,ZNF507,CELSR2,SP9,NFIA,KLF9,ZBTB18,TFE3,SMARCC2,DPF2,INTS2,TACC1,ID4,ATP2B4,PHIP,SUMO1,PLPP3,DLX6,TRIM28,KMT2A,RAD21,PKIA,STRAP,AATF,ZNF564,BCL11B,ING3,TLX3,ZNF628,TCF20…
GO:BP	neuron projection development	GO:0031175	1.95817e-05	4.70815	970	398	46	21092	CNTNAP2,PTPN11,PRKN,IGF1R,LRP8,DMD,TRIOBP,CTNNB1,ROBO2,CUX1,PRKG1,DAB2,HES5,SLIT3,PPP1R9B,PREX2,COBL,SIN3A,IMPACT,APP,FBXO45,CELSR2,CDKL5,NRXN3,RIMS2,GAP43,STXBP1,BCL11B,USP9X,NLGN1,EFNA5,SEMA5A,PLXNA4,CPEB3,NTRK3,EPHA7,MAP2K1,BMPR2,PTPN9,HSPA5,RAB10,ACTL6B,CREB3L2,TRIM67,KLF7,EPHB4
GO:BP	nucleic acid-templated transcription	GO:0097659	1.95843e-05	4.70809	3596	398	113	21092	PRKN,FER,LRP8,SMAD3,DMD,TRPS1,SOX6,TENM1,CTNNB1,SOX2,NCOA3,SF1,POLR2A,KMT2D,ARRB1,SALL3,CKS1B,TIAL1,CUX1,HNRNPK,HSF2,DDX17,XRCC5,DAB2,RBPJ,HES5,GTF3C3,SRA1,SMARCA2,NR1D1,ELP4,HDAC1,ZNF772,L3MBTL3,MAPK7,AFF3,SIN3A,IMPACT,APP,ATAD2,ZNF507,CELSR2,SP9,NFIA,KLF9,ZBTB18,TFE3,SMARCC2,DPF2,INTS2,TACC1,ID4,ATP2B4,PHIP,SUMO1,PLPP3,DLX6,TRIM28,KMT2A,RAD21,PKIA,STRAP,AATF,ZNF564,BCL11B,ING3,TLX3,ZNF628,TCF20…
GO:BP	regulation of DNA-templated transcription	GO:0006355	2.21873e-05	4.6539	3474	398	110	21092	PRKN,FER,LRP8,SMAD3,DMD,TRPS1,SOX6,TENM1,CTNNB1,SOX2,NCOA3,SF1,KMT2D,ARRB1,SALL3,CKS1B,TIAL1,CUX1,HNRNPK,HSF2,DDX17,XRCC5,DAB2,RBPJ,HES5,SRA1,SMARCA2,NR1D1,ELP4,HDAC1,ZNF772,L3MBTL3,MAPK7,AFF3,SIN3A,IMPACT,APP,ATAD2,ZNF507,CELSR2,SP9,NFIA,KLF9,ZBTB18,TFE3,SMARCC2,DPF2,INTS2,TACC1,ID4,ATP2B4,PHIP,SUMO1,PLPP3,DLX6,TRIM28,KMT2A,RAD21,PKIA,STRAP,AATF,ZNF564,BCL11B,ING3,TLX3,ZNF628,TCF20,USP9X,ZNF79,K…
GO:BP	regulation of nucleic acid-templated transcription	GO:1903506	2.25458e-05	4.64693	3475	398	110	21092	PRKN,FER,LRP8,SMAD3,DMD,TRPS1,SOX6,TENM1,CTNNB1,SOX2,NCOA3,SF1,KMT2D,ARRB1,SALL3,CKS1B,TIAL1,CUX1,HNRNPK,HSF2,DDX17,XRCC5,DAB2,RBPJ,HES5,SRA1,SMARCA2,NR1D1,ELP4,HDAC1,ZNF772,L3MBTL3,MAPK7,AFF3,SIN3A,IMPACT,APP,ATAD2,ZNF507,CELSR2,SP9,NFIA,KLF9,ZBTB18,TFE3,SMARCC2,DPF2,INTS2,TACC1,ID4,ATP2B4,PHIP,SUMO1,PLPP3,DLX6,TRIM28,KMT2A,RAD21,PKIA,STRAP,AATF,ZNF564,BCL11B,ING3,TLX3,ZNF628,TCF20,USP9X,ZNF79,K…
GO:BP	regulation of signal transduction	GO:0009966	2.3961e-05	4.62049	2968	398	98	21092	PTPN11,PRKN,PTCH2,IGF1R,FER,UBQLN1,CSNK2A1,SMAD3,PPP2R1B,DMD,GRM1,TENM1,CTNNB1,DLC1,SOX2,NCOA3,INHA,RDX,ROBO2,KMT2D,ARRB1,TIAL1,HNRNPK,BICC1,FZD8,DAB2,RBPJ,HES5,CACNG2,SLIT3,NR1D1,POGLUT1,PPP1R9B,HDAC1,PREX2,MAPK7,SIN3A,POR,RPL11,APP,GPR137C,MYO9B,ARHGEF40,FGD4,RIMS2,ATP2B4,CTSC,CSPG4,DUSP6,KDR,PHIP,PLPP3,AKAP5,GPC6,ARHGAP29,STRAP,AATF,AAK1,AIDA,OTUD7A,BABAM2,INVS,USP9X,NLGN1,RNF152,SEMA5A,USP2,N…
GO:BP	nucleobase-containing compound biosynthetic process	GO:0034654	2.42424e-05	4.61542	4049	398	123	21092	PRKAG2,DLD,PRKN,FER,LRP8,SMAD3,IMPDH2,PAPSS2,DMD,TRPS1,SOX6,TENM1,CTNNB1,SOX2,NCOA3,SF1,POLR2A,KMT2D,ARRB1,SALL3,CKS1B,TIAL1,CUX1,HNRNPK,HSF2,DDX17,XRCC5,DAB2,RBPJ,HES5,GTF3C3,SRA1,SMARCA2,NDUFA12,NR1D1,ELP4,NADK2,HDAC1,ZNF772,L3MBTL3,MAPK7,AFF3,SIN3A,IMPACT,APP,ATAD2,ZNF507,CELSR2,SP9,NFIA,KLF9,ZBTB18,TFE3,SMARCC2,DPF2,POLA1,INTS2,TACC1,ID4,ATP2B4,PHIP,SUMO1,PLPP3,DLX6,TRIM28,KMT2A,CCT3,RAD21,PK…
GO:BP	regulation of RNA biosynthetic process	GO:2001141	2.60325e-05	4.58448	3484	398	110	21092	PRKN,FER,LRP8,SMAD3,DMD,TRPS1,SOX6,TENM1,CTNNB1,SOX2,NCOA3,SF1,KMT2D,ARRB1,SALL3,CKS1B,TIAL1,CUX1,HNRNPK,HSF2,DDX17,XRCC5,DAB2,RBPJ,HES5,SRA1,SMARCA2,NR1D1,ELP4,HDAC1,ZNF772,L3MBTL3,MAPK7,AFF3,SIN3A,IMPACT,APP,ATAD2,ZNF507,CELSR2,SP9,NFIA,KLF9,ZBTB18,TFE3,SMARCC2,DPF2,INTS2,TACC1,ID4,ATP2B4,PHIP,SUMO1,PLPP3,DLX6,TRIM28,KMT2A,RAD21,PKIA,STRAP,AATF,ZNF564,BCL11B,ING3,TLX3,ZNF628,TCF20,USP9X,ZNF79,K…
GO:BP	neuron development	GO:0048666	3.16646e-05	4.49943	1122	398	50	21092	CNTNAP2,PTPN11,PRKN,IGF1R,LRP8,DMD,TRIOBP,TENM1,CTNNB1,ROBO2,CUX1,PRKG1,DAB2,HES5,SLIT3,PPP1R9B,PREX2,COBL,SIN3A,IMPACT,APP,FBXO45,CELSR2,CDKL5,NRXN3,RIMS2,GAP43,STXBP1,SYN1,BCL11B,USP9X,NLGN1,OPCML,EFNA5,SEMA5A,PLXNA4,CPEB3,NTRK3,EPHA7,MAP2K1,BMPR2,PTPN9,HSPA5,RAB10,HCN1,ACTL6B,CREB3L2,TRIM67,KLF7,EPHB4
GO:BP	mitotic cell cycle	GO:0000278	4.12038e-05	4.38506	927	398	44	21092	PTPN11,DCTN1,CTNNB1,RDX,CKS1B,CDC25B,SRA1,SMARCA2,KCNH5,PPP1R9B,TUBB2A,CLTC,SIN3A,APP,KIF2A,SMARCC2,DPF2,POLA1,TACC1,ID4,CCND2,PHIP,RAD21,PKIA,ZFP36L2,AATF,HECA,LSM11,BABAM2,DCTN2,TTC28,SLF2,CDK6,USP2,DDX3X,CKAP5,DYNC1H1,ZMPSTE24,DCTN6,MAPRE1,SYF2,PPME1,E2F6,ACTL6B
GO:BP	organic cyclic compound biosynthetic process	GO:1901362	5.17663e-05	4.28595	4280	398	127	21092	PRKAG2,DLD,PRKN,IGF1R,FER,LRP8,SMAD3,IMPDH2,PAPSS2,DMD,TRPS1,SOX6,TENM1,CTNNB1,SOX2,NCOA3,SF1,POLR2A,KMT2D,ARRB1,SALL3,CKS1B,TIAL1,CUX1,HNRNPK,HSF2,DDX17,XRCC5,DAB2,RBPJ,HES5,GTF3C3,SRA1,SMARCA2,NDUFA12,NR1D1,ELP4,NADK2,HDAC1,ZNF772,L3MBTL3,MAPK7,AFF3,SIN3A,IMPACT,POR,APP,ATAD2,ZNF507,CELSR2,SP9,NFIA,KLF9,ZBTB18,TFE3,SMARCC2,DPF2,POLA1,INTS2,TACC1,ID4,ATP2B4,PHIP,SQLE,SUMO1,PLPP3,DLX6,TRIM28,KMT2…
GO:BP	plasma membrane bounded cell projection organization	GO:0120036	6.52275e-05	4.18557	1509	398	60	21092	CNTNAP2,PTPN11,PRKN,DCTN1,IGF1R,FER,LRP8,DMD,TRIOBP,TENM1,CTNNB1,RDX,ROBO2,CUX1,PRKG1,DAB2,HES5,SLIT3,PPP1R9B,PREX2,COBL,SIN3A,IMPACT,APP,FBXO45,CELSR2,CDKL5,NRXN3,FGD4,RIMS2,CSPG4,GAP43,STXBP1,CAPZB,BCL11B,MARK4,USP9X,NLGN1,EFNA5,SEMA5A,PLXNA4,CFAP70,CPEB3,TTBK2,NTRK3,EPHA7,MAP2K1,BMPR2,CCP110,PTPN9,FXR2,HSPA5,MAPRE1,RAB10,FGD6,ACTL6B,CREB3L2,TRIM67,KLF7,EPHB4
GO:BP	heterocycle biosynthetic process	GO:0018130	7.03407e-05	4.15279	4122	398	123	21092	PRKAG2,DLD,PRKN,FER,LRP8,SMAD3,IMPDH2,PAPSS2,DMD,TRPS1,SOX6,TENM1,CTNNB1,SOX2,NCOA3,SF1,POLR2A,KMT2D,ARRB1,SALL3,CKS1B,TIAL1,CUX1,HNRNPK,HSF2,DDX17,XRCC5,DAB2,RBPJ,HES5,GTF3C3,SRA1,SMARCA2,NDUFA12,NR1D1,ELP4,NADK2,HDAC1,ZNF772,L3MBTL3,MAPK7,AFF3,SIN3A,IMPACT,APP,ATAD2,ZNF507,CELSR2,SP9,NFIA,KLF9,ZBTB18,TFE3,SMARCC2,DPF2,POLA1,INTS2,TACC1,ID4,ATP2B4,PHIP,SUMO1,PLPP3,DLX6,TRIM28,KMT2A,CCT3,RAD21,PK…
GO:BP	cellular nitrogen compound biosynthetic process	GO:0044271	7.42352e-05	4.12939	4853	398	139	21092	PRKAG2,DLD,PRKN,FER,LRP8,SMAD3,IMPDH2,PAPSS2,DMD,TRPS1,SOX6,TENM1,CTNNB1,SOX2,NCOA3,SF1,POLR2A,KMT2D,ARRB1,SALL3,CKS1B,TIAL1,CUX1,HNRNPK,HSF2,DDX17,XRCC5,DAB2,RBPJ,HES5,GTF3C3,SRA1,SMARCA2,NDUFA12,NR1D1,ELP4,NADK2,HDAC1,LARP1B,ZNF772,L3MBTL3,MAPK7,AFF3,SIN3A,IMPACT,RPL11,RPS4X,APP,ATAD2,ZNF507,CELSR2,SP9,NFIA,KLF9,ZBTB18,TFE3,COA3,SMARCC2,DPF2,POLA1,INTS2,TACC1,EIF4B,ID4,ATP2B4,PHIP,SUMO1,PLPP3,D…
GO:BP	positive regulation of cellular component organization	GO:0051130	7.82929e-05	4.10628	1050	398	47	21092	CNTNAP2,PRKN,DCTN1,IGF1R,FER,LRP8,SMAD3,DMD,TENM1,CTNNB1,ROBO2,ARRB1,CUX1,HNRNPK,XRCC5,DAB2,STMP1,COBL,SIN3A,APP,CDKL5,KDR,PHIP,SUMO1,TRIM28,CCT3,RAD21,MARK4,NLGN1,SLF2,EFNA5,SEMA5A,PLXNA4,NTRK3,DDX3X,MAP2K1,BMPR2,CKAP5,BBC3,CCP110,DYNC1H1,HSPA5,TSG101,MAPRE1,RAB3GAP2,CREB3L2,TRIM67
GO:BP	forebrain development	GO:0030900	7.83293e-05	4.10608	394	398	26	21092	CNTNAP2,IGF1R,LRP8,DMD,CTNNB1,DLC1,SOX2,ROBO2,PRKG1,RBPJ,HES5,PPP1R9B,HDAC1,SIN3A,APP,FBXO45,TACC1,ID4,ATP2B4,BCL11B,HOOK3,SEMA5A,CDK6,PLXNA4,DLX1,PCSK1
GO:BP	aromatic compound biosynthetic process	GO:0019438	8.22696e-05	4.08476	4133	398	123	21092	PRKAG2,DLD,PRKN,FER,LRP8,SMAD3,IMPDH2,PAPSS2,DMD,TRPS1,SOX6,TENM1,CTNNB1,SOX2,NCOA3,SF1,POLR2A,KMT2D,ARRB1,SALL3,CKS1B,TIAL1,CUX1,HNRNPK,HSF2,DDX17,XRCC5,DAB2,RBPJ,HES5,GTF3C3,SRA1,SMARCA2,NDUFA12,NR1D1,ELP4,NADK2,HDAC1,ZNF772,L3MBTL3,MAPK7,AFF3,SIN3A,IMPACT,APP,ATAD2,ZNF507,CELSR2,SP9,NFIA,KLF9,ZBTB18,TFE3,SMARCC2,DPF2,POLA1,INTS2,TACC1,ID4,ATP2B4,PHIP,SUMO1,PLPP3,DLX6,TRIM28,KMT2A,CCT3,RAD21,PK…
GO:BP	regulation of protein localization	GO:0032880	8.38516e-05	4.07649	850	398	41	21092	PTPN11,PRKN,NDUFAF2,SMAD3,TENM1,CTNNB1,RDX,DNAJB2,DAB2,CACNG2,NR1D1,PPP1R9B,CLTC,STX8,ERLEC1,SIN3A,CELSR2,ATP2B4,SUMO1,AKAP5,GPC6,TRIM28,CCT3,PKIA,AAK1,DERL2,MARK4,XPO4,WNK3,EFNA5,TTBK2,BBC3,PCSK1,PID1,GAPVD1,PTPN9,MMP14,TSG101,UFL1,TRIM67,KLF7
GO:BP	multicellular organismal process	GO:0032501	8.54717e-05	4.06818	7463	398	193	21092	CNTNAP2,C1GALT1,PTPN11,DLD,ANKH,PRKN,DCTN1,PTCH2,IGF1R,F8,FER,LRP8,SCN1A,SMAD3,IMPDH2,PAPSS2,DMD,ITGA7,TRPS1,ABHD2,GRM1,TRIOBP,SOX6,TENM1,CTNNB1,DIAPH1,DLC1,SOX2,NCOA3,TTLL5,INHA,NEBL,SF1,ROBO2,KMT2D,ARRB1,CDC25B,TIAL1,CUX1,HNRNPK,HSF2,BICC1,XRCC5,FZD8,PRKG1,DAB2,AFF4,RBPJ,HES5,STMP1,CACNG2,SMARCA2,KLHL3,NDUFA12,GABRA4,SLIT3,NR1D1,POGLUT1,PPP1R9B,TUBB2A,HDAC1,PREX2,CLTC,GRIA1,PPIP5K2,COBL,L3MBTL3…
GO:BP	neuron projection morphogenesis	GO:0048812	0.000100382	3.99834	632	398	34	21092	CNTNAP2,PTPN11,PRKN,IGF1R,LRP8,DMD,CTNNB1,ROBO2,CUX1,SLIT3,PREX2,COBL,SIN3A,IMPACT,APP,FBXO45,CELSR2,CDKL5,NRXN3,RIMS2,GAP43,STXBP1,BCL11B,USP9X,NLGN1,EFNA5,SEMA5A,PLXNA4,EPHA7,MAP2K1,BMPR2,RAB10,KLF7,EPHB4
GO:BP	protein phosphorylation	GO:0006468	0.000105405	3.97714	1567	398	61	21092	PTPN11,PRKAG2,PRKN,IGF1R,FER,LRP8,CSNK2A1,DMD,TENM1,INHA,ARRB1,CKS1B,CDC25B,XRCC5,FZD8,PRKG1,DAB2,HES5,KLHL3,PPP1R9B,MAPK7,IMPACT,APP,CDKL5,ATP2B4,CCND2,CSPG4,DUSP6,KDR,PHIP,PLPP3,LCP2,TRIM28,PKIA,DAZAP2,AAK1,AIDA,MARK4,CLK1,WNK3,LMTK3,EFNA5,CDK6,TTBK2,NTRK3,EPHA7,DDX3X,NDUFS4,MAP2K1,BMPR2,STK4,PID1,RSRC1,ITGA5,GMFB,FXR2,UBE2K,TSG101,IPO7,PPME1,EPHB4
GO:BP	negative regulation of nitrogen compound metabolic process	GO:0051172	0.000108527	3.96446	2392	398	82	21092	PRKAG2,PRKN,CSNK2A1,SMAD3,DMD,TRPS1,SOX6,CTNNB1,SOX2,SF1,ARRB1,CUX1,DNAJB2,HNRNPK,XRCC5,DAB2,RBPJ,HES5,SMARCA2,NR1D1,PPP1R9B,HDAC1,CLTC,L3MBTL3,SIN3A,IMPACT,POR,RPL11,APP,ZBTB18,SMARCC2,DPF2,ID4,ATP2B4,DUSP6,SUMO1,PLPP3,TRIM28,KMT2A,SPON1,PKIA,ZFP36L2,STRAP,AATF,AIDA,FMN2,USP9X,ZNF79,TNRC6C,CDK6,CPEB3,USP2,NTRK3,ZFP90,DDX3X,MLH1,FHIT,DLX1,BMPR2,CHD4,FTO,PID1,SAMD4A,EIF4E2,SNAI2,ZNF134,FXR2,ZMPSTE…
GO:BP	cell part morphogenesis	GO:0032990	0.00013487	3.87008	671	398	35	21092	CNTNAP2,PTPN11,PRKN,IGF1R,LRP8,DMD,CTNNB1,ROBO2,CUX1,SLIT3,PREX2,COBL,SIN3A,IMPACT,APP,FBXO45,CELSR2,CDKL5,NRXN3,RIMS2,GAP43,STXBP1,BCL11B,USP9X,NLGN1,EFNA5,SEMA5A,PLXNA4,EPHA7,MAP2K1,BMPR2,PID1,RAB10,KLF7,EPHB4
GO:BP	regulation of protein modification process	GO:0031399	0.000150158	3.82345	1545	398	60	21092	PTPN11,PRKAG2,PRKN,FER,LRP8,UBQLN1,DMD,TENM1,CTNNB1,DLC1,INHA,FBXO33,ARRB1,CKS1B,CDC25B,DNAJB2,XRCC5,FZD8,DAB2,HES5,PPP1R9B,SIN3A,IMPACT,RPL11,APP,ATP2B4,CCND2,CSPG4,DUSP6,KDR,PHIP,PLPP3,LCP2,KMT2A,PKIA,DAZAP2,AIDA,WNK3,EFNA5,NTRK3,EPHA7,DDX3X,NDUFS4,MAP2K1,BMPR2,STK4,PID1,ITGA5,SNAI2,FXR2,UBE2K,HSPA5,ZMPSTE24,TSG101,IPO7,RAB3GAP2,PPP1R8,UFL1,PIAS1,DCUN1D1
GO:BP	cell projection organization	GO:0030030	0.000168127	3.77436	1550	398	60	21092	CNTNAP2,PTPN11,PRKN,DCTN1,IGF1R,FER,LRP8,DMD,TRIOBP,TENM1,CTNNB1,RDX,ROBO2,CUX1,PRKG1,DAB2,HES5,SLIT3,PPP1R9B,PREX2,COBL,SIN3A,IMPACT,APP,FBXO45,CELSR2,CDKL5,NRXN3,FGD4,RIMS2,CSPG4,GAP43,STXBP1,CAPZB,BCL11B,MARK4,USP9X,NLGN1,EFNA5,SEMA5A,PLXNA4,CFAP70,CPEB3,TTBK2,NTRK3,EPHA7,MAP2K1,BMPR2,CCP110,PTPN9,FXR2,HSPA5,MAPRE1,RAB10,FGD6,ACTL6B,CREB3L2,TRIM67,KLF7,EPHB4
GO:BP	plasma membrane bounded cell projection morphogenesis	GO:0120039	0.000175862	3.75483	647	398	34	21092	CNTNAP2,PTPN11,PRKN,IGF1R,LRP8,DMD,CTNNB1,ROBO2,CUX1,SLIT3,PREX2,COBL,SIN3A,IMPACT,APP,FBXO45,CELSR2,CDKL5,NRXN3,RIMS2,GAP43,STXBP1,BCL11B,USP9X,NLGN1,EFNA5,SEMA5A,PLXNA4,EPHA7,MAP2K1,BMPR2,RAB10,KLF7,EPHB4
GO:BP	cell projection morphogenesis	GO:0048858	0.000211086	3.67554	652	398	34	21092	CNTNAP2,PTPN11,PRKN,IGF1R,LRP8,DMD,CTNNB1,ROBO2,CUX1,SLIT3,PREX2,COBL,SIN3A,IMPACT,APP,FBXO45,CELSR2,CDKL5,NRXN3,RIMS2,GAP43,STXBP1,BCL11B,USP9X,NLGN1,EFNA5,SEMA5A,PLXNA4,EPHA7,MAP2K1,BMPR2,RAB10,KLF7,EPHB4
GO:BP	cell population proliferation	GO:0008283	0.000220722	3.65615	1988	398	71	21092	CNTNAP2,IGF1R,FER,CSNK2A1,SMAD3,IMPDH2,DMD,TENM1,CTNNB1,DLC1,SOX2,INHA,SF1,KMT2D,CKS1B,CDC25B,TIAL1,DNAJB2,XRCC5,PRKG1,DAB2,RBPJ,HES5,RBM5,SMARCA2,SLIT3,NR1D1,PPP1R9B,HDAC1,POR,RPS4X,APP,KLF9,TACC1,ID4,CCND2,KDR,PHIP,SQLE,DLX6,KMT2A,MMP16,DERL2,BCL11B,HOOK3,COL18A1,FAM98B,SEMA5A,CDK6,NTRK3,NDUFS4,MAP2K1,BMPR2,STK4,SSBP3,FTO,PID1,NRAS,HTRA1,SNAI2,MMP14,ZMPSTE24,TSG101,SOS2,PPP1R8,UFL1,SYF2,RAB10,P…
GO:BP	cellular response to endogenous stimulus	GO:0071495	0.000276131	3.55888	1348	398	54	21092	PTPN11,PRKN,IGF1R,FER,SMAD3,ABHD2,SOX6,CTNNB1,DIAPH1,NCOA3,RDX,ROBO2,KMT2D,DDX17,DAB2,RBPJ,HES5,SRA1,SLIT3,NR1D1,PPP1R9B,AHCYL1,HDAC1,MAPK7,SIN3A,IMPACT,POR,APP,KLF9,ATP2B4,KDR,PHIP,ZFP36L2,STRAP,USP9X,ATP1A1,EFNA5,CPEB3,NTRK3,PEG10,DLX1,BMPR2,PID1,HTRA1,SNAI2,HSPA5,ZMPSTE24,UFL1,RAB10,HCN1,RRAGC,SOGA1,GABRG2,SORT1
GO:BP	regulation of cellular localization	GO:0060341	0.000298469	3.5251	959	398	43	21092	PTPN11,PRKN,NDUFAF2,SMAD3,TENM1,CTNNB1,RDX,DNAJB2,DAB2,CACNG2,NR1D1,PPP1R9B,CLTC,STX8,ERLEC1,SIN3A,CELSR2,ATP2B4,SUMO1,AKAP5,GPC6,TRIM28,CCT3,PKIA,AAK1,DERL2,MARK4,XPO4,WNK3,EFNA5,TTBK2,MAP2K1,BBC3,PCSK1,PID1,GAPVD1,DYNC1H1,PTPN9,MMP14,TSG101,UFL1,TRIM67,KLF7
GO:BP	negative regulation of cellular metabolic process	GO:0031324	0.000318602	3.49675	2248	398	77	21092	PRKAG2,PRKN,CSNK2A1,SMAD3,DMD,TRPS1,SOX6,CTNNB1,SOX2,INHA,SF1,CUX1,HNRNPK,XRCC5,DAB2,RBPJ,HES5,SMARCA2,NR1D1,PPP1R9B,HDAC1,L3MBTL3,SIN3A,IMPACT,RPL11,ZBTB18,SMARCC2,DPF2,ID4,ATP2B4,DUSP6,SUMO1,PLPP3,TRIM28,KMT2A,SPON1,PKIA,ZFP36L2,STRAP,AATF,AIDA,USP9X,ZNF79,TNRC6C,ATP1A1,CDK6,CPEB3,USP2,NTRK3,ZFP90,DDX3X,MLH1,FHIT,DLX1,BMPR2,CHD4,FTO,PID1,SAMD4A,EIF4E2,SNAI2,ZNF134,FXR2,ZMPSTE24,TSG101,IPO7,PPP1…
GO:BP	positive regulation of nucleobase-containing compound metabolic process	GO:0045935	0.000326166	3.48656	2048	398	72	21092	PRKN,IGF1R,SMAD3,CTNNB1,SOX2,NCOA3,KMT2D,ARRB1,HNRNPK,HSF2,DDX17,XRCC5,DAB2,RBPJ,HES5,SRA1,SMARCA2,SF3B4,NR1D1,HDAC1,MAPK7,SIN3A,APP,ATAD2,ZNF507,NFIA,ZBTB18,TFE3,SMARCC2,DPF2,TACC1,ID4,PHIP,TRIM28,KMT2A,CCT3,ZFP36L2,AATF,BCL11B,ING3,BABAM2,FMN2,TCF20,USP9X,TNRC6C,KMT2C,ZNF225,SLF2,CPEB3,ZFP90,DDX3X,MLH1,MAP2K1,DLX1,BMPR2,CHD4,SSBP3,FTO,PID1,SAMD4A,SEC14L2,RFC3,HSPA5,TSG101,CHD6,ACTL6B,CREB3L2,NR…
GO:BP	negative regulation of biosynthetic process	GO:0009890	0.000332952	3.47762	1619	398	61	21092	PRKN,SMAD3,TRPS1,SOX6,CTNNB1,SOX2,SF1,CUX1,HNRNPK,XRCC5,DAB2,RBPJ,HES5,SMARCA2,NR1D1,HDAC1,CLTC,L3MBTL3,SIN3A,IMPACT,ZBTB18,SMARCC2,DPF2,ID4,ATP2B4,SUMO1,TRIM28,PKIA,ZFP36L2,STRAP,AATF,USP9X,ZNF79,TNRC6C,ATP1A1,CDK6,CPEB3,USP2,ZFP90,DDX3X,MLH1,DLX1,BMPR2,CHD4,FTO,PID1,SAMD4A,EIF4E2,SNAI2,ZNF134,FXR2,TSG101,PIAS1,SOGA1,E2F6,NR6A1,AEBP1,KLF7,KAT6A,ASXL3,COQ7
GO:BP	regulation of multicellular organismal development	GO:2000026	0.000341491	3.46662	1394	398	55	21092	PTPN11,ANKH,PTCH2,LRP8,SMAD3,TRPS1,SOX6,CTNNB1,NCOA3,INHA,ROBO2,CUX1,XRCC5,RBPJ,HES5,SMARCA2,NR1D1,POGLUT1,HDAC1,MAPK7,POR,TFE3,CDKL5,SMARCC2,ID4,ATP2B4,CTSC,DUSP6,KDR,ZFP36L2,HOOK3,NLGN1,HSPG2,EFNA5,SEMA5A,CDK6,PLXNA4,ADAM12,NTRK3,EPHA7,MAP2K1,DLX1,BMPR2,ECSCR,ITGA5,SNAI2,MMP14,ZMPSTE24,SOS2,UFL1,TENT5A,SH3RF1,ACTL6B,KLF7,KAT6A
GO:BP	regulation of response to stimulus	GO:0048583	0.000360776	3.44276	3970	398	117	21092	CACNB3,PTPN11,PRKN,NDUFAF2,PTCH2,IGF1R,FER,LRP8,UBQLN1,CSNK2A1,SMAD3,PPP2R1B,DMD,GRM1,TENM1,CTNNB1,DLC1,SOX2,NCOA3,INHA,RDX,ROBO2,KMT2D,ARRB1,TIAL1,HNRNPK,BICC1,XRCC5,FZD8,PRKG1,DAB2,RBPJ,HES5,CACNG2,SMARCA2,SLIT3,NR1D1,POGLUT1,PPP1R9B,HDAC1,PREX2,MAPK7,SIN3A,POR,RPL11,APP,GPR137C,MYO9B,ARHGEF40,SMARCC2,DPF2,FGD4,RIMS2,ATP2B4,CTSC,CSPG4,DUSP6,KDR,PHIP,STXBP1,PLPP3,AKAP5,LCP2,GPC6,ARHGAP29,TRIM28,…
GO:BP	peptidyl-amino acid modification	GO:0018193	0.000363064	3.44002	1286	398	52	21092	PTPN11,PRKAG2,IGF1R,FER,LRP8,GALNT2,CSNK2A1,DMD,TENM1,CTNNB1,NCOA3,TTLL5,KMT2D,ARRB1,HES5,POGLUT1,STT3B,MAPK7,SIN3A,POR,APP,EGFLAM,ZDHHC20,ATP2B4,CSPG4,KDR,SUMO1,PLPP3,TRIM28,KMT2A,ING3,CLK1,WNK3,KMT2C,LMTK3,SLF2,EFNA5,TTBK2,NTRK3,EPHA7,MAP2K1,STK4,CAMKMT,ITGA5,SNAI2,UBE2K,ZMPSTE24,TSG101,PIAS1,ACTL6B,EPHB4,KAT6A
GO:BP	phosphorylation	GO:0016310	0.000412112	3.38498	1862	398	67	21092	PTPN11,PRKAG2,PRKN,IGF1R,FER,LRP8,CSNK2A1,PAPSS2,DMD,TENM1,INHA,ARRB1,CKS1B,CDC25B,XRCC5,FZD8,PRKG1,DAB2,HES5,KLHL3,PPP1R9B,NADK2,PPIP5K2,MAPK7,IMPACT,APP,CDKL5,ATP2B4,CCND2,CSPG4,DUSP6,KDR,PHIP,PLPP3,LCP2,TRIM28,PKIA,DAZAP2,AAK1,AIDA,MARK4,CLK1,WNK3,LMTK3,EFNA5,CDK6,TTBK2,NTRK3,EPHA7,DDX3X,NDUFS4,MAP2K1,BMPR2,STK4,PID1,RSRC1,ITGA5,PGAM1,PGM1,GMFB,FXR2,UBE2K,TSG101,IPO7,PPME1,PI4K2A,EPHB4
GO:BP	regulation of cell cycle	GO:0051726	0.000415915	3.381	1111	398	47	21092	PTPN11,DCTN1,IGF1R,CSNK2A1,DMD,CTNNB1,SOX2,INHA,RDX,CKS1B,CDC25B,SRA1,SMARCA2,KCNH5,PPP1R9B,CLTC,KLHL9,SIN3A,APP,CDKL5,SMARCC2,DPF2,ATP2B4,CCND2,PHIP,RAD21,PKIA,ZFP36L2,AATF,HECA,ING3,MARK4,LSM11,BABAM2,TTC28,SLF2,CDK6,USP2,DDX3X,CCP110,DYNC1H1,ZMPSTE24,TSG101,IPO7,SYF2,WDR12,ACTL6B
GO:BP	cellular component morphogenesis	GO:0032989	0.000440623	3.35593	770	398	37	21092	CNTNAP2,PTPN11,PRKN,IGF1R,LRP8,DMD,CTNNB1,NEBL,ROBO2,CUX1,SLIT3,PREX2,COBL,SIN3A,IMPACT,APP,FBXO45,CELSR2,CDKL5,NRXN3,RIMS2,GAP43,STXBP1,BCL11B,USP9X,NEB,NLGN1,EFNA5,SEMA5A,PLXNA4,EPHA7,MAP2K1,BMPR2,PID1,RAB10,KLF7,EPHB4
GO:BP	positive regulation of biosynthetic process	GO:0009891	0.000484015	3.31514	2069	398	72	21092	PRKN,IGF1R,SMAD3,CTNNB1,SOX2,NCOA3,KMT2D,ARRB1,HNRNPK,HSF2,DDX17,XRCC5,DAB2,RBPJ,HES5,SRA1,SMARCA2,NR1D1,HDAC1,LARP1B,MAPK7,SIN3A,IMPACT,POR,RPS4X,APP,ATAD2,ZNF507,NFIA,ZBTB18,TFE3,COA3,SMARCC2,DPF2,TACC1,ID4,KDR,PHIP,TRIM28,KMT2A,CCT3,AATF,BCL11B,ING3,TCF20,KMT2C,ZNF225,LPGAT1,CPEB3,ZFP90,DDX3X,MAP2K1,DLX1,BMPR2,CHD4,SSBP3,PID1,SAMD4A,SEC14L2,RFC3,FXR2,HSPA5,TSG101,RAB3GAP2,CHD6,ACTL6B,CREB3L2,N…
GO:BP	positive regulation of cellular biosynthetic process	GO:0031328	0.000522258	3.28211	2033	398	71	21092	PRKN,IGF1R,SMAD3,CTNNB1,SOX2,NCOA3,KMT2D,ARRB1,HNRNPK,HSF2,DDX17,XRCC5,DAB2,RBPJ,HES5,SRA1,SMARCA2,NR1D1,HDAC1,LARP1B,MAPK7,SIN3A,IMPACT,POR,RPS4X,APP,ATAD2,ZNF507,NFIA,ZBTB18,TFE3,COA3,SMARCC2,DPF2,TACC1,ID4,PHIP,TRIM28,KMT2A,CCT3,AATF,BCL11B,ING3,TCF20,KMT2C,ZNF225,LPGAT1,CPEB3,ZFP90,DDX3X,MAP2K1,DLX1,BMPR2,CHD4,SSBP3,PID1,SAMD4A,SEC14L2,RFC3,FXR2,HSPA5,TSG101,RAB3GAP2,CHD6,ACTL6B,CREB3L2,NR6A1…
GO:BP	regulation of mitotic cell cycle	GO:0007346	0.000537977	3.26924	493	398	28	21092	PTPN11,CTNNB1,RDX,CKS1B,CDC25B,SRA1,SMARCA2,KCNH5,PPP1R9B,SIN3A,APP,SMARCC2,DPF2,CCND2,PHIP,RAD21,PKIA,ZFP36L2,AATF,HECA,LSM11,BABAM2,TTC28,USP2,DDX3X,ZMPSTE24,SYF2,ACTL6B
GO:BP	regulation of cell population proliferation	GO:0042127	0.00056954	3.24448	1683	398	62	21092	IGF1R,FER,CSNK2A1,SMAD3,DMD,TENM1,CTNNB1,DLC1,SOX2,INHA,SF1,KMT2D,CDC25B,TIAL1,DNAJB2,XRCC5,PRKG1,DAB2,RBPJ,HES5,RBM5,SMARCA2,SLIT3,NR1D1,PPP1R9B,HDAC1,POR,RPS4X,APP,KLF9,ID4,CCND2,KDR,PHIP,SQLE,DLX6,KMT2A,DERL2,BCL11B,COL18A1,FAM98B,SEMA5A,CDK6,NTRK3,NDUFS4,MAP2K1,BMPR2,STK4,SSBP3,FTO,PID1,NRAS,HTRA1,SNAI2,ZMPSTE24,TSG101,SOS2,UFL1,SYF2,PIAS1,SH3RF1,ACTL6B
GO:BP	positive regulation of macromolecule biosynthetic process	GO:0010557	0.000650409	3.18681	1925	398	68	21092	PRKN,SMAD3,CTNNB1,SOX2,NCOA3,KMT2D,ARRB1,HNRNPK,HSF2,DDX17,XRCC5,DAB2,RBPJ,HES5,SRA1,SMARCA2,NR1D1,HDAC1,LARP1B,MAPK7,SIN3A,IMPACT,RPS4X,APP,ATAD2,ZNF507,NFIA,ZBTB18,TFE3,COA3,SMARCC2,DPF2,TACC1,ID4,KDR,PHIP,TRIM28,KMT2A,CCT3,AATF,BCL11B,ING3,TCF20,KMT2C,ZNF225,CPEB3,ZFP90,DDX3X,MAP2K1,DLX1,BMPR2,CHD4,SSBP3,PID1,SAMD4A,SEC14L2,RFC3,FXR2,HSPA5,TSG101,CHD6,ACTL6B,CREB3L2,NR6A1,KLF7,KAT6A,ASXL3,COQ7
GO:BP	protein localization	GO:0008104	0.000653405	3.18482	2704	398	87	21092	CACNB3,CNTNAP2,PTPN11,PRKN,PEX3,NDUFAF2,SMAD3,DMD,TENM1,CTNNB1,DIAPH1,RDX,COG4,ARRB1,DNAJB2,XRCC5,DAB2,CACNG2,NR1D1,PPP1R9B,AHCYL1,CLTC,STX8,ERLEC1,SIN3A,RPL11,CELSR2,DOP1B,ZDHHC20,RIMS2,ID4,ATP2B4,HSPA4,STXBP1,SUMO1,AKAP5,PIGK,GPC6,TRIM28,CCT3,RAD21,LMAN2,PKIA,SRP68,AAK1,NUP205,NBEA,DERL2,IPO9,MARK4,HOOK3,STX12,FMN2,XPO4,DCTN2,USP9X,WNK3,NLGN1,SLF2,EFNA5,TTBK2,DDX3X,BBC3,STK4,PCSK1,PID1,GAPVD1,A…
GO:BP	regulation of localization	GO:0032879	0.000699675	3.1551	2089	398	72	21092	CACNB3,PTPN11,PRKAG2,PRKN,NDUFAF2,FER,UBQLN1,SCN1A,SMAD3,DMD,TENM1,CTNNB1,DIAPH1,INHA,RDX,ARRB1,DNAJB2,HNRNPK,DAB2,CACNG2,NR1D1,KCNH5,PPP1R9B,AHCYL1,CLTC,STX8,ERLEC1,SIN3A,APP,CELSR2,NRXN3,RIMS2,ATP2B4,STXBP1,SUMO1,AKAP5,GPC6,TRIM28,KMT2A,CCT3,LMAN2,PKIA,SYN1,CLIC4,AAK1,DERL2,MARK4,XPO4,WNK3,NLGN1,ATP1A1,CACNA1E,EFNA5,TTBK2,MAP2K1,BBC3,KCNA4,PCSK1,FTO,PID1,GAPVD1,DYNC1H1,PTPN9,SYNGR3,MMP14,TSG101…
GO:BP	cellular macromolecule localization	GO:0070727	0.000754706	3.12222	2713	398	87	21092	CACNB3,CNTNAP2,PTPN11,PRKN,PEX3,NDUFAF2,SMAD3,DMD,TENM1,CTNNB1,DIAPH1,RDX,COG4,ARRB1,DNAJB2,XRCC5,DAB2,CACNG2,NR1D1,PPP1R9B,AHCYL1,CLTC,STX8,ERLEC1,SIN3A,RPL11,CELSR2,DOP1B,ZDHHC20,RIMS2,ID4,ATP2B4,HSPA4,STXBP1,SUMO1,AKAP5,PIGK,GPC6,TRIM28,CCT3,RAD21,LMAN2,PKIA,SRP68,AAK1,NUP205,NBEA,DERL2,IPO9,MARK4,HOOK3,STX12,FMN2,XPO4,DCTN2,USP9X,WNK3,NLGN1,SLF2,EFNA5,TTBK2,DDX3X,BBC3,STK4,PCSK1,PID1,GAPVD1,A…
GO:BP	regulation of molecular function	GO:0065009	0.000763906	3.11696	3055	398	95	21092	CACNB3,PRKAG2,PRKN,IGF1R,FER,LRP8,UBQLN1,CSNK2A1,SMAD3,PPP2R1B,DMD,TENM1,CTNNB1,DLC1,SOX2,NCOA3,RDX,ARRB1,CKS1B,CDC25B,DNAJB2,HNRNPK,XRCC5,FZD8,PRKG1,DAB2,RCAN2,CACNG2,ELP4,PPP1R9B,AHCYL1,HDAC1,PREX2,MAPK7,SIN3A,POR,RPL11,APP,MYO9B,ARHGEF40,CDKL5,FGD4,ATP2B4,CCND2,KDR,SUMO1,PLPP3,AKAP5,LCP2,ARHGAP29,TRIM28,KMT2A,MMP16,SPON1,PKIA,DAZAP2,AIDA,USP9X,WNK3,NLGN1,EFNA5,PLXNA4,TTBK2,NTRK3,ZFP90,RALGAPA2…
GO:BP	regulation of cell differentiation	GO:0045595	0.000857165	3.06694	1587	398	59	21092	PTPN11,PTCH2,LRP8,SMAD3,DMD,TRPS1,TRIOBP,SOX6,CTNNB1,SOX2,NCOA3,INHA,ROBO2,CUX1,DDX17,XRCC5,DAB2,RBPJ,HES5,SRA1,SMARCA2,NR1D1,HDAC1,SIN3A,IMPACT,POR,APP,TFE3,CDKL5,SMARCC2,DPF2,ID4,KDR,ZFP36L2,BCL11B,TLX3,HOOK3,NLGN1,EFNA5,SEMA5A,CDK6,PLXNA4,NTRK3,EPHA7,MAP2K1,DLX1,BMPR2,STK4,CHD4,FTO,SNAI2,MMP14,SOS2,UFL1,TENT5A,SH3RF1,ACTL6B,SORT1,KLF7
GO:BP	negative regulation of cellular biosynthetic process	GO:0031327	0.000893692	3.04881	1589	398	59	21092	PRKN,SMAD3,TRPS1,SOX6,CTNNB1,SOX2,SF1,CUX1,HNRNPK,XRCC5,DAB2,RBPJ,HES5,SMARCA2,NR1D1,HDAC1,L3MBTL3,SIN3A,IMPACT,ZBTB18,SMARCC2,DPF2,ID4,ATP2B4,SUMO1,TRIM28,PKIA,ZFP36L2,STRAP,AATF,USP9X,ZNF79,TNRC6C,ATP1A1,CDK6,CPEB3,USP2,ZFP90,DDX3X,MLH1,DLX1,BMPR2,CHD4,FTO,PID1,SAMD4A,EIF4E2,SNAI2,ZNF134,FXR2,TSG101,PIAS1,SOGA1,E2F6,NR6A1,AEBP1,KLF7,KAT6A,COQ7
GO:BP	growth	GO:0040007	0.00112597	2.94847	972	398	42	21092	PTPN11,PRKN,PTCH2,CSNK2A1,SMAD3,DMD,CTNNB1,SOX2,KMT2D,DNAJB2,DAB2,RBPJ,SMARCA2,SLIT3,PPP1R9B,COBL,SIN3A,IMPACT,POR,APP,CDKL5,RIMS2,DUSP6,GAP43,TRIM28,CLIC4,DERL2,ING3,USP9X,EFNA5,SEMA5A,PLXNA4,EPHA7,DDX3X,BMPR2,BBC3,STK4,RASAL2,FTO,MMP14,ZMPSTE24,TSG101
GO:BP	regulation of membrane potential	GO:0042391	0.00120432	2.91926	424	398	25	21092	CACNB3,DLD,PRKN,GRIA3,SCN1A,DMD,GRM1,KCNK9,CACNG2,GABRA4,KCNH5,GRIA1,APP,RIMS2,KDR,SUMO1,KMT2A,INSYN2A,NLGN1,ATP1A1,PID1,ZMPSTE24,HCN1,GABRG2,KCNA2
GO:BP	mitotic cell cycle process	GO:1903047	0.0012069	2.91833	769	398	36	21092	DCTN1,RDX,CKS1B,CDC25B,SMARCA2,KCNH5,PPP1R9B,CLTC,SIN3A,APP,KIF2A,SMARCC2,DPF2,POLA1,TACC1,ID4,CCND2,PHIP,RAD21,PKIA,ZFP36L2,LSM11,BABAM2,DCTN2,SLF2,CDK6,DDX3X,CKAP5,DYNC1H1,ZMPSTE24,DCTN6,MAPRE1,SYF2,PPME1,E2F6,ACTL6B
GO:BP	cell junction organization	GO:0034330	0.00121095	2.91688	703	398	34	21092	CACNB3,CNTNAP2,DCTN1,IGF1R,FER,LRP8,SMAD3,CTNNB1,DLC1,RDX,ROBO2,DST,CACNG2,APP,FBXO45,NFIA,CDKL5,NRXN3,GAP43,KDR,GPC6,SYN1,PCDHB5,NLGN1,CDH24,ADGRL3,EFNA5,NTRK3,EPHA7,CHD4,ITGA5,SNAI2,MMP14,GABRG2
GO:BP	positive regulation of protein modification process	GO:0031401	0.00121323	2.91606	1010	398	43	21092	PTPN11,PRKAG2,PRKN,LRP8,UBQLN1,TENM1,CTNNB1,DLC1,INHA,FBXO33,ARRB1,CKS1B,CDC25B,DNAJB2,XRCC5,FZD8,DAB2,HES5,APP,ATP2B4,CCND2,CSPG4,KDR,PLPP3,LCP2,KMT2A,DAZAP2,WNK3,EFNA5,NTRK3,EPHA7,DDX3X,MAP2K1,BMPR2,STK4,ITGA5,SNAI2,FXR2,UBE2K,HSPA5,RAB3GAP2,PIAS1,DCUN1D1
GO:BP	cellular macromolecule metabolic process	GO:0044260	0.00156196	2.80633	3234	398	98	21092	C1GALT1,PRKAG2,PRKN,IGF1R,UBQLN1,GALNT2,CSNK2A1,DMD,CTNNB1,INHA,FBXO33,KMT2D,ARRB1,DNAJB2,XRCC5,DAB2,SMARCA2,KLHL3,KIN,NR1D1,ELP4,POGLUT1,STT3B,LARP1B,ERLEC1,SIN3A,IMPACT,RPL11,RPS4X,APP,FBXO45,NFIA,EGFLAM,COA3,ZDHHC20,SMARCC2,DPF2,POLA1,EIF4B,PSMD11,SUMO1,PIGK,TRIM28,KMT2A,CCT3,RAD21,ZFP36L2,AATF,HS2ST1,EDC4,DERL2,PNRC2,UBE2W,BCL11B,ING3,CHST7,GALNT17,MRPL32,DTD1,OTUD7A,FAM98B,BABAM2,FMN2,USP9X,…
GO:BP	cellular response to stimulus	GO:0051716	0.00175571	2.75555	7494	398	188	21092	CACNB3,PTPN11,PRKAG2,PRKN,NDUFAF2,PTCH2,GRIA3,IGF1R,FER,LRP8,UBQLN1,CSNK2A1,SMAD3,IMPDH2,PPP2R1B,DMD,ITGA7,RAB33A,ABHD2,GRM1,SOX6,TENM1,CTNNB1,DIAPH1,DLC1,SOX2,NCOA3,INHA,RDX,ROBO2,POLR2A,KMT2D,ARRB1,TIAL1,DST,DNAJB2,HNRNPK,DDX17,BICC1,XRCC5,FZD8,PRKG1,DAB2,RBPJ,HES5,RCAN2,SRA1,CACNG2,SMARCA2,GABRA4,KIN,SLIT3,NR1D1,POGLUT1,STT3B,PPP1R9B,PLCB4,AHCYL1,HDAC1,PREX2,GRIA1,STX8,ERLEC1,MAPK7,SIN3A,IMPAC…
GO:BP	regulation of gene expression	GO:0010468	0.00191658	2.71747	5494	398	147	21092	PTPN11,PRKN,FER,LRP8,SMAD3,DMD,TRPS1,SOX6,TENM1,CTNNB1,SOX2,NCOA3,INHA,SF1,RDX,KMT2D,ARRB1,SALL3,CKS1B,TIAL1,CUX1,HNRNPK,HSF2,DDX17,XRCC5,DAB2,AFF4,RBPJ,HES5,STMP1,RBM5,SRA1,SMARCA2,SF3B4,SLIT3,NR1D1,ELP4,PTRH2,HDAC1,LARP1B,ZNF772,L3MBTL3,MAPK7,AFF3,SIN3A,IMPACT,RPL11,RPS4X,APP,ATAD2,ZNF507,CELSR2,SP9,NFIA,KLF9,ZBTB18,TFE3,COA3,SMARCC2,DPF2,POLA1,INTS2,TACC1,EIF4B,ID4,ATP2B4,KDR,PHIP,SUMO1,PLPP3,…
GO:BP	regulation of ubiquitin-dependent protein catabolic process	GO:2000058	0.00192316	2.71598	171	398	15	21092	PRKN,UBQLN1,CSNK2A1,DNAJB2,DAB2,RPL11,SUMO1,USP9X,FHIT,UBE2K,CCDC22,UFL1,PIAS1,SH3RF1,TRIM67
GO:BP	cell growth	GO:0016049	0.00209184	2.67947	497	398	27	21092	PRKN,PTCH2,CSNK2A1,SMAD3,CTNNB1,KMT2D,DNAJB2,DAB2,SMARCA2,SLIT3,PPP1R9B,COBL,SIN3A,IMPACT,APP,CDKL5,RIMS2,DERL2,USP9X,EFNA5,SEMA5A,PLXNA4,EPHA7,DDX3X,BMPR2,MMP14,TSG101
GO:BP	cell cycle	GO:0007049	0.00233637	2.63146	1794	398	63	21092	PTPN11,DCTN1,IGF1R,CSNK2A1,DMD,TRIOBP,CTNNB1,SOX2,INHA,RDX,CKS1B,CDC25B,SRA1,SMARCA2,KCNH5,PPP1R9B,TUBB2A,CLTC,KLHL9,MAPK7,SIN3A,APP,KIF2A,CDKL5,SMARCC2,DPF2,POLA1,TACC1,ID4,ATP2B4,CCND2,PHIP,RAD21,PKIA,ZFP36L2,AATF,HECA,ING3,MARK4,LSM11,BABAM2,FMN2,DCTN2,USP9X,TTC28,SLF2,CDK6,USP2,DDX3X,MLH1,CKAP5,CCP110,DYNC1H1,ZMPSTE24,TSG101,IPO7,DCTN6,MAPRE1,SYF2,PPME1,WDR12,E2F6,ACTL6B
GO:BP	positive regulation of RNA metabolic process	GO:0051254	0.00271923	2.56555	1842	398	64	21092	PRKN,SMAD3,CTNNB1,SOX2,NCOA3,KMT2D,ARRB1,HNRNPK,HSF2,DDX17,DAB2,RBPJ,HES5,SRA1,SMARCA2,SF3B4,NR1D1,HDAC1,MAPK7,SIN3A,APP,ATAD2,ZNF507,NFIA,ZBTB18,TFE3,SMARCC2,DPF2,TACC1,ID4,PHIP,TRIM28,KMT2A,ZFP36L2,AATF,BCL11B,ING3,TCF20,TNRC6C,KMT2C,ZNF225,CPEB3,ZFP90,DDX3X,MLH1,MAP2K1,DLX1,BMPR2,CHD4,SSBP3,FTO,PID1,SAMD4A,SEC14L2,HSPA5,TSG101,CHD6,ACTL6B,CREB3L2,NR6A1,KLF7,KAT6A,ASXL3,COQ7
GO:BP	negative regulation of macromolecule biosynthetic process	GO:0010558	0.00286474	2.54292	1530	398	56	21092	PRKN,SMAD3,TRPS1,SOX6,CTNNB1,SOX2,SF1,CUX1,HNRNPK,XRCC5,DAB2,RBPJ,HES5,SMARCA2,NR1D1,HDAC1,CLTC,L3MBTL3,SIN3A,IMPACT,ZBTB18,SMARCC2,DPF2,ID4,SUMO1,TRIM28,PKIA,ZFP36L2,STRAP,AATF,USP9X,ZNF79,TNRC6C,CDK6,CPEB3,USP2,ZFP90,DDX3X,MLH1,DLX1,BMPR2,CHD4,FTO,SAMD4A,EIF4E2,SNAI2,ZNF134,FXR2,TSG101,PIAS1,E2F6,NR6A1,AEBP1,KLF7,KAT6A,COQ7
GO:BP	regulation of biological quality	GO:0065008	0.0030394	2.51721	3726	398	108	21092	CACNB3,PTPN11,DLD,ANKH,PRKN,DCTN1,NDUFAF2,GRIA3,IGF1R,F8,FER,LRP8,SCN1A,SMAD3,PAPSS2,DMD,GRM1,KCNK9,TRIOBP,TENM1,CTNNB1,DIAPH1,INHA,RDX,ROBO2,DNAJB2,PRKG1,DAB2,RBPJ,CACNG2,KLHL3,GABRA4,NR1D1,KCNH5,ATP6V0A1,GRIA1,L3MBTL3,SIN3A,POR,RPL11,APP,LRRC8D,CELSR2,TFE3,CDKL5,NRXN3,ATP2B2,RIMS2,ATP2B4,KDR,STXBP1,TPP2,SUMO1,PLPP3,AKAP5,CAPZB,GPC6,KMT2A,CCT3,ZFP36L2,SYN1,STRAP,CLIC4,AAK1,NBEA,ABHD8,DTD1,STX12,…
GO:BP	cell morphogenesis involved in differentiation	GO:0000904	0.00309243	2.5097	733	398	34	21092	PTPN11,IGF1R,FER,LRP8,TRIOBP,CTNNB1,ROBO2,CUX1,DAB2,SLIT3,PREX2,COBL,SIN3A,APP,FBXO45,CELSR2,CDKL5,NRXN3,GAP43,STXBP1,CLIC4,BCL11B,COL18A1,USP9X,NLGN1,EFNA5,SEMA5A,PLXNA4,EPHA7,MAP2K1,BMPR2,RAB10,KLF7,EPHB4
GO:BP	response to growth factor	GO:0070848	0.0033254	2.47816	702	398	33	21092	PTPN11,IGF1R,FER,LRP8,SMAD3,DMD,SOX6,CTNNB1,SOX2,RDX,DAB2,RBPJ,HES5,PPP1R9B,HDAC1,MAPK7,SIN3A,APP,ATP2B4,DUSP6,KDR,ZFP36L2,STRAP,USP9X,NTRK3,PEG10,DLX1,BMPR2,ITGA5,HTRA1,SNAI2,HSPA5,SORT1
GO:BP	cell morphogenesis involved in neuron differentiation	GO:0048667	0.00345183	2.46195	573	398	29	21092	PTPN11,IGF1R,LRP8,TRIOBP,ROBO2,CUX1,SLIT3,PREX2,COBL,SIN3A,APP,FBXO45,CELSR2,CDKL5,NRXN3,GAP43,STXBP1,BCL11B,USP9X,NLGN1,EFNA5,SEMA5A,PLXNA4,EPHA7,MAP2K1,BMPR2,RAB10,KLF7,EPHB4
GO:BP	regulation of proteolysis involved in protein catabolic process	GO:1903050	0.00378524	2.42191	229	398	17	21092	PRKN,UBQLN1,CSNK2A1,DNAJB2,DAB2,RPL11,CTSC,SUMO1,USP9X,FHIT,ECSCR,UBE2K,CCDC22,UFL1,PIAS1,SH3RF1,TRIM67
GO:BP	negative regulation of cell communication	GO:0010648	0.00380251	2.41993	1352	398	51	21092	PTPN11,PRKN,NDUFAF2,PTCH2,IGF1R,UBQLN1,CSNK2A1,DMD,CTNNB1,DLC1,SOX2,INHA,ARRB1,BICC1,DAB2,SLIT3,NR1D1,HDAC1,GRIA1,MAPK7,SIN3A,ATP2B4,DUSP6,PHIP,STXBP1,STRAP,AATF,AIDA,OTUD7A,INVS,RNF152,PEG10,DDX3X,DLX1,STK4,SH2D1A,PID1,HTRA1,SNAI2,MMP14,HSPA5,TSG101,CCDC22,UFL1,SAMHD1,SH3RF1,HCN1,PHLPP1,TRIM67,KLF7,AMER2
GO:BP	regulation of protein phosphorylation	GO:0001932	0.00414447	2.38253	1095	398	44	21092	PTPN11,PRKAG2,PRKN,FER,LRP8,DMD,TENM1,INHA,ARRB1,CKS1B,CDC25B,XRCC5,FZD8,DAB2,HES5,PPP1R9B,IMPACT,APP,ATP2B4,CCND2,CSPG4,DUSP6,KDR,PHIP,PLPP3,LCP2,PKIA,DAZAP2,AIDA,WNK3,EFNA5,NTRK3,EPHA7,DDX3X,NDUFS4,MAP2K1,BMPR2,STK4,PID1,ITGA5,FXR2,UBE2K,TSG101,IPO7
GO:BP	cellular macromolecule catabolic process	GO:0044265	0.00420306	2.37643	1023	398	42	21092	PRKN,UBQLN1,CSNK2A1,CTNNB1,FBXO33,ARRB1,DNAJB2,DAB2,KLHL3,STT3B,ERLEC1,RPL11,FBXO45,PSMD11,SUMO1,ZFP36L2,EDC4,DERL2,PNRC2,UBE2W,OTUD7A,USP9X,TNRC6C,CPEB3,USP2,MLH1,FHIT,SPOP,FTO,SAMD4A,FXR2,UBE2K,HSPA5,ZMPSTE24,TSG101,CCDC22,PPP1R8,UFL1,PIAS1,TENT5A,SH3RF1,TRIM67
GO:BP	negative regulation of signaling	GO:0023057	0.00422891	2.37377	1357	398	51	21092	PTPN11,PRKN,NDUFAF2,PTCH2,IGF1R,UBQLN1,CSNK2A1,DMD,CTNNB1,DLC1,SOX2,INHA,ARRB1,BICC1,DAB2,SLIT3,NR1D1,HDAC1,GRIA1,MAPK7,SIN3A,ATP2B4,DUSP6,PHIP,STXBP1,STRAP,AATF,AIDA,OTUD7A,INVS,RNF152,PEG10,DDX3X,DLX1,STK4,SH2D1A,PID1,HTRA1,SNAI2,MMP14,HSPA5,TSG101,CCDC22,UFL1,SAMHD1,SH3RF1,HCN1,PHLPP1,TRIM67,KLF7,AMER2
GO:BP	regulation of cell cycle process	GO:0010564	0.00451241	2.34559	712	398	33	21092	PTPN11,DCTN1,IGF1R,CSNK2A1,CTNNB1,SOX2,RDX,CDC25B,SMARCA2,KCNH5,PPP1R9B,CLTC,KLHL9,SIN3A,APP,SMARCC2,DPF2,ATP2B4,CCND2,PHIP,RAD21,PKIA,ZFP36L2,MARK4,LSM11,BABAM2,SLF2,DDX3X,CCP110,DYNC1H1,ZMPSTE24,SYF2,ACTL6B
GO:BP	regulation of anatomical structure morphogenesis	GO:0022603	0.0045468	2.34229	919	398	39	21092	PRKN,LRP8,ITGA7,TRIOBP,CTNNB1,DIAPH1,DLC1,RDX,ROBO2,CUX1,DAB2,POGLUT1,MAPK7,BTBD7,CELSR2,CDKL5,FGD4,RIMS2,ATP2B4,KDR,PHIP,CAPZB,GPC6,TMEM135,NLGN1,HSPG2,EFNA5,SEMA5A,PLXNA4,ADAM12,EPHA7,MAP2K1,BMPR2,ECSCR,PID1,ITGA5,SNAI2,ZMPSTE24,FGD6
GO:BP	regulation of organelle organization	GO:0033043	0.00538544	2.26878	1180	398	46	21092	PRKN,DCTN1,FER,SMAD3,TRIOBP,TENM1,CTNNB1,DIAPH1,DLC1,RDX,XRCC5,SMARCA2,CLTC,SIN3A,CDKL5,SMARCC2,DPF2,GAP43,KDR,PHIP,STXBP1,CAPZB,TRIM28,CCT3,RAD21,CLIC4,TMEM135,MARK4,NEB,SLF2,EFNA5,SEMA5A,TTBK2,NTRK3,MAP2K1,CKAP5,BBC3,PID1,CCP110,DYNC1H1,GMFB,TSG101,MAPRE1,RAB3GAP2,ADD3,ACTL6B
GO:BP	gliogenesis	GO:0042063	0.00540188	2.26745	315	398	20	21092	PTPN11,LRP8,DMD,SOX6,CTNNB1,SOX2,HES5,NR1D1,HDAC1,APP,ID4,CSPG4,GAP43,PLPP3,CDK6,NTRK3,MAP2K1,DLX1,MMP14,UFL1
GO:BP	cell junction assembly	GO:0034329	0.00551518	2.25844	431	398	24	21092	CNTNAP2,FER,SMAD3,CTNNB1,DLC1,ROBO2,DST,APP,FBXO45,NRXN3,GAP43,KDR,GPC6,PCDHB5,NLGN1,CDH24,ADGRL3,EFNA5,NTRK3,EPHA7,ITGA5,SNAI2,MMP14,GABRG2
GO:BP	astrocyte differentiation	GO:0048708	0.0060719	2.21668	81	398	10	21092	PTPN11,HES5,NR1D1,APP,ID4,GAP43,PLPP3,CDK6,NTRK3,MAP2K1
GO:BP	cell cycle process	GO:0022402	0.00652722	2.18527	1226	398	47	21092	PTPN11,DCTN1,IGF1R,CSNK2A1,CTNNB1,SOX2,RDX,CKS1B,CDC25B,SMARCA2,KCNH5,PPP1R9B,CLTC,KLHL9,SIN3A,APP,KIF2A,SMARCC2,DPF2,POLA1,TACC1,ID4,ATP2B4,CCND2,PHIP,RAD21,PKIA,ZFP36L2,MARK4,LSM11,BABAM2,FMN2,DCTN2,SLF2,CDK6,DDX3X,MLH1,CKAP5,CCP110,DYNC1H1,ZMPSTE24,DCTN6,MAPRE1,SYF2,PPME1,E2F6,ACTL6B
GO:BP	macromolecule localization	GO:0033036	0.0068273	2.16575	3165	398	94	21092	CACNB3,CNTNAP2,PTPN11,PRKN,PEX3,NDUFAF2,SMAD3,DMD,TENM1,CTNNB1,DIAPH1,RDX,COG4,ARRB1,DNAJB2,XRCC5,DAB2,CACNG2,NR1D1,PPP1R9B,AHCYL1,CLTC,STX8,ERLEC1,SIN3A,RPL11,CELSR2,PITPNB,DOP1B,ZDHHC20,RIMS2,ID4,ATP2B4,GOT2,HSPA4,SQLE,STXBP1,SUMO1,AKAP5,PIGK,GPC6,TRIM28,CCT3,RAD21,LMAN2,PKIA,SRP68,AAK1,NUP205,NBEA,DERL2,IPO9,MARK4,HOOK3,STX12,FMN2,XPO4,DCTN2,USP9X,WNK3,NLGN1,SLF2,EFNA5,TTBK2,PEG10,DDX3X,CKAP5,…
GO:BP	macromolecule catabolic process	GO:0009057	0.00683127	2.1655	1380	398	51	21092	PRKN,UBQLN1,CSNK2A1,SMAD3,CTNNB1,RDX,FBXO33,ARRB1,DNAJB2,DAB2,KLHL3,NR1D1,STT3B,RSPRY1,FUCA1,ERLEC1,RPL11,FBXO45,CTSC,PSMD11,SUMO1,ZFP36L2,EDC4,DERL2,PNRC2,UBE2W,ABHD10,OTUD7A,FMN2,USP9X,TNRC6C,CPEB3,USP2,MLH1,FHIT,SPOP,ECSCR,FTO,SAMD4A,FXR2,UBE2K,HSPA5,ZMPSTE24,TSG101,CCDC22,PPP1R8,UFL1,PIAS1,TENT5A,SH3RF1,TRIM67
GO:BP	proteolysis involved in protein catabolic process	GO:0051603	0.00714728	2.14586	796	398	35	21092	PRKN,UBQLN1,CSNK2A1,CTNNB1,FBXO33,ARRB1,DNAJB2,DAB2,KLHL3,NR1D1,STT3B,RSPRY1,ERLEC1,RPL11,FBXO45,CTSC,PSMD11,SUMO1,DERL2,UBE2W,OTUD7A,USP9X,USP2,FHIT,SPOP,ECSCR,UBE2K,HSPA5,ZMPSTE24,TSG101,CCDC22,UFL1,PIAS1,SH3RF1,TRIM67
GO:BP	signaling	GO:0023052	0.0072877	2.13741	6492	398	165	21092	CACNB3,CNTNAP2,PTPN11,PRKAG2,PRKN,NDUFAF2,PTCH2,GRIA3,IGF1R,FER,LRP8,UBQLN1,SCN1A,CSNK2A1,SMAD3,PPP2R1B,DMD,ITGA7,RAB33A,ABHD2,GRM1,TENM1,CTNNB1,DLC1,SOX2,NCOA3,INHA,RDX,ROBO2,KMT2D,ARRB1,TIAL1,DST,HNRNPK,DDX17,BICC1,FZD8,PRKG1,DAB2,RBPJ,HES5,RCAN2,CACNG2,GABRA4,SLIT3,NR1D1,POGLUT1,PPP1R9B,PLCB4,AHCYL1,HDAC1,PREX2,GRIA1,ERLEC1,MAPK7,SIN3A,POR,RPL11,APP,GPR137C,MYO9B,CELSR2,ARHGEF40,NRXN3,DPF2,FGD…
GO:BP	regulation of phosphorylation	GO:0042325	0.00829046	2.08142	1237	398	47	21092	PTPN11,PRKAG2,PRKN,IGF1R,FER,LRP8,DMD,TENM1,INHA,ARRB1,CKS1B,CDC25B,XRCC5,FZD8,DAB2,HES5,PPP1R9B,IMPACT,APP,ATP2B4,CCND2,CSPG4,DUSP6,KDR,PHIP,PLPP3,LCP2,PKIA,DAZAP2,AIDA,WNK3,EFNA5,NTRK3,EPHA7,DDX3X,NDUFS4,MAP2K1,BMPR2,STK4,PID1,ITGA5,PGAM1,FXR2,UBE2K,TSG101,IPO7,EPHB4
GO:BP	organelle organization	GO:0006996	0.00939885	2.02693	3545	398	102	21092	PRKN,PEX3,DCTN1,NDUFAF2,FER,UBQLN1,SMAD3,DMD,TRIOBP,TENM1,CTNNB1,DIAPH1,DLC1,TTLL5,NEBL,SF1,RDX,COG4,ARRB1,CDC25B,DST,XRCC5,PRKG1,SMARCA2,NDUFA12,PPP1R9B,TUBB2A,ATP6V0A1,CLTC,STX8,COBL,SIN3A,RPL11,RETREG1,KIF2A,CELSR2,COA3,PITPNB,DOP1B,CDKL5,SMARCC2,DPF2,FGD4,TACC1,GAP43,HSPA4,KDR,PHIP,SQLE,STXBP1,SUMO1,CAPZB,TRIM28,CCT3,RAD21,LMAN2,CLIC4,NUP205,TMEM70,TMEM135,MARK4,HOOK3,STX12,FMN2,DCTN2,NEB,NLG…
GO:BP	response to endogenous stimulus	GO:0009719	0.00957385	2.01891	1592	398	56	21092	PTPN11,PRKN,IGF1R,FER,SMAD3,ABHD2,SOX6,CTNNB1,DIAPH1,NCOA3,RDX,ROBO2,KMT2D,DDX17,DAB2,RBPJ,HES5,SRA1,SLIT3,NR1D1,PPP1R9B,AHCYL1,HDAC1,MAPK7,SIN3A,IMPACT,POR,APP,KLF9,ATP2B4,KDR,PHIP,ZFP36L2,STRAP,USP9X,ATP1A1,EFNA5,CPEB3,NTRK3,PEG10,DLX1,BMPR2,PCSK1,PID1,HTRA1,SNAI2,MMP14,HSPA5,ZMPSTE24,UFL1,RAB10,HCN1,RRAGC,SOGA1,GABRG2,SORT1
GO:BP	regulation of protein localization to cell periphery	GO:1904375	0.0101209	1.99478	126	398	12	21092	DAB2,CACNG2,PPP1R9B,CLTC,STX8,ATP2B4,AKAP5,GPC6,WNK3,PID1,PTPN9,MMP14
GO:BP	developmental cell growth	GO:0048588	0.0111166	1.95403	222	398	16	21092	PRKN,CTNNB1,KMT2D,SLIT3,COBL,SIN3A,IMPACT,APP,CDKL5,RIMS2,USP9X,EFNA5,SEMA5A,PLXNA4,EPHA7,BMPR2
GO:BP	negative regulation of glial cell differentiation	GO:0045686	0.0118373	1.92675	25	398	6	21092	CTNNB1,HES5,NR1D1,ID4,NTRK3,DLX1
GO:BP	apoptotic process	GO:0006915	0.0126907	1.89652	1889	398	63	21092	PRKN,IGF1R,LRP8,UBQLN1,CSNK2A1,SMAD3,PPP2R1B,CTNNB1,DLC1,ROBO2,TIAL1,HNRNPK,DAB2,RBM5,SRA1,SLIT3,PTRH2,AHCYL1,HDAC1,MAPK7,SIN3A,POR,RPL11,APP,RETREG1,DPF2,CCND2,CTSC,DUSP6,KDR,PHIP,STXBP1,KMT2A,RAD21,AATF,BCL11B,ING3,BABAM2,FMN2,WNK3,RNF152,SEMA5A,PEG10,EPHA7,DDX3X,MLH1,FHIT,SMNDC1,DLX1,BMPR2,BBC3,STK4,ECSCR,ITGA5,HTRA1,SNAI2,HSPA5,ZMPSTE24,UFL1,SH3RF1,RRAGC,PHLPP1,SORT1
GO:BP	developmental growth	GO:0048589	0.0127576	1.89423	646	398	30	21092	PTPN11,PRKN,SMAD3,DMD,CTNNB1,SOX2,KMT2D,RBPJ,SLIT3,COBL,SIN3A,IMPACT,POR,APP,CDKL5,RIMS2,DUSP6,GAP43,TRIM28,CLIC4,USP9X,EFNA5,SEMA5A,PLXNA4,EPHA7,BMPR2,STK4,RASAL2,FTO,ZMPSTE24
GO:BP	cell communication	GO:0007154	0.0130315	1.88501	6551	398	165	21092	CACNB3,CNTNAP2,PTPN11,PRKAG2,PRKN,NDUFAF2,PTCH2,GRIA3,IGF1R,FER,LRP8,UBQLN1,SCN1A,CSNK2A1,SMAD3,PPP2R1B,DMD,ITGA7,RAB33A,ABHD2,GRM1,TENM1,CTNNB1,DLC1,SOX2,NCOA3,INHA,RDX,ROBO2,KMT2D,ARRB1,TIAL1,DST,HNRNPK,DDX17,BICC1,FZD8,PRKG1,DAB2,RBPJ,HES5,RCAN2,CACNG2,GABRA4,SLIT3,NR1D1,POGLUT1,PPP1R9B,PLCB4,AHCYL1,HDAC1,PREX2,GRIA1,ERLEC1,MAPK7,SIN3A,IMPACT,POR,RPL11,APP,GPR137C,MYO9B,CELSR2,ARHGEF40,NRXN3,D…
GO:BP	cellular process	GO:0009987	0.0137795	1.86077	19221	398	385	21092	CACNB3,ETFA,CNTNAP2,C1GALT1,PTPN11,PRKAG2,DLD,PRPF3,ANKH,PRKN,PEX3,DCTN1,NDUFAF2,PTCH2,GRIA3,IGF1R,FER,LRP8,UBQLN1,GALNT2,SCN1A,CSNK2A1,SMAD3,IMPDH2,PPP2R1B,PAPSS2,DMD,ITGA7,TRPS1,RAB33A,ABHD2,GRM1,KCNK9,TRIOBP,SOX6,TENM1,CTNNB1,DIAPH1,DLC1,SOX2,NCOA3,TTLL5,INHA,NEBL,SF1,RDX,COG4,FBXO33,ROBO2,POLR2A,KMT2D,ARRB1,SALL3,CKS1B,CDC25B,TIAL1,DST,CUX1,DNAJB2,HNRNPK,HSF2,DDX17,BICC1,XRCC5,FZD8,PRKG1,DAB2…
GO:BP	regulation of cellular catabolic process	GO:0031329	0.0144221	1.84097	787	398	34	21092	PRKN,UBQLN1,CSNK2A1,DNAJB2,DAB2,ATP6V0A1,RPL11,APP,ATP2B4,ATP6V1C1,KDR,SUMO1,ZFP36L2,USP9X,TNRC6C,RNF152,CPEB3,MLH1,FHIT,FTO,SAMD4A,PGAM1,FXR2,UBE2K,ZMPSTE24,RAB3GAP2,CCDC22,UFL1,PIAS1,TENT5A,SH3RF1,RRAGC,SOGA1,TRIM67
GO:BP	negative regulation of developmental process	GO:0051093	0.0144535	1.84003	929	398	38	21092	PTPN11,PRKN,SMAD3,DMD,SOX6,CTNNB1,SOX2,INHA,ROBO2,RBPJ,HES5,SRA1,SMARCA2,NR1D1,HDAC1,SIN3A,APP,DPF2,ID4,ATP2B4,ZFP36L2,TLX3,HOOK3,NLGN1,HSPG2,EFNA5,SEMA5A,CDK6,NTRK3,EPHA7,DLX1,BMPR2,STK4,ECSCR,SNAI2,ACTL6B,SORT1,KLF7
GO:BP	negative regulation of protein metabolic process	GO:0051248	0.0146888	1.83301	1039	398	41	21092	PRKAG2,PRKN,CSNK2A1,SMAD3,DMD,CTNNB1,ARRB1,DNAJB2,PPP1R9B,SIN3A,IMPACT,POR,RPL11,APP,ATP2B4,DUSP6,PLPP3,SPON1,PKIA,ZFP36L2,AATF,AIDA,FMN2,USP9X,TNRC6C,CPEB3,NTRK3,DDX3X,MLH1,FHIT,FTO,PID1,SAMD4A,EIF4E2,FXR2,TSG101,IPO7,PPP1R8,UFL1,SH3RF1,RTN1
GO:BP	regulation of protein localization to membrane	GO:1905475	0.0148978	1.82688	177	398	14	21092	PRKN,DAB2,CACNG2,PPP1R9B,CLTC,STX8,ATP2B4,AKAP5,GPC6,WNK3,BBC3,PID1,PTPN9,MMP14
GO:BP	programmed cell death	GO:0012501	0.0155242	1.80899	1942	398	64	21092	PRKN,IGF1R,LRP8,UBQLN1,CSNK2A1,SMAD3,PPP2R1B,CTNNB1,DLC1,ROBO2,TIAL1,HNRNPK,DAB2,RBM5,SRA1,SLIT3,PTRH2,AHCYL1,HDAC1,MAPK7,SIN3A,POR,RPL11,APP,RETREG1,DPF2,CCND2,CTSC,DUSP6,KDR,PHIP,STXBP1,KMT2A,RAD21,AATF,BCL11B,ING3,MARK4,BABAM2,FMN2,WNK3,RNF152,SEMA5A,PEG10,EPHA7,DDX3X,MLH1,FHIT,SMNDC1,DLX1,BMPR2,BBC3,STK4,ECSCR,ITGA5,HTRA1,SNAI2,HSPA5,ZMPSTE24,UFL1,SH3RF1,RRAGC,PHLPP1,SORT1
GO:BP	regulation of cell morphogenesis	GO:0022604	0.0159497	1.79725	310	398	19	21092	PRKN,LRP8,ITGA7,TRIOBP,DIAPH1,DLC1,RDX,CUX1,DAB2,CDKL5,FGD4,RIMS2,KDR,PHIP,CAPZB,EFNA5,PLXNA4,ZMPSTE24,FGD6
GO:BP	glial cell differentiation	GO:0010001	0.0184025	1.73512	231	398	16	21092	PTPN11,DMD,SOX6,CTNNB1,SOX2,HES5,NR1D1,HDAC1,APP,ID4,GAP43,PLPP3,CDK6,NTRK3,MAP2K1,DLX1
GO:BP	regulation of phosphate metabolic process	GO:0019220	0.0184197	1.73472	1391	398	50	21092	PTPN11,PRKAG2,PRKN,IGF1R,FER,LRP8,SMAD3,DMD,TENM1,DLC1,INHA,ARRB1,CKS1B,CDC25B,XRCC5,FZD8,DAB2,HES5,PPP1R9B,IMPACT,APP,ATP2B4,CCND2,CSPG4,DUSP6,KDR,PHIP,PLPP3,LCP2,PKIA,DAZAP2,AIDA,WNK3,EFNA5,NTRK3,EPHA7,DDX3X,NDUFS4,MAP2K1,BMPR2,STK4,PID1,ITGA5,PGAM1,FXR2,UBE2K,TSG101,IPO7,PPP1R8,EPHB4
GO:BP	regulation of phosphorus metabolic process	GO:0051174	0.018781	1.72628	1392	398	50	21092	PTPN11,PRKAG2,PRKN,IGF1R,FER,LRP8,SMAD3,DMD,TENM1,DLC1,INHA,ARRB1,CKS1B,CDC25B,XRCC5,FZD8,DAB2,HES5,PPP1R9B,IMPACT,APP,ATP2B4,CCND2,CSPG4,DUSP6,KDR,PHIP,PLPP3,LCP2,PKIA,DAZAP2,AIDA,WNK3,EFNA5,NTRK3,EPHA7,DDX3X,NDUFS4,MAP2K1,BMPR2,STK4,PID1,ITGA5,PGAM1,FXR2,UBE2K,TSG101,IPO7,PPP1R8,EPHB4
GO:BP	synapse organization	GO:0050808	0.0192798	1.7149	433	398	23	21092	CACNB3,DCTN1,IGF1R,LRP8,CTNNB1,ROBO2,CACNG2,APP,FBXO45,NFIA,CDKL5,NRXN3,GAP43,GPC6,SYN1,PCDHB5,NLGN1,ADGRL3,EFNA5,NTRK3,EPHA7,CHD4,GABRG2
GO:BP	positive regulation of transcription by RNA polymerase II	GO:0045944	0.0209049	1.67975	1243	398	46	21092	PRKN,SMAD3,CTNNB1,SOX2,NCOA3,KMT2D,ARRB1,HNRNPK,HSF2,DDX17,DAB2,RBPJ,HES5,SMARCA2,NR1D1,HDAC1,MAPK7,SIN3A,APP,ATAD2,ZNF507,NFIA,ZBTB18,TFE3,DPF2,ID4,PHIP,KMT2A,AATF,BCL11B,TCF20,KMT2C,ZNF225,DDX3X,DLX1,BMPR2,SSBP3,PID1,HSPA5,CHD6,CREB3L2,NR6A1,KLF7,KAT6A,ASXL3,COQ7
GO:BP	modification-dependent protein catabolic process	GO:0019941	0.021657	1.6644	698	398	31	21092	PRKN,UBQLN1,CSNK2A1,CTNNB1,FBXO33,ARRB1,DNAJB2,DAB2,KLHL3,STT3B,ERLEC1,RPL11,FBXO45,PSMD11,SUMO1,DERL2,UBE2W,OTUD7A,USP9X,USP2,FHIT,SPOP,UBE2K,HSPA5,ZMPSTE24,TSG101,CCDC22,UFL1,PIAS1,SH3RF1,TRIM67
GO:BP	epithelium development	GO:0060429	0.0223121	1.65146	1208	398	45	21092	C1GALT1,PTCH2,FER,SMAD3,DMD,TRIOBP,CTNNB1,DLC1,NCOA3,RDX,ROBO2,DAB2,RBPJ,HES5,KLHL3,POGLUT1,HDAC1,COBL,BTBD7,CELSR2,ID4,KDR,DLX6,GPC6,TRIM28,HS2ST1,CLIC4,BCL11B,COL18A1,CDK6,PLXNA4,EPHA7,MAP2K1,BMPR2,STK4,SSBP3,ITGA5,SNAI2,MMP14,ZMPSTE24,TSG101,RAB10,LIN7C,FASN,KLF7
GO:BP	positive regulation of cell projection organization	GO:0031346	0.0228614	1.6409	347	398	20	21092	IGF1R,LRP8,DMD,TENM1,ROBO2,CUX1,COBL,CDKL5,MARK4,NLGN1,EFNA5,SEMA5A,PLXNA4,NTRK3,MAP2K1,BMPR2,CCP110,HSPA5,CREB3L2,TRIM67
GO:BP	telencephalon development	GO:0021537	0.0229349	1.6395	262	398	17	21092	CNTNAP2,IGF1R,LRP8,DMD,CTNNB1,ROBO2,HES5,PPP1R9B,HDAC1,FBXO45,TACC1,ID4,ATP2B4,BCL11B,CDK6,PLXNA4,DLX1
GO:BP	response to stimulus	GO:0050896	0.0235366	1.62826	9000	398	212	21092	CACNB3,CNTNAP2,PTPN11,PRKAG2,ANKH,PRKN,NDUFAF2,PTCH2,GRIA3,IGF1R,F8,FER,LRP8,UBQLN1,SCN1A,CSNK2A1,SMAD3,IMPDH2,PPP2R1B,PAPSS2,DMD,ITGA7,RAB33A,ABHD2,GRM1,SOX6,TENM1,CTNNB1,DIAPH1,DLC1,SOX2,NCOA3,INHA,RDX,ROBO2,POLR2A,KMT2D,ARRB1,TIAL1,DST,DNAJB2,HNRNPK,DDX17,BICC1,XRCC5,FZD8,PRKG1,DAB2,RBPJ,HES5,STMP1,RCAN2,SRA1,CACNG2,SMARCA2,NDUFA12,GABRA4,KIN,SLIT3,NR1D1,POGLUT1,STT3B,PPP1R9B,PLCB4,AHCYL1,HDAC…
GO:BP	cellular localization	GO:0051641	0.0251354	1.59971	3580	398	101	21092	CACNB3,CNTNAP2,PTPN11,PRKN,PEX3,DCTN1,NDUFAF2,FER,SCN1A,SMAD3,DMD,TENM1,CTNNB1,DIAPH1,RDX,COG4,ARRB1,DST,DNAJB2,XRCC5,DAB2,CACNG2,NR1D1,PPP1R9B,AHCYL1,CLTC,STX8,ERLEC1,SIN3A,RPL11,APP,CELSR2,DOP1B,ZDHHC20,NRXN3,RIMS2,ID4,ATP2B4,HSPA4,STXBP1,SUMO1,AKAP5,PIGK,GPC6,TRIM28,CCT3,RAD21,LMAN2,PKIA,SYN1,SRP68,AAK1,NUP205,NBEA,DERL2,IPO9,MARK4,HOOK3,STX12,FMN2,XPO4,DCTN2,USP9X,WNK3,NLGN1,SLF2,EFNA5,TTBK2,…
GO:BP	developmental growth involved in morphogenesis	GO:0060560	0.0253806	1.5955	237	398	16	21092	PRKN,CTNNB1,SLIT3,COBL,SIN3A,IMPACT,APP,CDKL5,RIMS2,TRIM28,USP9X,EFNA5,SEMA5A,PLXNA4,EPHA7,BMPR2
GO:BP	tissue development	GO:0009888	0.0256552	1.59082	1973	398	64	21092	C1GALT1,PTPN11,ANKH,PTCH2,FER,SMAD3,DMD,ITGA7,TRPS1,TRIOBP,SOX6,CTNNB1,DLC1,SOX2,NCOA3,NEBL,RDX,ROBO2,DDX17,DAB2,RBPJ,HES5,KLHL3,POGLUT1,HDAC1,COBL,POR,BTBD7,CELSR2,EGFLAM,ZBTB18,ID4,KDR,DLX6,GPC6,TRIM28,HS2ST1,CLIC4,BCL11B,COL18A1,NEB,HSPG2,SEMA5A,CDK6,PLXNA4,EPHA7,MAP2K1,BMPR2,STK4,RASAL2,SSBP3,FTO,ITGA5,SNAI2,MMP14,ZMPSTE24,TSG101,RAB10,TENT5A,LIN7C,CREB3L2,FASN,KLF7,AMER2
GO:BP	regulation of growth	GO:0040008	0.0265665	1.57567	671	398	30	21092	PRKN,PTCH2,CSNK2A1,SMAD3,DNAJB2,DAB2,RBPJ,SMARCA2,SLIT3,PPP1R9B,SIN3A,APP,CDKL5,RIMS2,DUSP6,GAP43,DERL2,ING3,EFNA5,SEMA5A,PLXNA4,EPHA7,DDX3X,BMPR2,BBC3,STK4,FTO,MMP14,ZMPSTE24,TSG101
GO:BP	axonogenesis	GO:0007409	0.0268291	1.57139	442	398	23	21092	PTPN11,IGF1R,ROBO2,SLIT3,COBL,SIN3A,APP,FBXO45,CDKL5,NRXN3,GAP43,STXBP1,BCL11B,USP9X,EFNA5,SEMA5A,PLXNA4,EPHA7,MAP2K1,BMPR2,RAB10,KLF7,EPHB4
GO:BP	cellular response to growth factor stimulus	GO:0071363	0.0281178	1.55102	673	398	30	21092	PTPN11,IGF1R,LRP8,SMAD3,DMD,SOX6,CTNNB1,RDX,DAB2,RBPJ,HES5,PPP1R9B,HDAC1,MAPK7,SIN3A,APP,ATP2B4,KDR,ZFP36L2,STRAP,USP9X,NTRK3,PEG10,DLX1,BMPR2,ITGA5,HTRA1,SNAI2,HSPA5,SORT1
GO:BP	modification-dependent macromolecule catabolic process	GO:0043632	0.0293962	1.53171	709	398	31	21092	PRKN,UBQLN1,CSNK2A1,CTNNB1,FBXO33,ARRB1,DNAJB2,DAB2,KLHL3,STT3B,ERLEC1,RPL11,FBXO45,PSMD11,SUMO1,DERL2,UBE2W,OTUD7A,USP9X,USP2,FHIT,SPOP,UBE2K,HSPA5,ZMPSTE24,TSG101,CCDC22,UFL1,PIAS1,SH3RF1,TRIM67
GO:BP	regulation of catabolic process	GO:0009894	0.0296732	1.52764	996	398	39	21092	PRKAG2,PRKN,UBQLN1,CSNK2A1,SMAD3,RDX,DNAJB2,DAB2,ATP6V0A1,RPL11,APP,ATP2B4,ATP6V1C1,KDR,SUMO1,ZFP36L2,FMN2,USP9X,TNRC6C,RNF152,CPEB3,MLH1,FHIT,ECSCR,FTO,SAMD4A,PGAM1,FXR2,UBE2K,ZMPSTE24,RAB3GAP2,CCDC22,UFL1,PIAS1,TENT5A,SH3RF1,RRAGC,SOGA1,TRIM67
GO:BP	regulation of proteasomal ubiquitin-dependent protein catabolic process	GO:0032434	0.0321401	1.49295	141	398	12	21092	PRKN,UBQLN1,DNAJB2,DAB2,RPL11,SUMO1,USP9X,FHIT,UBE2K,UFL1,PIAS1,SH3RF1
GO:BP	negative regulation of transcription by RNA polymerase II	GO:0000122	0.0324025	1.48942	963	398	38	21092	PRKN,SMAD3,TRPS1,CTNNB1,SOX2,CUX1,DAB2,RBPJ,HES5,SMARCA2,NR1D1,HDAC1,SIN3A,IMPACT,ZBTB18,SMARCC2,DPF2,ID4,TRIM28,PKIA,STRAP,USP9X,ZNF79,CDK6,CPEB3,USP2,ZFP90,DLX1,CHD4,SNAI2,ZNF134,TSG101,PIAS1,E2F6,NR6A1,AEBP1,KLF7,COQ7
GO:BP	proteolysis	GO:0006508	0.0330603	1.48069	1783	398	59	21092	DLD,PRKN,LRP8,UBQLN1,CSNK2A1,SMAD3,CTNNB1,DLC1,SOX2,FBXO33,ARRB1,DNAJB2,PAMR1,DAB2,KLHL3,NR1D1,STT3B,RSPRY1,HDAC1,ERLEC1,POR,RPL11,APP,FBXO45,CTSC,PSMD11,TPP2,SUMO1,PIGK,MMP16,SPON1,DERL2,UBE2W,OTUD7A,BABAM2,USP9X,ADAM12,USP2,EPHA7,DDX3X,FHIT,BBC3,SPOP,PCSK1,ECSCR,HTRA1,MMP14,UBE2K,HSPA5,ZMPSTE24,TSG101,CCDC22,UFL1,PIAS1,SH3RF1,SPCS3,LDLRAD3,AEBP1,TRIM67
GO:BP	positive regulation of nucleic acid-templated transcription	GO:1903508	0.0338569	1.47035	1703	398	57	21092	PRKN,SMAD3,CTNNB1,SOX2,NCOA3,KMT2D,ARRB1,HNRNPK,HSF2,DDX17,DAB2,RBPJ,HES5,SRA1,SMARCA2,NR1D1,HDAC1,MAPK7,SIN3A,APP,ATAD2,ZNF507,NFIA,ZBTB18,TFE3,SMARCC2,DPF2,TACC1,ID4,PHIP,TRIM28,KMT2A,AATF,BCL11B,ING3,TCF20,KMT2C,ZNF225,ZFP90,DDX3X,MAP2K1,DLX1,BMPR2,CHD4,SSBP3,PID1,SEC14L2,HSPA5,TSG101,CHD6,ACTL6B,CREB3L2,NR6A1,KLF7,KAT6A,ASXL3,COQ7
GO:BP	positive regulation of DNA-templated transcription	GO:0045893	0.0338569	1.47035	1703	398	57	21092	PRKN,SMAD3,CTNNB1,SOX2,NCOA3,KMT2D,ARRB1,HNRNPK,HSF2,DDX17,DAB2,RBPJ,HES5,SRA1,SMARCA2,NR1D1,HDAC1,MAPK7,SIN3A,APP,ATAD2,ZNF507,NFIA,ZBTB18,TFE3,SMARCC2,DPF2,TACC1,ID4,PHIP,TRIM28,KMT2A,AATF,BCL11B,ING3,TCF20,KMT2C,ZNF225,ZFP90,DDX3X,MAP2K1,DLX1,BMPR2,CHD4,SSBP3,PID1,SEC14L2,HSPA5,TSG101,CHD6,ACTL6B,CREB3L2,NR6A1,KLF7,KAT6A,ASXL3,COQ7
GO:BP	mitotic cell cycle phase transition	GO:0044772	0.0369622	1.43224	451	398	23	21092	RDX,CKS1B,CDC25B,SMARCA2,KCNH5,PPP1R9B,SIN3A,APP,SMARCC2,DPF2,ID4,CCND2,RAD21,PKIA,ZFP36L2,LSM11,BABAM2,CDK6,DDX3X,SYF2,PPME1,E2F6,ACTL6B
GO:BP	positive regulation of RNA biosynthetic process	GO:1902680	0.0374613	1.42642	1709	398	57	21092	PRKN,SMAD3,CTNNB1,SOX2,NCOA3,KMT2D,ARRB1,HNRNPK,HSF2,DDX17,DAB2,RBPJ,HES5,SRA1,SMARCA2,NR1D1,HDAC1,MAPK7,SIN3A,APP,ATAD2,ZNF507,NFIA,ZBTB18,TFE3,SMARCC2,DPF2,TACC1,ID4,PHIP,TRIM28,KMT2A,AATF,BCL11B,ING3,TCF20,KMT2C,ZNF225,ZFP90,DDX3X,MAP2K1,DLX1,BMPR2,CHD4,SSBP3,PID1,SEC14L2,HSPA5,TSG101,CHD6,ACTL6B,CREB3L2,NR6A1,KLF7,KAT6A,ASXL3,COQ7
GO:BP	proteasome-mediated ubiquitin-dependent protein catabolic process	GO:0043161	0.0396376	1.40189	453	398	23	21092	PRKN,UBQLN1,CTNNB1,FBXO33,ARRB1,DNAJB2,DAB2,STT3B,ERLEC1,RPL11,FBXO45,PSMD11,SUMO1,DERL2,UBE2W,USP9X,FHIT,SPOP,UBE2K,HSPA5,UFL1,PIAS1,SH3RF1
GO:BP	regulation of intracellular signal transduction	GO:1902531	0.0407331	1.39005	1714	398	57	21092	PTPN11,PRKN,IGF1R,UBQLN1,DMD,GRM1,TENM1,CTNNB1,DLC1,SOX2,RDX,ARRB1,TIAL1,HNRNPK,FZD8,DAB2,NR1D1,HDAC1,PREX2,MAPK7,RPL11,APP,GPR137C,MYO9B,ARHGEF40,FGD4,ATP2B4,CSPG4,DUSP6,KDR,AKAP5,ARHGAP29,AIDA,OTUD7A,BABAM2,USP9X,NLGN1,RNF152,SEMA5A,USP2,NTRK3,RALGAPA2,EPHA7,DDX3X,MAP2K1,BBC3,STK4,SNAI2,ZMPSTE24,SOS2,CCDC22,UFL1,SH3RF1,RRAGC,PHLPP1,TRIM67,KAT6A
GO:BP	ubiquitin-dependent protein catabolic process	GO:0006511	0.0426634	1.36994	688	398	30	21092	PRKN,UBQLN1,CSNK2A1,CTNNB1,FBXO33,ARRB1,DNAJB2,DAB2,KLHL3,STT3B,ERLEC1,RPL11,FBXO45,PSMD11,SUMO1,DERL2,UBE2W,OTUD7A,USP9X,USP2,FHIT,SPOP,UBE2K,HSPA5,TSG101,CCDC22,UFL1,PIAS1,SH3RF1,TRIM67
GO:BP	cell cycle phase transition	GO:0044770	0.0434241	1.36227	553	398	26	21092	PTPN11,SOX2,RDX,CKS1B,CDC25B,SMARCA2,KCNH5,PPP1R9B,SIN3A,APP,SMARCC2,DPF2,ID4,ATP2B4,CCND2,RAD21,PKIA,ZFP36L2,LSM11,BABAM2,CDK6,DDX3X,SYF2,PPME1,E2F6,ACTL6B
GO:BP	positive regulation of phosphorus metabolic process	GO:0010562	0.0440992	1.35557	903	398	36	21092	PTPN11,PRKAG2,IGF1R,LRP8,SMAD3,TENM1,DLC1,INHA,ARRB1,CKS1B,CDC25B,XRCC5,FZD8,DAB2,HES5,APP,ATP2B4,CCND2,CSPG4,KDR,PLPP3,LCP2,DAZAP2,WNK3,EFNA5,NTRK3,EPHA7,DDX3X,MAP2K1,BMPR2,STK4,PID1,ITGA5,FXR2,UBE2K,EPHB4
GO:BP	positive regulation of phosphate metabolic process	GO:0045937	0.0440992	1.35557	903	398	36	21092	PTPN11,PRKAG2,IGF1R,LRP8,SMAD3,TENM1,DLC1,INHA,ARRB1,CKS1B,CDC25B,XRCC5,FZD8,DAB2,HES5,APP,ATP2B4,CCND2,CSPG4,KDR,PLPP3,LCP2,DAZAP2,WNK3,EFNA5,NTRK3,EPHA7,DDX3X,MAP2K1,BMPR2,STK4,PID1,ITGA5,FXR2,UBE2K,EPHB4
GO:BP	proteasomal protein catabolic process	GO:0010498	0.0491677	1.30832	524	398	25	21092	PRKN,UBQLN1,CTNNB1,FBXO33,ARRB1,DNAJB2,DAB2,NR1D1,STT3B,ERLEC1,RPL11,FBXO45,PSMD11,SUMO1,DERL2,UBE2W,USP9X,FHIT,SPOP,ECSCR,UBE2K,HSPA5,UFL1,PIAS1,SH3RF1

## Sheet: HvS_PFC
source	term_name	term_id	adjusted_p_value	negative_log10_of_adjusted_p_value	term_size	query_size	intersection_size	effective_domain_size	intersections
GO:BP	neurogenesis	GO:0022008	5.22117e-07	6.28223	1680	211	46	21092	CNTNAP2,APP,PTPN11,PRKN,SYN1,SOX2,ETV6,LRP8,CTNNB1,NEXMIF,ROBO2,XRCC5,DAB2,PTPRO,NR1D1,DNAJB11,PPP1R9B,TUBB2A,HDAC1,PREX2,COBL,SIN3A,HES5,NRXN3,RIMS2,STXBP1,SCRIB,HOOK3,USP9X,NLGN1,ADGRL3,EFNA5,SEMA5A,PLXNA4,CPEB3,NTRK3,EPHA7,MAP2K1,BCL2,MEIS1,NR2F2,SEMA4A,PARD3,PTPN9,RPS6KA5,MDGA2
GO:BP	cell development	GO:0048468	1.99177e-06	5.70076	2142	211	52	21092	CNTNAP2,APP,PTPN11,DLD,PRKN,SYN1,LRP8,SMAD3,CTNNB1,NEBL,SRC,ROBO2,KMT2D,TIAL1,XRCC5,DAB2,AFF4,PTPRO,SMARCA2,NR1D1,DNAJB11,PPP1R9B,FMN2,HDAC1,PREX2,COBL,L3MBTL3,SIN3A,IFT81,HES5,NRXN3,RIMS2,STXBP1,CLIC4,SCRIB,HOOK3,USP9X,NEB,NLGN1,EFNA5,SEMA5A,PLXNA4,CPEB3,NTRK3,EPHA7,MAP2K1,BCL2,MEIS1,SEMA4A,PARD3,PTPN9,RPS6KA5
GO:BP	nervous system development	GO:0007399	2.72878e-06	5.56403	2504	211	57	21092	CNTNAP2,APP,PTPN11,PRKN,SYN1,DCTN1,SOX2,ETV6,LRP8,CTNNB1,NME1,SRC,NEXMIF,ROBO2,XRCC5,LRRN3,DAB2,PTPRO,SMARCA2,NR1D1,DNAJB11,PPP1R9B,TUBB2A,HDAC1,PREX2,COBL,SIN3A,HES5,NRXN3,RIMS2,CTSC,STXBP1,DLX6,GPC6,SCRIB,HOOK3,USP9X,NLGN1,ADGRL3,EFNA5,SEMA5A,PLXNA4,CPEB3,NTRK3,EPHA7,MAP2K1,BCL2,MEIS1,TTBK2,NR2F2,SEMA4A,LRFN5,PARD3,PTPN9,RPS6KA5,MDGA2,DNAH5
GO:BP	generation of neurons	GO:0048699	3.19381e-06	5.49569	1465	211	41	21092	CNTNAP2,APP,PTPN11,PRKN,SYN1,SOX2,LRP8,CTNNB1,NEXMIF,ROBO2,DAB2,PTPRO,PPP1R9B,TUBB2A,HDAC1,PREX2,COBL,SIN3A,HES5,NRXN3,RIMS2,STXBP1,SCRIB,USP9X,NLGN1,ADGRL3,EFNA5,SEMA5A,PLXNA4,CPEB3,NTRK3,EPHA7,MAP2K1,BCL2,MEIS1,NR2F2,SEMA4A,PARD3,PTPN9,RPS6KA5,MDGA2
GO:BP	anatomical structure development	GO:0048856	3.46104e-06	5.46079	5836	211	99	21092	CNTNAP2,APP,PTPN11,DLD,PRKN,SYN1,DCTN1,NBN,SOX2,BTRC,ETV6,LRP8,SMAD3,IMPDH2,PPP2R1B,PAPSS2,CTNNB1,PTCH2,NCOA3,INHA,NEBL,NME1,SF1,SRC,NEXMIF,ROBO2,KMT2D,TIAL1,DDX17,BICC1,XRCC5,LRRN3,DAB2,AFF4,SRA1,PTPRO,PRICKLE2,SMARCA2,KLHL3,NR1D1,DNAJB11,POGLUT1,PPP1R9B,FMN2,TUBB2A,HDAC1,PREX2,COBL,L3MBTL3,AFF3,SIN3A,IFT81,BTBD7,HES5,EGFLAM,ZBTB18,TFE3,NRXN3,RIMS2,CTSC,STXBP1,DLX6,GPC6,KMT2A,CLIC4,TTLL5,SCRIB,T…
GO:BP	plasma membrane bounded cell projection morphogenesis	GO:0120039	3.61011e-06	5.44248	647	211	26	21092	CNTNAP2,APP,PTPN11,PRKN,LRP8,CTNNB1,SRC,ROBO2,PTPRO,PREX2,COBL,SIN3A,NRXN3,RIMS2,STXBP1,USP9X,NLGN1,EFNA5,SEMA5A,PLXNA4,EPHA7,MAP2K1,BCL2,SEMA4A,PARD3,RPS6KA5
GO:BP	cell projection morphogenesis	GO:0048858	4.23993e-06	5.37264	652	211	26	21092	CNTNAP2,APP,PTPN11,PRKN,LRP8,CTNNB1,SRC,ROBO2,PTPRO,PREX2,COBL,SIN3A,NRXN3,RIMS2,STXBP1,USP9X,NLGN1,EFNA5,SEMA5A,PLXNA4,EPHA7,MAP2K1,BCL2,SEMA4A,PARD3,RPS6KA5
GO:BP	neuron projection development	GO:0031175	5.51451e-06	5.25849	970	211	32	21092	CNTNAP2,APP,PTPN11,PRKN,LRP8,CTNNB1,ROBO2,DAB2,PTPRO,PPP1R9B,PREX2,COBL,SIN3A,HES5,NRXN3,RIMS2,STXBP1,SCRIB,USP9X,NLGN1,EFNA5,SEMA5A,PLXNA4,CPEB3,NTRK3,EPHA7,MAP2K1,BCL2,SEMA4A,PARD3,PTPN9,RPS6KA5
GO:BP	regulation of cellular process	GO:0050794	5.81686e-06	5.23531	11130	211	153	21092	CNTNAP2,APP,PTPN11,PRKAG2,DLD,PRCC,PRKN,SYN1,DCTN1,NBN,NDUFAF2,SOX2,BTRC,ETV6,LRP8,UBQLN1,SCN1A,CSNK2A1,SMAD3,PPP2R1B,KCNMA1,GRM1,IDE,CTNNB1,PTCH2,NCOA3,INHA,NME1,SF1,SRC,NEXMIF,ROBO2,KMT2D,ARRB1,CKS1B,TIAL1,DST,STAU1,DNAJB2,HNRNPK,HSF2,DDX17,ERLEC1,BICC1,XRCC5,LRRN3,CACNB3,DAB2,SALL3,RBM5,SRA1,PTPRO,CACNG2,PRICKLE2,SMARCA2,SF3B4,PLCB4,NR1D1,DNAJB11,POGLUT1,PPP1R9B,FMN2,PTRH2,HDAC1,PREX2,CLTC,GRI…
GO:BP	cellular component morphogenesis	GO:0032989	7.44218e-06	5.1283	770	211	28	21092	CNTNAP2,APP,PTPN11,PRKN,LRP8,CTNNB1,NEBL,SRC,ROBO2,PTPRO,PREX2,COBL,SIN3A,NRXN3,RIMS2,STXBP1,USP9X,NEB,NLGN1,EFNA5,SEMA5A,PLXNA4,EPHA7,MAP2K1,BCL2,SEMA4A,PARD3,RPS6KA5
GO:BP	cell part morphogenesis	GO:0032990	7.70036e-06	5.11349	671	211	26	21092	CNTNAP2,APP,PTPN11,PRKN,LRP8,CTNNB1,SRC,ROBO2,PTPRO,PREX2,COBL,SIN3A,NRXN3,RIMS2,STXBP1,USP9X,NLGN1,EFNA5,SEMA5A,PLXNA4,EPHA7,MAP2K1,BCL2,SEMA4A,PARD3,RPS6KA5
GO:BP	multicellular organism development	GO:0007275	8.71143e-06	5.05991	4823	211	86	21092	CNTNAP2,APP,PTPN11,DLD,PRKN,SYN1,DCTN1,NBN,SOX2,BTRC,ETV6,LRP8,SMAD3,IMPDH2,PAPSS2,CTNNB1,PTCH2,NCOA3,INHA,NEBL,NME1,SF1,SRC,NEXMIF,ROBO2,BICC1,XRCC5,LRRN3,DAB2,PTPRO,SMARCA2,KLHL3,NR1D1,DNAJB11,POGLUT1,PPP1R9B,TUBB2A,HDAC1,PREX2,COBL,L3MBTL3,AFF3,SIN3A,BTBD7,HES5,TFE3,NRXN3,RIMS2,CTSC,STXBP1,DLX6,GPC6,KMT2A,CLIC4,TTLL5,SCRIB,HOOK3,USP9X,NEB,NLGN1,NHS,ADGRL3,EFNA5,SEMA5A,PLXNA4,CPEB3,NTRK3,CMIP,E…
GO:BP	negative regulation of cellular process	GO:0048523	9.54785e-06	5.02009	4749	211	85	21092	APP,PTPN11,PRKAG2,PRKN,NBN,NDUFAF2,SOX2,BTRC,ETV6,UBQLN1,CSNK2A1,SMAD3,CTNNB1,PTCH2,INHA,NME1,SF1,SRC,NEXMIF,ROBO2,ARRB1,TIAL1,DNAJB2,HNRNPK,ERLEC1,BICC1,XRCC5,DAB2,RBM5,SRA1,PTPRO,SMARCA2,NR1D1,DNAJB11,PPP1R9B,FMN2,PTRH2,HDAC1,CLTC,GRIA1,L3MBTL3,SIN3A,HES5,ZBTB18,CTSC,STXBP1,KMT2A,SPON1,PKIA,CLIC4,SCRIB,HOOK3,BABAM2,USP9X,ZC3H6,WNK3,NLGN1,ATP1A1,EFNA5,SEMA5A,PLXNA4,CPEB3,USP2,NTRK3,ZFP90,EPHA7,S…
GO:BP	neuron projection morphogenesis	GO:0048812	1.04221e-05	4.98205	632	211	25	21092	CNTNAP2,APP,PTPN11,PRKN,LRP8,CTNNB1,ROBO2,PTPRO,PREX2,COBL,SIN3A,NRXN3,RIMS2,STXBP1,USP9X,NLGN1,EFNA5,SEMA5A,PLXNA4,EPHA7,MAP2K1,BCL2,SEMA4A,PARD3,RPS6KA5
GO:BP	positive regulation of cellular process	GO:0048522	1.52412e-05	4.81698	5641	211	95	21092	CNTNAP2,APP,PTPN11,PRKAG2,PRKN,DCTN1,NBN,SOX2,BTRC,ETV6,LRP8,UBQLN1,CSNK2A1,SMAD3,PPP2R1B,KCNMA1,GRM1,CTNNB1,PTCH2,NCOA3,INHA,NME1,SRC,ROBO2,KMT2D,ARRB1,CKS1B,TIAL1,STAU1,DNAJB2,HNRNPK,HSF2,DDX17,XRCC5,LRRN3,CACNB3,DAB2,RBM5,SRA1,CACNG2,SMARCA2,SF3B4,NR1D1,POGLUT1,PPP1R9B,FMN2,PTRH2,HDAC1,COBL,SIN3A,RPS4X,HES5,GPR137C,EGFLAM,ZBTB18,TFE3,RIMS2,CTSC,STXBP1,STX4,DLX6,KMT2A,AAK1,SCRIB,LSM11,BABAM2,TC…
GO:BP	cell junction organization	GO:0034330	2.004e-05	4.6981	703	211	26	21092	CNTNAP2,APP,SYN1,DCTN1,LRP8,SMAD3,CTNNB1,SRC,ROBO2,DST,STAU1,LRRN3,CACNB3,PTPRO,CACNG2,NRXN3,GPC6,NLGN1,ADGRL3,EFNA5,NTRK3,EPHA7,BCL2,SEMA4A,LRFN5,PARD3
GO:BP	biological regulation	GO:0065007	2.26834e-05	4.64429	13096	211	169	21092	CNTNAP2,APP,PTPN11,PRKAG2,DLD,PRCC,PRKN,SYN1,DCTN1,NBN,NDUFAF2,SOX2,BTRC,F8,ETV6,LRP8,UBQLN1,SCN1A,CSNK2A1,SMAD3,PPP2R1B,PAPSS2,KCNMA1,GRM1,KCNK9,IDE,CTNNB1,PTCH2,NCOA3,INHA,NME1,SF1,SRC,FBXO33,NEXMIF,ROBO2,KMT2D,ARRB1,CKS1B,TIAL1,DST,STAU1,DNAJB2,HNRNPK,HSF2,DDX17,ERLEC1,BICC1,XRCC5,LRRN3,CACNB3,DAB2,AFF4,SALL3,RBM5,SRA1,PTPRO,CACNG2,PRICKLE2,SMARCA2,KLHL3,SF3B4,PLCB4,NR1D1,DNAJB11,POGLUT1,PPP1R…
GO:BP	cell junction assembly	GO:0034329	2.87502e-05	4.54136	431	211	20	21092	CNTNAP2,APP,SMAD3,CTNNB1,SRC,ROBO2,DST,LRRN3,PTPRO,NRXN3,GPC6,NLGN1,ADGRL3,EFNA5,NTRK3,EPHA7,BCL2,SEMA4A,LRFN5,PARD3
GO:BP	system development	GO:0048731	3.09057e-05	4.50996	4369	211	79	21092	CNTNAP2,APP,PTPN11,PRKN,SYN1,DCTN1,NBN,SOX2,ETV6,LRP8,SMAD3,IMPDH2,PAPSS2,CTNNB1,INHA,NEBL,NME1,SF1,SRC,NEXMIF,ROBO2,BICC1,XRCC5,LRRN3,DAB2,PTPRO,SMARCA2,KLHL3,NR1D1,DNAJB11,POGLUT1,PPP1R9B,TUBB2A,HDAC1,PREX2,COBL,L3MBTL3,SIN3A,BTBD7,HES5,TFE3,NRXN3,RIMS2,CTSC,STXBP1,DLX6,GPC6,KMT2A,CLIC4,TTLL5,SCRIB,HOOK3,USP9X,NEB,NLGN1,NHS,ADGRL3,EFNA5,SEMA5A,PLXNA4,CPEB3,NTRK3,EPHA7,STAT5B,MAP2K1,BCL2,MEIS1,T…
GO:BP	synapse organization	GO:0050808	3.10575e-05	4.50783	433	211	20	21092	APP,SYN1,DCTN1,LRP8,CTNNB1,ROBO2,STAU1,LRRN3,CACNB3,PTPRO,CACNG2,NRXN3,GPC6,NLGN1,ADGRL3,EFNA5,NTRK3,EPHA7,SEMA4A,LRFN5
GO:BP	developmental process	GO:0032502	3.1587e-05	4.50049	6424	211	103	21092	CNTNAP2,APP,PTPN11,DLD,PRKN,SYN1,DCTN1,NBN,SOX2,BTRC,ETV6,LRP8,SMAD3,IMPDH2,PPP2R1B,PAPSS2,CTNNB1,PTCH2,NCOA3,INHA,NEBL,NME1,SF1,SRC,NEXMIF,ROBO2,KMT2D,TIAL1,HSF2,DDX17,BICC1,XRCC5,LRRN3,DAB2,AFF4,SRA1,PTPRO,PRICKLE2,SMARCA2,KLHL3,NR1D1,DNAJB11,POGLUT1,PPP1R9B,FMN2,TUBB2A,HDAC1,PREX2,CLTC,COBL,L3MBTL3,AFF3,SIN3A,IFT81,BTBD7,HES5,EGFLAM,ZBTB18,TFE3,NRXN3,RIMS2,CTSC,STXBP1,DLX6,GPC6,KMT2A,CLIC4,TTL…
GO:BP	regulation of signaling	GO:0023051	4.39978e-05	4.35657	3374	211	66	21092	APP,PTPN11,PRKN,SYN1,NDUFAF2,SOX2,BTRC,LRP8,UBQLN1,CSNK2A1,SMAD3,PPP2R1B,GRM1,CTNNB1,PTCH2,NCOA3,INHA,SRC,ROBO2,KMT2D,ARRB1,TIAL1,STAU1,HNRNPK,BICC1,DAB2,PTPRO,CACNG2,PLCB4,NR1D1,POGLUT1,PPP1R9B,HDAC1,PREX2,GRIA1,ARHGAP29,SIN3A,IFT81,HES5,GPR137C,NRXN3,RIMS2,CTSC,STXBP1,STX4,GPC6,KMT2A,AAK1,SCRIB,BABAM2,USP9X,NLGN1,EFNA5,SEMA5A,CPEB3,USP2,NTRK3,RALGAPA2,EPHA7,MAP2K1,BCL2,ARHGEF9,PDE4B,CDH13,EMILI…
GO:BP	cell morphogenesis involved in differentiation	GO:0000904	4.66799e-05	4.33087	733	211	26	21092	APP,PTPN11,LRP8,CTNNB1,SRC,ROBO2,DAB2,PTPRO,PREX2,COBL,SIN3A,NRXN3,STXBP1,CLIC4,SCRIB,USP9X,NLGN1,EFNA5,SEMA5A,PLXNA4,EPHA7,MAP2K1,BCL2,SEMA4A,PARD3,RPS6KA5
GO:BP	neuron development	GO:0048666	4.98317e-05	4.30249	1122	211	33	21092	CNTNAP2,APP,PTPN11,PRKN,SYN1,LRP8,CTNNB1,ROBO2,DAB2,PTPRO,PPP1R9B,PREX2,COBL,SIN3A,HES5,NRXN3,RIMS2,STXBP1,SCRIB,USP9X,NLGN1,EFNA5,SEMA5A,PLXNA4,CPEB3,NTRK3,EPHA7,MAP2K1,BCL2,SEMA4A,PARD3,PTPN9,RPS6KA5
GO:BP	regulation of localization	GO:0032879	6.02072e-05	4.22035	2089	211	48	21092	APP,PTPN11,PRKAG2,PRKN,SYN1,NDUFAF2,UBQLN1,SCN1A,SMAD3,KCNMA1,CTNNB1,INHA,SRC,ARRB1,DNAJB2,HNRNPK,ERLEC1,CACNB3,DAB2,CACNG2,NR1D1,PPP1R9B,CLTC,SIN3A,RABGAP1L,NRXN3,RIMS2,STXBP1,STX4,GPC6,KMT2A,PKIA,CLIC4,AAK1,SCRIB,WNK3,NLGN1,XPO1,ATP1A1,CACNA1E,EFNA5,MAP2K1,BCL2,TTBK2,PDE4B,THADA,CDH13,PTPN9
GO:BP	regulation of nervous system development	GO:0051960	6.10075e-05	4.21462	451	211	20	21092	LRP8,CTNNB1,ROBO2,XRCC5,LRRN3,NR1D1,DNAJB11,HDAC1,HES5,CTSC,HOOK3,NLGN1,EFNA5,SEMA5A,PLXNA4,NTRK3,EPHA7,MAP2K1,SEMA4A,PARD3
GO:BP	cell growth	GO:0016049	6.21222e-05	4.20675	497	211	21	21092	APP,PRKN,CSNK2A1,SMAD3,CTNNB1,PTCH2,KMT2D,DNAJB2,DAB2,SMARCA2,PPP1R9B,COBL,SIN3A,RIMS2,USP9X,EFNA5,SEMA5A,PLXNA4,EPHA7,BCL2,SEMA4A
GO:BP	plasma membrane bounded cell projection organization	GO:0120036	7.55012e-05	4.12205	1509	211	39	21092	CNTNAP2,APP,PTPN11,PRKN,DCTN1,LRP8,CTNNB1,SRC,ROBO2,DAB2,PTPRO,PPP1R9B,PREX2,COBL,SIN3A,IFT81,HES5,NRXN3,RIMS2,STXBP1,SCRIB,USP9X,NLGN1,EFNA5,SEMA5A,PLXNA4,CFAP70,CPEB3,NTRK3,EPHA7,MAP2K1,BCL2,TTBK2,SEMA4A,PARD3,CDH13,PTPN9,RPS6KA5,DNAH5
GO:BP	neuron differentiation	GO:0030182	8.96795e-05	4.04731	1393	211	37	21092	CNTNAP2,APP,PTPN11,PRKN,SYN1,SOX2,LRP8,CTNNB1,ROBO2,DAB2,PTPRO,PPP1R9B,HDAC1,PREX2,COBL,SIN3A,HES5,NRXN3,RIMS2,STXBP1,SCRIB,USP9X,NLGN1,EFNA5,SEMA5A,PLXNA4,CPEB3,NTRK3,EPHA7,MAP2K1,BCL2,MEIS1,SEMA4A,PARD3,PTPN9,RPS6KA5,MDGA2
GO:BP	regulation of cell communication	GO:0010646	9.45103e-05	4.02452	3363	211	65	21092	APP,PTPN11,PRKN,SYN1,NDUFAF2,SOX2,BTRC,LRP8,UBQLN1,CSNK2A1,SMAD3,PPP2R1B,GRM1,CTNNB1,PTCH2,NCOA3,INHA,SRC,ROBO2,KMT2D,ARRB1,TIAL1,STAU1,HNRNPK,BICC1,DAB2,PTPRO,CACNG2,PLCB4,NR1D1,POGLUT1,PPP1R9B,HDAC1,PREX2,GRIA1,ARHGAP29,SIN3A,IFT81,HES5,GPR137C,NRXN3,RIMS2,CTSC,STXBP1,STX4,GPC6,KMT2A,AAK1,BABAM2,USP9X,NLGN1,EFNA5,SEMA5A,CPEB3,USP2,NTRK3,RALGAPA2,EPHA7,MAP2K1,BCL2,ARHGEF9,PDE4B,CDH13,EMILIN1,ZNR…
GO:BP	positive regulation of biological process	GO:0048518	0.000121841	3.91421	6309	211	100	21092	CNTNAP2,APP,PTPN11,PRKAG2,PRKN,DCTN1,NBN,SOX2,BTRC,ETV6,LRP8,UBQLN1,CSNK2A1,SMAD3,PPP2R1B,KCNMA1,GRM1,IDE,CTNNB1,PTCH2,NCOA3,INHA,NME1,SRC,FBXO33,ROBO2,KMT2D,ARRB1,CKS1B,TIAL1,STAU1,DNAJB2,HNRNPK,HSF2,DDX17,XRCC5,LRRN3,CACNB3,DAB2,RBM5,SRA1,CACNG2,SMARCA2,SF3B4,NR1D1,POGLUT1,PPP1R9B,FMN2,PTRH2,HDAC1,COBL,SIN3A,RPS4X,HES5,GPR137C,EGFLAM,ZBTB18,TFE3,RIMS2,CTSC,STXBP1,STX4,DLX6,KMT2A,SPON1,AAK1,SCRI…
GO:BP	regulation of cellular component organization	GO:0051128	0.000135053	3.8695	2355	211	51	21092	CNTNAP2,APP,PTPN11,PRKN,DCTN1,NBN,LRP8,CSNK2A1,SMAD3,CTNNB1,PTCH2,SRC,ROBO2,ARRB1,DNAJB2,HNRNPK,XRCC5,LRRN3,DAB2,PTPRO,SMARCA2,PPP1R9B,CLTC,COBL,L3MBTL3,SIN3A,RIMS2,STXBP1,GPC6,CLIC4,AAK1,SCRIB,TMEM135,LSM11,NEB,NLGN1,XPO1,SLF2,EFNA5,SEMA5A,PLXNA4,NTRK3,EPHA7,MAP2K1,BCL2,TTBK2,SEMA4A,LRFN5,CDH13,PTPN9,EMILIN1
GO:BP	cell projection organization	GO:0030030	0.000153672	3.8134	1550	211	39	21092	CNTNAP2,APP,PTPN11,PRKN,DCTN1,LRP8,CTNNB1,SRC,ROBO2,DAB2,PTPRO,PPP1R9B,PREX2,COBL,SIN3A,IFT81,HES5,NRXN3,RIMS2,STXBP1,SCRIB,USP9X,NLGN1,EFNA5,SEMA5A,PLXNA4,CFAP70,CPEB3,NTRK3,EPHA7,MAP2K1,BCL2,TTBK2,SEMA4A,PARD3,CDH13,PTPN9,RPS6KA5,DNAH5
GO:BP	cell morphogenesis involved in neuron differentiation	GO:0048667	0.000155258	3.80895	573	211	22	21092	APP,PTPN11,LRP8,ROBO2,PTPRO,PREX2,COBL,SIN3A,NRXN3,STXBP1,SCRIB,USP9X,NLGN1,EFNA5,SEMA5A,PLXNA4,EPHA7,MAP2K1,BCL2,SEMA4A,PARD3,RPS6KA5
GO:BP	regulation of biological quality	GO:0065008	0.000166535	3.77849	3726	211	69	21092	APP,PTPN11,DLD,PRKN,SYN1,DCTN1,NDUFAF2,BTRC,F8,LRP8,SCN1A,SMAD3,PAPSS2,KCNMA1,GRM1,KCNK9,IDE,CTNNB1,INHA,NME1,SRC,ROBO2,STAU1,DNAJB2,LRRN3,CACNB3,DAB2,PTPRO,CACNG2,KLHL3,NR1D1,GRIA1,L3MBTL3,SIN3A,TFE3,NRXN3,RIMS2,STXBP1,TPP2,STX4,GPC6,KMT2A,CLIC4,AAK1,SCRIB,USP9X,WNK3,NEB,NLGN1,ATP1A1,EFNA5,SEMA5A,PLXNA4,CPEB3,USP2,NTRK3,EPHA7,SLC22A17,STAT5B,SCO1,BCL2,NR2F2,SEMA4A,PDE4B,POLD1,THADA,LRFN5,EMILIN1…
GO:BP	regulation of synapse assembly	GO:0051963	0.000186801	3.72862	104	211	10	21092	APP,ROBO2,LRRN3,GPC6,NLGN1,EFNA5,NTRK3,EPHA7,SEMA4A,LRFN5
GO:BP	multicellular organismal process	GO:0032501	0.00019382	3.7126	7463	211	112	21092	CNTNAP2,APP,PTPN11,DLD,PRKN,SYN1,DCTN1,NBN,SOX2,BTRC,F8,ETV6,LRP8,SCN1A,SMAD3,IMPDH2,PAPSS2,KCNMA1,GRM1,IDE,CTNNB1,PTCH2,NCOA3,INHA,NEBL,NME1,SF1,SRC,NEXMIF,ROBO2,KMT2D,ARRB1,TIAL1,HNRNPK,HSF2,BICC1,XRCC5,LRRN3,DAB2,AFF4,PTPRO,CACNG2,SMARCA2,KLHL3,NDUFA12,NR1D1,DNAJB11,POGLUT1,PPP1R9B,FMN2,TUBB2A,HDAC1,PREX2,CLTC,GRIA1,PPIP5K2,COBL,L3MBTL3,AFF3,SIN3A,IFT81,BTBD7,HES5,TFE3,NRXN3,POLA1,RIMS2,CTSC,S…
GO:BP	regulation of biological process	GO:0050789	0.000206221	3.68567	12361	211	160	21092	CNTNAP2,APP,PTPN11,PRKAG2,DLD,PRCC,PRKN,SYN1,DCTN1,NBN,NDUFAF2,SOX2,BTRC,ETV6,LRP8,UBQLN1,SCN1A,CSNK2A1,SMAD3,PPP2R1B,KCNMA1,GRM1,IDE,CTNNB1,PTCH2,NCOA3,INHA,NME1,SF1,SRC,FBXO33,NEXMIF,ROBO2,KMT2D,ARRB1,CKS1B,TIAL1,DST,STAU1,DNAJB2,HNRNPK,HSF2,DDX17,ERLEC1,BICC1,XRCC5,LRRN3,CACNB3,DAB2,AFF4,SALL3,RBM5,SRA1,PTPRO,CACNG2,PRICKLE2,SMARCA2,SF3B4,PLCB4,NR1D1,DNAJB11,POGLUT1,PPP1R9B,FMN2,PTRH2,HDAC1,PR…
GO:BP	positive regulation of nitrogen compound metabolic process	GO:0051173	0.000282118	3.54957	3152	211	61	21092	APP,PTPN11,PRKAG2,PRKN,NBN,SOX2,BTRC,ETV6,LRP8,UBQLN1,CSNK2A1,SMAD3,IDE,CTNNB1,NCOA3,INHA,SRC,FBXO33,KMT2D,ARRB1,CKS1B,DNAJB2,HNRNPK,HSF2,DDX17,XRCC5,DAB2,SRA1,SMARCA2,SF3B4,NR1D1,FMN2,HDAC1,SIN3A,RPS4X,HES5,ZBTB18,TFE3,CTSC,KMT2A,SPON1,BABAM2,TCF20,USP9X,WNK3,ZNF225,SLF2,EFNA5,CPEB3,NTRK3,ZFP90,EPHA7,ATAD2,STAT5B,MAP2K1,BCL2,MEIS1,NR2F2,SRCAP,CDH13,RPS6KA5
GO:BP	regulation of cell junction assembly	GO:1901888	0.000282584	3.54885	203	211	13	21092	CNTNAP2,APP,SMAD3,SRC,ROBO2,LRRN3,GPC6,NLGN1,EFNA5,NTRK3,EPHA7,SEMA4A,LRFN5
GO:BP	cell-cell signaling	GO:0007267	0.00033679	3.47264	1663	211	40	21092	APP,PTPN11,PRKN,SYN1,NDUFAF2,SOX2,BTRC,LRP8,CSNK2A1,SMAD3,GRM1,CTNNB1,INHA,SRC,STAU1,BICC1,CACNB3,DAB2,PTPRO,CACNG2,PRICKLE2,PLCB4,NR1D1,PPP1R9B,HDAC1,GRIA1,NRXN3,RIMS2,STXBP1,STX4,GPC6,KMT2A,SCRIB,SYPL1,NLGN1,CACNA1E,EFNA5,SEMA5A,CPEB3,ZNRF3
GO:BP	regulation of synapse organization	GO:0050807	0.000442147	3.35443	211	211	13	21092	APP,DCTN1,LRP8,ROBO2,LRRN3,PTPRO,GPC6,NLGN1,EFNA5,NTRK3,EPHA7,SEMA4A,LRFN5
GO:BP	animal organ development	GO:0048513	0.000490676	3.30921	3591	211	66	21092	CNTNAP2,APP,PTPN11,DCTN1,SOX2,BTRC,ETV6,LRP8,SMAD3,IMPDH2,PAPSS2,CTNNB1,PTCH2,NCOA3,INHA,NEBL,NME1,SF1,SRC,ROBO2,DDX17,BICC1,XRCC5,DAB2,PTPRO,PRICKLE2,SMARCA2,KLHL3,POGLUT1,PPP1R9B,HDAC1,COBL,L3MBTL3,SIN3A,BTBD7,HES5,EGFLAM,ZBTB18,TFE3,DLX6,GPC6,KMT2A,CLIC4,TTLL5,SCRIB,HOOK3,NEB,NHS,ADGRL3,SEMA5A,PLXNA4,USP2,NTRK3,EPHA7,STAT5B,MAP2K1,BCL2,MEIS1,TTBK2,NR2F2,SEMA4A,EMILIN1,RCOR1,ZNRF3,MDGA2,DNAH5
GO:BP	head development	GO:0060322	0.000511945	3.29078	828	211	26	21092	CNTNAP2,APP,PTPN11,SOX2,LRP8,CTNNB1,SRC,ROBO2,XRCC5,PPP1R9B,HDAC1,SIN3A,HES5,DLX6,SCRIB,HOOK3,ADGRL3,SEMA5A,PLXNA4,EPHA7,MAP2K1,BCL2,MEIS1,TTBK2,NR2F2,DNAH5
GO:BP	central nervous system development	GO:0007417	0.000587239	3.23119	1065	211	30	21092	CNTNAP2,APP,PTPN11,PRKN,DCTN1,SOX2,LRP8,CTNNB1,SRC,ROBO2,XRCC5,NR1D1,PPP1R9B,HDAC1,SIN3A,HES5,SCRIB,HOOK3,ADGRL3,SEMA5A,PLXNA4,NTRK3,EPHA7,MAP2K1,BCL2,MEIS1,TTBK2,NR2F2,MDGA2,DNAH5
GO:BP	brain development	GO:0007420	0.000607177	3.21668	780	211	25	21092	CNTNAP2,APP,PTPN11,SOX2,LRP8,CTNNB1,SRC,ROBO2,XRCC5,PPP1R9B,HDAC1,SIN3A,HES5,SCRIB,HOOK3,ADGRL3,SEMA5A,PLXNA4,EPHA7,MAP2K1,BCL2,MEIS1,TTBK2,NR2F2,DNAH5
GO:BP	regulation of synapse structure or activity	GO:0050803	0.000610512	3.21431	217	211	13	21092	APP,DCTN1,LRP8,ROBO2,LRRN3,PTPRO,GPC6,NLGN1,EFNA5,NTRK3,EPHA7,SEMA4A,LRFN5
GO:BP	positive regulation of macromolecule metabolic process	GO:0010604	0.000623413	3.20522	3535	211	65	21092	APP,PTPN11,PRKAG2,PRKN,NBN,SOX2,BTRC,ETV6,LRP8,UBQLN1,CSNK2A1,SMAD3,IDE,CTNNB1,NCOA3,INHA,SRC,FBXO33,KMT2D,ARRB1,CKS1B,DNAJB2,HNRNPK,HSF2,DDX17,XRCC5,DAB2,SRA1,SMARCA2,SF3B4,NR1D1,FMN2,HDAC1,SIN3A,RPS4X,HES5,ZBTB18,TFE3,CTSC,STX4,KMT2A,SPON1,SCRIB,BABAM2,TCF20,USP9X,WNK3,ZNF225,SLF2,EFNA5,CPEB3,NTRK3,ZFP90,EPHA7,ATAD2,STAT5B,MAP2K1,BCL2,MEIS1,NR2F2,PDE4B,SRCAP,CDH13,RPS6KA5,EMILIN1
GO:BP	developmental cell growth	GO:0048588	0.000792439	3.10103	222	211	13	21092	APP,PRKN,CTNNB1,KMT2D,COBL,SIN3A,RIMS2,USP9X,EFNA5,SEMA5A,PLXNA4,EPHA7,SEMA4A
GO:BP	regulation of cellular metabolic process	GO:0031323	0.000827367	3.0823	5649	211	90	21092	APP,PTPN11,PRKAG2,PRKN,NBN,SOX2,BTRC,ETV6,LRP8,UBQLN1,CSNK2A1,SMAD3,IDE,CTNNB1,NCOA3,INHA,SF1,SRC,KMT2D,ARRB1,CKS1B,TIAL1,DNAJB2,HNRNPK,HSF2,DDX17,XRCC5,DAB2,SALL3,RBM5,SRA1,PTPRO,SMARCA2,SF3B4,NR1D1,PPP1R9B,FMN2,HDAC1,ZNF772,L3MBTL3,AFF3,SIN3A,RPS4X,HES5,ZBTB18,TFE3,INTS2,DLX6,KMT2A,SPON1,PKIA,SCRIB,BABAM2,CLK1,ZNF628,TCF20,USP9X,ZC3H6,WNK3,ZNF225,ZNF461,XPO1,SLF2,ATP1A1,LPGAT1,EFNA5,CPEB3,USP2,…
GO:BP	synapse assembly	GO:0007416	0.000844803	3.07324	187	211	12	21092	APP,ROBO2,LRRN3,NRXN3,GPC6,NLGN1,ADGRL3,EFNA5,NTRK3,EPHA7,SEMA4A,LRFN5
GO:BP	cell morphogenesis	GO:0000902	0.00095662	3.01926	1030	211	29	21092	CNTNAP2,APP,PTPN11,PRKN,LRP8,CTNNB1,SRC,ROBO2,DAB2,PTPRO,PREX2,COBL,SIN3A,NRXN3,RIMS2,STXBP1,CLIC4,SCRIB,USP9X,NLGN1,EFNA5,SEMA5A,PLXNA4,EPHA7,MAP2K1,BCL2,SEMA4A,PARD3,RPS6KA5
GO:BP	axonogenesis	GO:0007409	0.00107538	2.96844	442	211	18	21092	APP,PTPN11,ROBO2,PTPRO,COBL,SIN3A,NRXN3,STXBP1,USP9X,EFNA5,SEMA5A,PLXNA4,EPHA7,MAP2K1,BCL2,SEMA4A,PARD3,RPS6KA5
GO:BP	regulation of transport	GO:0051049	0.0012648	2.89798	1750	211	40	21092	APP,PTPN11,PRKAG2,PRKN,SYN1,NDUFAF2,UBQLN1,SCN1A,SMAD3,KCNMA1,CTNNB1,INHA,SRC,ARRB1,HNRNPK,ERLEC1,CACNB3,DAB2,CACNG2,NR1D1,NRXN3,RIMS2,STXBP1,STX4,KMT2A,PKIA,CLIC4,AAK1,SCRIB,WNK3,NLGN1,XPO1,ATP1A1,CACNA1E,EFNA5,MAP2K1,BCL2,PDE4B,THADA,CDH13
GO:BP	cell differentiation	GO:0030154	0.00131637	2.88062	4256	211	73	21092	CNTNAP2,APP,PTPN11,DLD,PRKN,SYN1,SOX2,ETV6,LRP8,SMAD3,CTNNB1,PTCH2,NCOA3,INHA,NEBL,NME1,SF1,SRC,NEXMIF,ROBO2,KMT2D,TIAL1,DDX17,XRCC5,DAB2,AFF4,SRA1,PTPRO,SMARCA2,NR1D1,DNAJB11,PPP1R9B,FMN2,TUBB2A,HDAC1,PREX2,CLTC,COBL,L3MBTL3,SIN3A,IFT81,HES5,TFE3,NRXN3,RIMS2,STXBP1,DLX6,CLIC4,SCRIB,HOOK3,USP9X,NEB,NLGN1,NHS,ADGRL3,EFNA5,SEMA5A,PLXNA4,CPEB3,NTRK3,EPHA7,STAT5B,MAP2K1,BCL2,MEIS1,NR2F2,SEMA4A,PARD3,…
GO:BP	modulation of chemical synaptic transmission	GO:0050804	0.00148518	2.82822	452	211	18	21092	APP,PRKN,SYN1,LRP8,GRM1,SRC,STAU1,CACNG2,PLCB4,PPP1R9B,GRIA1,NRXN3,RIMS2,STXBP1,STX4,KMT2A,NLGN1,CPEB3
GO:BP	regulation of trans-synaptic signaling	GO:0099177	0.00153313	2.81442	453	211	18	21092	APP,PRKN,SYN1,LRP8,GRM1,SRC,STAU1,CACNG2,PLCB4,PPP1R9B,GRIA1,NRXN3,RIMS2,STXBP1,STX4,KMT2A,NLGN1,CPEB3
GO:BP	cellular developmental process	GO:0048869	0.00164403	2.78409	4280	211	73	21092	CNTNAP2,APP,PTPN11,DLD,PRKN,SYN1,SOX2,ETV6,LRP8,SMAD3,CTNNB1,PTCH2,NCOA3,INHA,NEBL,NME1,SF1,SRC,NEXMIF,ROBO2,KMT2D,TIAL1,DDX17,XRCC5,DAB2,AFF4,SRA1,PTPRO,SMARCA2,NR1D1,DNAJB11,PPP1R9B,FMN2,TUBB2A,HDAC1,PREX2,CLTC,COBL,L3MBTL3,SIN3A,IFT81,HES5,TFE3,NRXN3,RIMS2,STXBP1,DLX6,CLIC4,SCRIB,HOOK3,USP9X,NEB,NLGN1,NHS,ADGRL3,EFNA5,SEMA5A,PLXNA4,CPEB3,NTRK3,EPHA7,STAT5B,MAP2K1,BCL2,MEIS1,NR2F2,SEMA4A,PARD3,…
GO:BP	positive regulation of cellular metabolic process	GO:0031325	0.00189107	2.72329	3094	211	58	21092	APP,PTPN11,PRKAG2,PRKN,NBN,SOX2,BTRC,ETV6,LRP8,UBQLN1,SMAD3,CTNNB1,NCOA3,INHA,SRC,KMT2D,ARRB1,CKS1B,DNAJB2,HNRNPK,HSF2,DDX17,XRCC5,DAB2,SRA1,SMARCA2,SF3B4,NR1D1,FMN2,HDAC1,SIN3A,RPS4X,HES5,ZBTB18,TFE3,KMT2A,SCRIB,BABAM2,TCF20,USP9X,WNK3,ZNF225,SLF2,LPGAT1,EFNA5,CPEB3,NTRK3,ZFP90,EPHA7,ATAD2,STAT5B,MAP2K1,BCL2,MEIS1,NR2F2,SRCAP,CDH13,RPS6KA5
GO:BP	nucleobase-containing compound biosynthetic process	GO:0034654	0.00190029	2.72118	4049	211	70	21092	APP,PRKAG2,DLD,PRKN,SOX2,BTRC,ETV6,LRP8,SMAD3,IMPDH2,PAPSS2,CTNNB1,NCOA3,NME1,SF1,SRC,POLR2A,KMT2D,ARRB1,CKS1B,TIAL1,HNRNPK,HSF2,DDX17,XRCC5,DAB2,SALL3,GTF3C3,SRA1,SMARCA2,NDUFA12,NR1D1,NADK2,HDAC1,ZNF772,L3MBTL3,AFF3,SIN3A,HES5,ZBTB18,TFE3,POLA1,INTS2,DLX6,KMT2A,PKIA,ZNF628,TCF20,USP9X,ZC3H6,ZNF225,ZNF461,CPEB3,USP2,ZFP90,ZNF234,ZNF283,CHD1,ATAD2,STAT5B,MAP2K1,MEIS1,MAGED2,NR2F2,ITGB3BP,SRCAP,PO…
GO:BP	cell population proliferation	GO:0008283	0.00194485	2.71111	1988	211	43	21092	CNTNAP2,APP,NBN,SOX2,BTRC,ETV6,CSNK2A1,SMAD3,IMPDH2,CTNNB1,INHA,NME1,SF1,SRC,KMT2D,CKS1B,TIAL1,DNAJB2,XRCC5,DAB2,RBM5,SMARCA2,NR1D1,PPP1R9B,HDAC1,RPS4X,HES5,STX4,DLX6,KMT2A,SCRIB,HOOK3,SEMA5A,NTRK3,STAT5B,MAP2K1,BCL2,MEIS1,NR2F2,CDH13,EMILIN1,ZNRF3,DLEC1
GO:BP	chemical synaptic transmission	GO:0007268	0.00202824	2.69288	721	211	23	21092	APP,PRKN,SYN1,LRP8,GRM1,CTNNB1,SRC,STAU1,CACNB3,CACNG2,PLCB4,PPP1R9B,GRIA1,NRXN3,RIMS2,STXBP1,STX4,KMT2A,SCRIB,SYPL1,NLGN1,CACNA1E,CPEB3
GO:BP	anterograde trans-synaptic signaling	GO:0098916	0.00202824	2.69288	721	211	23	21092	APP,PRKN,SYN1,LRP8,GRM1,CTNNB1,SRC,STAU1,CACNB3,CACNG2,PLCB4,PPP1R9B,GRIA1,NRXN3,RIMS2,STXBP1,STX4,KMT2A,SCRIB,SYPL1,NLGN1,CACNA1E,CPEB3
GO:BP	regulation of neurogenesis	GO:0050767	0.00215547	2.66646	370	211	16	21092	LRP8,CTNNB1,ROBO2,XRCC5,NR1D1,DNAJB11,HDAC1,HES5,HOOK3,EFNA5,SEMA5A,PLXNA4,NTRK3,EPHA7,MAP2K1,SEMA4A
GO:BP	regulation of primary metabolic process	GO:0080090	0.00242957	2.61447	5869	211	91	21092	APP,PTPN11,PRKAG2,PRKN,NBN,SOX2,BTRC,ETV6,LRP8,UBQLN1,CSNK2A1,SMAD3,IDE,CTNNB1,NCOA3,INHA,SF1,SRC,FBXO33,KMT2D,ARRB1,CKS1B,TIAL1,DNAJB2,HNRNPK,HSF2,DDX17,XRCC5,DAB2,SALL3,RBM5,SRA1,PTPRO,SMARCA2,SF3B4,NR1D1,PPP1R9B,FMN2,HDAC1,CLTC,ZNF772,L3MBTL3,AFF3,SIN3A,RPS4X,HES5,ZBTB18,TFE3,INTS2,CTSC,DLX6,KMT2A,SPON1,PKIA,BABAM2,CLK1,ZNF628,TCF20,USP9X,ZC3H6,WNK3,ZNF225,ZNF461,XPO1,SLF2,ATP1A1,LPGAT1,EFNA5,…
GO:BP	trans-synaptic signaling	GO:0099537	0.00244719	2.61133	729	211	23	21092	APP,PRKN,SYN1,LRP8,GRM1,CTNNB1,SRC,STAU1,CACNB3,CACNG2,PLCB4,PPP1R9B,GRIA1,NRXN3,RIMS2,STXBP1,STX4,KMT2A,SCRIB,SYPL1,NLGN1,CACNA1E,CPEB3
GO:BP	regulation of nitrogen compound metabolic process	GO:0051171	0.00271217	2.56668	5706	211	89	21092	APP,PTPN11,PRKAG2,PRKN,NBN,SOX2,BTRC,ETV6,LRP8,UBQLN1,CSNK2A1,SMAD3,IDE,CTNNB1,NCOA3,INHA,SF1,SRC,FBXO33,KMT2D,ARRB1,CKS1B,TIAL1,DNAJB2,HNRNPK,HSF2,DDX17,XRCC5,DAB2,SALL3,RBM5,SRA1,PTPRO,SMARCA2,SF3B4,NR1D1,PPP1R9B,FMN2,HDAC1,CLTC,ZNF772,L3MBTL3,AFF3,SIN3A,RPS4X,HES5,ZBTB18,TFE3,INTS2,CTSC,DLX6,KMT2A,SPON1,PKIA,BABAM2,CLK1,ZNF628,TCF20,USP9X,ZC3H6,WNK3,ZNF225,ZNF461,XPO1,SLF2,EFNA5,CPEB3,USP2,NTR…
GO:BP	regulation of protein localization	GO:0032880	0.00291955	2.53468	850	211	25	21092	PTPN11,PRKN,NDUFAF2,SMAD3,CTNNB1,SRC,DNAJB2,ERLEC1,DAB2,CACNG2,NR1D1,PPP1R9B,CLTC,SIN3A,RABGAP1L,STX4,GPC6,PKIA,AAK1,WNK3,XPO1,EFNA5,BCL2,TTBK2,PTPN9
GO:BP	growth	GO:0040007	0.00319344	2.49574	972	211	27	21092	APP,PTPN11,PRKN,NBN,SOX2,CSNK2A1,SMAD3,CTNNB1,PTCH2,SRC,KMT2D,DNAJB2,DAB2,SMARCA2,PPP1R9B,COBL,SIN3A,RIMS2,CLIC4,USP9X,EFNA5,SEMA5A,PLXNA4,EPHA7,STAT5B,BCL2,SEMA4A
GO:BP	organic cyclic compound biosynthetic process	GO:1901362	0.00348296	2.45805	4280	211	72	21092	APP,PRKAG2,DLD,PRKN,SOX2,BTRC,ETV6,LRP8,SMAD3,IMPDH2,PAPSS2,CTNNB1,NCOA3,NME1,SF1,SRC,POLR2A,KMT2D,ARRB1,CKS1B,TIAL1,HNRNPK,HSF2,DDX17,XRCC5,DAB2,SALL3,GTF3C3,SRA1,SMARCA2,NDUFA12,NR1D1,NADK2,HDAC1,ZNF772,L3MBTL3,AFF3,SIN3A,HES5,ZBTB18,TFE3,POLA1,INTS2,DLX6,KMT2A,PKIA,ZNF628,TCF20,USP9X,ZC3H6,ZNF225,ZNF461,ATP1A1,CPEB3,USP2,ZFP90,ZNF234,ZNF283,CHD1,ATAD2,STAT5B,MAP2K1,ABCD3,MEIS1,MAGED2,NR2F2,ITG…
GO:BP	negative regulation of biological process	GO:0048519	0.00357067	2.44725	5918	211	91	21092	APP,PTPN11,PRKAG2,PRKN,NBN,NDUFAF2,SOX2,BTRC,ETV6,UBQLN1,CSNK2A1,SMAD3,KCNMA1,CTNNB1,PTCH2,INHA,NME1,SF1,SRC,NEXMIF,ROBO2,KMT2D,ARRB1,TIAL1,DNAJB2,HNRNPK,DDX17,ERLEC1,BICC1,XRCC5,DAB2,RBM5,SRA1,PTPRO,SMARCA2,NR1D1,DNAJB11,PPP1R9B,FMN2,PTRH2,HDAC1,CLTC,GRIA1,L3MBTL3,SIN3A,HES5,ZBTB18,TFE3,CTSC,STXBP1,KMT2A,SPON1,PKIA,CLIC4,EDC4,SCRIB,PNRC2,HOOK3,BABAM2,USP9X,ZC3H6,WNK3,NLGN1,ATP1A1,EFNA5,SEMA5A,PL…
GO:BP	macromolecule modification	GO:0043412	0.00364434	2.43838	3874	211	67	21092	APP,PTPN11,PRKAG2,DLD,PRKN,NBN,BTRC,LRP8,UBQLN1,CSNK2A1,PPP2R1B,CTNNB1,NCOA3,INHA,SRC,FBXO33,KMT2D,ARRB1,CKS1B,DNAJB2,XRCC5,DAB2,PTPRO,KLHL3,PUS3,DNAJB11,POGLUT1,STT3B,PPP1R9B,RSPRY1,HDAC1,SIN3A,HES5,EGFLAM,ZDHHC20,TPP2,KMT2A,PKIA,AAK1,TTLL5,UBE2W,ABHD10,BABAM2,CLK1,USP9X,WNK3,LMTK3,SLF2,EFNA5,USP2,NTRK3,EPHA7,MAP2K1,BCL2,PPP2R2B,TTBK2,NR2F2,SRCAP,THADA,PARD3,RSRC1,PTPN9,RPS6KA5,EMILIN1,RBM15B,RC…
GO:BP	heterocycle biosynthetic process	GO:0018130	0.00372357	2.42904	4122	211	70	21092	APP,PRKAG2,DLD,PRKN,SOX2,BTRC,ETV6,LRP8,SMAD3,IMPDH2,PAPSS2,CTNNB1,NCOA3,NME1,SF1,SRC,POLR2A,KMT2D,ARRB1,CKS1B,TIAL1,HNRNPK,HSF2,DDX17,XRCC5,DAB2,SALL3,GTF3C3,SRA1,SMARCA2,NDUFA12,NR1D1,NADK2,HDAC1,ZNF772,L3MBTL3,AFF3,SIN3A,HES5,ZBTB18,TFE3,POLA1,INTS2,DLX6,KMT2A,PKIA,ZNF628,TCF20,USP9X,ZC3H6,ZNF225,ZNF461,CPEB3,USP2,ZFP90,ZNF234,ZNF283,CHD1,ATAD2,STAT5B,MAP2K1,MEIS1,MAGED2,NR2F2,ITGB3BP,SRCAP,PO…
GO:BP	aromatic compound biosynthetic process	GO:0019438	0.00411198	2.38595	4133	211	70	21092	APP,PRKAG2,DLD,PRKN,SOX2,BTRC,ETV6,LRP8,SMAD3,IMPDH2,PAPSS2,CTNNB1,NCOA3,NME1,SF1,SRC,POLR2A,KMT2D,ARRB1,CKS1B,TIAL1,HNRNPK,HSF2,DDX17,XRCC5,DAB2,SALL3,GTF3C3,SRA1,SMARCA2,NDUFA12,NR1D1,NADK2,HDAC1,ZNF772,L3MBTL3,AFF3,SIN3A,HES5,ZBTB18,TFE3,POLA1,INTS2,DLX6,KMT2A,PKIA,ZNF628,TCF20,USP9X,ZC3H6,ZNF225,ZNF461,CPEB3,USP2,ZFP90,ZNF234,ZNF283,CHD1,ATAD2,STAT5B,MAP2K1,MEIS1,MAGED2,NR2F2,ITGB3BP,SRCAP,PO…
GO:BP	synaptic signaling	GO:0099536	0.0042262	2.37405	753	211	23	21092	APP,PRKN,SYN1,LRP8,GRM1,CTNNB1,SRC,STAU1,CACNB3,CACNG2,PLCB4,PPP1R9B,GRIA1,NRXN3,RIMS2,STXBP1,STX4,KMT2A,SCRIB,SYPL1,NLGN1,CACNA1E,CPEB3
GO:BP	positive regulation of nucleobase-containing compound metabolic process	GO:0045935	0.00425255	2.37135	2048	211	43	21092	APP,PRKN,NBN,SOX2,BTRC,ETV6,SMAD3,CTNNB1,NCOA3,SRC,KMT2D,ARRB1,HNRNPK,HSF2,DDX17,XRCC5,DAB2,SRA1,SMARCA2,SF3B4,NR1D1,FMN2,HDAC1,SIN3A,HES5,ZBTB18,TFE3,KMT2A,BABAM2,TCF20,USP9X,ZNF225,SLF2,CPEB3,ZFP90,ATAD2,STAT5B,MAP2K1,MEIS1,NR2F2,SRCAP,CDH13,RPS6KA5
GO:BP	negative regulation of developmental process	GO:0051093	0.00442165	2.35442	929	211	26	21092	APP,PTPN11,PRKN,SOX2,SMAD3,CTNNB1,INHA,ROBO2,SRA1,SMARCA2,NR1D1,DNAJB11,HDAC1,SIN3A,HES5,HOOK3,NLGN1,EFNA5,SEMA5A,NTRK3,EPHA7,STAT5B,BCL2,MEIS1,SEMA4A,EMILIN1
GO:BP	developmental growth	GO:0048589	0.00458819	2.33836	646	211	21	21092	APP,PTPN11,PRKN,NBN,SOX2,SMAD3,CTNNB1,SRC,KMT2D,COBL,SIN3A,RIMS2,CLIC4,USP9X,EFNA5,SEMA5A,PLXNA4,EPHA7,STAT5B,BCL2,SEMA4A
GO:BP	axon development	GO:0061564	0.00467453	2.33026	490	211	18	21092	APP,PTPN11,ROBO2,PTPRO,COBL,SIN3A,NRXN3,STXBP1,USP9X,EFNA5,SEMA5A,PLXNA4,EPHA7,MAP2K1,BCL2,SEMA4A,PARD3,RPS6KA5
GO:BP	anatomical structure morphogenesis	GO:0009653	0.0048432	2.31487	2722	211	52	21092	CNTNAP2,APP,PTPN11,DLD,PRKN,SOX2,BTRC,LRP8,SMAD3,PPP2R1B,CTNNB1,NEBL,SRC,ROBO2,DAB2,PTPRO,PRICKLE2,KLHL3,POGLUT1,HDAC1,PREX2,COBL,AFF3,SIN3A,BTBD7,HES5,EGFLAM,NRXN3,RIMS2,STXBP1,DLX6,GPC6,CLIC4,SCRIB,TMEM135,USP9X,NEB,NLGN1,EFNA5,SEMA5A,PLXNA4,EPHA7,MAP2K1,BCL2,MEIS1,NR2F2,SEMA4A,PARD3,CDH13,RPS6KA5,EMILIN1,ZNRF3
GO:BP	forebrain development	GO:0030900	0.00487143	2.31234	394	211	16	21092	CNTNAP2,APP,SOX2,LRP8,CTNNB1,SRC,ROBO2,PPP1R9B,HDAC1,SIN3A,HES5,HOOK3,SEMA5A,PLXNA4,NR2F2,DNAH5
GO:BP	negative regulation of nervous system development	GO:0051961	0.00497679	2.30305	148	211	10	21092	CTNNB1,ROBO2,NR1D1,DNAJB11,HES5,HOOK3,SEMA5A,NTRK3,EPHA7,SEMA4A
GO:BP	regulation of developmental process	GO:0050793	0.00498344	2.30247	2499	211	49	21092	APP,PTPN11,PRKN,SOX2,LRP8,SMAD3,CTNNB1,PTCH2,NCOA3,INHA,SRC,ROBO2,DDX17,XRCC5,LRRN3,DAB2,SRA1,PRICKLE2,SMARCA2,NR1D1,DNAJB11,POGLUT1,HDAC1,COBL,SIN3A,BTBD7,HES5,TFE3,RIMS2,CTSC,GPC6,TMEM135,HOOK3,NLGN1,EFNA5,SEMA5A,PLXNA4,CPEB3,NTRK3,EPHA7,STAT5B,MAP2K1,BCL2,MEIS1,SEMA4A,PARD3,EMILIN1,RCOR1,ZNRF3
GO:BP	positive regulation of metabolic process	GO:0009893	0.00613305	2.21232	3849	211	66	21092	APP,PTPN11,PRKAG2,PRKN,NBN,SOX2,BTRC,ETV6,LRP8,UBQLN1,CSNK2A1,SMAD3,IDE,CTNNB1,NCOA3,INHA,SRC,FBXO33,KMT2D,ARRB1,CKS1B,DNAJB2,HNRNPK,HSF2,DDX17,XRCC5,DAB2,SRA1,SMARCA2,SF3B4,NR1D1,FMN2,HDAC1,SIN3A,RPS4X,HES5,ZBTB18,TFE3,CTSC,STX4,KMT2A,SPON1,SCRIB,BABAM2,TCF20,USP9X,WNK3,ZNF225,SLF2,LPGAT1,EFNA5,CPEB3,NTRK3,ZFP90,EPHA7,ATAD2,STAT5B,MAP2K1,BCL2,MEIS1,NR2F2,PDE4B,SRCAP,CDH13,RPS6KA5,EMILIN1
GO:BP	cell adhesion	GO:0007155	0.00618876	2.2084	1521	211	35	21092	CNTNAP2,APP,PTPN11,SOX2,SMAD3,CTNNB1,SRC,NEXMIF,ROBO2,DST,DAB2,PTPRO,SMARCA2,HES5,EGFLAM,TFE3,NRXN3,STXBP1,STX4,GPC6,SPON1,SCRIB,NLGN1,ADGRL3,EFNA5,SEMA5A,PLXNA4,EPHA7,STAT5B,BCL2,ITGB3BP,LRFN5,PARD3,CDH13,EMILIN1
GO:BP	regulation of molecular function	GO:0065009	0.0063395	2.19794	3055	211	56	21092	APP,PRKAG2,PRKN,NBN,SOX2,BTRC,LRP8,UBQLN1,CSNK2A1,SMAD3,PPP2R1B,IDE,CTNNB1,NCOA3,NME1,SRC,ARRB1,CKS1B,DNAJB2,HNRNPK,XRCC5,CACNB3,DAB2,PTPRO,CACNG2,DNAJB11,PPP1R9B,HDAC1,PREX2,ARHGAP29,SIN3A,RABGAP1L,STX4,KMT2A,SPON1,PKIA,SCRIB,USP9X,WNK3,NLGN1,EFNA5,PLXNA4,NTRK3,ZFP90,RALGAPA2,EPHA7,MAP2K1,BCL2,PPP2R2B,TTBK2,NR2F2,ARHGEF9,PDE4B,THADA,RPS6KA5,NRBF2
GO:BP	regulation of cellular localization	GO:0060341	0.00786342	2.10439	959	211	26	21092	PTPN11,PRKN,NDUFAF2,SMAD3,CTNNB1,SRC,DNAJB2,ERLEC1,DAB2,CACNG2,NR1D1,PPP1R9B,CLTC,SIN3A,RABGAP1L,STX4,GPC6,PKIA,AAK1,WNK3,XPO1,EFNA5,MAP2K1,BCL2,TTBK2,PTPN9
GO:BP	regulation of cell development	GO:0060284	0.00861398	2.0648	512	211	18	21092	LRP8,CTNNB1,ROBO2,XRCC5,DAB2,NR1D1,DNAJB11,HDAC1,HES5,HOOK3,EFNA5,SEMA5A,PLXNA4,NTRK3,EPHA7,MAP2K1,BCL2,SEMA4A
GO:BP	protein modification process	GO:0036211	0.0091517	2.0385	3649	211	63	21092	APP,PTPN11,PRKAG2,DLD,PRKN,NBN,BTRC,LRP8,UBQLN1,CSNK2A1,PPP2R1B,CTNNB1,NCOA3,INHA,SRC,FBXO33,KMT2D,ARRB1,CKS1B,DNAJB2,XRCC5,DAB2,PTPRO,KLHL3,POGLUT1,STT3B,PPP1R9B,RSPRY1,HDAC1,SIN3A,HES5,EGFLAM,ZDHHC20,TPP2,KMT2A,PKIA,AAK1,TTLL5,UBE2W,ABHD10,BABAM2,CLK1,USP9X,WNK3,LMTK3,SLF2,EFNA5,USP2,NTRK3,EPHA7,MAP2K1,BCL2,PPP2R2B,TTBK2,NR2F2,SRCAP,PARD3,RSRC1,PTPN9,RPS6KA5,EMILIN1,RCOR1,ZNRF3
GO:BP	peptidyl-amino acid modification	GO:0018193	0.00970663	2.01293	1286	211	31	21092	APP,PTPN11,PRKAG2,LRP8,CSNK2A1,CTNNB1,NCOA3,SRC,KMT2D,ARRB1,POGLUT1,STT3B,SIN3A,HES5,EGFLAM,ZDHHC20,KMT2A,TTLL5,CLK1,WNK3,LMTK3,SLF2,EFNA5,NTRK3,EPHA7,MAP2K1,BCL2,TTBK2,SRCAP,PARD3,RPS6KA5
GO:BP	developmental growth involved in morphogenesis	GO:0060560	0.0101333	1.99425	237	211	12	21092	APP,PRKN,CTNNB1,COBL,SIN3A,RIMS2,USP9X,EFNA5,SEMA5A,PLXNA4,EPHA7,SEMA4A
GO:BP	regulation of Wnt signaling pathway	GO:0030111	0.0107903	1.96696	325	211	14	21092	APP,PRKN,SOX2,BTRC,CSNK2A1,SMAD3,CTNNB1,SRC,BICC1,DAB2,PTPRO,HDAC1,SEMA5A,ZNRF3
GO:BP	regulation of nucleobase-containing compound metabolic process	GO:0019219	0.011869	1.92559	4088	211	68	21092	APP,PRKAG2,PRKN,NBN,SOX2,BTRC,ETV6,LRP8,SMAD3,CTNNB1,NCOA3,SF1,SRC,KMT2D,ARRB1,CKS1B,TIAL1,HNRNPK,HSF2,DDX17,XRCC5,DAB2,SALL3,RBM5,SRA1,SMARCA2,SF3B4,NR1D1,FMN2,HDAC1,ZNF772,L3MBTL3,AFF3,SIN3A,HES5,ZBTB18,TFE3,INTS2,DLX6,KMT2A,PKIA,BABAM2,CLK1,ZNF628,TCF20,USP9X,ZC3H6,ZNF225,ZNF461,SLF2,CPEB3,USP2,ZFP90,ZNF234,ZNF283,CHD1,ATAD2,STAT5B,MAP2K1,MEIS1,MAGED2,NR2F2,ITGB3BP,SRCAP,CDH13,RPS6KA5,RBM15B,R…
GO:BP	regulation of membrane potential	GO:0042391	0.0123853	1.9071	424	211	16	21092	APP,DLD,PRKN,SCN1A,KCNMA1,GRM1,KCNK9,SRC,CACNB3,CACNG2,GRIA1,RIMS2,KMT2A,NLGN1,ATP1A1,BCL2
GO:BP	regulation of signal transduction	GO:0009966	0.012676	1.89702	2968	211	54	21092	APP,PTPN11,PRKN,SOX2,BTRC,UBQLN1,CSNK2A1,SMAD3,PPP2R1B,GRM1,CTNNB1,PTCH2,NCOA3,INHA,SRC,ROBO2,KMT2D,ARRB1,TIAL1,HNRNPK,BICC1,DAB2,PTPRO,CACNG2,NR1D1,POGLUT1,PPP1R9B,HDAC1,PREX2,ARHGAP29,SIN3A,IFT81,HES5,GPR137C,RIMS2,CTSC,STX4,GPC6,AAK1,BABAM2,USP9X,NLGN1,SEMA5A,USP2,NTRK3,RALGAPA2,EPHA7,MAP2K1,BCL2,ARHGEF9,PDE4B,CDH13,EMILIN1,ZNRF3
GO:BP	positive regulation of molecular function	GO:0044093	0.0129833	1.88662	1573	211	35	21092	APP,PRKAG2,PRKN,NBN,BTRC,LRP8,SMAD3,IDE,CTNNB1,NCOA3,NME1,SRC,CKS1B,DNAJB2,HNRNPK,XRCC5,CACNB3,CACNG2,DNAJB11,HDAC1,ARHGAP29,RABGAP1L,STX4,KMT2A,SPON1,SCRIB,USP9X,WNK3,EFNA5,NTRK3,RALGAPA2,EPHA7,MAP2K1,BCL2,RPS6KA5
GO:BP	RNA biosynthetic process	GO:0032774	0.014041	1.8526	3615	211	62	21092	APP,PRKN,SOX2,BTRC,ETV6,LRP8,SMAD3,CTNNB1,NCOA3,SF1,SRC,POLR2A,KMT2D,ARRB1,CKS1B,TIAL1,HNRNPK,HSF2,DDX17,XRCC5,DAB2,SALL3,GTF3C3,SRA1,SMARCA2,NR1D1,HDAC1,ZNF772,L3MBTL3,AFF3,SIN3A,HES5,ZBTB18,TFE3,POLA1,INTS2,DLX6,KMT2A,PKIA,ZNF628,TCF20,USP9X,ZC3H6,ZNF225,ZNF461,CPEB3,USP2,ZFP90,ZNF234,ZNF283,CHD1,ATAD2,STAT5B,MAP2K1,MEIS1,MAGED2,NR2F2,ITGB3BP,SRCAP,CDH13,RPS6KA5,RCOR1
GO:BP	regulation of cell growth	GO:0001558	0.014348	1.84321	429	211	16	21092	PRKN,CSNK2A1,SMAD3,PTCH2,DNAJB2,DAB2,SMARCA2,PPP1R9B,SIN3A,RIMS2,EFNA5,SEMA5A,PLXNA4,EPHA7,BCL2,SEMA4A
GO:BP	negative chemotaxis	GO:0050919	0.0161389	1.79213	48	211	6	21092	ROBO2,EFNA5,SEMA5A,PLXNA4,EPHA7,SEMA4A
GO:BP	regulation of canonical Wnt signaling pathway	GO:0060828	0.0174311	1.75867	250	211	12	21092	PRKN,SOX2,BTRC,SMAD3,CTNNB1,SRC,BICC1,DAB2,PTPRO,HDAC1,SEMA5A,ZNRF3
GO:BP	regulation of response to stimulus	GO:0048583	0.0178613	1.74809	3970	211	66	21092	APP,PTPN11,PRKN,NDUFAF2,SOX2,BTRC,LRP8,UBQLN1,CSNK2A1,SMAD3,PPP2R1B,GRM1,CTNNB1,PTCH2,NCOA3,INHA,SRC,ROBO2,KMT2D,ARRB1,TIAL1,HNRNPK,BICC1,XRCC5,CACNB3,DAB2,PTPRO,CACNG2,SMARCA2,NR1D1,POGLUT1,PPP1R9B,FMN2,HDAC1,PREX2,ARHGAP29,SIN3A,IFT81,HES5,GPR137C,RIMS2,CTSC,STXBP1,STX4,GPC6,AAK1,BABAM2,USP9X,NLGN1,SLF2,SEMA5A,PLXNA4,USP2,NTRK3,RALGAPA2,EPHA7,STAT5B,MAP2K1,BCL2,ARHGEF9,SEMA4A,PDE4B,LRFN5,CDH13,…
GO:BP	regulation of multicellular organismal development	GO:2000026	0.0182887	1.73782	1394	211	32	21092	PTPN11,LRP8,SMAD3,CTNNB1,PTCH2,NCOA3,INHA,ROBO2,XRCC5,LRRN3,SMARCA2,NR1D1,DNAJB11,POGLUT1,HDAC1,HES5,TFE3,CTSC,HOOK3,NLGN1,EFNA5,SEMA5A,PLXNA4,NTRK3,EPHA7,STAT5B,MAP2K1,MEIS1,SEMA4A,PARD3,EMILIN1,RCOR1
GO:BP	positive regulation of protein modification process	GO:0031401	0.0197152	1.7052	1010	211	26	21092	APP,PTPN11,PRKAG2,PRKN,NBN,BTRC,LRP8,UBQLN1,CTNNB1,INHA,SRC,FBXO33,ARRB1,CKS1B,DNAJB2,XRCC5,DAB2,HES5,KMT2A,WNK3,EFNA5,NTRK3,EPHA7,MAP2K1,BCL2,RPS6KA5
GO:BP	cell surface receptor signaling pathway involved in cell-cell signaling	GO:1905114	0.0234333	1.63017	551	211	18	21092	APP,PRKN,SOX2,BTRC,CSNK2A1,SMAD3,CTNNB1,SRC,BICC1,DAB2,PTPRO,PRICKLE2,HDAC1,RIMS2,GPC6,NLGN1,SEMA5A,ZNRF3
GO:BP	DNA-templated transcription	GO:0006351	0.0242406	1.61546	3595	211	61	21092	APP,PRKN,SOX2,BTRC,ETV6,LRP8,SMAD3,CTNNB1,NCOA3,SF1,SRC,POLR2A,KMT2D,ARRB1,CKS1B,TIAL1,HNRNPK,HSF2,DDX17,XRCC5,DAB2,SALL3,GTF3C3,SRA1,SMARCA2,NR1D1,HDAC1,ZNF772,L3MBTL3,AFF3,SIN3A,HES5,ZBTB18,TFE3,INTS2,DLX6,KMT2A,PKIA,ZNF628,TCF20,USP9X,ZC3H6,ZNF225,ZNF461,CPEB3,USP2,ZFP90,ZNF234,ZNF283,CHD1,ATAD2,STAT5B,MAP2K1,MEIS1,MAGED2,NR2F2,ITGB3BP,SRCAP,CDH13,RPS6KA5,RCOR1
GO:BP	nucleic acid-templated transcription	GO:0097659	0.024455	1.61163	3596	211	61	21092	APP,PRKN,SOX2,BTRC,ETV6,LRP8,SMAD3,CTNNB1,NCOA3,SF1,SRC,POLR2A,KMT2D,ARRB1,CKS1B,TIAL1,HNRNPK,HSF2,DDX17,XRCC5,DAB2,SALL3,GTF3C3,SRA1,SMARCA2,NR1D1,HDAC1,ZNF772,L3MBTL3,AFF3,SIN3A,HES5,ZBTB18,TFE3,INTS2,DLX6,KMT2A,PKIA,ZNF628,TCF20,USP9X,ZC3H6,ZNF225,ZNF461,CPEB3,USP2,ZFP90,ZNF234,ZNF283,CHD1,ATAD2,STAT5B,MAP2K1,MEIS1,MAGED2,NR2F2,ITGB3BP,SRCAP,CDH13,RPS6KA5,RCOR1
GO:BP	Wnt signaling pathway	GO:0016055	0.0245944	1.60916	448	211	16	21092	APP,PRKN,SOX2,BTRC,CSNK2A1,SMAD3,CTNNB1,SRC,BICC1,DAB2,PTPRO,PRICKLE2,HDAC1,GPC6,SEMA5A,ZNRF3
GO:BP	cell-cell signaling by wnt	GO:0198738	0.0259837	1.5853	450	211	16	21092	APP,PRKN,SOX2,BTRC,CSNK2A1,SMAD3,CTNNB1,SRC,BICC1,DAB2,PTPRO,PRICKLE2,HDAC1,GPC6,SEMA5A,ZNRF3
GO:BP	rhythmic process	GO:0048511	0.0272362	1.56485	306	211	13	21092	BTRC,CSNK2A1,IMPDH2,SRC,ROBO2,NR1D1,HDAC1,SIN3A,KMT2A,USP9X,NLGN1,USP2,STAT5B
GO:BP	regulation of RNA metabolic process	GO:0051252	0.0279519	1.55359	3775	211	63	21092	APP,PRKN,SOX2,BTRC,ETV6,LRP8,SMAD3,CTNNB1,NCOA3,SF1,SRC,KMT2D,ARRB1,CKS1B,TIAL1,HNRNPK,HSF2,DDX17,XRCC5,DAB2,SALL3,RBM5,SRA1,SMARCA2,SF3B4,NR1D1,HDAC1,ZNF772,L3MBTL3,AFF3,SIN3A,HES5,ZBTB18,TFE3,INTS2,DLX6,KMT2A,PKIA,CLK1,ZNF628,TCF20,USP9X,ZC3H6,ZNF225,ZNF461,CPEB3,USP2,ZFP90,ZNF234,ZNF283,CHD1,ATAD2,STAT5B,MAP2K1,MEIS1,MAGED2,NR2F2,ITGB3BP,SRCAP,CDH13,RPS6KA5,RBM15B,RCOR1
GO:BP	negative regulation of neurogenesis	GO:0050768	0.0283497	1.54745	143	211	9	21092	CTNNB1,NR1D1,DNAJB11,HES5,HOOK3,SEMA5A,NTRK3,EPHA7,SEMA4A
GO:BP	regulation of macromolecule metabolic process	GO:0060255	0.028799	1.54062	6842	211	98	21092	APP,PTPN11,PRKAG2,PRKN,NBN,SOX2,BTRC,ETV6,LRP8,UBQLN1,CSNK2A1,SMAD3,IDE,CTNNB1,NCOA3,INHA,SF1,SRC,FBXO33,KMT2D,ARRB1,CKS1B,TIAL1,DNAJB2,HNRNPK,HSF2,DDX17,XRCC5,DAB2,AFF4,SALL3,RBM5,SRA1,PTPRO,SMARCA2,SF3B4,NR1D1,PPP1R9B,FMN2,PTRH2,HDAC1,CLTC,ZNF772,L3MBTL3,AFF3,SIN3A,RPS4X,HES5,ZBTB18,TFE3,POLA1,INTS2,CTSC,STX4,DLX6,KMT2A,SPON1,PKIA,EDC4,SCRIB,PNRC2,BABAM2,CLK1,ZNF628,TCF20,USP9X,ZC3H6,WNK3,ZNF22…
GO:BP	negative regulation of cell development	GO:0010721	0.0296581	1.52786	181	211	10	21092	CTNNB1,NR1D1,DNAJB11,HES5,HOOK3,EFNA5,SEMA5A,NTRK3,EPHA7,SEMA4A
GO:BP	negative regulation of multicellular organismal process	GO:0051241	0.0301596	1.52057	1035	211	26	21092	PTPN11,SMAD3,KCNMA1,CTNNB1,INHA,ROBO2,ARRB1,PTPRO,NR1D1,DNAJB11,HDAC1,SIN3A,HES5,TFE3,CTSC,HOOK3,ATP1A1,SEMA5A,NTRK3,EPHA7,BCL2,NR2F2,SEMA4A,PDE4B,RPS6KA5,EMILIN1
GO:BP	regulation of multicellular organismal process	GO:0051239	0.0328291	1.48374	2753	211	50	21092	APP,PTPN11,LRP8,SMAD3,KCNMA1,GRM1,CTNNB1,PTCH2,NCOA3,INHA,SRC,ROBO2,ARRB1,HNRNPK,XRCC5,LRRN3,DAB2,PTPRO,SMARCA2,NR1D1,DNAJB11,POGLUT1,HDAC1,SIN3A,BTBD7,HES5,TFE3,POLA1,RIMS2,CTSC,SCRIB,HOOK3,NLGN1,ATP1A1,EFNA5,SEMA5A,PLXNA4,NTRK3,EPHA7,STAT5B,MAP2K1,BCL2,MEIS1,NR2F2,SEMA4A,PDE4B,PARD3,RPS6KA5,EMILIN1,RCOR1
GO:BP	transcription by RNA polymerase II	GO:0006366	0.0329444	1.48222	2676	211	49	21092	APP,PRKN,SOX2,ETV6,SMAD3,CTNNB1,NCOA3,POLR2A,KMT2D,ARRB1,TIAL1,HNRNPK,HSF2,DDX17,DAB2,SALL3,SRA1,SMARCA2,NR1D1,HDAC1,ZNF772,SIN3A,HES5,ZBTB18,TFE3,INTS2,DLX6,KMT2A,PKIA,ZNF628,TCF20,USP9X,ZNF225,ZNF461,CPEB3,USP2,ZFP90,ZNF234,ZNF283,CHD1,ATAD2,STAT5B,MEIS1,MAGED2,NR2F2,SRCAP,CDH13,RPS6KA5,RCOR1
GO:BP	positive regulation of protein metabolic process	GO:0051247	0.0329876	1.48165	1504	211	33	21092	APP,PTPN11,PRKAG2,PRKN,NBN,BTRC,LRP8,UBQLN1,CSNK2A1,SMAD3,IDE,CTNNB1,INHA,SRC,FBXO33,ARRB1,CKS1B,DNAJB2,XRCC5,DAB2,RPS4X,HES5,CTSC,KMT2A,SPON1,WNK3,EFNA5,CPEB3,NTRK3,EPHA7,MAP2K1,BCL2,RPS6KA5
GO:BP	proteolysis involved in protein catabolic process	GO:0051603	0.0342031	1.46593	796	211	22	21092	PRKN,BTRC,UBQLN1,CSNK2A1,IDE,CTNNB1,FBXO33,ARRB1,DNAJB2,ERLEC1,DAB2,KLHL3,NR1D1,STT3B,RSPRY1,WDR26,CTSC,UBE2W,USP9X,XPO1,USP2,ZNRF3
GO:BP	response to organic cyclic compound	GO:0014070	0.034598	1.46095	918	211	24	21092	APP,PRKN,BTRC,LRP8,CTNNB1,NCOA3,SRC,POLR2A,KMT2D,DDX17,DAB2,NR1D1,PPP1R9B,HDAC1,SIN3A,STXBP1,ATP1A1,EFNA5,NTRK3,STAT5B,ABCD3,BCL2,NR2F2,PDE4B
GO:BP	regulation of DNA-templated transcription	GO:0006355	0.0349039	1.45713	3474	211	59	21092	APP,PRKN,SOX2,BTRC,ETV6,LRP8,SMAD3,CTNNB1,NCOA3,SF1,SRC,KMT2D,ARRB1,CKS1B,TIAL1,HNRNPK,HSF2,DDX17,XRCC5,DAB2,SALL3,SRA1,SMARCA2,NR1D1,HDAC1,ZNF772,L3MBTL3,AFF3,SIN3A,HES5,ZBTB18,TFE3,INTS2,DLX6,KMT2A,PKIA,ZNF628,TCF20,USP9X,ZC3H6,ZNF225,ZNF461,CPEB3,USP2,ZFP90,ZNF234,ZNF283,CHD1,ATAD2,STAT5B,MAP2K1,MEIS1,MAGED2,NR2F2,ITGB3BP,SRCAP,CDH13,RPS6KA5,RCOR1
GO:BP	regulation of nucleic acid-templated transcription	GO:1903506	0.0352116	1.45331	3475	211	59	21092	APP,PRKN,SOX2,BTRC,ETV6,LRP8,SMAD3,CTNNB1,NCOA3,SF1,SRC,KMT2D,ARRB1,CKS1B,TIAL1,HNRNPK,HSF2,DDX17,XRCC5,DAB2,SALL3,SRA1,SMARCA2,NR1D1,HDAC1,ZNF772,L3MBTL3,AFF3,SIN3A,HES5,ZBTB18,TFE3,INTS2,DLX6,KMT2A,PKIA,ZNF628,TCF20,USP9X,ZC3H6,ZNF225,ZNF461,CPEB3,USP2,ZFP90,ZNF234,ZNF283,CHD1,ATAD2,STAT5B,MAP2K1,MEIS1,MAGED2,NR2F2,ITGB3BP,SRCAP,CDH13,RPS6KA5,RCOR1
GO:BP	phosphorylation	GO:0016310	0.0356282	1.44821	1862	211	38	21092	APP,PTPN11,PRKAG2,PRKN,NBN,LRP8,CSNK2A1,PAPSS2,INHA,NME1,SRC,ARRB1,CKS1B,XRCC5,DAB2,PTPRO,KLHL3,PPP1R9B,NADK2,PPIP5K2,HES5,PKIA,AAK1,CLK1,WNK3,LMTK3,EFNA5,NTRK3,EPHA7,MAP2K1,BCL2,TTBK2,NR2F2,PARD3,RSRC1,RPS6KA5,EMILIN1,NRBF2
GO:BP	regulation of cell cycle	GO:0051726	0.0367196	1.4351	1111	211	27	21092	APP,PTPN11,PRCC,DCTN1,NBN,SOX2,BTRC,CSNK2A1,CTNNB1,INHA,SRC,CKS1B,SRA1,SMARCA2,PPP1R9B,CLTC,SIN3A,PKIA,SCRIB,LSM11,BABAM2,XPO1,SLF2,USP2,STAT5B,BCL2,NR2F2
GO:BP	positive regulation of transcription by RNA polymerase II	GO:0045944	0.0374541	1.4265	1243	211	29	21092	APP,PRKN,SOX2,ETV6,SMAD3,CTNNB1,NCOA3,KMT2D,ARRB1,HNRNPK,HSF2,DDX17,DAB2,SMARCA2,NR1D1,HDAC1,SIN3A,HES5,ZBTB18,TFE3,KMT2A,TCF20,ZNF225,ATAD2,STAT5B,MEIS1,NR2F2,CDH13,RPS6KA5
GO:BP	regulation of RNA biosynthetic process	GO:2001141	0.0380968	1.41911	3484	211	59	21092	APP,PRKN,SOX2,BTRC,ETV6,LRP8,SMAD3,CTNNB1,NCOA3,SF1,SRC,KMT2D,ARRB1,CKS1B,TIAL1,HNRNPK,HSF2,DDX17,XRCC5,DAB2,SALL3,SRA1,SMARCA2,NR1D1,HDAC1,ZNF772,L3MBTL3,AFF3,SIN3A,HES5,ZBTB18,TFE3,INTS2,DLX6,KMT2A,PKIA,ZNF628,TCF20,USP9X,ZC3H6,ZNF225,ZNF461,CPEB3,USP2,ZFP90,ZNF234,ZNF283,CHD1,ATAD2,STAT5B,MAP2K1,MEIS1,MAGED2,NR2F2,ITGB3BP,SRCAP,CDH13,RPS6KA5,RCOR1
GO:BP	positive regulation of cellular component organization	GO:0051130	0.038629	1.41309	1050	211	26	21092	CNTNAP2,APP,PRKN,DCTN1,NBN,LRP8,SMAD3,CTNNB1,SRC,ROBO2,ARRB1,HNRNPK,XRCC5,LRRN3,DAB2,COBL,SIN3A,NLGN1,SLF2,EFNA5,SEMA5A,PLXNA4,NTRK3,MAP2K1,SEMA4A,EMILIN1
GO:BP	regulation of cell differentiation	GO:0045595	0.039571	1.40262	1587	211	34	21092	APP,PTPN11,SOX2,LRP8,SMAD3,CTNNB1,PTCH2,NCOA3,INHA,ROBO2,DDX17,XRCC5,DAB2,SRA1,SMARCA2,NR1D1,DNAJB11,HDAC1,SIN3A,HES5,TFE3,HOOK3,NLGN1,EFNA5,SEMA5A,PLXNA4,NTRK3,EPHA7,STAT5B,MAP2K1,BCL2,MEIS1,SEMA4A,RCOR1
GO:BP	regulation of binding	GO:0051098	0.0463076	1.33435	370	211	14	21092	APP,PRKN,SMAD3,IDE,CTNNB1,NME1,SRC,DNAJB2,DAB2,SIN3A,SPON1,USP9X,ZFP90,TTBK2

## Sheet: HvC_CBL
source	term_name	term_id	adjusted_p_value	negative_log10_of_adjusted_p_value	term_size	query_size	intersection_size	effective_domain_size	intersections
GO:BP	anatomical structure development	GO:0048856	1.65e-17	16.7837	5836	384	192	21092	FLT3,APP,PTPN11,EXT2,CYP46A1,FBXW4,ANKH,PRKN,MAP2K1,TBX3,GLI3,SYN1,DCTN1,PHF6,SOX2,PPT1,BCR,FER,LRP8,TGFB3,SMAD3,PPP2R1B,TSG101,PAPSS2,TOP1,ITGA7,IL1RAPL2,CTNNB1,PTCH2,LEF1,MEX3C,KIAA1109,OGT,POU6F2,ITPR1,RREB1,ADAM9,MCF2,TTLL5,INHA,NEBL,SUFU,SF1,SLC4A10,RDX,HDAC9,JAK1,ROBO2,KMT2D,FAP,TST,ZNF513,PRKCB,RARB,FGF2,CCNT2,CUX1,DDX17,ADAM15,BICC1,ASIC2,USP2,FZD8,PRKG1,DAB2,AFF4,NACA,ACIN1,CACNA1G,RAB18…
GO:BP	developmental process	GO:0032502	5.63e-17	16.2497	6424	384	203	21092	FLT3,APP,PTPN11,EXT2,CYP46A1,FBXW4,ANKH,PRKN,MAP2K1,TBX3,GLI3,SYN1,DCTN1,PHF6,SOX2,PPT1,BCR,FER,LRP8,TGFB3,SMAD3,PPP2R1B,TSG101,PAPSS2,TOP1,ITGA7,IL1RAPL2,DDX3X,CTNNB1,PTCH2,LEF1,MEX3C,KIAA1109,OGT,POU6F2,ITPR1,RREB1,ADAM9,MCF2,TTLL5,INHA,NEBL,SUFU,SF1,SLC4A10,RDX,HDAC9,JAK1,ROBO2,KMT2D,FAP,TST,ZNF513,PRKCB,RARB,FGF2,CCNT2,CUX1,HSF2,DDX17,ADAM15,BICC1,ASIC2,USP2,FZD8,PRKG1,DAB2,AFF4,NACA,ACIN1,CA…
GO:BP	regulation of cellular process	GO:0050794	1.03e-16	15.9887	11130	384	289	21092	FLT3,APP,PTPN11,PRKAG2,EXT2,CYP46A1,FBXW4,PRKN,MAP2K1,TBX3,GLI3,SYN1,DCTN1,PHF6,NDUFAF2,SOX2,PPT1,BCR,FER,LRP8,UBQLN1,TGFB3,SCN1A,MAP3K7,CSNK2A1,SMAD3,PPP2R1B,TSG101,ITGA7,ATP6V1G2,RBM10,RAB33A,IL1RAPL2,TAF9B,DDX3X,GRM1,CTNNB1,PTCH2,LEF1,MEX3C,KIAA1109,IRS1,OGT,POU6F2,ITPR1,RREB1,ADAM9,MCF2,GPR34,INHA,SUFU,SF1,SLC4A10,ATG16L1,RDX,HDAC9,JAK1,ROBO2,MLLT10,KMT2D,ARHGEF12,FAP,ARRB1,ZNF513,PRKCB,RARB,…
GO:BP	multicellular organism development	GO:0007275	8.04e-16	15.0948	4823	384	166	21092	FLT3,APP,PTPN11,EXT2,CYP46A1,FBXW4,ANKH,PRKN,MAP2K1,TBX3,GLI3,SYN1,DCTN1,PHF6,SOX2,PPT1,BCR,FER,LRP8,TGFB3,SMAD3,PAPSS2,TOP1,ITGA7,IL1RAPL2,CTNNB1,PTCH2,LEF1,MEX3C,KIAA1109,OGT,POU6F2,ITPR1,MCF2,TTLL5,INHA,NEBL,SUFU,SF1,SLC4A10,HDAC9,JAK1,ROBO2,FAP,ZNF513,PRKCB,RARB,FGF2,CUX1,ADAM15,BICC1,ASIC2,FZD8,PRKG1,DAB2,NACA,ACIN1,CACNA1G,RAB18,CHRM3,SMARCA2,KLHL3,NR1D1,POGLUT1,PPP1R9B,COL12A1,TUBB2A,FAT1,…
GO:BP	regulation of biological process	GO:0050789	4.74e-15	14.3239	12361	384	305	21092	FLT3,APP,PTPN11,PRKAG2,EXT2,CYP46A1,FBXW4,ANKH,PRKN,MAP2K1,TBX3,GLI3,SYN1,DCTN1,PHF6,NDUFAF2,SOX2,PPT1,BCR,FER,LRP8,UBQLN1,TGFB3,SCN1A,MAP3K7,CSNK2A1,SMAD3,PPP2R1B,TSG101,TOP1,ITGA7,ATP6V1G2,RBM10,RAB33A,IL1RAPL2,TAF9B,DDX3X,GRM1,CTNNB1,PTCH2,LEF1,MEX3C,KIAA1109,IRS1,OGT,POU6F2,ITPR1,RREB1,ADAM9,MCF2,GPR34,INHA,SUFU,SF1,SLC4A10,ATG16L1,RDX,HDAC9,JAK1,ROBO2,MLLT10,KMT2D,ARHGEF12,FAP,ARRB1,ZNF513,P…
GO:BP	system development	GO:0048731	2.97e-14	13.5269	4369	384	152	21092	FLT3,APP,PTPN11,EXT2,CYP46A1,FBXW4,ANKH,PRKN,MAP2K1,TBX3,GLI3,SYN1,DCTN1,SOX2,PPT1,BCR,FER,LRP8,TGFB3,SMAD3,PAPSS2,IL1RAPL2,CTNNB1,LEF1,MEX3C,OGT,POU6F2,MCF2,TTLL5,INHA,NEBL,SUFU,SF1,SLC4A10,HDAC9,JAK1,ROBO2,FAP,ZNF513,PRKCB,RARB,FGF2,CUX1,ADAM15,BICC1,ASIC2,FZD8,PRKG1,DAB2,NACA,ACIN1,CACNA1G,RAB18,CHRM3,SMARCA2,KLHL3,NR1D1,POGLUT1,PPP1R9B,TUBB2A,FAT1,HDAC1,PREX2,FZD5,ULK4,SEZ6,DPCD,SDK1,COBL,LGR…
GO:BP	positive regulation of cellular process	GO:0048522	7.03e-14	13.1527	5641	384	179	21092	FLT3,APP,PTPN11,PRKAG2,CYP46A1,FBXW4,PRKN,MAP2K1,TBX3,GLI3,DCTN1,SOX2,PPT1,FER,LRP8,UBQLN1,TGFB3,MAP3K7,CSNK2A1,SMAD3,PPP2R1B,TSG101,RBM10,TAF9B,DDX3X,GRM1,CTNNB1,PTCH2,LEF1,IRS1,OGT,RREB1,ADAM9,INHA,ATG16L1,RDX,HDAC9,JAK1,ROBO2,MLLT10,KMT2D,FAP,ARRB1,ZNF513,PRKCB,RARB,CKS1B,FGF2,NRDC,CCNT2,STAU1,CUX1,DNAJB2,HNRNPK,HSF2,DDX17,ASIC2,USP2,CHST2,DAPK1,CKAP5,FZD8,CACNB3,DAB2,NACA,RBM5,ACIN1,CACNG2,BB…
GO:BP	regulation of signaling	GO:0023051	3.74e-13	12.4267	3374	384	126	21092	FLT3,APP,PTPN11,CYP46A1,PRKN,MAP2K1,GLI3,SYN1,NDUFAF2,SOX2,BCR,FER,LRP8,UBQLN1,TGFB3,MAP3K7,CSNK2A1,SMAD3,PPP2R1B,TSG101,TAF9B,DDX3X,GRM1,CTNNB1,PTCH2,LEF1,IRS1,OGT,ITPR1,ADAM9,MCF2,INHA,SUFU,SLC4A10,RDX,ROBO2,KMT2D,ARHGEF12,ARRB1,PRKCB,FGF2,STAU1,HNRNPK,BICC1,USP2,DAPK1,FZD8,DAB2,CACNG2,BBC3,NR1D1,USP20,ARHGEF40,POGLUT1,PPP1R9B,CCND3,HDAC1,PREX2,URI1,FZD5,ULK4,SEZ6,LGR4,GRIN2D,SIN3A,IFT81,GIT1,G…
GO:BP	biological regulation	GO:0065007	3.87e-13	12.4128	13096	384	312	21092	FLT3,APP,PTPN11,PRKAG2,EXT2,CYP46A1,FBXW4,ANKH,PRKN,MAP2K1,TBX3,GLI3,SYN1,DCTN1,PHF6,NDUFAF2,SOX2,PPT1,BCR,FER,LRP8,UBQLN1,TGFB3,SCN1A,MAP3K7,CSNK2A1,SMAD3,PPP2R1B,TSG101,PAPSS2,TOP1,ITGA7,ATP6V1G2,RBM10,RAB33A,IL1RAPL2,TAF9B,DDX3X,GRM1,CTNNB1,PTCH2,LEF1,MEX3C,KIAA1109,IRS1,OGT,POU6F2,ITPR1,RREB1,ADAM9,MCF2,GPR34,INHA,SUFU,SF1,SLC4A10,ATG16L1,RDX,HDAC9,ACACA,JAK1,ROBO2,MLLT10,KMT2D,ARHGEF12,FAP,A…
GO:BP	regulation of cell communication	GO:0010646	7.63e-13	12.1176	3363	384	125	21092	FLT3,APP,PTPN11,CYP46A1,PRKN,MAP2K1,GLI3,SYN1,NDUFAF2,SOX2,BCR,FER,LRP8,UBQLN1,TGFB3,MAP3K7,CSNK2A1,SMAD3,PPP2R1B,TSG101,TAF9B,DDX3X,GRM1,CTNNB1,PTCH2,LEF1,IRS1,OGT,ITPR1,ADAM9,MCF2,INHA,SUFU,SLC4A10,RDX,ROBO2,KMT2D,ARHGEF12,ARRB1,PRKCB,FGF2,STAU1,HNRNPK,BICC1,USP2,DAPK1,FZD8,DAB2,CACNG2,BBC3,NR1D1,USP20,ARHGEF40,POGLUT1,PPP1R9B,CCND3,HDAC1,PREX2,URI1,FZD5,ULK4,SEZ6,LGR4,GRIN2D,SIN3A,IFT81,GIT1,G…
GO:BP	positive regulation of biological process	GO:0048518	2.13e-12	11.6711	6309	384	189	21092	FLT3,APP,PTPN11,PRKAG2,CYP46A1,FBXW4,PRKN,MAP2K1,TBX3,GLI3,DCTN1,SOX2,PPT1,BCR,FER,LRP8,UBQLN1,TGFB3,MAP3K7,CSNK2A1,SMAD3,PPP2R1B,TSG101,RBM10,TAF9B,DDX3X,GRM1,CTNNB1,PTCH2,LEF1,IRS1,OGT,RREB1,ADAM9,INHA,ATG16L1,RDX,HDAC9,JAK1,ROBO2,MLLT10,KMT2D,FAP,ARRB1,ZNF513,PRKCB,RARB,CKS1B,FGF2,NRDC,CCNT2,STAU1,CUX1,DNAJB2,HNRNPK,HSF2,DDX17,ASIC2,USP2,CHST2,DAPK1,CKAP5,FZD8,CACNB3,DAB2,NACA,RBM5,ACIN1,CACNG…
GO:BP	regulation of cellular metabolic process	GO:0031323	2.72e-12	11.5661	5649	384	175	21092	FLT3,APP,PTPN11,PRKAG2,PRKN,MAP2K1,TBX3,GLI3,PHF6,SOX2,BCR,FER,LRP8,UBQLN1,TGFB3,MAP3K7,CSNK2A1,SMAD3,TSG101,ATP6V1G2,RBM10,TAF9B,DDX3X,CTNNB1,LEF1,IRS1,OGT,POU6F2,ITPR1,RREB1,ADAM9,INHA,SUFU,SF1,ATG16L1,HDAC9,MLLT10,KMT2D,ARRB1,ZNF513,PRKCB,RARB,CKS1B,FGF2,NRDC,CCNT2,CUX1,DNAJB2,HNRNPK,HSF2,DDX17,USP2,HNRNPM,DAPK1,FZD8,DAB2,NACA,RBM5,ACIN1,SMARCA2,SF3B4,LARP7,WDR81,NFIX,NR1D1,ELP4,PPP1R9B,CCND3,…
GO:BP	regulation of nitrogen compound metabolic process	GO:0051171	3.22e-12	11.4918	5706	384	176	21092	FLT3,APP,PTPN11,PRKAG2,PRKN,MAP2K1,TBX3,GLI3,PHF6,SOX2,BCR,FER,LRP8,UBQLN1,TGFB3,MAP3K7,CSNK2A1,SMAD3,TSG101,RBM10,TAF9B,DDX3X,CTNNB1,LEF1,OGT,POU6F2,RREB1,ADAM9,INHA,SUFU,SF1,RDX,HDAC9,MLLT10,KMT2D,ARRB1,ZNF513,PRKCB,RARB,CKS1B,FGF2,NRDC,CCNT2,CUX1,DNAJB2,HNRNPK,HSF2,DDX17,USP2,HNRNPM,DAPK1,FZD8,DAB2,NACA,RBM5,ACIN1,BBC3,SMARCA2,SF3B4,LARP7,NFIX,NR1D1,ELP4,PPP1R9B,CCND3,FMN2,COA3,HDAC1,CLTC,URI1…
GO:BP	nervous system development	GO:0007399	3.45e-12	11.4619	2504	384	102	21092	APP,PTPN11,CYP46A1,PRKN,MAP2K1,TBX3,GLI3,SYN1,DCTN1,SOX2,PPT1,BCR,LRP8,IL1RAPL2,CTNNB1,LEF1,POU6F2,MCF2,SUFU,SLC4A10,HDAC9,ROBO2,RARB,FGF2,CUX1,ASIC2,FZD8,PRKG1,DAB2,RAB18,CHRM3,SMARCA2,NR1D1,PPP1R9B,TUBB2A,HDAC1,PREX2,FZD5,ULK4,SEZ6,DPCD,SDK1,COBL,CELSR2,GRIN2D,SIN3A,PCSK1,GIT1,KIF2A,CHD8,SCYL2,ATP2B2,RIMS2,FZD2,CTSC,MAPK3,STXBP1,DCHS1,POU3F2,PPP2R5B,SYNGAP1,SCRIB,PCDHGA4,ZIC5,LRRTM3,PLPPR1,EOME…
GO:BP	regulation of primary metabolic process	GO:0080090	1.06e-11	10.9753	5869	384	178	21092	FLT3,APP,PTPN11,PRKAG2,PRKN,MAP2K1,TBX3,GLI3,PHF6,SOX2,FER,LRP8,UBQLN1,TGFB3,MAP3K7,CSNK2A1,SMAD3,TSG101,RBM10,TAF9B,DDX3X,CTNNB1,LEF1,IRS1,OGT,POU6F2,RREB1,ADAM9,INHA,SUFU,SF1,RDX,HDAC9,MLLT10,KMT2D,ARRB1,ZNF513,PRKCB,RARB,CKS1B,FGF2,NRDC,CCNT2,CUX1,DNAJB2,HNRNPK,HSF2,DDX17,USP2,HNRNPM,DAPK1,FZD8,DAB2,NACA,RBM5,ACIN1,BBC3,SMARCA2,SF3B4,LARP7,NFIX,NR1D1,ELP4,PPP1R9B,CCND3,FMN2,COA3,HDAC1,ATP1A1,C…
GO:BP	multicellular organismal process	GO:0032501	1.16e-11	10.9374	7463	384	210	21092	FLT3,APP,PTPN11,EXT2,CYP46A1,FBXW4,ANKH,PRKN,MAP2K1,TBX3,GLI3,SYN1,DCTN1,PHF6,SOX2,PPT1,BCR,FER,LRP8,TGFB3,SCN1A,MAP3K7,SMAD3,PAPSS2,TOP1,ITGA7,IL1RAPL2,DDX3X,GRM1,CTNNB1,PTCH2,LEF1,MEX3C,KIAA1109,OGT,POU6F2,ITPR1,RREB1,ADAM9,MCF2,TTLL5,INHA,NEBL,SUFU,SF1,SLC4A10,HDAC9,ACACA,JAK1,ROBO2,KMT2D,FAP,ARRB1,ZNF513,PRKCB,RARB,FGF2,NRDC,CUX1,HNRNPK,HSF2,ADAM15,BICC1,ASIC2,USP2,GLRX3,FZD8,PRKG1,DAB2,AFF4,…
GO:BP	regulation of DNA-templated transcription	GO:0006355	2.38e-11	10.6229	3474	384	124	21092	APP,PRKN,MAP2K1,TBX3,GLI3,PHF6,SOX2,FER,LRP8,TGFB3,MAP3K7,SMAD3,TSG101,RBM10,TAF9B,DDX3X,CTNNB1,LEF1,OGT,POU6F2,RREB1,SUFU,SF1,HDAC9,MLLT10,KMT2D,ARRB1,ZNF513,PRKCB,RARB,CKS1B,FGF2,CCNT2,CUX1,HNRNPK,HSF2,DDX17,USP2,DAB2,NACA,SMARCA2,LARP7,NFIX,NR1D1,ELP4,CCND3,HDAC1,URI1,PPRC1,FZD5,ZNF772,LGR4,CELSR2,SIN3A,L3MBTL3,ZNF507,CHD8,TFE3,INTS2,ZNF569,ZNF383,FZD2,PLCG2,MAPK3,MAPK7,POU3F2,KMT2A,PPP2R5B,BR…
GO:BP	regulation of nucleic acid-templated transcription	GO:1903506	2.43e-11	10.6135	3475	384	124	21092	APP,PRKN,MAP2K1,TBX3,GLI3,PHF6,SOX2,FER,LRP8,TGFB3,MAP3K7,SMAD3,TSG101,RBM10,TAF9B,DDX3X,CTNNB1,LEF1,OGT,POU6F2,RREB1,SUFU,SF1,HDAC9,MLLT10,KMT2D,ARRB1,ZNF513,PRKCB,RARB,CKS1B,FGF2,CCNT2,CUX1,HNRNPK,HSF2,DDX17,USP2,DAB2,NACA,SMARCA2,LARP7,NFIX,NR1D1,ELP4,CCND3,HDAC1,URI1,PPRC1,FZD5,ZNF772,LGR4,CELSR2,SIN3A,L3MBTL3,ZNF507,CHD8,TFE3,INTS2,ZNF569,ZNF383,FZD2,PLCG2,MAPK3,MAPK7,POU3F2,KMT2A,PPP2R5B,BR…
GO:BP	regulation of RNA metabolic process	GO:0051252	2.54e-11	10.5954	3775	384	131	21092	APP,PRKN,MAP2K1,TBX3,GLI3,PHF6,SOX2,FER,LRP8,TGFB3,MAP3K7,SMAD3,TSG101,RBM10,TAF9B,DDX3X,CTNNB1,LEF1,OGT,POU6F2,RREB1,SUFU,SF1,HDAC9,MLLT10,KMT2D,ARRB1,ZNF513,PRKCB,RARB,CKS1B,FGF2,CCNT2,CUX1,HNRNPK,HSF2,DDX17,USP2,HNRNPM,DAB2,NACA,RBM5,ACIN1,SMARCA2,SF3B4,LARP7,NFIX,NR1D1,ELP4,CCND3,HDAC1,URI1,PPRC1,FZD5,ZNF772,LGR4,CELSR2,SIN3A,L3MBTL3,ZNF507,CHD8,TFE3,INTS2,ZNF569,ZNF383,FZD2,PLCG2,MAPK3,MAPK7…
GO:BP	regulation of RNA biosynthetic process	GO:2001141	2.96e-11	10.5289	3484	384	124	21092	APP,PRKN,MAP2K1,TBX3,GLI3,PHF6,SOX2,FER,LRP8,TGFB3,MAP3K7,SMAD3,TSG101,RBM10,TAF9B,DDX3X,CTNNB1,LEF1,OGT,POU6F2,RREB1,SUFU,SF1,HDAC9,MLLT10,KMT2D,ARRB1,ZNF513,PRKCB,RARB,CKS1B,FGF2,CCNT2,CUX1,HNRNPK,HSF2,DDX17,USP2,DAB2,NACA,SMARCA2,LARP7,NFIX,NR1D1,ELP4,CCND3,HDAC1,URI1,PPRC1,FZD5,ZNF772,LGR4,CELSR2,SIN3A,L3MBTL3,ZNF507,CHD8,TFE3,INTS2,ZNF569,ZNF383,FZD2,PLCG2,MAPK3,MAPK7,POU3F2,KMT2A,PPP2R5B,BR…
GO:BP	RNA biosynthetic process	GO:0032774	3.21e-11	10.4934	3615	384	127	21092	APP,PRKN,MAP2K1,TBX3,GLI3,PHF6,SOX2,FER,LRP8,TGFB3,MAP3K7,SMAD3,TSG101,RBM10,TAF9B,DDX3X,CTNNB1,LEF1,OGT,POU6F2,RREB1,SUFU,SF1,HDAC9,POLR2A,MLLT10,KMT2D,ARRB1,ZNF513,PRKCB,RARB,CKS1B,FGF2,CCNT2,CUX1,HNRNPK,HSF2,DDX17,USP2,DAB2,NACA,GTF3C3,SMARCA2,LARP7,NFIX,NR1D1,ELP4,CCND3,HDAC1,URI1,PPRC1,FZD5,ZNF772,LGR4,CELSR2,SIN3A,L3MBTL3,ZNF507,CHD8,TFE3,POLA1,INTS2,ZNF569,ZNF383,FZD2,PLCG2,MAPK3,MAPK7,POU…
GO:BP	cellular developmental process	GO:0048869	4.13e-11	10.3842	4280	384	142	21092	FLT3,APP,PTPN11,EXT2,PRKN,MAP2K1,TBX3,GLI3,SYN1,SOX2,PPT1,BCR,FER,LRP8,TGFB3,SMAD3,TSG101,ITGA7,DDX3X,CTNNB1,PTCH2,LEF1,MEX3C,KIAA1109,POU6F2,RREB1,ADAM9,MCF2,INHA,NEBL,SUFU,SF1,SLC4A10,RDX,HDAC9,JAK1,ROBO2,KMT2D,TST,RARB,FGF2,CCNT2,CUX1,DDX17,ADAM15,FZD8,PRKG1,DAB2,AFF4,NACA,ACIN1,SMARCA2,LARP7,NR1D1,PPP1R9B,ABCA5,FMN2,COL12A1,TUBB2A,FAT1,HDAC1,PREX2,CLTC,FZD5,DNAJC13,ULK4,SEZ6,SDK1,YTHDC2,COBL,…
GO:BP	regulation of signal transduction	GO:0009966	4.92e-11	10.3081	2968	384	111	21092	FLT3,APP,PTPN11,PRKN,MAP2K1,GLI3,SOX2,BCR,FER,UBQLN1,TGFB3,MAP3K7,CSNK2A1,SMAD3,PPP2R1B,TSG101,TAF9B,DDX3X,GRM1,CTNNB1,PTCH2,LEF1,IRS1,OGT,ITPR1,ADAM9,MCF2,INHA,SUFU,RDX,ROBO2,KMT2D,ARHGEF12,ARRB1,PRKCB,FGF2,HNRNPK,BICC1,USP2,DAPK1,FZD8,DAB2,CACNG2,BBC3,NR1D1,USP20,ARHGEF40,POGLUT1,PPP1R9B,CCND3,HDAC1,PREX2,URI1,FZD5,ULK4,SEZ6,LGR4,GRIN2D,SIN3A,IFT81,GIT1,GPR137C,MYO9B,CHD8,PEG10,SCYL2,DLGAP2,RIM…
GO:BP	DNA-templated transcription	GO:0006351	5.17e-11	10.2863	3595	384	126	21092	APP,PRKN,MAP2K1,TBX3,GLI3,PHF6,SOX2,FER,LRP8,TGFB3,MAP3K7,SMAD3,TSG101,RBM10,TAF9B,DDX3X,CTNNB1,LEF1,OGT,POU6F2,RREB1,SUFU,SF1,HDAC9,POLR2A,MLLT10,KMT2D,ARRB1,ZNF513,PRKCB,RARB,CKS1B,FGF2,CCNT2,CUX1,HNRNPK,HSF2,DDX17,USP2,DAB2,NACA,GTF3C3,SMARCA2,LARP7,NFIX,NR1D1,ELP4,CCND3,HDAC1,URI1,PPRC1,FZD5,ZNF772,LGR4,CELSR2,SIN3A,L3MBTL3,ZNF507,CHD8,TFE3,INTS2,ZNF569,ZNF383,FZD2,PLCG2,MAPK3,MAPK7,POU3F2,KM…
GO:BP	nucleic acid-templated transcription	GO:0097659	5.28e-11	10.2771	3596	384	126	21092	APP,PRKN,MAP2K1,TBX3,GLI3,PHF6,SOX2,FER,LRP8,TGFB3,MAP3K7,SMAD3,TSG101,RBM10,TAF9B,DDX3X,CTNNB1,LEF1,OGT,POU6F2,RREB1,SUFU,SF1,HDAC9,POLR2A,MLLT10,KMT2D,ARRB1,ZNF513,PRKCB,RARB,CKS1B,FGF2,CCNT2,CUX1,HNRNPK,HSF2,DDX17,USP2,DAB2,NACA,GTF3C3,SMARCA2,LARP7,NFIX,NR1D1,ELP4,CCND3,HDAC1,URI1,PPRC1,FZD5,ZNF772,LGR4,CELSR2,SIN3A,L3MBTL3,ZNF507,CHD8,TFE3,INTS2,ZNF569,ZNF383,FZD2,PLCG2,MAPK3,MAPK7,POU3F2,KM…
GO:BP	heterocycle biosynthetic process	GO:0018130	5.97e-11	10.2237	4122	384	138	21092	APP,PRKAG2,PRKN,MAP2K1,TBX3,GLI3,PHF6,SOX2,PPT1,FER,LRP8,TGFB3,MAP3K7,SMAD3,TSG101,PAPSS2,RBM10,TAF9B,DDX3X,CTNNB1,LEF1,OGT,POU6F2,RREB1,SUFU,SF1,HDAC9,ACACA,POLR2A,MLLT10,KMT2D,ARRB1,ZNF513,PRKCB,RARB,CKS1B,FGF2,CCNT2,MTHFS,CUX1,HNRNPK,HSF2,DDX17,USP2,DAB2,NACA,GTF3C3,ADK,SMARCA2,NDUFA12,LARP7,NFIX,NR1D1,ELP4,CCND3,HDAC1,URI1,PPRC1,FZD5,ZNF772,LGR4,CELSR2,SIN3A,L3MBTL3,ZNF507,CHD8,TFE3,POLA1,INT…
GO:BP	cell differentiation	GO:0030154	6.13e-11	10.2123	4256	384	141	21092	FLT3,APP,PTPN11,EXT2,PRKN,MAP2K1,TBX3,GLI3,SYN1,SOX2,PPT1,BCR,FER,LRP8,TGFB3,SMAD3,TSG101,ITGA7,DDX3X,CTNNB1,PTCH2,LEF1,MEX3C,KIAA1109,POU6F2,RREB1,ADAM9,MCF2,INHA,NEBL,SUFU,SF1,SLC4A10,RDX,HDAC9,JAK1,ROBO2,KMT2D,TST,RARB,FGF2,CCNT2,CUX1,DDX17,ADAM15,FZD8,PRKG1,DAB2,AFF4,NACA,ACIN1,SMARCA2,LARP7,NR1D1,PPP1R9B,ABCA5,FMN2,COL12A1,TUBB2A,FAT1,HDAC1,PREX2,CLTC,FZD5,DNAJC13,ULK4,SEZ6,SDK1,YTHDC2,COBL,…
GO:BP	regulation of macromolecule biosynthetic process	GO:0010556	6.51e-11	10.1867	3951	384	134	21092	APP,PRKN,MAP2K1,TBX3,GLI3,PHF6,SOX2,FER,LRP8,TGFB3,MAP3K7,SMAD3,TSG101,RBM10,TAF9B,DDX3X,CTNNB1,LEF1,IRS1,OGT,POU6F2,RREB1,SUFU,SF1,HDAC9,MLLT10,KMT2D,ARRB1,ZNF513,PRKCB,RARB,CKS1B,FGF2,CCNT2,CUX1,HNRNPK,HSF2,DDX17,USP2,DAPK1,DAB2,NACA,SMARCA2,LARP7,NFIX,NR1D1,ELP4,CCND3,COA3,HDAC1,CLTC,URI1,PPRC1,LARP1B,FZD5,ZNF772,LGR4,CELSR2,SIN3A,RPS4X,L3MBTL3,ZNF507,CHD8,TFE3,INTS2,ZNF569,ZNF383,FZD2,PLCG2,M…
GO:BP	aromatic compound biosynthetic process	GO:0019438	7.41e-11	10.13	4133	384	138	21092	APP,PRKAG2,PRKN,MAP2K1,TBX3,GLI3,PHF6,SOX2,PPT1,FER,LRP8,TGFB3,MAP3K7,SMAD3,TSG101,PAPSS2,RBM10,TAF9B,DDX3X,CTNNB1,LEF1,OGT,POU6F2,RREB1,SUFU,SF1,HDAC9,ACACA,POLR2A,MLLT10,KMT2D,ARRB1,ZNF513,PRKCB,RARB,CKS1B,FGF2,CCNT2,MTHFS,CUX1,HNRNPK,HSF2,DDX17,USP2,DAB2,NACA,GTF3C3,ADK,SMARCA2,NDUFA12,LARP7,NFIX,NR1D1,ELP4,CCND3,HDAC1,URI1,PPRC1,FZD5,ZNF772,LGR4,CELSR2,SIN3A,L3MBTL3,ZNF507,CHD8,TFE3,POLA1,INT…
GO:BP	positive regulation of nitrogen compound metabolic process	GO:0051173	7.75e-11	10.1107	3152	384	115	21092	FLT3,APP,PTPN11,PRKAG2,PRKN,MAP2K1,TBX3,GLI3,SOX2,LRP8,UBQLN1,TGFB3,MAP3K7,CSNK2A1,SMAD3,TSG101,DDX3X,CTNNB1,LEF1,OGT,RREB1,ADAM9,INHA,RDX,MLLT10,KMT2D,ARRB1,ZNF513,PRKCB,RARB,CKS1B,FGF2,NRDC,CCNT2,DNAJB2,HNRNPK,HSF2,DDX17,DAPK1,FZD8,DAB2,NACA,BBC3,SMARCA2,SF3B4,LARP7,NFIX,NR1D1,CCND3,FMN2,COA3,HDAC1,PPRC1,LARP1B,FZD5,LGR4,SIN3A,RPS4X,ZNF507,CHD8,TFE3,FZD2,CTSC,PLCG2,MAPK3,MAPK7,RFC3,POU3F2,KMT2A…
GO:BP	nucleobase-containing compound biosynthetic process	GO:0034654	8.02e-11	10.096	4049	384	136	21092	APP,PRKAG2,PRKN,MAP2K1,TBX3,GLI3,PHF6,SOX2,PPT1,FER,LRP8,TGFB3,MAP3K7,SMAD3,TSG101,PAPSS2,RBM10,TAF9B,DDX3X,CTNNB1,LEF1,OGT,POU6F2,RREB1,SUFU,SF1,HDAC9,ACACA,POLR2A,MLLT10,KMT2D,ARRB1,ZNF513,PRKCB,RARB,CKS1B,FGF2,CCNT2,CUX1,HNRNPK,HSF2,DDX17,USP2,DAB2,NACA,GTF3C3,ADK,SMARCA2,NDUFA12,LARP7,NFIX,NR1D1,ELP4,CCND3,HDAC1,URI1,PPRC1,FZD5,ZNF772,LGR4,CELSR2,SIN3A,L3MBTL3,ZNF507,CHD8,TFE3,POLA1,INTS2,ZNF…
GO:BP	positive regulation of macromolecule metabolic process	GO:0010604	8.77e-11	10.057	3535	384	124	21092	FLT3,APP,PTPN11,PRKAG2,PRKN,MAP2K1,TBX3,GLI3,SOX2,LRP8,UBQLN1,TGFB3,MAP3K7,CSNK2A1,SMAD3,TSG101,RBM10,DDX3X,CTNNB1,LEF1,IRS1,OGT,RREB1,ADAM9,INHA,RDX,MLLT10,KMT2D,ARRB1,ZNF513,PRKCB,RARB,CKS1B,FGF2,NRDC,CCNT2,DNAJB2,HNRNPK,HSF2,DDX17,DAPK1,FZD8,DAB2,NACA,BBC3,SMARCA2,SF3B4,LARP7,NFIX,NR1D1,CCND3,FMN2,COA3,HDAC1,PPRC1,LARP1B,FZD5,LGR4,SIN3A,RPS4X,STMP1,ZNF507,CHD8,TFE3,FZD2,CTSC,PLCG2,MAPK3,MAPK7,…
GO:BP	organic cyclic compound biosynthetic process	GO:1901362	9.74e-11	10.0115	4280	384	141	21092	APP,PRKAG2,CYP46A1,PRKN,MAP2K1,TBX3,GLI3,PHF6,SOX2,PPT1,FER,LRP8,TGFB3,MAP3K7,SMAD3,TSG101,PAPSS2,RBM10,TAF9B,DDX3X,CTNNB1,LEF1,OGT,POU6F2,RREB1,SUFU,SF1,HDAC9,ACACA,POLR2A,MLLT10,KMT2D,ARRB1,ZNF513,PRKCB,RARB,CKS1B,FGF2,CCNT2,MTHFS,CUX1,HNRNPK,HSF2,DDX17,USP2,DAB2,NACA,GTF3C3,ADK,SMARCA2,NDUFA12,LARP7,NFIX,NR1D1,ELP4,CCND3,HDAC1,ATP1A1,URI1,PPRC1,FZD5,ZNF772,LGR4,CELSR2,SIN3A,L3MBTL3,ZNF507,CHD8…
GO:BP	transcription by RNA polymerase II	GO:0006366	9.96e-11	10.0016	2676	384	103	21092	APP,PRKN,TBX3,GLI3,PHF6,SOX2,TGFB3,SMAD3,TSG101,RBM10,TAF9B,DDX3X,CTNNB1,LEF1,OGT,POU6F2,RREB1,SUFU,HDAC9,POLR2A,MLLT10,KMT2D,ARRB1,ZNF513,PRKCB,RARB,FGF2,CCNT2,CUX1,HNRNPK,HSF2,DDX17,USP2,DAB2,NACA,SMARCA2,LARP7,NFIX,NR1D1,ELP4,CCND3,HDAC1,URI1,PPRC1,FZD5,ZNF772,SIN3A,ZNF507,CHD8,TFE3,INTS2,ZNF569,ZNF383,MAPK3,MAPK7,POU3F2,KMT2A,PPP2R5B,BRD3,SCAF8,ZNF10,KLF13,PHIP,ZNF394,ZIC5,ZNF564,RNF168,E2F6,…
GO:BP	central nervous system development	GO:0007417	1.46e-10	9.8368	1065	384	58	21092	APP,PTPN11,PRKN,MAP2K1,TBX3,GLI3,DCTN1,SOX2,PPT1,BCR,LRP8,IL1RAPL2,CTNNB1,LEF1,POU6F2,SUFU,SLC4A10,ROBO2,RARB,FGF2,ASIC2,PRKG1,RAB18,NR1D1,PPP1R9B,HDAC1,SEZ6,DPCD,CELSR2,GRIN2D,SIN3A,PCSK1,GIT1,CHD8,SCYL2,ATP2B2,MAPK3,POU3F2,SCRIB,ZIC5,EOMES,CDK6,PCDH19,ADGRL3,SEMA5A,SEMA3A,PLXNA4,TTBK2,NTRK3,SPTBN4,PSEN1,NDUFS4,TOX,DLC1,GRIN2B,MTOR,CSK,CHD5
GO:BP	regulation of transcription by RNA polymerase II	GO:0006357	1.5e-10	9.82319	2574	384	100	21092	APP,PRKN,TBX3,GLI3,PHF6,SOX2,TGFB3,SMAD3,TSG101,RBM10,TAF9B,DDX3X,CTNNB1,LEF1,OGT,POU6F2,RREB1,SUFU,HDAC9,MLLT10,KMT2D,ARRB1,ZNF513,PRKCB,RARB,FGF2,CCNT2,CUX1,HNRNPK,HSF2,DDX17,USP2,DAB2,NACA,SMARCA2,LARP7,NFIX,NR1D1,ELP4,CCND3,HDAC1,URI1,PPRC1,FZD5,ZNF772,SIN3A,ZNF507,CHD8,TFE3,ZNF569,ZNF383,MAPK3,MAPK7,POU3F2,KMT2A,PPP2R5B,BRD3,SCAF8,ZNF10,KLF13,PHIP,ZNF394,ZIC5,ZNF564,E2F6,TCF20,EOMES,USP9X,CD…
GO:BP	macromolecule biosynthetic process	GO:0009059	1.53e-10	9.81619	4801	384	152	21092	APP,EXT2,PRKN,MAP2K1,TBX3,GLI3,PHF6,SOX2,FER,LRP8,TGFB3,GALNT2,MAP3K7,SMAD3,TSG101,RBM10,TAF9B,DDX3X,CTNNB1,LEF1,IRS1,OGT,POU6F2,RREB1,TCEAL4,INHA,CDKAL1,SUFU,SF1,ATG16L1,HDAC9,POLR2A,MLLT10,KMT2D,ARRB1,ZNF513,PRKCB,RARB,CKS1B,FGF2,CCNT2,CUX1,HNRNPK,HSF2,DDX17,USP2,CHST2,DAPK1,DAB2,NACA,GTF3C3,SMARCA2,LARP7,NFIX,NR1D1,ELP4,POGLUT1,STT3B,CCND3,STT3A,COA3,HDAC1,CLTC,URI1,PPRC1,LARP1B,FZD5,ZNF772,LG…
GO:BP	regulation of localization	GO:0032879	2.3e-10	9.63883	2089	384	87	21092	APP,PTPN11,PRKAG2,PRKN,MAP2K1,GLI3,SYN1,NDUFAF2,PPT1,BCR,FER,UBQLN1,TGFB3,SCN1A,SMAD3,TSG101,CTNNB1,IRS1,ITPR1,ADAM9,INHA,SUFU,RDX,ARRB1,PRKCB,FGF2,DNAJB2,HNRNPK,ASIC2,DAPK1,CACNB3,DAB2,NACA,CACNG2,BBC3,CACNA1G,CHRM3,LARP7,NR1D1,KCNH5,PPP1R9B,ABCA5,KCNH7,ATP1A1,CLTC,STX8,KCNQ5,FZD5,DNAJC13,CELSR2,GRIN2D,SIN3A,PCSK1,GIT1,DIAPH1,SCYL2,RIMS2,PLCG2,MAPK3,STXBP1,KMT2A,CLIC4,AAK1,SCRIB,WNK3,KCNK10,CACN…
GO:BP	regulation of nucleobase-containing compound metabolic process	GO:0019219	4.01e-10	9.39668	4088	384	135	21092	APP,PRKAG2,PRKN,MAP2K1,TBX3,GLI3,PHF6,SOX2,FER,LRP8,TGFB3,MAP3K7,SMAD3,TSG101,RBM10,TAF9B,DDX3X,CTNNB1,LEF1,OGT,POU6F2,RREB1,SUFU,SF1,HDAC9,MLLT10,KMT2D,ARRB1,ZNF513,PRKCB,RARB,CKS1B,FGF2,CCNT2,CUX1,HNRNPK,HSF2,DDX17,USP2,HNRNPM,DAB2,NACA,RBM5,ACIN1,SMARCA2,SF3B4,LARP7,NFIX,NR1D1,ELP4,CCND3,FMN2,HDAC1,URI1,PPRC1,FZD5,ZNF772,LGR4,CELSR2,SIN3A,L3MBTL3,GIT1,ZNF507,CHD8,TFE3,INTS2,ZNF569,ZNF383,FZD2,…
GO:BP	neurogenesis	GO:0022008	5.74e-10	9.24108	1680	384	75	21092	APP,PTPN11,PRKN,MAP2K1,GLI3,SYN1,SOX2,PPT1,LRP8,CTNNB1,LEF1,MCF2,SUFU,SLC4A10,HDAC9,ROBO2,RARB,FGF2,CUX1,FZD8,PRKG1,DAB2,NR1D1,PPP1R9B,TUBB2A,HDAC1,PREX2,FZD5,ULK4,SEZ6,SDK1,COBL,CELSR2,SIN3A,PCSK1,GIT1,SCYL2,ATP2B2,RIMS2,FZD2,MAPK3,STXBP1,DCHS1,POU3F2,PPP2R5B,SYNGAP1,SCRIB,EOMES,USP9X,CDK6,PLEC,ADGRL3,REST,EFNA5,SEMA5A,SEMA3A,PLXNA4,CPEB3,NTRK3,SPTBN4,PSEN1,BMPR2,TOX,TRIOBP,TENM1,PAK6,MTOR,CSPG4…
GO:BP	head development	GO:0060322	7.76e-10	9.11015	828	384	49	21092	APP,PTPN11,MAP2K1,TBX3,GLI3,SOX2,PPT1,BCR,LRP8,TGFB3,CTNNB1,LEF1,SLC4A10,ROBO2,RARB,FGF2,PRKG1,RAB18,PPP1R9B,HDAC1,SEZ6,DPCD,CELSR2,GRIN2D,SIN3A,PCSK1,GIT1,CHD8,SCYL2,ATP2B2,MAPK3,POU3F2,SCRIB,COL1A1,EOMES,CDK6,PCDH19,ADGRL3,SEMA5A,SEMA3A,PLXNA4,TTBK2,PSEN1,NDUFS4,TOX,DLC1,GRIN2B,CSK,CHD5
GO:BP	positive regulation of cellular metabolic process	GO:0031325	8.21e-10	9.08578	3094	384	111	21092	FLT3,APP,PTPN11,PRKAG2,PRKN,MAP2K1,TBX3,GLI3,SOX2,LRP8,UBQLN1,TGFB3,MAP3K7,SMAD3,TSG101,DDX3X,CTNNB1,LEF1,IRS1,OGT,RREB1,ADAM9,INHA,ATG16L1,MLLT10,KMT2D,ARRB1,ZNF513,PRKCB,RARB,CKS1B,FGF2,NRDC,CCNT2,DNAJB2,HNRNPK,HSF2,DDX17,DAPK1,FZD8,DAB2,NACA,SMARCA2,SF3B4,LARP7,NFIX,NR1D1,CCND3,FMN2,COA3,HDAC1,PPRC1,LARP1B,FZD5,LGR4,SIN3A,RPS4X,ZNF507,CHD8,TFE3,FZD2,PLCG2,MAPK3,MAPK7,RFC3,POU3F2,KMT2A,PPP2R5B,…
GO:BP	negative regulation of cellular process	GO:0048523	1.56e-09	8.80606	4749	384	148	21092	APP,PTPN11,PRKAG2,PRKN,MAP2K1,TBX3,GLI3,PHF6,NDUFAF2,SOX2,PPT1,BCR,FER,UBQLN1,TGFB3,CSNK2A1,SMAD3,TSG101,RBM10,TAF9B,DDX3X,CTNNB1,PTCH2,LEF1,IRS1,OGT,ITPR1,RREB1,MCF2,INHA,SUFU,SF1,RDX,HDAC9,ROBO2,FAP,ARRB1,PRKCB,RARB,FGF2,CUX1,DNAJB2,HNRNPK,ADAM15,BICC1,ASIC2,USP2,DAPK1,PRKG1,DAB2,NACA,RBM5,ACIN1,BBC3,SMARCA2,LARP7,NFIX,NR1D1,PPP1R9B,ABCA5,CCND3,FMN2,HDAC1,ATP1A1,CLTC,URI1,FZD5,YTHDC2,LGR4,SIN3A…
GO:BP	animal organ development	GO:0048513	1.57e-09	8.80447	3591	384	122	21092	FLT3,APP,PTPN11,EXT2,FBXW4,ANKH,MAP2K1,TBX3,GLI3,DCTN1,SOX2,PPT1,BCR,FER,LRP8,TGFB3,SMAD3,TSG101,PAPSS2,ITGA7,CTNNB1,PTCH2,LEF1,MEX3C,OGT,RREB1,ADAM9,TTLL5,INHA,NEBL,SUFU,SF1,SLC4A10,HDAC9,JAK1,ROBO2,ZNF513,RARB,FGF2,CCNT2,DDX17,ADAM15,BICC1,USP2,FZD8,PRKG1,DAB2,NACA,ACIN1,CACNA1G,RAB18,SMARCA2,KLHL3,POGLUT1,PPP1R9B,FAT1,HDAC1,RASAL2,FZD5,SEZ6,DPCD,SDK1,COBL,LGR4,CELSR2,GRIN2D,SIN3A,PCSK1,BTBD7,L…
GO:BP	regulation of biosynthetic process	GO:0009889	2.03e-09	8.6915	4175	384	135	21092	APP,PRKN,MAP2K1,TBX3,GLI3,PHF6,SOX2,FER,LRP8,TGFB3,MAP3K7,SMAD3,TSG101,RBM10,TAF9B,DDX3X,CTNNB1,LEF1,IRS1,OGT,POU6F2,RREB1,SUFU,SF1,HDAC9,MLLT10,KMT2D,ARRB1,ZNF513,PRKCB,RARB,CKS1B,FGF2,CCNT2,CUX1,HNRNPK,HSF2,DDX17,USP2,DAPK1,DAB2,NACA,SMARCA2,LARP7,NFIX,NR1D1,ELP4,CCND3,COA3,HDAC1,ATP1A1,CLTC,URI1,PPRC1,LARP1B,FZD5,ZNF772,LGR4,CELSR2,SIN3A,RPS4X,L3MBTL3,ZNF507,CHD8,TFE3,INTS2,ZNF569,ZNF383,FZD2,…
GO:BP	cell development	GO:0048468	2.5e-09	8.6015	2142	384	86	21092	APP,PTPN11,PRKN,MAP2K1,TBX3,GLI3,SYN1,PPT1,FER,LRP8,SMAD3,CTNNB1,LEF1,MEX3C,RREB1,MCF2,NEBL,SLC4A10,RDX,HDAC9,ROBO2,KMT2D,RARB,FGF2,CUX1,PRKG1,DAB2,AFF4,NACA,SMARCA2,NR1D1,PPP1R9B,FMN2,FAT1,HDAC1,PREX2,FZD5,ULK4,SEZ6,SDK1,YTHDC2,COBL,CELSR2,SIN3A,IFT81,L3MBTL3,GIT1,SCYL2,RIMS2,FZD2,MAPK3,STXBP1,POU3F2,PPP2R5B,SYNGAP1,CLIC4,SCRIB,USP9X,CDK6,PLEC,REST,EFNA5,SEMA5A,SEMA3A,C1GALT1,PLXNA4,CPEB3,NTRK3,…
GO:BP	regulation of cellular biosynthetic process	GO:0031326	3.4e-09	8.46822	4114	384	133	21092	APP,PRKN,MAP2K1,TBX3,GLI3,PHF6,SOX2,FER,LRP8,TGFB3,MAP3K7,SMAD3,TSG101,RBM10,TAF9B,DDX3X,CTNNB1,LEF1,IRS1,OGT,POU6F2,RREB1,SUFU,SF1,HDAC9,MLLT10,KMT2D,ARRB1,ZNF513,PRKCB,RARB,CKS1B,FGF2,CCNT2,CUX1,HNRNPK,HSF2,DDX17,USP2,DAPK1,DAB2,NACA,SMARCA2,LARP7,NFIX,NR1D1,ELP4,CCND3,COA3,HDAC1,ATP1A1,URI1,PPRC1,LARP1B,FZD5,ZNF772,LGR4,CELSR2,SIN3A,RPS4X,L3MBTL3,ZNF507,CHD8,TFE3,INTS2,ZNF569,ZNF383,FZD2,PLCG2…
GO:BP	regulation of cellular component organization	GO:0051128	3.99e-09	8.39933	2355	384	91	21092	APP,PTPN11,PRKN,MAP2K1,DCTN1,PPT1,FER,LRP8,TGFB3,CSNK2A1,SMAD3,TSG101,IL1RAPL2,TAF9B,DDX3X,CTNNB1,PTCH2,KIAA1109,RREB1,ADAM9,MCF2,RDX,ROBO2,FAP,ARRB1,CUX1,DNAJB2,HNRNPK,ADAM15,ASIC2,CKAP5,DAB2,BBC3,SMARCA2,PPP1R9B,CLTC,URI1,FZD5,ULK4,SEZ6,COBL,KCTD17,SIN3A,L3MBTL3,GIT1,STMP1,DIAPH1,SCYL2,RIMS2,PLCG2,MAPK3,STXBP1,POU3F2,PPP2R5B,SYNGAP1,CLIC4,SCAF8,AAK1,ALMS1,SCRIB,PHIP,TMEM135,LSM11,LRRTM3,EFNA5,S…
GO:BP	organic substance biosynthetic process	GO:1901576	4.68e-09	8.33014	5854	384	170	21092	APP,PRKAG2,EXT2,CYP46A1,PRKN,MAP2K1,TBX3,GLI3,PHF6,SOX2,PPT1,FER,LRP8,TGFB3,GALNT2,MAP3K7,SMAD3,TSG101,PAPSS2,RBM10,TAF9B,DDX3X,CTNNB1,LEF1,IRS1,OGT,POU6F2,RREB1,TCEAL4,PGM1,INHA,CDKAL1,SUFU,SF1,ATG16L1,HDAC9,ACACA,POLR2A,MLLT10,KMT2D,ARRB1,ZNF513,PRKCB,RARB,CKS1B,FGF2,CCNT2,MTHFS,CUX1,HNRNPK,HSF2,DDX17,USP2,CHST2,DAPK1,DAB2,NACA,GTF3C3,ADK,SMARCA2,NDUFA12,LARP7,NFIX,NR1D1,ELP4,POGLUT1,STT3B,FAR1…
GO:BP	brain development	GO:0007420	4.95e-09	8.30531	780	384	46	21092	APP,PTPN11,MAP2K1,TBX3,GLI3,SOX2,PPT1,BCR,LRP8,CTNNB1,LEF1,SLC4A10,ROBO2,RARB,FGF2,PRKG1,RAB18,PPP1R9B,HDAC1,SEZ6,DPCD,CELSR2,GRIN2D,SIN3A,PCSK1,GIT1,CHD8,SCYL2,ATP2B2,POU3F2,SCRIB,EOMES,CDK6,PCDH19,ADGRL3,SEMA5A,SEMA3A,PLXNA4,TTBK2,PSEN1,NDUFS4,TOX,DLC1,GRIN2B,CSK,CHD5
GO:BP	positive regulation of metabolic process	GO:0009893	7.76e-09	8.11013	3849	384	126	21092	FLT3,APP,PTPN11,PRKAG2,PRKN,MAP2K1,TBX3,GLI3,SOX2,LRP8,UBQLN1,TGFB3,MAP3K7,CSNK2A1,SMAD3,TSG101,RBM10,DDX3X,CTNNB1,LEF1,IRS1,OGT,RREB1,ADAM9,INHA,ATG16L1,RDX,MLLT10,KMT2D,ARRB1,ZNF513,PRKCB,RARB,CKS1B,FGF2,NRDC,CCNT2,DNAJB2,HNRNPK,HSF2,DDX17,DAPK1,FZD8,DAB2,NACA,BBC3,SMARCA2,SF3B4,LARP7,NFIX,NR1D1,CCND3,FMN2,COA3,HDAC1,PPRC1,LARP1B,FZD5,LGR4,SIN3A,RPS4X,STMP1,ZNF507,CHD8,TFE3,FZD2,CTSC,PLCG2,MAPK…
GO:BP	biosynthetic process	GO:0009058	8.46e-09	8.0727	5941	384	171	21092	APP,PRKAG2,EXT2,CYP46A1,PRKN,MAP2K1,TBX3,GLI3,PHF6,SOX2,PPT1,FER,LRP8,TGFB3,GALNT2,MAP3K7,SMAD3,TSG101,PAPSS2,RBM10,TAF9B,ALDH1L2,DDX3X,CTNNB1,LEF1,IRS1,OGT,POU6F2,RREB1,TCEAL4,PGM1,INHA,CDKAL1,SUFU,SF1,ATG16L1,HDAC9,ACACA,POLR2A,MLLT10,KMT2D,ARRB1,ZNF513,PRKCB,RARB,CKS1B,FGF2,CCNT2,MTHFS,CUX1,HNRNPK,HSF2,DDX17,USP2,CHST2,DAPK1,DAB2,NACA,GTF3C3,ADK,SMARCA2,NDUFA12,LARP7,NFIX,NR1D1,ELP4,POGLUT1,ST…
GO:BP	cellular nitrogen compound biosynthetic process	GO:0044271	9.11e-09	8.04069	4853	384	148	21092	APP,PRKAG2,PRKN,MAP2K1,TBX3,GLI3,PHF6,SOX2,PPT1,FER,LRP8,TGFB3,MAP3K7,SMAD3,TSG101,PAPSS2,RBM10,TAF9B,DDX3X,CTNNB1,LEF1,OGT,POU6F2,RREB1,TCEAL4,CDKAL1,SUFU,SF1,HDAC9,ACACA,POLR2A,MLLT10,KMT2D,ARRB1,ZNF513,PRKCB,RARB,CKS1B,FGF2,CCNT2,MTHFS,CUX1,HNRNPK,HSF2,DDX17,USP2,DAPK1,DAB2,NACA,GTF3C3,ADK,SMARCA2,NDUFA12,LARP7,NFIX,NR1D1,ELP4,CCND3,COA3,HDAC1,URI1,PPRC1,LARP1B,FZD5,ZNF772,LGR4,CELSR2,SIN3A,PC…
GO:BP	regulation of macromolecule metabolic process	GO:0060255	9.89e-09	8.00472	6842	384	189	21092	FLT3,APP,PTPN11,PRKAG2,PRKN,MAP2K1,TBX3,GLI3,PHF6,SOX2,FER,LRP8,UBQLN1,TGFB3,MAP3K7,CSNK2A1,SMAD3,TSG101,TOP1,RBM10,TAF9B,DDX3X,CTNNB1,LEF1,IRS1,OGT,POU6F2,RREB1,ADAM9,INHA,SUFU,SF1,RDX,HDAC9,MLLT10,KMT2D,ARRB1,ZNF513,PRKCB,RARB,CKS1B,FGF2,NRDC,CCNT2,CUX1,DNAJB2,HNRNPK,HSF2,DDX17,USP2,HNRNPM,DAPK1,FZD8,DAB2,AFF4,NACA,RBM5,ACIN1,BBC3,SMARCA2,SF3B4,LARP7,NFIX,NR1D1,ELP4,PPP1R9B,CCND3,FMN2,COA3,HDAC…
GO:BP	regulation of transport	GO:0051049	1.21e-08	7.91701	1750	384	74	21092	APP,PTPN11,PRKAG2,PRKN,MAP2K1,GLI3,SYN1,NDUFAF2,PPT1,BCR,FER,UBQLN1,TGFB3,SCN1A,SMAD3,TSG101,CTNNB1,IRS1,ADAM9,INHA,SUFU,RDX,ARRB1,PRKCB,HNRNPK,ASIC2,DAPK1,CACNB3,DAB2,CACNG2,BBC3,CACNA1G,CHRM3,NR1D1,KCNH5,ABCA5,KCNH7,ATP1A1,KCNQ5,FZD5,DNAJC13,GRIN2D,PCSK1,GIT1,DIAPH1,SCYL2,RIMS2,PLCG2,MAPK3,STXBP1,KMT2A,CLIC4,AAK1,SCRIB,WNK3,KCNK10,CACNA1E,REST,EFNA5,SPTBN4,CACNA1I,AHCYL1,PSEN1,TENM1,GRIPAP1,NKA…
GO:BP	generation of neurons	GO:0048699	1.38e-08	7.86079	1465	384	66	21092	APP,PTPN11,PRKN,MAP2K1,GLI3,SYN1,SOX2,PPT1,LRP8,CTNNB1,LEF1,MCF2,SUFU,SLC4A10,HDAC9,ROBO2,FGF2,CUX1,FZD8,PRKG1,DAB2,PPP1R9B,TUBB2A,HDAC1,PREX2,FZD5,ULK4,SEZ6,SDK1,COBL,CELSR2,SIN3A,GIT1,SCYL2,ATP2B2,RIMS2,FZD2,STXBP1,POU3F2,PPP2R5B,SYNGAP1,SCRIB,EOMES,USP9X,CDK6,ADGRL3,REST,EFNA5,SEMA5A,SEMA3A,PLXNA4,CPEB3,NTRK3,SPTBN4,PSEN1,BMPR2,TOX,TRIOBP,TENM1,PAK6,NBL1,CHD5,IMPACT,CREB3L2,TRIM67,LRIG2
GO:BP	positive regulation of macromolecule biosynthetic process	GO:0010557	2.37e-08	7.62589	1925	384	78	21092	APP,PRKN,MAP2K1,TBX3,GLI3,SOX2,TGFB3,SMAD3,TSG101,DDX3X,CTNNB1,LEF1,IRS1,OGT,RREB1,MLLT10,KMT2D,ARRB1,ZNF513,PRKCB,RARB,FGF2,CCNT2,HNRNPK,HSF2,DDX17,DAB2,NACA,SMARCA2,LARP7,NFIX,NR1D1,COA3,HDAC1,PPRC1,LARP1B,FZD5,LGR4,SIN3A,RPS4X,ZNF507,CHD8,TFE3,FZD2,MAPK3,MAPK7,RFC3,POU3F2,KMT2A,PPP2R5B,SCAF8,KLF13,PHIP,ING3,RASL11A,COL1A1,TCF20,EOMES,KMT2C,CREBBP,ZBTB7C,ZNF225,REST,CPEB3,ZFP90,PSEN1,BMPR2,HMGA…
GO:BP	cell junction organization	GO:0034330	3.22e-08	7.49277	703	384	42	21092	APP,SYN1,DCTN1,BCR,FER,LRP8,TGFB3,SMAD3,IL1RAPL2,CTNNB1,RDX,ROBO2,DST,STAU1,ASIC2,CACNB3,CACNG2,THSD1,FZD5,SEZ6,SDK1,DCHS1,CDH10,SYNGAP1,LRRTM3,PLEC,CDH24,ADGRL3,REST,EFNA5,NTRK3,PSEN1,DLC1,GRIPAP1,IGSF21,CXADR,GRIN2B,UNC13B,CHD4,KDR,CSK,RAMP2
GO:BP	regulation of metabolic process	GO:0019222	5.94e-08	7.22634	7377	384	197	21092	FLT3,APP,PTPN11,PRKAG2,PRKN,MAP2K1,TBX3,GLI3,PHF6,SOX2,BCR,FER,LRP8,UBQLN1,TGFB3,MAP3K7,CSNK2A1,SMAD3,TSG101,TOP1,ATP6V1G2,RBM10,TAF9B,DDX3X,CTNNB1,LEF1,IRS1,OGT,POU6F2,ITPR1,RREB1,ADAM9,INHA,SUFU,SF1,ATG16L1,RDX,HDAC9,MLLT10,KMT2D,FAP,ARRB1,ZNF513,PRKCB,RARB,CKS1B,FGF2,NRDC,CCNT2,CUX1,DNAJB2,HNRNPK,HSF2,DDX17,USP2,HNRNPM,DAPK1,FZD8,DAB2,AFF4,NACA,RBM5,ACIN1,BBC3,SMARCA2,SF3B4,LARP7,WDR81,NFIX,NR…
GO:BP	cellular biosynthetic process	GO:0044249	6.16e-08	7.21048	5782	384	165	21092	APP,PRKAG2,EXT2,CYP46A1,PRKN,MAP2K1,TBX3,GLI3,PHF6,SOX2,PPT1,FER,LRP8,TGFB3,GALNT2,MAP3K7,SMAD3,TSG101,PAPSS2,RBM10,TAF9B,DDX3X,CTNNB1,LEF1,IRS1,OGT,POU6F2,RREB1,TCEAL4,INHA,CDKAL1,SUFU,SF1,ATG16L1,HDAC9,ACACA,POLR2A,MLLT10,KMT2D,ARRB1,ZNF513,PRKCB,RARB,CKS1B,FGF2,CCNT2,MTHFS,CUX1,HNRNPK,HSF2,DDX17,USP2,CHST2,DAPK1,DAB2,NACA,GTF3C3,ADK,SMARCA2,NDUFA12,LARP7,NFIX,NR1D1,ELP4,POGLUT1,STT3B,FAR1,CCND…
GO:BP	regulation of molecular function	GO:0065009	6.49e-08	7.18796	3055	384	105	21092	FLT3,APP,PRKAG2,PRKN,MAP2K1,GLI3,SOX2,PPT1,BCR,FER,LRP8,UBQLN1,MAP3K7,CSNK2A1,SMAD3,PPP2R1B,TSG101,DDX3X,CTNNB1,LEF1,IRS1,ADAM9,MCF2,SUFU,RDX,HDAC9,ARHGEF12,ARRB1,PRKCB,CKS1B,FGF2,NRDC,CCNT2,DNAJB2,HNRNPK,ADAM15,DAPK1,FZD8,PRKG1,CACNB3,DAB2,RCAN2,CACNG2,BBC3,CHRM3,WDR81,ARHGEF40,ELP4,PPP1R9B,CCND3,HDAC1,PREX2,URI1,RASAL2,PPRC1,FZD5,LGR4,SIN3A,GIT1,MYO9B,NOSIP,DLGAP2,FZD2,PLCG2,MAPK3,MAPK7,RFC3,KM…
GO:BP	anatomical structure morphogenesis	GO:0009653	6.57e-08	7.18243	2722	384	97	21092	APP,PTPN11,EXT2,FBXW4,ANKH,PRKN,MAP2K1,TBX3,GLI3,SOX2,BCR,FER,LRP8,TGFB3,SMAD3,PPP2R1B,ITGA7,CTNNB1,LEF1,ITPR1,RREB1,ADAM9,MCF2,NEBL,SUFU,SLC4A10,RDX,HDAC9,JAK1,ROBO2,FAP,PRKCB,RARB,FGF2,CUX1,ADAM15,FZD8,DAB2,NACA,KLHL3,POGLUT1,COL12A1,FAT1,HDAC1,PREX2,FZD5,SDK1,COBL,LGR4,CELSR2,SIN3A,BTBD7,DIAPH1,RIMS2,FZD2,MAPK3,MAPK7,STXBP1,DCHS1,POU3F2,CDH10,SYNGAP1,CLIC4,SCRIB,PHIP,TMEM135,COL1A1,EOMES,USP9X…
GO:BP	regulation of response to stimulus	GO:0048583	6.76e-08	7.17003	3970	384	126	21092	FLT3,APP,PTPN11,PRKN,MAP2K1,GLI3,NDUFAF2,SOX2,BCR,FER,LRP8,UBQLN1,TGFB3,MAP3K7,CSNK2A1,SMAD3,PPP2R1B,TSG101,TAF9B,DDX3X,GRM1,CTNNB1,PTCH2,LEF1,IRS1,OGT,ITPR1,RREB1,ADAM9,MCF2,INHA,SUFU,RDX,ROBO2,KMT2D,ARHGEF12,FAP,ARRB1,PRKCB,FGF2,HNRNPK,BICC1,USP2,DAPK1,GLRX3,FZD8,PRKG1,CACNB3,DAB2,CACNG2,BBC3,SMARCA2,NR1D1,USP20,ARHGEF40,POGLUT1,PPP1R9B,CCND3,FMN2,HDAC1,PREX2,URI1,FZD5,ULK4,SEZ6,LGR4,GRIN2D,SIN…
GO:BP	regulation of developmental process	GO:0050793	1.05e-07	6.97872	2499	384	91	21092	APP,PTPN11,ANKH,PRKN,MAP2K1,TBX3,GLI3,SOX2,BCR,LRP8,TGFB3,SMAD3,ITGA7,CTNNB1,PTCH2,LEF1,MEX3C,KIAA1109,OGT,RREB1,ADAM9,MCF2,INHA,SUFU,RDX,HDAC9,JAK1,ROBO2,PRKCB,RARB,FGF2,CCNT2,CUX1,DDX17,ASIC2,DAB2,NACA,ACIN1,SMARCA2,NR1D1,POGLUT1,ABCA5,HDAC1,SEZ6,SDK1,COBL,LGR4,CELSR2,SIN3A,BTBD7,TFE3,DIAPH1,RIMS2,FZD2,CTSC,MAPK7,POU3F2,SYNGAP1,KLF13,TENT5A,PHIP,TMEM135,LRRTM3,COL1A1,CDK6,ZBTB7C,REST,EFNA5,SEMA…
GO:BP	neuron differentiation	GO:0030182	1.11e-07	6.95554	1393	384	62	21092	APP,PTPN11,PRKN,MAP2K1,GLI3,SYN1,SOX2,PPT1,LRP8,CTNNB1,MCF2,SUFU,SLC4A10,HDAC9,ROBO2,FGF2,CUX1,FZD8,PRKG1,DAB2,PPP1R9B,HDAC1,PREX2,FZD5,ULK4,SEZ6,SDK1,COBL,CELSR2,SIN3A,GIT1,SCYL2,ATP2B2,RIMS2,FZD2,STXBP1,POU3F2,PPP2R5B,SYNGAP1,SCRIB,EOMES,USP9X,REST,EFNA5,SEMA5A,SEMA3A,PLXNA4,CPEB3,NTRK3,SPTBN4,PSEN1,BMPR2,TOX,TRIOBP,TENM1,PAK6,NBL1,CHD5,IMPACT,CREB3L2,TRIM67,LRIG2
GO:BP	cell-cell signaling	GO:0007267	1.7e-07	6.76948	1663	384	69	21092	APP,PTPN11,CYP46A1,FBXW4,PRKN,TBX3,GLI3,SYN1,NDUFAF2,SOX2,PPT1,BCR,LRP8,CSNK2A1,SMAD3,DDX3X,GRM1,CTNNB1,LEF1,IRS1,INHA,SLC4A10,PRKCB,FGF2,STAU1,BICC1,ASIC2,FZD8,CACNB3,DAB2,CACNG2,CACNA1G,CHRM3,NR1D1,PPP1R9B,FAT1,HDAC1,FZD5,SEZ6,LGR4,CELSR2,GRIN2D,PCSK1,GIT1,CHD8,SCYL2,DLGAP2,RIMS2,FZD2,PLCG2,STXBP1,KMT2A,SYNGAP1,SCRIB,INSYN2A,COL1A1,CACNA1E,REST,EFNA5,SEMA5A,CPEB3,AMER2,PSEN1,CXADR,GRIN2B,UNC13B…
GO:BP	positive regulation of DNA-templated transcription	GO:0045893	1.83e-07	6.73841	1703	384	70	21092	APP,PRKN,MAP2K1,TBX3,GLI3,SOX2,TGFB3,SMAD3,TSG101,DDX3X,CTNNB1,LEF1,OGT,RREB1,MLLT10,KMT2D,ARRB1,ZNF513,PRKCB,RARB,FGF2,CCNT2,HNRNPK,HSF2,DDX17,DAB2,NACA,SMARCA2,LARP7,NFIX,NR1D1,HDAC1,PPRC1,FZD5,LGR4,SIN3A,ZNF507,CHD8,TFE3,FZD2,MAPK3,MAPK7,POU3F2,KMT2A,PPP2R5B,SCAF8,KLF13,PHIP,ING3,RASL11A,COL1A1,TCF20,EOMES,KMT2C,CREBBP,ZBTB7C,ZNF225,REST,ZFP90,PSEN1,BMPR2,HMGA1,MTOR,ING4,CHD6,CDH13,CHD4,CDKN1C…
GO:BP	positive regulation of nucleic acid-templated transcription	GO:1903508	1.83e-07	6.73841	1703	384	70	21092	APP,PRKN,MAP2K1,TBX3,GLI3,SOX2,TGFB3,SMAD3,TSG101,DDX3X,CTNNB1,LEF1,OGT,RREB1,MLLT10,KMT2D,ARRB1,ZNF513,PRKCB,RARB,FGF2,CCNT2,HNRNPK,HSF2,DDX17,DAB2,NACA,SMARCA2,LARP7,NFIX,NR1D1,HDAC1,PPRC1,FZD5,LGR4,SIN3A,ZNF507,CHD8,TFE3,FZD2,MAPK3,MAPK7,POU3F2,KMT2A,PPP2R5B,SCAF8,KLF13,PHIP,ING3,RASL11A,COL1A1,TCF20,EOMES,KMT2C,CREBBP,ZBTB7C,ZNF225,REST,ZFP90,PSEN1,BMPR2,HMGA1,MTOR,ING4,CHD6,CDH13,CHD4,CDKN1C…
GO:BP	positive regulation of RNA biosynthetic process	GO:1902680	2.13e-07	6.67079	1709	384	70	21092	APP,PRKN,MAP2K1,TBX3,GLI3,SOX2,TGFB3,SMAD3,TSG101,DDX3X,CTNNB1,LEF1,OGT,RREB1,MLLT10,KMT2D,ARRB1,ZNF513,PRKCB,RARB,FGF2,CCNT2,HNRNPK,HSF2,DDX17,DAB2,NACA,SMARCA2,LARP7,NFIX,NR1D1,HDAC1,PPRC1,FZD5,LGR4,SIN3A,ZNF507,CHD8,TFE3,FZD2,MAPK3,MAPK7,POU3F2,KMT2A,PPP2R5B,SCAF8,KLF13,PHIP,ING3,RASL11A,COL1A1,TCF20,EOMES,KMT2C,CREBBP,ZBTB7C,ZNF225,REST,ZFP90,PSEN1,BMPR2,HMGA1,MTOR,ING4,CHD6,CDH13,CHD4,CDKN1C…
GO:BP	regulation of biological quality	GO:0065008	2.17e-07	6.66398	3726	384	119	21092	FLT3,APP,PTPN11,EXT2,CYP46A1,ANKH,PRKN,TBX3,SYN1,DCTN1,NDUFAF2,PPT1,BCR,FER,LRP8,SCN1A,SMAD3,PAPSS2,RBM10,IL1RAPL2,TAF9B,DDX3X,GRM1,CTNNB1,MEX3C,IRS1,OGT,ITPR1,INHA,SLC4A10,RDX,HDAC9,ACACA,ROBO2,FAP,PRKCB,FGF2,NRDC,STAU1,DNAJB2,ASIC2,USP2,HNRNPM,GLRX3,PRKG1,CACNB3,DAB2,ACIN1,CACNG2,BBC3,CACNA1G,CHRM3,KLHL3,WDR81,NR1D1,KCNH5,ABCA5,KCNH7,ATP1A1,URI1,SEZ6,LGR4,KCTD17,CELSR2,GRIN2D,SIN3A,PCSK1,L3MBTL…
GO:BP	growth	GO:0040007	2.4e-07	6.61929	972	384	49	21092	APP,PTPN11,PRKN,GLI3,SOX2,PPT1,CSNK2A1,SMAD3,TSG101,TAF9B,DDX3X,CTNNB1,PTCH2,MEX3C,KIAA1109,SLC4A10,KMT2D,RARB,FGF2,DNAJB2,ADAM15,DAB2,NACA,BBC3,SMARCA2,PPP1R9B,URI1,RASAL2,COBL,SIN3A,RIMS2,POU3F2,CLIC4,ING3,DIPK2A,USP9X,PLEC,EFNA5,SEMA5A,SEMA3A,PLXNA4,SPTBN4,BMPR2,CXADR,PAK6,MTOR,ING4,IMPACT,PKDCC
GO:BP	positive regulation of biosynthetic process	GO:0009891	3.08e-07	6.5111	2069	384	79	21092	APP,PRKN,MAP2K1,TBX3,GLI3,SOX2,TGFB3,SMAD3,TSG101,DDX3X,CTNNB1,LEF1,IRS1,OGT,RREB1,MLLT10,KMT2D,ARRB1,ZNF513,PRKCB,RARB,FGF2,CCNT2,HNRNPK,HSF2,DDX17,DAB2,NACA,SMARCA2,LARP7,NFIX,NR1D1,COA3,HDAC1,PPRC1,LARP1B,FZD5,LGR4,SIN3A,RPS4X,ZNF507,CHD8,TFE3,FZD2,PLCG2,MAPK3,MAPK7,RFC3,POU3F2,KMT2A,PPP2R5B,SCAF8,KLF13,PHIP,ING3,RASL11A,COL1A1,TCF20,EOMES,KMT2C,CREBBP,ZBTB7C,ZNF225,REST,CPEB3,ZFP90,PSEN1,BMPR…
GO:BP	signaling	GO:0023052	3.35e-07	6.47519	6492	384	177	21092	FLT3,APP,PTPN11,PRKAG2,EXT2,CYP46A1,FBXW4,PRKN,MAP2K1,TBX3,GLI3,SYN1,NDUFAF2,SOX2,PPT1,BCR,FER,LRP8,UBQLN1,TGFB3,SCN1A,MAP3K7,CSNK2A1,SMAD3,PPP2R1B,TSG101,ITGA7,RAB33A,IL1RAPL2,TAF9B,DDX3X,GRM1,CTNNB1,PTCH2,LEF1,IRS1,OGT,ITPR1,ADAM9,MCF2,GPR34,INHA,SUFU,SLC4A10,RDX,JAK1,ROBO2,KMT2D,ARHGEF12,ARRB1,PRKCB,RARB,FGF2,DST,STAU1,HNRNPK,DDX17,ADAM15,BICC1,ASIC2,USP2,DAPK1,FZD8,PRKG1,CACNB3,DAB2,RCAN2,CAC…
GO:BP	positive regulation of nucleobase-containing compound metabolic process	GO:0045935	4.69e-07	6.32909	2048	384	78	21092	APP,PRKN,MAP2K1,TBX3,GLI3,SOX2,TGFB3,SMAD3,TSG101,DDX3X,CTNNB1,LEF1,OGT,RREB1,MLLT10,KMT2D,ARRB1,ZNF513,PRKCB,RARB,FGF2,CCNT2,HNRNPK,HSF2,DDX17,DAB2,NACA,SMARCA2,SF3B4,LARP7,NFIX,NR1D1,FMN2,HDAC1,PPRC1,FZD5,LGR4,SIN3A,ZNF507,CHD8,TFE3,FZD2,MAPK3,MAPK7,RFC3,POU3F2,KMT2A,PPP2R5B,SCAF8,KLF13,PHIP,ING3,RNF168,RASL11A,COL1A1,TCF20,EOMES,USP9X,KMT2C,CREBBP,ZBTB7C,ZNF225,REST,CPEB3,ZFP90,PSEN1,BMPR2,TOX…
GO:BP	tissue development	GO:0009888	5.03e-07	6.29808	1973	384	76	21092	PTPN11,EXT2,FBXW4,ANKH,MAP2K1,TBX3,GLI3,SOX2,BCR,FER,TGFB3,SMAD3,TSG101,ITGA7,CTNNB1,PTCH2,LEF1,MEX3C,KIAA1109,RREB1,ADAM9,NEBL,SUFU,RDX,HDAC9,ROBO2,TST,RARB,FGF2,CCNT2,DDX17,ADAM15,DAB2,NACA,CACNA1G,KLHL3,POGLUT1,COL12A1,FAT1,HDAC1,RASAL2,FZD5,COBL,LGR4,CELSR2,BTBD7,FZD2,MAPK3,DCHS1,POU3F2,CLIC4,SCRIB,TENT5A,DIPK2A,COL1A1,EOMES,CDK6,PLEC,SEMA5A,SEMA3A,C1GALT1,PLXNA4,AMER2,PSEN1,BMPR2,TOX,TIMP1,T…
GO:BP	regulation of gene expression	GO:0010468	5.21e-07	6.2831	5494	384	156	21092	APP,PTPN11,PRKN,MAP2K1,TBX3,GLI3,PHF6,SOX2,FER,LRP8,TGFB3,MAP3K7,SMAD3,TSG101,TOP1,RBM10,TAF9B,DDX3X,CTNNB1,LEF1,OGT,POU6F2,RREB1,INHA,SUFU,SF1,RDX,HDAC9,MLLT10,KMT2D,ARRB1,ZNF513,PRKCB,RARB,CKS1B,FGF2,CCNT2,CUX1,HNRNPK,HSF2,DDX17,USP2,HNRNPM,DAPK1,DAB2,AFF4,NACA,RBM5,ACIN1,SMARCA2,SF3B4,LARP7,NFIX,NR1D1,ELP4,CCND3,COA3,HDAC1,URI1,RASAL2,PPRC1,LARP1B,FZD5,ZNF772,LGR4,CELSR2,SIN3A,RPS4X,L3MBTL3,GI…
GO:BP	cellular response to endogenous stimulus	GO:0071495	6.71e-07	6.17357	1348	384	59	21092	FLT3,APP,PTPN11,EXT2,PRKN,FER,TGFB3,MAP3K7,SMAD3,CTNNB1,LEF1,IRS1,OGT,ADAM9,RDX,HDAC9,ACACA,JAK1,ROBO2,KMT2D,PRKCB,RARB,FGF2,DDX17,DAB2,CHRM3,NR1D1,PPP1R9B,CCND3,HDAC1,ATP1A1,URI1,LGR4,SIN3A,PEG10,DIAPH1,MAPK3,MAPK7,LEMD3,PHIP,COL1A1,USP9X,CREBBP,LTBP2,REST,EFNA5,CPEB3,NTRK3,AHCYL1,PSEN1,BMPR2,MTOR,CDKN1C,KDR,CSK,NBL1,RAMP2,IMPACT,ABHD2
GO:BP	cell communication	GO:0007154	7.4e-07	6.13091	6551	384	177	21092	FLT3,APP,PTPN11,PRKAG2,EXT2,CYP46A1,FBXW4,PRKN,MAP2K1,TBX3,GLI3,SYN1,NDUFAF2,SOX2,PPT1,BCR,FER,LRP8,UBQLN1,TGFB3,SCN1A,MAP3K7,CSNK2A1,SMAD3,PPP2R1B,TSG101,ITGA7,RAB33A,IL1RAPL2,TAF9B,DDX3X,GRM1,CTNNB1,PTCH2,LEF1,IRS1,OGT,ITPR1,ADAM9,MCF2,GPR34,INHA,SUFU,SLC4A10,RDX,JAK1,ROBO2,KMT2D,ARHGEF12,ARRB1,PRKCB,RARB,FGF2,DST,STAU1,HNRNPK,DDX17,ADAM15,BICC1,ASIC2,USP2,DAPK1,FZD8,PRKG1,CACNB3,DAB2,RCAN2,CAC…
GO:BP	positive regulation of cellular biosynthetic process	GO:0031328	8.16e-07	6.08847	2033	384	77	21092	APP,PRKN,MAP2K1,TBX3,GLI3,SOX2,TGFB3,SMAD3,TSG101,DDX3X,CTNNB1,LEF1,IRS1,OGT,RREB1,MLLT10,KMT2D,ARRB1,ZNF513,PRKCB,RARB,FGF2,CCNT2,HNRNPK,HSF2,DDX17,DAB2,NACA,SMARCA2,LARP7,NFIX,NR1D1,COA3,HDAC1,PPRC1,LARP1B,FZD5,LGR4,SIN3A,RPS4X,ZNF507,CHD8,TFE3,FZD2,MAPK3,MAPK7,RFC3,POU3F2,KMT2A,PPP2R5B,SCAF8,KLF13,PHIP,ING3,RASL11A,COL1A1,TCF20,EOMES,KMT2C,CREBBP,ZBTB7C,ZNF225,REST,CPEB3,ZFP90,PSEN1,BMPR2,HMGA…
GO:BP	positive regulation of RNA metabolic process	GO:0051254	8.82e-07	6.05431	1842	384	72	21092	APP,PRKN,MAP2K1,TBX3,GLI3,SOX2,TGFB3,SMAD3,TSG101,DDX3X,CTNNB1,LEF1,OGT,RREB1,MLLT10,KMT2D,ARRB1,ZNF513,PRKCB,RARB,FGF2,CCNT2,HNRNPK,HSF2,DDX17,DAB2,NACA,SMARCA2,SF3B4,LARP7,NFIX,NR1D1,HDAC1,PPRC1,FZD5,LGR4,SIN3A,ZNF507,CHD8,TFE3,FZD2,MAPK3,MAPK7,POU3F2,KMT2A,PPP2R5B,SCAF8,KLF13,PHIP,ING3,RASL11A,COL1A1,TCF20,EOMES,KMT2C,CREBBP,ZBTB7C,ZNF225,REST,CPEB3,ZFP90,PSEN1,BMPR2,HMGA1,MTOR,ING4,CHD6,CDH13…
GO:BP	regulation of multicellular organismal process	GO:0051239	1.4763e-06	5.83082	2753	384	94	21092	APP,PTPN11,ANKH,MAP2K1,TBX3,GLI3,BCR,LRP8,TGFB3,MAP3K7,SMAD3,DDX3X,GRM1,CTNNB1,PTCH2,LEF1,KIAA1109,OGT,RREB1,ADAM9,MCF2,INHA,HDAC9,JAK1,ROBO2,FAP,ARRB1,PRKCB,RARB,FGF2,NRDC,CUX1,HNRNPK,ASIC2,GLRX3,PRKG1,DAB2,ACIN1,CACNA1G,CHRM3,SMARCA2,NR1D1,POGLUT1,HDAC1,ATP1A1,FZD5,LGR4,GRIN2D,SIN3A,BTBD7,GIT1,STMP1,TFE3,POLA1,ATP2B2,DLGAP2,RIMS2,CTSC,PLCG2,MAPK3,MAPK7,POU3F2,SYNGAP1,ALMS1,SCRIB,KLF13,TENT5A,LR…
GO:BP	cell growth	GO:0016049	1.5702e-06	5.80404	497	384	32	21092	APP,PRKN,PPT1,CSNK2A1,SMAD3,TSG101,TAF9B,DDX3X,CTNNB1,PTCH2,MEX3C,KIAA1109,KMT2D,DNAJB2,ADAM15,DAB2,SMARCA2,PPP1R9B,URI1,COBL,SIN3A,RIMS2,USP9X,EFNA5,SEMA5A,SEMA3A,PLXNA4,BMPR2,PAK6,MTOR,ING4,IMPACT
GO:BP	cell morphogenesis	GO:0000902	1.7138e-06	5.76604	1030	384	49	21092	APP,PTPN11,PRKN,MAP2K1,GLI3,FER,LRP8,ITGA7,CTNNB1,LEF1,ITPR1,RREB1,MCF2,RDX,ROBO2,CUX1,DAB2,FAT1,PREX2,COBL,CELSR2,SIN3A,DIAPH1,RIMS2,STXBP1,DCHS1,POU3F2,CDH10,SYNGAP1,CLIC4,SCRIB,PHIP,USP9X,PLEC,CDH24,EFNA5,SEMA5A,SEMA3A,PLXNA4,SPTBN4,PSEN1,BMPR2,TRIOBP,DLC1,PAK6,KDR,NBL1,FGD6,IMPACT
GO:BP	forebrain development	GO:0030900	2.1365e-06	5.67029	394	384	28	21092	APP,TBX3,GLI3,SOX2,LRP8,CTNNB1,LEF1,SLC4A10,ROBO2,RARB,FGF2,PRKG1,PPP1R9B,HDAC1,DPCD,SIN3A,PCSK1,SCYL2,POU3F2,EOMES,CDK6,SEMA5A,SEMA3A,PLXNA4,PSEN1,TOX,DLC1,CHD5
GO:BP	macromolecule modification	GO:0043412	2.5531e-06	5.59293	3874	384	119	21092	FLT3,APP,PTPN11,PRKAG2,EXT2,PRKN,MAP2K1,PPT1,BCR,FER,LRP8,UBQLN1,TGFB3,GALNT2,MAP3K7,CSNK2A1,PPP2R1B,TSG101,TOP1,MANBA,DDX3X,CTNNB1,LEF1,MEX3C,OGT,ADAM9,TTLL5,INHA,CDKAL1,ATG16L1,HDAC9,JAK1,KMT2D,ARRB1,PRKCB,CKS1B,FGF2,CCNT2,DNAJB2,USP2,DAPK1,FZD8,PRKG1,DAB2,CHRM3,KLHL3,LARP7,PUS3,USP20,ELP4,POGLUT1,STT3B,PPP1R9B,CCND3,STT3A,TRIT1,RSPRY1,HDAC1,FZD5,ULK4,KLHL9,SIN3A,NOSIP,ZDHHC20,SCYL2,PLCG2,MAPK3…
GO:BP	cell motility	GO:0048870	2.7662e-06	5.55811	1698	384	67	21092	APP,PTPN11,MAP2K1,GLI3,BCR,FER,LRP8,SMAD3,ITGA7,CTNNB1,LEF1,OGT,RREB1,ADAM9,CFAP251,RDX,HDAC9,FAP,FGF2,DST,ADAM15,CHST2,PRKG1,DAB2,PPP1R9B,TUBB2A,FAT1,HDAC1,ULK4,DPCD,CELSR2,SIN3A,IFT81,KIF2A,DIAPH1,PLCG2,MAPK3,DCHS1,POU3F2,CLIC4,SCRIB,COL1A1,EOMES,USP9X,CDK6,PLEC,ADGRL3,SEMA5A,SEMA3A,PLXNA4,TTBK2,NTRK3,CACNA1I,PSEN1,BMPR2,TIMP1,DLC1,CXADR,MTOR,SLC12A2,CDH13,CSPG4,KDR,NBL1,ABHD2,DNAH7,LRIG2
GO:BP	neuron development	GO:0048666	3.5433e-06	5.4506	1122	384	51	21092	APP,PTPN11,PRKN,MAP2K1,GLI3,SYN1,PPT1,LRP8,CTNNB1,MCF2,SLC4A10,ROBO2,CUX1,PRKG1,DAB2,PPP1R9B,PREX2,ULK4,SEZ6,SDK1,COBL,CELSR2,SIN3A,GIT1,SCYL2,RIMS2,FZD2,STXBP1,POU3F2,PPP2R5B,SYNGAP1,SCRIB,USP9X,EFNA5,SEMA5A,SEMA3A,PLXNA4,CPEB3,NTRK3,SPTBN4,PSEN1,BMPR2,TOX,TRIOBP,TENM1,PAK6,NBL1,IMPACT,CREB3L2,TRIM67,LRIG2
GO:BP	protein modification process	GO:0036211	5.1921e-06	5.28466	3649	384	113	21092	FLT3,APP,PTPN11,PRKAG2,EXT2,PRKN,MAP2K1,PPT1,BCR,FER,LRP8,UBQLN1,TGFB3,GALNT2,MAP3K7,CSNK2A1,PPP2R1B,TSG101,TOP1,MANBA,DDX3X,CTNNB1,LEF1,MEX3C,OGT,ADAM9,TTLL5,INHA,ATG16L1,HDAC9,JAK1,KMT2D,ARRB1,PRKCB,CKS1B,FGF2,CCNT2,DNAJB2,USP2,DAPK1,FZD8,PRKG1,DAB2,CHRM3,KLHL3,USP20,POGLUT1,STT3B,PPP1R9B,CCND3,STT3A,RSPRY1,HDAC1,FZD5,ULK4,KLHL9,SIN3A,NOSIP,ZDHHC20,SCYL2,PLCG2,MAPK3,MAPK7,UBE2H,KMT2A,PPP2R5B,AA…
GO:BP	positive regulation of transcription by RNA polymerase II	GO:0045944	5.4801e-06	5.26122	1243	384	54	21092	APP,PRKN,TBX3,GLI3,SOX2,TGFB3,SMAD3,DDX3X,CTNNB1,LEF1,OGT,RREB1,MLLT10,KMT2D,ARRB1,ZNF513,RARB,FGF2,CCNT2,HNRNPK,HSF2,DDX17,DAB2,NACA,SMARCA2,LARP7,NFIX,NR1D1,HDAC1,PPRC1,FZD5,SIN3A,ZNF507,CHD8,TFE3,MAPK3,MAPK7,POU3F2,KMT2A,PPP2R5B,KLF13,PHIP,TCF20,EOMES,KMT2C,CREBBP,ZBTB7C,ZNF225,REST,BMPR2,HMGA1,CHD6,CDH13,CREB3L2
GO:BP	phosphorylation	GO:0016310	8.4173e-06	5.07483	1862	384	70	21092	FLT3,APP,PTPN11,PRKAG2,PRKN,MAP2K1,BCR,FER,LRP8,TGFB3,MAP3K7,CSNK2A1,TSG101,PAPSS2,TOP1,DDX3X,IRS1,OGT,ADAM9,PGM1,INHA,JAK1,ARRB1,PRKCB,CKS1B,FGF2,CCNT2,DAPK1,FZD8,PRKG1,DAB2,ADK,KLHL3,WDR81,PPP1R9B,CCND3,FZD5,ULK4,PPIP5K2,GIT1,SCYL2,PLCG2,MAPK3,MAPK7,PPP2R5B,AAK1,PHIP,DIPK2A,CLK1,CDK6,WNK3,PLEC,EFNA5,TTBK2,NTRK3,SPTBN4,PSEN1,NDUFS4,BMPR2,TENM1,PAK6,MTOR,BMP2K,CDKN1C,RSRC1,CSPG4,KDR,CSK,IMPACT,PK…
GO:BP	response to endogenous stimulus	GO:0009719	8.459e-06	5.07268	1592	384	63	21092	FLT3,APP,PTPN11,EXT2,PRKN,GLI3,FER,TGFB3,MAP3K7,SMAD3,CTNNB1,LEF1,IRS1,OGT,ADAM9,RDX,HDAC9,ACACA,JAK1,ROBO2,KMT2D,PRKCB,RARB,FGF2,DDX17,DAB2,CHRM3,NR1D1,PPP1R9B,CCND3,HDAC1,ATP1A1,URI1,LGR4,SIN3A,PCSK1,PEG10,DIAPH1,MAPK3,MAPK7,LEMD3,PHIP,COL1A1,USP9X,CREBBP,LTBP2,REST,EFNA5,CPEB3,NTRK3,AHCYL1,PSEN1,BMPR2,TIMP1,MTOR,CDH13,CDKN1C,KDR,CSK,NBL1,RAMP2,IMPACT,ABHD2
GO:BP	protein phosphorylation	GO:0006468	1.1572e-05	4.93659	1567	384	62	21092	FLT3,APP,PTPN11,PRKAG2,PRKN,MAP2K1,BCR,FER,LRP8,TGFB3,MAP3K7,CSNK2A1,TSG101,TOP1,DDX3X,ADAM9,INHA,JAK1,ARRB1,PRKCB,CKS1B,FGF2,CCNT2,DAPK1,FZD8,PRKG1,DAB2,KLHL3,PPP1R9B,CCND3,FZD5,ULK4,SCYL2,PLCG2,MAPK3,MAPK7,PPP2R5B,AAK1,PHIP,DIPK2A,CLK1,CDK6,WNK3,PLEC,EFNA5,TTBK2,NTRK3,SPTBN4,PSEN1,NDUFS4,BMPR2,TENM1,PAK6,MTOR,BMP2K,CDKN1C,RSRC1,CSPG4,KDR,CSK,IMPACT,PKDCC
GO:BP	response to growth factor	GO:0070848	1.7141e-05	4.76597	702	384	37	21092	FLT3,APP,PTPN11,EXT2,SOX2,FER,LRP8,TGFB3,MAP3K7,SMAD3,CTNNB1,LEF1,OGT,ADAM9,RDX,PRKCB,FGF2,DAB2,PPP1R9B,HDAC1,URI1,SIN3A,PEG10,MAPK3,MAPK7,PPP2R5B,LEMD3,COL1A1,USP9X,CREBBP,LTBP2,NTRK3,BMPR2,CDKN1C,KDR,NBL1,RAMP2
GO:BP	protein metabolic process	GO:0019538	1.7781e-05	4.75006	5462	384	150	21092	FLT3,APP,PTPN11,PRKAG2,EXT2,FBXW4,PRKN,MAP2K1,GLI3,SOX2,PPT1,BCR,FER,LRP8,UBQLN1,TGFB3,GALNT2,MAP3K7,CSNK2A1,SMAD3,PPP2R1B,TSG101,TOP1,MANBA,DDX3X,CTNNB1,LEF1,MEX3C,OGT,TCEAL4,ADAM9,TTLL5,INHA,CDKAL1,SUFU,ATG16L1,RDX,HDAC9,ACACA,JAK1,KMT2D,FAP,ARRB1,PRKCB,CKS1B,FGF2,NRDC,CCNT2,DNAJB2,ADAM15,USP2,DAPK1,GLRX3,FZD8,PRKG1,DAB2,NACA,BBC3,CHRM3,KLHL3,WDR81,NR1D1,USP20,ELP4,POGLUT1,STT3B,PPP1R9B,CCND3,F…
GO:BP	cell surface receptor signaling pathway involved in cell-cell signaling	GO:1905114	1.9296e-05	4.71453	551	384	32	21092	APP,FBXW4,PRKN,GLI3,SOX2,CSNK2A1,SMAD3,DDX3X,CTNNB1,LEF1,FGF2,BICC1,FZD8,DAB2,HDAC1,FZD5,SEZ6,LGR4,CELSR2,GRIN2D,CHD8,SCYL2,RIMS2,FZD2,PLCG2,INSYN2A,COL1A1,SEMA5A,AMER2,PSEN1,GRIN2B,UNC13B
GO:BP	programmed cell death	GO:0012501	2.0274e-05	4.69305	1942	384	71	21092	FLT3,APP,PRKN,TBX3,GLI3,PPT1,LRP8,UBQLN1,TGFB3,MAP3K7,CSNK2A1,SMAD3,PPP2R1B,TOP1,RBM10,TAF9B,DDX3X,CTNNB1,LEF1,OGT,ITPR1,ROBO2,FAP,PRKCB,RARB,FGF2,HNRNPK,ASIC2,DAPK1,DAB2,NACA,RBM5,ACIN1,BBC3,FMN2,HDAC1,URI1,FZD5,SIN3A,CHD8,PEG10,CTSC,PLCG2,MAPK3,MAPK7,STXBP1,KMT2A,SYNGAP1,SCRIB,PHIP,ING3,DIPK2A,WNK3,REST,SEMA5A,SEMA3A,AHCYL1,PSEN1,SMNDC1,BMPR2,TIMP1,DLC1,TAX1BP1,UNC13B,PAK6,MTOR,ING4,KDR,RAMP2,R…
GO:BP	negative regulation of biological process	GO:0048519	2.1701e-05	4.66351	5918	384	159	21092	APP,PTPN11,PRKAG2,PRKN,MAP2K1,TBX3,GLI3,PHF6,NDUFAF2,SOX2,PPT1,BCR,FER,UBQLN1,TGFB3,CSNK2A1,SMAD3,TSG101,RBM10,TAF9B,DDX3X,CTNNB1,PTCH2,LEF1,IRS1,OGT,ITPR1,RREB1,MCF2,INHA,SUFU,SF1,RDX,HDAC9,ROBO2,KMT2D,FAP,ARRB1,PRKCB,RARB,FGF2,NRDC,CUX1,DNAJB2,HNRNPK,DDX17,ADAM15,BICC1,ASIC2,USP2,HNRNPM,DAPK1,GLRX3,PRKG1,DAB2,NACA,RBM5,ACIN1,BBC3,SMARCA2,LARP7,NFIX,NR1D1,PPP1R9B,ABCA5,CCND3,FMN2,HDAC1,ATP1A1,CL…
GO:BP	cell surface receptor signaling pathway	GO:0007166	2.2064e-05	4.65631	2816	384	92	21092	FLT3,APP,PTPN11,FBXW4,PRKN,GLI3,SOX2,FER,LRP8,TGFB3,MAP3K7,CSNK2A1,SMAD3,PPP2R1B,TSG101,ITGA7,IL1RAPL2,DDX3X,GRM1,CTNNB1,PTCH2,LEF1,IRS1,OGT,ADAM9,GPR34,INHA,SUFU,JAK1,ROBO2,ARRB1,PRKCB,FGF2,DST,ADAM15,BICC1,DAPK1,FZD8,CACNB3,DAB2,POGLUT1,CCND3,HDAC1,FZD5,SEZ6,LGR4,CELSR2,GRIN2D,SIN3A,IFT81,GIT1,MYO9B,CHD8,PEG10,SCYL2,RIMS2,FZD2,PLCG2,MAPK3,MAPK7,PPP2R5B,LEMD3,AAK1,PHIP,INSYN2A,COL1A1,USP9X,CDK6,…
GO:BP	response to organic substance	GO:0010033	2.2914e-05	4.63989	3034	384	97	21092	FLT3,APP,PTPN11,EXT2,PRKN,GLI3,NDUFAF2,SOX2,BCR,FER,LRP8,UBQLN1,TGFB3,MAP3K7,SMAD3,IL1RAPL2,CTNNB1,LEF1,IRS1,OGT,ADAM9,MCF2,RDX,HDAC9,ACACA,JAK1,ROBO2,POLR2A,KMT2D,PRKCB,RARB,FGF2,DNAJB2,DDX17,ADAM15,DAPK1,DAB2,BBC3,CHRM3,NR1D1,STT3B,PPP1R9B,CCND3,HDAC1,ATP1A1,URI1,RASAL2,STX8,FZD5,SDK1,YTHDC2,LGR4,SIN3A,PCSK1,RPS4X,GIT1,PEG10,DIAPH1,CTSC,PLCG2,MAPK3,MAPK7,RFC3,STXBP1,POU3F2,PPP2R5B,LEMD3,PHIP,UB…
GO:BP	negative regulation of cell population proliferation	GO:0008285	2.3966e-05	4.62041	711	384	37	21092	APP,MAP2K1,TBX3,GLI3,SOX2,TGFB3,SMAD3,TSG101,RBM10,CTNNB1,SF1,FAP,RARB,FGF2,DNAJB2,PRKG1,DAB2,RBM5,SMARCA2,FZD5,KMT2A,SCRIB,KLF13,CDK6,ZBTB7C,REST,DLEC1,BMPR2,TENM1,DLC1,HMGA1,CXADR,ING4,CDH13,CDKN1C,CSK,CHD5
GO:BP	positive regulation of cellular component organization	GO:0051130	2.6702e-05	4.57346	1050	384	47	21092	APP,PRKN,MAP2K1,DCTN1,PPT1,FER,LRP8,TGFB3,SMAD3,TSG101,DDX3X,CTNNB1,RREB1,ADAM9,ROBO2,ARRB1,CUX1,HNRNPK,ASIC2,CKAP5,DAB2,BBC3,COBL,KCTD17,SIN3A,GIT1,STMP1,SCYL2,PLCG2,MAPK3,PPP2R5B,PHIP,LRRTM3,EFNA5,SEMA5A,PLXNA4,NTRK3,PSEN1,BMPR2,TOX,TENM1,UNC13B,MTOR,KDR,RAD21,CREB3L2,TRIM67
GO:BP	response to stimulus	GO:0050896	3.1419e-05	4.50281	9000	384	218	21092	FLT3,APP,PTPN11,PRKAG2,EXT2,CYP46A1,FBXW4,ANKH,PRKN,MAP2K1,TBX3,GLI3,NDUFAF2,SOX2,PPT1,BCR,FER,LRP8,UBQLN1,TGFB3,SCN1A,MAP3K7,CSNK2A1,SMAD3,PPP2R1B,TSG101,PAPSS2,TOP1,ITGA7,RAB33A,IL1RAPL2,TAF9B,DDX3X,GRM1,CTNNB1,PTCH2,LEF1,NT5C3A,IRS1,OGT,ITPR1,RREB1,ADAM9,MCF2,GPR34,INHA,SUFU,SLC4A10,ATG16L1,RDX,HDAC9,ACACA,JAK1,ROBO2,POLR2A,KMT2D,ARHGEF12,FAP,ARRB1,ZNF513,PRKCB,RARB,FGF2,DST,STAU1,DNAJB2,HNRNP…
GO:BP	cell migration	GO:0016477	3.4023e-05	4.46823	1498	384	59	21092	APP,PTPN11,GLI3,BCR,FER,LRP8,SMAD3,ITGA7,CTNNB1,LEF1,OGT,RREB1,ADAM9,RDX,HDAC9,FAP,FGF2,ADAM15,CHST2,PRKG1,DAB2,PPP1R9B,TUBB2A,FAT1,HDAC1,ULK4,CELSR2,SIN3A,KIF2A,DIAPH1,PLCG2,MAPK3,DCHS1,POU3F2,CLIC4,SCRIB,COL1A1,EOMES,USP9X,PLEC,ADGRL3,SEMA5A,SEMA3A,PLXNA4,TTBK2,NTRK3,PSEN1,BMPR2,TIMP1,DLC1,CXADR,MTOR,SLC12A2,CDH13,CSPG4,KDR,NBL1,ABHD2,LRIG2
GO:BP	regulation of cellular localization	GO:0060341	3.98e-05	4.40012	959	384	44	21092	PTPN11,PRKN,MAP2K1,GLI3,NDUFAF2,TGFB3,SMAD3,TSG101,CTNNB1,IRS1,ADAM9,SUFU,RDX,DNAJB2,DAB2,NACA,CACNG2,BBC3,LARP7,NR1D1,PPP1R9B,CLTC,STX8,FZD5,DNAJC13,CELSR2,SIN3A,PCSK1,MAPK3,AAK1,WNK3,REST,EFNA5,TTBK2,PSEN1,TENM1,GRIPAP1,UNC13B,SLC12A2,USP7,CSK,PKDCC,TRIM67,LRIG2
GO:BP	plasma membrane bounded cell projection organization	GO:0120036	4.4194e-05	4.35464	1509	384	59	21092	APP,PTPN11,PRKN,MAP2K1,GLI3,DCTN1,FER,LRP8,TGFB3,CTNNB1,RREB1,MCF2,RDX,ROBO2,CUX1,PRKG1,DAB2,PPP1R9B,PREX2,ULK4,SEZ6,SDK1,COBL,KCTD17,CELSR2,SIN3A,IFT81,RIMS2,STXBP1,POU3F2,PPP2R5B,SYNGAP1,SCRIB,USP9X,EFNA5,SEMA5A,SEMA3A,PLXNA4,CPEB3,TTBK2,NTRK3,SPTBN4,PSEN1,BMPR2,TOX,TRIOBP,TENM1,GRIN2B,PAK6,MTOR,CDH13,CSPG4,NBL1,FGD6,IMPACT,CREB3L2,DNAH7,TRIM67,LRIG2
GO:BP	negative regulation of transcription by RNA polymerase II	GO:0000122	4.4946e-05	4.34731	963	384	44	21092	PRKN,TBX3,GLI3,PHF6,SOX2,SMAD3,TSG101,RBM10,TAF9B,CTNNB1,LEF1,OGT,RREB1,SUFU,HDAC9,RARB,CUX1,USP2,DAB2,NACA,SMARCA2,LARP7,NFIX,NR1D1,CCND3,HDAC1,URI1,SIN3A,CHD8,SCAF8,ZNF10,E2F6,EOMES,USP9X,CDK6,ZNF79,CREBBP,REST,CPEB3,ZFP90,PSEN1,CHD4,CHD5,IMPACT
GO:BP	peptidyl-amino acid modification	GO:0018193	4.6381e-05	4.33366	1286	384	53	21092	FLT3,APP,PTPN11,PRKAG2,MAP2K1,BCR,FER,LRP8,GALNT2,MAP3K7,CSNK2A1,TSG101,TOP1,CTNNB1,LEF1,OGT,TTLL5,HDAC9,JAK1,KMT2D,ARRB1,PRKCB,POGLUT1,STT3B,STT3A,SIN3A,ZDHHC20,PLCG2,MAPK3,MAPK7,KMT2A,PPP2R5B,ING3,CLK1,EOMES,WNK3,KMT2C,CREBBP,EFNA5,TTBK2,NTRK3,SPTBN4,PSEN1,TENM1,CAMKMT,MTOR,ING4,CSPG4,KDR,CSK,CHD5,NAA15,PKDCC
GO:BP	cell death	GO:0008219	4.9904e-05	4.30186	2107	384	74	21092	FLT3,APP,PRKN,TBX3,GLI3,PPT1,LRP8,UBQLN1,TGFB3,MAP3K7,CSNK2A1,SMAD3,PPP2R1B,TOP1,RBM10,TAF9B,DDX3X,CTNNB1,LEF1,OGT,ITPR1,ROBO2,FAP,PRKCB,RARB,FGF2,HNRNPK,ASIC2,DAPK1,DAB2,NACA,RBM5,ACIN1,BBC3,FMN2,HDAC1,URI1,FZD5,SIN3A,CHD8,PEG10,CTSC,PLCG2,MAPK3,MAPK7,STXBP1,KMT2A,SYNGAP1,SCRIB,PHIP,ING3,DIPK2A,WNK3,REST,SEMA5A,SEMA3A,NTRK3,AHCYL1,PSEN1,SMNDC1,BMPR2,TIMP1,DLC1,TAX1BP1,GRIN2B,UNC13B,PAK6,MTOR,ING…
GO:BP	circulatory system development	GO:0072359	5.2424e-05	4.28047	1109	384	48	21092	PTPN11,MAP2K1,TBX3,GLI3,SMAD3,CTNNB1,LEF1,NEBL,SUFU,HDAC9,JAK1,ROBO2,FAP,PRKCB,RARB,FGF2,ADAM15,BICC1,FZD8,NACA,CACNA1G,POGLUT1,FZD5,FZD2,MAPK3,MAPK7,DCHS1,CLIC4,DIPK2A,COL1A1,EOMES,PLEC,REST,SEMA5A,C1GALT1,PLXNA4,NTRK3,PSEN1,BMPR2,DLC1,CXADR,MTOR,SLC12A2,CDH13,CSPG4,KDR,RAMP2,NAA15
GO:BP	neuron projection development	GO:0031175	5.5498e-05	4.25572	970	384	44	21092	APP,PTPN11,PRKN,MAP2K1,GLI3,LRP8,CTNNB1,MCF2,ROBO2,CUX1,PRKG1,DAB2,PPP1R9B,PREX2,ULK4,SEZ6,SDK1,COBL,CELSR2,SIN3A,RIMS2,STXBP1,POU3F2,PPP2R5B,SYNGAP1,SCRIB,USP9X,EFNA5,SEMA5A,SEMA3A,PLXNA4,CPEB3,NTRK3,SPTBN4,PSEN1,BMPR2,TOX,TRIOBP,PAK6,NBL1,IMPACT,CREB3L2,TRIM67,LRIG2
GO:BP	regulation of intracellular signal transduction	GO:1902531	5.7681e-05	4.23897	1714	384	64	21092	FLT3,APP,PTPN11,PRKN,MAP2K1,SOX2,BCR,UBQLN1,TGFB3,MAP3K7,TAF9B,DDX3X,GRM1,CTNNB1,OGT,ITPR1,ADAM9,MCF2,RDX,ARHGEF12,ARRB1,PRKCB,FGF2,HNRNPK,USP2,FZD8,DAB2,BBC3,NR1D1,ARHGEF40,HDAC1,PREX2,URI1,FZD5,ULK4,SEZ6,GPR137C,MYO9B,PLCG2,MAPK3,MAPK7,SYNGAP1,LEMD3,YJU2,DIPK2A,USP9X,SEMA5A,SEMA3A,NTRK3,RALGAPA2,PSEN1,TENM1,DLC1,PAK6,MTOR,USP7,ING4,CDH13,GUCY1A2,CSPG4,KDR,CSK,CHD5,TRIM67
GO:BP	cellular response to growth factor stimulus	GO:0071363	6.2095e-05	4.20694	673	384	35	21092	FLT3,APP,PTPN11,EXT2,LRP8,TGFB3,MAP3K7,SMAD3,CTNNB1,LEF1,OGT,ADAM9,RDX,PRKCB,FGF2,DAB2,PPP1R9B,HDAC1,URI1,SIN3A,PEG10,MAPK3,MAPK7,PPP2R5B,LEMD3,COL1A1,USP9X,CREBBP,LTBP2,NTRK3,BMPR2,CDKN1C,KDR,NBL1,RAMP2
GO:BP	regulation of cell population proliferation	GO:0042127	6.8955e-05	4.16144	1683	384	63	21092	FLT3,APP,FBXW4,MAP2K1,TBX3,GLI3,SOX2,FER,TGFB3,CSNK2A1,SMAD3,TSG101,RBM10,CTNNB1,LEF1,IRS1,RREB1,INHA,SF1,KMT2D,FAP,RARB,FGF2,DNAJB2,PRKG1,DAB2,NACA,RBM5,SMARCA2,NR1D1,PPP1R9B,CCND3,HDAC1,FZD5,RPS4X,MAPK3,POU3F2,KMT2A,SCRIB,KLF13,PHIP,FAM98B,CDK6,ZBTB7C,REST,SEMA5A,NTRK3,DLEC1,NDUFS4,BMPR2,TOX,TIMP1,TENM1,DLC1,HMGA1,CXADR,ING4,CDH13,CDKN1C,KDR,SQLE,CSK,CHD5
GO:BP	heart development	GO:0007507	7.2789e-05	4.13793	583	384	32	21092	PTPN11,MAP2K1,TBX3,GLI3,SMAD3,CTNNB1,NEBL,SUFU,HDAC9,ROBO2,RARB,FGF2,ADAM15,BICC1,NACA,CACNA1G,FZD2,MAPK3,DCHS1,DIPK2A,EOMES,PLEC,REST,PLXNA4,NTRK3,PSEN1,BMPR2,DLC1,CXADR,MTOR,KDR,RAMP2
GO:BP	anatomical structure formation involved in morphogenesis	GO:0048646	7.2822e-05	4.13774	1157	384	49	21092	PTPN11,EXT2,MAP2K1,TBX3,GLI3,SOX2,LRP8,SMAD3,ITGA7,CTNNB1,LEF1,ADAM9,NEBL,SUFU,HDAC9,JAK1,ROBO2,FAP,PRKCB,FGF2,ADAM15,FZD8,POGLUT1,COL12A1,HDAC1,FZD5,SDK1,COBL,FZD2,MAPK3,MAPK7,DCHS1,CLIC4,SCRIB,COL1A1,EOMES,PLEC,SEMA5A,C1GALT1,PSEN1,BMPR2,DLC1,MTHFD1L,SLC12A2,CDH13,CSPG4,KDR,RAMP2,NAA15
GO:BP	developmental growth	GO:0048589	7.4161e-05	4.12983	646	384	34	21092	APP,PTPN11,PRKN,GLI3,SOX2,SMAD3,CTNNB1,MEX3C,SLC4A10,KMT2D,RARB,FGF2,ADAM15,NACA,RASAL2,COBL,SIN3A,RIMS2,POU3F2,CLIC4,DIPK2A,USP9X,PLEC,EFNA5,SEMA5A,SEMA3A,PLXNA4,SPTBN4,BMPR2,CXADR,PAK6,MTOR,IMPACT,PKDCC
GO:BP	apoptotic process	GO:0006915	8.1711e-05	4.08772	1889	384	68	21092	FLT3,APP,PRKN,TBX3,GLI3,PPT1,LRP8,UBQLN1,TGFB3,MAP3K7,CSNK2A1,SMAD3,PPP2R1B,RBM10,TAF9B,DDX3X,CTNNB1,LEF1,OGT,ITPR1,ROBO2,FAP,PRKCB,RARB,HNRNPK,ASIC2,DAPK1,DAB2,NACA,RBM5,ACIN1,BBC3,FMN2,HDAC1,URI1,FZD5,SIN3A,CHD8,PEG10,CTSC,MAPK3,MAPK7,STXBP1,KMT2A,SYNGAP1,SCRIB,PHIP,ING3,DIPK2A,WNK3,REST,SEMA5A,SEMA3A,AHCYL1,PSEN1,SMNDC1,BMPR2,TIMP1,DLC1,TAX1BP1,UNC13B,PAK6,MTOR,ING4,KDR,RAMP2,RAD21,NAA15
GO:BP	negative regulation of DNA-templated transcription	GO:0045892	9.4117e-05	4.02633	1314	384	53	21092	PRKN,TBX3,GLI3,PHF6,SOX2,SMAD3,TSG101,RBM10,TAF9B,CTNNB1,LEF1,OGT,RREB1,SUFU,SF1,HDAC9,RARB,CUX1,HNRNPK,USP2,DAB2,NACA,SMARCA2,LARP7,NFIX,NR1D1,CCND3,HDAC1,URI1,LGR4,SIN3A,L3MBTL3,CHD8,SCAF8,ZNF10,RNF168,E2F6,EOMES,USP9X,CDK6,ZNF79,CREBBP,REST,CPEB3,ZFP90,PSEN1,HMGA1,ING4,TSHZ3,CHD4,CDKN1C,CHD5,IMPACT
GO:BP	regulation of protein localization	GO:0032880	9.4508e-05	4.02453	850	384	40	21092	PTPN11,PRKN,GLI3,NDUFAF2,TGFB3,SMAD3,TSG101,CTNNB1,IRS1,ADAM9,SUFU,RDX,DNAJB2,DAB2,NACA,CACNG2,BBC3,LARP7,NR1D1,PPP1R9B,CLTC,STX8,FZD5,CELSR2,SIN3A,PCSK1,AAK1,WNK3,REST,EFNA5,TTBK2,PSEN1,TENM1,GRIPAP1,UNC13B,SLC12A2,CSK,PKDCC,TRIM67,LRIG2
GO:BP	positive regulation of protein metabolic process	GO:0051247	9.5945e-05	4.01798	1504	384	58	21092	FLT3,APP,PTPN11,PRKAG2,PRKN,MAP2K1,LRP8,UBQLN1,TGFB3,MAP3K7,CSNK2A1,SMAD3,DDX3X,CTNNB1,OGT,ADAM9,INHA,RDX,ARRB1,CKS1B,FGF2,NRDC,CCNT2,DNAJB2,DAPK1,FZD8,DAB2,BBC3,CCND3,COA3,LARP1B,FZD5,RPS4X,CTSC,PLCG2,MAPK3,MAPK7,KMT2A,SPON1,DCUN1D1,DIPK2A,LRRTM3,WNK3,REST,EFNA5,CPEB3,NTRK3,PSEN1,BMPR2,TENM1,DLC1,GRIN2B,MTOR,CSPG4,KDR,CSK,IMPACT,TRIM67
GO:BP	negative regulation of nucleic acid-templated transcription	GO:1903507	9.8898e-05	4.00481	1316	384	53	21092	PRKN,TBX3,GLI3,PHF6,SOX2,SMAD3,TSG101,RBM10,TAF9B,CTNNB1,LEF1,OGT,RREB1,SUFU,SF1,HDAC9,RARB,CUX1,HNRNPK,USP2,DAB2,NACA,SMARCA2,LARP7,NFIX,NR1D1,CCND3,HDAC1,URI1,LGR4,SIN3A,L3MBTL3,CHD8,SCAF8,ZNF10,RNF168,E2F6,EOMES,USP9X,CDK6,ZNF79,CREBBP,REST,CPEB3,ZFP90,PSEN1,HMGA1,ING4,TSHZ3,CHD4,CDKN1C,CHD5,IMPACT
GO:BP	negative regulation of RNA biosynthetic process	GO:1902679	0.00010391	3.98335	1318	384	53	21092	PRKN,TBX3,GLI3,PHF6,SOX2,SMAD3,TSG101,RBM10,TAF9B,CTNNB1,LEF1,OGT,RREB1,SUFU,SF1,HDAC9,RARB,CUX1,HNRNPK,USP2,DAB2,NACA,SMARCA2,LARP7,NFIX,NR1D1,CCND3,HDAC1,URI1,LGR4,SIN3A,L3MBTL3,CHD8,SCAF8,ZNF10,RNF168,E2F6,EOMES,USP9X,CDK6,ZNF79,CREBBP,REST,CPEB3,ZFP90,PSEN1,HMGA1,ING4,TSHZ3,CHD4,CDKN1C,CHD5,IMPACT
GO:BP	glial cell differentiation	GO:0010001	0.00011326	3.94592	231	384	19	21092	APP,PTPN11,MAP2K1,GLI3,SOX2,CTNNB1,LEF1,FGF2,NR1D1,HDAC1,MAPK3,POU3F2,EOMES,CDK6,PLEC,NTRK3,PSEN1,MTOR,CSK
GO:BP	cell projection organization	GO:0030030	0.0001138	3.94385	1550	384	59	21092	APP,PTPN11,PRKN,MAP2K1,GLI3,DCTN1,FER,LRP8,TGFB3,CTNNB1,RREB1,MCF2,RDX,ROBO2,CUX1,PRKG1,DAB2,PPP1R9B,PREX2,ULK4,SEZ6,SDK1,COBL,KCTD17,CELSR2,SIN3A,IFT81,RIMS2,STXBP1,POU3F2,PPP2R5B,SYNGAP1,SCRIB,USP9X,EFNA5,SEMA5A,SEMA3A,PLXNA4,CPEB3,TTBK2,NTRK3,SPTBN4,PSEN1,BMPR2,TOX,TRIOBP,TENM1,GRIN2B,PAK6,MTOR,CDH13,CSPG4,NBL1,FGD6,IMPACT,CREB3L2,DNAH7,TRIM67,LRIG2
GO:BP	positive regulation of signaling	GO:0023056	0.00015938	3.79757	1722	384	63	21092	FLT3,APP,PTPN11,CYP46A1,PRKN,MAP2K1,SOX2,TGFB3,MAP3K7,CSNK2A1,SMAD3,PPP2R1B,DDX3X,GRM1,CTNNB1,LEF1,IRS1,ADAM9,INHA,ROBO2,KMT2D,ARRB1,PRKCB,FGF2,STAU1,FZD8,DAB2,CACNG2,BBC3,POGLUT1,FZD5,LGR4,GRIN2D,GPR137C,RIMS2,CTSC,PLCG2,MAPK3,STXBP1,PPP2R5B,AAK1,SCRIB,PHIP,COL1A1,USP9X,CREBBP,SEMA5A,SEMA3A,NTRK3,PSEN1,BMPR2,TENM1,GRIN2B,ING4,BMP2K,TSHZ3,CDH13,CDKN1C,GUCY1A2,CSPG4,KDR,CSK,CHD5
GO:BP	regulation of vesicle-mediated transport	GO:0060627	0.00017231	3.76368	543	384	30	21092	PRKN,MAP2K1,SYN1,PPT1,BCR,FER,TSG101,RDX,ARRB1,PRKCB,HNRNPK,DAB2,CACNA1G,DNAJC13,GIT1,SCYL2,RIMS2,PLCG2,MAPK3,STXBP1,AAK1,SCRIB,REST,CACNA1I,GRIPAP1,USP7,BMP2K,CDH13,CSK,PKDCC
GO:BP	negative regulation of macromolecule biosynthetic process	GO:0010558	0.00017305	3.76182	1530	384	58	21092	PRKN,TBX3,GLI3,PHF6,SOX2,SMAD3,TSG101,RBM10,TAF9B,DDX3X,CTNNB1,LEF1,OGT,RREB1,SUFU,SF1,HDAC9,RARB,CUX1,HNRNPK,USP2,DAPK1,DAB2,NACA,SMARCA2,LARP7,NFIX,NR1D1,CCND3,HDAC1,CLTC,URI1,LGR4,SIN3A,L3MBTL3,CHD8,SCAF8,ZNF10,RNF168,E2F6,EOMES,USP9X,CDK6,ZNF79,CREBBP,REST,CPEB3,ZFP90,PSEN1,BMPR2,HMGA1,ING4,TSHZ3,CHD4,CDKN1C,EIF4EBP1,CHD5,IMPACT
GO:BP	gliogenesis	GO:0042063	0.00018847	3.72476	315	384	22	21092	APP,PTPN11,MAP2K1,GLI3,SOX2,LRP8,CTNNB1,LEF1,FGF2,NR1D1,HDAC1,MAPK3,POU3F2,SCRIB,EOMES,CDK6,PLEC,NTRK3,PSEN1,MTOR,CSPG4,CSK
GO:BP	negative regulation of RNA metabolic process	GO:0051253	0.00022972	3.63881	1427	384	55	21092	PRKN,TBX3,GLI3,PHF6,SOX2,SMAD3,TSG101,RBM10,TAF9B,CTNNB1,LEF1,OGT,RREB1,SUFU,SF1,HDAC9,RARB,CUX1,HNRNPK,USP2,DAB2,NACA,ACIN1,SMARCA2,LARP7,NFIX,NR1D1,CCND3,HDAC1,URI1,LGR4,SIN3A,L3MBTL3,CHD8,SCAF8,ZNF10,TENT5A,RNF168,E2F6,EOMES,USP9X,CDK6,ZNF79,CREBBP,REST,CPEB3,ZFP90,PSEN1,HMGA1,ING4,TSHZ3,CHD4,CDKN1C,CHD5,IMPACT
GO:BP	organonitrogen compound metabolic process	GO:1901564	0.00024574	3.60952	6522	384	167	21092	FLT3,ETFA,APP,PTPN11,PRKAG2,EXT2,FBXW4,PRKN,MAP2K1,GLI3,SOX2,PPT1,BCR,FER,LRP8,UBQLN1,TGFB3,GALNT2,MAP3K7,CSNK2A1,SMAD3,PPP2R1B,TSG101,PAPSS2,TOP1,ALDH1L2,MANBA,DDX3X,CTNNB1,LEF1,NT5C3A,MEX3C,OGT,TCEAL4,ADAM9,PGM1,TTLL5,INHA,CDKAL1,SUFU,ATG16L1,RDX,HDAC9,ACACA,JAK1,KMT2D,FAP,TST,ARRB1,PRKCB,CKS1B,FGF2,NRDC,CCNT2,MTHFS,DNAJB2,ADAM15,USP2,CHST2,DAPK1,GLRX3,FZD8,PRKG1,DAB2,NACA,ADK,BBC3,CHRM3,KLHL3,…
GO:BP	embryonic morphogenesis	GO:0048598	0.00025716	3.58979	616	384	32	21092	EXT2,FBXW4,MAP2K1,TBX3,GLI3,SOX2,BCR,TGFB3,SMAD3,ITGA7,CTNNB1,LEF1,SUFU,RARB,FGF2,POGLUT1,COL12A1,HDAC1,FZD5,COBL,FZD2,MAPK3,MAPK7,SCRIB,EOMES,CREBBP,PSEN1,BMPR2,TRIOBP,DLC1,MTHFD1L,SP9
GO:BP	synapse organization	GO:0050808	0.00026092	3.5835	433	384	26	21092	APP,SYN1,DCTN1,LRP8,IL1RAPL2,CTNNB1,ROBO2,STAU1,ASIC2,CACNB3,CACNG2,FZD5,SEZ6,SDK1,SYNGAP1,LRRTM3,ADGRL3,REST,EFNA5,NTRK3,PSEN1,GRIPAP1,IGSF21,GRIN2B,UNC13B,CHD4
GO:BP	negative regulation of nucleobase-containing compound metabolic process	GO:0045934	0.0002936	3.53224	1554	384	58	21092	PRKN,TBX3,GLI3,PHF6,SOX2,SMAD3,TSG101,RBM10,TAF9B,CTNNB1,LEF1,OGT,RREB1,SUFU,SF1,HDAC9,RARB,CUX1,HNRNPK,USP2,DAB2,NACA,ACIN1,SMARCA2,LARP7,NFIX,NR1D1,CCND3,HDAC1,URI1,LGR4,SIN3A,L3MBTL3,GIT1,CHD8,KMT2A,SCAF8,ZNF10,TENT5A,RNF168,E2F6,EOMES,USP9X,CDK6,ZNF79,CREBBP,REST,CPEB3,ZFP90,PSEN1,BMPR2,HMGA1,ING4,TSHZ3,CHD4,CDKN1C,CHD5,IMPACT
GO:BP	negative regulation of cellular metabolic process	GO:0031324	0.00032352	3.4901	2248	384	75	21092	PRKAG2,PRKN,TBX3,GLI3,PHF6,SOX2,BCR,CSNK2A1,SMAD3,TSG101,RBM10,TAF9B,DDX3X,CTNNB1,LEF1,OGT,RREB1,INHA,SUFU,SF1,HDAC9,RARB,CUX1,HNRNPK,USP2,DAPK1,DAB2,NACA,ACIN1,SMARCA2,LARP7,NFIX,NR1D1,PPP1R9B,CCND3,HDAC1,ATP1A1,URI1,LGR4,SIN3A,L3MBTL3,GIT1,CHD8,KMT2A,SPON1,SCAF8,ZNF10,TENT5A,RNF168,E2F6,EOMES,USP9X,CDK6,ZNF79,PLEC,CREBBP,REST,CPEB3,NTRK3,ZFP90,PSEN1,BMPR2,TIMP1,HMGA1,MTOR,USP7,ING4,TSHZ3,CHD4,C…
GO:BP	anterograde trans-synaptic signaling	GO:0098916	0.00033238	3.47837	721	384	35	21092	APP,CYP46A1,PRKN,SYN1,PPT1,BCR,LRP8,GRM1,CTNNB1,SLC4A10,PRKCB,STAU1,ASIC2,CACNB3,CACNG2,CACNA1G,CHRM3,PPP1R9B,SEZ6,GRIN2D,GIT1,DLGAP2,RIMS2,STXBP1,KMT2A,SYNGAP1,SCRIB,INSYN2A,CACNA1E,CPEB3,PSEN1,GRIN2B,UNC13B,SLC12A2,TSHZ3
GO:BP	chemical synaptic transmission	GO:0007268	0.00033238	3.47837	721	384	35	21092	APP,CYP46A1,PRKN,SYN1,PPT1,BCR,LRP8,GRM1,CTNNB1,SLC4A10,PRKCB,STAU1,ASIC2,CACNB3,CACNG2,CACNA1G,CHRM3,PPP1R9B,SEZ6,GRIN2D,GIT1,DLGAP2,RIMS2,STXBP1,KMT2A,SYNGAP1,SCRIB,INSYN2A,CACNA1E,CPEB3,PSEN1,GRIN2B,UNC13B,SLC12A2,TSHZ3
GO:BP	positive regulation of cell communication	GO:0010647	0.00033457	3.47551	1718	384	62	21092	FLT3,APP,PTPN11,CYP46A1,PRKN,MAP2K1,SOX2,TGFB3,MAP3K7,CSNK2A1,SMAD3,PPP2R1B,DDX3X,GRM1,CTNNB1,LEF1,IRS1,ADAM9,INHA,ROBO2,KMT2D,ARRB1,PRKCB,FGF2,STAU1,FZD8,DAB2,CACNG2,BBC3,POGLUT1,FZD5,LGR4,GRIN2D,GPR137C,RIMS2,CTSC,PLCG2,MAPK3,STXBP1,PPP2R5B,AAK1,PHIP,COL1A1,USP9X,CREBBP,SEMA5A,SEMA3A,NTRK3,PSEN1,BMPR2,TENM1,GRIN2B,ING4,BMP2K,TSHZ3,CDH13,CDKN1C,GUCY1A2,CSPG4,KDR,CSK,CHD5
GO:BP	positive regulation of signal transduction	GO:0009967	0.00034941	3.45666	1523	384	57	21092	FLT3,APP,PTPN11,PRKN,MAP2K1,SOX2,TGFB3,MAP3K7,CSNK2A1,SMAD3,PPP2R1B,DDX3X,GRM1,CTNNB1,LEF1,IRS1,ADAM9,INHA,ROBO2,KMT2D,ARRB1,PRKCB,FGF2,FZD8,DAB2,BBC3,POGLUT1,FZD5,LGR4,GRIN2D,GPR137C,RIMS2,CTSC,PLCG2,MAPK3,PPP2R5B,AAK1,PHIP,COL1A1,USP9X,CREBBP,SEMA5A,SEMA3A,NTRK3,PSEN1,BMPR2,TENM1,GRIN2B,ING4,BMP2K,CDH13,CDKN1C,GUCY1A2,CSPG4,KDR,CSK,CHD5
GO:BP	cell fate specification	GO:0001708	0.00035334	3.4518	114	384	13	21092	TBX3,GLI3,SOX2,CTNNB1,PTCH2,SUFU,FGF2,HDAC1,POU3F2,EOMES,NTRK3,PSEN1,CHD4
GO:BP	canonical Wnt signaling pathway	GO:0060070	0.00037831	3.42215	301	384	21	21092	PRKN,GLI3,SOX2,SMAD3,DDX3X,CTNNB1,LEF1,FGF2,BICC1,FZD8,DAB2,HDAC1,FZD5,LGR4,CHD8,SCYL2,FZD2,COL1A1,SEMA5A,AMER2,PSEN1
GO:BP	trans-synaptic signaling	GO:0099537	0.00043239	3.36412	729	384	35	21092	APP,CYP46A1,PRKN,SYN1,PPT1,BCR,LRP8,GRM1,CTNNB1,SLC4A10,PRKCB,STAU1,ASIC2,CACNB3,CACNG2,CACNA1G,CHRM3,PPP1R9B,SEZ6,GRIN2D,GIT1,DLGAP2,RIMS2,STXBP1,KMT2A,SYNGAP1,SCRIB,INSYN2A,CACNA1E,CPEB3,PSEN1,GRIN2B,UNC13B,SLC12A2,TSHZ3
GO:BP	regulation of catalytic activity	GO:0050790	0.00047337	3.3248	2354	384	77	21092	FLT3,APP,PRKAG2,PRKN,MAP2K1,SOX2,PPT1,BCR,LRP8,MAP3K7,CSNK2A1,SMAD3,PPP2R1B,TSG101,DDX3X,CTNNB1,IRS1,ADAM9,MCF2,RDX,HDAC9,ARHGEF12,ARRB1,CKS1B,FGF2,NRDC,CCNT2,DAPK1,FZD8,PRKG1,DAB2,RCAN2,BBC3,WDR81,ARHGEF40,ELP4,PPP1R9B,CCND3,HDAC1,PREX2,URI1,RASAL2,FZD5,LGR4,GIT1,MYO9B,NOSIP,MAPK3,MAPK7,RFC3,PPP2R5B,SYNGAP1,PCSK1N,SCRIB,DCUN1D1,DIPK2A,PLEC,REST,EFNA5,PLXNA4,NTRK3,RALGAPA2,PSEN1,EEF1B2,BMPR2,TIMP…
GO:BP	Wnt signaling pathway	GO:0016055	0.00050608	3.29578	448	384	26	21092	APP,FBXW4,PRKN,GLI3,SOX2,CSNK2A1,SMAD3,DDX3X,CTNNB1,LEF1,FGF2,BICC1,FZD8,DAB2,HDAC1,FZD5,LGR4,CELSR2,CHD8,SCYL2,FZD2,PLCG2,COL1A1,SEMA5A,AMER2,PSEN1
GO:BP	negative regulation of biosynthetic process	GO:0009890	0.00050693	3.29505	1619	384	59	21092	PRKN,TBX3,GLI3,PHF6,SOX2,SMAD3,TSG101,RBM10,TAF9B,DDX3X,CTNNB1,LEF1,OGT,RREB1,SUFU,SF1,HDAC9,RARB,CUX1,HNRNPK,USP2,DAPK1,DAB2,NACA,SMARCA2,LARP7,NFIX,NR1D1,CCND3,HDAC1,ATP1A1,CLTC,URI1,LGR4,SIN3A,L3MBTL3,CHD8,SCAF8,ZNF10,RNF168,E2F6,EOMES,USP9X,CDK6,ZNF79,CREBBP,REST,CPEB3,ZFP90,PSEN1,BMPR2,HMGA1,ING4,TSHZ3,CHD4,CDKN1C,EIF4EBP1,CHD5,IMPACT
GO:BP	cell-cell signaling by wnt	GO:0198738	0.0005515	3.25845	450	384	26	21092	APP,FBXW4,PRKN,GLI3,SOX2,CSNK2A1,SMAD3,DDX3X,CTNNB1,LEF1,FGF2,BICC1,FZD8,DAB2,HDAC1,FZD5,LGR4,CELSR2,CHD8,SCYL2,FZD2,PLCG2,COL1A1,SEMA5A,AMER2,PSEN1
GO:BP	cell population proliferation	GO:0008283	0.00056538	3.24766	1988	384	68	21092	FLT3,APP,FBXW4,MAP2K1,TBX3,GLI3,SOX2,FER,TGFB3,CSNK2A1,SMAD3,TSG101,RBM10,CTNNB1,LEF1,IRS1,RREB1,INHA,SF1,KMT2D,FAP,RARB,CKS1B,FGF2,DNAJB2,PRKG1,DAB2,NACA,RBM5,SMARCA2,NR1D1,PPP1R9B,CCND3,HDAC1,FZD5,LGR4,RPS4X,MAPK3,DCHS1,POU3F2,KMT2A,SCRIB,KLF13,PHIP,DIPK2A,FAM98B,CDK6,ZBTB7C,REST,SEMA5A,NTRK3,DLEC1,PSEN1,NDUFS4,BMPR2,TOX,TIMP1,TENM1,DLC1,HMGA1,CXADR,ING4,CDH13,CDKN1C,KDR,SQLE,CSK,CHD5
GO:BP	regulation of cell differentiation	GO:0045595	0.00059301	3.22694	1587	384	58	21092	APP,PTPN11,MAP2K1,TBX3,GLI3,SOX2,LRP8,TGFB3,SMAD3,CTNNB1,PTCH2,LEF1,MEX3C,KIAA1109,RREB1,MCF2,INHA,SUFU,HDAC9,ROBO2,RARB,FGF2,CCNT2,CUX1,DDX17,DAB2,NACA,ACIN1,SMARCA2,NR1D1,ABCA5,HDAC1,SIN3A,TFE3,POU3F2,SYNGAP1,KLF13,TENT5A,COL1A1,CDK6,ZBTB7C,REST,EFNA5,SEMA5A,SEMA3A,PLXNA4,NTRK3,PSEN1,BMPR2,TOX,TRIOBP,MTOR,CHD4,KDR,NBL1,RAMP2,IMPACT,PKDCC
GO:BP	negative regulation of cellular biosynthetic process	GO:0031327	0.00061829	3.20881	1589	384	58	21092	PRKN,TBX3,GLI3,PHF6,SOX2,SMAD3,TSG101,RBM10,TAF9B,DDX3X,CTNNB1,LEF1,OGT,RREB1,SUFU,SF1,HDAC9,RARB,CUX1,HNRNPK,USP2,DAPK1,DAB2,NACA,SMARCA2,LARP7,NFIX,NR1D1,CCND3,HDAC1,ATP1A1,URI1,LGR4,SIN3A,L3MBTL3,CHD8,SCAF8,ZNF10,RNF168,E2F6,EOMES,USP9X,CDK6,ZNF79,CREBBP,REST,CPEB3,ZFP90,PSEN1,BMPR2,HMGA1,ING4,TSHZ3,CHD4,CDKN1C,EIF4EBP1,CHD5,IMPACT
GO:BP	adherens junction organization	GO:0034332	0.00067376	3.17149	51	384	9	21092	FER,CTNNB1,RDX,DCHS1,CDH10,PLEC,CDH24,CSK,RAMP2
GO:BP	cellular response to stimulus	GO:0051716	0.00072147	3.14178	7494	384	184	21092	FLT3,APP,PTPN11,PRKAG2,EXT2,CYP46A1,FBXW4,PRKN,MAP2K1,TBX3,GLI3,NDUFAF2,SOX2,BCR,FER,LRP8,UBQLN1,TGFB3,MAP3K7,CSNK2A1,SMAD3,PPP2R1B,TSG101,ITGA7,RAB33A,IL1RAPL2,TAF9B,DDX3X,GRM1,CTNNB1,PTCH2,LEF1,IRS1,OGT,ITPR1,ADAM9,MCF2,GPR34,INHA,SUFU,RDX,HDAC9,ACACA,JAK1,ROBO2,POLR2A,KMT2D,ARHGEF12,ARRB1,PRKCB,RARB,FGF2,DST,STAU1,DNAJB2,HNRNPK,DDX17,ADAM15,BICC1,ASIC2,USP2,HNRNPM,DAPK1,FZD8,PRKG1,CACNB3,DAB2,…
GO:BP	regulation of programmed cell death	GO:0043067	0.0007782	3.10891	1482	384	55	21092	FLT3,PRKN,TBX3,GLI3,PPT1,LRP8,UBQLN1,TGFB3,CSNK2A1,SMAD3,PPP2R1B,RBM10,TAF9B,DDX3X,CTNNB1,LEF1,OGT,FAP,RARB,FGF2,HNRNPK,ASIC2,DAPK1,DAB2,NACA,RBM5,ACIN1,BBC3,FMN2,HDAC1,URI1,SIN3A,CHD8,CTSC,PLCG2,MAPK7,STXBP1,SYNGAP1,SCRIB,PHIP,ING3,DIPK2A,WNK3,REST,SEMA5A,PSEN1,TIMP1,DLC1,TAX1BP1,UNC13B,MTOR,ING4,KDR,RAMP2,NAA15
GO:BP	regulation of cytoplasmic transport	GO:1903649	0.00088517	3.05297	27	384	7	21092	PRKN,MAP2K1,RDX,DAB2,DNAJC13,MAPK3,USP7
GO:BP	synaptic signaling	GO:0099536	0.00092729	3.03278	753	384	35	21092	APP,CYP46A1,PRKN,SYN1,PPT1,BCR,LRP8,GRM1,CTNNB1,SLC4A10,PRKCB,STAU1,ASIC2,CACNB3,CACNG2,CACNA1G,CHRM3,PPP1R9B,SEZ6,GRIN2D,GIT1,DLGAP2,RIMS2,STXBP1,KMT2A,SYNGAP1,SCRIB,INSYN2A,CACNA1E,CPEB3,PSEN1,GRIN2B,UNC13B,SLC12A2,TSHZ3
GO:BP	regulation of protein metabolic process	GO:0051246	0.00094562	3.02428	2567	384	81	21092	FLT3,APP,PTPN11,PRKAG2,PRKN,MAP2K1,SOX2,FER,LRP8,UBQLN1,TGFB3,MAP3K7,CSNK2A1,SMAD3,TSG101,DDX3X,CTNNB1,OGT,ADAM9,INHA,SUFU,RDX,ARRB1,CKS1B,FGF2,NRDC,CCNT2,DNAJB2,DAPK1,FZD8,DAB2,BBC3,ELP4,PPP1R9B,CCND3,FMN2,COA3,HDAC1,RASAL2,LARP1B,FZD5,SIN3A,RPS4X,CTSC,PLCG2,MAPK3,MAPK7,KMT2A,SPON1,PPP2R5B,PCSK1N,PHIP,DCUN1D1,DIPK2A,LRRTM3,USP9X,WNK3,PLEC,REST,EFNA5,CPEB3,NTRK3,SPTBN4,PSEN1,NDUFS4,BMPR2,TIMP1,TE…
GO:BP	tube development	GO:0035295	0.0010251	2.98924	1076	384	44	21092	MAP2K1,TBX3,GLI3,TGFB3,SMAD3,CTNNB1,LEF1,SUFU,HDAC9,JAK1,ROBO2,FAP,PRKCB,RARB,FGF2,ADAM15,FZD8,KLHL3,FZD5,COBL,LGR4,CHD8,FZD2,MAPK3,MAPK7,DCHS1,CLIC4,SCRIB,HECA,MAN1A2,SEMA5A,C1GALT1,PLXNA4,PSEN1,BMPR2,DLC1,MTHFD1L,SLC12A2,CDH13,CSPG4,KDR,RAMP2,NAA15,PKDCC
GO:BP	cellular response to organic substance	GO:0071310	0.00111482	2.9528	2405	384	77	21092	FLT3,APP,PTPN11,EXT2,PRKN,NDUFAF2,BCR,FER,LRP8,TGFB3,MAP3K7,SMAD3,IL1RAPL2,CTNNB1,LEF1,IRS1,OGT,ADAM9,MCF2,RDX,HDAC9,ACACA,JAK1,ROBO2,KMT2D,PRKCB,RARB,FGF2,DDX17,ADAM15,DAPK1,DAB2,BBC3,CHRM3,NR1D1,PPP1R9B,CCND3,HDAC1,ATP1A1,URI1,STX8,LGR4,SIN3A,GIT1,PEG10,DIAPH1,PLCG2,MAPK3,MAPK7,STXBP1,POU3F2,PPP2R5B,LEMD3,PHIP,UBE2W,COL1A1,USP9X,CREBBP,LTBP2,REST,EFNA5,CPEB3,NTRK3,AHCYL1,PSEN1,BMPR2,UNC13B,MTOR…
GO:BP	sensory organ development	GO:0007423	0.00121491	2.91546	595	384	30	21092	PTPN11,TBX3,GLI3,SOX2,BCR,TGFB3,SMAD3,CTNNB1,LEF1,TTLL5,ZNF513,RARB,FGF2,RAB18,FAT1,HDAC1,FZD5,SDK1,ATP2B2,FZD2,MAPK3,DCHS1,CLIC4,SCRIB,NHS,NTRK3,PSEN1,BMPR2,TRIOBP,KDR
GO:BP	intracellular signal transduction	GO:0035556	0.00123013	2.91005	2627	384	82	21092	FLT3,APP,PTPN11,PRKAG2,PRKN,MAP2K1,SOX2,BCR,FER,UBQLN1,TGFB3,MAP3K7,SMAD3,RAB33A,TAF9B,DDX3X,GRM1,CTNNB1,IRS1,OGT,ITPR1,ADAM9,MCF2,RDX,JAK1,ARHGEF12,ARRB1,PRKCB,FGF2,HNRNPK,USP2,DAPK1,FZD8,PRKG1,DAB2,RCAN2,BBC3,RAB18,CHRM3,NR1D1,ARHGEF40,PPP1R9B,FMN2,HDAC1,PREX2,URI1,FZD5,ULK4,SEZ6,GRIN2D,GPR137C,MYO9B,PLCG2,MAPK3,MAPK7,DCHS1,SYNGAP1,LEMD3,YJU2,DIPK2A,USP9X,WNK3,SEMA5A,SEMA3A,NTRK3,RALGAPA2,PSEN1…
GO:BP	regulation of plasma membrane bounded cell projection organization	GO:0120035	0.00155962	2.80698	635	384	31	21092	MAP2K1,FER,LRP8,TGFB3,RREB1,MCF2,RDX,ROBO2,CUX1,DAB2,ULK4,SEZ6,COBL,KCTD17,POU3F2,PPP2R5B,SYNGAP1,EFNA5,SEMA5A,SEMA3A,PLXNA4,NTRK3,PSEN1,BMPR2,TOX,TENM1,GRIN2B,MTOR,CREB3L2,TRIM67,LRIG2
GO:BP	ossification	GO:0001503	0.00158237	2.80069	415	384	24	21092	PTPN11,EXT2,ANKH,GLI3,SOX2,TGFB3,SMAD3,CTNNB1,LEF1,SUFU,FGF2,CLTC,DNAJC13,LGR4,GIT1,MAPK3,DCHS1,TENT5A,COL1A1,CDK6,REST,BMPR2,BMP2K,PKDCC
GO:BP	regulation of cell death	GO:0010941	0.00163588	2.78625	1637	384	58	21092	FLT3,PRKN,TBX3,GLI3,PPT1,LRP8,UBQLN1,TGFB3,CSNK2A1,SMAD3,PPP2R1B,RBM10,TAF9B,DDX3X,CTNNB1,LEF1,OGT,FAP,RARB,FGF2,HNRNPK,ASIC2,DAPK1,DAB2,NACA,RBM5,ACIN1,BBC3,FMN2,HDAC1,URI1,SIN3A,CHD8,CTSC,PLCG2,MAPK7,STXBP1,SYNGAP1,SCRIB,PHIP,ING3,DIPK2A,WNK3,REST,SEMA5A,NTRK3,PSEN1,TIMP1,DLC1,TAX1BP1,GRIN2B,UNC13B,MTOR,ING4,KDR,RAMP2,IMPACT,NAA15
GO:BP	cell part morphogenesis	GO:0032990	0.00170671	2.76784	671	384	32	21092	APP,PTPN11,PRKN,MAP2K1,GLI3,LRP8,CTNNB1,RREB1,MCF2,ROBO2,CUX1,PREX2,COBL,CELSR2,SIN3A,RIMS2,STXBP1,POU3F2,SYNGAP1,USP9X,PLEC,EFNA5,SEMA5A,SEMA3A,PLXNA4,SPTBN4,PSEN1,BMPR2,NUBPL,PAK6,NBL1,IMPACT
GO:BP	regulation of growth	GO:0040008	0.00170671	2.76784	671	384	32	21092	APP,PRKN,PPT1,CSNK2A1,SMAD3,TSG101,TAF9B,DDX3X,PTCH2,KIAA1109,FGF2,DNAJB2,ADAM15,DAB2,NACA,BBC3,SMARCA2,PPP1R9B,URI1,SIN3A,RIMS2,POU3F2,ING3,EFNA5,SEMA5A,SEMA3A,PLXNA4,SPTBN4,BMPR2,CXADR,MTOR,ING4
GO:BP	negative regulation of nitrogen compound metabolic process	GO:0051172	0.00181366	2.74144	2392	384	76	21092	APP,PRKAG2,PRKN,TBX3,GLI3,PHF6,SOX2,CSNK2A1,SMAD3,TSG101,RBM10,TAF9B,DDX3X,CTNNB1,LEF1,OGT,RREB1,SUFU,SF1,HDAC9,ARRB1,RARB,CUX1,DNAJB2,HNRNPK,USP2,DAPK1,DAB2,NACA,ACIN1,SMARCA2,LARP7,NFIX,NR1D1,PPP1R9B,CCND3,FMN2,HDAC1,CLTC,URI1,LGR4,SIN3A,L3MBTL3,GIT1,CHD8,KMT2A,SPON1,PCSK1N,SCAF8,ZNF10,TENT5A,RNF168,E2F6,EOMES,USP9X,CDK6,ZNF79,PLEC,CREBBP,REST,CPEB3,NTRK3,ZFP90,PSEN1,BMPR2,TIMP1,HMGA1,USP7,ING4…
GO:BP	homeostatic process	GO:0042592	0.00186543	2.72922	1684	384	59	21092	FLT3,APP,PTPN11,EXT2,ANKH,PRKN,DCTN1,NDUFAF2,PPT1,BCR,DDX3X,GRM1,CTNNB1,MEX3C,IRS1,OGT,ITPR1,INHA,SLC4A10,HDAC9,ACACA,PRKCB,FGF2,NRDC,STAU1,DNAJB2,GLRX3,ACIN1,BBC3,KLHL3,NR1D1,ABCA5,ATP1A1,LGR4,KCTD17,SIN3A,L3MBTL3,GIT1,TFE3,DIAPH1,ATP2B2,PLCG2,MAPK3,KMT2A,CLIC4,ALMS1,KLF13,CDK6,WNK3,PLEC,CREBBP,EFNA5,SLC22A17,PSEN1,CXADR,UNC13B,SLC12A2,KDR,CSK
GO:BP	regulation of anatomical structure morphogenesis	GO:0022603	0.00195663	2.70849	919	384	39	21092	PRKN,MAP2K1,BCR,LRP8,ITGA7,CTNNB1,RREB1,MCF2,RDX,JAK1,ROBO2,PRKCB,FGF2,CUX1,DAB2,POGLUT1,LGR4,CELSR2,BTBD7,DIAPH1,RIMS2,FZD2,MAPK7,POU3F2,SYNGAP1,PHIP,TMEM135,EFNA5,SEMA5A,SEMA3A,PLXNA4,PSEN1,BMPR2,TRIOBP,DLC1,SLC12A2,KDR,RAMP2,FGD6
GO:BP	positive regulation of protein serine/threonine kinase activity	GO:0071902	0.00202029	2.69459	226	384	17	21092	FLT3,MAP2K1,MAP3K7,DDX3X,ADAM9,CKS1B,FGF2,CCNT2,FZD8,CCND3,FZD5,DIPK2A,NTRK3,PSEN1,BMPR2,TENM1,CSK
GO:BP	positive regulation of developmental process	GO:0051094	0.00226908	2.64415	1337	384	50	21092	PRKN,MAP2K1,GLI3,SOX2,LRP8,TGFB3,SMAD3,CTNNB1,PTCH2,LEF1,OGT,RREB1,ADAM9,JAK1,ROBO2,PRKCB,FGF2,CUX1,ASIC2,DAB2,NACA,ACIN1,SMARCA2,HDAC1,COBL,LGR4,SIN3A,TFE3,RIMS2,POU3F2,TENT5A,LRRTM3,COL1A1,ZBTB7C,REST,EFNA5,SEMA5A,PLXNA4,CPEB3,SPTBN4,PSEN1,BMPR2,TOX,TRIOBP,MTOR,KDR,NBL1,RAMP2,IMPACT,PKDCC
GO:BP	regulation of membrane potential	GO:0042391	0.0023142	2.6356	424	384	24	21092	APP,PRKN,SCN1A,GRM1,ASIC2,CACNB3,CACNG2,CACNA1G,KCNH5,KCNH7,ATP1A1,SEZ6,GRIN2D,RIMS2,KMT2A,INSYN2A,KCNK10,CACNA1I,PSEN1,CXADR,GRIN2B,UNC13B,MTOR,KDR
GO:BP	response to hormone	GO:0009725	0.00253128	2.59666	857	384	37	21092	FLT3,PTPN11,GLI3,FER,TGFB3,IRS1,OGT,ADAM9,RDX,HDAC9,ACACA,JAK1,ROBO2,KMT2D,PRKCB,RARB,DDX17,DAB2,NR1D1,PPP1R9B,CCND3,HDAC1,ATP1A1,URI1,LGR4,PCSK1,PHIP,COL1A1,REST,EFNA5,NTRK3,AHCYL1,TIMP1,MTOR,CSK,RAMP2,ABHD2
GO:BP	regulation of cell projection organization	GO:0031344	0.00263492	2.57923	651	384	31	21092	MAP2K1,FER,LRP8,TGFB3,RREB1,MCF2,RDX,ROBO2,CUX1,DAB2,ULK4,SEZ6,COBL,KCTD17,POU3F2,PPP2R5B,SYNGAP1,EFNA5,SEMA5A,SEMA3A,PLXNA4,NTRK3,PSEN1,BMPR2,TOX,TENM1,GRIN2B,MTOR,CREB3L2,TRIM67,LRIG2
GO:BP	localization	GO:0051179	0.00271156	2.56678	5540	384	143	21092	APP,PTPN11,PRKAG2,EXT2,CYP46A1,ANKH,PRKN,MAP2K1,TBX3,GLI3,SYN1,DCTN1,NDUFAF2,PPT1,BCR,FER,LRP8,UBQLN1,TGFB3,SCN1A,SMAD3,TSG101,ATP6V1G2,DDX3X,GRM1,CTNNB1,KIAA1109,IRS1,ITPR1,ADAM9,INHA,SUFU,SLC4A10,ATG16L1,RDX,JAK1,COG4,TST,ARRB1,PRKCB,FGF2,DST,CUX1,DNAJB2,HNRNPK,ASIC2,DAPK1,CKAP5,CACNB3,DAB2,NACA,CACNG2,BBC3,CACNA1G,RAB18,CHRM3,KLHL3,LARP7,WDR81,SLC16A6,NR1D1,USP20,KCNH5,PPP1R9B,ABCA5,KCNH7,FMN2…
GO:BP	regulation of cell growth	GO:0001558	0.0028442	2.54604	429	384	24	21092	PRKN,PPT1,CSNK2A1,SMAD3,TSG101,TAF9B,DDX3X,PTCH2,KIAA1109,DNAJB2,ADAM15,DAB2,SMARCA2,PPP1R9B,URI1,SIN3A,RIMS2,EFNA5,SEMA5A,SEMA3A,PLXNA4,BMPR2,MTOR,ING4
GO:BP	signal transduction	GO:0007165	0.00286186	2.54335	5993	384	152	21092	FLT3,APP,PTPN11,PRKAG2,EXT2,FBXW4,PRKN,MAP2K1,GLI3,SOX2,BCR,FER,LRP8,UBQLN1,TGFB3,MAP3K7,CSNK2A1,SMAD3,PPP2R1B,TSG101,ITGA7,RAB33A,IL1RAPL2,TAF9B,DDX3X,GRM1,CTNNB1,PTCH2,LEF1,IRS1,OGT,ITPR1,ADAM9,MCF2,GPR34,INHA,SUFU,RDX,JAK1,ROBO2,KMT2D,ARHGEF12,ARRB1,PRKCB,RARB,FGF2,DST,HNRNPK,DDX17,ADAM15,BICC1,ASIC2,USP2,DAPK1,FZD8,PRKG1,CACNB3,DAB2,RCAN2,CACNG2,BBC3,RAB18,CHRM3,NR1D1,USP20,ARHGEF40,POGLUT1,P…
GO:BP	response to chemical	GO:0042221	0.00297014	2.52722	4383	384	119	21092	FLT3,APP,PTPN11,EXT2,CYP46A1,ANKH,PRKN,MAP2K1,GLI3,NDUFAF2,SOX2,BCR,FER,LRP8,UBQLN1,TGFB3,MAP3K7,SMAD3,TOP1,IL1RAPL2,DDX3X,CTNNB1,LEF1,IRS1,OGT,ADAM9,MCF2,RDX,HDAC9,ACACA,JAK1,ROBO2,POLR2A,KMT2D,PRKCB,RARB,FGF2,STAU1,DNAJB2,DDX17,ADAM15,DAPK1,DAB2,CACNG2,BBC3,CACNA1G,CHRM3,NR1D1,STT3B,PPP1R9B,CCND3,FMN2,HDAC1,ATP1A1,URI1,RASAL2,STX8,FZD5,SDK1,YTHDC2,LGR4,SIN3A,PCSK1,RPS4X,GIT1,PEG10,DIAPH1,CTSC,P…
GO:BP	regulation of phosphorylation	GO:0042325	0.00320727	2.49386	1237	384	47	21092	FLT3,APP,PTPN11,PRKAG2,PRKN,MAP2K1,FER,LRP8,TGFB3,MAP3K7,TSG101,DDX3X,IRS1,OGT,ADAM9,INHA,ARRB1,CKS1B,FGF2,CCNT2,FZD8,DAB2,WDR81,PPP1R9B,CCND3,FZD5,GIT1,PLCG2,MAPK3,PPP2R5B,PHIP,DIPK2A,WNK3,PLEC,EFNA5,NTRK3,SPTBN4,PSEN1,NDUFS4,BMPR2,TENM1,MTOR,CDKN1C,CSPG4,KDR,CSK,IMPACT
GO:BP	enzyme-linked receptor protein signaling pathway	GO:0007167	0.00335288	2.47458	976	384	40	21092	FLT3,PTPN11,FER,TGFB3,MAP3K7,SMAD3,TSG101,CTNNB1,LEF1,IRS1,OGT,ADAM9,INHA,JAK1,PRKCB,FGF2,DAB2,CCND3,HDAC1,SIN3A,GIT1,PEG10,MAPK3,PPP2R5B,LEMD3,PHIP,COL1A1,USP9X,CREBBP,LTBP2,EFNA5,NTRK3,PSEN1,BMPR2,CDH13,CDKN1C,CSPG4,KDR,NBL1,LRIG2
GO:BP	cellular response to chemical stimulus	GO:0070887	0.0033612	2.47351	3049	384	90	21092	FLT3,APP,PTPN11,EXT2,CYP46A1,PRKN,NDUFAF2,BCR,FER,LRP8,UBQLN1,TGFB3,MAP3K7,SMAD3,IL1RAPL2,DDX3X,CTNNB1,LEF1,IRS1,OGT,ADAM9,MCF2,RDX,HDAC9,ACACA,JAK1,ROBO2,POLR2A,KMT2D,PRKCB,RARB,FGF2,STAU1,DDX17,ADAM15,DAPK1,DAB2,BBC3,CHRM3,NR1D1,PPP1R9B,CCND3,FMN2,HDAC1,ATP1A1,URI1,STX8,LGR4,SIN3A,GIT1,PEG10,DIAPH1,PLCG2,MAPK3,MAPK7,STXBP1,POU3F2,PPP2R5B,CLIC4,LEMD3,PHIP,UBE2W,COL1A1,USP9X,WNK3,PLEC,CREBBP,LTBP…
GO:BP	cellular process	GO:0009987	0.00363747	2.4392	19221	384	373	21092	FLT3,ETFA,APP,PTPN11,PRKAG2,EXT2,CYP46A1,FBXW4,ANKH,PRKN,MAP2K1,TBX3,GLI3,SYN1,DCTN1,PHF6,NDUFAF2,SOX2,PPT1,BCR,FER,LRP8,UBQLN1,TGFB3,GALNT2,SCN1A,MAP3K7,CSNK2A1,SMAD3,PPP2R1B,TSG101,PAPSS2,TOP1,ITGA7,ATP6V1G2,RBM10,RAB33A,IL1RAPL2,TAF9B,ALDH1L2,MANBA,DDX3X,GRM1,CTNNB1,PTCH2,LEF1,NT5C3A,MEX3C,KIAA1109,IRS1,OGT,POU6F2,ITPR1,RREB1,TCEAL4,PIN4,ADAM9,MCF2,GPR34,PGM1,TTLL5,INHA,NEBL,CDKAL1,SUFU,CFAP25…
GO:BP	regulation of protein phosphorylation	GO:0001932	0.00403233	2.39444	1095	384	43	21092	FLT3,APP,PTPN11,PRKAG2,PRKN,MAP2K1,FER,LRP8,TGFB3,MAP3K7,TSG101,DDX3X,ADAM9,INHA,ARRB1,CKS1B,FGF2,CCNT2,FZD8,DAB2,PPP1R9B,CCND3,FZD5,PLCG2,MAPK3,PPP2R5B,PHIP,DIPK2A,WNK3,PLEC,EFNA5,NTRK3,SPTBN4,PSEN1,NDUFS4,BMPR2,TENM1,MTOR,CDKN1C,CSPG4,KDR,CSK,IMPACT
GO:BP	embryo development	GO:0009790	0.00424859	2.37176	1135	384	44	21092	EXT2,FBXW4,MAP2K1,TBX3,GLI3,PHF6,SOX2,BCR,TGFB3,SMAD3,TOP1,ITGA7,CTNNB1,LEF1,SUFU,RARB,FGF2,POGLUT1,COL12A1,HDAC1,FZD5,COBL,SIN3A,CHD8,FZD2,MAPK3,MAPK7,DCHS1,KMT2A,SCRIB,COL1A1,EOMES,CREBBP,PLXNA4,CMIP,DOP1B,PSEN1,BMPR2,TRIOBP,DLC1,MTHFD1L,SP9,KDR,PKDCC
GO:BP	astrocyte differentiation	GO:0048708	0.00460491	2.33678	81	384	10	21092	APP,PTPN11,MAP2K1,NR1D1,MAPK3,POU3F2,EOMES,CDK6,NTRK3,PSEN1
GO:BP	regulation of apoptotic process	GO:0042981	0.00494189	2.30611	1453	384	52	21092	FLT3,PRKN,TBX3,GLI3,PPT1,LRP8,UBQLN1,TGFB3,CSNK2A1,SMAD3,PPP2R1B,RBM10,TAF9B,DDX3X,CTNNB1,LEF1,FAP,RARB,HNRNPK,ASIC2,DAPK1,DAB2,NACA,RBM5,ACIN1,BBC3,FMN2,HDAC1,URI1,SIN3A,CHD8,CTSC,MAPK7,STXBP1,SYNGAP1,SCRIB,PHIP,ING3,DIPK2A,WNK3,REST,SEMA5A,PSEN1,TIMP1,DLC1,TAX1BP1,UNC13B,MTOR,ING4,KDR,RAMP2,NAA15
GO:BP	regulation of Wnt signaling pathway	GO:0030111	0.00527049	2.27815	325	384	20	21092	APP,PRKN,GLI3,SOX2,CSNK2A1,SMAD3,DDX3X,CTNNB1,LEF1,FGF2,BICC1,DAB2,HDAC1,LGR4,CHD8,SCYL2,COL1A1,SEMA5A,AMER2,PSEN1
GO:BP	regulation of cell migration	GO:0030334	0.0055946	2.25223	923	384	38	21092	APP,BCR,FER,SMAD3,LEF1,OGT,RREB1,ADAM9,RDX,HDAC9,FGF2,ADAM15,CHST2,PRKG1,DAB2,HDAC1,ULK4,SIN3A,KIF2A,DIAPH1,PLCG2,MAPK3,CLIC4,COL1A1,SEMA5A,SEMA3A,PLXNA4,TTBK2,NTRK3,BMPR2,TIMP1,DLC1,MTOR,CDH13,KDR,NBL1,ABHD2,LRIG2
GO:BP	regulation of cell development	GO:0060284	0.00618313	2.20879	512	384	26	21092	MAP2K1,GLI3,LRP8,CTNNB1,LEF1,RREB1,MCF2,HDAC9,ROBO2,FGF2,CUX1,DAB2,NACA,NR1D1,HDAC1,SYNGAP1,REST,EFNA5,SEMA5A,SEMA3A,PLXNA4,NTRK3,PSEN1,BMPR2,TRIOBP,MTOR
GO:BP	negative regulation of cell death	GO:0060548	0.00622245	2.20604	1001	384	40	21092	PRKN,TBX3,GLI3,PPT1,TGFB3,CSNK2A1,SMAD3,TAF9B,DDX3X,CTNNB1,LEF1,FGF2,HNRNPK,ASIC2,DAPK1,DAB2,NACA,FMN2,HDAC1,URI1,SIN3A,CHD8,PLCG2,MAPK7,STXBP1,SYNGAP1,PHIP,DIPK2A,WNK3,REST,SEMA5A,NTRK3,PSEN1,TIMP1,TAX1BP1,MTOR,KDR,RAMP2,IMPACT,NAA15
GO:BP	plasma membrane bounded cell projection morphogenesis	GO:0120039	0.00672221	2.17249	647	384	30	21092	APP,PTPN11,PRKN,MAP2K1,GLI3,LRP8,CTNNB1,RREB1,MCF2,ROBO2,CUX1,PREX2,COBL,CELSR2,SIN3A,RIMS2,STXBP1,POU3F2,SYNGAP1,USP9X,EFNA5,SEMA5A,SEMA3A,PLXNA4,SPTBN4,PSEN1,BMPR2,PAK6,NBL1,IMPACT
GO:BP	regulation of nervous system development	GO:0051960	0.00677201	2.16928	451	384	24	21092	MAP2K1,GLI3,LRP8,CTNNB1,LEF1,MCF2,ROBO2,FGF2,CUX1,ASIC2,NR1D1,HDAC1,CTSC,SYNGAP1,LRRTM3,REST,EFNA5,SEMA5A,SEMA3A,PLXNA4,NTRK3,PSEN1,BMPR2,MTOR
GO:BP	regulation of phosphate metabolic process	GO:0019220	0.00700447	2.15462	1391	384	50	21092	FLT3,APP,PTPN11,PRKAG2,PRKN,MAP2K1,FER,LRP8,TGFB3,MAP3K7,SMAD3,TSG101,DDX3X,IRS1,OGT,ADAM9,INHA,ARRB1,CKS1B,FGF2,CCNT2,FZD8,DAB2,WDR81,PPP1R9B,CCND3,URI1,FZD5,GIT1,PLCG2,MAPK3,PPP2R5B,PHIP,DIPK2A,WNK3,PLEC,EFNA5,NTRK3,SPTBN4,PSEN1,NDUFS4,BMPR2,TENM1,DLC1,MTOR,CDKN1C,CSPG4,KDR,CSK,IMPACT
GO:BP	modulation of chemical synaptic transmission	GO:0050804	0.00703399	2.1528	452	384	24	21092	APP,CYP46A1,PRKN,SYN1,BCR,LRP8,GRM1,SLC4A10,PRKCB,STAU1,CACNG2,PPP1R9B,GRIN2D,GIT1,DLGAP2,RIMS2,STXBP1,KMT2A,SYNGAP1,CPEB3,PSEN1,GRIN2B,SLC12A2,TSHZ3
GO:BP	regulation of phosphorus metabolic process	GO:0051174	0.00714672	2.14589	1392	384	50	21092	FLT3,APP,PTPN11,PRKAG2,PRKN,MAP2K1,FER,LRP8,TGFB3,MAP3K7,SMAD3,TSG101,DDX3X,IRS1,OGT,ADAM9,INHA,ARRB1,CKS1B,FGF2,CCNT2,FZD8,DAB2,WDR81,PPP1R9B,CCND3,URI1,FZD5,GIT1,PLCG2,MAPK3,PPP2R5B,PHIP,DIPK2A,WNK3,PLEC,EFNA5,NTRK3,SPTBN4,PSEN1,NDUFS4,BMPR2,TENM1,DLC1,MTOR,CDKN1C,CSPG4,KDR,CSK,IMPACT
GO:BP	regulation of trans-synaptic signaling	GO:0099177	0.0073052	2.13637	453	384	24	21092	APP,CYP46A1,PRKN,SYN1,BCR,LRP8,GRM1,SLC4A10,PRKCB,STAU1,CACNG2,PPP1R9B,GRIN2D,GIT1,DLGAP2,RIMS2,STXBP1,KMT2A,SYNGAP1,CPEB3,PSEN1,GRIN2B,SLC12A2,TSHZ3
GO:BP	developmental cell growth	GO:0048588	0.00736235	2.13298	222	384	16	21092	APP,PRKN,CTNNB1,MEX3C,KMT2D,COBL,SIN3A,RIMS2,USP9X,EFNA5,SEMA5A,SEMA3A,PLXNA4,BMPR2,PAK6,IMPACT
GO:BP	regulation of multicellular organismal development	GO:2000026	0.00743933	2.12847	1394	384	50	21092	PTPN11,ANKH,MAP2K1,TBX3,GLI3,LRP8,TGFB3,SMAD3,CTNNB1,PTCH2,LEF1,KIAA1109,MCF2,INHA,JAK1,ROBO2,PRKCB,RARB,FGF2,CUX1,ASIC2,ACIN1,SMARCA2,NR1D1,POGLUT1,HDAC1,TFE3,CTSC,MAPK7,SYNGAP1,KLF13,TENT5A,LRRTM3,CDK6,REST,EFNA5,SEMA5A,SEMA3A,PLXNA4,NTRK3,PSEN1,BMPR2,TOX,CXADR,MTOR,SLC12A2,BMP2K,KDR,RAMP2,PKDCC
GO:BP	positive regulation of protein modification process	GO:0031401	0.00772365	2.11218	1010	384	40	21092	FLT3,APP,PTPN11,PRKAG2,PRKN,MAP2K1,LRP8,UBQLN1,TGFB3,MAP3K7,DDX3X,CTNNB1,OGT,ADAM9,INHA,ARRB1,CKS1B,FGF2,CCNT2,DNAJB2,FZD8,DAB2,CCND3,FZD5,PLCG2,MAPK3,KMT2A,DCUN1D1,DIPK2A,WNK3,EFNA5,NTRK3,PSEN1,BMPR2,TENM1,DLC1,MTOR,CSPG4,KDR,CSK
GO:BP	transport	GO:0006810	0.00775682	2.11032	4755	384	125	21092	APP,PTPN11,PRKAG2,EXT2,ANKH,PRKN,MAP2K1,TBX3,GLI3,SYN1,DCTN1,NDUFAF2,PPT1,BCR,FER,LRP8,UBQLN1,TGFB3,SCN1A,SMAD3,TSG101,ATP6V1G2,GRM1,CTNNB1,KIAA1109,IRS1,ITPR1,ADAM9,INHA,SUFU,SLC4A10,ATG16L1,RDX,COG4,TST,ARRB1,PRKCB,FGF2,DST,CUX1,HNRNPK,ASIC2,DAPK1,CKAP5,CACNB3,DAB2,NACA,CACNG2,BBC3,CACNA1G,RAB18,CHRM3,KLHL3,WDR81,SLC16A6,NR1D1,USP20,KCNH5,ABCA5,KCNH7,FMN2,ATP1A1,CLTC,STX8,KCNQ5,FZD5,DNAJC13,DPC…
GO:BP	cell projection morphogenesis	GO:0048858	0.00783525	2.10595	652	384	30	21092	APP,PTPN11,PRKN,MAP2K1,GLI3,LRP8,CTNNB1,RREB1,MCF2,ROBO2,CUX1,PREX2,COBL,CELSR2,SIN3A,RIMS2,STXBP1,POU3F2,SYNGAP1,USP9X,EFNA5,SEMA5A,SEMA3A,PLXNA4,SPTBN4,PSEN1,BMPR2,PAK6,NBL1,IMPACT
GO:BP	phosphorus metabolic process	GO:0006793	0.00786523	2.10429	2841	384	84	21092	FLT3,APP,PTPN11,PRKAG2,ANKH,PRKN,MAP2K1,PPT1,BCR,FER,LRP8,TGFB3,MAP3K7,CSNK2A1,SMAD3,PPP2R1B,TSG101,PAPSS2,TOP1,ALDH1L2,DDX3X,NT5C3A,IRS1,OGT,ADAM9,PGM1,INHA,ACACA,JAK1,ARRB1,PRKCB,CKS1B,FGF2,CCNT2,DAPK1,FZD8,PRKG1,DAB2,ADK,KLHL3,NDUFA12,WDR81,PPP1R9B,FAR1,CCND3,URI1,FZD5,ULK4,PPIP5K2,GIT1,PNPLA6,SCYL2,PLCG2,MAPK3,MAPK7,PPP2R5B,AAK1,PHIP,DIPK2A,PLPPR1,CLK1,CDK6,WNK3,PLEC,EFNA5,TTBK2,NTRK3,SPTBN4,…
GO:BP	regulation of canonical Wnt signaling pathway	GO:0060828	0.00803046	2.09526	250	384	17	21092	PRKN,GLI3,SOX2,SMAD3,DDX3X,CTNNB1,FGF2,BICC1,DAB2,HDAC1,LGR4,CHD8,SCYL2,COL1A1,SEMA5A,AMER2,PSEN1
GO:BP	cellular localization	GO:0051641	0.00889168	2.05102	3580	384	100	21092	APP,PTPN11,CYP46A1,PRKN,MAP2K1,GLI3,SYN1,DCTN1,NDUFAF2,PPT1,BCR,FER,TGFB3,SCN1A,SMAD3,TSG101,DDX3X,CTNNB1,KIAA1109,IRS1,ITPR1,ADAM9,SUFU,ATG16L1,RDX,JAK1,COG4,ARRB1,PRKCB,FGF2,DST,DNAJB2,ASIC2,CACNB3,DAB2,NACA,CACNG2,BBC3,RAB18,LARP7,WDR81,NR1D1,PPP1R9B,FMN2,CLTC,STX8,FZD5,DNAJC13,DPCD,RELCH,CELSR2,SIN3A,IFT81,PCSK1,GIT1,DIAPH1,ZDHHC20,SCYL2,RIMS2,PLCG2,MAPK3,STXBP1,DCHS1,SYNGAP1,AAK1,ALMS1,NUP20…
GO:BP	epithelium development	GO:0060429	0.00917194	2.03754	1208	384	45	21092	MAP2K1,TBX3,GLI3,BCR,FER,SMAD3,TSG101,CTNNB1,PTCH2,LEF1,KIAA1109,RREB1,ADAM9,SUFU,RDX,ROBO2,TST,RARB,FGF2,DAB2,KLHL3,POGLUT1,FAT1,HDAC1,FZD5,COBL,LGR4,CELSR2,BTBD7,FZD2,DCHS1,POU3F2,CLIC4,SCRIB,CDK6,PLEC,C1GALT1,PLXNA4,PSEN1,BMPR2,TRIOBP,DLC1,MTHFD1L,MTOR,KDR
GO:BP	regulation of cell motility	GO:2000145	0.0103663	1.98438	985	384	39	21092	APP,BCR,FER,SMAD3,LEF1,OGT,RREB1,ADAM9,RDX,HDAC9,FGF2,ADAM15,CHST2,PRKG1,DAB2,HDAC1,ULK4,SIN3A,KIF2A,DIAPH1,PLCG2,MAPK3,CLIC4,COL1A1,CDK6,SEMA5A,SEMA3A,PLXNA4,TTBK2,NTRK3,BMPR2,TIMP1,DLC1,MTOR,CDH13,KDR,NBL1,ABHD2,LRIG2
GO:BP	cell junction assembly	GO:0034329	0.0103951	1.98317	431	384	23	21092	APP,BCR,FER,SMAD3,IL1RAPL2,CTNNB1,ROBO2,DST,ASIC2,THSD1,FZD5,SDK1,DCHS1,CDH10,LRRTM3,PLEC,CDH24,ADGRL3,EFNA5,NTRK3,DLC1,KDR,RAMP2
GO:BP	phosphate-containing compound metabolic process	GO:0006796	0.0104809	1.9796	2817	384	83	21092	FLT3,APP,PTPN11,PRKAG2,PRKN,MAP2K1,PPT1,BCR,FER,LRP8,TGFB3,MAP3K7,CSNK2A1,SMAD3,PPP2R1B,TSG101,PAPSS2,TOP1,ALDH1L2,DDX3X,NT5C3A,IRS1,OGT,ADAM9,PGM1,INHA,ACACA,JAK1,ARRB1,PRKCB,CKS1B,FGF2,CCNT2,DAPK1,FZD8,PRKG1,DAB2,ADK,KLHL3,NDUFA12,WDR81,PPP1R9B,FAR1,CCND3,URI1,FZD5,ULK4,PPIP5K2,GIT1,PNPLA6,SCYL2,PLCG2,MAPK3,MAPK7,PPP2R5B,AAK1,PHIP,DIPK2A,PLPPR1,CLK1,CDK6,WNK3,PLEC,EFNA5,TTBK2,NTRK3,SPTBN4,PSEN1…
GO:BP	protein catabolic process	GO:0030163	0.0104918	1.97915	1023	384	40	21092	FBXW4,PRKN,PPT1,UBQLN1,CSNK2A1,SMAD3,TSG101,MANBA,CTNNB1,OGT,ADAM9,SUFU,RDX,FAP,ARRB1,NRDC,DNAJB2,USP2,DAB2,KLHL3,WDR81,NR1D1,USP20,STT3B,FMN2,RSPRY1,KCTD17,CTSC,UBE2H,UBE2W,ABHD10,RNF168,USP9X,PSEN1,TIMP1,MTOR,SPOP,USP7,TRIM67,LRIG2
GO:BP	regulation of neurogenesis	GO:0050767	0.0105236	1.97783	370	384	21	21092	MAP2K1,GLI3,LRP8,CTNNB1,LEF1,MCF2,ROBO2,FGF2,CUX1,NR1D1,HDAC1,SYNGAP1,REST,EFNA5,SEMA5A,SEMA3A,PLXNA4,NTRK3,PSEN1,BMPR2,MTOR
GO:BP	positive regulation of molecular function	GO:0044093	0.0105577	1.97643	1573	384	54	21092	FLT3,APP,PRKAG2,PRKN,MAP2K1,BCR,FER,LRP8,MAP3K7,SMAD3,DDX3X,CTNNB1,IRS1,ADAM9,PRKCB,CKS1B,FGF2,CCNT2,DNAJB2,HNRNPK,DAPK1,FZD8,CACNB3,CACNG2,BBC3,CCND3,HDAC1,PPRC1,FZD5,LGR4,FZD2,PLCG2,MAPK3,RFC3,KMT2A,SPON1,PPP2R5B,SCRIB,DCUN1D1,DIPK2A,USP9X,WNK3,REST,EFNA5,NTRK3,RALGAPA2,PSEN1,BMPR2,TENM1,DLC1,GRIN2B,MTOR,KDR,CSK
GO:BP	regulation of cellular component biogenesis	GO:0044087	0.010937	1.9611	950	384	38	21092	APP,PTPN11,PRKN,DCTN1,FER,TGFB3,SMAD3,TSG101,IL1RAPL2,DDX3X,RDX,ROBO2,DNAJB2,ASIC2,CKAP5,BBC3,FZD5,COBL,KCTD17,SIN3A,GIT1,STMP1,PLCG2,STXBP1,PPP2R5B,ALMS1,LRRTM3,REST,EFNA5,NTRK3,SPTBN4,TRIOBP,TENM1,DLC1,UNC13B,MTOR,KDR,IMPACT
GO:BP	cellular response to hormone stimulus	GO:0032870	0.0109568	1.96032	595	384	28	21092	FLT3,PTPN11,FER,IRS1,OGT,RDX,HDAC9,ACACA,JAK1,ROBO2,KMT2D,PRKCB,RARB,DDX17,DAB2,NR1D1,CCND3,HDAC1,ATP1A1,URI1,LGR4,PHIP,REST,EFNA5,AHCYL1,CSK,RAMP2,ABHD2
GO:BP	cell morphogenesis involved in differentiation	GO:0000904	0.0109989	1.95865	733	384	32	21092	APP,PTPN11,MAP2K1,GLI3,FER,LRP8,CTNNB1,LEF1,RREB1,MCF2,ROBO2,CUX1,DAB2,FAT1,PREX2,COBL,CELSR2,SIN3A,STXBP1,POU3F2,SYNGAP1,CLIC4,SCRIB,USP9X,EFNA5,SEMA5A,SEMA3A,PLXNA4,SPTBN4,PSEN1,BMPR2,TRIOBP
GO:BP	cellular component morphogenesis	GO:0032989	0.01149	1.93968	770	384	33	21092	APP,PTPN11,PRKN,MAP2K1,GLI3,LRP8,CTNNB1,RREB1,MCF2,NEBL,ROBO2,CUX1,PREX2,COBL,CELSR2,SIN3A,RIMS2,STXBP1,POU3F2,SYNGAP1,USP9X,PLEC,EFNA5,SEMA5A,SEMA3A,PLXNA4,SPTBN4,PSEN1,BMPR2,NUBPL,PAK6,NBL1,IMPACT
GO:BP	cartilage development	GO:0051216	0.0116598	1.93331	204	384	15	21092	PTPN11,EXT2,FBXW4,GLI3,SMAD3,CTNNB1,MEX3C,RARB,FGF2,MAPK3,COL1A1,BMPR2,TIMP1,PKDCC,CREB3L2
GO:BP	tissue morphogenesis	GO:0048729	0.0116888	1.93223	631	384	29	21092	EXT2,TBX3,GLI3,SMAD3,CTNNB1,LEF1,RREB1,SUFU,ROBO2,FGF2,DAB2,KLHL3,FAT1,FZD5,COBL,LGR4,CELSR2,BTBD7,FZD2,DCHS1,CLIC4,SCRIB,EOMES,PSEN1,BMPR2,DLC1,MTHFD1L,MTOR,KDR
GO:BP	neuron projection morphogenesis	GO:0048812	0.0120491	1.91905	632	384	29	21092	APP,PTPN11,PRKN,MAP2K1,GLI3,LRP8,CTNNB1,MCF2,ROBO2,CUX1,PREX2,COBL,CELSR2,SIN3A,RIMS2,STXBP1,POU3F2,SYNGAP1,USP9X,EFNA5,SEMA5A,SEMA3A,PLXNA4,SPTBN4,PSEN1,BMPR2,PAK6,NBL1,IMPACT
GO:BP	regulation of locomotion	GO:0040012	0.0123384	1.90874	1030	384	40	21092	APP,BCR,FER,SMAD3,LEF1,OGT,RREB1,ADAM9,RDX,HDAC9,ROBO2,FGF2,ADAM15,CHST2,PRKG1,DAB2,HDAC1,ULK4,SIN3A,KIF2A,DIAPH1,PLCG2,MAPK3,CLIC4,COL1A1,CDK6,SEMA5A,SEMA3A,PLXNA4,TTBK2,NTRK3,BMPR2,TIMP1,DLC1,MTOR,CDH13,KDR,NBL1,ABHD2,LRIG2
GO:BP	macromolecule catabolic process	GO:0009057	0.0124035	1.90646	1380	384	49	21092	FBXW4,PRKN,PPT1,UBQLN1,CSNK2A1,SMAD3,TSG101,RBM10,MANBA,CTNNB1,OGT,ADAM9,SUFU,RDX,FAP,ARRB1,FGF2,NRDC,DNAJB2,USP2,HNRNPM,DAB2,KLHL3,WDR81,NR1D1,USP20,STT3B,FMN2,RSPRY1,KCTD17,FUCA1,CTSC,UBE2H,PYGM,EDC4,TENT5A,PNRC2,UBE2W,ABHD10,RNF168,USP9X,CPEB3,PSEN1,TIMP1,MTOR,SPOP,USP7,TRIM67,LRIG2
GO:BP	digestive tract development	GO:0048565	0.0128801	1.89008	133	384	12	21092	GLI3,TGFB3,SMAD3,CTNNB1,RARB,FZD5,COBL,LGR4,CHD8,DCHS1,C1GALT1,PKDCC
GO:BP	peptidyl-tyrosine phosphorylation	GO:0018108	0.0129421	1.888	375	384	21	21092	FLT3,APP,PTPN11,MAP2K1,BCR,FER,LRP8,TSG101,JAK1,PLCG2,MAPK3,PPP2R5B,CLK1,EFNA5,NTRK3,PSEN1,MTOR,CSPG4,KDR,CSK,PKDCC
GO:BP	negative regulation of multicellular organismal process	GO:0051241	0.0138368	1.85897	1035	384	40	21092	PTPN11,GLI3,BCR,TGFB3,SMAD3,CTNNB1,LEF1,OGT,MCF2,INHA,HDAC9,ROBO2,FAP,ARRB1,RARB,FGF2,NRDC,GLRX3,PRKG1,NR1D1,HDAC1,ATP1A1,LGR4,SIN3A,GIT1,TFE3,CTSC,SYNGAP1,CDK6,REST,SEMA5A,SEMA3A,NTRK3,SPTBN4,PSEN1,BMPR2,TIMP1,CXADR,SLC12A2,CSK
GO:BP	positive regulation of multicellular organismal process	GO:0051240	0.0140107	1.85354	1507	384	52	21092	APP,PTPN11,MAP2K1,GLI3,LRP8,TGFB3,MAP3K7,SMAD3,DDX3X,CTNNB1,LEF1,OGT,RREB1,INHA,JAK1,ROBO2,PRKCB,FGF2,CUX1,ASIC2,DAB2,ACIN1,CHRM3,SMARCA2,HDAC1,ATP1A1,FZD5,LGR4,SIN3A,STMP1,RIMS2,PLCG2,POU3F2,ALMS1,SCRIB,TENT5A,LRRTM3,COL1A1,REST,EFNA5,SEMA5A,PLXNA4,SPTBN4,PSEN1,BMPR2,TOX,UNC13B,MTOR,KDR,RAMP2,PKDCC,PANX1
GO:BP	peptidyl-tyrosine modification	GO:0018212	0.014043	1.85254	377	384	21	21092	FLT3,APP,PTPN11,MAP2K1,BCR,FER,LRP8,TSG101,JAK1,PLCG2,MAPK3,PPP2R5B,CLK1,EFNA5,NTRK3,PSEN1,MTOR,CSPG4,KDR,CSK,PKDCC
GO:BP	positive regulation of protein phosphorylation	GO:0001934	0.014508	1.83839	743	384	32	21092	FLT3,APP,PTPN11,PRKAG2,MAP2K1,LRP8,TGFB3,MAP3K7,DDX3X,ADAM9,INHA,ARRB1,CKS1B,FGF2,CCNT2,FZD8,DAB2,CCND3,FZD5,PLCG2,MAPK3,DIPK2A,WNK3,EFNA5,NTRK3,PSEN1,BMPR2,TENM1,MTOR,CSPG4,KDR,CSK
GO:BP	locomotion	GO:0040011	0.0147563	1.83102	1349	384	48	21092	APP,MAP2K1,GLI3,BCR,FER,SMAD3,LEF1,OGT,RREB1,ADAM9,RDX,HDAC9,ROBO2,FGF2,ADAM15,CHST2,PRKG1,DAB2,HDAC1,ULK4,SIN3A,KIF2A,DIAPH1,PLCG2,MAPK3,CLIC4,SCRIB,COL1A1,CDK6,PLEC,EFNA5,SEMA5A,SEMA3A,PLXNA4,TTBK2,NTRK3,PSEN1,BMPR2,TIMP1,DLC1,CXADR,MTOR,SLC12A2,CDH13,KDR,NBL1,ABHD2,LRIG2
GO:BP	locomotory behavior	GO:0007626	0.014762	1.83086	208	384	15	21092	APP,ANKH,PRKN,PPT1,SCN1A,GRM1,SLC4A10,USP2,PREX2,SEZ6,GRIN2D,GIT1,SPTBN4,PAK6,MTOR
GO:BP	early endosome to late endosome transport	GO:0045022	0.015157	1.81939	40	384	7	21092	MAP2K1,RDX,DAB2,WDR81,STX8,DNAJC13,MAPK3
GO:BP	response to wounding	GO:0009611	0.0153356	1.8143	572	384	27	21092	MAP2K1,GLI3,SOX2,TGFB3,SMAD3,PAPSS2,RREB1,FAP,FGF2,DST,PRKG1,NACA,PCSK1,GIT1,PLCG2,STXBP1,SCRIB,COL1A1,PLEC,NTRK3,TIMP1,MTOR,SLC12A2,KDR,ABHD2,CREB3L2,LRIG2
GO:BP	regulation of neuron projection development	GO:0010975	0.0168928	1.7723	444	384	23	21092	MAP2K1,LRP8,MCF2,ROBO2,CUX1,DAB2,ULK4,SEZ6,COBL,POU3F2,PPP2R5B,SYNGAP1,EFNA5,SEMA5A,SEMA3A,PLXNA4,NTRK3,PSEN1,BMPR2,TOX,CREB3L2,TRIM67,LRIG2
GO:BP	cell adhesion	GO:0007155	0.0181427	1.7413	1521	384	52	21092	APP,PTPN11,GLI3,SOX2,BCR,FER,SMAD3,ITGA7,CTNNB1,LEF1,RREB1,ADAM9,RDX,JAK1,ROBO2,FAP,DST,ADAM15,CHST2,PRKG1,DAB2,SMARCA2,COL12A1,FAT1,THSD1,SDK1,CELSR2,TFE3,MAPK7,STXBP1,DCHS1,SPON1,CDH10,SCRIB,PCDHGA4,COL1A1,CDK6,PCDH19,CDH24,ADGRL3,EFNA5,SEMA5A,PLXNA4,PSEN1,TRIOBP,TENM1,DLC1,IGSF21,CXADR,CDH13,KDR,CSK
GO:BP	regulation of protein serine/threonine kinase activity	GO:0071900	0.0193463	1.7134	385	384	21	21092	FLT3,PRKAG2,MAP2K1,MAP3K7,TSG101,DDX3X,ADAM9,CKS1B,FGF2,CCNT2,FZD8,DAB2,CCND3,FZD5,DIPK2A,NTRK3,PSEN1,BMPR2,TENM1,CDKN1C,CSK
GO:BP	negative regulation of programmed cell death	GO:0043069	0.019644	1.70677	900	384	36	21092	PRKN,TBX3,GLI3,PPT1,TGFB3,CSNK2A1,SMAD3,TAF9B,DDX3X,CTNNB1,LEF1,HNRNPK,ASIC2,DAPK1,DAB2,NACA,FMN2,HDAC1,URI1,SIN3A,CHD8,PLCG2,MAPK7,STXBP1,SYNGAP1,PHIP,DIPK2A,WNK3,SEMA5A,PSEN1,TIMP1,TAX1BP1,MTOR,KDR,RAMP2,NAA15
GO:BP	regulation of transmembrane transport	GO:0034762	0.0197078	1.70536	580	384	27	21092	APP,PTPN11,PRKAG2,UBQLN1,SCN1A,IRS1,PRKCB,ASIC2,DAPK1,CACNB3,CACNG2,CACNA1G,CHRM3,KCNH5,KCNH7,KCNQ5,GRIN2D,DIAPH1,PLCG2,CLIC4,WNK3,KCNK10,CACNA1E,CACNA1I,AHCYL1,PSEN1,GRIN2B
GO:BP	regulation of early endosome to late endosome transport	GO:2000641	0.0218896	1.65976	17	384	5	21092	MAP2K1,RDX,DAB2,DNAJC13,MAPK3
GO:BP	positive regulation of transferase activity	GO:0051347	0.0244366	1.61196	587	384	27	21092	FLT3,PRKAG2,MAP2K1,LRP8,MAP3K7,DDX3X,CTNNB1,IRS1,ADAM9,CKS1B,FGF2,CCNT2,FZD8,CCND3,FZD5,MAPK3,RFC3,DCUN1D1,DIPK2A,EFNA5,NTRK3,PSEN1,BMPR2,TENM1,MTOR,KDR,CSK
GO:BP	mesenchyme development	GO:0060485	0.0248372	1.6049	301	384	18	21092	TBX3,TGFB3,SMAD3,CTNNB1,LEF1,ROBO2,DDX17,ADAM15,DAB2,POGLUT1,MAPK3,DCHS1,COL1A1,EOMES,SEMA5A,SEMA3A,BMPR2,MTOR
GO:BP	vesicle-mediated transport between endosomal compartments	GO:0098927	0.0249965	1.60212	43	384	7	21092	MAP2K1,RDX,DAB2,WDR81,STX8,DNAJC13,MAPK3
GO:BP	positive regulation of cell differentiation	GO:0045597	0.0276037	1.55903	877	384	35	21092	MAP2K1,GLI3,SOX2,LRP8,TGFB3,SMAD3,CTNNB1,PTCH2,LEF1,RREB1,ROBO2,FGF2,CUX1,DAB2,ACIN1,SMARCA2,HDAC1,SIN3A,TFE3,TENT5A,COL1A1,ZBTB7C,REST,EFNA5,SEMA5A,PLXNA4,BMPR2,TOX,TRIOBP,MTOR,KDR,NBL1,RAMP2,IMPACT,PKDCC
GO:BP	embryonic organ development	GO:0048568	0.0278447	1.55526	458	384	23	21092	MAP2K1,TBX3,GLI3,BCR,TGFB3,SMAD3,CTNNB1,LEF1,SUFU,RARB,FZD5,COBL,FZD2,MAPK3,KMT2A,SCRIB,EOMES,PLXNA4,PSEN1,TRIOBP,MTHFD1L,KDR,PKDCC
GO:BP	morphogenesis of an epithelium	GO:0002009	0.0290229	1.53726	525	384	25	21092	TBX3,GLI3,SMAD3,CTNNB1,LEF1,RREB1,SUFU,FGF2,DAB2,KLHL3,FAT1,FZD5,COBL,LGR4,CELSR2,BTBD7,FZD2,DCHS1,CLIC4,SCRIB,PSEN1,DLC1,MTHFD1L,MTOR,KDR
GO:BP	digestive system development	GO:0055123	0.0290887	1.53628	144	384	12	21092	GLI3,TGFB3,SMAD3,CTNNB1,RARB,FZD5,COBL,LGR4,CHD8,DCHS1,C1GALT1,PKDCC
GO:BP	negative regulation of apoptotic process	GO:0043066	0.0303855	1.51733	881	384	35	21092	PRKN,TBX3,GLI3,PPT1,TGFB3,CSNK2A1,SMAD3,TAF9B,DDX3X,CTNNB1,LEF1,HNRNPK,ASIC2,DAPK1,DAB2,NACA,FMN2,HDAC1,URI1,SIN3A,CHD8,MAPK7,STXBP1,SYNGAP1,PHIP,DIPK2A,WNK3,SEMA5A,PSEN1,TIMP1,TAX1BP1,MTOR,KDR,RAMP2,NAA15
GO:BP	regulation of cell cycle	GO:0051726	0.0315425	1.5011	1111	384	41	21092	APP,PTPN11,TBX3,DCTN1,SOX2,BCR,CSNK2A1,TSG101,DDX3X,CTNNB1,LEF1,INHA,RDX,FAP,CKS1B,FGF2,CCNT2,USP2,SMARCA2,KCNH5,PPP1R9B,CCND3,CLTC,KLHL9,YTHDC2,SIN3A,GIT1,PLCG2,PPP2R5B,ALMS1,SCRIB,HECA,PHIP,ING3,LSM11,CDK6,TTC28,ING4,CDKN1C,EIF4EBP1,RAD21
GO:BP	regulation of ion transport	GO:0043269	0.0329032	1.48276	702	384	30	21092	APP,PRKN,UBQLN1,SCN1A,CTNNB1,ASIC2,DAPK1,CACNB3,CACNG2,CACNA1G,CHRM3,KCNH5,KCNH7,ATP1A1,KCNQ5,GRIN2D,DIAPH1,PLCG2,STXBP1,CLIC4,WNK3,KCNK10,CACNA1E,SPTBN4,CACNA1I,AHCYL1,PSEN1,NKAIN2,GRIN2B,SLC12A2
GO:BP	cellular macromolecule metabolic process	GO:0044260	0.0373036	1.42825	3234	384	90	21092	APP,PRKAG2,EXT2,FBXW4,PRKN,PPT1,UBQLN1,GALNT2,CSNK2A1,TSG101,TOP1,RBM10,MANBA,DDX3X,CTNNB1,LEF1,IRS1,OGT,TCEAL4,INHA,CDKAL1,SUFU,ATG16L1,KMT2D,ARRB1,FGF2,DNAJB2,USP2,HNRNPM,DAPK1,DAB2,NACA,SMARCA2,KLHL3,LARP7,WDR81,NFIX,NR1D1,USP20,ELP4,POGLUT1,STT3B,FMN2,STT3A,COA3,LARP1B,KCTD17,SIN3A,RPS4X,ZDHHC20,POLA1,MAPK3,RFC3,UBE2H,PYGM,KMT2A,EDC4,SCRIB,TENT5A,PNRC2,UBE2W,ING3,MRPL32,RNF168,FAM98B,EOMES,US…
GO:BP	metal ion transport	GO:0030001	0.0403469	1.39419	893	384	35	21092	UBQLN1,SCN1A,CTNNB1,ITPR1,SLC4A10,PRKCB,FGF2,ASIC2,CACNB3,CACNG2,BBC3,CACNA1G,KLHL3,KCNH5,KCNH7,ATP1A1,CLTC,KCNQ5,GRIN2D,DIAPH1,ATP2B2,PLCG2,WNK3,KCNK10,CACNA1E,SPTBN4,CACNA1I,AHCYL1,SLC22A17,PSEN1,NKAIN2,GRIN2B,SLC12A2,RAMP2,PANX1
GO:BP	establishment of localization	GO:0051234	0.0409403	1.38785	4913	384	125	21092	APP,PTPN11,PRKAG2,EXT2,ANKH,PRKN,MAP2K1,TBX3,GLI3,SYN1,DCTN1,NDUFAF2,PPT1,BCR,FER,LRP8,UBQLN1,TGFB3,SCN1A,SMAD3,TSG101,ATP6V1G2,GRM1,CTNNB1,KIAA1109,IRS1,ITPR1,ADAM9,INHA,SUFU,SLC4A10,ATG16L1,RDX,COG4,TST,ARRB1,PRKCB,FGF2,DST,CUX1,HNRNPK,ASIC2,DAPK1,CKAP5,CACNB3,DAB2,NACA,CACNG2,BBC3,CACNA1G,RAB18,CHRM3,KLHL3,WDR81,SLC16A6,NR1D1,USP20,KCNH5,ABCA5,KCNH7,FMN2,ATP1A1,CLTC,STX8,KCNQ5,FZD5,DNAJC13,DPC…
GO:BP	cellular response to transforming growth factor beta stimulus	GO:0071560	0.0422441	1.37423	255	384	16	21092	TGFB3,MAP3K7,SMAD3,OGT,ADAM9,DAB2,HDAC1,SIN3A,PEG10,MAPK7,LEMD3,COL1A1,USP9X,CREBBP,LTBP2,CDKN1C
GO:BP	positive regulation of phosphorylation	GO:0042327	0.0427158	1.36941	821	384	33	21092	FLT3,APP,PTPN11,PRKAG2,MAP2K1,LRP8,TGFB3,MAP3K7,DDX3X,IRS1,ADAM9,INHA,ARRB1,CKS1B,FGF2,CCNT2,FZD8,DAB2,CCND3,FZD5,PLCG2,MAPK3,DIPK2A,WNK3,EFNA5,NTRK3,PSEN1,BMPR2,TENM1,MTOR,CSPG4,KDR,CSK
GO:BP	cell fate commitment	GO:0045165	0.042864	1.36791	284	384	17	21092	TBX3,GLI3,SOX2,CTNNB1,PTCH2,POU6F2,SUFU,FGF2,HDAC1,POU3F2,EOMES,NTRK3,PSEN1,TOX,MTOR,CHD4,KDR
GO:BP	osteoblast differentiation	GO:0001649	0.0441223	1.35534	228	384	15	21092	GLI3,SOX2,SMAD3,CTNNB1,LEF1,SUFU,FGF2,CLTC,DNAJC13,LGR4,TENT5A,COL1A1,CDK6,REST,BMPR2
GO:BP	transmembrane receptor protein serine/threonine kinase signaling pathway	GO:0007178	0.0453878	1.34306	376	384	20	21092	TGFB3,MAP3K7,SMAD3,LEF1,OGT,ADAM9,INHA,DAB2,HDAC1,SIN3A,PEG10,MAPK3,LEMD3,USP9X,CREBBP,LTBP2,BMPR2,CDKN1C,KDR,NBL1
GO:BP	positive regulation of response to stimulus	GO:0048584	0.0461088	1.33622	2214	384	67	21092	FLT3,APP,PTPN11,PRKN,MAP2K1,SOX2,UBQLN1,TGFB3,MAP3K7,CSNK2A1,SMAD3,PPP2R1B,DDX3X,GRM1,CTNNB1,LEF1,IRS1,RREB1,ADAM9,INHA,ROBO2,KMT2D,ARRB1,PRKCB,FGF2,FZD8,CACNB3,DAB2,BBC3,SMARCA2,POGLUT1,FMN2,FZD5,LGR4,GRIN2D,SIN3A,GPR137C,RIMS2,CTSC,PLCG2,MAPK3,STXBP1,PPP2R5B,AAK1,PHIP,ING3,RNF168,COL1A1,USP9X,CREBBP,SEMA5A,SEMA3A,NTRK3,PSEN1,BMPR2,TENM1,GRIN2B,MTOR,ING4,BMP2K,CDH13,CDKN1C,GUCY1A2,CSPG4,KDR,CSK,…
GO:BP	tube morphogenesis	GO:0035239	0.0480041	1.31872	863	384	34	21092	TBX3,GLI3,SMAD3,CTNNB1,LEF1,SUFU,HDAC9,JAK1,FAP,PRKCB,FGF2,ADAM15,FZD8,KLHL3,FZD5,COBL,LGR4,FZD2,MAPK7,DCHS1,CLIC4,SCRIB,SEMA5A,C1GALT1,PSEN1,BMPR2,DLC1,MTHFD1L,SLC12A2,CDH13,CSPG4,KDR,RAMP2,NAA15
GO:BP	positive regulation of cell projection organization	GO:0031346	0.0490039	1.30977	347	384	19	21092	MAP2K1,LRP8,TGFB3,RREB1,ROBO2,CUX1,COBL,KCTD17,PPP2R5B,EFNA5,SEMA5A,PLXNA4,NTRK3,BMPR2,TOX,TENM1,MTOR,CREB3L2,TRIM67

## Sheet: HCvApes_HIP
source	term_name	term_id	adjusted_p_value	negative_log10_of_adjusted_p_value	term_size	query_size	intersection_size	effective_domain_size	intersections
GO:BP	anatomical structure development	GO:0048856	1.77e-11	10.7528	5836	505	220	21092	ZIC2,MLH1,APP,ATP1A3,DLD,PRKN,CEP290,ANK2,FER,SLC25A12,NFIA,USP9X,GABRA2,SOX6,NDUFV2,DLC1,NR2F2,NEBL,PTCHD1,SLITRK4,SF1,THOC2,ROBO2,PDE4D,SOBP,ABL2,NUMB,GART,CALD1,TIAL1,SP8,CUX1,SOX5,PFDN5,STC1,ALCAM,ATF6,XRCC5,SMTN,PRKG1,ARID5B,GRIN2B,PRICKLE2,NCAM1,TSHZ1,KAT6B,KLHL3,SLIT3,NR1D1,PAK6,MIB1,KDM2B,DUSP6,DNAJB11,COL12A1,UTRN,OVOL2,CSRNP1,FZD5,PIK3R3,CALM3,CTR9,GRIN2D,AFF3,SIN3A,ADIPOR1,ANOS1,POR,L3…
GO:BP	developmental process	GO:0032502	4.98e-10	9.30317	6424	505	231	21092	ZIC2,MLH1,APP,ATP1A3,DLD,PRKN,CEP290,ANK2,FER,SLC25A12,NFIA,USP9X,GABRA2,SOX6,NDUFV2,DLC1,NR2F2,NEBL,PTCHD1,SLITRK4,SF1,THOC2,ROBO2,PDE4D,SOBP,ABL2,NUMB,GART,CALD1,TIAL1,SP8,CUX1,SOX5,PFDN5,STC1,ALCAM,ATF6,XRCC5,SMTN,PRKG1,ARID5B,GRIN2B,PRICKLE2,NCAM1,TSHZ1,KAT6B,KLHL3,GAS1,UNC13B,SLIT3,NR1D1,PAK6,MIB1,KDM2B,DUSP6,DNAJB11,COL12A1,UTRN,OVOL2,CSRNP1,FZD5,PIK3R3,CALM3,CTR9,GRIN2D,AFF3,SIN3A,ADIPOR1,…
GO:BP	nervous system development	GO:0007399	1.21e-09	8.91593	2504	505	117	21092	ZIC2,APP,ATP1A3,PRKN,CEP290,ANK2,SLC25A12,NFIA,USP9X,GABRA2,SOX6,NDUFV2,DLC1,NR2F2,PTCHD1,SLITRK4,THOC2,ROBO2,ABL2,NUMB,GART,CUX1,SOX5,ALCAM,XRCC5,PRKG1,GRIN2B,NCAM1,SLIT3,NR1D1,PAK6,MIB1,KDM2B,DNAJB11,OVOL2,FZD5,CALM3,GRIN2D,SIN3A,ANOS1,SSBP3,SLC6A17,PLAA,KIF2A,COPS2,BCL11B,KIF20B,CDKL5,SCYL2,SCN8A,DPF2,ATP2B2,RIMS2,ID4,ARCN1,CTSC,INHBA,PCSK2,MAPK3,STXBP1,TGFB2,TMEFF1,PLPP3,SYNGR3,ARL3,MYT1,MMP1…
GO:BP	multicellular organism development	GO:0007275	2.73e-09	8.56371	4823	505	185	21092	ZIC2,MLH1,APP,ATP1A3,DLD,PRKN,CEP290,ANK2,FER,SLC25A12,NFIA,USP9X,GABRA2,SOX6,NDUFV2,DLC1,NR2F2,NEBL,PTCHD1,SLITRK4,SF1,THOC2,ROBO2,SOBP,ABL2,NUMB,GART,CALD1,SP8,CUX1,SOX5,PFDN5,STC1,ALCAM,ATF6,XRCC5,PRKG1,ARID5B,GRIN2B,NCAM1,TSHZ1,KAT6B,KLHL3,SLIT3,NR1D1,PAK6,MIB1,KDM2B,DUSP6,DNAJB11,COL12A1,OVOL2,CSRNP1,FZD5,PIK3R3,CALM3,CTR9,GRIN2D,AFF3,SIN3A,ANOS1,POR,L3MBTL3,SSBP3,SLC6A17,PLAA,KIF2A,COPS2,SP…
GO:BP	system development	GO:0048731	1.24e-08	7.905	4369	505	170	21092	ZIC2,MLH1,APP,ATP1A3,PRKN,CEP290,ANK2,FER,SLC25A12,NFIA,USP9X,GABRA2,SOX6,NDUFV2,DLC1,NR2F2,NEBL,PTCHD1,SLITRK4,SF1,THOC2,ROBO2,ABL2,NUMB,GART,CALD1,CUX1,SOX5,PFDN5,STC1,ALCAM,ATF6,XRCC5,PRKG1,ARID5B,GRIN2B,NCAM1,KAT6B,KLHL3,SLIT3,NR1D1,PAK6,MIB1,KDM2B,DUSP6,DNAJB11,OVOL2,CSRNP1,FZD5,PIK3R3,CALM3,CTR9,GRIN2D,SIN3A,ANOS1,POR,L3MBTL3,SSBP3,SLC6A17,PLAA,KIF2A,COPS2,PTBP3,TFE3,BCL11B,KIF20B,CDKL5,SCY…
GO:BP	anatomical structure morphogenesis	GO:0009653	1.3e-08	7.8861	2722	505	121	21092	APP,DLD,PRKN,CEP290,ANK2,FER,USP9X,SOX6,DLC1,NR2F2,NEBL,SLITRK4,THOC2,ROBO2,SOBP,NUMB,CALD1,SP8,CUX1,SOX5,STC1,ALCAM,ARID5B,PRICKLE2,NCAM1,TSHZ1,KLHL3,SLIT3,PAK6,MIB1,KDM2B,COL12A1,OVOL2,CSRNP1,FZD5,PIK3R3,CTR9,AFF3,SIN3A,ANOS1,POR,SSBP3,PLAA,PID1,SP9,PTBP3,BCL11B,KIF20B,CDKL5,FGD4,ETS1,RIMS2,CELSR3,ID4,CDH8,INHBA,ITGA5,MAPK3,MAPK7,HTRA1,SNAI2,STXBP1,TGFB2,THBS1,CUL1,TMEFF1,PLPP3,CAPZB,MMP14,DLX6…
GO:BP	macromolecule biosynthetic process	GO:0009059	2.75e-08	7.56043	4801	505	181	21092	ZIC2,MLH1,APP,PRKN,CEP290,EPM2AIP1,TARDBP,UPF3B,FER,JAZF1,NFIA,GBE1,USP9X,RPS24,B3GALT2,HS6ST2,SOX6,IRS1,TERC,NR2F2,HDX,CDKAL1,SF1,PABPC1,TIAL1,SP8,CUX1,HNRNPK,SOX5,PFDN5,ATF6,XRCC5,CHST1,ARID5B,NFIC,RBM14,TSHZ1,KAT6B,NR1D1,PAK6,KDM2B,SMG6,STT3B,VARS2,CCND3,OVOL2,KDM5A,URI1,LARP1B,CSRNP1,FZD5,GALNT14,ZNF287,CTR9,AFF3,SIN3A,POLR2A,RPS4X,L3MBTL3,SSBP3,BCL7A,FTO,DDX17,PID1,ZNF507,COPS2,SP9,KLF9,CDC5…
GO:BP	regulation of macromolecule biosynthetic process	GO:0010556	5.02e-08	7.29893	3951	505	156	21092	ZIC2,MLH1,APP,PRKN,CEP290,EPM2AIP1,TARDBP,UPF3B,FER,JAZF1,NFIA,USP9X,SOX6,IRS1,NR2F2,HDX,SF1,PABPC1,TIAL1,SP8,CUX1,HNRNPK,SOX5,PFDN5,ATF6,XRCC5,ARID5B,NFIC,RBM14,TSHZ1,KAT6B,NR1D1,PAK6,KDM2B,SMG6,CCND3,OVOL2,KDM5A,URI1,LARP1B,CSRNP1,FZD5,ZNF287,CTR9,AFF3,SIN3A,RPS4X,L3MBTL3,SSBP3,BCL7A,FTO,DDX17,PID1,ZNF507,COPS2,SP9,KLF9,CDC5L,TFE3,BCL11B,EIF4E2,ZNF618,DPF2,INTS2,ETS1,ZNF569,PPARGC1A,GPBP1,ZNF38…
GO:BP	regulation of primary metabolic process	GO:0080090	5.78e-08	7.23826	5869	505	209	21092	ZIC2,MLH1,APP,PRKN,CEP290,EPM2AIP1,TARDBP,UPF3B,ERCC8,FER,JAZF1,SLC25A12,NFIA,USP9X,SOX6,IRS1,DLC1,NR2F2,HDX,SF1,PABPC1,FBXO33,PDE4D,TIAL1,SP8,CUX1,HNRNPK,SOX5,PFDN5,ATF6,XRCC5,ARID5B,NFIC,RBM14,GRIN2B,TSHZ1,KAT6B,GAS1,NR1D1,PAK6,KDM2B,DUSP6,SMG6,CCND3,PSME2,OVOL2,KDM5A,URI1,LARP1B,CSRNP1,FZD5,PIK3R3,CALM3,ZNF287,CTR9,AFF3,SIN3A,ADIPOR1,ANOS1,POR,RPS4X,L3MBTL3,SSBP3,BCL7A,PLAA,FTO,DDX17,PID1,ZNF5…
GO:BP	regulation of cellular process	GO:0050794	6.06e-08	7.21782	11130	505	339	21092	ZIC2,MLH1,APP,DLD,PRCC,PRKN,CEP290,EPM2AIP1,TARDBP,ANK2,UPF3B,ERCC8,GPC5,GRIA3,FER,JAZF1,SLC25A12,NFIA,GBE1,USP9X,GABRA2,GRM1,SOX6,IRS1,DLC1,TERC,NR2F2,HDX,PTCHD1,SLITRK4,SF1,THOC2,PABPC1,ROBO2,PDE4D,ARHGEF12,ABL2,NUMB,TIAL1,SP8,CUX1,HNRNPK,SOX5,PFDN5,STC1,ALCAM,ATF6,XRCC5,CKAP5,PRKG1,ARID5B,NFIC,TRPC1,RBM14,RCAN2,GRIN2B,PRICKLE2,NCAM1,TSHZ1,KAT6B,GAS1,CAMKMT,UNC13B,SLIT3,NR1D1,PAK6,MIB1,KDM2B,DU…
GO:BP	regulation of cellular metabolic process	GO:0031323	1.15e-07	6.93818	5649	505	202	21092	ZIC2,MLH1,APP,PRKN,CEP290,EPM2AIP1,TARDBP,UPF3B,ERCC8,FER,JAZF1,SLC25A12,NFIA,USP9X,SOX6,IRS1,DLC1,TERC,NR2F2,HDX,SF1,PABPC1,PDE4D,ABL2,TIAL1,SP8,CUX1,HNRNPK,SOX5,PFDN5,ATF6,XRCC5,ARID5B,NFIC,RBM14,TSHZ1,KAT6B,NR1D1,PAK6,KDM2B,DUSP6,SMG6,CCND3,OVOL2,KDM5A,ATP6V0A1,URI1,LARP1B,CSRNP1,FZD5,PIK3R3,CALM3,ZNF287,CTR9,AFF3,SIN3A,TBC1D25,ADIPOR1,POR,RPS4X,L3MBTL3,SSBP3,BCL7A,FTO,DDX17,PID1,ZNF507,CPSF7,…
GO:BP	organic substance biosynthetic process	GO:1901576	1.57e-07	6.80408	5854	505	207	21092	ZIC2,MLH1,APP,DLD,PRKN,CEP290,EPM2AIP1,TARDBP,DPYD,UPF3B,FER,JAZF1,SLC25A12,NFIA,GBE1,USP9X,RPS24,B3GALT2,HS6ST2,SOX6,NDUFV2,IRS1,TERC,NR2F2,HDX,CDKAL1,SF1,PABPC1,KDSR,GART,TIAL1,SP8,CUX1,HNRNPK,SOX5,PFDN5,ATF6,XRCC5,CHST1,ARID5B,NFIC,TRPC1,RBM14,TSHZ1,KAT6B,NR1D1,PAK6,KDM2B,SMG6,STT3B,VARS2,NADK2,CCND3,NDUFA8,OVOL2,KDM5A,URI1,LARP1B,CSRNP1,FZD5,PIK3R3,GALNT14,ZNF287,CTR9,AFF3,SIN3A,POLR2A,POR,AT…
GO:BP	regulation of cellular biosynthetic process	GO:0031326	1.58e-07	6.80089	4114	505	159	21092	ZIC2,MLH1,APP,PRKN,CEP290,EPM2AIP1,TARDBP,UPF3B,FER,JAZF1,SLC25A12,NFIA,USP9X,SOX6,IRS1,NR2F2,HDX,SF1,PABPC1,TIAL1,SP8,CUX1,HNRNPK,SOX5,PFDN5,ATF6,XRCC5,ARID5B,NFIC,RBM14,TSHZ1,KAT6B,NR1D1,PAK6,KDM2B,SMG6,CCND3,OVOL2,KDM5A,URI1,LARP1B,CSRNP1,FZD5,ZNF287,CTR9,AFF3,SIN3A,POR,RPS4X,L3MBTL3,SSBP3,BCL7A,FTO,DDX17,PID1,ZNF507,COPS2,SP9,KLF9,CDC5L,TFE3,BCL11B,EIF4E2,ZNF618,DPF2,INTS2,ETS1,ZNF569,PPARGC1…
GO:BP	transcription by RNA polymerase II	GO:0006366	2.05e-07	6.68807	2676	505	116	21092	ZIC2,APP,PRKN,JAZF1,NFIA,USP9X,SOX6,NR2F2,HDX,TIAL1,SP8,CUX1,HNRNPK,SOX5,ATF6,ARID5B,NFIC,RBM14,TSHZ1,KAT6B,NR1D1,KDM2B,CCND3,OVOL2,KDM5A,URI1,CSRNP1,FZD5,ZNF287,CTR9,SIN3A,POLR2A,SSBP3,BCL7A,DDX17,PID1,ZNF507,COPS2,SP9,KLF9,CDC5L,TFE3,BCL11B,DPF2,INTS2,ETS1,ZNF569,PPARGC1A,GPBP1,ZNF383,ZNF112,ID4,INHBA,MAPK3,MAPK7,SNAI2,ZNF134,SAP30,MYT1,DLX6,TRIM28,KMT2A,RAD21,TSG101,BRD3,SCAF8,RCOR1,RPAP1,PIAS…
GO:BP	regulation of biosynthetic process	GO:0009889	2.59e-07	6.58744	4175	505	160	21092	ZIC2,MLH1,APP,PRKN,CEP290,EPM2AIP1,TARDBP,UPF3B,FER,JAZF1,SLC25A12,NFIA,USP9X,SOX6,IRS1,NR2F2,HDX,SF1,PABPC1,TIAL1,SP8,CUX1,HNRNPK,SOX5,PFDN5,ATF6,XRCC5,ARID5B,NFIC,RBM14,TSHZ1,KAT6B,NR1D1,PAK6,KDM2B,SMG6,CCND3,OVOL2,KDM5A,URI1,LARP1B,CSRNP1,FZD5,ZNF287,CTR9,AFF3,SIN3A,POR,RPS4X,L3MBTL3,SSBP3,BCL7A,FTO,DDX17,PID1,ZNF507,COPS2,SP9,KLF9,CDC5L,TFE3,BCL11B,EIF4E2,ZNF618,DPF2,INTS2,ETS1,ZNF569,PPARGC1…
GO:BP	animal organ development	GO:0048513	2.89e-07	6.53913	3591	505	143	21092	ZIC2,APP,ATP1A3,CEP290,ANK2,FER,NFIA,SOX6,NDUFV2,DLC1,NR2F2,NEBL,PTCHD1,SF1,ROBO2,SOBP,NUMB,GART,SOX5,PFDN5,STC1,ATF6,XRCC5,SMTN,PRKG1,ARID5B,GRIN2B,PRICKLE2,TSHZ1,KAT6B,KLHL3,SLIT3,MIB1,KDM2B,DUSP6,UTRN,OVOL2,CSRNP1,FZD5,PIK3R3,CALM3,CTR9,GRIN2D,SIN3A,ADIPOR1,POR,L3MBTL3,SSBP3,SLC6A17,FTO,DDX17,COPS2,PTBP3,TFE3,BCL11B,SCYL2,DPF2,ETS1,ATP2B2,PPARGC1A,CELSR3,ID4,ARCN1,INHBA,MAPK3,HTRA1,SNAI2,TGFB2…
GO:BP	regulation of nitrogen compound metabolic process	GO:0051171	2.98e-07	6.52591	5706	505	202	21092	ZIC2,MLH1,APP,PRKN,CEP290,TARDBP,UPF3B,ERCC8,FER,JAZF1,SLC25A12,NFIA,USP9X,SOX6,DLC1,NR2F2,HDX,SF1,PABPC1,FBXO33,PDE4D,TIAL1,SP8,CUX1,HNRNPK,SOX5,PFDN5,ATF6,XRCC5,ARID5B,NFIC,RBM14,GRIN2B,TSHZ1,KAT6B,GAS1,NR1D1,PAK6,KDM2B,DUSP6,SMG6,CCND3,PSME2,OVOL2,KDM5A,URI1,LARP1B,CSRNP1,FZD5,PIK3R3,CALM3,ZNF287,CTR9,AFF3,SIN3A,ANOS1,POR,RPS4X,L3MBTL3,SSBP3,BCL7A,PLAA,FTO,DDX17,PID1,ZNF507,CPSF7,COPS2,SP9,KLF…
GO:BP	biosynthetic process	GO:0009058	3.52e-07	6.45338	5941	505	208	21092	ZIC2,MLH1,APP,DLD,PRKN,CEP290,EPM2AIP1,TARDBP,DPYD,UPF3B,FER,JAZF1,SLC25A12,NFIA,GBE1,USP9X,RPS24,B3GALT2,HS6ST2,SOX6,NDUFV2,IRS1,TERC,NR2F2,HDX,CDKAL1,SF1,PABPC1,KDSR,GART,TIAL1,SP8,CUX1,HNRNPK,SOX5,PFDN5,ATF6,XRCC5,CHST1,ARID5B,NFIC,TRPC1,RBM14,TSHZ1,KAT6B,NR1D1,PAK6,KDM2B,SMG6,STT3B,VARS2,NADK2,CCND3,NDUFA8,OVOL2,KDM5A,URI1,LARP1B,CSRNP1,FZD5,PIK3R3,GALNT14,ZNF287,CTR9,AFF3,SIN3A,POLR2A,POR,AT…
GO:BP	regulation of transcription by RNA polymerase II	GO:0006357	3.86e-07	6.4134	2574	505	112	21092	ZIC2,APP,PRKN,JAZF1,NFIA,USP9X,SOX6,NR2F2,HDX,TIAL1,SP8,CUX1,HNRNPK,SOX5,ATF6,ARID5B,NFIC,RBM14,TSHZ1,KAT6B,NR1D1,KDM2B,CCND3,OVOL2,KDM5A,URI1,CSRNP1,FZD5,ZNF287,CTR9,SIN3A,SSBP3,BCL7A,DDX17,PID1,ZNF507,COPS2,SP9,KLF9,CDC5L,TFE3,BCL11B,DPF2,ETS1,ZNF569,PPARGC1A,GPBP1,ZNF383,ZNF112,ID4,INHBA,MAPK3,MAPK7,SNAI2,ZNF134,SAP30,MYT1,DLX6,TRIM28,KMT2A,RAD21,TSG101,BRD3,SCAF8,RCOR1,PIAS1,PHIP,IMPACT,ENY2,…
GO:BP	cellular biosynthetic process	GO:0044249	5.58e-07	6.25301	5782	505	203	21092	ZIC2,MLH1,APP,DLD,PRKN,CEP290,EPM2AIP1,TARDBP,DPYD,UPF3B,FER,JAZF1,SLC25A12,NFIA,GBE1,USP9X,RPS24,B3GALT2,HS6ST2,SOX6,NDUFV2,IRS1,TERC,NR2F2,HDX,CDKAL1,SF1,PABPC1,KDSR,GART,TIAL1,SP8,CUX1,HNRNPK,SOX5,PFDN5,ATF6,XRCC5,CHST1,ARID5B,NFIC,TRPC1,RBM14,TSHZ1,KAT6B,NR1D1,PAK6,KDM2B,SMG6,STT3B,VARS2,NADK2,CCND3,NDUFA8,OVOL2,KDM5A,URI1,LARP1B,CSRNP1,FZD5,PIK3R3,GALNT14,ZNF287,CTR9,AFF3,SIN3A,POLR2A,POR,AT…
GO:BP	regulation of nucleobase-containing compound metabolic process	GO:0019219	7.02e-07	6.15339	4088	505	156	21092	ZIC2,MLH1,APP,PRKN,CEP290,TARDBP,ERCC8,FER,JAZF1,SLC25A12,NFIA,USP9X,SOX6,NR2F2,HDX,SF1,PABPC1,TIAL1,SP8,CUX1,HNRNPK,SOX5,PFDN5,ATF6,XRCC5,ARID5B,NFIC,RBM14,TSHZ1,KAT6B,NR1D1,PAK6,KDM2B,SMG6,CCND3,OVOL2,KDM5A,URI1,CSRNP1,FZD5,ZNF287,CTR9,AFF3,SIN3A,L3MBTL3,SSBP3,BCL7A,FTO,DDX17,PID1,ZNF507,CPSF7,COPS2,SP9,KLF9,PTBP3,CDC5L,TFE3,BCL11B,ZNF618,DPF2,INTS2,ETS1,ZNF569,PPARGC1A,GPBP1,ZNF383,ZNF112,ID4,…
GO:BP	regulation of DNA-templated transcription	GO:0006355	1.6591e-06	5.78014	3474	505	137	21092	ZIC2,APP,PRKN,CEP290,FER,JAZF1,NFIA,USP9X,SOX6,NR2F2,HDX,SF1,TIAL1,SP8,CUX1,HNRNPK,SOX5,PFDN5,ATF6,XRCC5,ARID5B,NFIC,RBM14,TSHZ1,KAT6B,NR1D1,PAK6,KDM2B,CCND3,OVOL2,KDM5A,URI1,CSRNP1,FZD5,ZNF287,CTR9,AFF3,SIN3A,L3MBTL3,SSBP3,BCL7A,DDX17,PID1,ZNF507,COPS2,SP9,KLF9,CDC5L,TFE3,BCL11B,ZNF618,DPF2,INTS2,ETS1,ZNF569,PPARGC1A,GPBP1,ZNF383,ZNF112,ID4,INHBA,MAPK3,MAPK7,SNAI2,TGFB2,SUMO1,ZNF134,PLPP3,SAP30,…
GO:BP	regulation of nucleic acid-templated transcription	GO:1903506	1.6917e-06	5.77168	3475	505	137	21092	ZIC2,APP,PRKN,CEP290,FER,JAZF1,NFIA,USP9X,SOX6,NR2F2,HDX,SF1,TIAL1,SP8,CUX1,HNRNPK,SOX5,PFDN5,ATF6,XRCC5,ARID5B,NFIC,RBM14,TSHZ1,KAT6B,NR1D1,PAK6,KDM2B,CCND3,OVOL2,KDM5A,URI1,CSRNP1,FZD5,ZNF287,CTR9,AFF3,SIN3A,L3MBTL3,SSBP3,BCL7A,DDX17,PID1,ZNF507,COPS2,SP9,KLF9,CDC5L,TFE3,BCL11B,ZNF618,DPF2,INTS2,ETS1,ZNF569,PPARGC1A,GPBP1,ZNF383,ZNF112,ID4,INHBA,MAPK3,MAPK7,SNAI2,TGFB2,SUMO1,ZNF134,PLPP3,SAP30,…
GO:BP	RNA biosynthetic process	GO:0032774	1.7752e-06	5.75076	3615	505	141	21092	ZIC2,APP,PRKN,CEP290,FER,JAZF1,NFIA,USP9X,SOX6,NR2F2,HDX,SF1,TIAL1,SP8,CUX1,HNRNPK,SOX5,PFDN5,ATF6,XRCC5,ARID5B,NFIC,RBM14,TSHZ1,KAT6B,NR1D1,PAK6,KDM2B,CCND3,OVOL2,KDM5A,URI1,CSRNP1,FZD5,ZNF287,CTR9,AFF3,SIN3A,POLR2A,L3MBTL3,SSBP3,BCL7A,DDX17,PID1,ZNF507,COPS2,SP9,KLF9,CDC5L,TFE3,BCL11B,ZNF618,DPF2,POLA1,INTS2,ETS1,ZNF569,PPARGC1A,GPBP1,ZNF383,ZNF112,ID4,INHBA,MAPK3,MAPK7,SNAI2,TGFB2,SUMO1,ZNF134…
GO:BP	regulation of RNA biosynthetic process	GO:2001141	2.0147e-06	5.69579	3484	505	137	21092	ZIC2,APP,PRKN,CEP290,FER,JAZF1,NFIA,USP9X,SOX6,NR2F2,HDX,SF1,TIAL1,SP8,CUX1,HNRNPK,SOX5,PFDN5,ATF6,XRCC5,ARID5B,NFIC,RBM14,TSHZ1,KAT6B,NR1D1,PAK6,KDM2B,CCND3,OVOL2,KDM5A,URI1,CSRNP1,FZD5,ZNF287,CTR9,AFF3,SIN3A,L3MBTL3,SSBP3,BCL7A,DDX17,PID1,ZNF507,COPS2,SP9,KLF9,CDC5L,TFE3,BCL11B,ZNF618,DPF2,INTS2,ETS1,ZNF569,PPARGC1A,GPBP1,ZNF383,ZNF112,ID4,INHBA,MAPK3,MAPK7,SNAI2,TGFB2,SUMO1,ZNF134,PLPP3,SAP30,…
GO:BP	DNA-templated transcription	GO:0006351	2.3399e-06	5.6308	3595	505	140	21092	ZIC2,APP,PRKN,CEP290,FER,JAZF1,NFIA,USP9X,SOX6,NR2F2,HDX,SF1,TIAL1,SP8,CUX1,HNRNPK,SOX5,PFDN5,ATF6,XRCC5,ARID5B,NFIC,RBM14,TSHZ1,KAT6B,NR1D1,PAK6,KDM2B,CCND3,OVOL2,KDM5A,URI1,CSRNP1,FZD5,ZNF287,CTR9,AFF3,SIN3A,POLR2A,L3MBTL3,SSBP3,BCL7A,DDX17,PID1,ZNF507,COPS2,SP9,KLF9,CDC5L,TFE3,BCL11B,ZNF618,DPF2,INTS2,ETS1,ZNF569,PPARGC1A,GPBP1,ZNF383,ZNF112,ID4,INHBA,MAPK3,MAPK7,SNAI2,TGFB2,SUMO1,ZNF134,PLPP3…
GO:BP	nucleobase-containing compound biosynthetic process	GO:0034654	2.3665e-06	5.62588	4049	505	153	21092	ZIC2,APP,DLD,PRKN,CEP290,FER,JAZF1,SLC25A12,NFIA,USP9X,SOX6,NDUFV2,TERC,NR2F2,HDX,SF1,GART,TIAL1,SP8,CUX1,HNRNPK,SOX5,PFDN5,ATF6,XRCC5,ARID5B,NFIC,RBM14,TSHZ1,KAT6B,NR1D1,PAK6,KDM2B,SMG6,NADK2,CCND3,NDUFA8,OVOL2,KDM5A,URI1,CSRNP1,FZD5,ZNF287,CTR9,AFF3,SIN3A,POLR2A,ATP5F1C,L3MBTL3,SSBP3,BCL7A,DDX17,PID1,ZNF507,COPS2,SP9,KLF9,CDC5L,GUCY1A2,TFE3,BCL11B,ZNF618,DPF2,POLA1,INTS2,ETS1,ZNF569,PPARGC1A,GP…
GO:BP	nucleic acid-templated transcription	GO:0097659	2.3848e-06	5.62255	3596	505	140	21092	ZIC2,APP,PRKN,CEP290,FER,JAZF1,NFIA,USP9X,SOX6,NR2F2,HDX,SF1,TIAL1,SP8,CUX1,HNRNPK,SOX5,PFDN5,ATF6,XRCC5,ARID5B,NFIC,RBM14,TSHZ1,KAT6B,NR1D1,PAK6,KDM2B,CCND3,OVOL2,KDM5A,URI1,CSRNP1,FZD5,ZNF287,CTR9,AFF3,SIN3A,POLR2A,L3MBTL3,SSBP3,BCL7A,DDX17,PID1,ZNF507,COPS2,SP9,KLF9,CDC5L,TFE3,BCL11B,ZNF618,DPF2,INTS2,ETS1,ZNF569,PPARGC1A,GPBP1,ZNF383,ZNF112,ID4,INHBA,MAPK3,MAPK7,SNAI2,TGFB2,SUMO1,ZNF134,PLPP3…
GO:BP	biological regulation	GO:0065007	2.3922e-06	5.62119	13096	505	377	21092	ZIC2,MLH1,APP,ATP1A3,DLD,PRCC,PRKN,CEP290,EPM2AIP1,TARDBP,ANK2,UPF3B,ERCC8,GPC5,GRIA3,FER,JAZF1,SLC25A12,NFIA,GBE1,USP9X,RPS24,GABRA2,GRM1,SOX6,IRS1,DLC1,TERC,NR2F2,HDX,PTCHD1,SLITRK4,SF1,THOC2,PABPC1,FBXO33,ROBO2,PDE4D,ARHGEF12,ABL2,NUMB,TIAL1,SP8,CUX1,HNRNPK,SOX5,PFDN5,STC1,ALCAM,ATF6,XRCC5,CKAP5,PIANP,PRKG1,ARID5B,NFIC,TRPC1,RBM14,RCAN2,GRIN2B,PRICKLE2,NCAM1,TSHZ1,KAT6B,KLHL3,GAS1,CAMKMT,UNC13…
GO:BP	regulation of RNA metabolic process	GO:0051252	2.6522e-06	5.57639	3775	505	145	21092	ZIC2,MLH1,APP,PRKN,CEP290,TARDBP,FER,JAZF1,NFIA,USP9X,SOX6,NR2F2,HDX,SF1,PABPC1,TIAL1,SP8,CUX1,HNRNPK,SOX5,PFDN5,ATF6,XRCC5,ARID5B,NFIC,RBM14,TSHZ1,KAT6B,NR1D1,PAK6,KDM2B,CCND3,OVOL2,KDM5A,URI1,CSRNP1,FZD5,ZNF287,CTR9,AFF3,SIN3A,L3MBTL3,SSBP3,BCL7A,FTO,DDX17,PID1,ZNF507,CPSF7,COPS2,SP9,KLF9,PTBP3,CDC5L,TFE3,BCL11B,ZNF618,DPF2,INTS2,ETS1,ZNF569,PPARGC1A,GPBP1,ZNF383,ZNF112,ID4,INHBA,MAPK3,MAPK7,SN…
GO:BP	positive regulation of nitrogen compound metabolic process	GO:0051173	4.6446e-06	5.33305	3152	505	126	21092	ZIC2,MLH1,APP,PRKN,CEP290,TARDBP,UPF3B,ERCC8,SLC25A12,NFIA,USP9X,DLC1,NR2F2,PABPC1,FBXO33,HNRNPK,ATF6,XRCC5,ARID5B,NFIC,RBM14,GRIN2B,KAT6B,NR1D1,CCND3,PSME2,OVOL2,KDM5A,LARP1B,CSRNP1,FZD5,PIK3R3,CALM3,ZNF287,CTR9,SIN3A,RPS4X,SSBP3,BCL7A,FTO,DDX17,PID1,ZNF507,CDC5L,TFE3,BCL11B,DPF2,ETS1,PPARGC1A,GPBP1,ZNF112,ID4,CCND2,CTSC,INHBA,ITGA5,MAPK3,MAPK7,SNAI2,TGFB2,THBS1,SUMO1,PLPP3,EIF3D,MMP14,LCP2,TRIM…
GO:BP	head development	GO:0060322	5.15e-06	5.28819	828	505	50	21092	ZIC2,APP,ATP1A3,CEP290,SOX6,DLC1,NR2F2,PTCHD1,ROBO2,NUMB,GART,XRCC5,PRKG1,ARID5B,GRIN2B,KDM2B,CSRNP1,CALM3,GRIN2D,SIN3A,SSBP3,SLC6A17,BCL11B,SCYL2,ATP2B2,ID4,ARCN1,INHBA,MAPK3,SYNGR3,MMP14,DLX6,STXBP3,MACO1,UBA6,COL1A1,ATM,PTPRG,ADGRL3,SEMA5A,PLXNA4,SPTBN2,TTBK2,KAT2A,EPHA7,BRAF,LRRK2,DIXDC1,DAB1,SCN5A
GO:BP	positive regulation of macromolecule metabolic process	GO:0010604	5.3186e-06	5.2742	3535	505	137	21092	ZIC2,MLH1,APP,PRKN,CEP290,EPM2AIP1,TARDBP,ANK2,UPF3B,ERCC8,NFIA,USP9X,IRS1,DLC1,NR2F2,PABPC1,FBXO33,PDE4D,HNRNPK,ATF6,XRCC5,ARID5B,NFIC,RBM14,GRIN2B,KAT6B,NR1D1,CCND3,PSME2,OVOL2,KDM5A,LARP1B,CSRNP1,FZD5,PIK3R3,CALM3,ZNF287,CTR9,SIN3A,RPS4X,SSBP3,BCL7A,FTO,DDX17,PID1,STMP1,ZNF507,CDC5L,TFE3,BCL11B,DPF2,ETS1,PPARGC1A,GPBP1,ZNF112,ID4,CCND2,CTSC,INHBA,ITGA5,MAPK3,MAPK7,SNAI2,TGFB2,THBS1,SUMO1,PLPP3…
GO:BP	aromatic compound biosynthetic process	GO:0019438	5.5975e-06	5.25201	4133	505	154	21092	ZIC2,APP,DLD,PRKN,CEP290,FER,JAZF1,SLC25A12,NFIA,USP9X,SOX6,NDUFV2,TERC,NR2F2,HDX,SF1,GART,TIAL1,SP8,CUX1,HNRNPK,SOX5,PFDN5,ATF6,XRCC5,ARID5B,NFIC,TRPC1,RBM14,TSHZ1,KAT6B,NR1D1,PAK6,KDM2B,SMG6,NADK2,CCND3,NDUFA8,OVOL2,KDM5A,URI1,CSRNP1,FZD5,ZNF287,CTR9,AFF3,SIN3A,POLR2A,ATP5F1C,L3MBTL3,SSBP3,BCL7A,DDX17,PID1,ZNF507,COPS2,SP9,KLF9,CDC5L,GUCY1A2,TFE3,BCL11B,ZNF618,DPF2,POLA1,INTS2,ETS1,ZNF569,PPARG…
GO:BP	cellular nitrogen compound biosynthetic process	GO:0044271	5.6207e-06	5.25021	4853	505	174	21092	ZIC2,MLH1,APP,DLD,PRKN,CEP290,TARDBP,UPF3B,FER,JAZF1,SLC25A12,NFIA,USP9X,RPS24,B3GALT2,SOX6,NDUFV2,TERC,NR2F2,HDX,CDKAL1,SF1,PABPC1,GART,TIAL1,SP8,CUX1,HNRNPK,SOX5,PFDN5,ATF6,XRCC5,ARID5B,NFIC,RBM14,TSHZ1,KAT6B,NR1D1,PAK6,KDM2B,SMG6,VARS2,NADK2,CCND3,NDUFA8,OVOL2,KDM5A,URI1,LARP1B,CSRNP1,FZD5,ZNF287,CTR9,AFF3,SIN3A,POLR2A,ATP5F1C,RPS4X,L3MBTL3,SSBP3,BCL7A,FTO,DDX17,PID1,ZNF507,COPS2,SP9,KLF9,CDC5…
GO:BP	organic cyclic compound biosynthetic process	GO:1901362	6.0635e-06	5.21727	4280	505	158	21092	ZIC2,APP,DLD,PRKN,CEP290,FER,JAZF1,SLC25A12,NFIA,USP9X,SOX6,NDUFV2,TERC,NR2F2,HDX,SF1,GART,TIAL1,SP8,CUX1,HNRNPK,SOX5,PFDN5,ATF6,XRCC5,ARID5B,NFIC,TRPC1,RBM14,TSHZ1,KAT6B,NR1D1,PAK6,KDM2B,SMG6,NADK2,CCND3,NDUFA8,OVOL2,KDM5A,URI1,CSRNP1,FZD5,ZNF287,CTR9,AFF3,SIN3A,POLR2A,POR,ATP5F1C,L3MBTL3,SSBP3,BCL7A,DDX17,PID1,ZNF507,COPS2,SP9,KLF9,CDC5L,GUCY1A2,TFE3,BCL11B,ZNF618,DPF2,POLA1,INTS2,ETS1,ZNF569,P…
GO:BP	heterocycle biosynthetic process	GO:0018130	8.5544e-06	5.06781	4122	505	153	21092	ZIC2,APP,DLD,PRKN,CEP290,FER,JAZF1,SLC25A12,NFIA,USP9X,SOX6,NDUFV2,TERC,NR2F2,HDX,SF1,GART,TIAL1,SP8,CUX1,HNRNPK,SOX5,PFDN5,ATF6,XRCC5,ARID5B,NFIC,RBM14,TSHZ1,KAT6B,NR1D1,PAK6,KDM2B,SMG6,NADK2,CCND3,NDUFA8,OVOL2,KDM5A,URI1,CSRNP1,FZD5,ZNF287,CTR9,AFF3,SIN3A,POLR2A,ATP5F1C,L3MBTL3,SSBP3,BCL7A,DDX17,PID1,ZNF507,COPS2,SP9,KLF9,CDC5L,GUCY1A2,TFE3,BCL11B,ZNF618,DPF2,POLA1,INTS2,ETS1,ZNF569,PPARGC1A,GP…
GO:BP	positive regulation of metabolic process	GO:0009893	1.8721e-05	4.72767	3849	505	144	21092	ZIC2,MLH1,APP,PRKN,CEP290,EPM2AIP1,TARDBP,ANK2,UPF3B,ERCC8,SLC25A12,NFIA,USP9X,IRS1,DLC1,NR2F2,PABPC1,FBXO33,PDE4D,HNRNPK,ATF6,XRCC5,ARID5B,NFIC,RBM14,GRIN2B,KAT6B,NR1D1,CCND3,PSME2,OVOL2,KDM5A,LARP1B,CSRNP1,FZD5,PIK3R3,CALM3,ZNF287,CTR9,SIN3A,ADIPOR1,POR,RPS4X,SSBP3,BCL7A,FTO,DDX17,PID1,STMP1,ZNF507,CDC5L,TFE3,BCL11B,DPF2,ETS1,PPARGC1A,GPBP1,ZNF112,DYNC1H1,ID4,CCND2,CTSC,INHBA,ITGA5,MAPK3,MAPK7,…
GO:BP	regulation of biological process	GO:0050789	2.0946e-05	4.6789	12361	505	357	21092	ZIC2,MLH1,APP,ATP1A3,DLD,PRCC,PRKN,CEP290,EPM2AIP1,TARDBP,ANK2,UPF3B,ERCC8,GPC5,GRIA3,FER,JAZF1,SLC25A12,NFIA,GBE1,USP9X,GABRA2,GRM1,SOX6,IRS1,DLC1,TERC,NR2F2,HDX,PTCHD1,SLITRK4,SF1,THOC2,PABPC1,FBXO33,ROBO2,PDE4D,ARHGEF12,ABL2,NUMB,TIAL1,SP8,CUX1,HNRNPK,SOX5,PFDN5,STC1,ALCAM,ATF6,XRCC5,CKAP5,PIANP,PRKG1,ARID5B,NFIC,TRPC1,RBM14,RCAN2,GRIN2B,PRICKLE2,NCAM1,TSHZ1,KAT6B,GAS1,CAMKMT,UNC13B,SLIT3,NR1D…
GO:BP	regulation of membrane potential	GO:0042391	2.9921e-05	4.52403	424	505	32	21092	APP,ATP1A3,DLD,PRKN,ANK2,GRIA3,GABRA2,GRM1,GRIN2B,UNC13B,CALM3,GRIN2D,GABRA4,PID1,SCN8A,RIMS2,SUMO1,ZMPSTE24,KMT2A,WDR1,HCN1,GABRG2,INSYN2A,RYR2,KCNA2,ATP1A1,CACNA1I,LRRK2,RIMS1,CACNG2,GRIA1,SCN5A
GO:BP	negative regulation of cellular process	GO:0048523	3.5015e-05	4.45574	4749	505	168	21092	ZIC2,MLH1,APP,PRKN,TARDBP,ANK2,FER,JAZF1,SLC25A12,GBE1,USP9X,SOX6,IRS1,DLC1,TERC,NR2F2,SF1,THOC2,PABPC1,ROBO2,PDE4D,ABL2,NUMB,TIAL1,CUX1,HNRNPK,PFDN5,STC1,XRCC5,PRKG1,ARID5B,NFIC,TRPC1,RBM14,GRIN2B,KAT6B,GAS1,SLIT3,NR1D1,MIB1,KDM2B,DUSP6,SMG6,DNAJB11,CCND3,OVOL2,KDM5A,URI1,FZD5,PIK3R3,CALM3,CTR9,SIN3A,ADIPOR1,POR,L3MBTL3,BCL7A,FTO,PID1,COPS2,PEG10,KLF9,PTBP3,CDC5L,BCL11B,EIF4E2,CCP110,SCYL2,DPF2,…
GO:BP	regulation of cellular component organization	GO:0051128	3.5872e-05	4.44524	2355	505	99	21092	APP,PRKN,FER,DLC1,SLITRK4,THOC2,ROBO2,ABL2,NUMB,CUX1,HNRNPK,PFDN5,XRCC5,CKAP5,RBM14,GRIN2B,UNC13B,SLIT3,MIB1,KDM2B,SMG6,ZMYND10,URI1,FZD5,CALM3,CTR9,KCTD17,SIN3A,TBC1D25,ADIPOR1,L3MBTL3,BCL7A,PLAA,PID1,STMP1,KIF20B,CDKL5,CCP110,SCYL2,DPF2,PPARGC1A,RIMS2,DYNC1H1,CDH8,INHBA,MAPK3,SNAI2,SSRP1,STXBP1,TGFB2,THBS1,SUMO1,CAPZB,MMP14,LMAN1,GPC6,TRIM28,ZMPSTE24,CCT3,RAD21,TSG101,RAB3GAP2,CLIC4,SCAF8,AAK1,…
GO:BP	positive regulation of cellular metabolic process	GO:0031325	4.0103e-05	4.39682	3094	505	121	21092	ZIC2,MLH1,APP,PRKN,CEP290,EPM2AIP1,TARDBP,UPF3B,ERCC8,SLC25A12,NFIA,USP9X,IRS1,DLC1,NR2F2,PABPC1,HNRNPK,ATF6,XRCC5,ARID5B,NFIC,RBM14,KAT6B,NR1D1,CCND3,OVOL2,KDM5A,LARP1B,CSRNP1,FZD5,PIK3R3,CALM3,ZNF287,CTR9,SIN3A,POR,RPS4X,SSBP3,BCL7A,FTO,DDX17,PID1,ZNF507,CDC5L,TFE3,BCL11B,DPF2,ETS1,PPARGC1A,GPBP1,ZNF112,ID4,CCND2,INHBA,ITGA5,MAPK3,MAPK7,TGFB2,THBS1,SUMO1,PLPP3,EIF3D,LCP2,TRIM28,KMT2A,CCT3,NSF,T…
GO:BP	positive regulation of cellular process	GO:0048522	6.1481e-05	4.21126	5641	505	191	21092	ZIC2,MLH1,APP,PRKN,CEP290,EPM2AIP1,TARDBP,ANK2,UPF3B,ERCC8,GPC5,FER,SLC25A12,NFIA,USP9X,GRM1,SOX6,IRS1,DLC1,NR2F2,SLITRK4,PABPC1,ROBO2,ABL2,NUMB,TIAL1,CUX1,HNRNPK,SOX5,ATF6,XRCC5,CKAP5,ARID5B,NFIC,TRPC1,RBM14,GRIN2B,KAT6B,UNC13B,NR1D1,MIB1,KDM2B,DUSP6,CCND3,UTRN,ZMYND10,OVOL2,KDM5A,LARP1B,CSRNP1,FZD5,PIK3R3,CALM3,ZNF287,CTR9,KCTD17,GRIN2D,SIN3A,ADIPOR1,POR,RPS4X,SSBP3,BCL7A,PLAA,FTO,DDX17,GPR137C…
GO:BP	positive regulation of biological process	GO:0048518	0.00013781	3.86073	6309	505	207	21092	ZIC2,MLH1,APP,PRKN,CEP290,EPM2AIP1,TARDBP,ANK2,UPF3B,ERCC8,GPC5,FER,SLC25A12,NFIA,USP9X,GRM1,SOX6,IRS1,DLC1,NR2F2,SLITRK4,PABPC1,FBXO33,ROBO2,PDE4D,ABL2,NUMB,TIAL1,CUX1,HNRNPK,SOX5,STC1,ATF6,XRCC5,CKAP5,ARID5B,NFIC,TRPC1,RBM14,GRIN2B,KAT6B,UNC13B,NR1D1,MIB1,KDM2B,DUSP6,CCND3,PSME2,UTRN,ZMYND10,OVOL2,KDM5A,LARP1B,CSRNP1,FZD5,PIK3R3,CALM3,ZNF287,CTR9,KCTD17,GRIN2D,SIN3A,ADIPOR1,POR,RPS4X,SSBP3,BCL7…
GO:BP	central nervous system development	GO:0007417	0.00017693	3.7522	1065	505	55	21092	ZIC2,APP,ATP1A3,PRKN,CEP290,SOX6,DLC1,NR2F2,PTCHD1,ROBO2,NUMB,GART,XRCC5,PRKG1,GRIN2B,NR1D1,KDM2B,CALM3,GRIN2D,SIN3A,SSBP3,SLC6A17,BCL11B,SCYL2,ATP2B2,ID4,ARCN1,INHBA,MAPK3,PLPP3,SYNGR3,STXBP3,WDR1,MACO1,UBA6,EIF2B3,TLX3,ZIC5,NCKAP1,ATM,PTPRG,ADGRL3,SEMA5A,PLXNA4,SPTBN2,TTBK2,KAT2A,EPHA7,BMPR1B,LRRK2,POU6F2,NPAS2,DIXDC1,DAB1,SCN5A
GO:BP	positive regulation of macromolecule biosynthetic process	GO:0010557	0.00023204	3.63443	1925	505	83	21092	ZIC2,APP,PRKN,CEP290,EPM2AIP1,UPF3B,NFIA,IRS1,NR2F2,PABPC1,HNRNPK,ATF6,XRCC5,ARID5B,NFIC,RBM14,KAT6B,NR1D1,OVOL2,KDM5A,LARP1B,CSRNP1,FZD5,ZNF287,SIN3A,RPS4X,SSBP3,DDX17,PID1,ZNF507,CDC5L,TFE3,BCL11B,DPF2,ETS1,PPARGC1A,GPBP1,ZNF112,ID4,INHBA,MAPK3,MAPK7,TGFB2,THBS1,EIF3D,TRIM28,KMT2A,CCT3,TSG101,SCAF8,KANSL2,PHIP,IMPACT,ENY2,ACTR5,MED10,MED30,LEO1,CREB3L2,NR6A1,COL1A1,TCF20,INO80D,KMT2C,ZNF225,ATM…
GO:BP	regulation of localization	GO:0032879	0.00025067	3.6009	2089	505	88	21092	APP,PRKN,CEP290,TARDBP,ANK2,GPC5,FER,IRS1,THOC2,PDE4D,ABL2,NUMB,HNRNPK,STC1,TRPC1,GRIN2B,GAS1,UNC13B,NR1D1,MIB1,UTRN,KCNA4,STX8,FZD5,SV2A,CALM3,GRIN2D,SIN3A,PLAA,FTO,PID1,RABGAP1L,KIF20B,SCYL2,SCN8A,GAPVD1,RIMS2,DYNC1H1,INHBA,MAPK3,STXBP1,TGFB2,THBS1,SUMO1,SYNGR3,MMP14,LMAN1,GPC6,TRIM28,KMT2A,CCT3,NSF,TSG101,LMAN2,SYN1,STXBP3,CLIC4,AAK1,DERL2,RAB10,HCN1,RINT1,TAMALIN,XPO4,PTPRC,RYR2,MKLN1,SAPCD2,…
GO:BP	positive regulation of cellular biosynthetic process	GO:0031328	0.00030108	3.52132	2033	505	86	21092	ZIC2,APP,PRKN,CEP290,EPM2AIP1,UPF3B,SLC25A12,NFIA,IRS1,NR2F2,PABPC1,HNRNPK,ATF6,XRCC5,ARID5B,NFIC,RBM14,KAT6B,NR1D1,OVOL2,KDM5A,LARP1B,CSRNP1,FZD5,ZNF287,SIN3A,POR,RPS4X,SSBP3,DDX17,PID1,ZNF507,CDC5L,TFE3,BCL11B,DPF2,ETS1,PPARGC1A,GPBP1,ZNF112,ID4,INHBA,MAPK3,MAPK7,TGFB2,THBS1,EIF3D,TRIM28,KMT2A,CCT3,TSG101,RAB3GAP2,SCAF8,KANSL2,PHIP,IMPACT,ENY2,ACTR5,MED10,MED30,LEO1,CREB3L2,NR6A1,COL1A1,TCF20,I…
GO:BP	positive regulation of biosynthetic process	GO:0009891	0.00032604	3.48673	2069	505	87	21092	ZIC2,APP,PRKN,CEP290,EPM2AIP1,UPF3B,SLC25A12,NFIA,IRS1,NR2F2,PABPC1,HNRNPK,ATF6,XRCC5,ARID5B,NFIC,RBM14,KAT6B,NR1D1,OVOL2,KDM5A,LARP1B,CSRNP1,FZD5,ZNF287,SIN3A,POR,RPS4X,SSBP3,DDX17,PID1,ZNF507,CDC5L,TFE3,BCL11B,DPF2,ETS1,PPARGC1A,GPBP1,ZNF112,ID4,INHBA,MAPK3,MAPK7,TGFB2,THBS1,EIF3D,TRIM28,KMT2A,CCT3,TSG101,RAB3GAP2,SCAF8,KANSL2,PHIP,IMPACT,ENY2,ACTR5,MED10,MED30,LEO1,CREB3L2,NR6A1,COL1A1,TCF20,I…
GO:BP	cell morphogenesis	GO:0000902	0.00035008	3.45584	1030	505	53	21092	APP,PRKN,FER,USP9X,DLC1,SLITRK4,THOC2,ROBO2,NUMB,CUX1,STC1,ALCAM,NCAM1,SLIT3,PAK6,SIN3A,ANOS1,PLAA,BCL11B,KIF20B,CDKL5,FGD4,RIMS2,CDH8,STXBP1,TGFB2,TMEFF1,CAPZB,ZMPSTE24,CDH10,CLIC4,RAB10,WDR1,PHIP,FGD6,IMPACT,LRATD1,NCKAP1,MKLN1,CDH24,EFNA5,SEMA5A,PLXNA4,EPHA7,BRAF,CRB1,BMPR1B,LRRK2,RIMS1,DIXDC1,DAB1,SEMA3G,ZFPM1
GO:BP	positive regulation of nucleobase-containing compound metabolic process	GO:0045935	0.00041479	3.38218	2048	505	86	21092	ZIC2,MLH1,APP,PRKN,CEP290,TARDBP,ERCC8,SLC25A12,NFIA,USP9X,NR2F2,PABPC1,HNRNPK,ATF6,XRCC5,ARID5B,NFIC,RBM14,KAT6B,NR1D1,OVOL2,KDM5A,CSRNP1,FZD5,ZNF287,SIN3A,SSBP3,BCL7A,FTO,DDX17,PID1,ZNF507,CDC5L,TFE3,BCL11B,DPF2,ETS1,PPARGC1A,GPBP1,ZNF112,ID4,INHBA,MAPK3,MAPK7,TGFB2,TRIM28,KMT2A,CCT3,TSG101,SCAF8,KANSL2,PHIP,ENY2,ACTR5,MED10,SLX4,MED30,LEO1,BABAM2,CREB3L2,NR6A1,COL1A1,TCF20,PTPRC,INO80D,KMT2C,Z…
GO:BP	neurogenesis	GO:0022008	0.00057119	3.24322	1680	505	74	21092	APP,PRKN,CEP290,USP9X,SOX6,NR2F2,SLITRK4,THOC2,ROBO2,ABL2,NUMB,CUX1,SOX5,ALCAM,XRCC5,PRKG1,NCAM1,SLIT3,NR1D1,PAK6,MIB1,DNAJB11,FZD5,SIN3A,ANOS1,PLAA,COPS2,BCL11B,KIF20B,CDKL5,SCYL2,ATP2B2,RIMS2,ID4,INHBA,MAPK3,STXBP1,TGFB2,TMEFF1,PLPP3,ARL3,MMP14,SYN1,RAB10,WDR1,UBA6,IMPACT,EIF2B3,SH3RF1,TLX3,HCN1,DNAAF4,NCKAP1,CREB3L2,TRIM67,LRIG2,PPP2R3A,PTPRG,ADGRL3,REST,EFNA5,SEMA5A,PLXNA4,CPEB3,EPHA7,BRAF,CR…
GO:BP	regulation of transport	GO:0051049	0.00067019	3.1738	1750	505	76	21092	APP,PRKN,CEP290,TARDBP,ANK2,FER,IRS1,THOC2,PDE4D,ABL2,NUMB,HNRNPK,STC1,TRPC1,GRIN2B,GAS1,UNC13B,NR1D1,MIB1,UTRN,KCNA4,FZD5,SV2A,CALM3,GRIN2D,PLAA,PID1,KIF20B,SCYL2,SCN8A,GAPVD1,RIMS2,DYNC1H1,INHBA,MAPK3,STXBP1,TGFB2,THBS1,SUMO1,SYNGR3,LMAN1,TRIM28,KMT2A,NSF,TSG101,LMAN2,SYN1,STXBP3,CLIC4,AAK1,DERL2,RAB10,HCN1,RINT1,TAMALIN,XPO4,PTPRC,RYR2,MKLN1,KCNA2,ATP1A1,REST,EFNA5,CACNA1I,HUWE1,PCLO,BRAF,DISP…
GO:BP	regulation of metabolic process	GO:0019222	0.00071609	3.14503	7377	505	231	21092	ZIC2,MLH1,APP,PRKN,CEP290,EPM2AIP1,TARDBP,ANK2,UPF3B,ERCC8,FER,JAZF1,SLC25A12,NFIA,USP9X,SOX6,IRS1,DLC1,TERC,NR2F2,HDX,SF1,THOC2,PABPC1,FBXO33,PDE4D,ABL2,TIAL1,SP8,CUX1,HNRNPK,SOX5,PFDN5,ATF6,XRCC5,ARID5B,NFIC,RBM14,GRIN2B,TSHZ1,KAT6B,GAS1,SLIT3,NR1D1,PAK6,KDM2B,DUSP6,SMG6,CCND3,PSME2,OVOL2,KDM5A,ATP6V0A1,URI1,LARP1B,CSRNP1,FZD5,PIK3R3,CALM3,ZNF287,CTR9,AFF3,SIN3A,TBC1D25,ADIPOR1,ANOS1,POR,RPS4X,…
GO:BP	cellular macromolecule metabolic process	GO:0044260	0.0008643	3.06334	3234	505	120	21092	MLH1,APP,PRKN,EPM2AIP1,TARDBP,UPF3B,ERCC8,NFIA,GBE1,USP9X,RPS24,B3GALT2,HS6ST2,IRS1,TERC,PHKB,CDKAL1,PABPC1,FBXO33,XRCC5,NFIC,KLHL3,CAMKMT,NR1D1,MIB1,PCMT1,SMG6,HFM1,STT3B,VARS2,LARP1B,WDR26,GALNT14,CTR9,KCTD17,SIN3A,RPS4X,BCL7A,PLAA,FTO,CDC5L,BCL11B,EIF4E2,DPF2,POLA1,PPARGC1A,INHBA,MAPK3,PSMD11,PSMD12,SSRP1,THBS1,TOP1,SUMO1,CUL1,DENR,EIF3D,PIGK,TRIM28,ZMPSTE24,MCM6,KMT2A,CCT3,NSF,RAD21,TSG101,FB…
GO:BP	brain development	GO:0007420	0.00092608	3.03335	780	505	43	21092	ZIC2,APP,ATP1A3,CEP290,SOX6,DLC1,NR2F2,PTCHD1,ROBO2,NUMB,GART,XRCC5,PRKG1,GRIN2B,KDM2B,CALM3,GRIN2D,SIN3A,SSBP3,SLC6A17,BCL11B,SCYL2,ATP2B2,ID4,ARCN1,INHBA,SYNGR3,STXBP3,MACO1,UBA6,ATM,PTPRG,ADGRL3,SEMA5A,PLXNA4,SPTBN2,TTBK2,KAT2A,EPHA7,LRRK2,DIXDC1,DAB1,SCN5A
GO:BP	organonitrogen compound metabolic process	GO:1901564	0.00127173	2.89561	6522	505	208	21092	ETFA,MLH1,APP,DLD,PRKN,TARDBP,DPYD,UPF3B,ERCC8,FER,SLC25A12,USP9X,RPS24,B3GALT2,HS6ST2,NDUFV2,DLC1,HLCS,PHKB,NR2F2,CDKAL1,PABPC1,FBXO33,PDE4D,ABL2,KDSR,GART,PFDN5,ATF6,XRCC5,CHST1,PRKG1,RBM14,GRIN2B,KAT6B,KLHL3,GAS1,CAMKMT,NR1D1,PAK6,MIB1,KDM2B,DUSP6,PCMT1,DNAJB11,STT3B,VARS2,NADK2,CCND3,PSME2,NDUFA8,KDM5A,LARP1B,WDR26,FZD5,PIK3R3,GALNT14,KLHL9,CALM3,CTR9,KCTD17,SIN3A,FAH,FUCA1,ANOS1,BLVRB,POR,AT…
GO:BP	regulation of macromolecule metabolic process	GO:0060255	0.00139734	2.8547	6842	505	216	21092	ZIC2,MLH1,APP,PRKN,CEP290,EPM2AIP1,TARDBP,ANK2,UPF3B,ERCC8,FER,JAZF1,NFIA,USP9X,SOX6,IRS1,DLC1,NR2F2,HDX,SF1,THOC2,PABPC1,FBXO33,PDE4D,TIAL1,SP8,CUX1,HNRNPK,SOX5,PFDN5,ATF6,XRCC5,ARID5B,NFIC,RBM14,GRIN2B,TSHZ1,KAT6B,GAS1,SLIT3,NR1D1,PAK6,KDM2B,DUSP6,SMG6,CCND3,PSME2,OVOL2,KDM5A,URI1,LARP1B,CSRNP1,FZD5,PIK3R3,CALM3,ZNF287,CTR9,AFF3,SIN3A,ANOS1,POR,RPS4X,L3MBTL3,SSBP3,BCL7A,PLAA,FTO,DDX17,PID1,STMP…
GO:BP	regulation of biological quality	GO:0065008	0.00144053	2.84148	3726	505	133	21092	MLH1,APP,ATP1A3,DLD,PRKN,TARDBP,ANK2,GRIA3,FER,USP9X,RPS24,GABRA2,GRM1,IRS1,NR2F2,SLITRK4,PABPC1,ROBO2,PDE4D,ABL2,NUMB,PFDN5,STC1,PRKG1,TRPC1,GRIN2B,KLHL3,UNC13B,NR1D1,VARS2,ATP6V0A1,URI1,SV2A,CALM3,KCTD17,GRIN2D,SIN3A,ADIPOR1,GABRA4,POR,L3MBTL3,PLAA,FTO,PID1,PTBP3,TFE3,CDKL5,SCN8A,ETS1,ATP2B2,PPARGC1A,RIMS2,DYNC1H1,CDH8,GOT1,INHBA,PCSK2,MAPK3,STXBP1,THBS1,TPP2,SUMO1,PLPP3,SYNGR3,XPR1,CAPZB,LMAN1…
GO:BP	protein metabolic process	GO:0019538	0.00152008	2.81813	5462	505	180	21092	MLH1,APP,DLD,PRKN,TARDBP,UPF3B,ERCC8,FER,USP9X,RPS24,B3GALT2,HS6ST2,DLC1,HLCS,PHKB,NR2F2,CDKAL1,PABPC1,FBXO33,PDE4D,ABL2,PFDN5,ATF6,XRCC5,PRKG1,RBM14,GRIN2B,KAT6B,KLHL3,GAS1,CAMKMT,NR1D1,PAK6,MIB1,KDM2B,DUSP6,PCMT1,DNAJB11,STT3B,VARS2,CCND3,PSME2,KDM5A,LARP1B,WDR26,FZD5,PIK3R3,GALNT14,KLHL9,CALM3,CTR9,KCTD17,SIN3A,ANOS1,POR,RPS4X,PLAA,FTO,PID1,HECTD4,COPS2,UBE2QL1,EIF4E2,CDKL5,SCYL2,PPARGC1A,CCND…
GO:BP	generation of neurons	GO:0048699	0.00266986	2.57351	1465	505	65	21092	APP,PRKN,CEP290,USP9X,NR2F2,SLITRK4,THOC2,ROBO2,ABL2,NUMB,CUX1,SOX5,ALCAM,PRKG1,NCAM1,SLIT3,PAK6,MIB1,FZD5,SIN3A,ANOS1,PLAA,COPS2,BCL11B,KIF20B,CDKL5,SCYL2,ATP2B2,RIMS2,ID4,INHBA,STXBP1,TGFB2,TMEFF1,ARL3,SYN1,RAB10,UBA6,IMPACT,SH3RF1,TLX3,HCN1,DNAAF4,NCKAP1,CREB3L2,TRIM67,LRIG2,PPP2R3A,PTPRG,ADGRL3,REST,EFNA5,SEMA5A,PLXNA4,CPEB3,EPHA7,BRAF,CRB1,BMPR1B,LRRK2,RIMS1,DIXDC1,DAB1,ONECUT2,SEMA3G
GO:BP	cellular developmental process	GO:0048869	0.00285002	2.54515	4280	505	147	21092	ZIC2,MLH1,APP,DLD,PRKN,CEP290,ANK2,FER,USP9X,SOX6,NR2F2,NEBL,SLITRK4,SF1,THOC2,ROBO2,PDE4D,ABL2,NUMB,TIAL1,CUX1,SOX5,STC1,ALCAM,XRCC5,PRKG1,ARID5B,NCAM1,GAS1,SLIT3,NR1D1,PAK6,MIB1,DUSP6,DNAJB11,COL12A1,OVOL2,FZD5,PIK3R3,CTR9,SIN3A,ADIPOR1,ANOS1,POR,L3MBTL3,SSBP3,BCL7A,PLAA,FTO,DDX17,KIF2A,PID1,COPS2,PEG10,PTBP3,TFE3,BCL11B,KIF20B,CDKL5,SCYL2,DPF2,ETS1,ATP2B2,PPARGC1A,RIMS2,ID4,INHBA,ITGA5,MAPK3,M…
GO:BP	cell differentiation	GO:0030154	0.00339339	2.46937	4256	505	146	21092	ZIC2,MLH1,APP,DLD,PRKN,CEP290,ANK2,FER,USP9X,SOX6,NR2F2,NEBL,SLITRK4,SF1,THOC2,ROBO2,PDE4D,ABL2,NUMB,TIAL1,CUX1,SOX5,STC1,ALCAM,XRCC5,PRKG1,ARID5B,NCAM1,GAS1,SLIT3,NR1D1,PAK6,MIB1,DUSP6,DNAJB11,COL12A1,OVOL2,FZD5,PIK3R3,CTR9,SIN3A,ADIPOR1,ANOS1,POR,L3MBTL3,SSBP3,BCL7A,PLAA,FTO,DDX17,KIF2A,COPS2,PEG10,PTBP3,TFE3,BCL11B,KIF20B,CDKL5,SCYL2,DPF2,ETS1,ATP2B2,PPARGC1A,RIMS2,ID4,INHBA,ITGA5,MAPK3,MAPK7,…
GO:BP	multicellular organismal process	GO:0032501	0.00481496	2.31741	7463	505	229	21092	ZIC2,MLH1,APP,ATP1A3,DLD,PRKN,CEP290,ANK2,FER,SLC25A12,NFIA,USP9X,GABRA2,GRM1,SOX6,NDUFV2,DLC1,NR2F2,NEBL,PTCHD1,SLITRK4,SF1,THOC2,ROBO2,PDE4D,SOBP,ABL2,NUMB,GART,CALD1,TIAL1,SP8,CUX1,HNRNPK,SOX5,PFDN5,STC1,ALCAM,ATF6,XRCC5,SMTN,PRKG1,ARID5B,TRPC1,GRIN2B,NCAM1,TSHZ1,KAT6B,KLHL3,UNC13B,SLIT3,NR1D1,PAK6,MIB1,KDM2B,DUSP6,DNAJB11,COL12A1,UTRN,OVOL2,KDM5A,CSRNP1,FZD5,PIK3R3,CALM3,ZNF287,CTR9,GRIN2D,AF…
GO:BP	animal organ morphogenesis	GO:0009887	0.00527848	2.27749	1066	505	51	21092	CEP290,SOX6,DLC1,ROBO2,SOBP,SOX5,STC1,ARID5B,PRICKLE2,TSHZ1,KLHL3,SLIT3,MIB1,KDM2B,OVOL2,CSRNP1,FZD5,POR,BCL11B,CELSR3,ID4,INHBA,MAPK3,HTRA1,SNAI2,TGFB2,CUL1,TMEFF1,MMP14,DLX6,GPC6,ZMPSTE24,MMP16,HS2ST1,HCN1,RELT,COL1A1,RYR2,SAPCD2,PPP2R3A,ASXL3,SMAD6,BRAF,CRB1,BMPR1B,LRRK2,WDR48,FOXN3,ONECUT2,SCN5A,ZFPM1
GO:BP	catabolic process	GO:0009056	0.0057714	2.23872	2587	505	98	21092	ETFA,MLH1,APP,DLD,PRKN,TARDBP,DPYD,UPF3B,ERCC8,SLC25A12,USP9X,IRS1,ACAA1,PABPC1,FBXO33,PDE4D,ABL2,ATF6,KLHL3,LRBA,NR1D1,MIB1,SMG6,STT3B,PSME2,ATP6V0A1,WDR26,FZD5,ATG2B,KCTD17,TBC1D25,FAH,FUCA1,HADHA,BLVRB,POR,PLAA,FTO,INPP4B,GALE,ATP6V1C1,CTSC,GOT1,GOT2,PGAM1,PGM1,MAPK3,PSMD11,PSMD12,SUMO1,CUL1,SUCLG2,MMP14,ZMPSTE24,MMP16,NSF,TSG101,FBXL3,RAB3GAP2,CCDC22,PPP1R8,EDC4,SND1,PIK3R4,DERL2,PIAS1,TENT5A…
GO:BP	positive regulation of RNA metabolic process	GO:0051254	0.00916198	2.03801	1842	505	75	21092	ZIC2,MLH1,APP,PRKN,CEP290,TARDBP,NFIA,NR2F2,PABPC1,HNRNPK,ATF6,ARID5B,NFIC,RBM14,KAT6B,NR1D1,OVOL2,KDM5A,CSRNP1,FZD5,ZNF287,SIN3A,SSBP3,FTO,DDX17,PID1,ZNF507,CDC5L,TFE3,BCL11B,DPF2,ETS1,PPARGC1A,GPBP1,ZNF112,ID4,INHBA,MAPK3,MAPK7,TGFB2,TRIM28,KMT2A,TSG101,SCAF8,KANSL2,PHIP,ENY2,ACTR5,MED10,MED30,LEO1,CREB3L2,NR6A1,COL1A1,TCF20,INO80D,KMT2C,ZNF225,ATM,USF3,REST,MYBL1,ZNF658,CPEB3,ZFP90,KAT2A,ASXL3…
GO:BP	cellular process	GO:0009987	0.0113871	1.94359	19221	505	486	21092	ETFA,ZIC2,MLH1,APP,ATP1A3,DLD,SIL1,PRCC,PRKN,CEP290,EPM2AIP1,PEX3,TARDBP,DPYD,ANK2,UPF3B,ERCC8,GPC5,GRIA3,FER,JAZF1,SLC25A12,NFIA,GBE1,USP9X,RPS24,B3GALT2,GABRA2,GRM1,HS6ST2,SOX6,NDUFV2,IRS1,DLC1,HLCS,PIN4,TERC,PHKB,NR2F2,NEBL,HDX,CDKAL1,PTCHD1,SLITRK4,SF1,THOC2,ACAA1,PABPC1,FBXO33,ROBO2,PDE4D,ARHGEF12,ABL2,KDSR,NUMB,GART,CALD1,TIAL1,SP8,CUX1,HNRNPK,SOX5,PFDN5,STC1,ALCAM,ATF6,XRCC5,CHST1,SMTN,CKA…
GO:BP	regulation of postsynaptic membrane potential	GO:0060078	0.011483	1.93994	135	505	14	21092	APP,GRIA3,GABRA2,GRM1,GRIN2B,UNC13B,GRIN2D,GABRA4,RIMS2,GABRG2,INSYN2A,LRRK2,RIMS1,GRIA1
GO:BP	developmental growth involved in morphogenesis	GO:0060560	0.0119573	1.92237	237	505	19	21092	APP,PRKN,USP9X,ALCAM,SLIT3,PAK6,SIN3A,PLAA,CDKL5,RIMS2,TRIM28,IMPACT,PPP2R3A,EFNA5,SEMA5A,PLXNA4,EPHA7,RIMS1,SEMA3G
GO:BP	rhythmic process	GO:0048511	0.0128867	1.88986	306	505	22	21092	TARDBP,USP9X,ROBO2,SLIT3,NR1D1,KDM5A,SIN3A,KLF9,PPARGC1A,ID4,INHBA,TGFB2,TOP1,KMT2A,FBXL3,PHLPP1,KCNA2,USP2,HUWE1,BMPR1B,NPAS2,NCOR1
GO:BP	cellular response to endogenous stimulus	GO:0071495	0.0134242	1.87211	1348	505	59	21092	APP,ATP1A3,PRKN,FER,USP9X,SOX6,IRS1,ROBO2,PDE4D,SOX5,STC1,SLIT3,NR1D1,CCND3,OVOL2,URI1,PIK3R3,SIN3A,ADIPOR1,POR,DDX17,PID1,PEG10,KLF9,GOT1,INHBA,MAPK3,MAPK7,HTRA1,SNAI2,TGFB2,THBS1,SAP30,ZMPSTE24,LEMD3,RAB10,PHIP,IMPACT,HCN1,SLX4,DNAAF4,GABRG2,COL1A1,RYR2,LTBP2,ATP1A1,REST,EFNA5,CPEB3,KAT2A,SMAD6,FLT3,BMPR1B,LRRK2,ACACA,LMO3,NCOR1,ONECUT2,PDXP
GO:BP	organic substance catabolic process	GO:1901575	0.0135966	1.86657	2128	505	83	21092	ETFA,MLH1,APP,DLD,PRKN,TARDBP,DPYD,UPF3B,ERCC8,SLC25A12,USP9X,IRS1,ACAA1,PABPC1,FBXO33,PDE4D,ATF6,KLHL3,NR1D1,MIB1,SMG6,STT3B,PSME2,WDR26,KCTD17,FAH,FUCA1,HADHA,BLVRB,PLAA,FTO,INPP4B,GALE,CTSC,GOT1,GOT2,PGAM1,PGM1,PSMD11,PSMD12,SUMO1,CUL1,SUCLG2,ZMPSTE24,NSF,TSG101,FBXL3,CCDC22,PPP1R8,EDC4,SND1,PIK3R4,DERL2,PIAS1,TENT5A,PNRC2,UBA6,UBE2W,KCTD5,ENTPD7,RCN3,SH3RF1,DNAAF4,OTUD7A,HIBADH,ATM,TRIM67,LRI…
GO:BP	regulation of gene expression	GO:0010468	0.0145539	1.83702	5494	505	176	21092	ZIC2,MLH1,APP,PRKN,CEP290,TARDBP,ANK2,UPF3B,FER,JAZF1,NFIA,USP9X,SOX6,NR2F2,HDX,SF1,THOC2,PABPC1,PDE4D,TIAL1,SP8,CUX1,HNRNPK,SOX5,PFDN5,ATF6,XRCC5,ARID5B,NFIC,RBM14,TSHZ1,KAT6B,GAS1,SLIT3,NR1D1,PAK6,KDM2B,SMG6,CCND3,OVOL2,KDM5A,URI1,LARP1B,CSRNP1,FZD5,PIK3R3,ZNF287,CTR9,AFF3,SIN3A,RPS4X,L3MBTL3,SSBP3,BCL7A,FTO,DDX17,PID1,STMP1,ZNF507,COPS2,SP9,KLF9,PTBP3,CDC5L,TFE3,BCL11B,EIF4E2,ZNF618,DPF2,POLA1…
GO:BP	positive regulation of nucleic acid-templated transcription	GO:1903508	0.0146967	1.83278	1703	505	70	21092	ZIC2,APP,PRKN,CEP290,NFIA,NR2F2,HNRNPK,ATF6,ARID5B,NFIC,RBM14,KAT6B,NR1D1,OVOL2,KDM5A,CSRNP1,FZD5,ZNF287,SIN3A,SSBP3,DDX17,PID1,ZNF507,CDC5L,TFE3,BCL11B,DPF2,ETS1,PPARGC1A,GPBP1,ZNF112,ID4,INHBA,MAPK3,MAPK7,TGFB2,TRIM28,KMT2A,TSG101,SCAF8,KANSL2,PHIP,ENY2,ACTR5,MED10,MED30,LEO1,CREB3L2,NR6A1,COL1A1,TCF20,INO80D,KMT2C,ZNF225,ATM,USF3,REST,MYBL1,ZNF658,ZFP90,KAT2A,ASXL3,SMAD6,BMPR1B,MBTPS2,NPAS2,AR…
GO:BP	positive regulation of DNA-templated transcription	GO:0045893	0.0146967	1.83278	1703	505	70	21092	ZIC2,APP,PRKN,CEP290,NFIA,NR2F2,HNRNPK,ATF6,ARID5B,NFIC,RBM14,KAT6B,NR1D1,OVOL2,KDM5A,CSRNP1,FZD5,ZNF287,SIN3A,SSBP3,DDX17,PID1,ZNF507,CDC5L,TFE3,BCL11B,DPF2,ETS1,PPARGC1A,GPBP1,ZNF112,ID4,INHBA,MAPK3,MAPK7,TGFB2,TRIM28,KMT2A,TSG101,SCAF8,KANSL2,PHIP,ENY2,ACTR5,MED10,MED30,LEO1,CREB3L2,NR6A1,COL1A1,TCF20,INO80D,KMT2C,ZNF225,ATM,USF3,REST,MYBL1,ZNF658,ZFP90,KAT2A,ASXL3,SMAD6,BMPR1B,MBTPS2,NPAS2,AR…
GO:BP	positive regulation of RNA biosynthetic process	GO:1902680	0.0165592	1.78096	1709	505	70	21092	ZIC2,APP,PRKN,CEP290,NFIA,NR2F2,HNRNPK,ATF6,ARID5B,NFIC,RBM14,KAT6B,NR1D1,OVOL2,KDM5A,CSRNP1,FZD5,ZNF287,SIN3A,SSBP3,DDX17,PID1,ZNF507,CDC5L,TFE3,BCL11B,DPF2,ETS1,PPARGC1A,GPBP1,ZNF112,ID4,INHBA,MAPK3,MAPK7,TGFB2,TRIM28,KMT2A,TSG101,SCAF8,KANSL2,PHIP,ENY2,ACTR5,MED10,MED30,LEO1,CREB3L2,NR6A1,COL1A1,TCF20,INO80D,KMT2C,ZNF225,ATM,USF3,REST,MYBL1,ZNF658,ZFP90,KAT2A,ASXL3,SMAD6,BMPR1B,MBTPS2,NPAS2,AR…
GO:BP	developmental growth	GO:0048589	0.0170093	1.76931	646	505	35	21092	APP,PRKN,USP9X,STC1,ALCAM,ARID5B,GAS1,SLIT3,PAK6,DUSP6,CTR9,SIN3A,POR,PLAA,FTO,COPS2,CDKL5,RIMS2,TGFB2,TRIM28,ZMPSTE24,CLIC4,IMPACT,ATM,PPP2R3A,EFNA5,SEMA5A,PLXNA4,SPTBN2,KAT2A,EPHA7,BMPR1B,RIMS1,WDR48,SEMA3G
GO:BP	neuron differentiation	GO:0030182	0.0181749	1.74053	1393	505	60	21092	APP,PRKN,CEP290,USP9X,SLITRK4,THOC2,ROBO2,ABL2,NUMB,CUX1,ALCAM,PRKG1,NCAM1,SLIT3,PAK6,MIB1,FZD5,SIN3A,ANOS1,PLAA,COPS2,BCL11B,KIF20B,CDKL5,SCYL2,ATP2B2,RIMS2,ID4,INHBA,STXBP1,TGFB2,TMEFF1,ARL3,SYN1,RAB10,UBA6,IMPACT,TLX3,HCN1,NCKAP1,CREB3L2,TRIM67,LRIG2,PPP2R3A,PTPRG,REST,EFNA5,SEMA5A,PLXNA4,CPEB3,EPHA7,BRAF,CRB1,BMPR1B,LRRK2,RIMS1,DIXDC1,DAB1,ONECUT2,SEMA3G
GO:BP	response to endogenous stimulus	GO:0009719	0.0213029	1.67156	1592	505	66	21092	APP,ATP1A3,PRKN,EPM2AIP1,FER,USP9X,SOX6,IRS1,ROBO2,PDE4D,SOX5,STC1,RBM14,SLIT3,NR1D1,CCND3,OVOL2,URI1,PIK3R3,CALM3,SIN3A,ADIPOR1,HADHA,POR,DDX17,PID1,PEG10,KLF9,GOT1,INHBA,MAPK3,MAPK7,HTRA1,SNAI2,TGFB2,THBS1,SAP30,MMP14,ZMPSTE24,STXBP3,LEMD3,RAB10,PHIP,IMPACT,EIF2B3,HCN1,SLX4,DNAAF4,GABRG2,COL1A1,RYR2,LTBP2,ATP1A1,REST,EFNA5,CPEB3,KAT2A,SMAD6,FLT3,BMPR1B,LRRK2,ACACA,LMO3,NCOR1,ONECUT2,PDXP
GO:BP	vesicle-mediated transport	GO:0016192	0.0215993	1.66556	1625	505	67	21092	APP,PRKN,ANK2,FER,ABL2,NUMB,CUX1,HNRNPK,GAS1,UNC13B,MIB1,VPS45,STX8,SV2A,CALM3,PLAA,PEG10,RABGAP1L,PITPNB,SCYL2,GAPVD1,RIMS2,ARCN1,MAPK3,STXBP1,THBS1,PLPP3,SYNGR3,ARL3,LMAN1,ACTR1A,BET1,NSF,TSG101,SEC23A,LMAN2,SYN1,STXBP3,CCDC22,PIK3R4,AAK1,RAB10,LIN7C,RINT1,AP5B1,STX12,TAMALIN,CREB3L2,DENND1B,PTPRC,MKLN1,TBC1D8B,PEAR1,AP5M1,REST,SPTBN2,CACNA1I,PCLO,DOP1B,BRAF,LRRK2,RIMS1,TRAPPC1,CACNG2,WDR81,GRI…
GO:BP	cellular catabolic process	GO:0044248	0.0217722	1.6621	2121	505	82	21092	ETFA,MLH1,APP,DLD,PRKN,TARDBP,DPYD,UPF3B,ERCC8,USP9X,IRS1,ACAA1,PABPC1,FBXO33,PDE4D,ABL2,ATF6,KLHL3,LRBA,MIB1,SMG6,STT3B,ATP6V0A1,WDR26,FZD5,ATG2B,KCTD17,TBC1D25,FAH,FUCA1,HADHA,BLVRB,POR,PLAA,FTO,ATP6V1C1,GOT1,GOT2,PGAM1,MAPK3,PSMD11,PSMD12,SUMO1,CUL1,SUCLG2,ZMPSTE24,TSG101,FBXL3,RAB3GAP2,CCDC22,PPP1R8,EDC4,SND1,PIK3R4,DERL2,PIAS1,TENT5A,PNRC2,UBA6,UBE2W,KCTD5,ENTPD7,SH3RF1,OTUD7A,HIBADH,STX12,R…
GO:BP	neuron development	GO:0048666	0.0221274	1.65507	1122	505	51	21092	APP,PRKN,CEP290,USP9X,SLITRK4,THOC2,ROBO2,ABL2,NUMB,CUX1,ALCAM,PRKG1,NCAM1,SLIT3,PAK6,SIN3A,ANOS1,PLAA,BCL11B,KIF20B,CDKL5,SCYL2,RIMS2,STXBP1,TGFB2,TMEFF1,ARL3,SYN1,RAB10,UBA6,IMPACT,HCN1,NCKAP1,CREB3L2,TRIM67,LRIG2,PTPRG,EFNA5,SEMA5A,PLXNA4,CPEB3,EPHA7,BRAF,CRB1,BMPR1B,LRRK2,RIMS1,DIXDC1,DAB1,ONECUT2,SEMA3G
GO:BP	neuron projection morphogenesis	GO:0048812	0.0267335	1.57294	632	505	34	21092	APP,PRKN,USP9X,SLITRK4,ROBO2,NUMB,CUX1,ALCAM,NCAM1,SLIT3,PAK6,SIN3A,ANOS1,PLAA,BCL11B,KIF20B,CDKL5,RIMS2,STXBP1,TMEFF1,RAB10,IMPACT,NCKAP1,EFNA5,SEMA5A,PLXNA4,EPHA7,BRAF,BMPR1B,LRRK2,RIMS1,DIXDC1,DAB1,SEMA3G
GO:BP	multicellular organismal signaling	GO:0035637	0.0267843	1.57212	165	505	15	21092	ATP1A3,ANK2,PDE4D,TRPC1,CALM3,SCN8A,ATP2B2,ZMPSTE24,HCN1,RYR2,KCNA2,ATP1A1,CACNA1I,CACNG2,SCN5A
GO:BP	embryo development	GO:0009790	0.0302585	1.51915	1135	505	51	21092	DLD,CEP290,DLC1,NR2F2,THOC2,SOBP,SP8,TSHZ1,MIB1,KDM2B,COL12A1,OVOL2,FZD5,CTR9,AFF3,SIN3A,SSBP3,COPS2,SP9,KIF20B,INHBA,ITGA5,MAPK3,MAPK7,TGFB2,TOP1,PLPP3,MMP14,DLX6,TRIM28,KMT2A,MMP16,HS2ST1,KIFBP,KAT14,LEO1,RAI2,COL1A1,RYR2,INO80D,ATM,PPP2R3A,PLXNA4,CMIP,KAT2A,DOP1B,SMAD6,DISP1,ARNT,WDR48,ZFPM1
GO:BP	cell development	GO:0048468	0.0313155	1.50424	2142	505	82	21092	MLH1,APP,DLD,PRKN,CEP290,ANK2,FER,USP9X,NEBL,SLITRK4,THOC2,ROBO2,PDE4D,ABL2,NUMB,TIAL1,CUX1,STC1,ALCAM,XRCC5,PRKG1,ARID5B,NCAM1,SLIT3,NR1D1,PAK6,DNAJB11,OVOL2,FZD5,SIN3A,ANOS1,L3MBTL3,PLAA,PTBP3,BCL11B,KIF20B,CDKL5,SCYL2,RIMS2,ID4,MAPK3,SNAI2,STXBP1,TGFB2,TMEFF1,ARL3,ZMPSTE24,SYN1,CLIC4,RAB10,WDR1,UBA6,IMPACT,SLC25A40,EIF2B3,HCN1,NCKAP1,CREB3L2,PTPRC,FASN,PANX1,ATM,TRIM67,LRIG2,PTPRG,REST,EFNA5,S…
GO:BP	cell part morphogenesis	GO:0032990	0.0382171	1.41774	671	505	35	21092	APP,PRKN,USP9X,SLITRK4,ROBO2,NUMB,CUX1,ALCAM,NCAM1,SLIT3,PAK6,SIN3A,ANOS1,PLAA,PID1,BCL11B,KIF20B,CDKL5,RIMS2,STXBP1,TMEFF1,RAB10,IMPACT,NCKAP1,EFNA5,SEMA5A,PLXNA4,EPHA7,BRAF,BMPR1B,LRRK2,RIMS1,DIXDC1,DAB1,SEMA3G
GO:BP	circadian rhythm	GO:0007623	0.0397777	1.40036	213	505	17	21092	TARDBP,USP9X,NR1D1,KDM5A,SIN3A,KLF9,PPARGC1A,ID4,TOP1,KMT2A,FBXL3,PHLPP1,KCNA2,USP2,HUWE1,NPAS2,NCOR1
GO:BP	neurotransmitter transport	GO:0006836	0.0397777	1.40036	213	505	17	21092	PRKN,GABRA2,UNC13B,SV2A,CALM3,SLC6A17,RIMS2,STXBP1,SYNGR3,SYN1,STXBP3,LIN7C,PCLO,BRAF,LRRK2,RIMS1,PNKD
GO:BP	regulation of developmental process	GO:0050793	0.0398246	1.39985	2499	505	92	21092	MLH1,APP,PRKN,SLC25A12,SOX6,DLC1,SLITRK4,ROBO2,NUMB,CUX1,SOX5,XRCC5,PRICKLE2,KAT6B,NR1D1,MIB1,KDM2B,DUSP6,DNAJB11,OVOL2,CTR9,SIN3A,ADIPOR1,POR,SSBP3,BCL7A,PLAA,FTO,DDX17,PID1,PTBP3,TFE3,BCL11B,CDKL5,DPF2,FGD4,ETS1,PPARGC1A,RIMS2,CELSR3,ID4,CTSC,INHBA,ITGA5,MAPK7,SNAI2,TGFB2,THBS1,SAP30,CAPZB,MMP14,GPC6,ZMPSTE24,SOS2,RCOR1,WDR1,TENT5A,PHIP,FGD6,IMPACT,KAT14,SH3RF1,TLX3,TMEM135,LEO1,COL1A1,PTPRC,MK…
GO:BP	signal release from synapse	GO:0099643	0.0419681	1.37708	151	505	14	21092	PRKN,UNC13B,SV2A,CALM3,RIMS2,STXBP1,SYN1,STXBP3,LIN7C,PCLO,BRAF,LRRK2,RIMS1,PNKD
GO:BP	neurotransmitter secretion	GO:0007269	0.0419681	1.37708	151	505	14	21092	PRKN,UNC13B,SV2A,CALM3,RIMS2,STXBP1,SYN1,STXBP3,LIN7C,PCLO,BRAF,LRRK2,RIMS1,PNKD
GO:BP	positive regulation of transcription by RNA polymerase II	GO:0045944	0.0426401	1.37018	1243	505	54	21092	APP,PRKN,NFIA,NR2F2,HNRNPK,ATF6,NFIC,RBM14,KAT6B,NR1D1,OVOL2,CSRNP1,FZD5,SIN3A,SSBP3,DDX17,PID1,ZNF507,CDC5L,TFE3,BCL11B,DPF2,ETS1,PPARGC1A,GPBP1,ZNF112,ID4,INHBA,MAPK3,MAPK7,KMT2A,PHIP,MED10,MED30,LEO1,CREB3L2,NR6A1,TCF20,KMT2C,ZNF225,ATM,USF3,REST,MYBL1,ZNF658,KAT2A,ASXL3,BMPR1B,MBTPS2,NPAS2,ARNT,ONECUT2,CREBRF,ZFPM1
GO:BP	plasma membrane bounded cell projection morphogenesis	GO:0120039	0.0434587	1.36192	647	505	34	21092	APP,PRKN,USP9X,SLITRK4,ROBO2,NUMB,CUX1,ALCAM,NCAM1,SLIT3,PAK6,SIN3A,ANOS1,PLAA,BCL11B,KIF20B,CDKL5,RIMS2,STXBP1,TMEFF1,RAB10,IMPACT,NCKAP1,EFNA5,SEMA5A,PLXNA4,EPHA7,BRAF,BMPR1B,LRRK2,RIMS1,DIXDC1,DAB1,SEMA3G
GO:BP	regulation of multicellular organismal process	GO:0051239	0.0463163	1.33427	2753	505	99	21092	MLH1,APP,ATP1A3,ANK2,SLC25A12,GRM1,SOX6,NR2F2,SLITRK4,ROBO2,PDE4D,NUMB,CUX1,HNRNPK,SOX5,STC1,XRCC5,PRKG1,TRPC1,GRIN2B,KAT6B,UNC13B,NR1D1,KDM2B,DUSP6,DNAJB11,OVOL2,FZD5,CALM3,ZNF287,CTR9,GRIN2D,SIN3A,ADIPOR1,POR,BCL7A,FTO,STMP1,TFE3,CDKL5,DPF2,POLA1,ETS1,ATP2B2,PPARGC1A,RIMS2,DYNC1H1,ID4,CTSC,INHBA,ITGA5,MAPK3,MAPK7,SNAI2,TGFB2,THBS1,SUMO1,PLPP3,SAP30,MMP14,ZMPSTE24,SOS2,RCOR1,TENT5A,KAT14,SH3RF1,…
GO:BP	cardiac conduction	GO:0061337	0.0468145	1.32962	96	505	11	21092	ATP1A3,ANK2,PDE4D,TRPC1,CALM3,ATP2B2,ZMPSTE24,HCN1,RYR2,ATP1A1,SCN5A

## Sheet: HCvApes_HIP_HC_Up
source	term_name	term_id	adjusted_p_value	negative_log10_of_adjusted_p_value	term_size	query_size	intersection_size	effective_domain_size	intersections
GO:BP	anatomical structure development	GO:0048856	2.47e-09	8.60797	5836	462	198	21092	ZIC2,MLH1,APP,ATP1A3,DLD,PRKN,CEP290,ANK2,FER,SLC25A12,NFIA,USP9X,GABRA2,SOX6,NDUFV2,DLC1,NR2F2,NEBL,PTCHD1,SLITRK4,SF1,THOC2,ROBO2,PDE4D,SOBP,ABL2,NUMB,GART,CALD1,TIAL1,SP8,CUX1,SOX5,PFDN5,STC1,ALCAM,ATF6,XRCC5,SMTN,PRKG1,ARID5B,GRIN2B,PRICKLE2,NCAM1,TSHZ1,KAT6B,KLHL3,SLIT3,NR1D1,PAK6,MIB1,KDM2B,DUSP6,DNAJB11,COL12A1,UTRN,OVOL2,CSRNP1,FZD5,PIK3R3,CALM3,CTR9,GRIN2D,AFF3,SIN3A,ADIPOR1,ANOS1,POR,L3…
GO:BP	developmental process	GO:0032502	4.63e-08	7.33402	6424	462	208	21092	ZIC2,MLH1,APP,ATP1A3,DLD,PRKN,CEP290,ANK2,FER,SLC25A12,NFIA,USP9X,GABRA2,SOX6,NDUFV2,DLC1,NR2F2,NEBL,PTCHD1,SLITRK4,SF1,THOC2,ROBO2,PDE4D,SOBP,ABL2,NUMB,GART,CALD1,TIAL1,SP8,CUX1,SOX5,PFDN5,STC1,ALCAM,ATF6,XRCC5,SMTN,PRKG1,ARID5B,GRIN2B,PRICKLE2,NCAM1,TSHZ1,KAT6B,KLHL3,GAS1,UNC13B,SLIT3,NR1D1,PAK6,MIB1,KDM2B,DUSP6,DNAJB11,COL12A1,UTRN,OVOL2,CSRNP1,FZD5,PIK3R3,CALM3,CTR9,GRIN2D,AFF3,SIN3A,ADIPOR1,…
GO:BP	nervous system development	GO:0007399	6.24e-08	7.20477	2504	462	105	21092	ZIC2,APP,ATP1A3,PRKN,CEP290,ANK2,SLC25A12,NFIA,USP9X,GABRA2,SOX6,NDUFV2,DLC1,NR2F2,PTCHD1,SLITRK4,THOC2,ROBO2,ABL2,NUMB,GART,CUX1,SOX5,ALCAM,XRCC5,PRKG1,GRIN2B,NCAM1,SLIT3,NR1D1,PAK6,MIB1,KDM2B,DNAJB11,OVOL2,FZD5,CALM3,GRIN2D,SIN3A,ANOS1,SSBP3,SLC6A17,PLAA,KIF2A,COPS2,BCL11B,KIF20B,CDKL5,SCYL2,SCN8A,DPF2,ATP2B2,RIMS2,ID4,ARCN1,CTSC,INHBA,PCSK2,MAPK3,STXBP1,TGFB2,TMEFF1,PLPP3,SYNGR3,ARL3,MYT1,MMP1…
GO:BP	macromolecule biosynthetic process	GO:0009059	2.93e-07	6.53387	4801	462	165	21092	ZIC2,MLH1,APP,PRKN,CEP290,EPM2AIP1,TARDBP,UPF3B,FER,JAZF1,NFIA,GBE1,USP9X,RPS24,B3GALT2,HS6ST2,SOX6,IRS1,TERC,NR2F2,HDX,CDKAL1,SF1,PABPC1,TIAL1,SP8,CUX1,HNRNPK,SOX5,PFDN5,ATF6,XRCC5,CHST1,ARID5B,NFIC,RBM14,TSHZ1,KAT6B,NR1D1,PAK6,KDM2B,SMG6,STT3B,VARS2,CCND3,OVOL2,KDM5A,URI1,LARP1B,CSRNP1,FZD5,GALNT14,ZNF287,CTR9,AFF3,SIN3A,POLR2A,RPS4X,L3MBTL3,SSBP3,BCL7A,FTO,DDX17,PID1,ZNF507,COPS2,SP9,KLF9,CDC5…
GO:BP	organic substance biosynthetic process	GO:1901576	6.58e-07	6.1816	5854	462	190	21092	ZIC2,MLH1,APP,DLD,PRKN,CEP290,EPM2AIP1,TARDBP,DPYD,UPF3B,FER,JAZF1,SLC25A12,NFIA,GBE1,USP9X,RPS24,B3GALT2,HS6ST2,SOX6,NDUFV2,IRS1,TERC,NR2F2,HDX,CDKAL1,SF1,PABPC1,KDSR,GART,TIAL1,SP8,CUX1,HNRNPK,SOX5,PFDN5,ATF6,XRCC5,CHST1,ARID5B,NFIC,TRPC1,RBM14,TSHZ1,KAT6B,NR1D1,PAK6,KDM2B,SMG6,STT3B,VARS2,NADK2,CCND3,NDUFA8,OVOL2,KDM5A,URI1,LARP1B,CSRNP1,FZD5,PIK3R3,GALNT14,ZNF287,CTR9,AFF3,SIN3A,POLR2A,POR,AT…
GO:BP	multicellular organism development	GO:0007275	8.11e-07	6.09091	4823	462	164	21092	ZIC2,MLH1,APP,ATP1A3,DLD,PRKN,CEP290,ANK2,FER,SLC25A12,NFIA,USP9X,GABRA2,SOX6,NDUFV2,DLC1,NR2F2,NEBL,PTCHD1,SLITRK4,SF1,THOC2,ROBO2,SOBP,ABL2,NUMB,GART,CALD1,SP8,CUX1,SOX5,PFDN5,STC1,ALCAM,ATF6,XRCC5,PRKG1,ARID5B,GRIN2B,NCAM1,TSHZ1,KAT6B,KLHL3,SLIT3,NR1D1,PAK6,MIB1,KDM2B,DUSP6,DNAJB11,COL12A1,OVOL2,CSRNP1,FZD5,PIK3R3,CALM3,CTR9,GRIN2D,AFF3,SIN3A,ANOS1,POR,L3MBTL3,SSBP3,SLC6A17,PLAA,KIF2A,COPS2,SP…
GO:BP	biosynthetic process	GO:0009058	1.3174e-06	5.88029	5941	462	191	21092	ZIC2,MLH1,APP,DLD,PRKN,CEP290,EPM2AIP1,TARDBP,DPYD,UPF3B,FER,JAZF1,SLC25A12,NFIA,GBE1,USP9X,RPS24,B3GALT2,HS6ST2,SOX6,NDUFV2,IRS1,TERC,NR2F2,HDX,CDKAL1,SF1,PABPC1,KDSR,GART,TIAL1,SP8,CUX1,HNRNPK,SOX5,PFDN5,ATF6,XRCC5,CHST1,ARID5B,NFIC,TRPC1,RBM14,TSHZ1,KAT6B,NR1D1,PAK6,KDM2B,SMG6,STT3B,VARS2,NADK2,CCND3,NDUFA8,OVOL2,KDM5A,URI1,LARP1B,CSRNP1,FZD5,PIK3R3,GALNT14,ZNF287,CTR9,AFF3,SIN3A,POLR2A,POR,AT…
GO:BP	cellular biosynthetic process	GO:0044249	1.4171e-06	5.84859	5782	462	187	21092	ZIC2,MLH1,APP,DLD,PRKN,CEP290,EPM2AIP1,TARDBP,DPYD,UPF3B,FER,JAZF1,SLC25A12,NFIA,GBE1,USP9X,RPS24,B3GALT2,HS6ST2,SOX6,NDUFV2,IRS1,TERC,NR2F2,HDX,CDKAL1,SF1,PABPC1,KDSR,GART,TIAL1,SP8,CUX1,HNRNPK,SOX5,PFDN5,ATF6,XRCC5,CHST1,ARID5B,NFIC,TRPC1,RBM14,TSHZ1,KAT6B,NR1D1,PAK6,KDM2B,SMG6,STT3B,VARS2,NADK2,CCND3,NDUFA8,OVOL2,KDM5A,URI1,LARP1B,CSRNP1,FZD5,PIK3R3,GALNT14,ZNF287,CTR9,AFF3,SIN3A,POLR2A,POR,AT…
GO:BP	anatomical structure morphogenesis	GO:0009653	1.7096e-06	5.76712	2722	462	107	21092	APP,DLD,PRKN,CEP290,ANK2,FER,USP9X,SOX6,DLC1,NR2F2,NEBL,SLITRK4,THOC2,ROBO2,SOBP,NUMB,CALD1,SP8,CUX1,SOX5,STC1,ALCAM,ARID5B,PRICKLE2,NCAM1,TSHZ1,KLHL3,SLIT3,PAK6,MIB1,KDM2B,COL12A1,OVOL2,CSRNP1,FZD5,PIK3R3,CTR9,AFF3,SIN3A,ANOS1,POR,SSBP3,PLAA,PID1,SP9,PTBP3,BCL11B,KIF20B,CDKL5,FGD4,ETS1,RIMS2,CELSR3,ID4,CDH8,INHBA,ITGA5,MAPK3,MAPK7,HTRA1,SNAI2,STXBP1,TGFB2,THBS1,CUL1,TMEFF1,PLPP3,CAPZB,MMP14,DLX6…
GO:BP	regulation of macromolecule biosynthetic process	GO:0010556	2.1696e-06	5.66362	3951	462	140	21092	ZIC2,MLH1,APP,PRKN,CEP290,EPM2AIP1,TARDBP,UPF3B,FER,JAZF1,NFIA,USP9X,SOX6,IRS1,NR2F2,HDX,SF1,PABPC1,TIAL1,SP8,CUX1,HNRNPK,SOX5,PFDN5,ATF6,XRCC5,ARID5B,NFIC,RBM14,TSHZ1,KAT6B,NR1D1,PAK6,KDM2B,SMG6,CCND3,OVOL2,KDM5A,URI1,LARP1B,CSRNP1,FZD5,ZNF287,CTR9,AFF3,SIN3A,RPS4X,L3MBTL3,SSBP3,BCL7A,FTO,DDX17,PID1,ZNF507,COPS2,SP9,KLF9,CDC5L,TFE3,BCL11B,EIF4E2,ZNF618,DPF2,INTS2,ETS1,ZNF569,PPARGC1A,GPBP1,ZNF38…
GO:BP	regulation of cellular biosynthetic process	GO:0031326	2.5775e-06	5.58879	4114	462	144	21092	ZIC2,MLH1,APP,PRKN,CEP290,EPM2AIP1,TARDBP,UPF3B,FER,JAZF1,SLC25A12,NFIA,USP9X,SOX6,IRS1,NR2F2,HDX,SF1,PABPC1,TIAL1,SP8,CUX1,HNRNPK,SOX5,PFDN5,ATF6,XRCC5,ARID5B,NFIC,RBM14,TSHZ1,KAT6B,NR1D1,PAK6,KDM2B,SMG6,CCND3,OVOL2,KDM5A,URI1,LARP1B,CSRNP1,FZD5,ZNF287,CTR9,AFF3,SIN3A,POR,RPS4X,L3MBTL3,SSBP3,BCL7A,FTO,DDX17,PID1,ZNF507,COPS2,SP9,KLF9,CDC5L,TFE3,BCL11B,EIF4E2,ZNF618,DPF2,INTS2,ETS1,ZNF569,PPARGC1…
GO:BP	regulation of primary metabolic process	GO:0080090	5.1058e-06	5.29193	5869	462	187	21092	ZIC2,MLH1,APP,PRKN,CEP290,EPM2AIP1,TARDBP,UPF3B,ERCC8,FER,JAZF1,SLC25A12,NFIA,USP9X,SOX6,IRS1,DLC1,NR2F2,HDX,SF1,PABPC1,FBXO33,PDE4D,TIAL1,SP8,CUX1,HNRNPK,SOX5,PFDN5,ATF6,XRCC5,ARID5B,NFIC,RBM14,GRIN2B,TSHZ1,KAT6B,GAS1,NR1D1,PAK6,KDM2B,DUSP6,SMG6,CCND3,PSME2,OVOL2,KDM5A,URI1,LARP1B,CSRNP1,FZD5,PIK3R3,CALM3,ZNF287,CTR9,AFF3,SIN3A,ADIPOR1,ANOS1,POR,RPS4X,L3MBTL3,SSBP3,BCL7A,PLAA,FTO,DDX17,PID1,ZNF5…
GO:BP	system development	GO:0048731	7.1509e-06	5.14564	4369	462	149	21092	ZIC2,MLH1,APP,ATP1A3,PRKN,CEP290,ANK2,FER,SLC25A12,NFIA,USP9X,GABRA2,SOX6,NDUFV2,DLC1,NR2F2,NEBL,PTCHD1,SLITRK4,SF1,THOC2,ROBO2,ABL2,NUMB,GART,CALD1,CUX1,SOX5,PFDN5,STC1,ALCAM,ATF6,XRCC5,PRKG1,ARID5B,GRIN2B,NCAM1,KAT6B,KLHL3,SLIT3,NR1D1,PAK6,MIB1,KDM2B,DUSP6,DNAJB11,OVOL2,CSRNP1,FZD5,PIK3R3,CALM3,CTR9,GRIN2D,SIN3A,ANOS1,POR,L3MBTL3,SSBP3,SLC6A17,PLAA,KIF2A,COPS2,PTBP3,TFE3,BCL11B,KIF20B,CDKL5,SCY…
GO:BP	regulation of biosynthetic process	GO:0009889	7.16e-06	5.14509	4175	462	144	21092	ZIC2,MLH1,APP,PRKN,CEP290,EPM2AIP1,TARDBP,UPF3B,FER,JAZF1,SLC25A12,NFIA,USP9X,SOX6,IRS1,NR2F2,HDX,SF1,PABPC1,TIAL1,SP8,CUX1,HNRNPK,SOX5,PFDN5,ATF6,XRCC5,ARID5B,NFIC,RBM14,TSHZ1,KAT6B,NR1D1,PAK6,KDM2B,SMG6,CCND3,OVOL2,KDM5A,URI1,LARP1B,CSRNP1,FZD5,ZNF287,CTR9,AFF3,SIN3A,POR,RPS4X,L3MBTL3,SSBP3,BCL7A,FTO,DDX17,PID1,ZNF507,COPS2,SP9,KLF9,CDC5L,TFE3,BCL11B,EIF4E2,ZNF618,DPF2,INTS2,ETS1,ZNF569,PPARGC1…
GO:BP	transcription by RNA polymerase II	GO:0006366	1.2357e-05	4.90808	2676	462	103	21092	ZIC2,APP,PRKN,JAZF1,NFIA,USP9X,SOX6,NR2F2,HDX,TIAL1,SP8,CUX1,HNRNPK,SOX5,ATF6,ARID5B,NFIC,RBM14,TSHZ1,KAT6B,NR1D1,KDM2B,CCND3,OVOL2,KDM5A,URI1,CSRNP1,FZD5,ZNF287,CTR9,SIN3A,POLR2A,SSBP3,BCL7A,DDX17,PID1,ZNF507,COPS2,SP9,KLF9,CDC5L,TFE3,BCL11B,DPF2,INTS2,ETS1,ZNF569,PPARGC1A,GPBP1,ZNF383,ZNF112,ID4,INHBA,MAPK3,MAPK7,SNAI2,ZNF134,SAP30,MYT1,DLX6,TRIM28,KMT2A,RAD21,TSG101,BRD3,SCAF8,RCOR1,RPAP1,PIAS…
GO:BP	regulation of transcription by RNA polymerase II	GO:0006357	1.3687e-05	4.8637	2574	462	100	21092	ZIC2,APP,PRKN,JAZF1,NFIA,USP9X,SOX6,NR2F2,HDX,TIAL1,SP8,CUX1,HNRNPK,SOX5,ATF6,ARID5B,NFIC,RBM14,TSHZ1,KAT6B,NR1D1,KDM2B,CCND3,OVOL2,KDM5A,URI1,CSRNP1,FZD5,ZNF287,CTR9,SIN3A,SSBP3,BCL7A,DDX17,PID1,ZNF507,COPS2,SP9,KLF9,CDC5L,TFE3,BCL11B,DPF2,ETS1,ZNF569,PPARGC1A,GPBP1,ZNF383,ZNF112,ID4,INHBA,MAPK3,MAPK7,SNAI2,ZNF134,SAP30,MYT1,DLX6,TRIM28,KMT2A,RAD21,TSG101,BRD3,SCAF8,RCOR1,PIAS1,PHIP,IMPACT,ENY2,…
GO:BP	regulation of cellular process	GO:0050794	1.5708e-05	4.80388	11130	462	304	21092	ZIC2,MLH1,APP,DLD,PRCC,PRKN,CEP290,EPM2AIP1,TARDBP,ANK2,UPF3B,ERCC8,GPC5,GRIA3,FER,JAZF1,SLC25A12,NFIA,GBE1,USP9X,GABRA2,GRM1,SOX6,IRS1,DLC1,TERC,NR2F2,HDX,PTCHD1,SLITRK4,SF1,THOC2,PABPC1,ROBO2,PDE4D,ARHGEF12,ABL2,NUMB,TIAL1,SP8,CUX1,HNRNPK,SOX5,PFDN5,STC1,ALCAM,ATF6,XRCC5,CKAP5,PRKG1,ARID5B,NFIC,TRPC1,RBM14,RCAN2,GRIN2B,PRICKLE2,NCAM1,TSHZ1,KAT6B,GAS1,CAMKMT,UNC13B,SLIT3,NR1D1,PAK6,MIB1,KDM2B,DU…
GO:BP	regulation of nucleobase-containing compound metabolic process	GO:0019219	2.1528e-05	4.66699	4088	462	140	21092	ZIC2,MLH1,APP,PRKN,CEP290,TARDBP,ERCC8,FER,JAZF1,SLC25A12,NFIA,USP9X,SOX6,NR2F2,HDX,SF1,PABPC1,TIAL1,SP8,CUX1,HNRNPK,SOX5,PFDN5,ATF6,XRCC5,ARID5B,NFIC,RBM14,TSHZ1,KAT6B,NR1D1,PAK6,KDM2B,SMG6,CCND3,OVOL2,KDM5A,URI1,CSRNP1,FZD5,ZNF287,CTR9,AFF3,SIN3A,L3MBTL3,SSBP3,BCL7A,FTO,DDX17,PID1,ZNF507,CPSF7,COPS2,SP9,KLF9,PTBP3,CDC5L,TFE3,BCL11B,ZNF618,DPF2,INTS2,ETS1,ZNF569,PPARGC1A,GPBP1,ZNF383,ZNF112,ID4,…
GO:BP	regulation of cellular metabolic process	GO:0031323	2.3798e-05	4.62346	5649	462	179	21092	ZIC2,MLH1,APP,PRKN,CEP290,EPM2AIP1,TARDBP,UPF3B,ERCC8,FER,JAZF1,SLC25A12,NFIA,USP9X,SOX6,IRS1,DLC1,TERC,NR2F2,HDX,SF1,PABPC1,PDE4D,ABL2,TIAL1,SP8,CUX1,HNRNPK,SOX5,PFDN5,ATF6,XRCC5,ARID5B,NFIC,RBM14,TSHZ1,KAT6B,NR1D1,PAK6,KDM2B,DUSP6,SMG6,CCND3,OVOL2,KDM5A,ATP6V0A1,URI1,LARP1B,CSRNP1,FZD5,PIK3R3,CALM3,ZNF287,CTR9,AFF3,SIN3A,TBC1D25,ADIPOR1,POR,RPS4X,L3MBTL3,SSBP3,BCL7A,FTO,DDX17,PID1,ZNF507,CPSF7,…
GO:BP	regulation of nitrogen compound metabolic process	GO:0051171	2.9741e-05	4.52664	5706	462	180	21092	ZIC2,MLH1,APP,PRKN,CEP290,TARDBP,UPF3B,ERCC8,FER,JAZF1,SLC25A12,NFIA,USP9X,SOX6,DLC1,NR2F2,HDX,SF1,PABPC1,FBXO33,PDE4D,TIAL1,SP8,CUX1,HNRNPK,SOX5,PFDN5,ATF6,XRCC5,ARID5B,NFIC,RBM14,GRIN2B,TSHZ1,KAT6B,GAS1,NR1D1,PAK6,KDM2B,DUSP6,SMG6,CCND3,PSME2,OVOL2,KDM5A,URI1,LARP1B,CSRNP1,FZD5,PIK3R3,CALM3,ZNF287,CTR9,AFF3,SIN3A,ANOS1,POR,RPS4X,L3MBTL3,SSBP3,BCL7A,PLAA,FTO,DDX17,PID1,ZNF507,CPSF7,COPS2,SP9,KLF…
GO:BP	regulation of cellular component organization	GO:0051128	5.0837e-05	4.29382	2355	462	92	21092	APP,PRKN,FER,DLC1,SLITRK4,THOC2,ROBO2,ABL2,NUMB,CUX1,HNRNPK,PFDN5,XRCC5,CKAP5,RBM14,GRIN2B,UNC13B,SLIT3,MIB1,KDM2B,SMG6,ZMYND10,URI1,FZD5,CALM3,CTR9,KCTD17,SIN3A,TBC1D25,ADIPOR1,L3MBTL3,BCL7A,PLAA,PID1,STMP1,KIF20B,CDKL5,CCP110,SCYL2,DPF2,PPARGC1A,RIMS2,DYNC1H1,CDH8,INHBA,MAPK3,SNAI2,SSRP1,STXBP1,TGFB2,THBS1,SUMO1,CAPZB,MMP14,LMAN1,GPC6,TRIM28,ZMPSTE24,CCT3,RAD21,TSG101,RAB3GAP2,CLIC4,SCAF8,AAK1,…
GO:BP	cellular nitrogen compound biosynthetic process	GO:0044271	5.1273e-05	4.29011	4853	462	158	21092	ZIC2,MLH1,APP,DLD,PRKN,CEP290,TARDBP,UPF3B,FER,JAZF1,SLC25A12,NFIA,USP9X,RPS24,B3GALT2,SOX6,NDUFV2,TERC,NR2F2,HDX,CDKAL1,SF1,PABPC1,GART,TIAL1,SP8,CUX1,HNRNPK,SOX5,PFDN5,ATF6,XRCC5,ARID5B,NFIC,RBM14,TSHZ1,KAT6B,NR1D1,PAK6,KDM2B,SMG6,VARS2,NADK2,CCND3,NDUFA8,OVOL2,KDM5A,URI1,LARP1B,CSRNP1,FZD5,ZNF287,CTR9,AFF3,SIN3A,POLR2A,ATP5F1C,RPS4X,L3MBTL3,SSBP3,BCL7A,FTO,DDX17,PID1,ZNF507,COPS2,SP9,KLF9,CDC5…
GO:BP	head development	GO:0060322	5.2057e-05	4.28352	828	462	45	21092	ZIC2,APP,ATP1A3,CEP290,SOX6,DLC1,NR2F2,PTCHD1,ROBO2,NUMB,GART,XRCC5,PRKG1,ARID5B,GRIN2B,KDM2B,CSRNP1,CALM3,GRIN2D,SIN3A,SSBP3,SLC6A17,BCL11B,SCYL2,ATP2B2,ID4,ARCN1,INHBA,MAPK3,SYNGR3,MMP14,DLX6,STXBP3,MACO1,UBA6,COL1A1,ATM,PTPRG,ADGRL3,SEMA5A,PLXNA4,SPTBN2,TTBK2,KAT2A,EPHA7
GO:BP	RNA biosynthetic process	GO:0032774	6.1113e-05	4.21386	3615	462	126	21092	ZIC2,APP,PRKN,CEP290,FER,JAZF1,NFIA,USP9X,SOX6,NR2F2,HDX,SF1,TIAL1,SP8,CUX1,HNRNPK,SOX5,PFDN5,ATF6,XRCC5,ARID5B,NFIC,RBM14,TSHZ1,KAT6B,NR1D1,PAK6,KDM2B,CCND3,OVOL2,KDM5A,URI1,CSRNP1,FZD5,ZNF287,CTR9,AFF3,SIN3A,POLR2A,L3MBTL3,SSBP3,BCL7A,DDX17,PID1,ZNF507,COPS2,SP9,KLF9,CDC5L,TFE3,BCL11B,ZNF618,DPF2,POLA1,INTS2,ETS1,ZNF569,PPARGC1A,GPBP1,ZNF383,ZNF112,ID4,INHBA,MAPK3,MAPK7,SNAI2,TGFB2,SUMO1,ZNF134…
GO:BP	regulation of RNA metabolic process	GO:0051252	6.8665e-05	4.16327	3775	462	130	21092	ZIC2,MLH1,APP,PRKN,CEP290,TARDBP,FER,JAZF1,NFIA,USP9X,SOX6,NR2F2,HDX,SF1,PABPC1,TIAL1,SP8,CUX1,HNRNPK,SOX5,PFDN5,ATF6,XRCC5,ARID5B,NFIC,RBM14,TSHZ1,KAT6B,NR1D1,PAK6,KDM2B,CCND3,OVOL2,KDM5A,URI1,CSRNP1,FZD5,ZNF287,CTR9,AFF3,SIN3A,L3MBTL3,SSBP3,BCL7A,FTO,DDX17,PID1,ZNF507,CPSF7,COPS2,SP9,KLF9,PTBP3,CDC5L,TFE3,BCL11B,ZNF618,DPF2,INTS2,ETS1,ZNF569,PPARGC1A,GPBP1,ZNF383,ZNF112,ID4,INHBA,MAPK3,MAPK7,SN…
GO:BP	nucleobase-containing compound biosynthetic process	GO:0034654	7.2987e-05	4.13676	4049	462	137	21092	ZIC2,APP,DLD,PRKN,CEP290,FER,JAZF1,SLC25A12,NFIA,USP9X,SOX6,NDUFV2,TERC,NR2F2,HDX,SF1,GART,TIAL1,SP8,CUX1,HNRNPK,SOX5,PFDN5,ATF6,XRCC5,ARID5B,NFIC,RBM14,TSHZ1,KAT6B,NR1D1,PAK6,KDM2B,SMG6,NADK2,CCND3,NDUFA8,OVOL2,KDM5A,URI1,CSRNP1,FZD5,ZNF287,CTR9,AFF3,SIN3A,POLR2A,ATP5F1C,L3MBTL3,SSBP3,BCL7A,DDX17,PID1,ZNF507,COPS2,SP9,KLF9,CDC5L,GUCY1A2,TFE3,BCL11B,ZNF618,DPF2,POLA1,INTS2,ETS1,ZNF569,PPARGC1A,GP…
GO:BP	regulation of DNA-templated transcription	GO:0006355	7.3055e-05	4.13635	3474	462	122	21092	ZIC2,APP,PRKN,CEP290,FER,JAZF1,NFIA,USP9X,SOX6,NR2F2,HDX,SF1,TIAL1,SP8,CUX1,HNRNPK,SOX5,PFDN5,ATF6,XRCC5,ARID5B,NFIC,RBM14,TSHZ1,KAT6B,NR1D1,PAK6,KDM2B,CCND3,OVOL2,KDM5A,URI1,CSRNP1,FZD5,ZNF287,CTR9,AFF3,SIN3A,L3MBTL3,SSBP3,BCL7A,DDX17,PID1,ZNF507,COPS2,SP9,KLF9,CDC5L,TFE3,BCL11B,ZNF618,DPF2,INTS2,ETS1,ZNF569,PPARGC1A,GPBP1,ZNF383,ZNF112,ID4,INHBA,MAPK3,MAPK7,SNAI2,TGFB2,SUMO1,ZNF134,PLPP3,SAP30,…
GO:BP	regulation of nucleic acid-templated transcription	GO:1903506	7.4281e-05	4.12912	3475	462	122	21092	ZIC2,APP,PRKN,CEP290,FER,JAZF1,NFIA,USP9X,SOX6,NR2F2,HDX,SF1,TIAL1,SP8,CUX1,HNRNPK,SOX5,PFDN5,ATF6,XRCC5,ARID5B,NFIC,RBM14,TSHZ1,KAT6B,NR1D1,PAK6,KDM2B,CCND3,OVOL2,KDM5A,URI1,CSRNP1,FZD5,ZNF287,CTR9,AFF3,SIN3A,L3MBTL3,SSBP3,BCL7A,DDX17,PID1,ZNF507,COPS2,SP9,KLF9,CDC5L,TFE3,BCL11B,ZNF618,DPF2,INTS2,ETS1,ZNF569,PPARGC1A,GPBP1,ZNF383,ZNF112,ID4,INHBA,MAPK3,MAPK7,SNAI2,TGFB2,SUMO1,ZNF134,PLPP3,SAP30,…
GO:BP	DNA-templated transcription	GO:0006351	8.2165e-05	4.08532	3595	462	125	21092	ZIC2,APP,PRKN,CEP290,FER,JAZF1,NFIA,USP9X,SOX6,NR2F2,HDX,SF1,TIAL1,SP8,CUX1,HNRNPK,SOX5,PFDN5,ATF6,XRCC5,ARID5B,NFIC,RBM14,TSHZ1,KAT6B,NR1D1,PAK6,KDM2B,CCND3,OVOL2,KDM5A,URI1,CSRNP1,FZD5,ZNF287,CTR9,AFF3,SIN3A,POLR2A,L3MBTL3,SSBP3,BCL7A,DDX17,PID1,ZNF507,COPS2,SP9,KLF9,CDC5L,TFE3,BCL11B,ZNF618,DPF2,INTS2,ETS1,ZNF569,PPARGC1A,GPBP1,ZNF383,ZNF112,ID4,INHBA,MAPK3,MAPK7,SNAI2,TGFB2,SUMO1,ZNF134,PLPP3…
GO:BP	nucleic acid-templated transcription	GO:0097659	8.3516e-05	4.07823	3596	462	125	21092	ZIC2,APP,PRKN,CEP290,FER,JAZF1,NFIA,USP9X,SOX6,NR2F2,HDX,SF1,TIAL1,SP8,CUX1,HNRNPK,SOX5,PFDN5,ATF6,XRCC5,ARID5B,NFIC,RBM14,TSHZ1,KAT6B,NR1D1,PAK6,KDM2B,CCND3,OVOL2,KDM5A,URI1,CSRNP1,FZD5,ZNF287,CTR9,AFF3,SIN3A,POLR2A,L3MBTL3,SSBP3,BCL7A,DDX17,PID1,ZNF507,COPS2,SP9,KLF9,CDC5L,TFE3,BCL11B,ZNF618,DPF2,INTS2,ETS1,ZNF569,PPARGC1A,GPBP1,ZNF383,ZNF112,ID4,INHBA,MAPK3,MAPK7,SNAI2,TGFB2,SUMO1,ZNF134,PLPP3…
GO:BP	regulation of RNA biosynthetic process	GO:2001141	8.624e-05	4.06429	3484	462	122	21092	ZIC2,APP,PRKN,CEP290,FER,JAZF1,NFIA,USP9X,SOX6,NR2F2,HDX,SF1,TIAL1,SP8,CUX1,HNRNPK,SOX5,PFDN5,ATF6,XRCC5,ARID5B,NFIC,RBM14,TSHZ1,KAT6B,NR1D1,PAK6,KDM2B,CCND3,OVOL2,KDM5A,URI1,CSRNP1,FZD5,ZNF287,CTR9,AFF3,SIN3A,L3MBTL3,SSBP3,BCL7A,DDX17,PID1,ZNF507,COPS2,SP9,KLF9,CDC5L,TFE3,BCL11B,ZNF618,DPF2,INTS2,ETS1,ZNF569,PPARGC1A,GPBP1,ZNF383,ZNF112,ID4,INHBA,MAPK3,MAPK7,SNAI2,TGFB2,SUMO1,ZNF134,PLPP3,SAP30,…
GO:BP	positive regulation of nitrogen compound metabolic process	GO:0051173	9.5883e-05	4.01826	3152	462	113	21092	ZIC2,MLH1,APP,PRKN,CEP290,TARDBP,UPF3B,ERCC8,SLC25A12,NFIA,USP9X,DLC1,NR2F2,PABPC1,FBXO33,HNRNPK,ATF6,XRCC5,ARID5B,NFIC,RBM14,GRIN2B,KAT6B,NR1D1,CCND3,PSME2,OVOL2,KDM5A,LARP1B,CSRNP1,FZD5,PIK3R3,CALM3,ZNF287,CTR9,SIN3A,RPS4X,SSBP3,BCL7A,FTO,DDX17,PID1,ZNF507,CDC5L,TFE3,BCL11B,DPF2,ETS1,PPARGC1A,GPBP1,ZNF112,ID4,CCND2,CTSC,INHBA,ITGA5,MAPK3,MAPK7,SNAI2,TGFB2,THBS1,SUMO1,PLPP3,EIF3D,MMP14,LCP2,TRIM…
GO:BP	organic cyclic compound biosynthetic process	GO:1901362	0.0001257	3.90065	4280	462	142	21092	ZIC2,APP,DLD,PRKN,CEP290,FER,JAZF1,SLC25A12,NFIA,USP9X,SOX6,NDUFV2,TERC,NR2F2,HDX,SF1,GART,TIAL1,SP8,CUX1,HNRNPK,SOX5,PFDN5,ATF6,XRCC5,ARID5B,NFIC,TRPC1,RBM14,TSHZ1,KAT6B,NR1D1,PAK6,KDM2B,SMG6,NADK2,CCND3,NDUFA8,OVOL2,KDM5A,URI1,CSRNP1,FZD5,ZNF287,CTR9,AFF3,SIN3A,POLR2A,POR,ATP5F1C,L3MBTL3,SSBP3,BCL7A,DDX17,PID1,ZNF507,COPS2,SP9,KLF9,CDC5L,GUCY1A2,TFE3,BCL11B,ZNF618,DPF2,POLA1,INTS2,ETS1,ZNF569,P…
GO:BP	animal organ development	GO:0048513	0.00014271	3.84556	3591	462	124	21092	ZIC2,APP,ATP1A3,CEP290,ANK2,FER,NFIA,SOX6,NDUFV2,DLC1,NR2F2,NEBL,PTCHD1,SF1,ROBO2,SOBP,NUMB,GART,SOX5,PFDN5,STC1,ATF6,XRCC5,SMTN,PRKG1,ARID5B,GRIN2B,PRICKLE2,TSHZ1,KAT6B,KLHL3,SLIT3,MIB1,KDM2B,DUSP6,UTRN,OVOL2,CSRNP1,FZD5,PIK3R3,CALM3,CTR9,GRIN2D,SIN3A,ADIPOR1,POR,L3MBTL3,SSBP3,SLC6A17,FTO,DDX17,COPS2,PTBP3,TFE3,BCL11B,SCYL2,DPF2,ETS1,ATP2B2,PPARGC1A,CELSR3,ID4,ARCN1,INHBA,MAPK3,HTRA1,SNAI2,TGFB2…
GO:BP	aromatic compound biosynthetic process	GO:0019438	0.00014531	3.83769	4133	462	138	21092	ZIC2,APP,DLD,PRKN,CEP290,FER,JAZF1,SLC25A12,NFIA,USP9X,SOX6,NDUFV2,TERC,NR2F2,HDX,SF1,GART,TIAL1,SP8,CUX1,HNRNPK,SOX5,PFDN5,ATF6,XRCC5,ARID5B,NFIC,TRPC1,RBM14,TSHZ1,KAT6B,NR1D1,PAK6,KDM2B,SMG6,NADK2,CCND3,NDUFA8,OVOL2,KDM5A,URI1,CSRNP1,FZD5,ZNF287,CTR9,AFF3,SIN3A,POLR2A,ATP5F1C,L3MBTL3,SSBP3,BCL7A,DDX17,PID1,ZNF507,COPS2,SP9,KLF9,CDC5L,GUCY1A2,TFE3,BCL11B,ZNF618,DPF2,POLA1,INTS2,ETS1,ZNF569,PPARG…
GO:BP	positive regulation of macromolecule metabolic process	GO:0010604	0.00019752	3.7044	3535	462	122	21092	ZIC2,MLH1,APP,PRKN,CEP290,EPM2AIP1,TARDBP,ANK2,UPF3B,ERCC8,NFIA,USP9X,IRS1,DLC1,NR2F2,PABPC1,FBXO33,PDE4D,HNRNPK,ATF6,XRCC5,ARID5B,NFIC,RBM14,GRIN2B,KAT6B,NR1D1,CCND3,PSME2,OVOL2,KDM5A,LARP1B,CSRNP1,FZD5,PIK3R3,CALM3,ZNF287,CTR9,SIN3A,RPS4X,SSBP3,BCL7A,FTO,DDX17,PID1,STMP1,ZNF507,CDC5L,TFE3,BCL11B,DPF2,ETS1,PPARGC1A,GPBP1,ZNF112,ID4,CCND2,CTSC,INHBA,ITGA5,MAPK3,MAPK7,SNAI2,TGFB2,THBS1,SUMO1,PLPP3…
GO:BP	biological regulation	GO:0065007	0.00020303	3.69245	13096	462	340	21092	ZIC2,MLH1,APP,ATP1A3,DLD,PRCC,PRKN,CEP290,EPM2AIP1,TARDBP,ANK2,UPF3B,ERCC8,GPC5,GRIA3,FER,JAZF1,SLC25A12,NFIA,GBE1,USP9X,RPS24,GABRA2,GRM1,SOX6,IRS1,DLC1,TERC,NR2F2,HDX,PTCHD1,SLITRK4,SF1,THOC2,PABPC1,FBXO33,ROBO2,PDE4D,ARHGEF12,ABL2,NUMB,TIAL1,SP8,CUX1,HNRNPK,SOX5,PFDN5,STC1,ALCAM,ATF6,XRCC5,CKAP5,PIANP,PRKG1,ARID5B,NFIC,TRPC1,RBM14,RCAN2,GRIN2B,PRICKLE2,NCAM1,TSHZ1,KAT6B,KLHL3,GAS1,CAMKMT,UNC13…
GO:BP	heterocycle biosynthetic process	GO:0018130	0.00022112	3.65537	4122	462	137	21092	ZIC2,APP,DLD,PRKN,CEP290,FER,JAZF1,SLC25A12,NFIA,USP9X,SOX6,NDUFV2,TERC,NR2F2,HDX,SF1,GART,TIAL1,SP8,CUX1,HNRNPK,SOX5,PFDN5,ATF6,XRCC5,ARID5B,NFIC,RBM14,TSHZ1,KAT6B,NR1D1,PAK6,KDM2B,SMG6,NADK2,CCND3,NDUFA8,OVOL2,KDM5A,URI1,CSRNP1,FZD5,ZNF287,CTR9,AFF3,SIN3A,POLR2A,ATP5F1C,L3MBTL3,SSBP3,BCL7A,DDX17,PID1,ZNF507,COPS2,SP9,KLF9,CDC5L,GUCY1A2,TFE3,BCL11B,ZNF618,DPF2,POLA1,INTS2,ETS1,ZNF569,PPARGC1A,GP…
GO:BP	positive regulation of metabolic process	GO:0009893	0.00039398	3.40453	3849	462	129	21092	ZIC2,MLH1,APP,PRKN,CEP290,EPM2AIP1,TARDBP,ANK2,UPF3B,ERCC8,SLC25A12,NFIA,USP9X,IRS1,DLC1,NR2F2,PABPC1,FBXO33,PDE4D,HNRNPK,ATF6,XRCC5,ARID5B,NFIC,RBM14,GRIN2B,KAT6B,NR1D1,CCND3,PSME2,OVOL2,KDM5A,LARP1B,CSRNP1,FZD5,PIK3R3,CALM3,ZNF287,CTR9,SIN3A,ADIPOR1,POR,RPS4X,SSBP3,BCL7A,FTO,DDX17,PID1,STMP1,ZNF507,CDC5L,TFE3,BCL11B,DPF2,ETS1,PPARGC1A,GPBP1,ZNF112,DYNC1H1,ID4,CCND2,CTSC,INHBA,ITGA5,MAPK3,MAPK7,…
GO:BP	cellular macromolecule metabolic process	GO:0044260	0.00069553	3.15768	3234	462	112	21092	MLH1,APP,PRKN,EPM2AIP1,TARDBP,UPF3B,ERCC8,NFIA,GBE1,USP9X,RPS24,B3GALT2,HS6ST2,IRS1,TERC,PHKB,CDKAL1,PABPC1,FBXO33,XRCC5,NFIC,KLHL3,CAMKMT,NR1D1,MIB1,PCMT1,SMG6,HFM1,STT3B,VARS2,LARP1B,WDR26,GALNT14,CTR9,KCTD17,SIN3A,RPS4X,BCL7A,PLAA,FTO,CDC5L,BCL11B,EIF4E2,DPF2,POLA1,PPARGC1A,INHBA,MAPK3,PSMD11,PSMD12,SSRP1,THBS1,TOP1,SUMO1,CUL1,DENR,EIF3D,PIGK,TRIM28,ZMPSTE24,MCM6,KMT2A,CCT3,NSF,RAD21,TSG101,FB…
GO:BP	positive regulation of cellular biosynthetic process	GO:0031328	0.00078387	3.10576	2033	462	79	21092	ZIC2,APP,PRKN,CEP290,EPM2AIP1,UPF3B,SLC25A12,NFIA,IRS1,NR2F2,PABPC1,HNRNPK,ATF6,XRCC5,ARID5B,NFIC,RBM14,KAT6B,NR1D1,OVOL2,KDM5A,LARP1B,CSRNP1,FZD5,ZNF287,SIN3A,POR,RPS4X,SSBP3,DDX17,PID1,ZNF507,CDC5L,TFE3,BCL11B,DPF2,ETS1,PPARGC1A,GPBP1,ZNF112,ID4,INHBA,MAPK3,MAPK7,TGFB2,THBS1,EIF3D,TRIM28,KMT2A,CCT3,TSG101,RAB3GAP2,SCAF8,KANSL2,PHIP,IMPACT,ENY2,ACTR5,MED10,MED30,LEO1,CREB3L2,NR6A1,COL1A1,TCF20,I…
GO:BP	positive regulation of cellular metabolic process	GO:0031325	0.00082986	3.081	3094	462	108	21092	ZIC2,MLH1,APP,PRKN,CEP290,EPM2AIP1,TARDBP,UPF3B,ERCC8,SLC25A12,NFIA,USP9X,IRS1,DLC1,NR2F2,PABPC1,HNRNPK,ATF6,XRCC5,ARID5B,NFIC,RBM14,KAT6B,NR1D1,CCND3,OVOL2,KDM5A,LARP1B,CSRNP1,FZD5,PIK3R3,CALM3,ZNF287,CTR9,SIN3A,POR,RPS4X,SSBP3,BCL7A,FTO,DDX17,PID1,ZNF507,CDC5L,TFE3,BCL11B,DPF2,ETS1,PPARGC1A,GPBP1,ZNF112,ID4,CCND2,INHBA,ITGA5,MAPK3,MAPK7,TGFB2,THBS1,SUMO1,PLPP3,EIF3D,LCP2,TRIM28,KMT2A,CCT3,NSF,T…
GO:BP	regulation of biological process	GO:0050789	0.00098688	3.00574	12361	462	322	21092	ZIC2,MLH1,APP,ATP1A3,DLD,PRCC,PRKN,CEP290,EPM2AIP1,TARDBP,ANK2,UPF3B,ERCC8,GPC5,GRIA3,FER,JAZF1,SLC25A12,NFIA,GBE1,USP9X,GABRA2,GRM1,SOX6,IRS1,DLC1,TERC,NR2F2,HDX,PTCHD1,SLITRK4,SF1,THOC2,PABPC1,FBXO33,ROBO2,PDE4D,ARHGEF12,ABL2,NUMB,TIAL1,SP8,CUX1,HNRNPK,SOX5,PFDN5,STC1,ALCAM,ATF6,XRCC5,CKAP5,PIANP,PRKG1,ARID5B,NFIC,TRPC1,RBM14,RCAN2,GRIN2B,PRICKLE2,NCAM1,TSHZ1,KAT6B,GAS1,CAMKMT,UNC13B,SLIT3,NR1D…
GO:BP	negative regulation of cellular process	GO:0048523	0.00103959	2.98314	4749	462	150	21092	ZIC2,MLH1,APP,PRKN,TARDBP,ANK2,FER,JAZF1,SLC25A12,GBE1,USP9X,SOX6,IRS1,DLC1,TERC,NR2F2,SF1,THOC2,PABPC1,ROBO2,PDE4D,ABL2,NUMB,TIAL1,CUX1,HNRNPK,PFDN5,STC1,XRCC5,PRKG1,ARID5B,NFIC,TRPC1,RBM14,GRIN2B,KAT6B,GAS1,SLIT3,NR1D1,MIB1,KDM2B,DUSP6,SMG6,DNAJB11,CCND3,OVOL2,KDM5A,URI1,FZD5,PIK3R3,CALM3,CTR9,SIN3A,ADIPOR1,POR,L3MBTL3,BCL7A,FTO,PID1,COPS2,PEG10,KLF9,PTBP3,CDC5L,BCL11B,EIF4E2,CCP110,SCYL2,DPF2,…
GO:BP	positive regulation of macromolecule biosynthetic process	GO:0010557	0.00149254	2.82607	1925	462	75	21092	ZIC2,APP,PRKN,CEP290,EPM2AIP1,UPF3B,NFIA,IRS1,NR2F2,PABPC1,HNRNPK,ATF6,XRCC5,ARID5B,NFIC,RBM14,KAT6B,NR1D1,OVOL2,KDM5A,LARP1B,CSRNP1,FZD5,ZNF287,SIN3A,RPS4X,SSBP3,DDX17,PID1,ZNF507,CDC5L,TFE3,BCL11B,DPF2,ETS1,PPARGC1A,GPBP1,ZNF112,ID4,INHBA,MAPK3,MAPK7,TGFB2,THBS1,EIF3D,TRIM28,KMT2A,CCT3,TSG101,SCAF8,KANSL2,PHIP,IMPACT,ENY2,ACTR5,MED10,MED30,LEO1,CREB3L2,NR6A1,COL1A1,TCF20,INO80D,KMT2C,ZNF225,ATM…
GO:BP	positive regulation of biosynthetic process	GO:0009891	0.00158134	2.80098	2069	462	79	21092	ZIC2,APP,PRKN,CEP290,EPM2AIP1,UPF3B,SLC25A12,NFIA,IRS1,NR2F2,PABPC1,HNRNPK,ATF6,XRCC5,ARID5B,NFIC,RBM14,KAT6B,NR1D1,OVOL2,KDM5A,LARP1B,CSRNP1,FZD5,ZNF287,SIN3A,POR,RPS4X,SSBP3,DDX17,PID1,ZNF507,CDC5L,TFE3,BCL11B,DPF2,ETS1,PPARGC1A,GPBP1,ZNF112,ID4,INHBA,MAPK3,MAPK7,TGFB2,THBS1,EIF3D,TRIM28,KMT2A,CCT3,TSG101,RAB3GAP2,SCAF8,KANSL2,PHIP,IMPACT,ENY2,ACTR5,MED10,MED30,LEO1,CREB3L2,NR6A1,COL1A1,TCF20,I…
GO:BP	regulation of membrane potential	GO:0042391	0.00199009	2.70113	424	462	27	21092	APP,ATP1A3,DLD,PRKN,ANK2,GRIA3,GABRA2,GRM1,GRIN2B,UNC13B,CALM3,GRIN2D,GABRA4,PID1,SCN8A,RIMS2,SUMO1,ZMPSTE24,KMT2A,WDR1,HCN1,GABRG2,INSYN2A,RYR2,KCNA2,ATP1A1,CACNA1I
GO:BP	positive regulation of nucleobase-containing compound metabolic process	GO:0045935	0.00208459	2.68098	2048	462	78	21092	ZIC2,MLH1,APP,PRKN,CEP290,TARDBP,ERCC8,SLC25A12,NFIA,USP9X,NR2F2,PABPC1,HNRNPK,ATF6,XRCC5,ARID5B,NFIC,RBM14,KAT6B,NR1D1,OVOL2,KDM5A,CSRNP1,FZD5,ZNF287,SIN3A,SSBP3,BCL7A,FTO,DDX17,PID1,ZNF507,CDC5L,TFE3,BCL11B,DPF2,ETS1,PPARGC1A,GPBP1,ZNF112,ID4,INHBA,MAPK3,MAPK7,TGFB2,TRIM28,KMT2A,CCT3,TSG101,SCAF8,KANSL2,PHIP,ENY2,ACTR5,MED10,SLX4,MED30,LEO1,BABAM2,CREB3L2,NR6A1,COL1A1,TCF20,PTPRC,INO80D,KMT2C,Z…
GO:BP	brain development	GO:0007420	0.00380644	2.41948	780	462	39	21092	ZIC2,APP,ATP1A3,CEP290,SOX6,DLC1,NR2F2,PTCHD1,ROBO2,NUMB,GART,XRCC5,PRKG1,GRIN2B,KDM2B,CALM3,GRIN2D,SIN3A,SSBP3,SLC6A17,BCL11B,SCYL2,ATP2B2,ID4,ARCN1,INHBA,SYNGR3,STXBP3,MACO1,UBA6,ATM,PTPRG,ADGRL3,SEMA5A,PLXNA4,SPTBN2,TTBK2,KAT2A,EPHA7
GO:BP	positive regulation of cellular process	GO:0048522	0.00426911	2.36966	5641	462	169	21092	ZIC2,MLH1,APP,PRKN,CEP290,EPM2AIP1,TARDBP,ANK2,UPF3B,ERCC8,GPC5,FER,SLC25A12,NFIA,USP9X,GRM1,SOX6,IRS1,DLC1,NR2F2,SLITRK4,PABPC1,ROBO2,ABL2,NUMB,TIAL1,CUX1,HNRNPK,SOX5,ATF6,XRCC5,CKAP5,ARID5B,NFIC,TRPC1,RBM14,GRIN2B,KAT6B,UNC13B,NR1D1,MIB1,KDM2B,DUSP6,CCND3,UTRN,ZMYND10,OVOL2,KDM5A,LARP1B,CSRNP1,FZD5,PIK3R3,CALM3,ZNF287,CTR9,KCTD17,GRIN2D,SIN3A,ADIPOR1,POR,RPS4X,SSBP3,BCL7A,PLAA,FTO,DDX17,GPR137C…
GO:BP	central nervous system development	GO:0007417	0.00442698	2.35389	1065	462	48	21092	ZIC2,APP,ATP1A3,PRKN,CEP290,SOX6,DLC1,NR2F2,PTCHD1,ROBO2,NUMB,GART,XRCC5,PRKG1,GRIN2B,NR1D1,KDM2B,CALM3,GRIN2D,SIN3A,SSBP3,SLC6A17,BCL11B,SCYL2,ATP2B2,ID4,ARCN1,INHBA,MAPK3,PLPP3,SYNGR3,STXBP3,WDR1,MACO1,UBA6,EIF2B3,TLX3,ZIC5,NCKAP1,ATM,PTPRG,ADGRL3,SEMA5A,PLXNA4,SPTBN2,TTBK2,KAT2A,EPHA7
GO:BP	regulation of localization	GO:0032879	0.00446949	2.34974	2089	462	78	21092	APP,PRKN,CEP290,TARDBP,ANK2,GPC5,FER,IRS1,THOC2,PDE4D,ABL2,NUMB,HNRNPK,STC1,TRPC1,GRIN2B,GAS1,UNC13B,NR1D1,MIB1,UTRN,KCNA4,STX8,FZD5,SV2A,CALM3,GRIN2D,SIN3A,PLAA,FTO,PID1,RABGAP1L,KIF20B,SCYL2,SCN8A,GAPVD1,RIMS2,DYNC1H1,INHBA,MAPK3,STXBP1,TGFB2,THBS1,SUMO1,SYNGR3,MMP14,LMAN1,GPC6,TRIM28,KMT2A,CCT3,NSF,TSG101,LMAN2,SYN1,STXBP3,CLIC4,AAK1,DERL2,RAB10,HCN1,RINT1,TAMALIN,XPO4,PTPRC,RYR2,MKLN1,SAPCD2,…
GO:BP	positive regulation of biological process	GO:0048518	0.00660409	2.18019	6309	462	184	21092	ZIC2,MLH1,APP,PRKN,CEP290,EPM2AIP1,TARDBP,ANK2,UPF3B,ERCC8,GPC5,FER,SLC25A12,NFIA,USP9X,GRM1,SOX6,IRS1,DLC1,NR2F2,SLITRK4,PABPC1,FBXO33,ROBO2,PDE4D,ABL2,NUMB,TIAL1,CUX1,HNRNPK,SOX5,STC1,ATF6,XRCC5,CKAP5,ARID5B,NFIC,TRPC1,RBM14,GRIN2B,KAT6B,UNC13B,NR1D1,MIB1,KDM2B,DUSP6,CCND3,PSME2,UTRN,ZMYND10,OVOL2,KDM5A,LARP1B,CSRNP1,FZD5,PIK3R3,CALM3,ZNF287,CTR9,KCTD17,GRIN2D,SIN3A,ADIPOR1,POR,RPS4X,SSBP3,BCL7…
GO:BP	protein metabolic process	GO:0019538	0.00958196	2.01855	5462	462	163	21092	MLH1,APP,DLD,PRKN,TARDBP,UPF3B,ERCC8,FER,USP9X,RPS24,B3GALT2,HS6ST2,DLC1,HLCS,PHKB,NR2F2,CDKAL1,PABPC1,FBXO33,PDE4D,ABL2,PFDN5,ATF6,XRCC5,PRKG1,RBM14,GRIN2B,KAT6B,KLHL3,GAS1,CAMKMT,NR1D1,PAK6,MIB1,KDM2B,DUSP6,PCMT1,DNAJB11,STT3B,VARS2,CCND3,PSME2,KDM5A,LARP1B,WDR26,FZD5,PIK3R3,GALNT14,KLHL9,CALM3,CTR9,KCTD17,SIN3A,ANOS1,POR,RPS4X,PLAA,FTO,PID1,HECTD4,COPS2,UBE2QL1,EIF4E2,CDKL5,SCYL2,PPARGC1A,CCND…
GO:BP	neurogenesis	GO:0022008	0.011799	1.92816	1680	462	65	21092	APP,PRKN,CEP290,USP9X,SOX6,NR2F2,SLITRK4,THOC2,ROBO2,ABL2,NUMB,CUX1,SOX5,ALCAM,XRCC5,PRKG1,NCAM1,SLIT3,NR1D1,PAK6,MIB1,DNAJB11,FZD5,SIN3A,ANOS1,PLAA,COPS2,BCL11B,KIF20B,CDKL5,SCYL2,ATP2B2,RIMS2,ID4,INHBA,MAPK3,STXBP1,TGFB2,TMEFF1,PLPP3,ARL3,MMP14,SYN1,RAB10,WDR1,UBA6,IMPACT,EIF2B3,SH3RF1,TLX3,HCN1,DNAAF4,NCKAP1,CREB3L2,TRIM67,LRIG2,PPP2R3A,PTPRG,ADGRL3,REST,EFNA5,SEMA5A,PLXNA4,CPEB3,EPHA7
GO:BP	regulation of macromolecule metabolic process	GO:0060255	0.0130713	1.88368	6842	462	195	21092	ZIC2,MLH1,APP,PRKN,CEP290,EPM2AIP1,TARDBP,ANK2,UPF3B,ERCC8,FER,JAZF1,NFIA,USP9X,SOX6,IRS1,DLC1,NR2F2,HDX,SF1,THOC2,PABPC1,FBXO33,PDE4D,TIAL1,SP8,CUX1,HNRNPK,SOX5,PFDN5,ATF6,XRCC5,ARID5B,NFIC,RBM14,GRIN2B,TSHZ1,KAT6B,GAS1,SLIT3,NR1D1,PAK6,KDM2B,DUSP6,SMG6,CCND3,PSME2,OVOL2,KDM5A,URI1,LARP1B,CSRNP1,FZD5,PIK3R3,CALM3,ZNF287,CTR9,AFF3,SIN3A,ANOS1,POR,RPS4X,L3MBTL3,SSBP3,BCL7A,PLAA,FTO,DDX17,PID1,STMP…
GO:BP	regulation of metabolic process	GO:0019222	0.0155047	1.80954	7377	462	207	21092	ZIC2,MLH1,APP,PRKN,CEP290,EPM2AIP1,TARDBP,ANK2,UPF3B,ERCC8,FER,JAZF1,SLC25A12,NFIA,USP9X,SOX6,IRS1,DLC1,TERC,NR2F2,HDX,SF1,THOC2,PABPC1,FBXO33,PDE4D,ABL2,TIAL1,SP8,CUX1,HNRNPK,SOX5,PFDN5,ATF6,XRCC5,ARID5B,NFIC,RBM14,GRIN2B,TSHZ1,KAT6B,GAS1,SLIT3,NR1D1,PAK6,KDM2B,DUSP6,SMG6,CCND3,PSME2,OVOL2,KDM5A,ATP6V0A1,URI1,LARP1B,CSRNP1,FZD5,PIK3R3,CALM3,ZNF287,CTR9,AFF3,SIN3A,TBC1D25,ADIPOR1,ANOS1,POR,RPS4X,…
GO:BP	organonitrogen compound metabolic process	GO:1901564	0.0164901	1.78278	6522	462	187	21092	ETFA,MLH1,APP,DLD,PRKN,TARDBP,DPYD,UPF3B,ERCC8,FER,SLC25A12,USP9X,RPS24,B3GALT2,HS6ST2,NDUFV2,DLC1,HLCS,PHKB,NR2F2,CDKAL1,PABPC1,FBXO33,PDE4D,ABL2,KDSR,GART,PFDN5,ATF6,XRCC5,CHST1,PRKG1,RBM14,GRIN2B,KAT6B,KLHL3,GAS1,CAMKMT,NR1D1,PAK6,MIB1,KDM2B,DUSP6,PCMT1,DNAJB11,STT3B,VARS2,NADK2,CCND3,PSME2,NDUFA8,KDM5A,LARP1B,WDR26,FZD5,PIK3R3,GALNT14,KLHL9,CALM3,CTR9,KCTD17,SIN3A,FAH,FUCA1,ANOS1,BLVRB,POR,AT…
GO:BP	regulation of transport	GO:0051049	0.0227798	1.64245	1750	462	66	21092	APP,PRKN,CEP290,TARDBP,ANK2,FER,IRS1,THOC2,PDE4D,ABL2,NUMB,HNRNPK,STC1,TRPC1,GRIN2B,GAS1,UNC13B,NR1D1,MIB1,UTRN,KCNA4,FZD5,SV2A,CALM3,GRIN2D,PLAA,PID1,KIF20B,SCYL2,SCN8A,GAPVD1,RIMS2,DYNC1H1,INHBA,MAPK3,STXBP1,TGFB2,THBS1,SUMO1,SYNGR3,LMAN1,TRIM28,KMT2A,NSF,TSG101,LMAN2,SYN1,STXBP3,CLIC4,AAK1,DERL2,RAB10,HCN1,RINT1,TAMALIN,XPO4,PTPRC,RYR2,MKLN1,KCNA2,ATP1A1,REST,EFNA5,CACNA1I,HUWE1,PCLO
GO:BP	positive regulation of RNA metabolic process	GO:0051254	0.0330227	1.48119	1842	462	68	21092	ZIC2,MLH1,APP,PRKN,CEP290,TARDBP,NFIA,NR2F2,PABPC1,HNRNPK,ATF6,ARID5B,NFIC,RBM14,KAT6B,NR1D1,OVOL2,KDM5A,CSRNP1,FZD5,ZNF287,SIN3A,SSBP3,FTO,DDX17,PID1,ZNF507,CDC5L,TFE3,BCL11B,DPF2,ETS1,PPARGC1A,GPBP1,ZNF112,ID4,INHBA,MAPK3,MAPK7,TGFB2,TRIM28,KMT2A,TSG101,SCAF8,KANSL2,PHIP,ENY2,ACTR5,MED10,MED30,LEO1,CREB3L2,NR6A1,COL1A1,TCF20,INO80D,KMT2C,ZNF225,ATM,USF3,REST,MYBL1,ZNF658,CPEB3,ZFP90,KAT2A,ASXL3…
GO:BP	catabolic process	GO:0009056	0.0374168	1.42693	2587	462	88	21092	ETFA,MLH1,APP,DLD,PRKN,TARDBP,DPYD,UPF3B,ERCC8,SLC25A12,USP9X,IRS1,ACAA1,PABPC1,FBXO33,PDE4D,ABL2,ATF6,KLHL3,LRBA,NR1D1,MIB1,SMG6,STT3B,PSME2,ATP6V0A1,WDR26,FZD5,ATG2B,KCTD17,TBC1D25,FAH,FUCA1,HADHA,BLVRB,POR,PLAA,FTO,INPP4B,GALE,ATP6V1C1,CTSC,GOT1,GOT2,PGAM1,PGM1,MAPK3,PSMD11,PSMD12,SUMO1,CUL1,SUCLG2,MMP14,ZMPSTE24,MMP16,NSF,TSG101,FBXL3,RAB3GAP2,CCDC22,PPP1R8,EDC4,SND1,PIK3R4,DERL2,PIAS1,TENT5A…
GO:BP	cellular developmental process	GO:0048869	0.04204	1.37634	4280	462	131	21092	ZIC2,MLH1,APP,DLD,PRKN,CEP290,ANK2,FER,USP9X,SOX6,NR2F2,NEBL,SLITRK4,SF1,THOC2,ROBO2,PDE4D,ABL2,NUMB,TIAL1,CUX1,SOX5,STC1,ALCAM,XRCC5,PRKG1,ARID5B,NCAM1,GAS1,SLIT3,NR1D1,PAK6,MIB1,DUSP6,DNAJB11,COL12A1,OVOL2,FZD5,PIK3R3,CTR9,SIN3A,ADIPOR1,ANOS1,POR,L3MBTL3,SSBP3,BCL7A,PLAA,FTO,DDX17,KIF2A,PID1,COPS2,PEG10,PTBP3,TFE3,BCL11B,KIF20B,CDKL5,SCYL2,DPF2,ETS1,ATP2B2,PPARGC1A,RIMS2,ID4,INHBA,ITGA5,MAPK3,M…
GO:BP	cell morphogenesis	GO:0000902	0.0459463	1.33775	1030	462	44	21092	APP,PRKN,FER,USP9X,DLC1,SLITRK4,THOC2,ROBO2,NUMB,CUX1,STC1,ALCAM,NCAM1,SLIT3,PAK6,SIN3A,ANOS1,PLAA,BCL11B,KIF20B,CDKL5,FGD4,RIMS2,CDH8,STXBP1,TGFB2,TMEFF1,CAPZB,ZMPSTE24,CDH10,CLIC4,RAB10,WDR1,PHIP,FGD6,IMPACT,LRATD1,NCKAP1,MKLN1,CDH24,EFNA5,SEMA5A,PLXNA4,EPHA7
GO:BP	developmental growth involved in morphogenesis	GO:0060560	0.0484359	1.31483	237	462	17	21092	APP,PRKN,USP9X,ALCAM,SLIT3,PAK6,SIN3A,PLAA,CDKL5,RIMS2,TRIM28,IMPACT,PPP2R3A,EFNA5,SEMA5A,PLXNA4,EPHA7

## Sheet: HCvApes_HIP_Apes_Up
source	term_name	term_id	adjusted_p_value	negative_log10_of_adjusted_p_value	term_size	query_size	intersection_size	effective_domain_size	intersections
GO:BP	regulation of biological quality	GO:0065008	0.00853778	2.06865	3726	44	21	21092	FLT3,BRAF,CRB1,DISP1,LRRK2,RIMS1,PNKD,ACACA,ARNT,PDE1B,CACNG2,WDR81,JPH1,GRIA1,TSHZ3,SCG5,WDR48,SEMA3G,PDXP,SCN5A,ZFPM1
GO:BP	negative regulation of synaptic transmission	GO:0050805	0.0293846	1.53188	72	44	4	21092	BRAF,LRRK2,PNKD,GRIA1

## Sheet: StrepvHom_PFC
source	term_name	term_id	adjusted_p_value	negative_log10_of_adjusted_p_value	term_size	query_size	intersection_size	effective_domain_size	intersections
GO:BP	nervous system development	GO:0007399	1.23e-12	11.9094	2504	642	148	21092	ANOS1,ATP1A2,ATP1A3,IRS2,NDUFS4,MAP2K1,DLG4,PKD2,AHI1,FKTN,ABCC8,SPG11,RPGRIP1L,NF2,SOX2,EIF2B4,BMPR2,DYRK1A,BBS4,PAFAH1B1,ATM,MYO6,LRP8,RELN,CDH2,TOX,VCAN,LPIN1,TRIOBP,KIFAP3,PRICKLE1,NECTIN1,SPTBN2,KIAA0319,DICER1,AFF2,KIFBP,PIKFYVE,OPRM1,CUX2,SEMA4A,NUMB,GART,ATRN,CAMK2B,CAMK2G,DNMT3A,PTK2B,ITSN2,APBB1,KIF1A,ALCAM,APLP2,MARK2,RARG,NRCAM,SPTBN4,ANK3,FZD8,BCAN,SYNJ1,DPYSL2,ABI1,SERPINE2,SLIT3,NR…
GO:BP	regulation of cellular process	GO:0050794	2.01e-12	11.6965	11130	642	437	21092	BRCA1,STAT5B,FANCL,FHIT,ATP1A2,PRCC,IRS2,NDUFS4,ZNF41,LRPPRC,UTP4,MAP2K1,DLG4,FBXO11,PKD2,AHI1,TARDBP,FKTN,ELP1,INSR,ABCC8,KCNH2,RPGRIP1L,PKP2,NF2,SOX2,EIF2B4,BMPR2,DYRK1A,HTT,BBS4,HPS4,PAFAH1B1,NSD1,ATM,MYO6,ADCY9,GRIK3,JAZF1,LRP8,CACNA1A,USF1,AKAP9,PCDH11Y,GABRA4,GBE1,LIFR,ZFYVE26,RELN,SCN1A,CDH2,TOX,ADD1,PPP2R1B,SNCB,DNM1L,MCC,KLF6,KCND1,SLC4A4,SIX5,MBTPS2,SCN9A,CHD2,DDX3X,LPIN1,TRIOBP,KIFAP3,…
GO:BP	developmental process	GO:0032502	9.58e-12	11.0187	6424	642	288	21092	BRCA1,SMC1A,ANOS1,STAT5B,PHEX,ATP1A2,ATP1A3,IRS2,NDUFS4,MAP2K1,DLG4,PKD2,AHI1,FKTN,INSR,ABCC8,SPG11,SGCZ,RPGRIP1L,PKP2,NF2,SOX2,EIF2B4,BMPR2,DYRK1A,BBS4,HPS4,PAFAH1B1,ATM,MYO6,ADCY9,LRP8,NHS,PCDH11Y,RELN,CDH2,TOX,ADD1,PPP2R1B,PAPSS2,DNM1L,ALDH6A1,KLF6,SEPTIN6,VCAN,SIX5,MBTPS2,SCN9A,CHD2,DDX3X,LPIN1,TRIOBP,KIFAP3,KRIT1,PRICKLE1,NECTIN1,FHL1,SPTBN2,KIAA0319,HUWE1,DICER1,AFF2,MED14,CLCN2,LTBP3,MSH3,…
GO:BP	negative regulation of cellular process	GO:0048523	4.35e-11	10.3613	4749	642	228	21092	BRCA1,STAT5B,FHIT,ATP1A2,IRS2,LRPPRC,MAP2K1,DLG4,PKD2,AHI1,TARDBP,FKTN,ABCC8,KCNH2,RPGRIP1L,PKP2,NF2,SOX2,BMPR2,DYRK1A,HTT,BBS4,PAFAH1B1,NSD1,ATM,GRIK3,JAZF1,GBE1,CDH2,ADD1,SNCB,MCC,SIX5,DDX3X,LPIN1,TRIOBP,KIFAP3,KRIT1,PRICKLE1,FHL1,GNAI2,SPTBN2,KIAA0319,HUWE1,DICER1,LTBP3,MTMR8,MSH3,CRBN,INHA,OPRM1,LRCH1,CUX2,SMAD7,GPD1L,PABPC1,SEMA4A,SPTAN1,VDAC1,PLEKHA1,GNAQ,ARRB1,SORT1,MAPK8,NUMB,CREM,NFATC3,…
GO:BP	regulation of transport	GO:0051049	5.61e-11	10.2511	1750	642	112	21092	ATP1A2,IRS2,MAP2K1,DLG4,PKD2,AHI1,TARDBP,INSR,ABCC8,SPG11,KCNH2,PKP2,HTT,HPS4,MYO6,CACNA1A,AKAP9,RELN,SCN1A,CDH2,DNM1L,KCND1,SCN9A,FXYD6,FHL1,NOS1AP,GNAI2,CACNB2,HUWE1,CLCN2,CRBN,INHA,OPRM1,NUP214,GPD1L,VDAC1,KCTD7,ARRB1,MAPK8,NUMB,CABP1,CAMK2B,CAMK2G,HSPA8,PTK2B,HNRNPK,APBB1,STC1,DAPK1,SPTBN4,ANK3,SYNJ1,RASGRF2,TRPC3,TRPC1,TRDN,GAS1,SERPINE2,MBTPS1,NR1D1,MFF,ADCY5,NUP58,SORBS1,CACNA2D2,ADCY1,KCN…
GO:BP	anatomical structure development	GO:0048856	7.25e-11	10.1398	5836	642	265	21092	BRCA1,ANOS1,STAT5B,PHEX,ATP1A2,ATP1A3,IRS2,NDUFS4,MAP2K1,DLG4,PKD2,AHI1,FKTN,INSR,ABCC8,SPG11,SGCZ,RPGRIP1L,PKP2,NF2,SOX2,EIF2B4,BMPR2,DYRK1A,BBS4,PAFAH1B1,ATM,MYO6,ADCY9,LRP8,NHS,RELN,CDH2,TOX,ADD1,PPP2R1B,PAPSS2,DNM1L,KLF6,VCAN,SIX5,MBTPS2,SCN9A,CHD2,LPIN1,TRIOBP,KIFAP3,KRIT1,PRICKLE1,NECTIN1,FHL1,SPTBN2,KIAA0319,HUWE1,DICER1,AFF2,CLCN2,LTBP3,MSH3,INHA,KIFBP,INO80,ARHGEF28,PIKFYVE,OPRM1,TEAD1,C…
GO:BP	anatomical structure morphogenesis	GO:0009653	1.25e-10	9.90233	2722	642	151	21092	BRCA1,ANOS1,PHEX,MAP2K1,DLG4,PKD2,AHI1,INSR,ABCC8,SPG11,RPGRIP1L,PKP2,NF2,SOX2,BMPR2,BBS4,PAFAH1B1,ATM,MYO6,LRP8,RELN,CDH2,ADD1,PPP2R1B,DNM1L,TRIOBP,KRIT1,PRICKLE1,NECTIN1,FHL1,SPTBN2,KIAA0319,HUWE1,DICER1,LTBP3,ARHGEF28,PIKFYVE,CUX2,SMAD7,SEMA4A,PLEKHA1,MAB21L1,NUBPL,NUMB,ATRN,CAMK2B,PTK2B,ITSN2,APBB1,STC1,KIF1A,ALCAM,APLP2,MARK2,RARG,ABLIM1,NRCAM,SPTBN4,ANK3,BRWD1,FZD8,DPYSL2,ABI1,ARID5B,NACA,P…
GO:BP	regulation of localization	GO:0032879	1.78e-10	9.74888	2089	642	125	21092	ATP1A2,IRS2,MAP2K1,DLG4,PKD2,AHI1,TARDBP,INSR,ABCC8,SPG11,KCNH2,PKP2,NF2,HTT,HPS4,MYO6,CACNA1A,AKAP9,RELN,SCN1A,CDH2,DNM1L,KCND1,SCN9A,FXYD6,FHL1,NOS1AP,GNAI2,CACNB2,HUWE1,CLCN2,CRBN,INHA,OPRM1,NUP214,GPD1L,VDAC1,KCTD7,ARRB1,MAPK8,NUMB,CABP1,CAMK2B,CAMK2G,HSPA8,PTK2B,DNAJB2,HNRNPK,APBB1,STC1,DAPK1,SPTBN4,ANK3,SYNJ1,RASGRF2,NACA,TRPC3,TRPC1,TRDN,GAS1,LARP7,SERPINE2,MBTPS1,NR1D1,MFF,ADCY5,NUP58,SOR…
GO:BP	cell morphogenesis involved in neuron differentiation	GO:0048667	4e-10	9.3981	573	642	54	21092	ANOS1,MAP2K1,DLG4,SPG11,BMPR2,PAFAH1B1,LRP8,RELN,CDH2,TRIOBP,NECTIN1,KIAA0319,CUX2,SEMA4A,NUMB,CAMK2B,APBB1,KIF1A,ALCAM,APLP2,MARK2,NRCAM,SPTBN4,ANK3,DPYSL2,ABI1,SLIT3,DIXDC1,ADCY1,PREX2,RERE,TNR,SEMA3D,RUFY3,RIPOR2,COBL,SIN3A,SYNGAP1,BCL11B,GAP43,TMEFF1,LHX1,RAB10,SHTN1,USP9X,NLGN1,UNC5C,SEMA3A,PLXNA4,FZD3,BRAF,RYK,DAB1,SEMA3G
GO:BP	biological regulation	GO:0065007	5.56e-10	9.25456	13096	642	484	21092	BRCA1,ANOS1,STAT5B,FANCL,FHIT,ATP1A2,ATP1A3,PRCC,IRS2,NDUFS4,ZNF41,LRPPRC,UTP4,MAP2K1,PC,DLG4,FBXO11,PKD2,AHI1,TARDBP,FKTN,ELP1,INSR,ABCC8,GPHN,SPG11,SGCZ,KCNH2,SLC22A5,RPGRIP1L,PKP2,NF2,SOX2,EIF2B4,BMPR2,DYRK1A,HTT,BBS4,HPS4,PAFAH1B1,NSD1,ATM,MYO6,ADCY9,GRIK3,JAZF1,LRP8,CACNA1A,USF1,AKAP9,PCDH11Y,GABRA4,GBE1,LIFR,ZFYVE26,RELN,SCN1A,CDH2,TOX,ADD1,PPP2R1B,SNCB,PAPSS2,DNM1L,MCC,KLF6,KCND1,RPS24,SLC…
GO:BP	cell part morphogenesis	GO:0032990	5.8e-10	9.23693	671	642	59	21092	ANOS1,MAP2K1,DLG4,SPG11,BMPR2,PAFAH1B1,LRP8,RELN,CDH2,DNM1L,NECTIN1,KIAA0319,DICER1,CUX2,SEMA4A,NUBPL,NUMB,CAMK2B,ITSN2,APBB1,KIF1A,ALCAM,APLP2,MARK2,NRCAM,SPTBN4,ANK3,DPYSL2,ABI1,SLIT3,DIXDC1,MFF,ADCY1,PREX2,RERE,TNR,SEMA3D,RUFY3,COBL,SIN3A,PLAA,SYNGAP1,BCL11B,GAP43,TMEFF1,NBL1,LHX1,RAB10,SHTN1,USP9X,NLGN1,UNC5C,SEMA3A,PLXNA4,FZD3,BRAF,RYK,DAB1,SEMA3G
GO:BP	system development	GO:0048731	8.23e-10	9.08436	4369	642	210	21092	BRCA1,ANOS1,STAT5B,PHEX,ATP1A2,ATP1A3,IRS2,NDUFS4,MAP2K1,DLG4,PKD2,AHI1,FKTN,INSR,ABCC8,SPG11,SGCZ,RPGRIP1L,PKP2,NF2,SOX2,EIF2B4,BMPR2,DYRK1A,BBS4,PAFAH1B1,ATM,MYO6,LRP8,NHS,RELN,CDH2,TOX,ADD1,PAPSS2,KLF6,VCAN,SIX5,MBTPS2,CHD2,LPIN1,TRIOBP,KIFAP3,KRIT1,PRICKLE1,NECTIN1,SPTBN2,KIAA0319,DICER1,AFF2,CLCN2,LTBP3,MSH3,INHA,KIFBP,PIKFYVE,OPRM1,CUX2,ADAMTS2,SMAD7,SEMA4A,PLEKHA1,MAB21L1,NUMB,NFATC3,GART,…
GO:BP	plasma membrane bounded cell projection organization	GO:0120036	1.32e-09	8.87971	1509	642	98	21092	ANOS1,ATP1A3,MAP2K1,DLG4,PKD2,AHI1,INSR,SPG11,RPGRIP1L,BMPR2,HTT,BBS4,PAFAH1B1,LRP8,RELN,CDH2,TOX,SEPTIN6,TRIOBP,KIFAP3,NECTIN1,KIAA0319,DICER1,CUX2,SEMA4A,PLEKHA1,NEK1,NUMB,CAMK2B,CAMK2G,PTK2B,ITSN2,APBB1,KIF1A,ALCAM,APLP2,MARK2,ABLIM1,NRCAM,SPTBN4,ANK3,DPYSL2,ABI1,SLIT3,RTTN,DIXDC1,DYNC2I1,ADCY1,SCLT1,STX1B,KLHL41,KATNB1,PREX2,RERE,RTN4IP1,RAPGEF1,TNR,SEMA3D,MTSS2,RUFY3,ABLIM3,RIPOR2,ARHGAP24,C…
GO:BP	multicellular organism development	GO:0007275	1.68e-09	8.77596	4823	642	225	21092	BRCA1,ANOS1,STAT5B,PHEX,ATP1A2,ATP1A3,IRS2,NDUFS4,MAP2K1,DLG4,PKD2,AHI1,FKTN,INSR,ABCC8,SPG11,SGCZ,RPGRIP1L,PKP2,NF2,SOX2,EIF2B4,BMPR2,DYRK1A,BBS4,PAFAH1B1,ATM,MYO6,ADCY9,LRP8,NHS,RELN,CDH2,TOX,ADD1,PAPSS2,KLF6,VCAN,SIX5,MBTPS2,SCN9A,CHD2,LPIN1,TRIOBP,KIFAP3,KRIT1,PRICKLE1,NECTIN1,SPTBN2,KIAA0319,DICER1,AFF2,CLCN2,LTBP3,MSH3,INHA,KIFBP,INO80,PIKFYVE,OPRM1,TEAD1,CUX2,ADAMTS2,SMAD7,SEMA4A,PLEKHA1,M…
GO:BP	neuron projection morphogenesis	GO:0048812	1.78e-09	8.75036	632	642	56	21092	ANOS1,MAP2K1,DLG4,SPG11,BMPR2,PAFAH1B1,LRP8,RELN,CDH2,NECTIN1,KIAA0319,DICER1,CUX2,SEMA4A,NUMB,CAMK2B,ITSN2,APBB1,KIF1A,ALCAM,APLP2,MARK2,NRCAM,SPTBN4,ANK3,DPYSL2,ABI1,SLIT3,DIXDC1,ADCY1,PREX2,RERE,TNR,SEMA3D,RUFY3,COBL,SIN3A,PLAA,SYNGAP1,BCL11B,GAP43,TMEFF1,NBL1,LHX1,RAB10,SHTN1,USP9X,NLGN1,UNC5C,SEMA3A,PLXNA4,FZD3,BRAF,RYK,DAB1,SEMA3G
GO:BP	neuron projection development	GO:0031175	1.85e-09	8.73305	970	642	73	21092	ANOS1,MAP2K1,DLG4,SPG11,BMPR2,BBS4,PAFAH1B1,LRP8,RELN,CDH2,TOX,TRIOBP,NECTIN1,KIAA0319,DICER1,CUX2,SEMA4A,NUMB,CAMK2B,CAMK2G,PTK2B,ITSN2,APBB1,KIF1A,ALCAM,APLP2,MARK2,NRCAM,SPTBN4,ANK3,DPYSL2,ABI1,SLIT3,DIXDC1,ADCY1,STX1B,KATNB1,PREX2,RERE,RTN4IP1,RAPGEF1,TNR,SEMA3D,RUFY3,RIPOR2,COBL,SIN3A,PLAA,SYNGAP1,BCL11B,GAP43,TMEFF1,NBL1,LHX1,RAB10,STRN,SHTN1,USP9X,NLGN1,LRIG2,UNC5C,SEMA3A,PLXNA4,NTRK3,FZD3…
GO:BP	neurogenesis	GO:0022008	4.44e-09	8.35272	1680	642	104	21092	ANOS1,MAP2K1,DLG4,AHI1,ABCC8,SPG11,RPGRIP1L,NF2,SOX2,EIF2B4,BMPR2,BBS4,PAFAH1B1,MYO6,LRP8,RELN,CDH2,TOX,VCAN,TRIOBP,KIFAP3,NECTIN1,KIAA0319,DICER1,OPRM1,CUX2,SEMA4A,NUMB,CAMK2B,CAMK2G,DNMT3A,PTK2B,ITSN2,APBB1,KIF1A,ALCAM,APLP2,MARK2,NRCAM,SPTBN4,ANK3,FZD8,SYNJ1,DPYSL2,ABI1,SERPINE2,SLIT3,NR1D1,DIXDC1,DNAJB11,ADCY1,SCLT1,KCNB1,STX1B,TUBB2A,KATNB1,PREX2,RERE,RTN4IP1,RAPGEF1,SOX11,TNR,SEMA3D,RUFY3,R…
GO:BP	cell morphogenesis	GO:0000902	4.45e-09	8.35163	1030	642	75	21092	ANOS1,MAP2K1,DLG4,SPG11,BMPR2,PAFAH1B1,LRP8,RELN,CDH2,ADD1,TRIOBP,NECTIN1,KIAA0319,DICER1,ARHGEF28,CUX2,SEMA4A,NUMB,ATRN,CAMK2B,PTK2B,ITSN2,APBB1,STC1,KIF1A,ALCAM,APLP2,MARK2,NRCAM,SPTBN4,ANK3,BRWD1,DPYSL2,ABI1,SLIT3,DIXDC1,ADCY1,MYH10,PREX2,RERE,TNR,SEMA3D,RUFY3,RIPOR2,COBL,SIN3A,P4HB,PLAA,PRKDC,SYNGAP1,BCL11B,DIAPH1,GAP43,TMEFF1,NBL1,LHX1,RAB10,PHIP,FGD6,FAT1,SHTN1,USP9X,NLGN1,UNC5C,SEMA3A,PLXN…
GO:BP	plasma membrane bounded cell projection morphogenesis	GO:0120039	4.59e-09	8.33834	647	642	56	21092	ANOS1,MAP2K1,DLG4,SPG11,BMPR2,PAFAH1B1,LRP8,RELN,CDH2,NECTIN1,KIAA0319,DICER1,CUX2,SEMA4A,NUMB,CAMK2B,ITSN2,APBB1,KIF1A,ALCAM,APLP2,MARK2,NRCAM,SPTBN4,ANK3,DPYSL2,ABI1,SLIT3,DIXDC1,ADCY1,PREX2,RERE,TNR,SEMA3D,RUFY3,COBL,SIN3A,PLAA,SYNGAP1,BCL11B,GAP43,TMEFF1,NBL1,LHX1,RAB10,SHTN1,USP9X,NLGN1,UNC5C,SEMA3A,PLXNA4,FZD3,BRAF,RYK,DAB1,SEMA3G
GO:BP	regulation of biological process	GO:0050789	4.92e-09	8.30827	12361	642	460	21092	BRCA1,ANOS1,STAT5B,FANCL,FHIT,ATP1A2,ATP1A3,PRCC,IRS2,NDUFS4,ZNF41,LRPPRC,UTP4,MAP2K1,PC,DLG4,FBXO11,PKD2,AHI1,TARDBP,FKTN,ELP1,INSR,ABCC8,SPG11,KCNH2,SLC22A5,RPGRIP1L,PKP2,NF2,SOX2,EIF2B4,BMPR2,DYRK1A,HTT,BBS4,HPS4,PAFAH1B1,NSD1,ATM,MYO6,ADCY9,GRIK3,JAZF1,LRP8,CACNA1A,USF1,AKAP9,PCDH11Y,GABRA4,GBE1,LIFR,ZFYVE26,RELN,SCN1A,CDH2,TOX,ADD1,PPP2R1B,SNCB,DNM1L,MCC,KLF6,KCND1,SLC4A4,SIX5,MBTPS2,SCN9A,C…
GO:BP	cell projection morphogenesis	GO:0048858	6.25e-09	8.20423	652	642	56	21092	ANOS1,MAP2K1,DLG4,SPG11,BMPR2,PAFAH1B1,LRP8,RELN,CDH2,NECTIN1,KIAA0319,DICER1,CUX2,SEMA4A,NUMB,CAMK2B,ITSN2,APBB1,KIF1A,ALCAM,APLP2,MARK2,NRCAM,SPTBN4,ANK3,DPYSL2,ABI1,SLIT3,DIXDC1,ADCY1,PREX2,RERE,TNR,SEMA3D,RUFY3,COBL,SIN3A,PLAA,SYNGAP1,BCL11B,GAP43,TMEFF1,NBL1,LHX1,RAB10,SHTN1,USP9X,NLGN1,UNC5C,SEMA3A,PLXNA4,FZD3,BRAF,RYK,DAB1,SEMA3G
GO:BP	cell projection organization	GO:0030030	6.4e-09	8.19394	1550	642	98	21092	ANOS1,ATP1A3,MAP2K1,DLG4,PKD2,AHI1,INSR,SPG11,RPGRIP1L,BMPR2,HTT,BBS4,PAFAH1B1,LRP8,RELN,CDH2,TOX,SEPTIN6,TRIOBP,KIFAP3,NECTIN1,KIAA0319,DICER1,CUX2,SEMA4A,PLEKHA1,NEK1,NUMB,CAMK2B,CAMK2G,PTK2B,ITSN2,APBB1,KIF1A,ALCAM,APLP2,MARK2,ABLIM1,NRCAM,SPTBN4,ANK3,DPYSL2,ABI1,SLIT3,RTTN,DIXDC1,DYNC2I1,ADCY1,SCLT1,STX1B,KLHL41,KATNB1,PREX2,RERE,RTN4IP1,RAPGEF1,TNR,SEMA3D,MTSS2,RUFY3,ABLIM3,RIPOR2,ARHGAP24,C…
GO:BP	cell morphogenesis involved in differentiation	GO:0000904	7.61e-09	8.11887	733	642	60	21092	ANOS1,MAP2K1,DLG4,SPG11,BMPR2,PAFAH1B1,LRP8,RELN,CDH2,TRIOBP,NECTIN1,KIAA0319,CUX2,SEMA4A,NUMB,ATRN,CAMK2B,APBB1,STC1,KIF1A,ALCAM,APLP2,MARK2,NRCAM,SPTBN4,ANK3,DPYSL2,ABI1,SLIT3,DIXDC1,ADCY1,PREX2,RERE,TNR,SEMA3D,RUFY3,RIPOR2,COBL,SIN3A,P4HB,PRKDC,SYNGAP1,BCL11B,GAP43,TMEFF1,LHX1,RAB10,FAT1,SHTN1,USP9X,NLGN1,UNC5C,SEMA3A,PLXNA4,FZD3,BRAF,RYK,DAB1,FAT3,SEMA3G
GO:BP	generation of neurons	GO:0048699	8.41e-09	8.07545	1465	642	94	21092	ANOS1,MAP2K1,DLG4,AHI1,SPG11,RPGRIP1L,SOX2,BMPR2,BBS4,PAFAH1B1,MYO6,LRP8,RELN,CDH2,TOX,TRIOBP,KIFAP3,NECTIN1,KIAA0319,DICER1,CUX2,SEMA4A,NUMB,CAMK2B,CAMK2G,DNMT3A,PTK2B,ITSN2,APBB1,KIF1A,ALCAM,APLP2,MARK2,NRCAM,SPTBN4,ANK3,FZD8,DPYSL2,ABI1,SLIT3,DIXDC1,ADCY1,SCLT1,KCNB1,STX1B,TUBB2A,KATNB1,PREX2,RERE,RTN4IP1,RAPGEF1,SOX11,TNR,SEMA3D,RUFY3,RIPOR2,COBL,SIN3A,PLAA,SYNGAP1,BCL11B,ATP2B2,GAP43,TMEFF1,…
GO:BP	neuron development	GO:0048666	1.56e-08	7.80592	1122	642	78	21092	ANOS1,MAP2K1,DLG4,AHI1,SPG11,RPGRIP1L,BMPR2,BBS4,PAFAH1B1,LRP8,RELN,CDH2,TOX,TRIOBP,NECTIN1,KIAA0319,DICER1,CUX2,SEMA4A,NUMB,CAMK2B,CAMK2G,PTK2B,ITSN2,APBB1,KIF1A,ALCAM,APLP2,MARK2,NRCAM,SPTBN4,ANK3,DPYSL2,ABI1,SLIT3,DIXDC1,ADCY1,SCLT1,KCNB1,STX1B,KATNB1,PREX2,RERE,RTN4IP1,RAPGEF1,TNR,SEMA3D,RUFY3,RIPOR2,COBL,SIN3A,PLAA,SYNGAP1,BCL11B,GAP43,TMEFF1,NBL1,LHX1,RAB10,STRN,SHTN1,USP9X,NLGN1,OPCML,LRIG…
GO:BP	neuron differentiation	GO:0030182	1.79e-08	7.74808	1393	642	90	21092	ANOS1,MAP2K1,DLG4,AHI1,SPG11,RPGRIP1L,SOX2,BMPR2,BBS4,PAFAH1B1,MYO6,LRP8,RELN,CDH2,TOX,TRIOBP,NECTIN1,KIAA0319,DICER1,CUX2,SEMA4A,NUMB,CAMK2B,CAMK2G,DNMT3A,PTK2B,ITSN2,APBB1,KIF1A,ALCAM,APLP2,MARK2,NRCAM,SPTBN4,ANK3,FZD8,DPYSL2,ABI1,SLIT3,DIXDC1,ADCY1,SCLT1,KCNB1,STX1B,KATNB1,PREX2,RERE,RTN4IP1,RAPGEF1,SOX11,TNR,SEMA3D,RUFY3,RIPOR2,COBL,SIN3A,PLAA,SYNGAP1,BCL11B,ATP2B2,GAP43,TMEFF1,NBL1,LHX1,SNPH…
GO:BP	cellular component morphogenesis	GO:0032989	1.97e-08	7.7059	770	642	61	21092	ANOS1,MAP2K1,DLG4,SPG11,BMPR2,PAFAH1B1,LRP8,RELN,CDH2,DNM1L,NECTIN1,KIAA0319,DICER1,PIKFYVE,CUX2,SEMA4A,NUBPL,NUMB,CAMK2B,ITSN2,APBB1,KIF1A,ALCAM,APLP2,MARK2,NRCAM,SPTBN4,ANK3,DPYSL2,ABI1,SLIT3,DIXDC1,MFF,ADCY1,KLHL41,PREX2,RERE,TNR,SEMA3D,RUFY3,COBL,SIN3A,PLAA,SYNGAP1,BCL11B,GAP43,TMEFF1,NBL1,LHX1,RAB10,SHTN1,USP9X,NLGN1,UNC5C,SEMA3A,PLXNA4,FZD3,BRAF,RYK,DAB1,SEMA3G
GO:BP	axonogenesis	GO:0007409	4.54e-08	7.34279	442	642	43	21092	ANOS1,MAP2K1,SPG11,BMPR2,PAFAH1B1,RELN,CDH2,NECTIN1,KIAA0319,SEMA4A,NUMB,APBB1,ALCAM,APLP2,MARK2,NRCAM,SPTBN4,ANK3,DPYSL2,SLIT3,DIXDC1,ADCY1,TNR,SEMA3D,RUFY3,COBL,SIN3A,SYNGAP1,BCL11B,GAP43,TMEFF1,LHX1,RAB10,SHTN1,USP9X,UNC5C,SEMA3A,PLXNA4,FZD3,BRAF,RYK,DAB1,SEMA3G
GO:BP	head development	GO:0060322	4.89e-08	7.31111	828	642	63	21092	ATP1A2,ATP1A3,IRS2,NDUFS4,MAP2K1,AHI1,RPGRIP1L,NF2,SOX2,BBS4,PAFAH1B1,ATM,LRP8,RELN,CDH2,TOX,SPTBN2,AFF2,PLEKHA1,NUMB,GART,ATRN,RARG,NRCAM,BCAN,SYNJ1,DPYSL2,ARID5B,ANKRD11,SERPINE2,DIXDC1,ADCY1,NDST1,KCNC1,HPCA,PGAP1,RERE,ATF2,TNR,SPATA5,SLC6A17,SIN3A,PCSK1,SSBP3,PRKDC,BCL11B,ATP2B2,ARCN1,SYNGR3,LHX1,SLC17A7,GRIN2B,EOMES,GPR37L1,PCDH18,UNC5C,SEMA3A,PLXNA4,FZD3,BRAF,RYK,DAB1,HES5
GO:BP	regulation of cellular component organization	GO:0051128	7.36e-08	7.13334	2355	642	128	21092	BRCA1,MAP2K1,DLG4,AHI1,INSR,ABCC8,NF2,BMPR2,DYRK1A,HTT,BBS4,PAFAH1B1,ATM,LRP8,AKAP9,RELN,CDH2,TOX,ADD1,DNM1L,DDX3X,TRIOBP,NECTIN1,FHL1,SPTBN2,KIAA0319,HUWE1,CRBN,INO80,PIKFYVE,TEAD1,CUX2,SMAD7,SEMA4A,SPTAN1,VDAC1,ARRB1,MAPK8,NUMB,CAMK2B,CAMK2G,CAMKK2,HSPA8,PTK2B,ITSN2,DNAJB2,HNRNPK,PFDN5,KIF1A,MARK2,NRCAM,SPTBN4,SYNJ1,DPYSL2,STX5,SERPINE2,SLIT3,DIXDC1,MFF,DDHD2,TUBB4A,SMG6,SVIL,STX1B,HPCA,TBC1D4,…
GO:BP	axon development	GO:0061564	1.06e-07	6.97388	490	642	45	21092	ANOS1,MAP2K1,SPG11,BMPR2,PAFAH1B1,RELN,CDH2,NECTIN1,KIAA0319,SEMA4A,NUMB,APBB1,ALCAM,APLP2,MARK2,NRCAM,SPTBN4,ANK3,DPYSL2,SLIT3,DIXDC1,ADCY1,TNR,SEMA3D,RUFY3,COBL,SIN3A,SYNGAP1,BCL11B,GAP43,TMEFF1,LHX1,RAB10,SHTN1,USP9X,LRIG2,UNC5C,SEMA3A,PLXNA4,FZD3,BRAF,GRM7,RYK,DAB1,SEMA3G
GO:BP	regulation of ion transport	GO:0043269	1.13e-07	6.94563	702	642	56	21092	ATP1A2,DLG4,PKD2,ABCC8,SPG11,KCNH2,PKP2,HTT,CACNA1A,AKAP9,RELN,SCN1A,KCND1,SCN9A,FXYD6,FHL1,NOS1AP,GNAI2,CACNB2,CLCN2,CRBN,OPRM1,GPD1L,VDAC1,CAMK2B,CAMK2G,PTK2B,STC1,DAPK1,SPTBN4,ANK3,RASGRF2,TRPC3,TRPC1,TRDN,SERPINE2,CACNA2D2,KCNB1,KCNC1,HPCA,CACNA1B,KCNAB1,AHNAK,DIAPH1,SUMO1,SYT11,GRIN2B,WNK3,NLGN1,ATP1A1,CACNA1E,SCN3A,KCNB2,CACNA1I,GRM7,JPH1
GO:BP	positive regulation of biological process	GO:0048518	1.48e-07	6.82863	6309	642	268	21092	BRCA1,STAT5B,ATP1A2,IRS2,NDUFS4,MAP2K1,DLG4,PKD2,AHI1,TARDBP,INSR,ABCC8,KCNH2,SLC22A5,PKP2,NF2,SOX2,EIF2B4,BMPR2,DYRK1A,HTT,BBS4,HPS4,PAFAH1B1,NSD1,ATM,MYO6,LRP8,USF1,AKAP9,PCDH11Y,LIFR,RELN,CDH2,TOX,ADD1,PPP2R1B,DNM1L,KLF6,SLC4A4,SIX5,MBTPS2,DDX3X,LPIN1,TRIOBP,KIFAP3,PRICKLE1,FHL1,NOS1AP,GNAI2,CACNB2,KIAA0319,HUWE1,DICER1,MED14,LTBP3,CRBN,INHA,MOSPD2,INO80,OPRM1,ZFX,TEAD1,ATG16L1,CUX2,SMAD7,GPD1…
GO:BP	regulation of transmembrane transport	GO:0034762	2.73e-07	6.56447	580	642	49	21092	ATP1A2,IRS2,DLG4,PKD2,INSR,ABCC8,KCNH2,HTT,CACNA1A,AKAP9,RELN,SCN1A,KCND1,SCN9A,FHL1,NOS1AP,CACNB2,CLCN2,CRBN,OPRM1,GPD1L,VDAC1,PTK2B,DAPK1,ANK3,RASGRF2,TRPC3,TRPC1,TRDN,SORBS1,CACNA2D2,KCNB1,KCNC1,HPCA,CACNA1B,KCNAB1,APPL1,AHNAK,DIAPH1,SUMO1,GRIN2B,WNK3,NLGN1,CACNA1E,SCN3A,KCNB2,CACNA1I,BRAF,JPH1
GO:BP	multicellular organismal process	GO:0032501	3.62e-07	6.44127	7463	642	304	21092	BRCA1,SMC1A,ANOS1,STAT5B,FANCL,PHEX,ATP1A2,ATP1A3,IRS2,NDUFS4,MAP2K1,DLG4,FBXO11,PKD2,AHI1,FKTN,INSR,ABCC8,SPG11,SGCZ,KCNH2,SLC22A5,RPGRIP1L,PKP2,NF2,SOX2,EIF2B4,BMPR2,DYRK1A,HTT,BBS4,HPS4,PAFAH1B1,ATM,MYO6,ADCY9,LRP8,NHS,USF1,AKAP9,PCDH11Y,GABRA4,RELN,SCN1A,CDH2,TOX,ADD1,TUSC3,PAPSS2,DNM1L,MCC,KLF6,SEPTIN6,SLC4A4,VCAN,SIX5,MBTPS2,SCN9A,CHD2,DDX3X,LPIN1,TRIOBP,KIFAP3,KRIT1,PRICKLE1,NECTIN1,NOS1AP…
GO:BP	positive regulation of cellular process	GO:0048522	3.62e-07	6.44072	5641	642	244	21092	BRCA1,STAT5B,IRS2,NDUFS4,MAP2K1,DLG4,PKD2,AHI1,TARDBP,INSR,ABCC8,KCNH2,NF2,SOX2,BMPR2,DYRK1A,HTT,BBS4,HPS4,PAFAH1B1,NSD1,ATM,MYO6,LRP8,USF1,AKAP9,PCDH11Y,LIFR,RELN,CDH2,TOX,ADD1,PPP2R1B,DNM1L,KLF6,SLC4A4,SIX5,MBTPS2,DDX3X,LPIN1,TRIOBP,KIFAP3,PRICKLE1,NOS1AP,GNAI2,CACNB2,KIAA0319,HUWE1,DICER1,MED14,LTBP3,CRBN,INHA,MOSPD2,INO80,OPRM1,ZFX,TEAD1,ATG16L1,CUX2,SMAD7,GPD1L,PABPC1,NUCKS1,SEMA4A,VDAC1,DOC…
GO:BP	metal ion transport	GO:0030001	4.11e-07	6.38577	893	642	64	21092	ATP1A2,ATP1A3,PKD2,ABCC8,SPG11,KCNH2,SLC22A5,PKP2,HTT,CACNA1A,AKAP9,SCN1A,TUSC3,DNM1L,KCND1,SLC4A4,SCN9A,KCNK9,NECTIN1,FHL1,NOS1AP,GNAI2,CACNB2,CRBN,OPRM1,GPD1L,VDAC1,CAMK2B,CAMK2G,PTK2B,STC1,SPTBN4,ANK3,TRPC3,TRPC1,TRDN,SLC24A1,KLHL3,SERPINE2,CACNA2D2,KCNB1,KCNC1,HPCA,CACNA1B,KCNAB1,AHNAK,SLC6A17,DIAPH1,ATP2B2,SUMO1,SLC17A7,GRIN2B,WNK3,NALF1,ATP1A1,CACNA1E,SCN3A,KCNB2,CACNA1I,RYR3,JPH1,CLTC,PANX…
GO:BP	regulation of ion transmembrane transport	GO:0034765	5.7e-07	6.24415	497	642	44	21092	ATP1A2,DLG4,PKD2,ABCC8,KCNH2,HTT,CACNA1A,AKAP9,RELN,SCN1A,KCND1,SCN9A,FHL1,NOS1AP,CACNB2,CLCN2,CRBN,OPRM1,GPD1L,VDAC1,PTK2B,DAPK1,ANK3,RASGRF2,TRPC3,TRPC1,TRDN,CACNA2D2,KCNB1,KCNC1,HPCA,CACNA1B,KCNAB1,AHNAK,DIAPH1,SUMO1,GRIN2B,WNK3,NLGN1,CACNA1E,SCN3A,KCNB2,CACNA1I,JPH1
GO:BP	brain development	GO:0007420	7.75e-07	6.11063	780	642	58	21092	ATP1A2,ATP1A3,IRS2,NDUFS4,MAP2K1,AHI1,RPGRIP1L,NF2,SOX2,BBS4,PAFAH1B1,ATM,LRP8,RELN,CDH2,TOX,SPTBN2,AFF2,NUMB,GART,ATRN,NRCAM,BCAN,SYNJ1,DPYSL2,SERPINE2,DIXDC1,ADCY1,NDST1,KCNC1,HPCA,PGAP1,RERE,ATF2,TNR,SPATA5,SLC6A17,SIN3A,PCSK1,SSBP3,PRKDC,BCL11B,ATP2B2,ARCN1,SYNGR3,LHX1,SLC17A7,GRIN2B,EOMES,GPR37L1,PCDH18,UNC5C,SEMA3A,PLXNA4,FZD3,RYK,DAB1,HES5
GO:BP	regulation of biological quality	GO:0065008	1.3317e-06	5.87559	3726	642	175	21092	STAT5B,ATP1A2,ATP1A3,IRS2,DLG4,PKD2,TARDBP,INSR,ABCC8,GPHN,SGCZ,KCNH2,SLC22A5,PKP2,NF2,BMPR2,HTT,BBS4,HPS4,PAFAH1B1,GRIK3,LRP8,CACNA1A,USF1,AKAP9,GABRA4,RELN,SCN1A,CDH2,ADD1,PAPSS2,RPS24,SLC4A4,SCN9A,DDX3X,KCNK9,LPIN1,TRIOBP,KRIT1,RAP1GAP2,NECTIN1,FHL1,NOS1AP,GNAI2,SPTBN2,CACNB2,KIAA0319,CLCN2,LTBP3,INHA,MYH7B,OPRM1,CUX2,SMAD7,GPD1L,PABPC1,NUCKS1,SEMA4A,SPTAN1,PLEKHA1,GNAQ,DOCK4,KCTD7,MAPK8,NUMB,…
GO:BP	cell development	GO:0048468	1.9551e-06	5.70884	2142	642	115	21092	ANOS1,MAP2K1,DLG4,AHI1,ABCC8,SPG11,SGCZ,RPGRIP1L,NF2,EIF2B4,BMPR2,BBS4,PAFAH1B1,ATM,LRP8,RELN,CDH2,TOX,ADD1,SIX5,TRIOBP,KIFAP3,NECTIN1,KIAA0319,DICER1,OPRM1,CUX2,SMAD7,SEMA4A,NUMB,ATRN,CAMK2B,CAMK2G,PTK2B,ITSN2,APBB1,SORBS2,STC1,KIF1A,ALCAM,APLP2,MARK2,RARG,NRCAM,SPTBN4,ANK3,SYNJ1,DPYSL2,ABI1,ARID5B,AFF4,NACA,SERPINE2,SLIT3,NR1D1,DIXDC1,DNAJB11,ADCY1,SCLT1,KCNB1,STX1B,KLHL41,KATNB1,PREX2,RERE,RTN…
GO:BP	regulation of neurogenesis	GO:0050767	2.0188e-06	5.6949	370	642	36	21092	MAP2K1,ABCC8,NF2,BMPR2,PAFAH1B1,LRP8,RELN,KIFAP3,KIAA0319,DICER1,OPRM1,CUX2,SEMA4A,NUMB,CAMK2B,SYNJ1,SERPINE2,NR1D1,DIXDC1,DNAJB11,SOX11,TNR,SEMA3D,RUFY3,SYNGAP1,SHTN1,GPR37L1,SEMA3A,PLXNA4,NTRK3,FZD3,BRAF,RYK,DAB1,HES5,SEMA3G
GO:BP	central nervous system development	GO:0007417	2.3471e-06	5.62947	1065	642	70	21092	ATP1A2,ATP1A3,IRS2,NDUFS4,MAP2K1,PKD2,AHI1,SPG11,RPGRIP1L,NF2,SOX2,EIF2B4,BBS4,PAFAH1B1,ATM,LRP8,RELN,CDH2,TOX,VCAN,SPTBN2,AFF2,NUMB,GART,ATRN,APLP2,NRCAM,SPTBN4,BCAN,SYNJ1,DPYSL2,SERPINE2,NR1D1,DIXDC1,ADCY1,NDST1,KCNC1,HPCA,PGAP1,RERE,ATF2,SOX11,TNR,SPATA5,SLC6A17,SIN3A,PCSK1,SSBP3,PRKDC,BCL11B,ATP2B2,ARCN1,GAP43,SYNGR3,LHX1,SLC17A7,GRIN2B,EOMES,GPR37L1,PCDH18,UNC5C,SEMA3A,PLXNA4,NTRK3,FZD3,POU6…
GO:BP	cellular developmental process	GO:0048869	3.5162e-06	5.45392	4280	642	193	21092	ANOS1,STAT5B,MAP2K1,DLG4,AHI1,ABCC8,SPG11,SGCZ,RPGRIP1L,PKP2,NF2,SOX2,EIF2B4,BMPR2,BBS4,HPS4,PAFAH1B1,ATM,MYO6,LRP8,NHS,RELN,CDH2,TOX,ADD1,DNM1L,ALDH6A1,KLF6,SEPTIN6,VCAN,SIX5,CHD2,DDX3X,TRIOBP,KIFAP3,PRICKLE1,NECTIN1,FHL1,KIAA0319,HUWE1,DICER1,CLCN2,LTBP3,INHA,KIFBP,ARHGEF28,PIKFYVE,OPRM1,CUX2,SMAD7,VIPAS39,SEMA4A,VDAC1,PLEKHA1,TST,SORT1,NUBPL,NUMB,CREM,NFATC3,ATRN,CAMK2B,CAMK2G,DNMT3A,PTK2B,ITS…
GO:BP	localization	GO:0051179	4.1691e-06	5.37996	5540	642	236	21092	STAT5B,ATP1A2,ATP1A3,KIF1B,IRS2,LRPPRC,PRG4,MAP2K1,DLG4,PEX3,PKD2,AHI1,TARDBP,INSR,ABCC8,GPHN,SPG11,KCNH2,SLC22A5,PKP2,NF2,HTT,BBS4,HGSNAT,HPS4,PAFAH1B1,ATM,MYO6,GRIK3,LRP8,CACNA1A,AKAP9,SLC25A3,GABRA4,RELN,SCN1A,CDH2,SNCB,TUSC3,DNM1L,MCC,KCND1,SEPTIN6,SLC4A4,SCN9A,DDX3X,KCNK9,KIFAP3,PRICKLE1,FXYD6,NECTIN1,FHL1,NOS1AP,GNAI2,SPTBN2,CACNB2,SLC35A1,HUWE1,CLCN2,CRBN,INHA,KIFBP,PIKFYVE,OPRM1,ATG16L1,S…
GO:BP	regulation of cell development	GO:0060284	4.6183e-06	5.33552	512	642	43	21092	MAP2K1,ABCC8,NF2,BMPR2,PAFAH1B1,LRP8,RELN,ADD1,TRIOBP,KIFAP3,KIAA0319,DICER1,OPRM1,CUX2,SMAD7,SEMA4A,NUMB,CAMK2B,SYNJ1,NACA,SERPINE2,NR1D1,DIXDC1,DNAJB11,SOX11,TNR,SEMA3D,RUFY3,P4HB,PRKDC,SYNGAP1,NPPC,SHTN1,GPR37L1,SEMA3A,PLXNA4,NTRK3,FZD3,BRAF,RYK,DAB1,HES5,SEMA3G
GO:BP	cation transport	GO:0006812	5.0641e-06	5.2955	1199	642	75	21092	ATP1A2,ATP1A3,DLG4,PKD2,ABCC8,SPG11,KCNH2,SLC22A5,PKP2,HTT,CACNA1A,AKAP9,SLC25A3,RELN,SCN1A,TUSC3,DNM1L,KCND1,SLC4A4,SCN9A,KCNK9,NECTIN1,FHL1,NOS1AP,GNAI2,CACNB2,CRBN,OPRM1,GPD1L,VDAC1,ANO10,CAMK2B,CAMK2G,PTK2B,STC1,DAPK1,SPTBN4,ANK3,RASGRF2,TRPC3,TRPC1,TRDN,SLC24A1,KLHL3,SERPINE2,CACNA2D2,KCNB1,KCNC1,HPCA,CACNA1B,KCNAB1,SEC14L1,AHNAK,SLC6A17,DIAPH1,ATP2B2,SUMO1,SLC7A10,SLC17A7,SYT11,GRIN2B,WNK3,…
GO:BP	establishment of localization	GO:0051234	5.9407e-06	5.22616	4913	642	214	21092	STAT5B,ATP1A2,ATP1A3,KIF1B,IRS2,LRPPRC,PRG4,MAP2K1,DLG4,PEX3,PKD2,AHI1,TARDBP,INSR,ABCC8,SPG11,KCNH2,SLC22A5,PKP2,HTT,BBS4,HGSNAT,HPS4,PAFAH1B1,ATM,MYO6,GRIK3,LRP8,CACNA1A,AKAP9,SLC25A3,GABRA4,RELN,SCN1A,CDH2,SNCB,TUSC3,DNM1L,MCC,KCND1,SLC4A4,SCN9A,KCNK9,KIFAP3,PRICKLE1,FXYD6,NECTIN1,FHL1,NOS1AP,GNAI2,SPTBN2,CACNB2,SLC35A1,HUWE1,CLCN2,CRBN,INHA,KIFBP,PIKFYVE,OPRM1,ATG16L1,PRSS12,NUP214,GPD1L,VIPA…
GO:BP	regulation of neuron projection development	GO:0010975	7.5776e-06	5.12047	444	642	39	21092	MAP2K1,BMPR2,PAFAH1B1,LRP8,RELN,CDH2,TOX,KIAA0319,CUX2,SEMA4A,CAMK2B,CAMK2G,PTK2B,KIF1A,MARK2,NRCAM,DPYSL2,DIXDC1,STX1B,KATNB1,RTN4IP1,RAPGEF1,TNR,SEMA3D,RUFY3,COBL,SYNGAP1,SHTN1,NLGN1,LRIG2,SEMA3A,PLXNA4,NTRK3,BRAF,ITGA3,RYK,DAB1,FAT3,SEMA3G
GO:BP	neuron migration	GO:0001764	1.0507e-05	4.97851	177	642	23	21092	BBS4,PAFAH1B1,RELN,KIAA0319,CAMK2B,MARK2,NRCAM,TUBB2A,PLAA,LHX1,SH3RF1,SCRT2,EOMES,SHTN1,USP9X,LRIG2,UNC5C,SEMA3A,NTRK3,FZD3,ITGA3,DAB1,FAT3
GO:BP	regulation of nervous system development	GO:0051960	1.1737e-05	4.93043	451	642	39	21092	MAP2K1,ABCC8,NF2,BMPR2,PAFAH1B1,LRP8,RELN,LPIN1,KIFAP3,KIAA0319,DICER1,OPRM1,CUX2,SEMA4A,NUMB,CAMK2B,RARG,SYNJ1,SERPINE2,NR1D1,DIXDC1,DNAJB11,SOX11,TNR,SEMA3D,RUFY3,SYNGAP1,SHTN1,GPR37L1,NLGN1,SEMA3A,PLXNA4,NTRK3,FZD3,BRAF,RYK,DAB1,HES5,SEMA3G
GO:BP	transport	GO:0006810	1.3532e-05	4.86864	4755	642	207	21092	STAT5B,ATP1A2,ATP1A3,KIF1B,IRS2,LRPPRC,PRG4,MAP2K1,DLG4,PEX3,PKD2,AHI1,TARDBP,INSR,ABCC8,SPG11,KCNH2,SLC22A5,PKP2,HTT,BBS4,HGSNAT,HPS4,PAFAH1B1,MYO6,GRIK3,LRP8,CACNA1A,AKAP9,SLC25A3,GABRA4,RELN,SCN1A,CDH2,SNCB,TUSC3,DNM1L,KCND1,SLC4A4,SCN9A,KCNK9,KIFAP3,PRICKLE1,FXYD6,NECTIN1,FHL1,NOS1AP,GNAI2,SPTBN2,CACNB2,SLC35A1,HUWE1,CLCN2,CRBN,INHA,KIFBP,PIKFYVE,OPRM1,ATG16L1,PRSS12,NUP214,GPD1L,VIPAS39,VDAC…
GO:BP	axon extension	GO:0048675	1.4825e-05	4.82901	124	642	19	21092	SPG11,BMPR2,PAFAH1B1,KIAA0319,SEMA4A,ALCAM,NRCAM,DPYSL2,SLIT3,TNR,SEMA3D,RUFY3,SIN3A,SHTN1,USP9X,SEMA3A,PLXNA4,RYK,SEMA3G
GO:BP	regulation of primary metabolic process	GO:0080090	1.9096e-05	4.71905	5869	642	244	21092	BRCA1,ANOS1,STAT5B,FHIT,IRS2,NDUFS4,ZNF41,LRPPRC,UTP4,MAP2K1,DLG4,PKD2,AHI1,TARDBP,FKTN,ELP1,INSR,KCNH2,NF2,SOX2,EIF2B4,BMPR2,DYRK1A,HTT,BBS4,NSD1,ATM,MYO6,JAZF1,LRP8,USF1,AKAP9,RELN,TOX,DNM1L,KLF6,SLC4A4,SIX5,MBTPS2,CHD2,DDX3X,LPIN1,PRICKLE1,NOS1AP,GNAI2,HUWE1,DICER1,AFF2,MED14,CLCN2,MSH3,TSFM,INHA,RAD52,INO80,ZFX,TEAD1,CUX2,EWSR1,SMAD7,MED13L,GPD1L,PABPC1,NUCKS1,GNAQ,ARRB1,ATAD2B,MAPK8,CREM,NFA…
GO:BP	cell differentiation	GO:0030154	1.9537e-05	4.70915	4256	642	189	21092	ANOS1,STAT5B,MAP2K1,DLG4,AHI1,ABCC8,SPG11,SGCZ,RPGRIP1L,PKP2,NF2,SOX2,EIF2B4,BMPR2,BBS4,HPS4,PAFAH1B1,ATM,MYO6,LRP8,NHS,RELN,CDH2,TOX,ADD1,ALDH6A1,KLF6,SEPTIN6,VCAN,SIX5,CHD2,DDX3X,TRIOBP,KIFAP3,PRICKLE1,NECTIN1,FHL1,KIAA0319,HUWE1,DICER1,CLCN2,LTBP3,INHA,KIFBP,ARHGEF28,OPRM1,CUX2,SMAD7,VIPAS39,SEMA4A,VDAC1,PLEKHA1,TST,SORT1,NUMB,CREM,NFATC3,ATRN,CAMK2B,CAMK2G,DNMT3A,PTK2B,ITSN2,APBB1,SORBS2,STC1…
GO:BP	cellular process	GO:0009987	2.0286e-05	4.69281	19221	642	621	21092	BRCA1,SMC1A,ANOS1,STAT5B,HADHB,FANCL,FHIT,PHEX,ATP1A2,ATP1A3,KIF1B,PRCC,IRS2,GK,NDUFS4,ZNF41,LRPPRC,UTP4,MAP2K1,PC,DLG4,FBXO11,PEX3,PKD2,AHI1,FIP1L1,COL6A2,TARDBP,FKTN,PCCA,ELP1,DPYD,INSR,ABCC8,GPHN,SPG11,SGCZ,KCNH2,SLC22A5,RPGRIP1L,PKP2,GAN,NF2,SOX2,IMPDH1,EIF2B4,BMPR2,DDB2,DYRK1A,HTT,BBS4,HGSNAT,HPS4,PAFAH1B1,NSD1,ATM,MYO6,ADCY9,GRIK3,JAZF1,LRP8,NHS,CACNA1A,USF1,AKAP9,PCDH11Y,SLC25A3,GABRA4,GBE…
GO:BP	regulation of membrane potential	GO:0042391	2.2901e-05	4.64015	424	642	37	21092	ATP1A2,ATP1A3,DLG4,KCNH2,PKP2,GRIK3,AKAP9,GABRA4,RELN,SCN1A,SLC4A4,SCN9A,KCNK9,FHL1,NOS1AP,CACNB2,OPRM1,CUX2,SMAD7,GPD1L,GNAQ,KCTD7,PTK2B,NRCAM,ANK3,TRDN,KCNB1,KCNC1,STX1B,SUMO1,INSYN2A,GRIN2B,NLGN1,ATP1A1,SCN3A,CACNA1I,UNC13B
GO:BP	developmental growth	GO:0048589	2.8215e-05	4.54952	646	642	48	21092	STAT5B,INSR,SPG11,SOX2,BMPR2,BBS4,PAFAH1B1,ATM,ADD1,SPTBN2,KIAA0319,SMAD7,SEMA4A,PLEKHA1,ATRN,ITSN2,SORBS2,STC1,ALCAM,RARG,NRCAM,SPTBN4,DPYSL2,ARID5B,NACA,GAS1,SLIT3,ATF2,RASAL2,TNR,SEMA3D,RUFY3,COBL,SIN3A,POR,PLAA,GAP43,LHX1,NINJ2,NPPC,SHTN1,USP9X,SEMA3A,PLXNA4,RYK,FTO,RTF1,SEMA3G
GO:BP	negative regulation of neurogenesis	GO:0050768	2.9817e-05	4.52553	143	642	20	21092	ABCC8,NF2,KIFAP3,KIAA0319,DICER1,SEMA4A,NR1D1,DNAJB11,SOX11,TNR,SEMA3D,RUFY3,SYNGAP1,GPR37L1,SEMA3A,NTRK3,RYK,DAB1,HES5,SEMA3G
GO:BP	regulation of cell projection organization	GO:0031344	3.5924e-05	4.44462	651	642	48	21092	MAP2K1,DLG4,BMPR2,HTT,BBS4,PAFAH1B1,LRP8,RELN,CDH2,TOX,KIAA0319,CUX2,SEMA4A,CAMK2B,CAMK2G,PTK2B,KIF1A,MARK2,NRCAM,DPYSL2,DIXDC1,STX1B,KATNB1,RTN4IP1,RAPGEF1,TNR,SEMA3D,RUFY3,RIPOR2,ARHGAP24,COBL,KCTD17,SYNGAP1,GAP43,GRIN2B,SHTN1,NLGN1,LRIG2,SEMA3A,PLXNA4,NTRK3,BRAF,ITGA3,RYK,PFN1,DAB1,FAT3,SEMA3G
GO:BP	negative regulation of biological process	GO:0048519	4.2079e-05	4.37594	5918	642	244	21092	BRCA1,ANOS1,STAT5B,FHIT,ATP1A2,IRS2,LRPPRC,MAP2K1,PC,DLG4,PKD2,AHI1,TARDBP,FKTN,ABCC8,KCNH2,RPGRIP1L,PKP2,NF2,SOX2,BMPR2,DYRK1A,HTT,BBS4,PAFAH1B1,NSD1,ATM,GRIK3,JAZF1,USF1,GBE1,CDH2,ADD1,SNCB,MCC,SIX5,SCN9A,DDX3X,LPIN1,TRIOBP,KIFAP3,KRIT1,PRICKLE1,FHL1,GNAI2,SPTBN2,KIAA0319,HUWE1,DICER1,AFF2,LTBP3,MTMR8,MSH3,CRBN,INHA,OPRM1,LRCH1,CUX2,SMAD7,GPD1L,TTC37,PABPC1,SEMA4A,SPTAN1,VDAC1,PLEKHA1,GNAQ,DOCK…
GO:BP	regulation of cellular metabolic process	GO:0031323	4.2935e-05	4.36718	5649	642	235	21092	BRCA1,STAT5B,FHIT,IRS2,NDUFS4,ZNF41,LRPPRC,UTP4,MAP2K1,DLG4,PKD2,AHI1,TARDBP,FKTN,ELP1,INSR,KCNH2,NF2,SOX2,EIF2B4,BMPR2,DYRK1A,HTT,NSD1,ATM,MYO6,JAZF1,LRP8,USF1,AKAP9,RELN,TOX,DNM1L,KLF6,SLC4A4,SIX5,MBTPS2,CHD2,DDX3X,LPIN1,PRICKLE1,NOS1AP,GNAI2,DICER1,AFF2,MED14,CLCN2,MTMR8,MSH3,TSFM,INHA,RAD52,INO80,PIKFYVE,OPRM1,ZFX,TEAD1,ATG16L1,CUX2,EWSR1,SMAD7,MED13L,GPD1L,PABPC1,NUCKS1,VDAC1,GNAQ,ARRB1,ATAD…
GO:BP	developmental cell growth	GO:0048588	4.3534e-05	4.36117	222	642	25	21092	SPG11,BMPR2,PAFAH1B1,KIAA0319,SMAD7,SEMA4A,ITSN2,SORBS2,ALCAM,RARG,NRCAM,DPYSL2,SLIT3,TNR,SEMA3D,RUFY3,COBL,SIN3A,PLAA,SHTN1,USP9X,SEMA3A,PLXNA4,RYK,SEMA3G
GO:BP	regulation of plasma membrane bounded cell projection organization	GO:0120035	4.5286e-05	4.34404	635	642	47	21092	MAP2K1,BMPR2,HTT,BBS4,PAFAH1B1,LRP8,RELN,CDH2,TOX,KIAA0319,CUX2,SEMA4A,CAMK2B,CAMK2G,PTK2B,KIF1A,MARK2,NRCAM,DPYSL2,DIXDC1,STX1B,KATNB1,RTN4IP1,RAPGEF1,TNR,SEMA3D,RUFY3,RIPOR2,ARHGAP24,COBL,KCTD17,SYNGAP1,GAP43,GRIN2B,SHTN1,NLGN1,LRIG2,SEMA3A,PLXNA4,NTRK3,BRAF,ITGA3,RYK,PFN1,DAB1,FAT3,SEMA3G
GO:BP	negative regulation of nervous system development	GO:0051961	5.4045e-05	4.26725	148	642	20	21092	ABCC8,NF2,KIFAP3,KIAA0319,DICER1,SEMA4A,NR1D1,DNAJB11,SOX11,TNR,SEMA3D,RUFY3,SYNGAP1,GPR37L1,SEMA3A,NTRK3,RYK,DAB1,HES5,SEMA3G
GO:BP	cell junction organization	GO:0034330	5.69e-05	4.24489	703	642	50	21092	DLG4,INSR,ABCC8,GPHN,SPG11,PKP2,NF2,PAFAH1B1,LRP8,RELN,CDH2,ADD1,SNCB,NECTIN1,NOS1AP,SPTBN2,CACNB2,CUX2,SMAD7,SEMA4A,NUMB,CAMK2B,HSPA8,PTK2B,KIF1A,NRCAM,ANK3,BCAN,TLN2,SORBS1,MAPRE2,PCLO,RAPGEF1,TNR,LRFN5,CHD4,SYNGAP1,GAP43,ITGA5,GRIN2B,IRX3,STRN,NLGN1,NTRK3,NFIA,ITGA3,RYK,PFN1,UNC13B,CDH20
GO:BP	regulation of biosynthetic process	GO:0009889	6.1013e-05	4.21458	4175	642	184	21092	BRCA1,STAT5B,IRS2,ZNF41,LRPPRC,UTP4,MAP2K1,PKD2,AHI1,TARDBP,FKTN,ELP1,INSR,KCNH2,SOX2,EIF2B4,BMPR2,DYRK1A,NSD1,ATM,MYO6,JAZF1,LRP8,USF1,RELN,TOX,KLF6,SIX5,MBTPS2,CHD2,DDX3X,LPIN1,PRICKLE1,NOS1AP,DICER1,MED14,CLCN2,TSFM,INO80,PIKFYVE,OPRM1,ZFX,TEAD1,CUX2,EWSR1,SMAD7,MED13L,PABPC1,NUCKS1,ARRB1,ATAD2B,MAPK8,CREM,NFATC3,USF2,CAMKK2,DNMT3A,HSPA8,GPBP1,PTK2B,HNRNPK,NFX1,HSF2,APBB1,PFDN5,PSPC1,RARG,DAPK…
GO:BP	regulation of nitrogen compound metabolic process	GO:0051171	6.6227e-05	4.17897	5706	642	236	21092	BRCA1,ANOS1,STAT5B,FHIT,NDUFS4,ZNF41,LRPPRC,UTP4,MAP2K1,DLG4,PKD2,AHI1,TARDBP,FKTN,ELP1,INSR,KCNH2,NF2,SOX2,EIF2B4,BMPR2,DYRK1A,HTT,NSD1,ATM,MYO6,JAZF1,LRP8,USF1,AKAP9,RELN,TOX,DNM1L,KLF6,SLC4A4,SIX5,MBTPS2,CHD2,DDX3X,LPIN1,PRICKLE1,NOS1AP,GNAI2,HUWE1,DICER1,AFF2,MED14,MSH3,TSFM,INHA,RAD52,INO80,OPRM1,ZFX,TEAD1,CUX2,EWSR1,SMAD7,MED13L,GPD1L,PABPC1,NUCKS1,GNAQ,ARRB1,ATAD2B,MAPK8,CREM,NFATC3,USF2,C…
GO:BP	regulation of developmental process	GO:0050793	8.059e-05	4.09372	2499	642	123	21092	BRCA1,STAT5B,MAP2K1,DLG4,AHI1,INSR,ABCC8,PKP2,NF2,SOX2,BMPR2,BBS4,PAFAH1B1,LRP8,RELN,CDH2,TOX,ADD1,DNM1L,LPIN1,TRIOBP,KIFAP3,KRIT1,PRICKLE1,KIAA0319,HUWE1,DICER1,LTBP3,INHA,INO80,OPRM1,CUX2,SMAD7,SEMA4A,SORT1,NUMB,NFATC3,ATRN,CAMK2B,PTK2B,ITSN2,KIF1A,MARK2,RARG,NRCAM,SPTBN4,BRWD1,SYNJ1,DPYSL2,NACA,PRICKLE2,SERPINE2,NR1D1,DIXDC1,MFF,DDHD2,DNAJB11,POGLUT1,KLHL41,MYH10,ATF2,RTN4IP1,SOX11,TNR,GATAD2B…
GO:BP	regulation of cellular biosynthetic process	GO:0031326	9.5569e-05	4.01968	4114	642	181	21092	BRCA1,STAT5B,IRS2,ZNF41,LRPPRC,UTP4,MAP2K1,PKD2,AHI1,TARDBP,FKTN,ELP1,INSR,KCNH2,SOX2,EIF2B4,BMPR2,DYRK1A,NSD1,ATM,MYO6,JAZF1,LRP8,USF1,RELN,TOX,KLF6,SIX5,MBTPS2,CHD2,DDX3X,LPIN1,PRICKLE1,NOS1AP,DICER1,MED14,CLCN2,TSFM,INO80,OPRM1,ZFX,TEAD1,CUX2,EWSR1,SMAD7,MED13L,PABPC1,NUCKS1,ARRB1,ATAD2B,MAPK8,CREM,NFATC3,USF2,CAMKK2,DNMT3A,HSPA8,GPBP1,PTK2B,HNRNPK,NFX1,HSF2,APBB1,PFDN5,PSPC1,RARG,DAPK1,BRWD1,…
GO:BP	regulation of molecular function	GO:0065009	0.00011108	3.95434	3055	642	143	21092	ANOS1,ATP1A2,IRS2,MAP2K1,DLG4,PKD2,INSR,ABCC8,NF2,SOX2,EIF2B4,BMPR2,HTT,BBS4,HPS4,PAFAH1B1,NSD1,LRP8,AKAP9,RELN,ADD1,PPP2R1B,SNCB,DNM1L,MBTPS2,DDX3X,LPIN1,KRIT1,RAP1GAP2,MYO9B,FHL1,NOS1AP,GNAI2,CACNB2,MSH3,CRBN,ARHGEF9,ARHGEF28,OPRM1,LRCH1,SMAD7,GPD1L,NUCKS1,GNAQ,DOCK4,KCTD7,ARRB1,SORT1,MAPK8,PPP2R2C,RGS6,CABP1,CAMKK2,PTK2B,ITSN2,DNAJB2,HNRNPK,APLP2,MARK2,DAPK1,GIT2,ANK3,FZD8,ABI1,ARID5B,RASGRF2,…
GO:BP	regulation of anatomical structure morphogenesis	GO:0022603	0.00012075	3.91812	919	642	59	21092	BRCA1,MAP2K1,DLG4,AHI1,ABCC8,BMPR2,PAFAH1B1,LRP8,RELN,CDH2,DNM1L,TRIOBP,KRIT1,PRICKLE1,KIAA0319,HUWE1,CUX2,SEMA4A,CAMK2B,PTK2B,ITSN2,KIF1A,MARK2,BRWD1,PRICKLE2,DIXDC1,MFF,DDHD2,POGLUT1,MYH10,ATF2,TNR,SEMA3D,RUFY3,P4HB,BTBD7,PLAA,ECSCR,PRKDC,SYNGAP1,DIAPH1,ADAMTS9,ITGA5,VEGFB,LHX1,PHIP,FGD6,SHTN1,NLGN1,SEMA3A,PLXNA4,MTDH,ADAM12,FZD3,BRAF,RYK,DAB1,FITM2,SEMA3G
GO:BP	regulation of transporter activity	GO:0032409	0.00012279	3.91085	285	642	28	21092	ATP1A2,DLG4,PKD2,ABCC8,HTT,AKAP9,RELN,FHL1,NOS1AP,CACNB2,CRBN,OPRM1,GPD1L,KCTD7,PTK2B,DAPK1,ANK3,RASGRF2,TRDN,KCNC1,HPCA,KCNAB1,AHNAK,SUMO1,SYNGR3,WNK3,NLGN1,JPH1
GO:BP	animal organ development	GO:0048513	0.00012917	3.88883	3591	642	162	21092	STAT5B,PHEX,ATP1A2,ATP1A3,IRS2,NDUFS4,MAP2K1,PKD2,AHI1,FKTN,INSR,SPG11,SGCZ,RPGRIP1L,PKP2,NF2,SOX2,EIF2B4,BMPR2,BBS4,PAFAH1B1,ATM,MYO6,LRP8,NHS,RELN,CDH2,TOX,ADD1,PAPSS2,KLF6,SIX5,MBTPS2,CHD2,LPIN1,TRIOBP,PRICKLE1,NECTIN1,FHL1,SPTBN2,AFF2,CLCN2,LTBP3,INHA,TEAD1,ADAMTS2,SMAD7,SEMA4A,PLEKHA1,MAB21L1,NUMB,GART,MYL6,USF2,ATRN,PTK2B,PFDN5,SORBS2,STC1,RARG,ABLIM1,NRCAM,FZD8,BCAN,SYNJ1,DPYSL2,ABI1,ARID5…
GO:BP	regulation of metal ion transport	GO:0010959	0.00015256	3.81656	398	642	34	21092	ATP1A2,PKD2,ABCC8,SPG11,KCNH2,PKP2,HTT,AKAP9,FHL1,NOS1AP,GNAI2,CACNB2,CRBN,GPD1L,VDAC1,CAMK2B,CAMK2G,PTK2B,STC1,SPTBN4,ANK3,TRPC3,TRPC1,TRDN,SERPINE2,KCNC1,HPCA,KCNAB1,AHNAK,DIAPH1,SUMO1,WNK3,ATP1A1,JPH1
GO:BP	neuron projection extension	GO:1990138	0.00016243	3.78934	173	642	21	21092	SPG11,BMPR2,PAFAH1B1,KIAA0319,SEMA4A,ITSN2,ALCAM,NRCAM,DPYSL2,SLIT3,TNR,SEMA3D,RUFY3,SIN3A,PLAA,SHTN1,USP9X,SEMA3A,PLXNA4,RYK,SEMA3G
GO:BP	ion transport	GO:0006811	0.00016251	3.78912	1572	642	86	21092	ATP1A2,ATP1A3,DLG4,PKD2,ABCC8,SPG11,KCNH2,SLC22A5,PKP2,HTT,GRIK3,CACNA1A,AKAP9,SLC25A3,GABRA4,RELN,SCN1A,TUSC3,DNM1L,KCND1,SLC4A4,SCN9A,KCNK9,FXYD6,NECTIN1,FHL1,NOS1AP,GNAI2,CACNB2,SLC35A1,CLCN2,CRBN,OPRM1,GPD1L,VDAC1,ANO10,CAMK2B,CAMK2G,PTK2B,STC1,DAPK1,SPTBN4,ANK3,RASGRF2,TRPC3,TRPC1,TRDN,ATP5F1E,SLC24A1,KLHL3,SERPINE2,CACNA2D2,KCNB1,KCNC1,HPCA,CACNA1B,KCNAB1,SEC14L1,CNNM1,AHNAK,SLC6A17,ATP5F1C…
GO:BP	cell migration	GO:0016477	0.0001643	3.78437	1498	642	83	21092	STAT5B,IRS2,INSR,ABCC8,NF2,BMPR2,BBS4,PAFAH1B1,ATM,LRP8,RELN,CDH2,DNM1L,MCC,VCAN,KRIT1,GNAI2,KIAA0319,MOSPD2,PIKFYVE,LRCH1,SMAD7,SEMA4A,DOCK4,NUMB,ATRN,CAMK2B,PTK2B,STC1,MARK2,NRCAM,ARID5B,SERPINE2,AAMP,DIXDC1,TUBB2A,ACKR4,APPL1,RERE,DGKZ,MAPRE2,NET1,TNR,SEMA3D,RUFY3,RIPOR2,ARHGAP24,SRGAP1,SIN3A,IGFBP5,KITLG,PLAA,SST,BCL11B,DIAPH1,ADAMTS9,ITGA5,VEGFB,NBL1,LHX1,MAPRE1,SH3RF1,SAP30L,SCRT2,FAT1,EOME…
GO:BP	positive regulation of cellular component organization	GO:0051130	0.00021632	3.66491	1050	642	64	21092	MAP2K1,DLG4,AHI1,INSR,ABCC8,NF2,BMPR2,HTT,BBS4,PAFAH1B1,ATM,LRP8,AKAP9,RELN,TOX,ADD1,DNM1L,DDX3X,CRBN,INO80,CUX2,SEMA4A,VDAC1,ARRB1,MAPK8,CAMK2B,CAMKK2,PTK2B,HNRNPK,MARK2,SYNJ1,DIXDC1,MFF,DDHD2,KATNB1,APPL1,MAPRE2,RAPGEF1,RUFY3,RIPOR2,COBL,AHNAK,KCTD17,SIN3A,STMP1,SUMO1,CCT3,RAD21,MAPRE1,TPPP3,PHIP,IRX3,SHTN1,INO80D,NLGN1,PLXNA4,HRK,NTRK3,BRAF,ITGA3,PFN1,UNC13B,MIB1,CKAP5
GO:BP	regulation of ion transmembrane transporter activity	GO:0032412	0.00022036	3.65686	258	642	26	21092	ATP1A2,DLG4,PKD2,ABCC8,HTT,AKAP9,RELN,FHL1,NOS1AP,CACNB2,CRBN,OPRM1,GPD1L,PTK2B,DAPK1,ANK3,RASGRF2,TRDN,KCNC1,HPCA,KCNAB1,AHNAK,SUMO1,WNK3,NLGN1,JPH1
GO:BP	regulation of nucleobase-containing compound metabolic process	GO:0019219	0.00027537	3.56008	4088	642	178	21092	BRCA1,STAT5B,ZNF41,LRPPRC,UTP4,MAP2K1,PKD2,AHI1,TARDBP,INSR,KCNH2,SOX2,BMPR2,DYRK1A,NSD1,ATM,MYO6,JAZF1,LRP8,USF1,RELN,TOX,DNM1L,KLF6,SLC4A4,SIX5,MBTPS2,CHD2,DDX3X,LPIN1,PRICKLE1,DICER1,AFF2,MED14,MSH3,TSFM,RAD52,INO80,ZFX,TEAD1,CUX2,EWSR1,SMAD7,MED13L,PABPC1,NUCKS1,ARRB1,ATAD2B,MAPK8,CREM,NFATC3,USF2,CAMKK2,DNMT3A,HSPA8,GPBP1,PTK2B,HNRNPK,NFX1,HSF2,APBB1,PFDN5,PSPC1,RARG,BRWD1,RBM39,ARID5B,NACA,…
GO:BP	regulation of system process	GO:0044057	0.00028115	3.55106	569	642	42	21092	ATP1A2,ATP1A3,DLG4,ABCC8,KCNH2,SLC22A5,PKP2,BMPR2,AKAP9,RELN,LPIN1,NOS1AP,GNAI2,CACNB2,DICER1,INHA,OPRM1,CUX2,SMAD7,GPD1L,DOCK4,CAMK2B,CAMK2G,PTK2B,STC1,SPTBN4,TRPC3,TRPC1,TRDN,STX1B,TNR,IGFBP5,ATP2B2,SUMO1,GRIN2B,IRX3,NLGN1,ATP1A1,KCNB2,UNC13B,TSHZ3,FTO
GO:BP	cation transmembrane transport	GO:0098655	0.0002815	3.55052	919	642	58	21092	ATP1A2,ATP1A3,DLG4,PKD2,ABCC8,KCNH2,SLC22A5,HTT,CACNA1A,AKAP9,SLC25A3,RELN,SCN1A,TUSC3,KCND1,SLC4A4,SCN9A,KCNK9,FHL1,NOS1AP,CACNB2,CRBN,OPRM1,GPD1L,VDAC1,ANO10,PTK2B,DAPK1,ANK3,RASGRF2,TRPC3,TRPC1,TRDN,SLC24A1,CACNA2D2,KCNB1,KCNC1,HPCA,CACNA1B,KCNAB1,AHNAK,SLC6A17,DIAPH1,ATP2B2,SUMO1,SLC17A7,GRIN2B,WNK3,NLGN1,NALF1,ATP1A1,CACNA1E,SCN3A,KCNB2,CACNA1I,RYR3,JPH1,PANX1
GO:BP	regulation of cation transmembrane transport	GO:1904062	0.00029785	3.526	371	642	32	21092	ATP1A2,DLG4,PKD2,ABCC8,KCNH2,HTT,AKAP9,RELN,FHL1,NOS1AP,CACNB2,CRBN,OPRM1,GPD1L,VDAC1,PTK2B,DAPK1,ANK3,RASGRF2,TRPC3,TRPC1,TRDN,KCNC1,HPCA,KCNAB1,AHNAK,DIAPH1,SUMO1,GRIN2B,WNK3,NLGN1,JPH1
GO:BP	regulation of cation channel activity	GO:2001257	0.00032233	3.49171	180	642	21	21092	DLG4,PKD2,ABCC8,HTT,RELN,NOS1AP,CACNB2,CRBN,OPRM1,PTK2B,DAPK1,ANK3,RASGRF2,TRDN,KCNC1,HPCA,KCNAB1,AHNAK,SUMO1,NLGN1,JPH1
GO:BP	regulation of axon extension	GO:0030516	0.00033104	3.48012	94	642	15	21092	BMPR2,PAFAH1B1,KIAA0319,SEMA4A,NRCAM,DPYSL2,TNR,SEMA3D,RUFY3,SIN3A,SHTN1,SEMA3A,PLXNA4,RYK,SEMA3G
GO:BP	multicellular organismal signaling	GO:0035637	0.00033915	3.46961	165	642	20	21092	ATP1A2,ATP1A3,KCNH2,PKP2,PAFAH1B1,AKAP9,SCN1A,SCN9A,CACNB2,NRCAM,SPTBN4,ANK3,TRPC1,TRDN,TNR,ATP2B2,IRX3,ATP1A1,SCN3A,CACNA1I
GO:BP	negative regulation of cell development	GO:0010721	0.00035442	3.45048	181	642	21	21092	ABCC8,NF2,KIFAP3,KIAA0319,DICER1,SEMA4A,NR1D1,DNAJB11,SOX11,TNR,SEMA3D,RUFY3,SYNGAP1,NPPC,GPR37L1,SEMA3A,NTRK3,RYK,DAB1,HES5,SEMA3G
GO:BP	growth	GO:0040007	0.00036279	3.44034	972	642	60	21092	STAT5B,INSR,SPG11,SOX2,BMPR2,BBS4,PAFAH1B1,ATM,ADD1,DDX3X,FHL1,SPTBN2,KIAA0319,INO80,TEAD1,SMAD7,SEMA4A,PLEKHA1,ATRN,PTK2B,ITSN2,DNAJB2,SORBS2,STC1,ALCAM,RARG,NRCAM,SPTBN4,DPYSL2,ARID5B,NACA,GAS1,SERPINE2,SLIT3,ATF2,RASAL2,NET1,TNR,SEMA3D,RUFY3,COBL,SIN3A,IGFBP5,POR,PLAA,GAP43,LHX1,NINJ2,NPPC,RERG,SHTN1,USP9X,SEMA3A,PLXNA4,RYK,FTO,RTF1,SEMA3G,MAP2K5,DCUN1D3
GO:BP	synapse organization	GO:0050808	0.00037814	3.42235	433	642	35	21092	DLG4,INSR,GPHN,SPG11,PAFAH1B1,LRP8,RELN,CDH2,SNCB,NECTIN1,NOS1AP,SPTBN2,CACNB2,CUX2,SEMA4A,CAMK2B,HSPA8,KIF1A,NRCAM,ANK3,BCAN,PCLO,TNR,LRFN5,CHD4,SYNGAP1,GAP43,GRIN2B,NLGN1,NTRK3,NFIA,ITGA3,RYK,PFN1,UNC13B
GO:BP	positive regulation of transport	GO:0051050	0.00043374	3.36277	908	642	57	21092	IRS2,PKD2,AHI1,TARDBP,INSR,ABCC8,KCNH2,PKP2,HTT,HPS4,AKAP9,RELN,CDH2,DNM1L,FHL1,NOS1AP,GNAI2,CACNB2,HUWE1,INHA,GPD1L,KCTD7,ARRB1,MAPK8,HNRNPK,APBB1,STC1,ANK3,SYNJ1,TRPC3,TRPC1,TRDN,MFF,SORBS1,KCNB1,KCNC1,STX1B,HPCA,MYH10,PGAP1,APPL1,RAPGEF1,SOX11,RUFY3,ABLIM3,PCSK1,PLAA,SUMO1,SYNGR3,LMAN2,WNK3,NLGN1,CACNA1I,BRAF,UNC13B,MIB1,CREBRF
GO:BP	regulation of transmembrane transporter activity	GO:0022898	0.00046829	3.32948	268	642	26	21092	ATP1A2,DLG4,PKD2,ABCC8,HTT,AKAP9,RELN,FHL1,NOS1AP,CACNB2,CRBN,OPRM1,GPD1L,PTK2B,DAPK1,ANK3,RASGRF2,TRDN,KCNC1,HPCA,KCNAB1,AHNAK,SUMO1,WNK3,NLGN1,JPH1
GO:BP	postsynapse organization	GO:0099173	0.00050352	3.29798	169	642	20	21092	DLG4,INSR,GPHN,PAFAH1B1,LRP8,RELN,CDH2,NOS1AP,SPTBN2,CUX2,CAMK2B,HSPA8,KIF1A,NRCAM,SYNGAP1,GAP43,GRIN2B,NLGN1,NTRK3,ITGA3
GO:BP	regulation of macromolecule biosynthetic process	GO:0010556	0.00050602	3.29583	3951	642	172	21092	BRCA1,STAT5B,IRS2,ZNF41,LRPPRC,UTP4,MAP2K1,PKD2,AHI1,TARDBP,FKTN,ELP1,INSR,KCNH2,SOX2,EIF2B4,BMPR2,DYRK1A,NSD1,ATM,MYO6,JAZF1,LRP8,USF1,RELN,TOX,KLF6,SIX5,MBTPS2,CHD2,DDX3X,LPIN1,PRICKLE1,DICER1,MED14,TSFM,INO80,ZFX,TEAD1,CUX2,EWSR1,SMAD7,MED13L,PABPC1,NUCKS1,ARRB1,ATAD2B,MAPK8,CREM,NFATC3,USF2,CAMKK2,DNMT3A,HSPA8,GPBP1,PTK2B,HNRNPK,NFX1,HSF2,APBB1,PFDN5,PSPC1,RARG,DAPK1,BRWD1,ARID5B,NACA,SALL3,S…
GO:BP	regulation of axonogenesis	GO:0050770	0.00057859	3.23763	155	642	19	21092	MAP2K1,BMPR2,PAFAH1B1,CDH2,KIAA0319,SEMA4A,MARK2,DIXDC1,TNR,SEMA3D,RUFY3,SYNGAP1,SHTN1,SEMA3A,PLXNA4,BRAF,RYK,DAB1,SEMA3G
GO:BP	developmental growth involved in morphogenesis	GO:0060560	0.00062257	3.20581	237	642	24	21092	SPG11,BMPR2,PAFAH1B1,KIAA0319,SEMA4A,ITSN2,ALCAM,RARG,NRCAM,DPYSL2,SLIT3,TNR,SEMA3D,RUFY3,COBL,SIN3A,PLAA,LHX1,SHTN1,USP9X,SEMA3A,PLXNA4,RYK,SEMA3G
GO:BP	calcium ion transport	GO:0006816	0.00117185	2.93113	434	642	34	21092	ATP1A2,PKD2,SPG11,HTT,CACNA1A,DNM1L,NOS1AP,GNAI2,CACNB2,OPRM1,VDAC1,CAMK2B,CAMK2G,PTK2B,STC1,TRPC3,TRPC1,TRDN,SLC24A1,CACNA2D2,HPCA,CACNA1B,AHNAK,DIAPH1,ATP2B2,SUMO1,GRIN2B,WNK3,NALF1,CACNA1E,CACNA1I,RYR3,JPH1,PANX1
GO:BP	regulation of RNA metabolic process	GO:0051252	0.00125496	2.90137	3775	642	164	21092	BRCA1,STAT5B,ZNF41,LRPPRC,UTP4,MAP2K1,PKD2,AHI1,TARDBP,INSR,KCNH2,SOX2,BMPR2,DYRK1A,NSD1,ATM,MYO6,JAZF1,LRP8,USF1,RELN,TOX,KLF6,SIX5,MBTPS2,CHD2,DDX3X,LPIN1,PRICKLE1,DICER1,AFF2,MED14,TSFM,INO80,ZFX,TEAD1,CUX2,EWSR1,SMAD7,MED13L,PABPC1,NUCKS1,ARRB1,ATAD2B,MAPK8,CREM,NFATC3,USF2,CAMKK2,DNMT3A,HSPA8,GPBP1,HNRNPK,NFX1,HSF2,APBB1,PFDN5,PSPC1,RARG,BRWD1,RBM39,ARID5B,NACA,SALL3,RBM5,SRCAP,DIS3L2,LARP7,…
GO:BP	cell growth	GO:0016049	0.00129446	2.88791	497	642	37	21092	SPG11,BMPR2,PAFAH1B1,DDX3X,FHL1,KIAA0319,INO80,TEAD1,SMAD7,SEMA4A,PTK2B,ITSN2,DNAJB2,SORBS2,ALCAM,RARG,NRCAM,DPYSL2,SERPINE2,SLIT3,NET1,TNR,SEMA3D,RUFY3,COBL,SIN3A,IGFBP5,PLAA,RERG,SHTN1,USP9X,SEMA3A,PLXNA4,RYK,SEMA3G,MAP2K5,DCUN1D3
GO:BP	inorganic cation transmembrane transport	GO:0098662	0.00160656	2.7941	807	642	51	21092	ATP1A2,ATP1A3,PKD2,ABCC8,KCNH2,HTT,CACNA1A,AKAP9,SLC25A3,SCN1A,TUSC3,KCND1,SLC4A4,SCN9A,KCNK9,FHL1,NOS1AP,CACNB2,CRBN,OPRM1,GPD1L,VDAC1,PTK2B,ANK3,TRPC3,TRPC1,TRDN,SLC24A1,CACNA2D2,KCNB1,KCNC1,HPCA,CACNA1B,KCNAB1,AHNAK,SLC6A17,DIAPH1,ATP2B2,SUMO1,SLC17A7,GRIN2B,WNK3,NALF1,ATP1A1,CACNA1E,SCN3A,KCNB2,CACNA1I,RYR3,JPH1,PANX1
GO:BP	regulation of multicellular organismal process	GO:0051239	0.00171269	2.76632	2753	642	127	21092	BRCA1,STAT5B,ATP1A2,ATP1A3,IRS2,MAP2K1,DLG4,AHI1,INSR,ABCC8,KCNH2,SLC22A5,PKP2,NF2,BMPR2,BBS4,PAFAH1B1,LRP8,USF1,AKAP9,RELN,TOX,ADD1,MCC,DDX3X,LPIN1,KIFAP3,KRIT1,PRICKLE1,NOS1AP,GNAI2,CACNB2,KIAA0319,DICER1,LTBP3,INHA,INO80,OPRM1,CUX2,SMAD7,GPD1L,SEMA4A,DOCK4,ARRB1,NUMB,RNF216,ATRN,CAMK2B,CAMK2G,PTK2B,AQP4,HNRNPK,STC1,RARG,SPTBN4,SYNJ1,TRPC3,TRPC1,TRDN,ANXA5,SERPINE2,AAMP,NR1D1,DIXDC1,DNAJB11,POG…
GO:BP	anterograde trans-synaptic signaling	GO:0098916	0.0018807	2.72568	721	642	47	21092	ATP1A2,KIF1B,DLG4,SPG11,PAFAH1B1,GRIK3,LRP8,CACNA1A,AKAP9,GABRA4,RELN,CDH2,SNCB,GNAI2,CACNB2,OPRM1,CUX2,VDAC1,CAMK2B,PTK2B,DNM1,PTPRN2,SYNJ1,RASGRF2,SLC24A1,PLCB4,SERPINE2,ADCY1,KCNB1,STX1B,CACNA1B,DGKZ,PCLO,TNR,SST,SYNGAP1,SNPH,SLC17A7,SYT11,INSYN2A,GRIN2B,NLGN1,CACNA1E,BRAF,GRM7,UNC13B,TSHZ3
GO:BP	chemical synaptic transmission	GO:0007268	0.0018807	2.72568	721	642	47	21092	ATP1A2,KIF1B,DLG4,SPG11,PAFAH1B1,GRIK3,LRP8,CACNA1A,AKAP9,GABRA4,RELN,CDH2,SNCB,GNAI2,CACNB2,OPRM1,CUX2,VDAC1,CAMK2B,PTK2B,DNM1,PTPRN2,SYNJ1,RASGRF2,SLC24A1,PLCB4,SERPINE2,ADCY1,KCNB1,STX1B,CACNA1B,DGKZ,PCLO,TNR,SST,SYNGAP1,SNPH,SLC17A7,SYT11,INSYN2A,GRIN2B,NLGN1,CACNA1E,BRAF,GRM7,UNC13B,TSHZ3
GO:BP	organelle organization	GO:0006996	0.00198285	2.70271	3545	642	155	21092	BRCA1,SMC1A,NDUFS4,MAP2K1,DLG4,PEX3,PKD2,AHI1,TARDBP,INSR,SPG11,RPGRIP1L,PKP2,GAN,NF2,DYRK1A,HTT,BBS4,HPS4,PAFAH1B1,ATM,MYO6,AKAP9,ZFYVE26,RELN,CDH2,ADD1,DNM1L,SEPTIN6,CHD2,DDX3X,LPIN1,TRIOBP,KIFAP3,NDUFAF5,NOS1AP,SPTBN2,HUWE1,AFF2,MSH3,INO80,PIKFYVE,ATG16L1,VIPAS39,SPTAN1,VDAC1,CCDC6,NEK1,ARRB1,SORT1,NUBPL,COG6,MAPK8,CAMKK2,PTK2B,SORBS2,DNM1,MARK2,ABLIM1,SPTBN4,ANK3,BRWD1,SYNJ1,DPYSL2,ABI1,STX5,…
GO:BP	negative regulation of cellular component organization	GO:0051129	0.00205626	2.68692	701	642	46	21092	BRCA1,DLG4,DYRK1A,BBS4,PAFAH1B1,ATM,ADD1,DDX3X,TRIOBP,SPTBN2,KIAA0319,HUWE1,CRBN,SEMA4A,SPTAN1,HSPA8,DNAJB2,PFDN5,SPTBN4,TUBB4A,SMG6,SVIL,STX1B,TBC1D4,KATNB1,TNR,SEMA3D,RUFY3,ARHGAP24,SYNGAP1,RAD21,MAPRE1,SYT11,GRIN2B,NLGN1,LRIG2,ZNF827,SEMA3A,TET1,ITGA3,RYK,PFN1,DAB1,FAT3,ADD3,SEMA3G
GO:BP	biosynthetic process	GO:0009058	0.00216593	2.66436	5941	642	236	21092	BRCA1,STAT5B,IRS2,GK,NDUFS4,ZNF41,LRPPRC,UTP4,MAP2K1,PC,PKD2,AHI1,TARDBP,FKTN,ELP1,DPYD,INSR,GPHN,KCNH2,SOX2,IMPDH1,EIF2B4,BMPR2,DYRK1A,NSD1,ATM,MYO6,ADCY9,JAZF1,LRP8,USF1,GBE1,RELN,TOX,TUSC3,PAPSS2,KLF6,RPS24,B3GALT2,SIX5,ALDH1L2,MBTPS2,ST3GAL5,CHD2,DDX3X,LPIN1,PPOX,PRICKLE1,NOS1AP,DARS2,DICER1,MED14,CLCN2,PGM1,TSFM,INHA,MTMR14,INO80,PIKFYVE,OPRM1,ZFX,TEAD1,PPIP5K1,ATG16L1,CUX2,EWSR1,SMAD7,MED13…
GO:BP	regulation of cell size	GO:0008361	0.00216941	2.66366	185	642	20	21092	BMPR2,PAFAH1B1,ADD1,RAP1GAP2,KIAA0319,SEMA4A,AQP4,RARG,NRCAM,DPYSL2,TNR,SEMA3D,RUFY3,SIN3A,SHTN1,WNK3,SEMA3A,PLXNA4,RYK,SEMA3G
GO:BP	organic substance biosynthetic process	GO:1901576	0.00229671	2.63889	5854	642	233	21092	BRCA1,STAT5B,IRS2,GK,NDUFS4,ZNF41,LRPPRC,UTP4,MAP2K1,PC,PKD2,AHI1,TARDBP,FKTN,ELP1,DPYD,INSR,GPHN,KCNH2,SOX2,IMPDH1,EIF2B4,BMPR2,DYRK1A,NSD1,ATM,MYO6,ADCY9,JAZF1,LRP8,USF1,GBE1,RELN,TOX,TUSC3,PAPSS2,KLF6,RPS24,B3GALT2,SIX5,MBTPS2,ST3GAL5,CHD2,DDX3X,LPIN1,PPOX,PRICKLE1,DARS2,DICER1,MED14,CLCN2,PGM1,TSFM,INHA,MTMR14,INO80,PIKFYVE,ZFX,TEAD1,PPIP5K1,ATG16L1,CUX2,EWSR1,SMAD7,MED13L,PABPC1,NUCKS1,ARRB1…
GO:BP	regulation of extent of cell growth	GO:0061387	0.00237356	2.6246	109	642	15	21092	BMPR2,PAFAH1B1,KIAA0319,SEMA4A,NRCAM,DPYSL2,TNR,SEMA3D,RUFY3,SIN3A,SHTN1,SEMA3A,PLXNA4,RYK,SEMA3G
GO:BP	trans-synaptic signaling	GO:0099537	0.00255698	2.59227	729	642	47	21092	ATP1A2,KIF1B,DLG4,SPG11,PAFAH1B1,GRIK3,LRP8,CACNA1A,AKAP9,GABRA4,RELN,CDH2,SNCB,GNAI2,CACNB2,OPRM1,CUX2,VDAC1,CAMK2B,PTK2B,DNM1,PTPRN2,SYNJ1,RASGRF2,SLC24A1,PLCB4,SERPINE2,ADCY1,KCNB1,STX1B,CACNA1B,DGKZ,PCLO,TNR,SST,SYNGAP1,SNPH,SLC17A7,SYT11,INSYN2A,GRIN2B,NLGN1,CACNA1E,BRAF,GRM7,UNC13B,TSHZ3
GO:BP	locomotion	GO:0040011	0.00262645	2.58063	1349	642	73	21092	ANOS1,ATP1A2,IRS2,MAP2K1,INSR,ABCC8,NF2,BMPR2,BBS4,ATM,RELN,DNM1L,MCC,KRIT1,NECTIN1,GNAI2,MOSPD2,PIKFYVE,LRCH1,SMAD7,SEMA4A,DOCK4,NUMB,CAMK2B,PTK2B,STC1,ALCAM,NRCAM,DPYSL2,SERPINE2,AAMP,SERPIND1,SLIT3,ACKR4,APPL1,MAPRE2,TNR,ARRDC3,SEMA3D,RUFY3,RIPOR2,SRGAP1,SIN3A,IGFBP5,KITLG,PLAA,SST,ECSCR,BCL11B,DIAPH1,ADAMTS9,GAP43,ITGA5,VEGFB,TMEFF1,NBL1,LHX1,SAP30L,SCRT2,SHTN1,LRIG2,UNC5C,SEMA3A,PLXNA4,TET1,…
GO:BP	neuron projection extension involved in neuron projection guidance	GO:1902284	0.00267381	2.57287	37	642	9	21092	BMPR2,SEMA4A,ALCAM,SLIT3,SEMA3D,SEMA3A,PLXNA4,RYK,SEMA3G
GO:BP	axon extension involved in axon guidance	GO:0048846	0.00267381	2.57287	37	642	9	21092	BMPR2,SEMA4A,ALCAM,SLIT3,SEMA3D,SEMA3A,PLXNA4,RYK,SEMA3G
GO:BP	synaptic signaling	GO:0099536	0.00270086	2.5685	753	642	48	21092	ATP1A2,KIF1B,DLG4,SPG11,PAFAH1B1,GRIK3,LRP8,CACNA1A,AKAP9,GABRA4,RELN,CDH2,SNCB,GNAI2,CACNB2,OPRM1,CUX2,VDAC1,GNAQ,CAMK2B,PTK2B,DNM1,PTPRN2,SYNJ1,RASGRF2,SLC24A1,PLCB4,SERPINE2,ADCY1,KCNB1,STX1B,CACNA1B,DGKZ,PCLO,TNR,SST,SYNGAP1,SNPH,SLC17A7,SYT11,INSYN2A,GRIN2B,NLGN1,CACNA1E,BRAF,GRM7,UNC13B,TSHZ3
GO:BP	action potential	GO:0001508	0.00376808	2.42388	143	642	17	21092	ATP1A2,KCNH2,PKP2,AKAP9,SCN1A,SCN9A,NOS1AP,CACNB2,GPD1L,GNAQ,NRCAM,ANK3,KCNB1,SUMO1,ATP1A1,SCN3A,CACNA1I
GO:BP	actin filament-based movement	GO:0030048	0.0038794	2.41124	128	642	16	21092	ATP1A2,KCNH2,PKP2,MYO6,AKAP9,SCN1A,MYO9B,NOS1AP,CACNB2,GPD1L,MYL6,STC1,MYH10,SUMO1,SHTN1,ATP1A1
GO:BP	organic cyclic compound biosynthetic process	GO:1901362	0.00392489	2.40617	4280	642	179	21092	BRCA1,STAT5B,NDUFS4,ZNF41,UTP4,MAP2K1,PKD2,AHI1,INSR,GPHN,KCNH2,SOX2,IMPDH1,BMPR2,DYRK1A,NSD1,ATM,MYO6,ADCY9,JAZF1,LRP8,USF1,RELN,TOX,PAPSS2,KLF6,SIX5,MBTPS2,CHD2,DDX3X,LPIN1,PPOX,PRICKLE1,DICER1,MED14,CLCN2,TSFM,INO80,ZFX,TEAD1,CUX2,EWSR1,SMAD7,MED13L,NUCKS1,ARRB1,POLR1C,TECR,ATAD2B,MAPK8,CREM,NFATC3,GART,USF2,CAMKK2,DNMT3A,HSPA8,GPBP1,PTK2B,HNRNPK,NFX1,HSF2,APBB1,PFDN5,PSPC1,RARG,BRWD1,ARID5B,N…
GO:BP	inorganic ion transmembrane transport	GO:0098660	0.00393083	2.40552	902	642	54	21092	ATP1A2,ATP1A3,PKD2,ABCC8,KCNH2,HTT,CACNA1A,AKAP9,SLC25A3,GABRA4,SCN1A,TUSC3,KCND1,SLC4A4,SCN9A,KCNK9,FHL1,NOS1AP,CACNB2,CLCN2,CRBN,OPRM1,GPD1L,VDAC1,ANO10,PTK2B,ANK3,TRPC3,TRPC1,TRDN,SLC24A1,CACNA2D2,KCNB1,KCNC1,HPCA,CACNA1B,KCNAB1,AHNAK,SLC6A17,DIAPH1,ATP2B2,SUMO1,SLC17A7,GRIN2B,WNK3,NALF1,ATP1A1,CACNA1E,SCN3A,KCNB2,CACNA1I,RYR3,JPH1,PANX1
GO:BP	synaptic transmission, glutamatergic	GO:0035249	0.0043784	2.35868	100	642	14	21092	ATP1A2,GRIK3,RELN,CDH2,PTK2B,SERPINE2,DGKZ,TNR,SLC17A7,GRIN2B,NLGN1,GRM7,UNC13B,TSHZ3
GO:BP	cellular nitrogen compound biosynthetic process	GO:0044271	0.00473249	2.32491	4853	642	198	21092	BRCA1,STAT5B,NDUFS4,ZNF41,LRPPRC,UTP4,MAP2K1,PKD2,AHI1,TARDBP,ELP1,INSR,KCNH2,SOX2,IMPDH1,EIF2B4,BMPR2,DYRK1A,NSD1,ATM,MYO6,ADCY9,JAZF1,LRP8,USF1,RELN,TOX,PAPSS2,KLF6,RPS24,B3GALT2,SIX5,MBTPS2,ST3GAL5,CHD2,DDX3X,LPIN1,PPOX,PRICKLE1,NOS1AP,DARS2,DICER1,MED14,TSFM,INO80,OPRM1,ZFX,TEAD1,CUX2,EWSR1,SMAD7,MED13L,PABPC1,NUCKS1,ARRB1,POLR1C,TECR,ATAD2B,MAPK8,CREM,NFATC3,GART,USF2,CAMKK2,DNMT3A,HSPA8,GPB…
GO:BP	behavior	GO:0007610	0.00546235	2.26262	637	642	42	21092	ATP1A2,DLG4,AHI1,INSR,ABCC8,SPG11,HTT,BBS4,PAFAH1B1,RELN,SCN1A,SCN9A,SPTBN2,AFF2,CRBN,OPRM1,CUX2,VDAC1,SPTBN4,SYNJ1,SERPINE2,NR1D1,DDHD2,ADCY5,ADCY1,PREX2,TNR,ARRDC3,SYNGAP1,ARCN1,ITGA5,SYT11,GRIN2B,STRN,NLGN1,BRAF,NPAS2,ITGA3,PDE1B,DAB1,NCOR1,USP2
GO:BP	rhythmic process	GO:0048511	0.00584813	2.23298	306	642	26	21092	STAT5B,TARDBP,DYRK1A,DNM1L,HUWE1,OPRM1,PLEKHA1,GNAQ,MAPK8,CREM,PSPC1,SLIT3,NR1D1,ADCY1,USP7,HLF,ENOX1,SIN3A,PRKDC,FBXL3,PHLPP1,USP9X,NLGN1,NPAS2,NCOR1,USP2
GO:BP	nucleotide metabolic process	GO:0009117	0.00643977	2.19113	597	642	40	21092	FHIT,ATP1A2,NDUFS4,PC,DPYD,INSR,IMPDH1,ADCY9,PAPSS2,DNM1L,SLC4A4,ALDH1L2,NT5C3A,PGM1,GPD1L,TECR,GART,HSPA8,PDE7A,ATP5F1E,ADCY5,ADCY1,NADK2,FAR1,HPCA,NT5C2,SLC25A16,OLA1,ATP5F1C,PDK3,GUCY1A2,ZBTB7A,PGAM1,NPPC,HSD17B4,NCOR1,SMUG1,FITM2,IDH2,ENTPD7
GO:BP	regulation of cell differentiation	GO:0045595	0.0064472	2.19063	1587	642	81	21092	STAT5B,MAP2K1,AHI1,ABCC8,PKP2,NF2,SOX2,BMPR2,PAFAH1B1,LRP8,RELN,TOX,ADD1,TRIOBP,KIFAP3,PRICKLE1,KIAA0319,DICER1,LTBP3,INHA,OPRM1,CUX2,SMAD7,SEMA4A,SORT1,NUMB,NFATC3,CAMK2B,PTK2B,RARG,NRCAM,SYNJ1,DPYSL2,NACA,SERPINE2,NR1D1,DIXDC1,DNAJB11,KLHL41,SOX11,TNR,GATAD2B,SEMA3D,RUFY3,RIPOR2,CHD4,SIN3A,IGFBP5,KITLG,P4HB,POR,PRKDC,SYNGAP1,PTBP3,BCL11B,ADAMTS9,SMARCC2,NBL1,LHX1,SH3RF1,NPPC,IRX3,SHTN1,GPR37L1,…
GO:BP	regulation of synaptic transmission, glutamatergic	GO:0051966	0.0064901	2.18775	76	642	12	21092	ATP1A2,GRIK3,RELN,CDH2,PTK2B,SERPINE2,DGKZ,TNR,GRIN2B,NLGN1,GRM7,TSHZ3
GO:BP	regulation of DNA-templated transcription	GO:0006355	0.00657119	2.18236	3474	642	150	21092	BRCA1,STAT5B,ZNF41,UTP4,MAP2K1,PKD2,AHI1,INSR,KCNH2,SOX2,BMPR2,DYRK1A,NSD1,ATM,MYO6,JAZF1,LRP8,USF1,RELN,TOX,KLF6,SIX5,MBTPS2,CHD2,DDX3X,LPIN1,PRICKLE1,DICER1,MED14,TSFM,INO80,ZFX,TEAD1,CUX2,EWSR1,SMAD7,MED13L,NUCKS1,ARRB1,ATAD2B,MAPK8,CREM,NFATC3,USF2,CAMKK2,DNMT3A,HSPA8,GPBP1,HNRNPK,NFX1,HSF2,APBB1,PFDN5,PSPC1,RARG,BRWD1,ARID5B,NACA,SALL3,SRCAP,LARP7,NR1D1,ZBTB18,ELP4,ADCY1,PPIE,WAC,USP7,HLF,RE…
GO:BP	regulation of nucleic acid-templated transcription	GO:1903506	0.00667969	2.17524	3475	642	150	21092	BRCA1,STAT5B,ZNF41,UTP4,MAP2K1,PKD2,AHI1,INSR,KCNH2,SOX2,BMPR2,DYRK1A,NSD1,ATM,MYO6,JAZF1,LRP8,USF1,RELN,TOX,KLF6,SIX5,MBTPS2,CHD2,DDX3X,LPIN1,PRICKLE1,DICER1,MED14,TSFM,INO80,ZFX,TEAD1,CUX2,EWSR1,SMAD7,MED13L,NUCKS1,ARRB1,ATAD2B,MAPK8,CREM,NFATC3,USF2,CAMKK2,DNMT3A,HSPA8,GPBP1,HNRNPK,NFX1,HSF2,APBB1,PFDN5,PSPC1,RARG,BRWD1,ARID5B,NACA,SALL3,SRCAP,LARP7,NR1D1,ZBTB18,ELP4,ADCY1,PPIE,WAC,USP7,HLF,RE…
GO:BP	negative regulation of gliogenesis	GO:0014014	0.00675411	2.17043	41	642	9	21092	ABCC8,NF2,DICER1,NR1D1,SOX11,GPR37L1,NTRK3,DAB1,HES5
GO:BP	cellular biosynthetic process	GO:0044249	0.00680577	2.16712	5782	642	228	21092	BRCA1,STAT5B,IRS2,GK,NDUFS4,ZNF41,LRPPRC,UTP4,MAP2K1,PKD2,AHI1,TARDBP,FKTN,ELP1,DPYD,INSR,GPHN,KCNH2,SOX2,IMPDH1,EIF2B4,BMPR2,DYRK1A,NSD1,ATM,MYO6,ADCY9,JAZF1,LRP8,USF1,GBE1,RELN,TOX,TUSC3,PAPSS2,KLF6,RPS24,B3GALT2,SIX5,MBTPS2,ST3GAL5,CHD2,DDX3X,LPIN1,PPOX,PRICKLE1,NOS1AP,DARS2,DICER1,MED14,CLCN2,TSFM,INHA,MTMR14,INO80,PIKFYVE,OPRM1,ZFX,TEAD1,ATG16L1,CUX2,EWSR1,SMAD7,MED13L,PABPC1,NUCKS1,ARRB1,PO…
GO:BP	organophosphate metabolic process	GO:0019637	0.00710333	2.14854	1040	642	59	21092	FHIT,PHEX,ATP1A2,GK,NDUFS4,PC,DPYD,INSR,GPHN,IMPDH1,PAFAH1B1,ATM,ADCY9,PAPSS2,DNM1L,SLC4A4,ALDH1L2,LPIN1,NT5C3A,MTMR8,PGM1,MTMR14,PIKFYVE,PPIP5K1,GPD1L,TECR,GART,HSPA8,PTK2B,PDE7A,SYNJ1,ATP5F1E,PIGN,ADCY5,ADCY1,NADK2,FAR1,HPCA,NT5C2,PGAP1,SLC25A16,DGKZ,OLA1,HADHA,ATP5F1C,PLAA,INPP4B,PDK3,GUCY1A2,ZBTB7A,PGAM1,NPPC,HSD17B4,NCOR1,SMUG1,FITM2,IDH2,ENTPD7,PLPPR1
GO:BP	organonitrogen compound metabolic process	GO:1901564	0.00715682	2.14528	6522	642	252	21092	BRCA1,ANOS1,STAT5B,FANCL,FHIT,PHEX,ATP1A2,NDUFS4,LRPPRC,MAP2K1,PC,DLG4,FBXO11,PKD2,TARDBP,FKTN,PCCA,ELP1,DPYD,INSR,GPHN,GAN,NF2,SOX2,IMPDH1,EIF2B4,BMPR2,DDB2,DYRK1A,HTT,PAFAH1B1,NSD1,ATM,ADCY9,LRP8,AKAP9,RELN,ADD1,PPP2R1B,SNCB,TUSC3,PAPSS2,DNM1L,ALDH6A1,RPS24,SLC4A4,B3GALT2,ALDH1L2,MBTPS2,ST3GAL5,DDX3X,TRIOBP,PPOX,PRICKLE1,NT5C3A,NDUFAF5,NOS1AP,GNAI2,DARS2,HLCS,SLC35A1,HUWE1,CRBN,PGM1,TSFM,INHA,H…
GO:BP	regulation of cellular component size	GO:0032535	0.00750419	2.1247	369	642	29	21092	BMPR2,BBS4,PAFAH1B1,ADD1,TRIOBP,RAP1GAP2,SPTBN2,KIAA0319,SEMA4A,SPTAN1,PTK2B,AQP4,RARG,NRCAM,SPTBN4,DPYSL2,SVIL,TNR,SEMA3D,RUFY3,SIN3A,SHTN1,WNK3,SEMA3A,PLXNA4,RYK,PFN1,ADD3,SEMA3G
GO:BP	cell motility	GO:0048870	0.00766529	2.11547	1698	642	85	21092	STAT5B,IRS2,MAP2K1,INSR,ABCC8,NF2,BMPR2,BBS4,PAFAH1B1,ATM,LRP8,RELN,CDH2,DNM1L,MCC,VCAN,KRIT1,GNAI2,KIAA0319,MOSPD2,PIKFYVE,LRCH1,SMAD7,SEMA4A,DOCK4,NUMB,ATRN,CAMK2B,PTK2B,STC1,MARK2,NRCAM,ARID5B,SERPINE2,AAMP,DIXDC1,TUBB2A,ACKR4,APPL1,RERE,DGKZ,MAPRE2,NET1,TNR,SEMA3D,RUFY3,RIPOR2,ARHGAP24,SRGAP1,SIN3A,IGFBP5,KITLG,PLAA,SST,BCL11B,DIAPH1,ADAMTS9,ITGA5,VEGFB,NBL1,LHX1,MAPRE1,SH3RF1,SAP30L,SCRT2,FA…
GO:BP	regulation of RNA biosynthetic process	GO:2001141	0.0077355	2.11151	3484	642	150	21092	BRCA1,STAT5B,ZNF41,UTP4,MAP2K1,PKD2,AHI1,INSR,KCNH2,SOX2,BMPR2,DYRK1A,NSD1,ATM,MYO6,JAZF1,LRP8,USF1,RELN,TOX,KLF6,SIX5,MBTPS2,CHD2,DDX3X,LPIN1,PRICKLE1,DICER1,MED14,TSFM,INO80,ZFX,TEAD1,CUX2,EWSR1,SMAD7,MED13L,NUCKS1,ARRB1,ATAD2B,MAPK8,CREM,NFATC3,USF2,CAMKK2,DNMT3A,HSPA8,GPBP1,HNRNPK,NFX1,HSF2,APBB1,PFDN5,PSPC1,RARG,BRWD1,ARID5B,NACA,SALL3,SRCAP,LARP7,NR1D1,ZBTB18,ELP4,ADCY1,PPIE,WAC,USP7,HLF,RE…
GO:BP	macromolecule biosynthetic process	GO:0009059	0.00805657	2.09385	4801	642	195	21092	BRCA1,STAT5B,IRS2,ZNF41,LRPPRC,UTP4,MAP2K1,PKD2,AHI1,TARDBP,FKTN,ELP1,INSR,KCNH2,SOX2,EIF2B4,BMPR2,DYRK1A,NSD1,ATM,MYO6,JAZF1,LRP8,USF1,GBE1,RELN,TOX,TUSC3,KLF6,RPS24,B3GALT2,SIX5,MBTPS2,ST3GAL5,CHD2,DDX3X,LPIN1,PRICKLE1,DARS2,DICER1,MED14,TSFM,INHA,INO80,ZFX,TEAD1,ATG16L1,CUX2,EWSR1,SMAD7,MED13L,PABPC1,NUCKS1,ARRB1,POLR1C,ATAD2B,MAPK8,CREM,NFATC3,USF2,CAMKK2,DNMT3A,HSPA8,GPBP1,PTK2B,HNRNPK,NFX1,…
GO:BP	regulation of NMDA receptor activity	GO:2000310	0.00816169	2.08822	23	642	7	21092	DLG4,RELN,OPRM1,PTK2B,DAPK1,RASGRF2,NLGN1
GO:BP	ion transmembrane transport	GO:0034220	0.00830683	2.08056	1143	642	63	21092	ATP1A2,ATP1A3,DLG4,PKD2,ABCC8,KCNH2,SLC22A5,HTT,GRIK3,CACNA1A,AKAP9,SLC25A3,GABRA4,RELN,SCN1A,TUSC3,KCND1,SLC4A4,SCN9A,KCNK9,FHL1,NOS1AP,CACNB2,SLC35A1,CLCN2,CRBN,OPRM1,GPD1L,VDAC1,ANO10,PTK2B,DAPK1,ANK3,RASGRF2,TRPC3,TRPC1,TRDN,SLC24A1,CACNA2D2,KCNB1,KCNC1,HPCA,CACNA1B,KCNAB1,AHNAK,SLC6A17,DIAPH1,ATP2B2,SUMO1,SLC17A7,GRIN2B,WNK3,NLGN1,NALF1,ATP1A1,CACNA1E,LRRC8C,SCN3A,KCNB2,CACNA1I,RYR3,JPH1,PAN…
GO:BP	cellular localization	GO:0051641	0.00908407	2.04172	3580	642	153	21092	ATP1A2,KIF1B,IRS2,LRPPRC,MAP2K1,DLG4,PEX3,PKD2,AHI1,TARDBP,ABCC8,GPHN,SPG11,PKP2,NF2,HTT,BBS4,HGSNAT,HPS4,PAFAH1B1,ATM,MYO6,AKAP9,RELN,SCN1A,CDH2,SNCB,DNM1L,MCC,SEPTIN6,DDX3X,KIFAP3,PRICKLE1,NECTIN1,CACNB2,HUWE1,KIFBP,PIKFYVE,OPRM1,ATG16L1,NUP214,GPD1L,VIPAS39,PLEKHA1,ARRB1,SORT1,COG6,MAPK8,NUMB,CABP1,CAMK2G,HSPA8,PTK2B,ITSN2,DNAJB2,APBB1,KIF1A,DNM1,NRCAM,SPTBN4,ANK3,PTPRN2,SYNJ1,STX5,NACA,MIA2,T…
GO:BP	aromatic compound biosynthetic process	GO:0019438	0.00939498	2.0271	4133	642	172	21092	BRCA1,STAT5B,NDUFS4,ZNF41,UTP4,MAP2K1,PKD2,AHI1,INSR,KCNH2,SOX2,IMPDH1,BMPR2,DYRK1A,NSD1,ATM,MYO6,ADCY9,JAZF1,LRP8,USF1,RELN,TOX,PAPSS2,KLF6,SIX5,MBTPS2,CHD2,DDX3X,LPIN1,PPOX,PRICKLE1,DICER1,MED14,TSFM,INO80,ZFX,TEAD1,CUX2,EWSR1,SMAD7,MED13L,NUCKS1,ARRB1,POLR1C,TECR,ATAD2B,MAPK8,CREM,NFATC3,GART,USF2,CAMKK2,DNMT3A,HSPA8,GPBP1,PTK2B,HNRNPK,NFX1,HSF2,APBB1,PFDN5,PSPC1,RARG,BRWD1,ARID5B,NACA,SALL3,T…
GO:BP	nucleoside phosphate metabolic process	GO:0006753	0.00961697	2.01696	607	642	40	21092	FHIT,ATP1A2,NDUFS4,PC,DPYD,INSR,IMPDH1,ADCY9,PAPSS2,DNM1L,SLC4A4,ALDH1L2,NT5C3A,PGM1,GPD1L,TECR,GART,HSPA8,PDE7A,ATP5F1E,ADCY5,ADCY1,NADK2,FAR1,HPCA,NT5C2,SLC25A16,OLA1,ATP5F1C,PDK3,GUCY1A2,ZBTB7A,PGAM1,NPPC,HSD17B4,NCOR1,SMUG1,FITM2,IDH2,ENTPD7
GO:BP	tissue development	GO:0009888	0.0098495	2.00659	1973	642	95	21092	STAT5B,PHEX,MAP2K1,PKD2,AHI1,INSR,SPG11,SGCZ,RPGRIP1L,PKP2,NF2,SOX2,BMPR2,BBS4,PAFAH1B1,ATM,MYO6,CDH2,TOX,ADD1,TRIOBP,KRIT1,PRICKLE1,NECTIN1,CLCN2,LTBP3,SMAD7,SEMA4A,VDAC1,TST,MYL6,ATRN,PTK2B,SORBS2,STC1,RARG,ABI1,ARID5B,NACA,PRICKLE2,KLHL3,SERPINE2,ZBTB18,SVIL,POGLUT1,KLHL41,HLF,ATF2,RASAL2,RAPGEF1,SOX11,ARRDC3,SEMA3D,RIPOR2,ARHGAP24,MICAL2,COBL,MGMT,IGFBP5,KITLG,POR,BTBD7,SSBP3,PRKDC,BCL11B,ADA…
GO:BP	nucleobase-containing compound biosynthetic process	GO:0034654	0.00991965	2.0035	4049	642	169	21092	BRCA1,STAT5B,NDUFS4,ZNF41,UTP4,MAP2K1,PKD2,AHI1,INSR,KCNH2,SOX2,IMPDH1,BMPR2,DYRK1A,NSD1,ATM,MYO6,ADCY9,JAZF1,LRP8,USF1,RELN,TOX,PAPSS2,KLF6,SIX5,MBTPS2,CHD2,DDX3X,LPIN1,PRICKLE1,DICER1,MED14,TSFM,INO80,ZFX,TEAD1,CUX2,EWSR1,SMAD7,MED13L,NUCKS1,ARRB1,POLR1C,TECR,ATAD2B,MAPK8,CREM,NFATC3,GART,USF2,CAMKK2,DNMT3A,HSPA8,GPBP1,PTK2B,HNRNPK,NFX1,HSF2,APBB1,PFDN5,PSPC1,RARG,BRWD1,ARID5B,NACA,SALL3,ATP5F1…
GO:BP	regulation of transcription by RNA polymerase II	GO:0006357	0.0105939	1.97494	2574	642	117	21092	BRCA1,STAT5B,ZNF41,PKD2,AHI1,SOX2,BMPR2,NSD1,ATM,MYO6,JAZF1,USF1,TOX,KLF6,SIX5,MBTPS2,CHD2,DDX3X,LPIN1,DICER1,MED14,INO80,ZFX,TEAD1,CUX2,SMAD7,MED13L,NUCKS1,ARRB1,ATAD2B,CREM,NFATC3,USF2,DNMT3A,GPBP1,HNRNPK,NFX1,HSF2,APBB1,RARG,BRWD1,ARID5B,NACA,SALL3,SRCAP,LARP7,NR1D1,ZBTB18,ELP4,HLF,ATF2,PPRC1,ZNF582,CHD6,SOX11,GATAD2B,ABLIM3,CHD4,SIN3A,SSBP3,PRKDC,ZNF605,MXD1,BCL11B,ZBTB7A,SMARCC2,LHX1,RAD21,P…
GO:BP	calcium ion transmembrane transport	GO:0070588	0.0120249	1.91992	338	642	27	21092	ATP1A2,PKD2,HTT,CACNA1A,NOS1AP,CACNB2,OPRM1,VDAC1,PTK2B,TRPC3,TRPC1,TRDN,SLC24A1,CACNA2D2,HPCA,CACNA1B,AHNAK,DIAPH1,ATP2B2,SUMO1,GRIN2B,NALF1,CACNA1E,CACNA1I,RYR3,JPH1,PANX1
GO:BP	heterocycle biosynthetic process	GO:0018130	0.0123221	1.90932	4122	642	171	21092	BRCA1,STAT5B,NDUFS4,ZNF41,UTP4,MAP2K1,PKD2,AHI1,INSR,GPHN,KCNH2,SOX2,IMPDH1,BMPR2,DYRK1A,NSD1,ATM,MYO6,ADCY9,JAZF1,LRP8,USF1,RELN,TOX,PAPSS2,KLF6,SIX5,MBTPS2,CHD2,DDX3X,LPIN1,PPOX,PRICKLE1,DICER1,MED14,TSFM,INO80,ZFX,TEAD1,CUX2,EWSR1,SMAD7,MED13L,NUCKS1,ARRB1,POLR1C,TECR,ATAD2B,MAPK8,CREM,NFATC3,GART,USF2,CAMKK2,DNMT3A,HSPA8,GPBP1,PTK2B,HNRNPK,NFX1,HSF2,APBB1,PFDN5,PSPC1,RARG,BRWD1,ARID5B,NACA,SA…
GO:BP	cellular catabolic process	GO:0044248	0.0131077	1.88247	2121	642	100	21092	HADHB,FHIT,IRS2,GK,LRPPRC,FBXO11,TARDBP,PCCA,DPYD,INSR,SPG11,HTT,ATM,ZFYVE26,DNM1L,ALDH6A1,SLC4A4,ALDH1L2,LPIN1,PRICKLE1,NT5C3A,HUWE1,DICER1,MTMR8,CRBN,HIBCH,MTMR14,PIKFYVE,ATG16L1,SMAD7,TTC37,PABPC1,VDAC1,TST,ARRB1,MAPK8,RNF216,CAMKK2,HSPA8,PTK2B,DNAJB2,PDE7A,MARK2,DAPK1,KLHL3,DIS3L2,USP20,DDHD2,SMG6,LIPE,NT5C2,TECPR2,WAC,USP7,PPP2R5C,FBXL5,SNX14,USP48,NEMF,ATG2B,SND1,KCTD17,FAH,FUCA1,HADHA,POR,…
GO:BP	regulation of developmental growth	GO:0048638	0.0131936	1.87964	320	642	26	21092	STAT5B,INSR,BMPR2,BBS4,PAFAH1B1,KIAA0319,SMAD7,SEMA4A,ATRN,ITSN2,NRCAM,SPTBN4,DPYSL2,NACA,TNR,SEMA3D,RUFY3,SIN3A,PLAA,NPPC,SHTN1,SEMA3A,PLXNA4,RYK,FTO,SEMA3G
GO:BP	positive regulation of cellular metabolic process	GO:0031325	0.0141762	1.84844	3094	642	135	21092	BRCA1,STAT5B,IRS2,MAP2K1,DLG4,PKD2,AHI1,TARDBP,INSR,KCNH2,SOX2,BMPR2,DYRK1A,HTT,NSD1,ATM,MYO6,LRP8,USF1,AKAP9,RELN,TOX,KLF6,SLC4A4,SIX5,MBTPS2,DDX3X,LPIN1,PRICKLE1,NOS1AP,GNAI2,MED14,INHA,INO80,OPRM1,ZFX,TEAD1,ATG16L1,SMAD7,PABPC1,NUCKS1,VDAC1,ARRB1,ATAD2B,CREM,NFATC3,USF2,CAMKK2,HSPA8,GPBP1,PTK2B,DNAJB2,HNRNPK,HSF2,APBB1,MARK2,RARG,DAPK1,FZD8,ABI1,ARID5B,NACA,SRCAP,DIS3L2,LARP7,U2AF2,MAP4K2,NR1D…
GO:BP	regulation of cell migration	GO:0030334	0.0163126	1.78748	923	642	53	21092	IRS2,INSR,ABCC8,NF2,BMPR2,ATM,RELN,DNM1L,MCC,KRIT1,GNAI2,MOSPD2,LRCH1,SMAD7,SEMA4A,DOCK4,NUMB,CAMK2B,PTK2B,STC1,SERPINE2,AAMP,APPL1,MAPRE2,TNR,SEMA3D,RUFY3,RIPOR2,SRGAP1,SIN3A,IGFBP5,KITLG,PLAA,SST,DIAPH1,ADAMTS9,ITGA5,VEGFB,NBL1,SAP30L,SCRT2,SHTN1,LRIG2,UNC5C,SEMA3A,PLXNA4,TET1,NTRK3,BRAF,ITGA3,PFN1,SEMA3G,MAP2K5
GO:BP	negative regulation of protein polymerization	GO:0032272	0.0166914	1.77751	83	642	12	21092	DYRK1A,BBS4,ADD1,TRIOBP,SPTBN2,SPTAN1,SPTBN4,TUBB4A,SVIL,MAPRE1,PFN1,ADD3
GO:BP	membrane depolarization during action potential	GO:0086010	0.017438	1.7585	35	642	8	21092	ATP1A2,KCNH2,SCN1A,SCN9A,CACNB2,ANK3,SCN3A,CACNA1I
GO:BP	mitotic cell cycle	GO:0000278	0.0184211	1.73468	927	642	53	21092	BRCA1,SMC1A,STAT5B,PKD2,INSR,HTT,BBS4,PAFAH1B1,ATM,ZFYVE26,SEPTIN6,DDX3X,LPIN1,FHL1,INO80,NUP214,NEK11,DNMT3A,ANK3,DIS3L2,GAS1,TUBB4A,TUBGCP4,TUBB2A,MYH10,WAC,KATNB1,APPL1,ATF2,PPP2R5C,DGKZ,RIPOR2,SIN3A,PRKDC,SMARCC2,MCM6,RAD21,EXOC5,PKIA,FBXL3,MAPRE1,PPME1,PHIP,RINT1,REEP3,FZD3,CKS1B,CLTC,CKAP5,SMARCB1,DCUN1D3,E2F6,USP2
GO:BP	regulation of cell growth	GO:0001558	0.0193094	1.71423	429	642	31	21092	BMPR2,PAFAH1B1,DDX3X,FHL1,KIAA0319,INO80,TEAD1,SMAD7,SEMA4A,PTK2B,ITSN2,DNAJB2,NRCAM,DPYSL2,SERPINE2,SLIT3,NET1,TNR,SEMA3D,RUFY3,SIN3A,IGFBP5,PLAA,RERG,SHTN1,SEMA3A,PLXNA4,RYK,SEMA3G,MAP2K5,DCUN1D3
GO:BP	positive regulation of cell projection organization	GO:0031346	0.0194634	1.71078	347	642	27	21092	MAP2K1,DLG4,BMPR2,HTT,BBS4,PAFAH1B1,LRP8,RELN,TOX,CUX2,CAMK2B,PTK2B,MARK2,DIXDC1,KATNB1,RAPGEF1,RUFY3,RIPOR2,COBL,KCTD17,SHTN1,NLGN1,PLXNA4,NTRK3,BRAF,ITGA3,PFN1
GO:BP	cardiac muscle cell contraction	GO:0086003	0.0202118	1.6944	71	642	11	21092	ATP1A2,KCNH2,PKP2,AKAP9,SCN1A,NOS1AP,CACNB2,GPD1L,STC1,SUMO1,ATP1A1
GO:BP	actin-mediated cell contraction	GO:0070252	0.0207682	1.6826	99	642	13	21092	ATP1A2,KCNH2,PKP2,AKAP9,SCN1A,NOS1AP,CACNB2,GPD1L,MYL6,STC1,SUMO1,SHTN1,ATP1A1
GO:BP	heart process	GO:0003015	0.0221121	1.65537	252	642	22	21092	ATP1A2,ATP1A3,SGCZ,KCNH2,PKP2,AKAP9,SCN1A,DNM1L,NOS1AP,GNAI2,CACNB2,SMAD7,GPD1L,STC1,SPTBN4,TRPC1,TRDN,ATP2B2,SUMO1,VEGFB,IRX3,ATP1A1
GO:BP	signaling	GO:0023052	0.0228906	1.64034	6492	642	248	21092	BRCA1,STAT5B,FHIT,PHEX,ATP1A2,ATP1A3,KIF1B,IRS2,MAP2K1,DLG4,PKD2,AHI1,FKTN,INSR,ABCC8,SPG11,KCNH2,RPGRIP1L,PKP2,NF2,SOX2,EIF2B4,BMPR2,DYRK1A,HTT,BBS4,PAFAH1B1,ATM,MYO6,ADCY9,GRIK3,LRP8,CACNA1A,AKAP9,PCDH11Y,GABRA4,LIFR,RELN,SCN1A,CDH2,PPP2R1B,SNCB,DNM1L,MCC,MBTPS2,SCN9A,DDX3X,KIFAP3,KRIT1,PRICKLE1,RAP1GAP2,MYO9B,NOS1AP,GNAI2,CACNB2,KIAA0319,DICER1,LTBP3,GPR34,ARHGEF9,INHA,MYH7B,ARHGEF28,PIKFYVE,O…
GO:BP	regulation of cellular localization	GO:0060341	0.0232754	1.6331	959	642	54	21092	IRS2,MAP2K1,DLG4,TARDBP,ABCC8,NF2,HPS4,CDH2,DNM1L,HUWE1,OPRM1,NUP214,GPD1L,MAPK8,NUMB,CABP1,HSPA8,DNAJB2,APBB1,ANK3,NACA,TRPC3,GAS1,LARP7,NR1D1,MFF,ADCY5,NUP58,SORBS1,KCNB1,HPCA,MYH10,PGAP1,USP7,APPL1,RUFY3,ABLIM3,RIPOR2,SIN3A,PCSK1,SUMO1,CCT3,PKIA,AAK1,RINT1,SYT11,WNK3,LRIG2,DISP1,ITGA3,UNC13B,CLTC,DNAJC13,CREBRF
GO:BP	potassium ion transmembrane transport	GO:0071805	0.0234088	1.63062	216	642	20	21092	ATP1A2,ATP1A3,PKD2,ABCC8,KCNH2,AKAP9,KCND1,KCNK9,FHL1,NOS1AP,CRBN,ANK3,SLC24A1,KCNB1,KCNC1,KCNAB1,SUMO1,WNK3,ATP1A1,KCNB2
GO:BP	transcription by RNA polymerase II	GO:0006366	0.0243188	1.61406	2676	642	119	21092	BRCA1,STAT5B,ZNF41,PKD2,AHI1,SOX2,BMPR2,NSD1,ATM,MYO6,JAZF1,USF1,TOX,KLF6,SIX5,MBTPS2,CHD2,DDX3X,LPIN1,DICER1,MED14,INO80,ZFX,TEAD1,CUX2,SMAD7,MED13L,NUCKS1,ARRB1,ATAD2B,CREM,NFATC3,USF2,DNMT3A,GPBP1,HNRNPK,NFX1,HSF2,APBB1,RARG,BRWD1,ARID5B,NACA,SALL3,SRCAP,LARP7,NR1D1,ZBTB18,ELP4,HLF,ATF2,PPRC1,ZNF582,CHD6,SOX11,GATAD2B,ABLIM3,CHD4,SIN3A,SSBP3,PRKDC,ZNF605,MXD1,BCL11B,ZBTB7A,SMARCC2,INTS2,LHX1,R…
GO:BP	positive regulation of developmental process	GO:0051094	0.0260492	1.5842	1337	642	69	21092	BRCA1,STAT5B,MAP2K1,DLG4,AHI1,INSR,NF2,SOX2,BMPR2,BBS4,PAFAH1B1,LRP8,RELN,TOX,ADD1,DNM1L,TRIOBP,DICER1,LTBP3,OPRM1,CUX2,SMAD7,SEMA4A,NUMB,CAMK2B,PTK2B,ITSN2,NRCAM,SPTBN4,SYNJ1,NACA,SERPINE2,DIXDC1,MFF,DDHD2,SOX11,RUFY3,RIPOR2,COBL,SIN3A,KITLG,P4HB,POR,SSBP3,PLAA,PRKDC,ADAMTS9,SMARCC2,ITGA5,VEGFB,NBL1,LHX1,NPPC,SAP30L,IRX3,SHTN1,NLGN1,UNC5C,PLXNA4,MTDH,TET1,ADAM12,FZD3,BRAF,LMO3,OVOL2,DAB1,SMARCB1…
GO:BP	forebrain development	GO:0030900	0.0264978	1.57679	394	642	29	21092	ATP1A2,ATP1A3,RPGRIP1L,NF2,SOX2,BBS4,PAFAH1B1,LRP8,RELN,CDH2,TOX,NUMB,GART,BCAN,DIXDC1,NDST1,KCNC1,PGAP1,TNR,SIN3A,PCSK1,BCL11B,LHX1,EOMES,SEMA3A,PLXNA4,RYK,DAB1,HES5
GO:BP	DNA-templated transcription	GO:0006351	0.0279911	1.55298	3595	642	151	21092	BRCA1,STAT5B,ZNF41,UTP4,MAP2K1,PKD2,AHI1,INSR,KCNH2,SOX2,BMPR2,DYRK1A,NSD1,ATM,MYO6,JAZF1,LRP8,USF1,RELN,TOX,KLF6,SIX5,MBTPS2,CHD2,DDX3X,LPIN1,PRICKLE1,DICER1,MED14,TSFM,INO80,ZFX,TEAD1,CUX2,EWSR1,SMAD7,MED13L,NUCKS1,ARRB1,POLR1C,ATAD2B,MAPK8,CREM,NFATC3,USF2,CAMKK2,DNMT3A,HSPA8,GPBP1,HNRNPK,NFX1,HSF2,APBB1,PFDN5,PSPC1,RARG,BRWD1,ARID5B,NACA,SALL3,SRCAP,LARP7,NR1D1,ZBTB18,ELP4,ADCY1,PPIE,WAC,USP7…
GO:BP	vesicle-mediated transport	GO:0016192	0.0280895	1.55146	1625	642	80	21092	KIF1B,PRG4,MAP2K1,DLG4,AHI1,INSR,SPG11,HTT,HPS4,MYO6,LRP8,CDH2,SNCB,DNM1L,GNAI2,SPTBN2,CACNB2,PIKFYVE,PRSS12,VIPAS39,ARRB1,SORT1,COG6,NUMB,HSPA8,ITSN2,HNRNPK,KIF1A,DNM1,SPTBN4,ANK3,SYNJ1,DPYSL2,STX5,MIA2,AP4E1,GAS1,MBTPS1,MAP4K2,USP20,VPS45,ADCY1,KCNB1,STX1B,HPCA,ACKR4,TBC1D4,PGAP1,USP7,APPL1,PCLO,RAPGEF1,CSNK1G1,C12ORF4,PLAA,ADAMTS9,ARCN1,SYNGR3,ACTR1A,BET1,EXOC5,LMAN2,SNPH,AAK1,RAB10,SLC17A7,RI…
GO:BP	nucleic acid-templated transcription	GO:0097659	0.0284154	1.54645	3596	642	151	21092	BRCA1,STAT5B,ZNF41,UTP4,MAP2K1,PKD2,AHI1,INSR,KCNH2,SOX2,BMPR2,DYRK1A,NSD1,ATM,MYO6,JAZF1,LRP8,USF1,RELN,TOX,KLF6,SIX5,MBTPS2,CHD2,DDX3X,LPIN1,PRICKLE1,DICER1,MED14,TSFM,INO80,ZFX,TEAD1,CUX2,EWSR1,SMAD7,MED13L,NUCKS1,ARRB1,POLR1C,ATAD2B,MAPK8,CREM,NFATC3,USF2,CAMKK2,DNMT3A,HSPA8,GPBP1,HNRNPK,NFX1,HSF2,APBB1,PFDN5,PSPC1,RARG,BRWD1,ARID5B,NACA,SALL3,SRCAP,LARP7,NR1D1,ZBTB18,ELP4,ADCY1,PPIE,WAC,USP7…
GO:BP	cognition	GO:0050890	0.0313281	1.50407	316	642	25	21092	ATP1A2,DLG4,INSR,ABCC8,SPG11,HTT,BBS4,PAFAH1B1,RELN,TUSC3,AFF2,CUX2,VDAC1,SYNJ1,DDHD2,ADCY1,TNR,SYNGAP1,ITGA5,SYT11,GRIN2B,DOP1B,BRAF,ITGA3,PDE1B
GO:BP	axon guidance	GO:0007411	0.0317208	1.49866	239	642	21	21092	ANOS1,BMPR2,RELN,NECTIN1,SEMA4A,ALCAM,NRCAM,DPYSL2,SLIT3,TNR,SEMA3D,BCL11B,GAP43,TMEFF1,LHX1,UNC5C,SEMA3A,PLXNA4,FZD3,RYK,SEMA3G
GO:BP	neuron projection guidance	GO:0097485	0.0337922	1.47118	240	642	21	21092	ANOS1,BMPR2,RELN,NECTIN1,SEMA4A,ALCAM,NRCAM,DPYSL2,SLIT3,TNR,SEMA3D,BCL11B,GAP43,TMEFF1,LHX1,UNC5C,SEMA3A,PLXNA4,FZD3,RYK,SEMA3G
GO:BP	catabolic process	GO:0009056	0.0359619	1.44416	2587	642	115	21092	HADHB,FHIT,IRS2,GK,LRPPRC,FBXO11,TARDBP,PCCA,DPYD,INSR,SPG11,HTT,PAFAH1B1,ATM,ZFYVE26,DNM1L,ALDH6A1,SLC4A4,ALDH1L2,LPIN1,PRICKLE1,NT5C3A,HUWE1,DICER1,MTMR8,CRBN,PGM1,HIBCH,MTMR14,PIKFYVE,ATG16L1,ADAMTS2,SMAD7,GPD1L,TTC37,PABPC1,VDAC1,TST,ARRB1,MAPK8,RNF216,CAMKK2,HSPA8,PTK2B,DNAJB2,PDE7A,MARK2,DAPK1,SYNJ1,STX5,KLHL3,DIS3L2,PLCB4,SERPINE2,NR1D1,USP20,DDHD2,SMG6,LIPE,NT5C2,TECPR2,WAC,USP7,PPP2R5C,F…
GO:BP	potassium ion transport	GO:0006813	0.0359846	1.44388	241	642	21	21092	ATP1A2,ATP1A3,PKD2,ABCC8,KCNH2,AKAP9,KCND1,KCNK9,FHL1,NOS1AP,CRBN,PTK2B,ANK3,SLC24A1,KCNB1,KCNC1,KCNAB1,SUMO1,WNK3,ATP1A1,KCNB2
GO:BP	dendrite development	GO:0016358	0.0359846	1.44388	241	642	21	21092	DLG4,BBS4,PAFAH1B1,LRP8,RELN,KIAA0319,CUX2,CAMK2B,KIF1A,ABI1,PREX2,RERE,RTN4IP1,COBL,SYNGAP1,TMEFF1,STRN,NLGN1,SEMA3A,DAB1,FAT3
GO:BP	heart contraction	GO:0060047	0.0359846	1.44388	241	642	21	21092	ATP1A2,ATP1A3,SGCZ,KCNH2,PKP2,AKAP9,SCN1A,DNM1L,NOS1AP,CACNB2,SMAD7,GPD1L,STC1,SPTBN4,TRPC1,TRDN,ATP2B2,SUMO1,VEGFB,IRX3,ATP1A1
GO:BP	cell-cell signaling	GO:0007267	0.0362211	1.44104	1663	642	81	21092	PHEX,ATP1A2,KIF1B,IRS2,DLG4,PKD2,ABCC8,SPG11,PKP2,SOX2,PAFAH1B1,GRIK3,LRP8,CACNA1A,AKAP9,PCDH11Y,GABRA4,RELN,CDH2,SNCB,MCC,DDX3X,PRICKLE1,GNAI2,CACNB2,LTBP3,INHA,OPRM1,CUX2,VDAC1,GNAQ,CAMK2B,CAMK2G,PTK2B,PFDN5,DNM1,MARK2,RARG,PTPRN2,FZD8,SYNJ1,RASGRF2,PRICKLE2,SLC24A1,PLCB4,SERPINE2,NR1D1,DIXDC1,ADCY5,ADCY1,KCNB1,STX1B,CACNA1B,DGKZ,PCLO,RAPGEF1,SOX11,TNR,CSNK1G1,PCSK1,SST,SYNGAP1,LHX1,SNPH,SLC17A…
GO:BP	RNA biosynthetic process	GO:0032774	0.0377207	1.42342	3615	642	151	21092	BRCA1,STAT5B,ZNF41,UTP4,MAP2K1,PKD2,AHI1,INSR,KCNH2,SOX2,BMPR2,DYRK1A,NSD1,ATM,MYO6,JAZF1,LRP8,USF1,RELN,TOX,KLF6,SIX5,MBTPS2,CHD2,DDX3X,LPIN1,PRICKLE1,DICER1,MED14,TSFM,INO80,ZFX,TEAD1,CUX2,EWSR1,SMAD7,MED13L,NUCKS1,ARRB1,POLR1C,ATAD2B,MAPK8,CREM,NFATC3,USF2,CAMKK2,DNMT3A,HSPA8,GPBP1,HNRNPK,NFX1,HSF2,APBB1,PFDN5,PSPC1,RARG,BRWD1,ARID5B,NACA,SALL3,SRCAP,LARP7,NR1D1,ZBTB18,ELP4,ADCY1,PPIE,WAC,USP7…
GO:BP	regulation of circadian rhythm	GO:0042752	0.0379564	1.42071	120	642	14	21092	TARDBP,GNAQ,MAPK8,PSPC1,NR1D1,ADCY1,USP7,SIN3A,PRKDC,FBXL3,PHLPP1,USP9X,NLGN1,USP2
GO:BP	ribonucleotide metabolic process	GO:0009259	0.0387915	1.41126	466	642	32	21092	ATP1A2,NDUFS4,DPYD,INSR,IMPDH1,ADCY9,PAPSS2,DNM1L,SLC4A4,NT5C3A,PGM1,TECR,GART,HSPA8,PDE7A,ATP5F1E,ADCY5,ADCY1,FAR1,NT5C2,SLC25A16,OLA1,ATP5F1C,PDK3,GUCY1A2,ZBTB7A,PGAM1,NPPC,HSD17B4,NCOR1,FITM2,ENTPD7
GO:BP	neuron projection organization	GO:0106027	0.0388947	1.41011	90	642	12	21092	ATP1A3,DLG4,INSR,PAFAH1B1,LRP8,RELN,CUX2,CAMK2B,KIF1A,GRIN2B,NLGN1,ITGA3
GO:BP	regulation of postsynapse organization	GO:0099175	0.0388947	1.41011	90	642	12	21092	PAFAH1B1,LRP8,RELN,CDH2,CUX2,CAMK2B,HSPA8,KIF1A,NRCAM,GRIN2B,NLGN1,NTRK3
GO:BP	telencephalon development	GO:0021537	0.0406847	1.39057	262	642	22	21092	ATP1A2,ATP1A3,RPGRIP1L,NF2,BBS4,PAFAH1B1,LRP8,RELN,CDH2,NUMB,GART,BCAN,DIXDC1,TNR,BCL11B,LHX1,EOMES,SEMA3A,PLXNA4,RYK,DAB1,HES5
GO:BP	transmembrane transport	GO:0055085	0.0415992	1.38091	1538	642	76	21092	ATP1A2,ATP1A3,IRS2,DLG4,PKD2,INSR,ABCC8,KCNH2,SLC22A5,HTT,GRIK3,CACNA1A,AKAP9,SLC25A3,GABRA4,RELN,SCN1A,TUSC3,KCND1,SLC4A4,SCN9A,KCNK9,FHL1,NOS1AP,CACNB2,SLC35A1,CLCN2,CRBN,OPRM1,GPD1L,VDAC1,TST,ANO10,SORT1,PTK2B,AQP4,DAPK1,ANK3,RASGRF2,TRPC3,TRPC1,TRDN,SLC24A1,SORBS1,CACNA2D2,KCNB1,KCNC1,HPCA,CACNA1B,KCNAB1,SLC25A16,APPL1,CNNM1,AHNAK,SLC6A17,DIAPH1,ATP2B2,SUMO1,SLC25A40,SLC7A10,SLC17A7,GRIN2B,WN…
GO:BP	regulation of cell communication	GO:0010646	0.0425628	1.37097	3363	642	142	21092	BRCA1,ATP1A2,IRS2,MAP2K1,DLG4,PKD2,FKTN,INSR,ABCC8,RPGRIP1L,NF2,SOX2,BMPR2,DYRK1A,HTT,PAFAH1B1,ATM,GRIK3,LRP8,CACNA1A,AKAP9,PCDH11Y,RELN,CDH2,PPP2R1B,DNM1L,MCC,DDX3X,PRICKLE1,RAP1GAP2,MYO9B,NOS1AP,GNAI2,CACNB2,KIAA0319,ARHGEF9,INHA,MYH7B,ARHGEF28,OPRM1,CUX2,SMAD7,GPD1L,NUCKS1,PLEKHA1,GNAQ,ARRB1,RGS6,CAMK2B,PTK2B,HNRNPK,PFDN5,DNM1,DAPK1,GIT2,ANK3,FZD8,RASGRF2,MARK3,TRDN,SLC24A1,GAS1,PLCB4,SERPINE2…
GO:BP	regulation of locomotion	GO:0040012	0.0433951	1.36256	1030	642	56	21092	IRS2,INSR,ABCC8,NF2,BMPR2,BBS4,ATM,RELN,DNM1L,MCC,KRIT1,GNAI2,MOSPD2,LRCH1,SMAD7,SEMA4A,DOCK4,NUMB,CAMK2B,PTK2B,STC1,SERPINE2,AAMP,APPL1,MAPRE2,TNR,ARRDC3,SEMA3D,RUFY3,RIPOR2,SRGAP1,SIN3A,IGFBP5,KITLG,PLAA,SST,DIAPH1,ADAMTS9,ITGA5,VEGFB,NBL1,SAP30L,SCRT2,SHTN1,LRIG2,UNC5C,SEMA3A,PLXNA4,TET1,NTRK3,BRAF,ITGA3,RYK,PFN1,SEMA3G,MAP2K5
GO:BP	negative regulation of cell projection organization	GO:0031345	0.0437106	1.35941	189	642	18	21092	PAFAH1B1,KIAA0319,SEMA4A,STX1B,TNR,SEMA3D,RUFY3,ARHGAP24,SYNGAP1,GRIN2B,NLGN1,LRIG2,SEMA3A,ITGA3,RYK,DAB1,FAT3,SEMA3G
GO:BP	cell communication	GO:0007154	0.0460467	1.3368	6551	642	248	21092	BRCA1,STAT5B,FHIT,PHEX,ATP1A2,ATP1A3,KIF1B,IRS2,MAP2K1,DLG4,PKD2,AHI1,FKTN,INSR,ABCC8,SPG11,RPGRIP1L,PKP2,NF2,SOX2,EIF2B4,BMPR2,DYRK1A,HTT,BBS4,PAFAH1B1,ATM,MYO6,ADCY9,GRIK3,LRP8,CACNA1A,USF1,AKAP9,PCDH11Y,GABRA4,LIFR,RELN,SCN1A,CDH2,PPP2R1B,SNCB,DNM1L,MCC,MBTPS2,SCN9A,DDX3X,KIFAP3,KRIT1,PRICKLE1,RAP1GAP2,MYO9B,NOS1AP,GNAI2,CACNB2,KIAA0319,DICER1,LTBP3,GPR34,ARHGEF9,INHA,MYH7B,ARHGEF28,PIKFYVE,OP…
GO:BP	locomotory behavior	GO:0007626	0.046761	1.33012	208	642	19	21092	ATP1A2,DLG4,SPG11,PAFAH1B1,RELN,SCN1A,CRBN,SPTBN4,DDHD2,ADCY5,PREX2,TNR,ARRDC3,ARCN1,STRN,PDE1B,DAB1,NCOR1,USP2
GO:BP	regulation of cell motility	GO:2000145	0.0488894	1.31079	985	642	54	21092	IRS2,INSR,ABCC8,NF2,BMPR2,BBS4,ATM,RELN,DNM1L,MCC,KRIT1,GNAI2,MOSPD2,LRCH1,SMAD7,SEMA4A,DOCK4,NUMB,CAMK2B,PTK2B,STC1,SERPINE2,AAMP,APPL1,MAPRE2,TNR,SEMA3D,RUFY3,RIPOR2,SRGAP1,SIN3A,IGFBP5,KITLG,PLAA,SST,DIAPH1,ADAMTS9,ITGA5,VEGFB,NBL1,SAP30L,SCRT2,SHTN1,LRIG2,UNC5C,SEMA3A,PLXNA4,TET1,NTRK3,BRAF,ITGA3,PFN1,SEMA3G,MAP2K5
GO:BP	nucleobase-containing small molecule metabolic process	GO:0055086	0.0490029	1.30978	674	642	41	21092	FHIT,ATP1A2,NDUFS4,PC,DPYD,INSR,IMPDH1,ADCY9,PAPSS2,DNM1L,ALDH6A1,SLC4A4,ALDH1L2,NT5C3A,PGM1,GPD1L,TECR,GART,HSPA8,PDE7A,ATP5F1E,ADCY5,ADCY1,NADK2,FAR1,HPCA,NT5C2,SLC25A16,OLA1,ATP5F1C,PDK3,GUCY1A2,ZBTB7A,PGAM1,NPPC,HSD17B4,NCOR1,SMUG1,FITM2,IDH2,ENTPD7

## Sheet: HvR_PFC
source	term_name	term_id	adjusted_p_value	negative_log10_of_adjusted_p_value	term_size	query_size	intersection_size	effective_domain_size	intersections
GO:BP	anatomical structure development	GO:0048856	3.8e-13	12.4206	5836	259	134	21092	CNTNAP2,APP,PTPN11,DLD,PRKN,CDKL5,DCTN1,SOX2,LRP8,SMAD3,IMPDH2,PPP2R1B,PAPSS2,TRPS1,AMELX,TCF7L2,CNTN4,CTNNB1,PTCH2,DLG3,SLC1A3,HUWE1,NCOA3,INHA,NEBL,SLC9A6,PTCHD1,SF1,RAD51B,ROBO2,KMT2A,KMT2D,ABL2,TIAL1,DDX17,ALCAM,CDON,XRCC5,SSH1,DAB2,AFF4,SRA1,SMARCA2,KLHL3,NR1D1,KDM2B,POGLUT1,PPP1R9B,FMN2,TUBB2A,FMN1,HERC1,ARHGAP35,HDAC1,PREX2,THBS4,PLXNC1,COBL,L3MBTL3,ARID2,AFF3,MAP4,SIN3A,BTBD7,HES5,NFIA,EG…
GO:BP	developmental process	GO:0032502	5.22e-13	12.2825	6424	259	142	21092	CNTNAP2,APP,PTPN11,DLD,PRKN,CDKL5,DCTN1,SOX2,LRP8,SMAD3,IMPDH2,PPP2R1B,PAPSS2,TRPS1,AMELX,TCF7L2,CNTN4,CTNNB1,PTCH2,DLG3,SLC1A3,HUWE1,NCOA3,INHA,NEBL,SLC9A6,PTCHD1,SF1,RAD51B,ROBO2,KMT2A,KMT2D,ABL2,TIAL1,HSF2,DDX17,ALCAM,CDON,XRCC5,SSH1,DAB2,AFF4,SRA1,SMARCA2,KLHL3,NR1D1,KDM2B,POGLUT1,PPP1R9B,ABCA5,FMN2,LRMDA,TUBB2A,FMN1,HERC1,ARHGAP35,HDAC1,PREX2,CLTC,THBS4,PLXNC1,COBL,L3MBTL3,ARID2,AFF3,MAP4,SI…
GO:BP	positive regulation of cellular process	GO:0048522	1.31e-12	11.882	5641	259	130	21092	CNTNAP2,APP,PTPN11,PRKAG2,PRKN,CDKL5,DCTN1,SOX2,LRP8,UBQLN1,CSNK2A1,SMAD3,PPP2R1B,TCF7L2,GRM1,CTNNB1,PTCH2,DLG3,SLC1A3,HUWE1,NCOA3,INHA,MOSPD2,RAD51B,ROBO2,KMT2A,KMT2D,ARRB1,ABL2,CKS1B,TIAL1,DNAJB2,HNRNPK,HSF2,DDX17,CDON,XRCC5,CACNB3,DAB2,RBM5,SRA1,CACNG2,CRADD,SMARCA2,SF3B4,NR1D1,KDM2B,MAP2K4,POGLUT1,PPP1R9B,FMN2,PTRH2,FMN1,ARHGAP35,HDAC1,THBS4,PLXNC1,COBL,ARID2,SIN3A,RPS4X,HES5,GPR137C,NFIA,EGF…
GO:BP	positive regulation of biological process	GO:0048518	1.65e-11	10.7835	6309	259	137	21092	CNTNAP2,APP,PTPN11,PRKAG2,PRKN,CDKL5,DCTN1,SOX2,LRP8,UBQLN1,GATM,CSNK2A1,SMAD3,PPP2R1B,AMELX,TCF7L2,GRM1,CTNNB1,PTCH2,DLG3,SLC1A3,HUWE1,NCOA3,INHA,MOSPD2,RAD51B,FBXO33,ROBO2,KMT2A,KMT2D,ARRB1,ABL2,CKS1B,TIAL1,DNAJB2,HNRNPK,HSF2,DDX17,CDON,XRCC5,CACNB3,DAB2,RBM5,SRA1,CACNG2,CRADD,SMARCA2,SF3B4,NR1D1,KDM2B,MAP2K4,POGLUT1,PPP1R9B,ABCA5,FMN2,PTRH2,FMN1,ARHGAP35,HDAC1,THBS4,PLXNC1,COBL,ARID2,SIN3A,RPS…
GO:BP	neurogenesis	GO:0022008	1.85e-11	10.7334	1680	259	61	21092	CNTNAP2,APP,PTPN11,PRKN,CDKL5,SOX2,LRP8,CNTN4,CTNNB1,SLC1A3,SLC9A6,ROBO2,ABL2,ALCAM,CDON,XRCC5,DAB2,NR1D1,PPP1R9B,TUBB2A,HERC1,ARHGAP35,HDAC1,PREX2,PLXNC1,COBL,MAP4,SIN3A,HES5,NRXN3,TCF4,RIMS2,STXBP1,HOOK3,VSTM2L,USP9X,NLGN1,ADGRL3,REST,EFNA5,SEMA5A,PLXNA4,CPEB3,NTRK3,EPHA7,RB1,BMPR1B,BMPR2,NR2F2,RARA,HIF1A,SNAP25,RERE,MYRF,GABRB2,SPEN,TENM4,INSM1,DNAAF4,CREB3L2,TNC
GO:BP	generation of neurons	GO:0048699	3.56e-11	10.4485	1465	259	56	21092	CNTNAP2,APP,PTPN11,PRKN,CDKL5,SOX2,LRP8,CNTN4,CTNNB1,SLC1A3,SLC9A6,ROBO2,ABL2,ALCAM,CDON,DAB2,PPP1R9B,TUBB2A,HERC1,ARHGAP35,HDAC1,PREX2,PLXNC1,COBL,MAP4,SIN3A,HES5,NRXN3,TCF4,RIMS2,STXBP1,VSTM2L,USP9X,NLGN1,ADGRL3,REST,EFNA5,SEMA5A,PLXNA4,CPEB3,NTRK3,EPHA7,RB1,BMPR1B,BMPR2,NR2F2,RARA,HIF1A,SNAP25,RERE,GABRB2,TENM4,INSM1,DNAAF4,CREB3L2,TNC
GO:BP	multicellular organism development	GO:0007275	1.85e-10	9.73252	4823	259	113	21092	CNTNAP2,APP,PTPN11,DLD,PRKN,CDKL5,DCTN1,SOX2,LRP8,SMAD3,IMPDH2,PAPSS2,TRPS1,AMELX,TCF7L2,CNTN4,CTNNB1,PTCH2,SLC1A3,NCOA3,INHA,NEBL,SLC9A6,PTCHD1,SF1,RAD51B,ROBO2,KMT2A,ABL2,ALCAM,CDON,XRCC5,DAB2,SMARCA2,KLHL3,NR1D1,KDM2B,POGLUT1,PPP1R9B,TUBB2A,FMN1,HERC1,ARHGAP35,HDAC1,PREX2,THBS4,PLXNC1,COBL,L3MBTL3,ARID2,AFF3,MAP4,SIN3A,BTBD7,HES5,NFIA,TFE3,LSAMP,NRXN3,MAP2K6,ETS1,TCF4,RIMS2,CTSC,STXBP1,DLX6,GP…
GO:BP	system development	GO:0048731	1.96e-10	9.70873	4369	259	106	21092	CNTNAP2,APP,PTPN11,PRKN,CDKL5,DCTN1,SOX2,LRP8,SMAD3,IMPDH2,PAPSS2,TRPS1,AMELX,TCF7L2,CNTN4,CTNNB1,SLC1A3,INHA,NEBL,SLC9A6,PTCHD1,SF1,ROBO2,KMT2A,ABL2,ALCAM,CDON,XRCC5,DAB2,SMARCA2,KLHL3,NR1D1,KDM2B,POGLUT1,PPP1R9B,TUBB2A,FMN1,HERC1,ARHGAP35,HDAC1,PREX2,THBS4,PLXNC1,COBL,L3MBTL3,ARID2,MAP4,SIN3A,BTBD7,HES5,NFIA,TFE3,LSAMP,NRXN3,MAP2K6,ETS1,TCF4,RIMS2,CTSC,STXBP1,DLX6,GPC6,CLIC4,TTLL5,HOOK3,VSTM2L,…
GO:BP	cell development	GO:0048468	2.51e-10	9.60024	2142	259	68	21092	CNTNAP2,APP,PTPN11,DLD,PRKN,CDKL5,LRP8,SMAD3,CNTN4,CTNNB1,SLC1A3,NEBL,SLC9A6,ROBO2,KMT2D,ABL2,TIAL1,ALCAM,XRCC5,DAB2,AFF4,SMARCA2,NR1D1,PPP1R9B,FMN2,HERC1,ARHGAP35,HDAC1,PREX2,PLXNC1,COBL,L3MBTL3,MAP4,SIN3A,HES5,NRXN3,RIMS2,STXBP1,CLIC4,HOOK3,VSTM2L,USP9X,NEB,NLGN1,REST,EFNA5,SEMA5A,PLXNA4,CPEB3,NTRK3,EPHA7,HSD17B4,RB1,BMPR1B,BMPR2,ZBTB16,RARA,HIF1A,SNAP25,ARID5B,RERE,MYRF,GABRB2,SPEN,TENM4,INSM1…
GO:BP	nervous system development	GO:0007399	5.48e-10	9.26146	2504	259	74	21092	CNTNAP2,APP,PTPN11,PRKN,CDKL5,DCTN1,SOX2,LRP8,CNTN4,CTNNB1,SLC1A3,SLC9A6,PTCHD1,ROBO2,ABL2,ALCAM,CDON,XRCC5,DAB2,SMARCA2,NR1D1,KDM2B,PPP1R9B,TUBB2A,HERC1,ARHGAP35,HDAC1,PREX2,PLXNC1,COBL,MAP4,SIN3A,HES5,NFIA,LSAMP,NRXN3,TCF4,RIMS2,CTSC,STXBP1,DLX6,GPC6,HOOK3,VSTM2L,USP9X,NLGN1,PCDH19,ADGRL3,REST,EFNA5,SEMA5A,PLXNA4,CPEB3,NTRK3,EPHA7,RB1,BMPR1B,BMPR2,ZBTB16,NR2F2,RARA,HIF1A,SNAP25,RERE,MYRF,GABRB2…
GO:BP	neuron differentiation	GO:0030182	9.5e-10	9.02209	1393	259	52	21092	CNTNAP2,APP,PTPN11,PRKN,CDKL5,SOX2,LRP8,CNTN4,CTNNB1,SLC1A3,SLC9A6,ROBO2,ABL2,ALCAM,CDON,DAB2,PPP1R9B,HERC1,ARHGAP35,HDAC1,PREX2,PLXNC1,COBL,MAP4,SIN3A,HES5,NRXN3,TCF4,RIMS2,STXBP1,VSTM2L,USP9X,NLGN1,REST,EFNA5,SEMA5A,PLXNA4,CPEB3,NTRK3,EPHA7,RB1,BMPR1B,BMPR2,RARA,HIF1A,SNAP25,RERE,GABRB2,TENM4,INSM1,CREB3L2,TNC
GO:BP	positive regulation of nitrogen compound metabolic process	GO:0051173	2.15e-09	8.6679	3152	259	84	21092	APP,PTPN11,PRKAG2,PRKN,SOX2,LRP8,UBQLN1,CSNK2A1,SMAD3,TCF7L2,CTNNB1,DLG3,HUWE1,NCOA3,INHA,FBXO33,KMT2A,KMT2D,ARRB1,CKS1B,DNAJB2,HNRNPK,HSF2,DDX17,CDON,XRCC5,DAB2,SRA1,CRADD,SMARCA2,SF3B4,NR1D1,FMN2,HDAC1,THBS4,ARID2,SIN3A,RPS4X,HES5,NFIA,ZBTB18,TFE3,MAP2K6,ETS1,TCF4,CTSC,SPON1,RALBP1,DAZAP2,OTUD6B,GATAD2B,BABAM2,TCF20,USP9X,WNK3,ZNF225,SLF2,REST,EFNA5,CPEB3,NTRK3,ZFP90,EPHA7,ATAD2,RB1,BMPR1B,BMPR…
GO:BP	neuron development	GO:0048666	4.24e-09	8.37221	1122	259	45	21092	CNTNAP2,APP,PTPN11,PRKN,CDKL5,LRP8,CNTN4,CTNNB1,SLC1A3,SLC9A6,ROBO2,ABL2,ALCAM,DAB2,PPP1R9B,HERC1,ARHGAP35,PREX2,PLXNC1,COBL,MAP4,SIN3A,HES5,NRXN3,RIMS2,STXBP1,VSTM2L,USP9X,NLGN1,EFNA5,SEMA5A,PLXNA4,CPEB3,NTRK3,EPHA7,RB1,BMPR1B,BMPR2,SNAP25,RERE,GABRB2,TENM4,INSM1,CREB3L2,TNC
GO:BP	neuron projection development	GO:0031175	9.15e-09	8.03868	970	259	41	21092	CNTNAP2,APP,PTPN11,PRKN,CDKL5,LRP8,CNTN4,CTNNB1,SLC9A6,ROBO2,ABL2,ALCAM,DAB2,PPP1R9B,HERC1,ARHGAP35,PREX2,PLXNC1,COBL,MAP4,SIN3A,HES5,NRXN3,RIMS2,STXBP1,VSTM2L,USP9X,NLGN1,EFNA5,SEMA5A,PLXNA4,CPEB3,NTRK3,EPHA7,RB1,BMPR1B,BMPR2,SNAP25,RERE,CREB3L2,TNC
GO:BP	positive regulation of cellular metabolic process	GO:0031325	1.69e-08	7.77099	3094	259	81	21092	APP,PTPN11,PRKAG2,PRKN,SOX2,LRP8,UBQLN1,SMAD3,TCF7L2,CTNNB1,DLG3,NCOA3,INHA,KMT2A,KMT2D,ARRB1,CKS1B,DNAJB2,HNRNPK,HSF2,DDX17,CDON,XRCC5,DAB2,SRA1,SMARCA2,SF3B4,NR1D1,FMN2,HDAC1,THBS4,ARID2,SIN3A,RPS4X,HES5,NFIA,ZBTB18,TFE3,MAP2K6,ETS1,TCF4,RALBP1,DAZAP2,OTUD6B,GATAD2B,BABAM2,TCF20,USP9X,WNK3,ZNF225,SLF2,LPGAT1,REST,EFNA5,CPEB3,NTRK3,ZFP90,EPHA7,ATAD2,RB1,BMPR1B,BMPR2,ZBTB16,MBTPS2,APBB2,WWC1,NR2F…
GO:BP	regulation of developmental process	GO:0050793	3.8e-08	7.42022	2499	259	70	21092	APP,PTPN11,PRKN,CDKL5,SOX2,LRP8,SMAD3,TRPS1,AMELX,TCF7L2,CNTN4,CTNNB1,PTCH2,HUWE1,NCOA3,INHA,ROBO2,DDX17,CDON,XRCC5,DAB2,SRA1,SMARCA2,NR1D1,KDM2B,POGLUT1,ABCA5,ARHGAP35,HDAC1,THBS4,PLXNC1,COBL,ARID2,SIN3A,BTBD7,HES5,TFE3,ETS1,TCF4,RIMS2,CTSC,GPC6,RALBP1,GATAD2B,TMEM135,HOOK3,NLGN1,REST,EFNA5,SEMA5A,PLXNA4,CPEB3,NTRK3,EPHA7,RHOBTB1,RB1,BMPR1B,BMPR2,ZBTB16,ATP11C,WWC1,RARA,HIF1A,MYRF,SPEN,TENM4,ELA…
GO:BP	positive regulation of metabolic process	GO:0009893	5.66e-08	7.24752	3849	259	92	21092	APP,PTPN11,PRKAG2,PRKN,SOX2,LRP8,UBQLN1,GATM,CSNK2A1,SMAD3,AMELX,TCF7L2,CTNNB1,DLG3,HUWE1,NCOA3,INHA,FBXO33,KMT2A,KMT2D,ARRB1,CKS1B,DNAJB2,HNRNPK,HSF2,DDX17,CDON,XRCC5,DAB2,SRA1,CRADD,SMARCA2,SF3B4,NR1D1,FMN2,HDAC1,THBS4,ARID2,SIN3A,RPS4X,HES5,NFIA,ZBTB18,TFE3,MAP2K6,ETS1,TCF4,CTSC,SPON1,RALBP1,DAZAP2,OTUD6B,GATAD2B,BABAM2,TCF20,USP9X,WNK3,ZNF225,SLF2,LPGAT1,REST,EFNA5,CPEB3,NTRK3,ZFP90,EPHA7,ATA…
GO:BP	cell differentiation	GO:0030154	7.61e-08	7.11833	4256	259	98	21092	CNTNAP2,APP,PTPN11,DLD,PRKN,CDKL5,SOX2,LRP8,SMAD3,TRPS1,AMELX,TCF7L2,CNTN4,CTNNB1,PTCH2,SLC1A3,HUWE1,NCOA3,INHA,NEBL,SLC9A6,SF1,ROBO2,KMT2D,ABL2,TIAL1,DDX17,ALCAM,CDON,XRCC5,DAB2,AFF4,SRA1,SMARCA2,NR1D1,PPP1R9B,ABCA5,FMN2,LRMDA,TUBB2A,HERC1,ARHGAP35,HDAC1,PREX2,CLTC,PLXNC1,COBL,L3MBTL3,ARID2,MAP4,SIN3A,HES5,TFE3,NRXN3,MAP2K6,ETS1,TCF4,RIMS2,STXBP1,DLX6,CLIC4,GATAD2B,HOOK3,VSTM2L,USP9X,NEB,NLGN1,N…
GO:BP	cellular developmental process	GO:0048869	1.06e-07	6.97439	4280	259	98	21092	CNTNAP2,APP,PTPN11,DLD,PRKN,CDKL5,SOX2,LRP8,SMAD3,TRPS1,AMELX,TCF7L2,CNTN4,CTNNB1,PTCH2,SLC1A3,HUWE1,NCOA3,INHA,NEBL,SLC9A6,SF1,ROBO2,KMT2D,ABL2,TIAL1,DDX17,ALCAM,CDON,XRCC5,DAB2,AFF4,SRA1,SMARCA2,NR1D1,PPP1R9B,ABCA5,FMN2,LRMDA,TUBB2A,HERC1,ARHGAP35,HDAC1,PREX2,CLTC,PLXNC1,COBL,L3MBTL3,ARID2,MAP4,SIN3A,HES5,TFE3,NRXN3,MAP2K6,ETS1,TCF4,RIMS2,STXBP1,DLX6,CLIC4,GATAD2B,HOOK3,VSTM2L,USP9X,NEB,NLGN1,N…
GO:BP	animal organ development	GO:0048513	1.32e-07	6.88041	3591	259	87	21092	CNTNAP2,APP,PTPN11,DCTN1,SOX2,LRP8,SMAD3,IMPDH2,PAPSS2,TRPS1,AMELX,TCF7L2,CNTN4,CTNNB1,PTCH2,NCOA3,INHA,NEBL,PTCHD1,SF1,ROBO2,KMT2A,DDX17,CDON,XRCC5,DAB2,SMARCA2,KLHL3,KDM2B,POGLUT1,PPP1R9B,FMN1,HERC1,ARHGAP35,HDAC1,COBL,L3MBTL3,ARID2,SIN3A,BTBD7,HES5,NFIA,EGFLAM,ZBTB18,TFE3,MAP2K6,ETS1,DLX6,GPC6,CLIC4,TTLL5,HOOK3,NEB,PCDH19,NHS,ADGRL3,REST,SEMA5A,PLXNA4,USP2,NTRK3,EPHA7,HSD17B4,RB1,DISP1,BMPR1B,…
GO:BP	growth	GO:0040007	1.54e-07	6.81147	972	259	39	21092	APP,PTPN11,PRKN,CDKL5,SOX2,CSNK2A1,SMAD3,CTNNB1,PTCH2,SLC9A6,RAD51B,KMT2D,DNAJB2,ALCAM,DAB2,SMARCA2,KDM2B,PPP1R9B,FMN1,COBL,ARID2,SIN3A,RIMS2,CLIC4,USP9X,EFNA5,SEMA5A,PLXNA4,EPHA7,RB1,BMPR1B,BMPR2,WWC1,RARA,HIF1A,ARID5B,IGFBP7,TENM4,TNC
GO:BP	regulation of cellular process	GO:0050794	2.2e-07	6.65793	11130	259	187	21092	CNTNAP2,APP,PTPN11,PRKAG2,DLD,PRKN,CDKL5,DCTN1,SOX2,LRP8,UBQLN1,SCN1A,CSNK2A1,SMAD3,PPP2R1B,TRPS1,AMELX,TCF7L2,CNTN4,GRM1,CTNNB1,PTCH2,DLG3,SLC1A3,HUWE1,NCOA3,INHA,MOSPD2,SLC9A6,PTCHD1,PDS5B,SF1,RAD51B,ROBO2,KMT2A,KMT2D,ARHGEF12,ARRB1,ABL2,CKS1B,TIAL1,DST,DNAJB2,HNRNPK,HSF2,DDX17,ALCAM,ERLEC1,CDON,XRCC5,SSH1,CACNB3,DAB2,SALL3,RBM5,SRA1,CACNG2,CRADD,SMARCA2,SF3B4,PLCB4,NR1D1,KDM2B,MAP2K4,POGLUT1,P…
GO:BP	multicellular organismal process	GO:0032501	2.36e-07	6.62719	7463	259	142	21092	CNTNAP2,APP,PTPN11,DLD,PRKN,CDKL5,DCTN1,SOX2,F8,LRP8,GATM,SCN1A,SMAD3,IMPDH2,PAPSS2,TRPS1,AMELX,TCF7L2,CNTN4,GRM1,CTNNB1,PTCH2,SLC1A3,HUWE1,NCOA3,INHA,NEBL,SLC9A6,PTCHD1,SF1,RAD51B,ROBO2,KMT2A,KMT2D,ARRB1,ABL2,TIAL1,HNRNPK,HSF2,ALCAM,CDON,XRCC5,DAB2,AFF4,CACNG2,SMARCA2,KLHL3,NDUFA12,NR1D1,KDM2B,POGLUT1,PPP1R9B,ABCA5,FMN2,TUBB2A,FMN1,HERC1,ARHGAP35,HDAC1,PREX2,CLTC,GRIA1,THBS4,PLXNC1,PPIP5K2,COBL,…
GO:BP	anatomical structure morphogenesis	GO:0009653	2.52e-07	6.59792	2722	259	72	21092	CNTNAP2,APP,PTPN11,DLD,PRKN,CDKL5,SOX2,LRP8,SMAD3,PPP2R1B,AMELX,CNTN4,CTNNB1,DLG3,SLC1A3,HUWE1,NEBL,SLC9A6,ROBO2,ALCAM,CDON,SSH1,DAB2,KLHL3,KDM2B,POGLUT1,FMN1,HERC1,ARHGAP35,HDAC1,PREX2,THBS4,PLXNC1,COBL,ARID2,AFF3,SIN3A,BTBD7,HES5,EGFLAM,NRXN3,ETS1,RIMS2,STXBP1,DLX6,GPC6,RALBP1,CLIC4,TMEM135,VSTM2L,USP9X,NEB,NLGN1,CDH24,EFNA5,SEMA5A,PLXNA4,EPHA7,RHOBTB1,RB1,BMPR1B,BMPR2,ZBTB16,NR2F2,RARA,HIF1A,A…
GO:BP	cell growth	GO:0016049	2.63e-07	6.58071	497	259	27	21092	APP,PRKN,CDKL5,CSNK2A1,SMAD3,CTNNB1,PTCH2,SLC9A6,KMT2D,DNAJB2,ALCAM,DAB2,SMARCA2,KDM2B,PPP1R9B,COBL,SIN3A,RIMS2,USP9X,EFNA5,SEMA5A,PLXNA4,EPHA7,RB1,BMPR2,IGFBP7,TNC
GO:BP	positive regulation of macromolecule metabolic process	GO:0010604	3.65e-07	6.43713	3535	259	85	21092	APP,PTPN11,PRKAG2,PRKN,SOX2,LRP8,UBQLN1,CSNK2A1,SMAD3,TCF7L2,CTNNB1,DLG3,HUWE1,NCOA3,INHA,FBXO33,KMT2A,KMT2D,ARRB1,CKS1B,DNAJB2,HNRNPK,HSF2,DDX17,CDON,XRCC5,DAB2,SRA1,CRADD,SMARCA2,SF3B4,NR1D1,FMN2,HDAC1,THBS4,ARID2,SIN3A,RPS4X,HES5,NFIA,ZBTB18,TFE3,MAP2K6,ETS1,TCF4,CTSC,SPON1,RALBP1,DAZAP2,OTUD6B,GATAD2B,BABAM2,TCF20,USP9X,WNK3,ZNF225,SLF2,REST,EFNA5,CPEB3,NTRK3,ZFP90,EPHA7,ATAD2,RB1,BMPR1B,BMPR…
GO:BP	biological regulation	GO:0065007	8.58e-07	6.0663	13096	259	207	21092	CNTNAP2,APP,PTPN11,PRKAG2,DLD,PRKN,CDKL5,DCTN1,SOX2,F8,LRP8,UBQLN1,GATM,SCN1A,CSNK2A1,SMAD3,PPP2R1B,PAPSS2,TRPS1,AMELX,TWNK,TCF7L2,CNTN4,GRM1,KCNK9,CTNNB1,PTCH2,DLG3,SLC1A3,HUWE1,NCOA3,INHA,MOSPD2,SLC9A6,PTCHD1,PDS5B,SF1,RAD51B,FBXO33,ROBO2,KMT2A,KMT2D,ARHGEF12,ARRB1,ABL2,CKS1B,TIAL1,DST,DNAJB2,HNRNPK,HSF2,DDX17,ALCAM,ERLEC1,CDON,XRCC5,SSH1,CACNB3,DAB2,AFF4,SALL3,RBM5,SRA1,CACNG2,CRADD,SMARCA2,KL…
GO:BP	regulation of nervous system development	GO:0051960	8.79e-07	6.05624	451	259	25	21092	CDKL5,LRP8,CTNNB1,ROBO2,XRCC5,NR1D1,HDAC1,PLXNC1,HES5,CTSC,HOOK3,NLGN1,REST,EFNA5,SEMA5A,PLXNA4,NTRK3,EPHA7,RB1,BMPR2,RARA,HIF1A,MYRF,SPEN,TENM4
GO:BP	neuron projection morphogenesis	GO:0048812	2.6837e-06	5.57126	632	259	29	21092	CNTNAP2,APP,PTPN11,PRKN,CDKL5,LRP8,CNTN4,CTNNB1,SLC9A6,ROBO2,ALCAM,ARHGAP35,PREX2,PLXNC1,COBL,SIN3A,NRXN3,RIMS2,STXBP1,VSTM2L,USP9X,NLGN1,EFNA5,SEMA5A,PLXNA4,EPHA7,BMPR1B,BMPR2,RERE
GO:BP	positive regulation of biosynthetic process	GO:0009891	3.3871e-06	5.47018	2069	259	58	21092	APP,PRKN,SOX2,SMAD3,AMELX,TCF7L2,CTNNB1,NCOA3,KMT2A,KMT2D,ARRB1,HNRNPK,HSF2,DDX17,CDON,XRCC5,DAB2,SRA1,SMARCA2,NR1D1,HDAC1,SIN3A,RPS4X,HES5,NFIA,ZBTB18,TFE3,MAP2K6,ETS1,TCF4,OTUD6B,GATAD2B,TCF20,ZNF225,LPGAT1,REST,CPEB3,ZFP90,ATAD2,RB1,BMPR1B,BMPR2,ZBTB16,MBTPS2,APBB2,WWC1,NR2F2,NUCKS1,RARA,HIF1A,CLCN3,HIVEP3,ARID5B,RNF20,RERE,MYRF,ELAVL1,CREB3L2
GO:BP	regulation of cell differentiation	GO:0045595	3.7862e-06	5.4218	1587	259	49	21092	APP,PTPN11,CDKL5,SOX2,LRP8,SMAD3,TRPS1,TCF7L2,CNTN4,CTNNB1,PTCH2,NCOA3,INHA,ROBO2,DDX17,CDON,XRCC5,DAB2,SRA1,SMARCA2,NR1D1,ABCA5,HDAC1,PLXNC1,ARID2,SIN3A,HES5,TFE3,ETS1,TCF4,GATAD2B,HOOK3,NLGN1,REST,EFNA5,SEMA5A,PLXNA4,NTRK3,EPHA7,RB1,BMPR1B,BMPR2,ZBTB16,ATP11C,RARA,HIF1A,SPEN,TENM4,INSM1
GO:BP	cellular component morphogenesis	GO:0032989	4.033e-06	5.39437	770	259	32	21092	CNTNAP2,APP,PTPN11,PRKN,CDKL5,LRP8,CNTN4,CTNNB1,NEBL,SLC9A6,ROBO2,ALCAM,ARHGAP35,PREX2,PLXNC1,COBL,SIN3A,NRXN3,RIMS2,STXBP1,VSTM2L,USP9X,NEB,NLGN1,EFNA5,SEMA5A,PLXNA4,EPHA7,BMPR1B,BMPR2,RERE,TENM4
GO:BP	plasma membrane bounded cell projection morphogenesis	GO:0120039	4.5749e-06	5.33962	647	259	29	21092	CNTNAP2,APP,PTPN11,PRKN,CDKL5,LRP8,CNTN4,CTNNB1,SLC9A6,ROBO2,ALCAM,ARHGAP35,PREX2,PLXNC1,COBL,SIN3A,NRXN3,RIMS2,STXBP1,VSTM2L,USP9X,NLGN1,EFNA5,SEMA5A,PLXNA4,EPHA7,BMPR1B,BMPR2,RERE
GO:BP	positive regulation of macromolecule biosynthetic process	GO:0010557	5.1148e-06	5.29117	1925	259	55	21092	APP,PRKN,SOX2,SMAD3,TCF7L2,CTNNB1,NCOA3,KMT2A,KMT2D,ARRB1,HNRNPK,HSF2,DDX17,CDON,XRCC5,DAB2,SRA1,SMARCA2,NR1D1,HDAC1,SIN3A,RPS4X,HES5,NFIA,ZBTB18,TFE3,MAP2K6,ETS1,TCF4,OTUD6B,GATAD2B,TCF20,ZNF225,REST,CPEB3,ZFP90,ATAD2,RB1,BMPR1B,BMPR2,ZBTB16,MBTPS2,APBB2,WWC1,NR2F2,NUCKS1,RARA,HIF1A,HIVEP3,ARID5B,RNF20,RERE,MYRF,ELAVL1,CREB3L2
GO:BP	regulation of biological quality	GO:0065008	5.2091e-06	5.28323	3726	259	85	21092	APP,PTPN11,DLD,PRKN,CDKL5,DCTN1,F8,LRP8,GATM,SCN1A,SMAD3,PAPSS2,TWNK,TCF7L2,CNTN4,GRM1,KCNK9,CTNNB1,DLG3,SLC1A3,INHA,SLC9A6,ROBO2,KMT2A,ABL2,DNAJB2,SSH1,CACNB3,DAB2,CACNG2,KLHL3,NR1D1,ABCA5,FMN1,ARHGAP35,GRIA1,L3MBTL3,ARID2,SIN3A,TFE3,NRXN3,MAP2K6,ETS1,RIMS2,STXBP1,TPP2,GPC6,CLIC4,AAK1,NBEA,USP9X,WNK3,NEB,NLGN1,ATP1A1,REST,EFNA5,SEMA5A,PLXNA4,CPEB3,USP2,NTRK3,EPHA7,SLC22A17,HSD17B4,RB1,DISP1,BMPR…
GO:BP	cell projection morphogenesis	GO:0048858	5.445e-06	5.264	652	259	29	21092	CNTNAP2,APP,PTPN11,PRKN,CDKL5,LRP8,CNTN4,CTNNB1,SLC9A6,ROBO2,ALCAM,ARHGAP35,PREX2,PLXNC1,COBL,SIN3A,NRXN3,RIMS2,STXBP1,VSTM2L,USP9X,NLGN1,EFNA5,SEMA5A,PLXNA4,EPHA7,BMPR1B,BMPR2,RERE
GO:BP	transcription by RNA polymerase II	GO:0006366	5.5252e-06	5.25765	2676	259	68	21092	APP,PRKN,SOX2,SMAD3,TRPS1,TCF7L2,CTNNB1,NCOA3,POLR2A,KMT2A,KMT2D,ARRB1,TIAL1,HNRNPK,HSF2,DDX17,CDON,DAB2,SALL3,SRA1,SMARCA2,NR1D1,KDM2B,HDAC1,ZNF772,ARID2,SIN3A,HES5,NFIA,ZBTB18,TFE3,INTS2,ETS1,TCF4,DLX6,PKIA,GATAD2B,ZNF564,TCF20,USP9X,ZNF225,REST,CPEB3,USP2,ZFP90,ZNF234,ZNF283,CHD1,ATAD2,RB1,BMPR1B,BMPR2,ZBTB16,MBTPS2,APBB2,WWC1,NR2F2,NUCKS1,RARA,HIF1A,HIVEP3,ARID5B,MYRF,SPEN,GADD45A,INSM1,MYT1,…
GO:BP	cell morphogenesis involved in neuron differentiation	GO:0048667	5.9195e-06	5.22772	573	259	27	21092	APP,PTPN11,CDKL5,LRP8,CNTN4,SLC1A3,SLC9A6,ROBO2,ALCAM,ARHGAP35,PREX2,PLXNC1,COBL,SIN3A,NRXN3,STXBP1,VSTM2L,USP9X,NLGN1,EFNA5,SEMA5A,PLXNA4,EPHA7,RB1,BMPR1B,BMPR2,RERE
GO:BP	positive regulation of nucleobase-containing compound metabolic process	GO:0045935	6.3508e-06	5.19717	2048	259	57	21092	APP,PRKN,SOX2,SMAD3,TCF7L2,CTNNB1,NCOA3,KMT2A,KMT2D,ARRB1,HNRNPK,HSF2,DDX17,CDON,XRCC5,DAB2,SRA1,SMARCA2,SF3B4,NR1D1,FMN2,HDAC1,ARID2,SIN3A,HES5,NFIA,ZBTB18,TFE3,ETS1,TCF4,GATAD2B,BABAM2,TCF20,USP9X,ZNF225,SLF2,REST,CPEB3,ZFP90,ATAD2,RB1,BMPR1B,BMPR2,ZBTB16,MBTPS2,APBB2,WWC1,NR2F2,NUCKS1,RARA,HIF1A,HIVEP3,ARID5B,RNF20,RERE,MYRF,CREB3L2
GO:BP	positive regulation of cell differentiation	GO:0045597	7.0459e-06	5.15206	877	259	34	21092	CDKL5,SOX2,LRP8,SMAD3,TCF7L2,CTNNB1,PTCH2,NCOA3,ROBO2,CDON,XRCC5,DAB2,SMARCA2,HDAC1,PLXNC1,ARID2,SIN3A,TFE3,ETS1,TCF4,REST,EFNA5,SEMA5A,PLXNA4,RB1,BMPR1B,BMPR2,ZBTB16,ATP11C,RARA,HIF1A,SPEN,TENM4,INSM1
GO:BP	regulation of transcription by RNA polymerase II	GO:0006357	7.1838e-06	5.14364	2574	259	66	21092	APP,PRKN,SOX2,SMAD3,TRPS1,TCF7L2,CTNNB1,NCOA3,KMT2A,KMT2D,ARRB1,TIAL1,HNRNPK,HSF2,DDX17,CDON,DAB2,SALL3,SRA1,SMARCA2,NR1D1,KDM2B,HDAC1,ZNF772,ARID2,SIN3A,HES5,NFIA,ZBTB18,TFE3,ETS1,TCF4,DLX6,PKIA,GATAD2B,ZNF564,TCF20,USP9X,ZNF225,REST,CPEB3,USP2,ZFP90,ZNF234,ZNF283,CHD1,ATAD2,RB1,BMPR1B,BMPR2,ZBTB16,MBTPS2,APBB2,WWC1,NR2F2,NUCKS1,RARA,HIF1A,HIVEP3,ARID5B,MYRF,SPEN,GADD45A,INSM1,MYT1,CREB3L2
GO:BP	negative regulation of cellular process	GO:0048523	7.5128e-06	5.1242	4749	259	100	21092	APP,PTPN11,PRKAG2,PRKN,SOX2,UBQLN1,CSNK2A1,SMAD3,TRPS1,TCF7L2,CNTN4,CTNNB1,PTCH2,DLG3,HUWE1,INHA,PDS5B,SF1,ROBO2,KMT2A,ARRB1,ABL2,TIAL1,DNAJB2,HNRNPK,ERLEC1,XRCC5,SSH1,DAB2,RBM5,SRA1,CRADD,SMARCA2,NR1D1,KDM2B,MAP2K4,PPP1R9B,ABCA5,FMN2,PTRH2,HERC1,ARHGAP35,HDAC1,CLTC,GRIA1,PLXNC1,L3MBTL3,ARID2,MAP4,SIN3A,HES5,ZBTB18,ETS1,CTSC,STXBP1,SPON1,PKIA,CLIC4,OTUD6B,GATAD2B,HOOK3,VSTM2L,BABAM2,INVS,USP9X,WN…
GO:BP	cell morphogenesis	GO:0000902	1.0323e-05	4.9862	1030	259	37	21092	CNTNAP2,APP,PTPN11,PRKN,CDKL5,LRP8,CNTN4,CTNNB1,SLC1A3,SLC9A6,ROBO2,ALCAM,SSH1,DAB2,ARHGAP35,PREX2,PLXNC1,COBL,SIN3A,NRXN3,RIMS2,STXBP1,CLIC4,VSTM2L,USP9X,NLGN1,CDH24,EFNA5,SEMA5A,PLXNA4,EPHA7,RHOBTB1,RB1,BMPR1B,BMPR2,RERE,RHOU
GO:BP	cell part morphogenesis	GO:0032990	1.0384e-05	4.98363	671	259	29	21092	CNTNAP2,APP,PTPN11,PRKN,CDKL5,LRP8,CNTN4,CTNNB1,SLC9A6,ROBO2,ALCAM,ARHGAP35,PREX2,PLXNC1,COBL,SIN3A,NRXN3,RIMS2,STXBP1,VSTM2L,USP9X,NLGN1,EFNA5,SEMA5A,PLXNA4,EPHA7,BMPR1B,BMPR2,RERE
GO:BP	regulation of neurogenesis	GO:0050767	1.5697e-05	4.80418	370	259	21	21092	CDKL5,LRP8,CTNNB1,ROBO2,XRCC5,NR1D1,HDAC1,PLXNC1,HES5,HOOK3,REST,EFNA5,SEMA5A,PLXNA4,NTRK3,EPHA7,RB1,BMPR2,HIF1A,SPEN,TENM4
GO:BP	developmental growth	GO:0048589	1.8361e-05	4.73611	646	259	28	21092	APP,PTPN11,PRKN,CDKL5,SOX2,SMAD3,CTNNB1,SLC9A6,RAD51B,KMT2D,ALCAM,FMN1,COBL,ARID2,SIN3A,RIMS2,CLIC4,USP9X,EFNA5,SEMA5A,PLXNA4,EPHA7,BMPR1B,BMPR2,WWC1,RARA,ARID5B,TENM4
GO:BP	cell morphogenesis involved in differentiation	GO:0000904	1.9195e-05	4.7168	733	259	30	21092	APP,PTPN11,CDKL5,LRP8,CNTN4,CTNNB1,SLC1A3,SLC9A6,ROBO2,ALCAM,DAB2,ARHGAP35,PREX2,PLXNC1,COBL,SIN3A,NRXN3,STXBP1,CLIC4,VSTM2L,USP9X,NLGN1,EFNA5,SEMA5A,PLXNA4,EPHA7,RB1,BMPR1B,BMPR2,RERE
GO:BP	central nervous system development	GO:0007417	2.4969e-05	4.6026	1065	259	37	21092	CNTNAP2,APP,PTPN11,PRKN,DCTN1,SOX2,LRP8,CNTN4,CTNNB1,PTCHD1,ROBO2,CDON,XRCC5,NR1D1,KDM2B,PPP1R9B,HERC1,ARHGAP35,HDAC1,SIN3A,HES5,HOOK3,PCDH19,ADGRL3,SEMA5A,PLXNA4,NTRK3,EPHA7,BMPR1B,ZBTB16,NR2F2,RARA,HIF1A,RERE,MYRF,TENM4,SLC17A7
GO:BP	regulation of biological process	GO:0050789	2.6437e-05	4.57778	12361	259	195	21092	CNTNAP2,APP,PTPN11,PRKAG2,DLD,PRKN,CDKL5,DCTN1,SOX2,LRP8,UBQLN1,GATM,SCN1A,CSNK2A1,SMAD3,PPP2R1B,TRPS1,AMELX,TCF7L2,CNTN4,GRM1,CTNNB1,PTCH2,DLG3,SLC1A3,HUWE1,NCOA3,INHA,MOSPD2,SLC9A6,PTCHD1,PDS5B,SF1,RAD51B,FBXO33,ROBO2,KMT2A,KMT2D,ARHGEF12,ARRB1,ABL2,CKS1B,TIAL1,DST,DNAJB2,HNRNPK,HSF2,DDX17,ALCAM,ERLEC1,CDON,XRCC5,SSH1,CACNB3,DAB2,AFF4,SALL3,RBM5,SRA1,CACNG2,CRADD,SMARCA2,SF3B4,PLCB4,NR1D1,KDM2B…
GO:BP	regulation of primary metabolic process	GO:0080090	3.4501e-05	4.46217	5869	259	114	21092	APP,PTPN11,PRKAG2,PRKN,SOX2,LRP8,UBQLN1,CSNK2A1,SMAD3,TRPS1,TCF7L2,CTNNB1,DLG3,HUWE1,NCOA3,INHA,SF1,FBXO33,KMT2A,KMT2D,ARRB1,CKS1B,TIAL1,DNAJB2,HNRNPK,HSF2,DDX17,CDON,XRCC5,DAB2,SALL3,RBM5,SRA1,CRADD,SMARCA2,SF3B4,NR1D1,KDM2B,PPP1R9B,FMN2,HDAC1,CLTC,THBS4,ZNF772,L3MBTL3,ARID2,AFF3,SIN3A,RPS4X,HES5,NFIA,ZBTB18,TFE3,INTS2,MAP2K6,ETS1,TCF4,CTSC,CCNG2,DLX6,SPON1,RALBP1,PKIA,DAZAP2,OTUD6B,GATAD2B,ZNF5…
GO:BP	positive regulation of cellular biosynthetic process	GO:0031328	3.4893e-05	4.45727	2033	259	55	21092	APP,PRKN,SOX2,SMAD3,TCF7L2,CTNNB1,NCOA3,KMT2A,KMT2D,ARRB1,HNRNPK,HSF2,DDX17,CDON,XRCC5,DAB2,SRA1,SMARCA2,NR1D1,HDAC1,SIN3A,RPS4X,HES5,NFIA,ZBTB18,TFE3,ETS1,TCF4,OTUD6B,GATAD2B,TCF20,ZNF225,LPGAT1,REST,CPEB3,ZFP90,ATAD2,RB1,BMPR1B,BMPR2,ZBTB16,MBTPS2,APBB2,WWC1,NR2F2,NUCKS1,RARA,HIF1A,HIVEP3,ARID5B,RNF20,RERE,MYRF,ELAVL1,CREB3L2
GO:BP	positive regulation of nucleic acid-templated transcription	GO:1903508	3.7364e-05	4.42754	1703	259	49	21092	APP,PRKN,SOX2,SMAD3,TCF7L2,CTNNB1,NCOA3,KMT2A,KMT2D,ARRB1,HNRNPK,HSF2,DDX17,CDON,DAB2,SRA1,SMARCA2,NR1D1,HDAC1,SIN3A,HES5,NFIA,ZBTB18,TFE3,ETS1,TCF4,GATAD2B,TCF20,ZNF225,REST,ZFP90,ATAD2,RB1,BMPR1B,BMPR2,ZBTB16,MBTPS2,APBB2,WWC1,NR2F2,NUCKS1,RARA,HIF1A,HIVEP3,ARID5B,RNF20,RERE,MYRF,CREB3L2
GO:BP	positive regulation of DNA-templated transcription	GO:0045893	3.7364e-05	4.42754	1703	259	49	21092	APP,PRKN,SOX2,SMAD3,TCF7L2,CTNNB1,NCOA3,KMT2A,KMT2D,ARRB1,HNRNPK,HSF2,DDX17,CDON,DAB2,SRA1,SMARCA2,NR1D1,HDAC1,SIN3A,HES5,NFIA,ZBTB18,TFE3,ETS1,TCF4,GATAD2B,TCF20,ZNF225,REST,ZFP90,ATAD2,RB1,BMPR1B,BMPR2,ZBTB16,MBTPS2,APBB2,WWC1,NR2F2,NUCKS1,RARA,HIF1A,HIVEP3,ARID5B,RNF20,RERE,MYRF,CREB3L2
GO:BP	developmental cell growth	GO:0048588	3.8436e-05	4.41527	222	259	16	21092	APP,PRKN,CDKL5,CTNNB1,SLC9A6,KMT2D,ALCAM,COBL,SIN3A,RIMS2,USP9X,EFNA5,SEMA5A,PLXNA4,EPHA7,BMPR2
GO:BP	positive regulation of developmental process	GO:0051094	4.1467e-05	4.3823	1337	259	42	21092	PRKN,CDKL5,SOX2,LRP8,SMAD3,AMELX,TCF7L2,CTNNB1,PTCH2,NCOA3,ROBO2,CDON,XRCC5,DAB2,SMARCA2,KDM2B,HDAC1,PLXNC1,COBL,ARID2,SIN3A,TFE3,ETS1,TCF4,RIMS2,RALBP1,NLGN1,REST,EFNA5,SEMA5A,PLXNA4,CPEB3,RB1,BMPR1B,BMPR2,ZBTB16,ATP11C,RARA,HIF1A,SPEN,TENM4,INSM1
GO:BP	positive regulation of RNA biosynthetic process	GO:1902680	4.1776e-05	4.37907	1709	259	49	21092	APP,PRKN,SOX2,SMAD3,TCF7L2,CTNNB1,NCOA3,KMT2A,KMT2D,ARRB1,HNRNPK,HSF2,DDX17,CDON,DAB2,SRA1,SMARCA2,NR1D1,HDAC1,SIN3A,HES5,NFIA,ZBTB18,TFE3,ETS1,TCF4,GATAD2B,TCF20,ZNF225,REST,ZFP90,ATAD2,RB1,BMPR1B,BMPR2,ZBTB16,MBTPS2,APBB2,WWC1,NR2F2,NUCKS1,RARA,HIF1A,HIVEP3,ARID5B,RNF20,RERE,MYRF,CREB3L2
GO:BP	regulation of signaling	GO:0023051	4.2333e-05	4.37332	3374	259	77	21092	APP,PTPN11,PRKN,SOX2,LRP8,UBQLN1,CSNK2A1,SMAD3,PPP2R1B,TCF7L2,CNTN4,GRM1,CTNNB1,PTCH2,SLC1A3,NCOA3,INHA,SLC9A6,ROBO2,KMT2A,KMT2D,ARHGEF12,ARRB1,ABL2,TIAL1,HNRNPK,CDON,DAB2,CACNG2,CRADD,PLCB4,NR1D1,POGLUT1,PPP1R9B,ARHGAP35,HDAC1,PREX2,GRIA1,ARHGAP29,SIN3A,HES5,GPR137C,NRXN3,MAP2K6,RIMS2,CTSC,STXBP1,GPC6,RALBP1,AAK1,BABAM2,INVS,USP9X,NLGN1,REST,EFNA5,SEMA5A,CPEB3,USP2,NTRK3,RALGAPA2,EPHA7,RB1,BMPR1…
GO:BP	cell projection organization	GO:0030030	4.4237e-05	4.35421	1550	259	46	21092	CNTNAP2,APP,PTPN11,PRKN,CDKL5,DCTN1,LRP8,CNTN4,CTNNB1,SLC9A6,ROBO2,ABL2,ALCAM,DAB2,CEP164,PPP1R9B,HERC1,ARHGAP35,PREX2,PLXNC1,COBL,MAP4,SIN3A,HES5,NRXN3,RIMS2,STXBP1,VSTM2L,USP9X,NLGN1,EFNA5,SEMA5A,PLXNA4,CFAP70,CPEB3,NTRK3,EPHA7,RB1,BMPR1B,BMPR2,SNAP25,RERE,RHOU,DNAAF4,CREB3L2,TNC
GO:BP	positive regulation of transcription by RNA polymerase II	GO:0045944	4.9486e-05	4.30551	1243	259	40	21092	APP,PRKN,SOX2,SMAD3,TCF7L2,CTNNB1,NCOA3,KMT2A,KMT2D,ARRB1,HNRNPK,HSF2,DDX17,CDON,DAB2,SMARCA2,NR1D1,HDAC1,SIN3A,HES5,NFIA,ZBTB18,TFE3,ETS1,TCF4,TCF20,ZNF225,REST,ATAD2,RB1,BMPR1B,BMPR2,ZBTB16,MBTPS2,APBB2,NR2F2,NUCKS1,RARA,HIF1A,CREB3L2
GO:BP	plasma membrane bounded cell projection organization	GO:0120036	5.6282e-05	4.24963	1509	259	45	21092	CNTNAP2,APP,PTPN11,PRKN,CDKL5,DCTN1,LRP8,CNTN4,CTNNB1,SLC9A6,ROBO2,ABL2,ALCAM,DAB2,CEP164,PPP1R9B,HERC1,ARHGAP35,PREX2,PLXNC1,COBL,MAP4,SIN3A,HES5,NRXN3,RIMS2,STXBP1,VSTM2L,USP9X,NLGN1,EFNA5,SEMA5A,PLXNA4,CFAP70,CPEB3,NTRK3,EPHA7,RB1,BMPR1B,BMPR2,SNAP25,RERE,DNAAF4,CREB3L2,TNC
GO:BP	positive regulation of RNA metabolic process	GO:0051254	6.2823e-05	4.20188	1842	259	51	21092	APP,PRKN,SOX2,SMAD3,TCF7L2,CTNNB1,NCOA3,KMT2A,KMT2D,ARRB1,HNRNPK,HSF2,DDX17,CDON,DAB2,SRA1,SMARCA2,SF3B4,NR1D1,HDAC1,SIN3A,HES5,NFIA,ZBTB18,TFE3,ETS1,TCF4,GATAD2B,TCF20,ZNF225,REST,CPEB3,ZFP90,ATAD2,RB1,BMPR1B,BMPR2,ZBTB16,MBTPS2,APBB2,WWC1,NR2F2,NUCKS1,RARA,HIF1A,HIVEP3,ARID5B,RNF20,RERE,MYRF,CREB3L2
GO:BP	regulation of cellular metabolic process	GO:0031323	6.8186e-05	4.1663	5649	259	110	21092	APP,PTPN11,PRKAG2,PRKN,SOX2,LRP8,UBQLN1,CSNK2A1,SMAD3,TRPS1,TCF7L2,CTNNB1,DLG3,NCOA3,INHA,SF1,KMT2A,KMT2D,ARRB1,ABL2,CKS1B,TIAL1,DNAJB2,HNRNPK,HSF2,DDX17,CDON,XRCC5,DAB2,SALL3,RBM5,SRA1,SMARCA2,SF3B4,NR1D1,KDM2B,PPP1R9B,FMN2,HERC1,HDAC1,THBS4,ZNF772,L3MBTL3,ARID2,AFF3,SIN3A,RPS4X,HES5,NFIA,ZBTB18,TFE3,INTS2,MAP2K6,ETS1,TCF4,CCNG2,DLX6,SPON1,RALBP1,PKIA,DAZAP2,OTUD6B,GATAD2B,ZNF564,BABAM2,CLK1,TCF…
GO:BP	head development	GO:0060322	8.2584e-05	4.0831	828	259	31	21092	CNTNAP2,APP,PTPN11,SOX2,LRP8,CNTN4,CTNNB1,PTCHD1,ROBO2,CDON,XRCC5,KDM2B,PPP1R9B,HERC1,ARHGAP35,HDAC1,SIN3A,HES5,DLX6,HOOK3,PCDH19,ADGRL3,SEMA5A,PLXNA4,EPHA7,NR2F2,RARA,HIF1A,ARID5B,RERE,SLC17A7
GO:BP	organic cyclic compound biosynthetic process	GO:1901362	8.2722e-05	4.08238	4280	259	90	21092	APP,PRKAG2,DLD,PRKN,SOX2,LRP8,SMAD3,IMPDH2,PAPSS2,TRPS1,TWNK,TCF7L2,CTNNB1,NCOA3,SF1,POLR2A,KMT2A,KMT2D,ARRB1,CKS1B,TIAL1,HNRNPK,HSF2,DDX17,CDON,XRCC5,DAB2,SALL3,GTF3C3,SRA1,SMARCA2,NDUFA12,NR1D1,KDM2B,NADK2,HDAC1,ZNF772,L3MBTL3,ARID2,AFF3,SIN3A,HES5,NFIA,ZBTB18,TFE3,POLA1,INTS2,ETS1,TCF4,DLX6,PKIA,GATAD2B,ZNF564,TCF20,USP9X,ZNF225,ATP1A1,REST,CPEB3,USP2,ZFP90,ZNF234,ZNF283,CHD1,ATAD2,RB1,BMPR1B,…
GO:BP	regulation of cell communication	GO:0010646	8.352e-05	4.07821	3363	259	76	21092	APP,PTPN11,PRKN,SOX2,LRP8,UBQLN1,CSNK2A1,SMAD3,PPP2R1B,TCF7L2,CNTN4,GRM1,CTNNB1,PTCH2,SLC1A3,NCOA3,INHA,SLC9A6,ROBO2,KMT2A,KMT2D,ARHGEF12,ARRB1,ABL2,TIAL1,HNRNPK,CDON,DAB2,CACNG2,CRADD,PLCB4,NR1D1,POGLUT1,PPP1R9B,ARHGAP35,HDAC1,PREX2,GRIA1,ARHGAP29,SIN3A,HES5,GPR137C,NRXN3,MAP2K6,RIMS2,CTSC,STXBP1,GPC6,RALBP1,AAK1,BABAM2,INVS,USP9X,NLGN1,REST,EFNA5,SEMA5A,CPEB3,USP2,NTRK3,RALGAPA2,EPHA7,RB1,BMPR1…
GO:BP	developmental growth involved in morphogenesis	GO:0060560	9.6279e-05	4.01647	237	259	16	21092	APP,PRKN,CDKL5,CTNNB1,SLC9A6,ALCAM,FMN1,COBL,SIN3A,RIMS2,USP9X,EFNA5,SEMA5A,PLXNA4,EPHA7,BMPR2
GO:BP	regulation of nitrogen compound metabolic process	GO:0051171	0.00012108	3.91694	5706	259	110	21092	APP,PTPN11,PRKAG2,PRKN,SOX2,LRP8,UBQLN1,CSNK2A1,SMAD3,TRPS1,TCF7L2,CTNNB1,DLG3,HUWE1,NCOA3,INHA,SF1,FBXO33,KMT2A,KMT2D,ARRB1,CKS1B,TIAL1,DNAJB2,HNRNPK,HSF2,DDX17,CDON,XRCC5,DAB2,SALL3,RBM5,SRA1,CRADD,SMARCA2,SF3B4,NR1D1,KDM2B,PPP1R9B,FMN2,HDAC1,CLTC,THBS4,ZNF772,L3MBTL3,ARID2,AFF3,SIN3A,RPS4X,HES5,NFIA,ZBTB18,TFE3,INTS2,MAP2K6,ETS1,TCF4,CTSC,CCNG2,DLX6,SPON1,RALBP1,PKIA,DAZAP2,OTUD6B,GATAD2B,ZNF5…
GO:BP	nucleobase-containing compound biosynthetic process	GO:0034654	0.00012576	3.90047	4049	259	86	21092	APP,PRKAG2,DLD,PRKN,SOX2,LRP8,SMAD3,IMPDH2,PAPSS2,TRPS1,TWNK,TCF7L2,CTNNB1,NCOA3,SF1,POLR2A,KMT2A,KMT2D,ARRB1,CKS1B,TIAL1,HNRNPK,HSF2,DDX17,CDON,XRCC5,DAB2,SALL3,GTF3C3,SRA1,SMARCA2,NDUFA12,NR1D1,KDM2B,NADK2,HDAC1,ZNF772,L3MBTL3,ARID2,AFF3,SIN3A,HES5,NFIA,ZBTB18,TFE3,POLA1,INTS2,ETS1,TCF4,DLX6,PKIA,GATAD2B,ZNF564,TCF20,USP9X,ZNF225,REST,CPEB3,USP2,ZFP90,ZNF234,ZNF283,CHD1,ATAD2,RB1,BMPR1B,BMPR2,Z…
GO:BP	regulation of multicellular organismal development	GO:2000026	0.00013399	3.87294	1394	259	42	21092	PTPN11,CDKL5,LRP8,SMAD3,TRPS1,AMELX,CTNNB1,PTCH2,NCOA3,INHA,ROBO2,XRCC5,SMARCA2,NR1D1,POGLUT1,HDAC1,THBS4,PLXNC1,ARID2,HES5,TFE3,ETS1,CTSC,HOOK3,NLGN1,REST,EFNA5,SEMA5A,PLXNA4,NTRK3,EPHA7,RB1,BMPR1B,BMPR2,ZBTB16,ATP11C,RARA,HIF1A,MYRF,SPEN,TENM4,GADD45A
GO:BP	regulation of cellular component organization	GO:0051128	0.0001457	3.83654	2355	259	59	21092	CNTNAP2,APP,PTPN11,PRKN,CDKL5,DCTN1,LRP8,CSNK2A1,SMAD3,CTNNB1,PTCH2,HUWE1,ROBO2,ARRB1,ABL2,DNAJB2,HNRNPK,XRCC5,SSH1,DAB2,SMARCA2,KDM2B,PPP1R9B,FMN1,ARHGAP35,CLTC,PLXNC1,COBL,L3MBTL3,ARID2,MAP4,SIN3A,RIMS2,STXBP1,GPC6,RALBP1,CLIC4,AAK1,TMEM135,LSM11,NEB,NLGN1,SLF2,EFNA5,SEMA5A,PLXNA4,NTRK3,EPHA7,RHOBTB1,RB1,BMPR2,HIF1A,SNAP25,IGFBP7,SVIL,INSM1,SLC17A7,CREB3L2,TNC
GO:BP	aromatic compound biosynthetic process	GO:0019438	0.00015318	3.8148	4133	259	87	21092	APP,PRKAG2,DLD,PRKN,SOX2,LRP8,SMAD3,IMPDH2,PAPSS2,TRPS1,TWNK,TCF7L2,CTNNB1,NCOA3,SF1,POLR2A,KMT2A,KMT2D,ARRB1,CKS1B,TIAL1,HNRNPK,HSF2,DDX17,CDON,XRCC5,DAB2,SALL3,GTF3C3,SRA1,SMARCA2,NDUFA12,NR1D1,KDM2B,NADK2,HDAC1,ZNF772,L3MBTL3,ARID2,AFF3,SIN3A,HES5,NFIA,ZBTB18,TFE3,POLA1,INTS2,ETS1,TCF4,DLX6,PKIA,GATAD2B,ZNF564,TCF20,USP9X,ZNF225,REST,CPEB3,USP2,ZFP90,ZNF234,ZNF283,CHD1,ATAD2,RB1,BMPR1B,BMPR2,Z…
GO:BP	RNA biosynthetic process	GO:0032774	0.00017249	3.76324	3615	259	79	21092	APP,PRKN,SOX2,LRP8,SMAD3,TRPS1,TWNK,TCF7L2,CTNNB1,NCOA3,SF1,POLR2A,KMT2A,KMT2D,ARRB1,CKS1B,TIAL1,HNRNPK,HSF2,DDX17,CDON,XRCC5,DAB2,SALL3,GTF3C3,SRA1,SMARCA2,NR1D1,KDM2B,HDAC1,ZNF772,L3MBTL3,ARID2,AFF3,SIN3A,HES5,NFIA,ZBTB18,TFE3,POLA1,INTS2,ETS1,TCF4,DLX6,PKIA,GATAD2B,ZNF564,TCF20,USP9X,ZNF225,REST,CPEB3,USP2,ZFP90,ZNF234,ZNF283,CHD1,ATAD2,RB1,BMPR1B,BMPR2,ZBTB16,MBTPS2,APBB2,WWC1,NR2F2,NUCKS1,RA…
GO:BP	behavior	GO:0007610	0.00021359	3.67043	637	259	26	21092	CNTNAP2,APP,PRKN,DCTN1,GATM,SCN1A,GRM1,SLC1A3,PTCHD1,KMT2A,ABL2,NR1D1,PPP1R9B,PREX2,GRIA1,THBS4,NRXN3,NLGN1,CPEB3,USP2,HIF1A,SNAP25,CLCN3,CCND2,ARRDC3,DNAAF4
GO:BP	forebrain development	GO:0030900	0.00022823	3.64163	394	259	20	21092	CNTNAP2,APP,SOX2,LRP8,CTNNB1,PTCHD1,ROBO2,CDON,KDM2B,PPP1R9B,ARHGAP35,HDAC1,SIN3A,HES5,HOOK3,SEMA5A,PLXNA4,NR2F2,RARA,HIF1A
GO:BP	synapse organization	GO:0050808	0.00023354	3.63164	433	259	21	21092	APP,CDKL5,DCTN1,LRP8,CTNNB1,SLC9A6,ROBO2,CACNB3,CACNG2,NFIA,NRXN3,GPC6,NLGN1,ADGRL3,REST,EFNA5,NTRK3,EPHA7,APBB2,GABRB2,TNC
GO:BP	protein modification process	GO:0036211	0.00025853	3.58748	3649	259	79	21092	APP,PTPN11,PRKAG2,DLD,PRKN,CDKL5,LRP8,UBQLN1,GALNT2,CSNK2A1,PPP2R1B,CTNNB1,DLG3,HUWE1,NCOA3,INHA,FBXO33,KMT2A,KMT2D,ARRB1,ABL2,CKS1B,DNAJB2,CDON,XRCC5,SSH1,DAB2,KLHL3,KDM2B,MAP2K4,POGLUT1,STT3B,PPP1R9B,HERC1,HDAC1,THBS4,SIN3A,HES5,EGFLAM,ZDHHC20,MAP2K6,TPP2,CCNG2,RALBP1,PKIA,DAZAP2,AAK1,TTLL5,OTUD6B,UBE2W,ABHD10,GATAD2B,BABAM2,CLK1,USP9X,WNK3,LMTK3,SLF2,REST,EFNA5,USP2,NTRK3,EPHA7,GAN,RB1,BMPR1B,…
GO:BP	brain development	GO:0007420	0.00027339	3.56322	780	259	29	21092	CNTNAP2,APP,PTPN11,SOX2,LRP8,CNTN4,CTNNB1,PTCHD1,ROBO2,CDON,XRCC5,KDM2B,PPP1R9B,HERC1,ARHGAP35,HDAC1,SIN3A,HES5,HOOK3,PCDH19,ADGRL3,SEMA5A,PLXNA4,EPHA7,NR2F2,RARA,HIF1A,RERE,SLC17A7
GO:BP	cell population proliferation	GO:0008283	0.00028032	3.55235	1988	259	52	21092	CNTNAP2,APP,SOX2,CSNK2A1,SMAD3,IMPDH2,AMELX,TCF7L2,CTNNB1,DLG3,INHA,PDS5B,SF1,RAD51B,KMT2A,KMT2D,CKS1B,TIAL1,DNAJB2,CDON,XRCC5,DAB2,RBM5,SMARCA2,NR1D1,KDM2B,PPP1R9B,HDAC1,THBS4,ARID2,RPS4X,HES5,ETS1,DLX6,OTUD6B,HOOK3,REST,SEMA5A,NTRK3,RB1,BMPR1B,BMPR2,ZBTB16,NR2F2,RARA,HIF1A,IGFBP7,CCND2,RERE,TENM4,INSM1,TNC
GO:BP	heterocycle biosynthetic process	GO:0018130	0.00028717	3.54187	4122	259	86	21092	APP,PRKAG2,DLD,PRKN,SOX2,LRP8,SMAD3,IMPDH2,PAPSS2,TRPS1,TWNK,TCF7L2,CTNNB1,NCOA3,SF1,POLR2A,KMT2A,KMT2D,ARRB1,CKS1B,TIAL1,HNRNPK,HSF2,DDX17,CDON,XRCC5,DAB2,SALL3,GTF3C3,SRA1,SMARCA2,NDUFA12,NR1D1,KDM2B,NADK2,HDAC1,ZNF772,L3MBTL3,ARID2,AFF3,SIN3A,HES5,NFIA,ZBTB18,TFE3,POLA1,INTS2,ETS1,TCF4,DLX6,PKIA,GATAD2B,ZNF564,TCF20,USP9X,ZNF225,REST,CPEB3,USP2,ZFP90,ZNF234,ZNF283,CHD1,ATAD2,RB1,BMPR1B,BMPR2,Z…
GO:BP	biosynthetic process	GO:0009058	0.00029286	3.53333	5941	259	112	21092	APP,PRKAG2,DLD,PRKN,SOX2,LRP8,GATM,GALNT2,SMAD3,IMPDH2,PAPSS2,TRPS1,AMELX,TWNK,TCF7L2,CTNNB1,SLC1A3,NCOA3,INHA,SF1,POLR2A,KMT2A,KMT2D,ARRB1,CKS1B,TIAL1,HNRNPK,HSF2,DDX17,CDON,XRCC5,DAB2,SALL3,GTF3C3,SRA1,SMARCA2,NDUFA12,NR1D1,KDM2B,POGLUT1,STT3B,NADK2,HDAC1,CLTC,ZNF772,PPIP5K2,L3MBTL3,ARID2,AFF3,SIN3A,RPS4X,HES5,NFIA,ZBTB18,TFE3,ZDHHC20,POLA1,INTS2,MAP2K6,ETS1,TCF4,DLX6,PKIA,GCAT,OTUD6B,GATAD2B,M…
GO:BP	DNA-templated transcription	GO:0006351	0.00029548	3.52947	3595	259	78	21092	APP,PRKN,SOX2,LRP8,SMAD3,TRPS1,TWNK,TCF7L2,CTNNB1,NCOA3,SF1,POLR2A,KMT2A,KMT2D,ARRB1,CKS1B,TIAL1,HNRNPK,HSF2,DDX17,CDON,XRCC5,DAB2,SALL3,GTF3C3,SRA1,SMARCA2,NR1D1,KDM2B,HDAC1,ZNF772,L3MBTL3,ARID2,AFF3,SIN3A,HES5,NFIA,ZBTB18,TFE3,INTS2,ETS1,TCF4,DLX6,PKIA,GATAD2B,ZNF564,TCF20,USP9X,ZNF225,REST,CPEB3,USP2,ZFP90,ZNF234,ZNF283,CHD1,ATAD2,RB1,BMPR1B,BMPR2,ZBTB16,MBTPS2,APBB2,WWC1,NR2F2,NUCKS1,RARA,HIF…
GO:BP	nucleic acid-templated transcription	GO:0097659	0.000299	3.52433	3596	259	78	21092	APP,PRKN,SOX2,LRP8,SMAD3,TRPS1,TWNK,TCF7L2,CTNNB1,NCOA3,SF1,POLR2A,KMT2A,KMT2D,ARRB1,CKS1B,TIAL1,HNRNPK,HSF2,DDX17,CDON,XRCC5,DAB2,SALL3,GTF3C3,SRA1,SMARCA2,NR1D1,KDM2B,HDAC1,ZNF772,L3MBTL3,ARID2,AFF3,SIN3A,HES5,NFIA,ZBTB18,TFE3,INTS2,ETS1,TCF4,DLX6,PKIA,GATAD2B,ZNF564,TCF20,USP9X,ZNF225,REST,CPEB3,USP2,ZFP90,ZNF234,ZNF283,CHD1,ATAD2,RB1,BMPR1B,BMPR2,ZBTB16,MBTPS2,APBB2,WWC1,NR2F2,NUCKS1,RARA,HIF…
GO:BP	axonogenesis	GO:0007409	0.00032941	3.48227	442	259	21	21092	APP,PTPN11,CDKL5,CNTN4,SLC9A6,ROBO2,ALCAM,ARHGAP35,PLXNC1,COBL,SIN3A,NRXN3,STXBP1,VSTM2L,USP9X,EFNA5,SEMA5A,PLXNA4,EPHA7,BMPR1B,BMPR2
GO:BP	negative regulation of developmental process	GO:0051093	0.00032961	3.48199	929	259	32	21092	APP,PTPN11,PRKN,SOX2,SMAD3,CNTN4,CTNNB1,HUWE1,INHA,ROBO2,SRA1,SMARCA2,NR1D1,ABCA5,HDAC1,THBS4,SIN3A,HES5,HOOK3,NLGN1,REST,EFNA5,SEMA5A,NTRK3,EPHA7,RB1,BMPR2,ZBTB16,WWC1,RARA,HIF1A,GADD45A
GO:BP	positive regulation of protein metabolic process	GO:0051247	0.00039407	3.40443	1504	259	43	21092	APP,PTPN11,PRKAG2,PRKN,LRP8,UBQLN1,CSNK2A1,SMAD3,TCF7L2,CTNNB1,DLG3,HUWE1,INHA,FBXO33,KMT2A,ARRB1,CKS1B,DNAJB2,CDON,XRCC5,DAB2,CRADD,THBS4,RPS4X,HES5,MAP2K6,CTSC,SPON1,RALBP1,DAZAP2,OTUD6B,WNK3,REST,EFNA5,CPEB3,NTRK3,EPHA7,BMPR1B,BMPR2,CCND2,RNF20,ARRDC3,ELAVL1
GO:BP	axon development	GO:0061564	0.00043735	3.35917	490	259	22	21092	APP,PTPN11,CDKL5,CNTN4,SLC9A6,ROBO2,ALCAM,ARHGAP35,PLXNC1,COBL,SIN3A,NRXN3,STXBP1,VSTM2L,USP9X,EFNA5,SEMA5A,PLXNA4,EPHA7,BMPR1B,BMPR2,TNC
[truncated: 88 more rows]

## Sheet: HvL_PFC
source	term_name	term_id	adjusted_p_value	negative_log10_of_adjusted_p_value	term_size	query_size	intersection_size	effective_domain_size	intersections
[truncated: 335 more rows]

[truncated: 3 more sheets: HvB_CBL, HvB_CBL_HumanUP, HvB_CBL_BaboonUP]
