# Supplementary material for: Tempo and mode of gene expression evolution in the brain across primates
Source: eLife. 2024 Jan 26;13:e70276. doi: 10.7554/eLife.70276 (PMC10876213; doi:10.7554/eLife.70276)
Supplement: Supplementary file 10. [file elife-70276-supp10.xlsx]

## Sheet: Cover
Table XX: Outlier Expression Analysis using the scoreGenes.R script in the EVEE-tools script set.
Dataset tabs are separated by brain region (CBL and PFC).
The first species listed in a column specifies in which species the outlier test was run. The species in parentheses specifies which species was used as a reference sample for that particular comparison in order to calculate the overall mean expression and variance for the dataset.
Reported in this table are the Z-Scores associated with each gene for the outlier expression test. A value of "NA" implies that the OU model was not the best fitting model for this particular gene and thus the outlier statistic is not computed.

## Sheet: CBL
gene	genes	Chimp (Human ref)	Chimp (Rhesus ref)	Lemur (Human ref)	Lemur (Siamang ref)	Human (Rhesus ref)	Siamang (Human Ref)	Siamang (Rhesus Ref)	Baboon (Human Ref)	Marmoset (Human Ref)	Marmoset (Siamang ref)	Rhesus (Human Ref)	Rhesus (Siamang Ref)
NG_000012.2	PCDHGC3	0.0313563	0.0549216	-0.375634	-0.414326	0.964799	-0.288566	0.0474007	-3.37806	1.16003	1.13046	-0.288566	-0.336392
NG_000017.2	PCDHB5	-1.53015	-1.49215	-0.779493	-0.812193	0.688364	0.289621	-1.03981	-3.10438	1.80177	1.74669	0.289621	0.244407
NG_002690.1	IPW	NA	NA	NA	NA	NA	NA	NA	NA	NA	NA	NA	NA
NG_005905.2	BRCA1	NA	NA	NA	NA	NA	NA	NA	NA	NA	NA	NA	NA
NG_006987.1	NIPBL	-0.499924	-0.483227	-0.51364	-0.522921	-0.502414	-1.09154	-0.9461	-2.94751	-0.860369	-0.873103	-1.09154	-1.09779
NG_006988.2	SMC1A	-0.102307	-0.0901908	-0.193671	-0.212378	-1.04354	1.48757	0.104609	-2.90153	1.35988	1.32951	1.48757	1.46085
NG_007009.1	CHD7	0.39638	0.404896	0.313576	0.302201	0.643869	0.734829	0.822535	-2.64383	0.738958	0.71883	0.734829	0.717267
NG_007066.1	FLT3	-0.967488	-0.959093	-1.43759	-1.4701	1.24588	1.92782	-1.02035	-2.61331	0.00753416	-0.021849	1.92782	1.92117
NG_007077.2	ETFA	2.39396	2.38753	0.487542	0.454907	2.18955	-0.510863	-0.557745	-2.45523	-0.921941	-0.962792	-0.510863	-0.548179
NG_007083.2	ADGRV1	-0.457471	-0.442941	-1.87716	-1.88783	0.207736	1.3413	1.72512	-2.20657	-0.158925	-0.174958	1.3413	1.33022
NG_007085.2	ZIC2	-0.208583	-0.195178	-1.02897	-1.04095	-1.11891	-2.09493	1.45407	-2.11896	0.397367	0.3677	-2.09493	-2.10675
NG_007088.1	ANOS1	NA	NA	NA	NA	NA	NA	NA	NA	NA	NA	NA	NA
NG_007092.2	CNTNAP2	-1.05781	-1.01872	-0.26114	-0.27509	1.22064	-0.962694	0.153398	-2.09801	0.39667	0.356215	-0.962694	-0.967105
NG_007093.3	PRKAR1A	NA	NA	NA	NA	NA	NA	NA	NA	NA	NA	NA	NA
NG_007097.2	ATP2A2	NA	NA	NA	NA	NA	NA	NA	NA	NA	NA	NA	NA
NG_007098.2	VPS13B	NA	NA	NA	NA	NA	NA	NA	NA	NA	NA	NA	NA
NG_007101.2	RAI1	NA	NA	NA	NA	NA	NA	NA	NA	NA	NA	NA	NA
NG_007107.2	MECP2	NA	NA	NA	NA	NA	NA	NA	NA	NA	NA	NA	NA
NG_007109.2	MLH1	-1.17733	NA	-1.44283	-1.48126	NA	0.783816	NA	-2.09088	-0.419305	-0.46544	0.783816	0.752286
NG_007110.2	MSH2	-1.22108	-1.1702	0.506647	0.434797	-0.694213	-0.165896	-0.729287	-2.08095	0.779031	0.674824	-0.165896	-0.238508
NG_007149.1	BCL6	NA	NA	NA	NA	NA	NA	NA	NA	NA	NA	NA	NA
NG_007262.1	OSTM1	1.4289	1.44766	-1.22601	-1.25856	-0.456215	1.54085	-1.43836	-2.06435	1.5537	1.53449	1.54085	1.5261
NG_007268.1	AP3B1	NA	NA	NA	NA	NA	NA	NA	NA	NA	NA	NA	NA
NG_007271.1	STAT5B	1.00992	1.00364	-0.937655	-0.952875	0.4854	-0.268347	1.69452	-2.05973	-0.559945	-0.584476	-0.268347	-0.290125
NG_007287.1	CA2	NA	NA	NA	NA	NA	NA	NA	NA	NA	NA	NA	NA
NG_007294.1	HADHB	0.770113	0.780799	-0.744448	-0.761615	1.78272	-0.220875	0.265825	-2.01722	1.75932	1.73536	-0.220875	-0.242437
NG_007370.1	STAT3	NA	NA	NA	NA	NA	NA	NA	NA	NA	NA	NA	NA
NG_007376.1	APP	0.244226	0.254724	0.0346161	0.00992495	3.34558	-0.41625	-0.616463	-1.99007	0.990534	0.957547	-0.41625	-0.448916
NG_007379.2	ATP2C1	0.878524	0.902032	-0.889864	-0.923746	0.595577	0.788085	1.08769	-1.98578	1.18115	1.16318	0.788085	0.769266
NG_007386.2	PSEN1	1.65061	1.68238	-0.426954	-0.45061	-0.0781938	-0.404649	2.08948	-1.98406	-0.31895	-0.351218	-0.404649	-0.433788
NG_007394.1	IFNGR1	NA	NA	NA	NA	NA	NA	NA	NA	NA	NA	NA	NA
NG_007397.1	LYST	NA	NA	NA	NA	NA	NA	NA	NA	NA	NA	NA	NA
NG_007418.1	FANCL	NA	NA	NA	NA	NA	NA	NA	NA	NA	NA	NA	NA
NG_007455.2	EXT1	-0.533437	-0.503152	-1.10771	-1.10995	0.152578	-0.0275961	-0.456212	-1.96164	1.51939	1.44984	-0.0275961	-0.0600756
NG_007459.1	PTPN11	-0.801097	-0.795839	-0.295817	-0.314366	1.66406	-0.613166	-0.397054	-1.92648	-0.756783	-0.781808	-0.613166	-0.635651
NG_007465.1	CD55	-0.152973	-0.138133	1.12585	1.12028	-0.305405	-0.0157025	0.263385	-1.89066	0.860219	0.848516	-0.0157025	-0.024052
NG_007473.2	XK	1.01829	1.0506	-2.25101	-2.28547	0.766672	-0.402225	-1.01329	-1.88844	0.838049	0.820374	-0.402225	-0.426735
NG_007484.2	CDK4	0.687942	0.707088	0.338008	0.324043	0.755976	0.106284	1.12702	-1.883	0.786397	0.761104	0.106284	0.0859613
NG_007486.1	PRKAG2	0.811083	0.819337	-1.26988	-1.28773	-1.67699	-0.790575	1.05032	-1.88184	0.87692	0.850759	-0.790575	-0.813458
NG_007488.1	RPS6KA3	NA	NA	NA	NA	NA	NA	NA	NA	NA	NA	NA	NA
NG_007491.2	FOXP2	-0.344265	-0.332485	-0.669746	-0.677232	0.355474	0.261497	0.352964	-1.80289	0.0179179	0.00282865	0.261497	0.248105
NG_007504.2	SHH	1.07904	1.08476	-2.51386	-2.55269	0.265319	0.272833	0.363813	-1.80163	0.836022	0.801025	0.272833	0.23999
NG_007529.2	FMR1	0.184716	0.202287	0.013871	-0.0108648	0.588999	0.489962	0.345191	-1.78032	1.0303	0.999025	0.489962	0.460396
NG_007530.1	SOS1	-0.0910505	-0.0738692	-2.54515	-2.58939	-0.114429	1.18192	0.528001	-1.7746	0.703011	0.665377	1.18192	1.15303
NG_007551.2	FHIT	0.782448	0.780478	-0.520283	-0.536294	-0.59149	-0.377631	-0.596023	-1.76784	-0.751206	-0.775523	-0.377631	-0.405048
NG_007560.1	EXT2	1.67349	1.68554	-1.24	-1.27477	-0.149475	-0.345115	-0.164286	-1.73505	-1.00604	-1.05016	-0.345115	-0.381295
NG_007563.2	PHEX	-0.0706428	-0.0634699	-0.163509	-0.176516	0.358784	0.718014	0.306582	-1.70166	0.0713486	0.0518353	0.718014	0.701065
NG_007570.2	TMEM50B	NA	NA	NA	NA	NA	NA	NA	NA	NA	NA	NA	NA
NG_007664.1	PTCH1	NA	NA	NA	NA	NA	NA	NA	NA	NA	NA	NA	NA
NG_007665.2	ARHGAP31	NA	NA	NA	NA	NA	NA	NA	NA	NA	NA	NA	NA
NG_007729.1	FGFR1	NA	NA	NA	NA	NA	NA	NA	NA	NA	NA	NA	NA
NG_007873.3	BRAF	0.850239	0.856239	0.748515	0.727219	0.673466	0.904136	0.945481	-1.70103	1.12402	1.09431	0.904136	0.877707
NG_007938.1	CYP3A5	NA	NA	NA	NA	NA	NA	NA	NA	NA	NA	NA	NA
NG_007947.2	SH3TC2	-0.358322	-0.331505	-2.78786	-2.81262	0.524225	0.372268	1.36603	-1.69422	-0.25198	-0.297274	0.372268	0.3329
NG_007951.1	SLC12A6	NA	NA	NA	NA	NA	NA	NA	NA	NA	NA	NA	NA
NG_007961.1	CYP2U1	-0.245126	-0.231867	0.594353	0.579082	0.232775	0.801796	0.995842	-1.69092	0.352284	0.325968	0.801796	0.781187
NG_007963.1	CYP46A1	1.31075	1.32485	1.07865	1.05943	-1.29882	0.497642	1.70039	-1.68593	-0.229179	-0.25374	0.497642	0.474557
NG_007968.1	CYP51A1	0.928147	0.93135	-1.52764	-1.53177	-0.96048	-0.469251	0.911742	-1.68345	-0.641539	-0.654726	-0.469251	-0.480497
NG_007977.1	FIG4	-1.17051	-1.17168	-0.982849	-1.00668	-0.862447	1.68016	1.50877	-1.6784	-0.54661	-0.575304	1.68016	1.67075
NG_007980.1	ABCB7	0.640777	0.644191	-0.866931	-0.880271	-0.325019	-0.550447	0.910145	-1.66553	-0.858141	-0.881151	-0.550447	-0.572172
NG_007984.3	WNK1	NA	NA	NA	NA	NA	NA	NA	NA	NA	NA	NA	NA
NG_008014.1	ATP1A2	NA	NA	NA	NA	NA	NA	NA	NA	NA	NA	NA	NA
NG_008015.1	ATP1A3	1.88697	1.88751	-2.13242	-2.16009	0.847827	1.63821	-0.236103	-1.66508	0.811972	0.794961	1.63821	1.62821
NG_008017.1	AUH	1.05353	1.06177	-1.5234	-1.56293	0.966787	1.17082	1.55168	-1.62868	-0.442805	-0.483912	1.17082	1.14615
NG_008020.1	RUNX2	NA	NA	NA	NA	NA	NA	NA	NA	NA	NA	NA	NA
NG_008034.1	COX10	-0.333824	-0.324357	0.892449	0.87868	0.747797	-0.358335	-0.0652852	-1.62676	0.366894	0.350701	-0.358335	-0.368446
NG_008044.1	DGUOK	NA	NA	NA	NA	NA	NA	NA	NA	NA	NA	NA	NA
NG_008045.1	DLD	2.0619	2.053	-0.204574	-0.223397	2.00935	-1.15774	-0.831897	-1.60818	0.258362	0.23186	-1.15774	-1.1807
NG_008053.1	ACSL4	NA	NA	NA	NA	NA	NA	NA	NA	NA	NA	NA	NA
NG_008054.1	FGD1	-0.0982652	-0.0876079	-0.946795	-0.954217	-0.835295	-0.716932	-0.587396	-1.60803	-0.741885	-0.760353	-0.716932	-0.732223
NG_008069.1	KIF1B	NA	NA	NA	NA	NA	NA	NA	NA	NA	NA	NA	NA
NG_008074.1	GLULP2	-2.07245	-2.09974	0.744709	0.721571	-0.0471897	0.483514	0.38136	-1.59907	-0.331224	-0.369933	0.483514	0.452869
NG_008091.1	FBXW4	0.600921	0.614369	-1.37327	-1.37697	-1.59447	0.257528	1.29436	-1.59268	0.472899	0.44296	0.257528	0.233632
NG_008092.1	L2HGDH	NA	NA	NA	NA	NA	NA	NA	NA	NA	NA	NA	NA
NG_008112.1	SIL1	0.365095	0.373037	-1.24786	-1.25288	1.30891	-0.0872526	0.206621	-1.58683	-1.47513	-1.48933	-0.0872526	-0.121741
NG_008126.1	TTC8	-0.639191	-0.628674	1.50771	1.48048	-0.624434	1.46226	-1.02733	-1.5827	0.449497	0.417759	1.46226	1.42963
NG_008127.1	DNAI1	NA	NA	NA	NA	NA	NA	NA	NA	NA	NA	NA	NA
NG_008131.3	PANK2	NA	NA	NA	NA	NA	NA	NA	NA	NA	NA	NA	NA
NG_008134.2	KCNC3	-0.913976	-0.893819	0.1699	0.133498	0.159165	0.264389	0.709693	-1.58079	1.14745	1.08634	0.264389	0.217867
NG_008138.1	PRCC	1.56604	1.5654	-0.637483	-0.655417	1.39958	-0.769148	1.74453	-1.57426	-0.588688	-0.61396	-0.769148	-0.79119
NG_008139.1	KCNQ4	-0.645074	-0.648487	-0.983976	-1.01526	-0.937551	-1.23108	0.282162	-1.56498	0.0364454	0.00384398	-1.23108	-1.2686
NG_008143.1	SCN2A	1.00482	1.00076	-1.35462	-1.38573	1.0785	0.816229	-0.656046	-1.55723	-0.164867	-0.205351	0.816229	0.778635
NG_008154.1	IRS2	0.647437	0.648792	0.660277	0.631792	0.415832	-1.47277	-0.054509	-1.54482	-0.355582	-0.378087	-1.47277	-1.47459
NG_008155.1	KIF5A	1.0507	1.06326	0.947398	0.943676	-1.22117	1.04942	-1.00933	-1.53429	0.838242	0.827451	1.04942	1.04302
NG_008178.1	GK	NA	NA	NA	NA	NA	NA	NA	NA	NA	NA	NA	NA
NG_008179.2	GTF2I	NA	NA	NA	NA	NA	NA	NA	NA	NA	NA	NA	NA
NG_008182.1	HSD17B4	1.18697	1.20274	-0.630656	-0.642806	1.27185	1.32381	1.27821	-1.53037	1.20607	1.19781	1.32381	1.31843
NG_008197.1	MID1	NA	NA	NA	NA	NA	NA	NA	NA	NA	NA	NA	NA
NG_008198.2	ATXN3	-0.385513	-0.372808	-2.73372	-2.79167	0.679247	1.15012	-0.525142	-1.53019	1.6679	1.65062	1.15012	1.13125
NG_008200.1	NDUFS4	NA	NA	NA	NA	NA	NA	NA	NA	NA	NA	NA	NA
NG_008218.2	POLG	0.582413	0.585179	-2.03087	-2.0316	-1.26474	-1.30035	0.959603	-1.52614	0.927814	0.909839	-1.30035	-1.30761
NG_008227.1	ATXN7	0.326694	0.337366	-1.7975	-1.82106	-0.688389	0.0690994	-0.0877294	-1.52508	-1.3203	-1.35995	0.0690994	0.0297412
NG_008228.2	SCO1	-0.210375	-0.193488	0.0299089	0.00673237	-1.41639	0.432502	2.73336	-1.52084	0.181232	0.145137	0.432502	0.401519
NG_008232.1	SLC2A1	NA	NA	NA	NA	NA	NA	NA	NA	NA	NA	NA	NA
NG_008238.1	ZNF41	NA	NA	NA	NA	NA	NA	NA	NA	NA	NA	NA	NA
NG_008239.1	PABPN1	-0.149165	-0.141242	0.673132	0.657821	-0.384623	0.471193	0.803219	-1.51906	0.637136	0.613852	0.471193	0.451248
NG_008245.1	PRPF3	0.538887	0.547914	0.839897	0.822319	-1.2885	0.52669	0.563742	-1.51496	0.884593	0.859223	0.52669	0.505813
NG_008246.1	GNE	-0.994832	-1.00267	1.56012	1.54784	0.425362	1.05722	1.31957	-1.51262	-0.563614	-0.599277	1.05722	1.03604
NG_008247.1	LRPPRC	NA	NA	NA	NA	NA	NA	NA	NA	NA	NA	NA	NA
NG_008248.2	PRG4	NA	NA	NA	NA	NA	NA	NA	NA	NA	NA	NA	NA
NG_008270.1	SEC63	0.455811	0.465273	-2.35659	-2.38866	-0.156199	0.886113	0.520505	-1.50823	-0.243107	-0.271689	0.886113	0.866288
NG_008273.1	ANKH	2.04631	2.06222	-0.821156	-0.829843	-0.134424	-0.188499	-0.390493	-1.50606	-0.731007	-0.747397	-0.188499	-0.201864
NG_008278.1	UTP4	NA	NA	NA	NA	NA	NA	NA	NA	NA	NA	NA	NA
NG_008284.1	SMNDC1	-1.47478	-1.45916	0.857848	0.839472	0.427887	1.16179	-1.107	-1.50581	0.774401	0.74976	1.16179	1.1377
NG_008288.2	PAK3	0.0602543	0.0673148	0.00513242	-0.0145556	-0.197903	0.234556	0.239939	-1.50359	-0.0622658	-0.0895878	0.234556	0.205753
NG_008289.1	PRKN	0.106336	0.108415	1.33032	1.29627	2.24307	-0.555642	0.230577	-1.49831	0.585132	0.53963	-0.555642	-0.596868
NG_008292.1	IL1RAPL1	-0.190293	-0.1641	-0.22922	-0.2608	-0.217534	0.723705	0.780041	-1.48002	0.34832	0.289462	0.723705	0.665378
NG_008305.1	MAP2K1	2.30815	2.32907	-2.4194	-2.44997	-0.635137	1.2079	1.89209	-1.47395	-0.0888684	-0.109309	1.2079	1.20035
NG_008315.1	TBX3	0.762615	0.772053	1.35888	1.32814	-2.04259	-0.585809	-1.6676	-1.44125	2.11862	2.07092	-0.585809	-0.614666
NG_008317.1	FGF14	-0.674553	-0.66831	-0.697518	-0.738023	0.371907	-0.309763	0.9575	-1.43198	-0.223308	-0.280938	-0.309763	-0.361252
NG_008319.1	PC	0.00709605	0.0199948	-0.369273	-0.392736	0.272704	0.672023	0.827931	-1.42865	0.0409021	0.0104274	0.672023	0.651412
NG_008338.2	CYP7B1	NA	NA	NA	NA	NA	NA	NA	NA	NA	NA	NA	NA
NG_008340.1	PEX14	NA	NA	NA	NA	NA	NA	NA	NA	NA	NA	NA	NA
NG_008388.1	NEFM	0.709076	0.709303	-1.52944	-1.52682	0.585251	-1.77731	-1.76637	-1.42499	0.57932	0.558672	-1.77731	-1.77534
NG_008391.2	DLG4	NA	NA	NA	NA	NA	NA	NA	NA	NA	NA	NA	NA
NG_008397.1	FBXO11	0.596455	0.611995	-2.80674	-2.87085	0.576993	0.83631	0.517325	-1.42253	-0.804308	-0.842938	0.83631	0.828908
NG_008408.1	YARS1	1.46986	1.47324	-1.24897	-1.27944	0.865364	-1.12248	1.24371	-1.41587	1.39621	1.38093	-1.12248	-1.15562
NG_008417.1	CEP290	-1.59766	-1.57513	-1.00409	-1.0139	-1.37973	0.853265	0.89378	-1.4149	0.638161	0.609882	0.853265	0.826562
NG_008418.1	EPM2AIP1	-1.16708	-1.16338	-0.653593	-0.6731	-1.04254	0.527102	1.11587	-1.4119	1.36609	1.34113	0.527102	0.504242
NG_008432.1	ABAT	NA	NA	NA	NA	NA	NA	NA	NA	NA	NA	NA	NA
NG_008433.1	DIAPH2	0.646478	0.64472	0.267693	0.246271	-0.0103438	-0.656657	-0.280023	-1.40307	0.456237	0.426868	-0.656657	-0.679291
NG_008434.1	GLI3	-0.0309275	-0.0155258	-1.73189	-1.77524	-2.08709	0.608634	0.0995856	-1.40094	1.42798	1.39481	0.608634	0.574779
NG_008437.1	SYN1	2.15821	2.17077	-0.108841	-0.118526	-0.912687	-0.724156	2.00581	-1.37944	-0.876756	-0.89376	-0.724156	-0.738052
NG_008441.1	LXN	NA	NA	NA	NA	NA	NA	NA	NA	NA	NA	NA	NA
NG_008459.1	PEX3	-2.50617	-2.50937	0.256601	0.205505	-0.985301	1.00729	-1.06015	-1.3787	0.665041	0.593478	1.00729	0.943823
NG_008461.1	GNG3	NA	NA	NA	NA	NA	NA	NA	NA	NA	NA	NA	NA
NG_008475.1	CDKL5	-0.0898613	-0.0859665	-2.25439	-2.2536	0.153478	1.14243	-0.308399	-1.37693	1.92167	1.89732	1.14243	1.12367
NG_008481.4	APC	0.527131	0.533432	0.397193	0.384469	0.360397	0.741657	-0.449789	-1.37428	1.0598	1.04258	0.741657	0.726006
NG_008483.2	CRB1	-0.0719922	-0.0612157	-2.29586	-2.28908	0.354475	1.0672	0.955898	-1.36891	-0.647813	-0.661353	1.0672	1.04272
NG_008489.1	SLC26A4	NA	NA	NA	NA	NA	NA	NA	NA	NA	NA	NA	NA
NG_008493.2	ESR1	NA	NA	NA	NA	NA	NA	NA	NA	NA	NA	NA	NA
NG_008604.1	PKD2	0.174317	0.184777	-1.4622	-1.49253	-0.315464	0.687885	0.636542	-1.36615	1.07792	1.06706	0.687885	0.675898
NG_008606.1	BLOC1S1	0.783951	0.79433	0.627862	NA	0.635351	0.375237	0.379415	-1.35657	-1.58929	NA	0.375237	NA
NG_008626.2	FGD4	-0.461813	-0.406758	0.228439	0.226549	0.135151	-0.280241	-0.331935	-1.34513	1.05292	1.01432	-0.280241	-0.27317
NG_008638.1	OCRL	0.00846514	0.0111937	1.62032	1.58296	0.206862	-0.168208	-0.292804	-1.34211	-0.458185	-0.484429	-0.168208	-0.19396
NG_008643.1	AHI1	0.591744	0.59785	-1.7583	-1.78015	0.78693	0.609046	0.421869	-1.34187	0.54699	0.527305	0.609046	0.592371
NG_008644.1	FIP1L1	1.5542	1.58979	-1.12447	-1.15703	-0.268957	1.7175	1.929	-1.33798	-0.486285	-0.517249	1.7175	1.72316
NG_008648.1	PMS1	NA	NA	NA	NA	NA	NA	NA	NA	NA	NA	NA	NA
NG_008649.1	MLH3	NA	NA	NA	NA	NA	NA	NA	NA	NA	NA	NA	NA
NG_008659.3	RS1	NA	NA	NA	NA	NA	NA	NA	NA	NA	NA	NA	NA
NG_008660.1	CAPN3	1.22465	1.22557	-1.13185	-1.13683	-0.6678	0.345943	-0.609015	-1.33337	0.478444	0.459451	0.345943	0.330167
NG_008675.1	COL6A2	-1.2814	-1.27134	-0.746343	-0.760343	-1.29003	0.683613	1.55272	-1.3311	-0.641968	-0.661647	0.683613	0.666169
NG_008679.1	PAX6	NA	NA	NA	NA	NA	NA	NA	NA	NA	NA	NA	NA
NG_008692.2	LMNA	-0.777634	-0.7729	-1.93857	-1.98042	-1.21928	0.840272	0.740539	-1.32471	0.319375	0.294053	0.840272	0.825234
NG_008693.2	SGCD	-0.514817	-0.480162	-0.233074	-0.257926	-0.538579	-0.735311	-0.500302	-1.31837	0.83053	0.766388	-0.735311	-0.758069
NG_008695.1	ZMPSTE24	-0.464606	-0.456505	-0.464118	-0.477518	0.451382	0.864014	0.69846	-1.31556	-0.559844	-0.581281	0.864014	0.841823
NG_008727.1	SLC1A2	0.492768	0.496546	-1.26775	-1.27558	0.0533585	1.20772	0.292826	-1.31226	2.03766	1.99643	1.20772	1.17597
NG_008734.1	TARDBP	0.76859	0.776682	0.748037	0.739454	-1.43939	0.858639	-0.773034	-1.30984	0.949492	0.936025	0.858639	0.847099
NG_008735.2	DCTN1	0.897689	0.899336	-1.74262	-1.75054	-1.96777	0.681209	0.828383	-1.30819	0.864291	0.84266	0.681209	0.662667
NG_008754.1	FKTN	-0.295646	-0.283303	0.930596	0.914791	-1.53126	1.78719	1.08012	-1.3055	-0.0641797	-0.0951313	1.78719	1.76866
NG_008768.1	PCCA	0.825071	0.834391	-1.26646	-1.2776	1.51942	0.265464	-0.390533	-1.30213	-1.049	-1.07129	0.265464	0.241168
NG_008775.1	ALS2	0.826732	0.836235	0.832068	0.817746	-0.878364	0.817942	1.0042	-1.2988	1.26669	1.24656	0.817942	0.799671
NG_008776.1	CNTF	0.826892	0.838867	0.566803	0.557694	-1.40077	1.2511	0.858787	-1.29484	0.0758791	0.0584613	1.2511	1.24153
NG_008787.3	GDAP1	NA	NA	NA	NA	NA	NA	NA	NA	NA	NA	NA	NA
NG_008788.1	ELP1	NA	NA	NA	NA	NA	NA	NA	NA	NA	NA	NA	NA
NG_008799.2	RYR2	-1.24135	-1.22431	0.530851	0.508392	-0.706488	1.08199	0.680116	-1.2903	-0.681419	-0.700279	1.08199	1.04831
NG_008801.2	CACNA1C	-0.098853	-0.0866934	-1.03429	-1.05287	0.254318	0.821554	0.764448	-1.28743	0.526022	0.501875	0.821554	0.801637
NG_008805.2	FBN1	NA	NA	NA	NA	NA	NA	NA	NA	NA	NA	NA	NA
NG_008807.2	DPYD	1.57925	1.5823	0.63835	0.616228	0.28462	-1.19139	-0.18436	-1.2874	-0.980772	-1.01129	-1.19139	-1.21907
NG_008835.1	CDH23	1.24254	1.26393	-2.05796	-2.09858	-0.870505	2.19558	-0.645654	-1.28596	0.337889	0.317438	2.19558	2.20188
NG_008838.2	ATRX	0.993539	0.997337	-0.902644	-0.911737	0.673811	1.0514	1.22511	-1.28274	-0.793614	-0.808706	1.0514	1.02972
NG_008852.2	INSR	0.956747	0.957441	-1.56142	-1.58109	-0.459067	-0.876854	-0.724092	-1.28219	1.20878	1.18464	-0.876854	-0.8998
NG_008854.2	KCNQ3	-0.10703	-0.0955744	1.09022	1.06456	0.506354	-0.587705	-1.22464	-1.2813	1.16267	1.12909	-0.587705	-0.59807
NG_008860.1	NBN	1.3842	1.38082	-1.2306	-1.23536	-0.722088	-1.30991	1.67979	-1.2801	-0.507358	-0.527157	-1.30991	-1.31917
NG_008863.2	PLP1	-0.832035	-0.83199	0.417678	0.40792	-1.34572	0.974234	-0.878045	-1.27852	0.91826	0.905346	0.974234	0.963446
NG_008865.1	ABCD3	-0.69009	-0.679179	-0.680103	-0.705476	-0.169515	0.776287	2.13335	-1.27441	-0.739929	-0.777854	0.776287	0.742092
NG_008867.1	ABCC8	NA	NA	NA	NA	NA	NA	NA	NA	NA	NA	NA	NA
NG_008868.1	VCL	NA	NA	NA	NA	NA	NA	NA	NA	NA	NA	NA	NA
NG_008873.1	ARHGEF6	-0.504002	-0.497133	-0.437617	-0.452032	-0.0707679	1.07206	0.477	-1.27404	1.21025	1.17857	1.07206	1.04387
NG_008875.1	GPHN	-0.502283	-0.489093	-2.24636	-2.27416	0.662733	1.2554	1.04659	-1.27363	-0.825193	-0.855404	1.2554	1.23922
NG_008878.1	CD2AP	0.431734	0.43791	-2.37412	-2.4086	0.622693	-1.09059	0.486803	-1.27107	1.31101	1.28803	-1.09059	-1.12327
NG_008881.1	NLGN4X	1.21602	1.22363	1.13372	1.11854	1.38911	0.102121	1.38588	-1.26962	-0.953411	-0.974825	0.102121	0.0830982
NG_008882.1	MCCC2	-0.608362	-0.602452	-1.49603	-1.51625	-0.961617	-0.780619	0.471287	-1.26754	1.73482	1.70174	-0.780619	-0.807016
NG_008885.1	SPG11	0.280228	0.303419	-1.2595	-1.30926	0.437189	0.504481	0.479393	-1.26718	0.76384	0.745799	0.504481	0.485638
NG_008886.1	PHF6	1.81933	1.81334	-0.292705	-0.312641	-1.32163	0.038821	0.594783	-1.26274	0.187816	0.156159	0.038821	0.0116394
NG_008893.2	SGCE	NA	NA	NA	NA	NA	NA	NA	NA	NA	NA	NA	NA
NG_008899.1	SGCZ	NA	NA	NA	NA	NA	NA	NA	NA	NA	NA	NA	NA
NG_008916.1	KCNH2	1.01671	1.02261	-1.0045	-1.05651	-0.876174	0.92815	1.44144	-1.25998	-0.241555	-0.269891	0.92815	0.948991
NG_008922.1	MOGS	1.28159	1.31189	-1.39905	-1.42741	0.11891	0.169518	0.483786	-1.259	0.887303	0.885443	0.169518	0.160017
NG_008923.1	DPM1	NA	NA	NA	NA	NA	NA	NA	NA	NA	NA	NA	NA
NG_008925.2	ALG6	NA	NA	NA	NA	NA	NA	NA	NA	NA	NA	NA	NA
NG_008926.1	ALG8	NA	NA	NA	NA	NA	NA	NA	NA	NA	NA	NA	NA
NG_008931.1	VPS13A	NA	NA	NA	NA	NA	NA	NA	NA	NA	NA	NA	NA
NG_008935.1	KCNQ1	-0.584726	-0.56854	-1.23256	-1.24396	-0.871691	-0.492172	0.267091	-1.25892	0.0256823	-0.00650199	-0.492172	-0.515971
NG_008951.1	ATR	NA	NA	NA	NA	NA	NA	NA	NA	NA	NA	NA	NA
NG_008959.1	MTR	0.687015	0.704673	0.649072	0.633826	-0.447064	1.04575	-1.4146	-1.25458	1.46003	1.43718	1.04575	1.02576
NG_008960.1	OPHN1	NA	NA	NA	NA	NA	NA	NA	NA	NA	NA	NA	NA
NG_008966.1	TUBA1A	1.19774	1.21539	0.423042	0.418125	1.10125	1.10348	1.07148	-1.25033	1.10236	1.09333	1.10348	1.09606
NG_008968.1	AGPS	1.00614	1.01286	-0.567106	-0.590729	0.862839	-0.840774	-0.225738	-1.24916	0.464633	0.430803	-0.840774	-0.870576
NG_008972.1	PDSS1	-0.35338	-0.345878	1.29031	1.26892	-0.363309	1.47232	-0.365863	-1.24895	1.19695	1.16847	1.47232	1.44563
NG_008978.1	NDUFAF2	2.17604	2.15609	-1.22098	-1.22838	-0.288652	-0.38963	1.53331	-1.24524	0.018302	-0.00801678	-0.38963	-0.40905
NG_008980.1	SPRED1	0.699376	0.704174	0.545771	0.532806	0.738318	-0.520553	0.567472	-1.23489	0.375463	0.356957	-0.520553	-0.535733
NG_008982.1	SLC22A5	0.520839	0.543379	-0.512187	-0.498053	-0.688517	0.953019	0.840199	-1.23488	1.19821	1.18091	0.953019	0.942117
NG_008991.2	RPGRIP1L	0.236187	0.23437	-1.68826	-1.71172	-0.043361	1.01913	0.378276	-1.23143	1.36344	1.33162	1.01913	0.990434
NG_008992.2	SPG21	NA	NA	NA	NA	NA	NA	NA	NA	NA	NA	NA	NA
NG_008994.1	CCDC50	0.372454	0.409016	-0.0758864	-0.123819	0.158564	0.711789	0.240899	-1.22728	0.0399136	-0.0278782	0.711789	0.670757
NG_009000.1	PKP2	0.11975	0.126271	-1.07252	-1.07733	-0.490373	1.10054	0.354019	-1.22278	-0.644169	-0.658678	1.10054	1.07542
NG_009005.1	GLB1	NA	NA	NA	NA	NA	NA	NA	NA	NA	NA	NA	NA
NG_009006.2	ANK2	-0.0396226	-0.0212636	0.0600157	0.026095	-0.407756	1.15447	0.690849	-1.21833	0.199547	0.152593	1.15447	1.13443
NG_009007.1	GAN	-0.631189	-0.607962	-1.85145	-1.87489	0.0908796	2.22426	0.696787	-1.21766	0.0818983	0.0249063	2.22426	2.15836
NG_009009.1	RB1	-0.173771	-0.163519	0.222327	0.207303	-0.363334	2.32229	-0.473342	-1.21747	0.0567092	0.0291741	2.32229	2.33337
NG_009018.1	EVI2A	NA	NA	NA	NA	NA	NA	NA	NA	NA	NA	NA	NA
NG_009028.1	ATL1	0.528271	0.53614	-1.63947	-1.65739	0.657844	0.718911	0.608265	-1.2069	0.456637	0.428993	0.718911	0.694467
NG_009057.1	NF2	NA	NA	NA	NA	NA	NA	NA	NA	NA	NA	NA	NA
NG_009062.1	NR3C1	0.217447	0.227452	-1.99252	-1.99859	1.01158	0.0909974	-0.0268708	-1.19424	0.150348	0.128138	0.0909974	0.0722068
NG_009072.1	VWF	NA	NA	NA	NA	NA	NA	NA	NA	NA	NA	NA	NA
NG_009080.1	SOX2	-0.431496	-0.423502	-1.21413	-1.2518	1.90914	1.42478	-0.874314	-1.19218	-0.0955643	-0.141371	1.42478	1.38986
NG_009090.2	GAST	1.24562	1.25333	-1.48613	-1.49545	-0.358686	0.963408	0.919021	-1.19057	0.966924	0.950727	0.963408	0.949689
NG_009099.1	GNAT2	NA	NA	NA	NA	NA	NA	NA	NA	NA	NA	NA	NA
NG_009109.1	MKKS	1.05403	1.07107	-1.9034	-1.92912	-0.770676	0.898266	-0.397083	-1.18736	1.40145	1.391	0.898266	0.887067
NG_009111.1	BBS7	-1.02654	-1.03373	1.33207	1.30468	-0.486046	-0.728259	-0.980476	-1.18733	1.63344	1.59763	-0.728259	-0.76383
NG_009114.1	PRKCG	NA	NA	NA	NA	NA	NA	NA	NA	NA	NA	NA	NA
NG_009118.1	PRPF8	0.892793	0.893837	-0.643051	-0.643811	-0.444081	-0.620113	2.27433	-1.18452	-0.268474	-0.280835	-0.620113	-0.624702
NG_009159.1	THRB	1.16852	1.17304	-0.966277	-0.976238	1.18138	1.18278	-0.515964	-1.18283	1.67265	1.63307	1.18278	1.15037
NG_009160.1	TSPAN7	-0.827888	-0.819702	-1.00709	-1.01124	-1.05347	1.32288	-0.798014	-1.18257	1.08819	1.06475	1.32288	1.30018
NG_009190.1	TMEM67	0.74623	0.749136	-0.987781	-0.999769	0.56097	0.2189	0.962333	-1.17973	0.114292	0.0933713	0.2189	0.200113
NG_009192.1	PPT1	-1.62108	-1.61833	0.973401	0.967498	0.713193	0.695621	0.729375	-1.17791	-1.47792	-1.50074	0.695621	0.684976
NG_009194.1	IMPDH1	0.0316983	0.0280799	-0.808537	-0.839433	0.365671	0.550873	0.511225	-1.17534	0.932353	0.90043	0.550873	0.52063
NG_009201.1	DTNA	0.706865	0.711211	-1.43282	-1.45363	0.849265	-0.540567	0.788278	-1.17483	0.889872	0.86293	-0.540567	-0.565356
NG_009205.2	POMGNT1	NA	0.62753	NA	0.562957	0.276561	NA	0.300748	NA	NA	0.458748	NA	0.250116
NG_009218.1	DLX1	NA	NA	NA	NA	NA	NA	NA	NA	NA	NA	NA	NA
NG_009222.1	ELK1	-0.388074	-0.371083	1.67515	1.66371	-0.541647	0.773044	1.5946	-1.17242	-0.216307	-0.244622	0.773044	0.752177
NG_009224.2	GRIK2	-0.424657	-0.412297	-1.71289	-1.79246	0.39962	0.319247	0.850376	-1.17088	1.87071	1.84122	0.319247	0.26729
NG_009231.1	HIRA	0.677723	0.682959	0.532101	0.515792	-0.696912	1.03667	-0.375218	-1.17018	1.35786	1.33146	1.03667	1.01424
NG_009233.1	YWHAE	1.48672	1.49004	0.749403	0.734289	1.1844	0.812678	1.09558	-1.16881	-1.04544	-1.07459	0.812678	0.793884
NG_009234.1	BTRC	0.691549	0.698572	-1.70731	-1.72651	0.294416	1.31438	1.60038	-1.16684	-0.412216	-0.440498	1.31438	1.28968
NG_009238.3	L3MBTL1	NA	NA	NA	NA	NA	NA	NA	NA	NA	NA	NA	NA
NG_009239.1	DYM	-0.106539	-0.0861217	-0.0949543	-0.105062	0.102892	-0.503538	0.422325	-1.165	1.99066	1.95708	-0.503538	-0.516285
NG_009240.1	LMBR1	NA	NA	NA	NA	NA	NA	NA	NA	NA	NA	NA	NA
NG_009241.1	UPF3B	0.265595	0.268617	-1.51543	-1.52321	0.886044	0.688483	-1.17484	-1.16397	0.696934	0.675809	0.688483	0.669778
NG_009242.1	ZIC4	0.134937	0.153162	-0.28529	-0.308348	0.419606	0.577189	0.235559	-1.16329	0.758605	0.73069	0.577189	0.552774
NG_009243.2	DISP1	0.117594	NA	-1.46106	NA	NA	-0.978378	NA	-1.1615	1.07335	NA	-0.978378	NA
NG_009244.1	BCR	-0.355226	-0.347238	-0.229539	-0.25087	2.15537	0.129342	0.0978991	-1.1604	0.793564	0.757892	0.129342	0.100597
NG_009245.1	BMPR1B	-0.29205	-0.181212	0.527564	0.516939	-0.125006	-1.06111	1.24522	-1.15745	-1.0291	-0.862978	-1.06111	-0.888069
NG_009248.1	EEF1B2	-1.19955	-1.20207	1.13916	1.1366	0.84333	0.50377	0.731734	-1.15402	-1.01365	-1.04669	0.50377	0.489522
NG_009263.1	NNAT	NA	NA	NA	NA	NA	NA	NA	NA	NA	NA	NA	NA
NG_009269.1	NSD2	-0.137228	-0.1286	-1.8932	-1.911	0.342302	0.924411	0.727134	-1.15285	0.912538	0.876544	0.924411	0.892418
NG_009274.1	AP1S2	0.743088	0.763173	-0.643319	-0.667111	0.540732	1.30284	1.00066	-1.15099	-1.19934	-1.23738	1.30284	1.29516
NG_009275.1	FBXW11	NA	NA	NA	NA	NA	NA	NA	NA	NA	NA	NA	NA
NG_009289.1	ERCC8	0.227275	0.235278	-0.73601	-0.74773	1.34083	1.08308	0.628965	-1.14543	0.393278	0.363469	1.08308	1.05106
NG_009290.1	GABRG2	0.432263	0.442744	1.06498	1.0456	0.508827	0.938278	0.840184	-1.14529	-0.77651	-0.80139	0.938278	0.913852
NG_009296.1	CD46	0.956343	0.974407	1.009	NA	0.669076	0.657304	0.850595	-1.13936	-0.750841	NA	0.657304	NA
NG_009298.1	TRIM37	NA	NA	NA	NA	NA	NA	NA	NA	NA	NA	NA	NA
NG_009305.1	EIF2B4	1.17696	1.19922	-1.26747	-1.2896	0.569027	1.12164	0.783913	-1.13804	-0.969485	-0.994213	1.12164	1.12083
NG_009306.1	BBS9	-0.470502	-0.460176	2.92612	2.89555	1.2769	-0.840769	1.10467	-1.13743	-0.161537	-0.190677	-0.840769	-0.863569
NG_009309.1	DTNBP1	0.627926	0.630576	-0.911464	-0.931542	0.590547	0.882876	0.829717	-1.13657	1.0921	1.07341	0.882876	0.86541
NG_009358.2	CACNA2D1	-0.273295	-0.262425	-0.861231	-0.877367	0.459158	-1.04777	-0.200459	-1.13507	1.04859	1.0067	-1.04777	-1.06843
NG_009361.1	BCL2	NA	NA	NA	NA	NA	NA	NA	NA	NA	NA	NA	NA
NG_009363.1	BMPR2	1.95578	1.95935	-0.8732	-0.891418	-0.0243623	1.56545	-0.683196	-1.13407	-0.0548423	-0.081599	1.56545	1.54309
NG_009365.1	DDB2	NA	NA	NA	NA	NA	NA	NA	NA	NA	NA	NA	NA
NG_009366.1	DYRK1A	0.773898	0.782888	0.742621	0.733641	-0.10475	0.942777	0.880835	-1.13347	0.913504	0.898153	0.942777	0.930459
NG_009367.1	FOXG1	NA	NA	NA	NA	NA	NA	NA	NA	NA	NA	NA	NA
NG_009370.1	GPC5	0.108907	NA	-1.29847	NA	NA	-1.55079	NA	-1.13279	-1.60633	NA	-1.55079	NA
NG_009377.2	GRIA3	-1.39443	-1.39204	-0.859488	-0.883606	-1.38172	1.09233	0.277248	-1.13277	-0.0153774	-0.0497552	1.09233	1.06411
NG_009378.1	HTT	NA	NA	NA	NA	NA	NA	NA	NA	NA	NA	NA	NA
NG_009388.1	CUL4B	1.17327	1.19665	-0.0100175	-0.0263651	1.12874	1.30554	1.1182	-1.13273	1.54015	1.52822	1.30554	1.29465
NG_009416.2	BBS4	0.731658	0.735334	-1.55336	-1.56148	-1.13539	0.681759	1.53511	-1.13143	1.0803	1.05812	0.681759	0.663172
NG_009445.1	ALK	NA	NA	NA	NA	NA	NA	NA	NA	NA	NA	NA	NA
NG_009492.1	IGF1R	1.52345	1.47241	-0.333178	-0.325265	-0.19011	-1.5412	0.123787	-1.13141	0.0443921	0.0268423	-1.5412	-1.49026
NG_009552.1	HGSNAT	NA	NA	NA	NA	NA	NA	NA	NA	NA	NA	NA	NA
NG_009553.1	RPGR	NA	NA	NA	NA	NA	NA	NA	NA	NA	NA	NA	NA
NG_009763.2	HPS4	NA	NA	NA	NA	NA	NA	NA	NA	NA	NA	NA	NA
NG_009775.1	BCKDHB	0.931874	0.936165	0.837477	0.814462	1.13747	1.45294	0.228766	-1.1276	-1.3796	-1.41283	1.45294	1.42372
NG_009796.1	GLMN	NA	NA	NA	NA	NA	NA	NA	NA	NA	NA	NA	NA
NG_009799.1	PAFAH1B1	NA	NA	NA	NA	NA	NA	NA	NA	NA	NA	NA	NA
NG_009817.1	EP300	NA	NA	NA	NA	NA	NA	NA	NA	NA	NA	NA	NA
NG_009821.1	NSD1	0.833686	0.836561	0.678799	0.659283	0.676433	-1.45526	-0.21913	-1.1228	1.40482	1.37313	-1.45526	-1.46153
NG_009830.1	ATM	-0.834074	-0.83642	-0.662563	-0.679586	0.892462	1.36617	1.07397	-1.12035	1.37723	1.36845	1.36617	1.35975
NG_009874.2	CHM	NA	NA	NA	NA	NA	NA	NA	NA	NA	NA	NA	NA
NG_009876.1	TAPBP	-0.167202	-0.154578	1.56469	1.56617	0.300586	0.369779	0.561733	-1.12032	1.20315	1.19039	0.369779	0.350996
NG_009887.1	MYO5A	0.757527	0.768109	-0.609334	-0.627662	-1.09717	0.967438	-1.0103	-1.11973	1.06659	1.04711	0.967438	0.950636
NG_009929.2	LARGE1	-0.375111	-0.368765	1.73549	1.71251	-0.700715	1.46699	1.47522	-1.11562	-0.631276	-0.656024	1.46699	1.43988
NG_009934.1	MYO6	1.18335	1.20201	-1.55438	-1.58669	1.34759	-0.840993	-0.405674	-1.11514	0.152752	0.137377	-0.840993	-0.867831
NG_011403.1	F8	-0.241165	-0.231103	-0.525988	-0.549639	-1.75212	1.77566	-0.955199	-1.11459	-1.2866	-1.32119	1.77566	1.74534
NG_011434.1	ADCY9	1.22054	1.23288	-1.04046	-1.06079	-0.384332	1.28984	1.35073	-1.113	1.48462	1.47293	1.28984	1.27951
NG_011443.1	ETV6	-0.522305	-0.5156	0.821396	0.801051	0.74756	0.205796	2.16963	-1.11161	2.1564	2.12924	0.205796	0.178595
NG_011445.2	FER	3.04333	3.02414	0.0745165	0.0591389	1.60051	-0.943569	-0.144555	-1.1081	-1.13102	-1.14167	-0.943569	-0.952978
NG_011447.1	GRIK3	1.43732	1.48025	-0.213112	-0.240808	1.13626	1.45292	0.80907	-1.10701	-1.74778	-1.8158	1.45292	1.44672
NG_011449.1	HMGCR	NA	NA	NA	NA	NA	NA	NA	NA	NA	NA	NA	NA
NG_011463.1	LAMC1	0.519429	0.523354	-1.5179	-1.52872	1.83257	-0.79263	-0.486033	-1.10605	0.0404043	0.0118767	-0.79263	-0.812892
NG_011467.1	MEIS1	-0.020429	-0.00887088	-1.34611	-1.35712	0.220996	0.558576	1.27384	-1.10257	0.888208	0.85187	0.558576	0.528444
NG_011471.2	P2RX7	NA	NA	NA	NA	NA	NA	NA	NA	NA	NA	NA	NA
NG_011482.1	AGRP	NA	NA	NA	NA	NA	NA	NA	NA	NA	NA	NA	NA
NG_011484.1	DLG5	NA	NA	NA	NA	NA	NA	NA	NA	NA	NA	NA	NA
NG_011487.1	MAGI2	0.574899	0.583958	-1.85467	-1.87321	-0.338637	0.604821	0.312145	-1.10222	-1.11981	-1.1626	0.604821	0.551233
NG_011490.1	ARFGEF2	0.176808	0.186281	0.202833	0.185624	-0.156322	0.677723	0.333175	-1.10025	0.850898	0.827973	0.677723	0.657408
NG_011493.1	AKAP10	0.45556	0.464153	-0.0217316	-0.045586	0.377292	-0.555538	-1.19427	-1.09947	-0.465683	-0.496574	-0.555538	-0.581366
NG_011499.1	JAZF1	1.53827	1.54309	-1.66819	-1.67861	1.5944	-0.477157	-0.875358	-1.09627	0.709699	0.687951	-0.477157	-0.493969
NG_011513.1	ABCB1	0.150285	0.158286	0.544533	0.518408	-0.282981	-1.39832	0.381702	-1.09339	1.71983	1.67134	-1.39832	-1.40755
NG_011517.2	LRP8	0.480184	0.492322	0.158237	0.143456	-2.0301	0.888161	0.716723	-1.09172	0.496705	0.477058	0.888161	0.875066
NG_011519.1	UBQLN1	0.949042	0.9638	0.868109	0.855056	-1.79849	1.33988	1.11837	-1.08687	-0.762571	-0.784652	1.33988	1.3226
NG_011520.1	ACSS2	0.661659	0.678977	-1.72523	-1.7591	-0.0496988	0.924298	0.517315	-1.07883	1.20617	1.19257	0.924298	0.911338
NG_011521.1	TSEN2	NA	NA	NA	NA	NA	NA	NA	NA	NA	NA	NA	NA
NG_011525.1	PACRG	0.121168	0.125958	-1.32155	-1.33415	0.527008	0.918094	1.27718	-1.07831	-0.084519	-0.113662	0.918094	0.885736
NG_011531.1	GFM2	-0.957541	-0.948407	-1.20018	-1.21458	0.619204	1.02079	-0.568068	-1.07731	1.08965	1.06747	1.02079	1.00168
NG_011538.1	KCNMB1	-1.03457	-1.02546	0.96255	0.916268	-0.590708	0.284468	-0.0631913	-1.07633	-0.455316	-0.492912	0.284468	0.241036
NG_011548.1	GABRA1	0.217675	0.228896	-2.95466	-2.99975	0.225135	0.503924	0.633813	-1.0749	0.824363	0.8001	0.503924	0.480967
NG_011553.2	NHS	NA	-0.453112	NA	-1.51212	-0.0335569	NA	1.53899	NA	NA	0.425653	NA	0.789424
NG_011569.1	CACNA1A	0.124194	0.147821	-0.858415	-0.864054	-1.07946	0.103007	0.634298	-1.07068	0.739969	0.703237	0.103007	0.0786181
NG_011570.1	PPP2R2B	1.40669	1.40154	-1.54563	-1.57026	-0.050192	-0.362183	1.51527	-1.07021	0.136496	0.0971302	-0.362183	-0.396112
NG_011571.1	ATXN1	NA	NA	NA	NA	NA	NA	NA	NA	NA	NA	NA	NA
NG_011572.2	ATXN2	0.29542	0.305382	0.229259	0.201125	-0.0724751	0.799728	0.628543	-1.06991	0.756651	0.712571	0.799728	0.759976
NG_011594.1	DIAPH1	0.562735	0.56627	1.80788	1.77109	-0.232063	-1.24889	-0.0325457	-1.06786	-0.401508	-0.438765	-1.24889	-1.27766
NG_011605.1	OPA1	-0.493523	-0.472889	-1.14835	-1.15424	-0.375131	-0.561191	1.62716	-1.06493	-0.327643	-0.340635	-0.561191	-0.57138
NG_011612.1	USF1	NA	NA	NA	NA	NA	NA	NA	NA	NA	NA	NA	NA
NG_011622.1	SNTA1	NA	NA	NA	NA	NA	NA	NA	NA	NA	NA	NA	NA
NG_011623.1	AKAP9	0.640342	0.639226	-1.51639	-1.53217	-0.00903036	0.736038	0.552338	-1.06343	0.898684	0.8771	0.736038	0.716872
NG_011633.1	TECTA	0.895981	0.903587	-0.360135	-0.370202	-1.27575	1.67968	0.80076	-1.06093	-2.13515	-2.13469	1.67968	1.6449
NG_011650.1	RASA1	NA	NA	NA	NA	NA	NA	NA	NA	NA	NA	NA	NA
NG_011652.1	PCDH11Y	-0.486826	-0.480627	-0.380286	-0.390296	1.04616	1.03252	1.04437	-1.05633	0.923345	0.897061	1.03252	1.00776
NG_011674.1	GATM	-0.384934	-0.38193	0.195888	0.183461	-0.267846	1.86788	1.61179	-1.05403	-1.14344	-1.19026	1.86788	1.88248
NG_011678.1	PPM1B	NA	NA	NA	NA	NA	NA	NA	NA	NA	NA	NA	NA
NG_011679.1	SUMO1	0.437473	0.440257	-1.9873	-2.01266	0.943728	-1.33338	0.508387	-1.05268	-1.05805	-1.08683	-1.33338	-1.3605
NG_011690.1	ALMS1	1.22079	1.22594	1.91115	1.8674	1.16447	-0.101658	-0.922634	-1.0505	0.810313	0.763569	-0.101658	-0.134665
NG_011698.1	WWOX	NA	NA	NA	NA	NA	NA	NA	NA	NA	NA	NA	NA
NG_011702.1	SLC25A3	1.00362	0.968264	-1.11202	-1.13783	0.863989	1.05645	-1.15765	-1.04823	-0.961814	-0.992069	1.05645	1.04676
NG_011707.1	FANCC	0.593259	0.590999	-0.749112	-0.76723	-0.0717693	1.37945	0.562723	-1.04796	-0.159496	-0.188986	1.37945	1.34392
NG_011709.1	LRRK2	-0.107944	-0.0974033	-0.579179	-0.58244	-0.071662	-0.726197	0.621689	-1.04622	0.012071	-0.0031235	-0.726197	-0.73151
NG_011715.1	TGFB3	1.57964	1.59067	0.455546	0.428553	-1.72662	-0.858151	1.73466	-1.04613	-0.210228	-0.247687	-0.858151	-0.891011
NG_011716.2	TCF4	NA	NA	NA	NA	NA	NA	NA	NA	NA	NA	NA	NA
NG_011723.1	ZFPM2	-0.463467	-0.453026	-0.924649	-0.939834	0.893343	1.09602	1.164	-1.04557	-1.78403	-1.80699	1.09602	1.07445
NG_011728.2	SYN2	NA	NA	NA	NA	NA	NA	NA	NA	NA	NA	NA	NA
NG_011729.1	ROBO1	0.961971	0.965376	-1.13187	-1.13843	0.610999	0.798421	0.502804	-1.04063	0.689182	0.66891	0.798421	0.780027
NG_011733.1	SEMA7A	-1.26261	-1.26188	-1.78299	-1.80413	0.515026	0.630683	0.412764	-1.0379	1.31308	1.3037	0.630683	0.619831
NG_011756.1	SYNE2	NA	NA	NA	NA	NA	NA	NA	NA	NA	NA	NA	NA
NG_011781.1	SLC25A12	0.750683	0.757315	0.699701	0.68141	-0.989474	1.00811	-1.39036	-1.0361	1.63154	1.60152	1.00811	0.983803
NG_011782.1	GLIS3-AS1	0.302167	0.310131	0.436496	0.421856	1.58136	-0.37966	0.469322	-1.03609	-1.33992	-1.34895	-0.37966	-0.392809
NG_011787.1	NFIA	-0.35729	-0.34349	-0.854753	-0.863826	-0.0213305	0.685374	-0.429409	-1.03409	1.06018	1.0298	0.685374	0.66075
NG_011791.1	ACVR2B	NA	NA	NA	NA	NA	NA	NA	NA	NA	NA	NA	NA
NG_011794.1	BDNF	0.758474	0.75461	-0.578035	-0.596426	0.205495	-0.966024	0.575868	-1.03142	-0.0232125	-0.0664255	-0.966024	-0.982438
NG_011800.2	CP	0.601488	0.613638	2.10503	2.08757	0.720123	-0.191081	0.612118	-1.0274	0.737923	0.708855	-0.191081	-0.218196
NG_011802.1	DRD1	NA	NA	NA	NA	NA	NA	NA	NA	NA	NA	NA	NA
NG_011805.1	ERBB4	-0.238897	-0.175315	-1.23761	-1.16487	0.63678	-1.18911	0.128858	-1.02509	-1.95241	-1.85338	-1.18911	-1.12899
NG_011809.1	GABRA4	NA	NA	NA	NA	NA	NA	NA	NA	NA	NA	NA	NA
NG_011810.1	GBE1	-0.174259	-0.16447	1.22229	1.21976	-1.36429	1.27834	-0.573005	-1.01928	-0.402784	-0.427853	1.27834	1.27143
NG_011811.2	GGCX	-0.369442	-0.362287	1.01845	1.00327	-0.65802	0.141371	1.28437	-1.01915	0.462741	0.440624	0.141371	0.121626
NG_011812.1	GRIN2A	-0.559822	-0.536659	-1.77653	-1.77106	-0.191927	-0.698992	-0.32085	-1.0155	1.20192	1.16561	-0.698992	-0.710833
NG_011815.1	KCNA1	0.00958149	0.02841	0.243863	0.234164	0.204942	0.186606	0.242078	-1.01396	0.604959	0.586077	0.186606	0.171327
NG_011817.1	LIFR	-0.576511	-0.573419	-1.48549	-1.514	0.901748	1.31401	0.192157	-1.00716	1.60223	1.59614	1.31401	1.30778
NG_011823.1	OXCT1	-0.206535	-0.200364	-0.519393	-0.536127	-0.947078	1.52224	1.32076	-1.00376	1.48224	1.45788	1.52224	1.50065
NG_011831.2	STX16	0.701413	0.701062	-2.00105	-2.00683	0.429751	-0.727415	0.308035	-0.998022	1.09876	1.06456	-0.727415	-0.746215
NG_011832.1	LGI1	0.467956	0.47924	-2.65123	-2.68417	0.362667	0.57764	-1.1088	-0.997966	0.666272	0.638027	0.57764	0.553095
NG_011836.1	ZFYVE26	0.823189	0.836277	-0.251681	-0.262434	-0.681748	1.2378	0.896608	-0.997302	0.39609	0.381062	1.2378	1.22813
NG_011847.1	KCNJ13	NA	NA	NA	NA	NA	NA	NA	NA	NA	NA	NA	NA
NG_011852.2	DBT	NA	NA	NA	NA	NA	NA	NA	NA	NA	NA	NA	NA
NG_011854.2	GALNT2	2.16826	2.18198	-0.386	-0.401812	-0.662564	2.10014	-0.16026	-0.995382	0.0804696	0.0587323	2.10014	2.09382
NG_011875.1	GRID1	1.2609	1.26053	-0.0915276	-0.106959	0.758637	0.15425	-0.821776	-0.991275	-1.05801	-1.07048	0.15425	0.12971
NG_011876.1	PCDH9	NA	NA	NA	NA	NA	NA	NA	NA	NA	NA	NA	NA
NG_011877.1	RELN	NA	NA	NA	NA	NA	NA	NA	NA	NA	NA	NA	NA
NG_011878.1	NRXN1	-0.759934	-0.733692	1.10072	1.06567	0.5698	-1.13746	0.409737	-0.991263	0.698708	0.661087	-1.13746	-1.14102
NG_011880.1	GPC6	0.21388	0.22013	-0.556298	-0.569814	-0.420221	-0.970535	0.600237	-0.989994	2.32576	2.25749	-0.970535	-0.983909
NG_011881.1	NPM1P3	NA	NA	NA	NA	NA	NA	NA	NA	NA	NA	NA	NA
NG_011901.1	ACTR1A	0.501923	0.506074	-1.19693	-1.19773	0.989151	-1.05267	0.947167	-0.983211	1.07447	1.05215	-1.05267	-1.05775
NG_011906.1	SCN1A	1.38661	1.39978	-1.51808	-1.54263	-1.55691	0.0895866	0.383825	-0.982033	1.02603	1.00709	0.0895866	0.0687825
NG_011937.1	AP1G2	0.466893	0.475011	-1.03649	-1.0476	0.228698	0.622308	0.500431	-0.981915	0.1536	0.131782	0.622308	0.602225
NG_011958.1	NOG	0.317709	0.329957	-1.00621	-1.03647	-1.22589	0.127931	-0.560861	-0.979604	0.214949	0.167922	0.127931	0.086818
NG_011959.1	CDH2	-0.248817	-0.244781	-0.0230149	NA	-0.762608	-0.405875	-0.244944	-0.978019	-1.08158	NA	-0.405875	NA
NG_011964.1	ARG2	0.212548	0.241397	0.952579	0.947324	0.288993	0.789957	0.524205	-0.97723	0.215636	0.17517	0.789957	0.770854
NG_011965.1	MAP3K5	NA	NA	NA	NA	NA	NA	NA	NA	NA	NA	NA	NA
NG_011966.2	MAP3K7	0.389285	0.399422	0.123519	0.102305	-1.67458	0.0216879	-0.558907	-0.97318	1.2214	1.18414	0.0216879	-0.00479604
NG_011970.1	CSNK2A1	-0.0931281	-0.0804574	-2.96303	-2.98375	-2.12943	0.523633	0.469542	-0.972531	0.452509	0.428209	0.523633	0.502751
NG_011987.2	ABR	NA	NA	NA	NA	NA	NA	NA	NA	NA	NA	NA	NA
NG_011988.1	GPM6B	NA	NA	NA	NA	NA	NA	NA	NA	NA	NA	NA	NA
NG_011990.1	SMAD3	0.87457	0.885812	0.343717	0.324366	-2.34501	0.686848	0.609509	-0.972067	1.35802	1.33251	0.686848	0.662693
NG_011993.1	TOX	2.31821	2.31885	0.799354	0.796253	-0.0336544	-0.497454	-0.151822	-0.969128	-0.14163	-0.146856	-0.497454	-0.495036
NG_012005.1	NRG1	NA	NA	NA	NA	NA	NA	NA	NA	NA	NA	NA	NA
NG_012011.2	SSPN	0.0477781	0.0849747	-0.946855	-1.02058	0.423145	0.621338	-0.0263477	-0.966728	1.18534	1.14142	0.621338	0.57299
NG_012037.1	ADD1	0.138101	NA	-1.36335	NA	NA	0.959709	NA	-0.964931	0.867863	NA	0.959709	NA
NG_012038.2	AKT2	-0.386005	-0.37485	-2.50856	-2.51303	0.503016	-0.0681805	0.789445	-0.961973	0.202507	0.175418	-0.0681805	-0.0905867
NG_012042.1	BIN1	NA	NA	NA	NA	NA	NA	NA	NA	NA	NA	NA	NA
NG_012046.1	ATP2B2	NA	NA	NA	NA	NA	NA	NA	NA	NA	NA	NA	NA
NG_012058.2	CNTN1	0.784381	0.79557	0.850909	0.836632	-1.05745	1.21341	-1.64492	-0.956274	-0.891533	-0.935793	1.21341	1.19638
NG_012061.1	CYLD	-0.741448	-0.73004	1.1058	1.08918	-1.17993	-0.0431706	-1.65091	-0.954225	1.66588	1.64175	-0.0431706	-0.0671334
NG_012077.1	HK1	-0.555761	-0.558581	1.64101	1.65242	-0.80084	1.36681	-0.544303	-0.953162	1.75078	1.75694	1.36681	1.37032
NG_012082.2	HTR2C	0.0162666	0.0169425	-0.142624	-0.162941	-0.705719	-0.815907	0.502155	-0.952804	0.396645	0.376588	-0.815907	-0.848143
NG_012091.1	IMPDH2	1.04366	1.06034	-1.45747	-1.48589	-1.15768	0.852607	0.951441	-0.948648	0.835239	0.82672	0.852607	0.847145
NG_012097.1	LMAN1	-0.865625	-0.85751	1.11359	1.09464	-1.54114	-1.0002	-0.725149	-0.944498	1.51831	1.49013	-1.0002	-1.01202
NG_012103.1	MXI1	0.929455	0.945042	-0.735018	-0.751153	0.965532	1.09814	-0.763766	-0.944398	1.17837	1.16397	1.09814	1.08639
NG_012106.1	OGG1	0.761424	0.762189	-2.60358	-2.64064	0.42957	0.245801	0.581272	-0.943891	0.304377	0.271091	0.245801	0.216475
NG_012107.1	OPCML	-0.262736	-0.241181	-1.62833	-1.62359	0.394604	0.0938489	-0.461471	-0.942385	-1.3425	-1.35312	0.0938489	0.0675369
NG_012113.2	PIK3CA	0.262312	0.2685	-0.851252	-0.874474	0.74101	0.846776	0.820892	-0.942018	1.24491	1.22073	0.846776	0.824526
NG_012117.1	PPP2R1B	0.209924	0.227324	-1.41474	-1.4304	-1.87937	0.288297	1.0541	-0.9328	0.552255	0.540098	0.288297	0.277691
NG_012119.1	PTPN1	NA	NA	NA	NA	NA	NA	NA	NA	NA	NA	NA	NA
NG_012131.1	SNCB	NA	NA	NA	NA	NA	NA	NA	NA	NA	NA	NA	NA
NG_012138.1	TSG101	1.0145	1.01521	-1.23237	-1.25688	1.68045	-1.20467	0.51628	-0.929846	1.47827	1.44945	-1.20467	-1.23437
NG_012140.1	ZBTB16	-0.243726	-0.227778	-1.14369	-1.16287	0.222265	1.44718	0.264411	-0.927977	0.441346	0.418164	1.44718	1.43203
NG_012141.2	TUSC3	NA	NA	NA	NA	NA	NA	NA	NA	NA	NA	NA	NA
NG_012142.1	AXIN2	0.456388	0.469602	0.782153	0.775077	-1.29683	0.949495	1.04154	-0.927627	1.13896	1.12782	0.949495	0.939423
NG_012144.1	RAD54L	0.350958	0.371862	-1.35033	-1.38848	0.0714138	1.59811	-0.743892	-0.924025	-0.799893	-0.836283	1.59811	1.61096
NG_012150.1	PAPSS2	-0.343763	-0.311597	-0.130799	-0.126427	-2.13439	-0.321389	2.51513	-0.920997	0.573698	0.564964	-0.321389	-0.320507
NG_012168.1	SDHDP5	-0.14111	-0.134587	-0.678023	-0.692941	-0.185585	2.46495	-0.786466	-0.920063	0.505046	0.479423	2.46495	2.43681
NG_012170.1	RAB23	1.3177	1.33598	-1.16389	-1.18726	-0.868987	1.48531	1.20358	-0.919313	-0.185047	-0.208714	1.48531	1.47762
NG_012172.1	ADAMTSL4	0.111195	0.130191	-0.581382	-0.594519	-0.570725	-0.867862	1.29502	-0.917625	0.433513	0.411351	-0.867862	-0.886363
NG_012174.1	MRPS22	0.970473	0.984591	-0.561527	-0.576899	0.98392	0.124632	-0.680992	-0.913843	1.56387	1.55247	0.124632	0.108422
NG_012175.1	XYLT2	NA	NA	NA	NA	NA	NA	NA	NA	NA	NA	NA	NA
NG_012182.1	UBR1	0.726034	0.731895	-1.69351	-1.70128	-0.737003	-0.952463	0.942438	-0.913334	1.2568	1.23375	-0.952463	-0.966404
NG_012187.1	ADRB1	0.141985	0.218904	-1.01456	-0.407952	0.399018	-2.95055	0.331303	-0.912961	0.831594	0.548399	-2.95055	-1.42324
NG_012199.1	KHK	NA	NA	NA	NA	NA	NA	NA	NA	NA	NA	NA	NA
NG_012201.2	NTRK2	NA	NA	NA	NA	NA	NA	NA	NA	NA	NA	NA	NA
NG_012203.1	PLA2G4A	NA	NA	NA	NA	NA	NA	NA	NA	NA	NA	NA	NA
NG_012209.1	PTPRJ	0.00291703	0.00492462	-0.575886	-0.596262	-0.245657	-0.348238	-0.941067	-0.912345	0.177503	0.145286	-0.348238	-0.374636
NG_012211.1	SCP2	NA	NA	NA	NA	NA	NA	NA	NA	NA	NA	NA	NA
NG_012219.1	DNM1L	0.160101	0.16944	0.654221	0.632276	-0.0136956	0.791377	0.889541	-0.911505	1.0827	1.05043	0.791377	0.763497
NG_012232.1	DMD	-0.704818	-0.700034	-1.00397	-1.04519	-0.82332	1.87054	0.191634	-0.908039	-0.398902	-0.445628	1.87054	1.85982
NG_012238.1	PIGM	0.726221	0.769079	0.352241	0.328076	-0.175773	0.385851	1.39916	-0.906501	-0.192381	-0.256547	0.385851	0.351437
NG_012247.1	SLC25A13	0.180365	0.186629	-1.38511	-1.40116	0.848346	1.9687	-0.755843	-0.902739	-0.395067	-0.42547	1.9687	1.93074
NG_012257.2	ALDH6A1	0.236866	0.248386	0.293812	0.276251	0.0626467	0.653178	0.491232	-0.895316	1.3349	1.31172	0.653178	0.631321
NG_012258.1	ALDH18A1	-0.935044	-0.929598	-2.00964	-2.03177	0.856661	1.59365	-0.595355	-0.892806	-0.715715	-0.744432	1.59365	1.57184
NG_012262.1	TOP1	1.41061	1.41057	-0.011726	-0.026932	-0.836555	-0.109226	1.5474	-0.892121	1.70692	1.68964	-0.109226	-0.129528
NG_012265.1	MCC	1.10425	1.12353	-1.51583	-1.52587	0.924512	1.08428	0.767947	-0.891764	-0.728742	-0.743006	1.08428	1.07795
NG_012270.1	KCNMA1	0.359687	0.36797	-0.0123545	-0.0312633	-0.588015	1.07134	1.0198	-0.891238	1.20083	1.16973	1.07134	1.04423
NG_012277.1	KLF6	NA	NA	NA	NA	NA	NA	NA	NA	NA	NA	NA	NA
NG_012302.1	UNC119	0.00823054	0.0215139	-0.571505	-0.583161	-1.08411	0.158422	0.831455	-0.88767	0.0634501	0.0410095	0.158422	0.138928
NG_012303.1	CSF1R	NA	NA	NA	NA	NA	NA	NA	NA	NA	NA	NA	NA
NG_012318.1	INA	-0.412524	-0.399386	0.0478932	0.0341997	1.50032	-0.76708	-1.16112	-0.887495	1.73666	1.70381	-0.76708	-0.779632
NG_012337.3	SDHD	NA	NA	NA	NA	NA	NA	NA	NA	NA	NA	NA	NA
NG_012343.1	ITGA7	-2.4884	-2.48485	-1.64598	-1.67461	0.163618	0.106475	0.212189	-0.884628	1.08809	1.06927	0.106475	0.0844428
NG_012344.1	ATP6V1G2	-1.04408	-1.03767	0.946114	0.936816	1.29404	1.03076	1.21766	-0.882484	-1.20925	-1.22205	1.03076	1.01864
NG_012345.1	PPARD	NA	NA	NA	NA	NA	NA	NA	NA	NA	NA	NA	NA
NG_012383.3	TRPS1	-1.33891	-1.25136	0.509082	0.470307	-0.0332479	-2.65068	0.289441	-0.882185	0.267939	0.229701	-2.65068	-2.54169
NG_012386.1	TSC1	NA	NA	NA	NA	NA	NA	NA	NA	NA	NA	NA	NA
NG_012447.2	HCRTR2	NA	NA	NA	NA	NA	NA	NA	NA	NA	NA	NA	NA
NG_012490.1	SOX9	NA	NA	NA	NA	NA	NA	NA	NA	NA	NA	NA	NA
NG_012494.1	AMELX	0.416391	0.432837	0.0370927	0.0205301	-1.05707	3.08663	-0.865652	-0.879752	-0.761893	-0.794311	3.08663	3.08998
NG_012496.1	CLCN4	-1.05601	-1.0574	1.4774	1.46444	-0.505562	-0.49355	1.49833	-0.87917	-0.510082	-0.531535	-0.49355	-0.512593
NG_012515.2	KCND1	0.909313	0.933024	-0.467109	-0.48936	-0.968294	1.83156	0.643085	-0.878368	-0.709755	-0.743824	1.83156	1.83376
NG_012518.2	PLS3	NA	NA	NA	NA	NA	NA	NA	NA	NA	NA	NA	NA
NG_012519.1	PPEF1	-0.758517	-0.710232	0.259705	0.249823	-1.96431	-0.57524	0.134104	-0.878219	1.85193	1.79462	-0.57524	-0.572525
NG_012526.1	SMARCA1	1.041	1.05408	-1.17221	-1.18928	1.34054	1.12599	1.23331	-0.87772	-0.333162	-0.352937	1.12599	1.11452
NG_012533.1	TIMP1	1.34819	1.35286	-1.67461	-1.70474	-0.905543	0.821671	-0.0739619	-0.877445	0.930907	0.919498	0.821671	0.811678
NG_012547.1	USP9X	1.33656	1.34053	-0.742002	-0.747933	1.35251	-1.01496	-0.835525	-0.876878	0.851391	0.825297	-1.01496	-1.02271
NG_012548.1	RBM10	0.787754	0.799968	-0.122047	-0.135945	-1.56	0.82854	0.880393	-0.874972	1.03127	1.01511	0.82854	0.814301
NG_012549.1	PIR	NA	NA	NA	NA	NA	NA	NA	NA	NA	NA	NA	NA
NG_012551.1	MTMR1	-0.838188	-0.834289	-0.694814	-0.714376	-0.99767	0.948687	1.19698	-0.873201	-0.412889	-0.439518	0.948687	0.928675
NG_012557.1	REPS2	-0.770326	-0.764148	0.273929	0.27648	0.909954	0.503612	-0.652502	-0.863737	1.03133	1.0576	0.503612	0.511825
NG_012558.1	RAB33A	2.28171	2.26213	-1.23311	-1.22974	-1.3779	-0.642324	0.4831	-0.863109	1.91945	1.87708	-0.642324	-0.651851
NG_012565.1	SEPTIN6	NA	NA	NA	NA	NA	NA	NA	NA	NA	NA	NA	NA
NG_012566.3	IL1RAPL2	-0.714976	-0.70334	0.519599	0.50494	-2.26448	0.819911	1.00917	-0.862634	-1.45373	-1.47688	0.819911	0.800109
NG_012570.1	TAF9B	-0.258453	-0.243183	-0.00871512	-0.0371493	1.74769	1.03521	1.15248	-0.861443	0.421858	0.384096	1.03521	1.00998
NG_012577.1	LONRF3	-0.411689	-0.407266	-1.03022	-1.04741	-1.30593	-0.392654	-1.32742	-0.860005	1.96301	1.92255	-0.392654	-0.418048
NG_012622.2	SLC9A7	-0.305267	-0.29603	-2.36247	-2.39858	0.452405	0.427894	0.605291	-0.859391	-2.71556	-2.76302	0.427894	0.405072
NG_012624.1	TWNK	0.90031	0.89605	0.232566	0.209531	0.1878	-2.8582	-0.179018	-0.856557	0.765657	0.723876	-2.8582	-2.83707
NG_012631.1	TCF7L2	-0.0341325	-0.0154558	-1.05248	-1.07712	-0.62119	2.19969	-0.346348	-0.855665	0.0583372	0.0155009	2.19969	2.1561
NG_012633.1	RPS24	NA	-0.510633	NA	-0.675773	-0.37913	NA	0.556916	NA	NA	1.16002	NA	-0.335461
NG_012640.1	ADRA2C	NA	NA	NA	NA	NA	NA	NA	NA	NA	NA	NA	NA
NG_012641.1	CACNB4	0.68015	0.678804	-1.79433	-1.78517	0.456093	-1.11889	-1.14509	-0.854438	-1.11717	-1.12676	-1.11889	-1.12537
NG_012642.1	CHN1	0.64119	0.64599	-2.27003	-2.29155	0.803417	0.773967	0.72929	-0.850664	0.861801	0.840679	0.773967	0.755416
NG_012648.1	TTC9	-0.900857	-0.874998	1.21515	1.19003	-0.999278	-0.505943	1.45854	-0.843035	-0.94449	-0.942995	-0.505943	-0.508612
NG_012649.1	ANTXR1	0.66631	0.671279	0.00623314	-0.0159159	0.759508	0.274122	0.10506	-0.836223	-0.985636	-1.01024	0.274122	0.243934
NG_012653.1	SLC4A4	-1.04999	-1.02946	0.914352	0.879968	-0.977006	-0.415109	-1.36483	-0.836203	-0.389433	-0.411249	-0.415109	-0.433198
NG_012663.1	CACNA2D4	NA	NA	NA	NA	NA	NA	NA	NA	NA	NA	NA	NA
NG_012664.1	TTBK2	-1.04029	-1.02015	0.102344	0.0812803	0.226661	-0.206548	1.60601	-0.829006	-0.602466	-0.627643	-0.206548	-0.230906
NG_012682.1	VCAN	NA	NA	NA	NA	NA	NA	NA	NA	NA	NA	NA	NA
NG_012691.1	B3GALT2	-0.160197	-0.149522	-0.0459526	-0.0846958	-0.594144	-0.10963	-0.372677	-0.827101	0.252114	0.196792	-0.10963	-0.157908
NG_012742.2	KALRN	NA	NA	NA	NA	NA	NA	NA	NA	NA	NA	NA	NA
NG_012745.1	SIX5	-0.814529	-0.810065	-1.0566	-1.07304	0.757332	1.09894	1.24238	-0.823723	0.686575	0.6772	1.09894	1.095
NG_012746.1	ZRSR2	-0.0457465	-0.0672765	-1.78877	-1.86143	0.474299	0.10677	-0.402344	-0.823144	0.589865	0.527894	0.10677	0.0444772
NG_012748.1	ALDH1L2	1.17892	1.17259	-1.46876	-1.49763	-1.47289	-0.16898	-0.776469	-0.82265	1.49942	1.45166	-0.16898	-0.207778
NG_012771.2	TAF1	-0.0140686	-0.0048726	-1.74293	-1.74682	-0.963246	-1.18455	0.267858	-0.822629	1.5648	1.52127	-1.18455	-1.19921
NG_012797.1	MBTPS2	-1.02645	-1.03089	0.353691	0.34065	-1.03941	2.62329	-0.196918	-0.82163	1.06159	1.04977	2.62329	2.63563
NG_012798.1	SCN9A	0.606896	0.603807	0.46599	0.435269	-0.881572	0.460617	-0.290448	-0.820487	0.268229	0.2327	0.460617	0.424662
NG_012804.1	MANBA	-1.02373	-1.00355	-1.67483	-1.67176	1.3596	-0.117598	1.87031	-0.818446	-0.130632	-0.149656	-0.117598	-0.133409
NG_012807.1	ST3GAL5	1.10169	1.10859	-1.83227	-1.85243	1.07142	1.41002	1.33118	-0.817059	1.42057	1.4064	1.41002	1.39849
NG_012820.1	ANK1	NA	NA	NA	NA	NA	NA	NA	NA	NA	NA	NA	NA
NG_012826.1	CHD2	NA	0.449772	NA	-0.604036	0.453384	NA	0.759051	NA	NA	0.360405	NA	-0.134662
NG_012827.1	CNTN4	1.7459	1.7528	-0.209364	-0.229056	0.616606	1.35091	-0.617164	-0.815959	0.267278	0.234951	1.35091	1.31888
NG_012829.2	DCDC2	NA	NA	NA	NA	NA	NA	NA	NA	NA	NA	NA	NA
NG_012830.2	DDX3X	-1.67469	-1.67171	1.10444	1.08902	0.656322	0.475873	0.714082	-0.813915	-0.652573	-0.674778	0.475873	0.456346
NG_012835.2	GABRA2	NA	NA	NA	NA	NA	NA	NA	NA	NA	NA	NA	NA
NG_012836.1	GABRB3	NA	NA	NA	NA	NA	NA	NA	NA	NA	NA	NA	NA
NG_012838.2	GPI	NA	1.19496	NA	NA	0.96767	NA	-0.0776	NA	NA	NA	NA	NA
NG_012839.1	GRM1	0.550002	0.579474	-0.420401	-0.457723	-2.08418	0.156177	0.950929	-0.813552	0.229103	0.181374	0.156177	0.114627
NG_012840.1	HS6ST2	-0.407484	-0.393946	0.375743	0.352118	-1.48308	1.21516	0.0274096	-0.809604	0.164171	0.131085	1.21516	1.18017
NG_012842.2	KCNK9	0.659732	0.684309	-1.11709	-1.14218	-1.37868	0.341517	-0.00111245	-0.808067	1.3117	1.30607	0.341517	0.328074
NG_012843.2	LPIN1	NA	NA	NA	NA	NA	NA	NA	NA	NA	NA	NA	NA
NG_012844.1	MAGED2	-1.13363	-1.11196	-0.271854	-0.279668	-0.43204	-0.511284	2.42161	-0.805961	-0.630166	-0.643124	-0.511284	-0.522091
NG_012846.1	MATR3	-0.438828	-0.435127	-1.6354	-1.65942	-0.703652	0.506897	0.939336	-0.805585	0.980215	0.97021	0.506897	0.495611
NG_012849.2	PIK3R1	NA	NA	NA	NA	NA	NA	NA	NA	NA	NA	NA	NA
NG_012850.1	SLC25A14	-1.27452	-1.26032	1.63529	1.61242	-0.784194	0.134074	1.76256	-0.804568	0.195155	0.170151	0.134074	0.112621
NG_012851.2	SLC7A7	NA	NA	NA	NA	NA	NA	NA	NA	NA	NA	NA	NA
NG_012855.1	SYNE1	-0.168793	-0.157747	-2.27692	-2.29317	-0.103896	0.419699	0.23266	-0.802947	0.953328	0.928695	0.419699	0.398465
NG_012857.1	TRIOBP	2.15963	2.15562	-0.788306	-0.824633	0.545941	-1.28055	0.504598	-0.798171	-0.77117	-0.820866	-1.28055	-1.32752
NG_012872.1	GSN	-0.368254	-0.355057	-1.39586	-1.39872	1.29729	-0.695863	0.386615	-0.796217	1.04157	1.02389	-0.695863	-0.704917
NG_012875.3	MKRN3	-0.364779	-0.361213	1.99745	1.96006	-1.05504	0.03268	-0.812597	-0.786231	-0.709505	-0.747524	0.03268	-0.00393913
NG_012877.2	PPOX	NA	NA	NA	NA	NA	NA	NA	NA	NA	NA	NA	NA
NG_012881.1	SOX6	-0.294804	-0.244927	-1.98955	-1.98179	0.597925	-0.668397	-0.147082	-0.778107	1.01942	0.927494	-0.668397	-0.708855
NG_012883.2	KIFAP3	0.754649	0.777674	0.76773	0.756265	-0.493325	0.935511	-0.816732	-0.773804	-0.234327	-0.259887	0.935511	0.919883
NG_012884.2	DNASE1L1	0.822607	0.827949	-1.82498	-1.83027	1.47322	0.569711	1.44874	-0.773643	-0.755763	-0.770418	0.569711	0.552793
NG_012922.1	GSK3B	NA	NA	NA	NA	NA	NA	NA	NA	NA	NA	NA	NA
NG_012925.1	MYO5B	NA	NA	NA	NA	NA	NA	NA	NA	NA	NA	NA	NA
NG_012958.1	SNRPN	NA	NA	NA	NA	NA	NA	NA	NA	NA	NA	NA	NA
NG_012964.1	KRIT1	NA	NA	NA	NA	NA	NA	NA	NA	NA	NA	NA	NA
NG_012965.1	PRICKLE1	0.409679	0.420092	-0.951568	-0.968017	-0.922915	0.992691	1.23932	-0.773547	1.48012	1.4616	0.992691	0.976092
NG_012969.1	FTO	NA	NA	NA	NA	NA	NA	NA	NA	NA	NA	NA	NA
NG_012971.1	KIRREL3	1.3188	1.33042	0.902379	0.87679	0.0653219	-0.205555	0.781856	-0.773377	0.300428	0.272548	-0.205555	-0.223233
NG_012989.1	PEG3	NA	NA	NA	NA	NA	NA	NA	NA	NA	NA	NA	NA
NG_013009.1	EMX2	NA	NA	NA	NA	NA	NA	NA	NA	NA	NA	NA	NA
NG_013010.1	GLUD1	NA	NA	NA	NA	NA	NA	NA	NA	NA	NA	NA	NA
NG_013012.1	IDE	-0.836586	-0.830024	-0.313609	-0.336464	-0.586892	-0.835738	1.74286	-0.771772	0.384229	0.349525	-0.835738	-0.861346
NG_013013.2	SMAD4	0.824844	0.850433	1.6427	1.62752	0.259438	0.128365	0.409075	-0.77151	0.512884	0.471785	0.128365	0.0903566
NG_013017.1	PITPNA	-0.65078	-0.631239	-1.27606	-1.27947	-0.908103	-0.743174	1.68584	-0.771359	-0.445947	-0.463218	-0.743174	-0.755203
NG_013021.1	RGS9	NA	NA	NA	NA	NA	NA	NA	NA	NA	NA	NA	NA
NG_013030.1	RAP1GAP2	0.297521	0.306095	-2.47847	-2.48418	-0.880005	-1.34171	0.614185	-0.767901	0.452338	0.426113	-1.34171	-1.3573
NG_013033.1	PDSS2	0.618645	0.618224	-1.64022	-1.64408	-0.024979	1.53399	0.629871	-0.766867	0.698562	0.657788	1.53399	1.48722
NG_013035.1	CC2D2A	-0.0334639	-0.0327825	-1.77628	-1.7853	-0.0357209	0.844824	0.0680702	-0.765595	0.696826	0.655765	0.844824	0.805409
NG_013036.1	NPAS3	-0.13373	-0.128352	0.542439	0.513233	1.08606	-1.33509	0.477028	-0.761912	1.39633	1.35209	-1.33509	-1.35841
NG_013037.1	REEP1	NA	NA	NA	NA	NA	NA	NA	NA	NA	NA	NA	NA
NG_013068.1	MYO9B	0.436235	0.443589	-1.53707	-1.55969	0.671967	-1.25889	0.80502	-0.761705	-0.235173	-0.259019	-1.25889	-1.28447
NG_013071.1	FXYD6	NA	NA	NA	NA	NA	NA	NA	NA	NA	NA	NA	NA
NG_013080.1	TF	0.685234	0.690556	1.7029	1.68672	-1.08996	0.195753	-0.619987	-0.761455	-0.260789	-0.279103	0.195753	0.178934
NG_013083.1	NECTIN1	0.546556	0.55526	-2.86539	-2.88869	-0.26384	0.166592	0.103182	-0.760745	0.228462	0.204391	0.166592	0.145521
NG_013210.1	ASPH	NA	NA	NA	NA	NA	NA	NA	NA	NA	NA	NA	NA
NG_013224.2	ATP7A	NA	NA	NA	NA	NA	NA	NA	NA	NA	NA	NA	NA
NG_013249.1	TENM1	1.02672	1.0308	-0.509332	-0.535378	-1.00054	-1.18537	-0.271666	-0.760424	-1.25236	-1.28377	-1.18537	-1.21243
NG_013258.1	PABPC1P3	0.258236	0.263894	0.475255	0.464216	0.243067	0.17499	0.170458	-0.75978	0.158059	0.142762	0.17499	0.161693
NG_013302.2	CTNNB1	0.649323	0.663695	0.94816	0.942452	-1.68882	0.847405	-0.358882	-0.757023	1.05636	1.04299	0.847405	0.835754
NG_013306.1	SLC46A1	-0.126066	-0.120853	-0.314427	-0.325958	1.10003	0.603189	-0.498716	-0.756177	-1.3588	-1.37418	0.603189	0.585519
NG_013325.2	MAPK10	0.181686	0.186591	-1.8103	-1.81799	-0.563923	0.821484	0.973231	-0.756123	0.759792	0.723122	0.821484	0.787803
NG_013337.1	APBB2	NA	NA	NA	NA	NA	NA	NA	NA	NA	NA	NA	NA
NG_013341.2	DCC	NA	NA	NA	NA	NA	NA	NA	NA	NA	NA	NA	NA
NG_013344.1	EPB41	NA	NA	NA	NA	NA	NA	NA	NA	NA	NA	NA	NA
NG_013347.2	GLUL	NA	NA	NA	NA	NA	NA	NA	NA	NA	NA	NA	NA
NG_013350.1	NR3C2	-0.495644	-0.495439	-1.59273	-1.62215	-0.0712214	-1.00186	0.760063	-0.750694	-0.899485	-0.932219	-1.00186	-1.03234
NG_013355.1	NDUFV2	-1.5444	-1.55051	-1.27945	-1.31055	-1.71176	0.709877	0.636358	-0.747307	0.899007	0.875426	0.709877	0.688261
NG_013368.1	PDHX	NA	NA	NA	NA	NA	NA	NA	NA	NA	NA	NA	NA
NG_013369.1	PTCH2	-0.468198	-0.464269	-0.41218	-0.436169	2.0088	1.431	0.962048	-0.74457	-1.20835	-1.2424	1.431	1.40613
NG_013373.1	NRG3	0.760481	0.756473	0.169151	0.142578	0.263914	1.56692	-0.240275	-0.740959	2.10331	2.04468	1.56692	1.51832
NG_013376.1	PALLD	NA	NA	NA	NA	NA	NA	NA	NA	NA	NA	NA	NA
NG_013377.1	CLCF1	0.538424	0.546047	-0.855723	-0.880387	0.1587	-0.37125	0.255823	-0.737205	-0.169762	-0.203925	-0.37125	-0.401607
NG_015798.1	LEF1	1.09601	1.10112	0.35796	0.336518	-1.44007	-1.20005	0.913418	-0.731987	2.25013	2.21005	-1.20005	-1.22466
NG_015800.1	NT5C3A	0.983996	0.994477	-1.46086	-1.46441	-0.933626	-0.614632	0.53699	-0.728128	1.38228	1.36007	-0.614632	-0.626473
NG_015801.1	MEX3C	1.6662	1.68482	-0.209616	-0.242293	-1.13346	-1.17018	-0.328051	-0.726448	-0.412563	-0.4568	-1.17018	-1.22682
NG_015803.1	PPP1R9A	1.0882	1.08711	-0.196627	-0.214721	0.329834	-1.02363	-0.435783	-0.725654	0.148156	0.121036	-1.02363	-1.04229
NG_015811.1	NDUFAF5	NA	NA	NA	NA	NA	NA	NA	NA	NA	NA	NA	NA
NG_015813.1	KIAA1109	2.12559	2.14362	-0.191684	-0.21192	-0.662123	-0.159774	-0.332438	-0.725195	0.793932	0.768706	-0.159774	-0.185387
NG_015815.1	ZNF397	NA	NA	NA	NA	NA	NA	NA	NA	NA	NA	NA	NA
NG_015817.1	STRADA	0.217731	0.224354	0.156732	0.126168	0.105273	0.276139	0.445346	-0.724694	0.651302	0.604457	0.276139	0.237335
NG_015820.1	CHMP4B	NA	NA	NA	NA	NA	NA	NA	NA	NA	NA	NA	NA
NG_015822.2	LCORL	NA	NA	NA	NA	NA	NA	NA	NA	NA	NA	NA	NA
NG_015823.1	GLRB	1.36185	1.39548	1.46367	1.45669	1.1267	1.29524	1.24776	-0.723252	1.38954	1.37552	1.29524	1.28354
NG_015830.1	IRS1	-0.492668	-0.471407	-0.866297	NA	-2.15741	0.955742	-0.339707	-0.723216	0.0348847	NA	0.955742	NA
NG_015831.2	LEPR	NA	NA	NA	NA	NA	NA	NA	NA	NA	NA	NA	NA
NG_015833.1	RB1CC1	NA	NA	NA	NA	NA	NA	NA	NA	NA	NA	NA	NA
NG_015837.1	AURKAP1	NA	NA	NA	NA	NA	NA	NA	NA	NA	NA	NA	NA
NG_015841.1	TPM4	0.437366	0.448581	0.777513	0.75442	0.292949	-1.26578	0.729571	-0.721535	-0.920829	-0.936036	-1.26578	-1.27316
NG_015843.1	XYLT1	-0.804139	-0.80555	-0.762779	-0.805292	-0.544007	0.551399	-1.19158	-0.71962	0.0769429	0.0188978	0.551399	0.498583
NG_015848.1	CSTF2	-1.09155	-1.09268	-1.31263	-1.33819	-0.95638	0.990483	0.93376	-0.718495	-0.762258	-0.790388	0.990483	0.979908
NG_015849.1	DLG3	-1.16639	-1.15491	-0.0802414	-0.0912358	0.0820659	1.65956	0.862	-0.717392	1.87877	1.86784	1.65956	1.65065
NG_015851.1	HDAC8	-0.400384	-0.379187	-1.66824	-1.67242	0.0858675	0.383333	0.847015	-0.707258	1.15111	1.092	0.383333	0.340906
NG_015864.1	EIF2B3	NA	NA	NA	NA	NA	NA	NA	NA	NA	NA	NA	NA
NG_015874.1	NLGN3	0.773284	0.777689	-0.670363	-0.700997	-0.0960028	0.787005	-1.20168	-0.704976	1.28442	1.25104	0.787005	0.755871
NG_015875.1	OGT	0.736368	0.741724	0.692656	0.676286	-1.47966	0.813564	-1.18702	-0.704	1.04513	1.02041	0.813564	0.792877
NG_015886.1	ZIC1	0.185794	0.197041	-0.937297	NA	0.993237	0.757108	0.878861	-0.703776	-0.819588	NA	0.757108	NA
NG_015888.1	CDK6	NA	NA	NA	NA	NA	NA	NA	NA	NA	NA	NA	NA
NG_015890.1	SLC1A3	-0.664529	-0.66426	1.05902	1.05982	1.56598	1.72372	1.40468	-0.703675	1.66467	1.66628	1.72372	1.72841
NG_015892.1	BSN	-0.138453	-0.110698	-2.11662	-2.18687	-1.01987	0.668874	-0.521687	-0.700397	0.716124	0.640493	0.668874	0.602942
NG_015895.1	FHL1	NA	NA	NA	NA	NA	NA	NA	NA	NA	NA	NA	NA
NG_015966.1	GPR173	-1.22861	-1.20968	-0.248608	-0.281861	-0.91451	0.428007	1.39384	-0.695361	1.40808	1.37436	0.428007	0.391132
NG_015979.1	NOS1AP	NA	NA	NA	NA	NA	NA	NA	NA	NA	NA	NA	NA
NG_015996.1	DIP2A	NA	NA	NA	NA	NA	NA	NA	NA	NA	NA	NA	NA
NG_015998.1	DLC1	1.4105	1.39923	-2.12706	-2.14093	-0.671433	-0.889691	0.253651	-0.695121	-0.174716	-0.212079	-0.889691	-0.918134
NG_016002.2	GNAI2	0.705365	0.714143	0.383636	0.364621	0.979378	0.533129	0.620309	-0.693874	1.0896	1.05888	0.533129	0.508096
NG_016012.1	LMBRD1	-0.239783	-0.228015	-1.79904	-1.82404	0.228535	1.09335	0.682323	-0.690662	1.16474	1.15305	1.09335	1.08404
NG_016020.1	PITPNM3	NA	NA	NA	NA	NA	NA	NA	NA	NA	NA	NA	NA
NG_016022.1	POU6F2	1.76123	1.76487	-0.183214	-0.211545	-1.07355	-1.19363	-0.671165	-0.690268	-0.440846	-0.47838	-1.19363	-1.23465
NG_016137.1	SYNGAP1	1.0599	1.10999	-1.16825	-1.25929	1.61779	1.64578	-0.292349	-0.68684	-1.09514	-1.20957	1.64578	1.63576
NG_016138.1	DARS2	-0.186451	-0.17482	-0.853684	-0.873763	1.13988	1.61238	-0.232518	-0.686407	0.0211621	-0.00183508	1.61238	1.60349
NG_016144.1	ITPR1	1.17108	1.1815	-1.35612	-1.38529	-0.721777	1.52995	1.1936	-0.686252	-0.431961	-0.456825	1.52995	1.52657
NG_016150.1	SPTBN2	1.17339	1.18407	-2.05388	-2.04407	0.165132	0.377458	0.149529	-0.686247	0.917063	0.933385	0.377458	0.393623
NG_016171.1	GAB2	1.71061	1.71209	-0.897763	-0.909624	0.232516	0.877942	-0.343538	-0.685034	0.587906	0.561644	0.877942	0.853611
NG_016193.1	HLCS	1.47233	1.4859	-1.18113	-1.20335	1.50634	1.79063	0.761994	-0.68414	-0.234808	-0.264558	1.79063	1.77124
NG_016194.1	GNAS	-0.48592	-0.473321	-0.841665	-0.854036	1.08923	-0.298748	0.333157	-0.683623	1.18463	1.17731	-0.298748	-0.311899
NG_016195.1	CACNB2	NA	NA	NA	NA	NA	NA	NA	NA	NA	NA	NA	NA
NG_016198.1	ME2	1.17958	1.17826	-1.41667	-1.4204	-0.908957	-0.720745	1.18858	-0.680472	0.237175	0.214231	-0.720745	-0.734216
NG_016201.1	RREB1	0.0722315	0.0919026	-1.80105	-1.78373	-1.61091	-0.238456	0.314758	-0.680084	-0.0832418	-0.0995078	-0.238456	-0.248861
NG_016206.1	KIAA0319	0.665481	0.682809	1.00145	1.00169	-0.311786	1.72747	-0.871326	-0.67862	1.30141	1.2982	1.72747	1.73156
NG_016207.1	SLC35A1	0.0479707	0.056706	0.0357954	0.0174795	0.436075	0.670053	0.546785	-0.67827	0.719235	0.686673	0.670053	0.641308
NG_016209.1	RIMS1	-0.171074	-0.156069	-0.748502	-0.768553	0.851561	0.611601	0.57046	-0.675075	0.476559	0.446612	0.611601	0.586022
NG_016210.1	LEMD3	-1.22057	-1.19613	0.721252	0.69718	1.20886	-0.770152	-0.944009	-0.673826	1.07246	1.0361	-0.770152	-0.782861
NG_016212.1	ATXN10	NA	NA	NA	NA	NA	NA	NA	NA	NA	NA	NA	NA
NG_016215.1	CADPS2	0.525495	0.535259	-1.6987	-1.71355	0.550793	-0.116605	1.13358	-0.672379	1.25346	1.21749	-0.116605	-0.143491
NG_016227.1	COA3	-0.887703	-0.88135	1.02632	1.01864	-0.708375	0.758341	1.08126	-0.669198	1.46973	1.45792	0.758341	0.744974
NG_016238.1	ALG13	0.502983	0.514745	-1.06235	-1.074	-0.950782	0.784864	-1.33706	-0.666088	1.08169	1.04465	0.784864	0.75378
NG_016249.1	UBQLN2	0.276965	0.30784	-1.26357	-1.33644	-0.167984	1.34673	0.732974	-0.665782	1.30812	1.28328	1.34673	1.33139
NG_016255.2	CCDC120	1.20383	1.19128	-1.28156	-1.26513	0.199686	-0.660659	-0.801598	-0.662992	0.568515	0.542148	-0.660659	-0.660893
NG_016256.1	TCEAL8	-0.449129	-0.443468	0.419836	0.411538	1.51965	1.93775	-0.96702	-0.660687	-1.41753	-1.43903	1.93775	1.93241
NG_016260.1	KDM6A	NA	NA	NA	NA	NA	NA	NA	NA	NA	NA	NA	NA
NG_016261.2	HUWE1	-0.508614	-0.496615	-1.43154	-1.43729	-0.561241	-2.07527	0.403847	-0.659133	1.21697	1.18554	-2.07527	-2.08099
NG_016263.2	GRIPAP1	NA	NA	NA	NA	NA	NA	NA	NA	NA	NA	NA	NA
NG_016266.1	CNKSR2	1.4485	1.4584	-0.530511	-0.553231	0.690551	0.168065	0.986232	-0.657836	-1.44233	-1.47812	0.168065	0.14032
NG_016267.1	TXLNG	-0.975283	-0.979873	-1.69147	-1.72847	-0.506443	1.0798	-0.949286	-0.657279	1.05403	1.0469	1.0798	1.07579
NG_016269.1	AK2	1.02032	1.10224	-0.634079	-0.710011	0.961712	0.710061	1.66535	-0.654615	0.97634	0.949704	0.710061	0.680446
NG_016272.1	FGF9	0.856194	0.873977	-0.231825	-0.248934	1.16845	0.638493	0.724243	-0.653796	1.07543	1.06255	0.638493	0.624726
NG_016277.1	STIM1	0.637375	0.640297	-1.68272	-1.68048	-1.52974	-0.799346	0.470645	-0.649319	0.94702	0.918295	-0.799346	-0.80967
NG_016283.1	SCN3B	NA	0.465512	NA	0.337588	-0.738519	NA	-0.605355	NA	NA	0.868582	NA	0.366119
NG_016287.1	ADAMTS17	0.156727	0.166073	-0.489769	-0.520957	0.505564	1.45851	-0.449339	-0.648758	0.769011	0.724097	1.45851	1.41852
NG_016293.1	VRK1	1.39129	1.38804	-1.65822	-1.66258	-0.767563	-0.4849	0.999939	-0.647886	1.53155	1.49114	-0.4849	-0.504581
NG_016295.1	CCM2	-1.13129	-1.12547	1.57525	1.57669	1.09323	0.940602	-0.518889	-0.647399	0.938951	0.925233	0.940602	0.93057
NG_016297.2	TFE3	NA	NA	NA	NA	NA	NA	NA	NA	NA	NA	NA	NA
NG_016311.1	DICER1	1.00008	1.00641	-0.593854	-0.615588	-0.125554	-0.305887	-0.593256	-0.64497	0.165972	0.137705	-0.305887	-0.331701
NG_016313.1	AFF2	-1.37741	-1.38472	-0.504155	-0.568975	0.554456	-0.860737	0.503934	-0.644175	-2.26904	-2.37108	-0.860737	-0.942338
NG_016315.2	TCEAL4	0.45054	0.456647	0.925886	0.907466	-1.28778	0.464421	0.693394	-0.641645	0.579647	0.55756	0.464421	0.445571
NG_016325.1	MED14	NA	NA	NA	NA	NA	NA	NA	NA	NA	NA	NA	NA
NG_016328.1	PIN4	-1.17483	-1.16823	-0.518308	-0.534366	1.75243	1.1551	-1.26104	-0.640313	0.190352	0.166981	1.1551	1.13796
NG_016330.2	ZMAT1	-0.309931	-0.295619	-2.48423	-2.54097	1.33117	0.291785	0.78169	-0.638085	0.658822	0.6174	0.291785	0.252735
NG_016335.1	ADAM9	2.18663	2.17447	-0.17324	-0.189507	-0.459909	-0.357492	0.139435	-0.636212	-0.721377	-0.7409	-0.357492	-0.377157
NG_016339.1	ARAF	0.771697	0.779581	-1.76038	-1.77533	-1.23887	0.68706	-1.01126	-0.63435	0.906519	0.884371	0.68706	0.668107
NG_016361.1	CDR1	NA	NA	NA	NA	NA	NA	NA	NA	NA	NA	NA	NA
NG_016363.1	TERC	0.554992	0.567494	-0.728836	-0.771875	0.16541	0.316966	0.175239	-0.634335	2.11454	2.06645	0.316966	0.26861
NG_016369.1	LAS1L	NA	NA	NA	NA	NA	NA	NA	NA	NA	NA	NA	NA
NG_016376.1	CXorf38	1.45231	1.45809	1.48005	1.46031	1.12284	-0.984304	0.724248	-0.633351	1.32971	1.30125	-0.984304	-1.00338
NG_016385.1	RBM41	-0.361336	-0.353885	-0.326399	-0.351083	-0.142829	1.36412	1.08709	-0.633317	-1.14092	-1.17161	1.36412	1.32252
NG_016391.2	GLIS2	NA	NA	NA	NA	NA	NA	NA	NA	NA	NA	NA	NA
NG_016403.1	DRP2	NA	NA	NA	NA	NA	NA	NA	NA	NA	NA	NA	NA
NG_016419.1	FRMPD4	-0.551892	-0.538247	-1.00868	-1.03011	0.703393	-0.582218	-0.624194	-0.627856	-1.10944	-1.14198	-0.582218	-0.609118
NG_016422.1	CLCN2	1.27917	1.29499	-2.11543	-2.14831	-0.94336	0.537202	1.22489	-0.627353	0.867362	0.856551	0.537202	0.526176
NG_016423.1	DYNC2H1	-0.574609	-0.570299	-1.03586	-1.06129	-0.54152	1.44221	1.65594	-0.626699	0.471714	0.450508	1.44221	1.43198
NG_016424.1	EIF2AK3	-0.997491	-0.990948	1.4742	1.46182	-0.958417	1.472	-0.713362	-0.62556	-0.303849	-0.331691	1.472	1.45449
NG_016426.1	GABBR2	-1.03515	-1.03114	-1.49781	-1.51435	0.233984	0.876661	0.711489	-0.625528	1.01548	0.991536	0.876661	0.855402
NG_016431.1	ZEB2	0.262523	0.276928	0.709478	0.681437	0.743135	0.949739	0.566285	-0.621262	1.39188	1.35468	0.949739	0.914559
NG_016437.1	LTBP3	1.10168	1.08463	-0.747094	-0.75006	-1.06369	0.943276	0.952422	-0.620879	0.843318	0.807427	0.943276	0.907885
NG_016439.1	MCF2	-0.68898	-0.679041	0.261274	0.235438	2.15132	0.0838196	-0.98404	-0.617925	0.300897	0.265622	0.0838196	0.0541279
NG_016440.1	MAF	0.285493	0.312447	-2.063	-2.16425	0.43569	0.840025	0.755504	-0.614441	1.28358	1.25006	0.840025	0.803472
NG_016443.2	MEF2A	NA	NA	NA	NA	NA	NA	NA	NA	NA	NA	NA	NA
NG_016469.1	AMMECR1	-0.763572	-0.728458	-0.727131	-0.759145	-0.522966	0.646559	0.855289	-0.611853	0.584197	0.505472	0.646559	0.574955
NG_016478.2	TRAPPC9	NA	NA	NA	NA	NA	NA	NA	NA	NA	NA	NA	NA
NG_016545.1	BTBD9	-1.11411	-1.0981	0.0156658	-0.00777762	0.147629	0.704382	1.58772	-0.610739	0.0406203	0.00526742	0.704382	0.666771
NG_016550.1	ATP11C	-0.404334	-0.395686	-0.0281007	-0.0527084	-1.30667	1.49205	1.56095	-0.610439	2.16202	2.1034	1.49205	1.44465
NG_016567.1	MTMR8	0.609288	0.624986	-0.0293554	-0.0331933	-0.0192841	0.992014	0.205952	-0.610058	0.598784	0.590388	0.992014	0.986927
NG_016598.1	PHKB	-1.20326	-1.20171	0.671599	0.658684	-1.58448	1.39216	0.692002	-0.609201	1.41442	1.397	1.39216	1.37774
NG_016599.1	PHKA1	0.0428245	0.0509489	0.00534988	-0.0175516	-0.487056	2.39503	-1.06963	-0.608593	0.846893	0.812858	2.39503	2.36235
NG_016606.1	GPD2	0.425119	0.431576	-1.75979	-1.77134	1.06997	1.06703	1.27441	-0.60858	-1.03537	-1.05265	1.06703	1.052
NG_016607.1	MSH3	0.855277	0.859279	-1.17969	-1.20111	-0.656449	0.923749	0.515611	-0.608481	0.526739	0.484616	0.923749	0.884276
NG_016620.1	SCAI	-0.377847	-0.394431	-0.0371368	-0.162346	-0.0731157	-0.0505915	-0.902184	-0.608456	0.618875	0.452259	-0.0505915	-0.199083
NG_016623.1	STXBP1	0.0994743	0.118302	-0.245529	-0.289296	-0.78259	-0.0285116	0.447898	-0.605113	0.453905	0.400912	-0.0285116	-0.0806821
NG_016644.2	RETREG1	NA	NA	NA	NA	NA	NA	NA	NA	NA	NA	NA	NA
NG_016647.1	TP53INP1	0.707561	0.715351	2.3038	2.27018	-0.423463	1.08054	-0.766507	-0.600282	-0.495458	-0.546346	1.08054	1.03696
NG_016702.1	CYGB	-1.0231	-1.00474	1.13079	1.0976	-1.51694	-1.13938	0.324424	-0.597418	0.644638	0.606425	-1.13938	-1.1557
NG_016711.1	ARHGAP26	0.591368	0.591394	-0.973543	-0.9871	-1.02378	1.22043	-0.382945	-0.59298	1.02733	0.991929	1.22043	1.18672
NG_016712.1	WWC1	-0.140803	-0.138029	-1.0984	-1.11765	-0.589448	1.42928	-0.664275	-0.591402	-0.0204225	-0.0474595	1.42928	1.40376
NG_016715.1	TUBB2B	NA	NA	NA	NA	NA	NA	NA	NA	NA	NA	NA	NA
NG_016742.1	KCNJ13	-0.191334	-0.173623	-0.508141	-0.547843	0.3504	0.76649	0.865423	-0.590356	-0.189591	-0.246453	0.76649	0.717006
NG_016746.1	YTHDF2	NA	NA	NA	NA	NA	NA	NA	NA	NA	NA	NA	NA
NG_016747.1	PPARGC1B	-0.646386	-0.631079	2.03913	2.00411	0.0228877	-0.785637	0.931175	-0.589738	-0.623373	-0.646019	-0.785637	-0.803637
NG_016753.1	NR2F2	-1.37798	-1.4133	-0.570428	-0.607354	-1.37174	1.89275	2.40946	-0.58758	-0.0209359	-0.0486037	1.89275	1.9416
NG_016754.1	GPR34	-1.33552	-1.31908	-1.23639	-1.24899	0.909325	0.994053	-0.758067	-0.584895	-0.120609	-0.147449	0.994053	0.964547
NG_016757.1	CLEC16A	NA	NA	NA	NA	NA	NA	NA	NA	NA	NA	NA	NA
NG_016758.1	EHBP1	NA	NA	NA	NA	NA	NA	NA	NA	NA	NA	NA	NA
NG_016760.1	EFHC1	-0.0223216	-0.018601	0.94739	0.928624	0.136058	0.36798	0.873724	-0.583653	1.0252	0.999747	0.36798	0.34701
NG_016798.1	POLA1	1.07791	1.08517	-0.385275	-0.408599	0.393764	-1.24647	1.76835	-0.580493	-1.20863	-1.24181	-1.24647	-1.27651
NG_016807.2	KCNN3	NA	NA	NA	NA	NA	NA	NA	NA	NA	NA	NA	NA
NG_016810.1	NCOA3	NA	NA	NA	NA	NA	NA	NA	NA	NA	NA	NA	NA
NG_016853.2	MEG3	NA	NA	NA	NA	NA	NA	NA	NA	NA	NA	NA	NA
NG_016864.1	CRBN	-0.868945	-0.868928	-0.0744558	-0.086731	1.12126	1.19852	1.4156	-0.579052	1.58263	1.57941	1.19852	1.19421
NG_016932.2	LPP	NA	NA	NA	NA	NA	NA	NA	NA	NA	NA	NA	NA
NG_016965.1	FKBP1AP2	0.89875	0.894248	-1.39152	-1.39754	-0.308787	-0.436709	-0.388821	-0.578746	-0.111866	-0.135775	-0.436709	-0.455008
NG_016966.1	PGM1	0.377379	0.379108	-0.477771	-0.50812	1.73638	0.163582	1.87339	-0.578708	-0.489775	-0.527742	0.163582	0.133452
NG_016970.1	TRIP11	NA	NA	NA	NA	NA	NA	NA	NA	NA	NA	NA	NA
NG_016971.1	TSFM	NA	NA	NA	NA	NA	NA	NA	NA	NA	NA	NA	NA
NG_016972.1	RAB3GAP1	0.802639	0.810403	-0.337816	-0.356173	0.3708	0.937433	-0.470252	-0.575435	0.897842	0.8606	0.937433	0.903834
NG_016974.1	TTLL5	1.69771	1.66629	-0.903885	-0.865154	-0.184637	-1.14534	1.23263	-0.569214	-0.0313261	-0.032232	-1.14534	-1.10256
NG_016975.1	ARHGEF9	1.56773	1.59115	-0.073937	-0.109471	-0.804062	-1.0075	1.85887	-0.568541	-0.522974	-0.574938	-1.0075	-1.06072
NG_016976.1	SATB2	NA	NA	NA	NA	NA	NA	NA	NA	NA	NA	NA	NA
NG_016977.1	INHA	1.27173	1.27959	-0.308027	-0.332257	-0.941612	0.708467	1.23108	-0.563574	-0.28408	-0.315579	0.708467	0.682661
NG_016981.1	INTS9	NA	NA	NA	NA	NA	NA	NA	NA	NA	NA	NA	NA
NG_016983.1	KLHL7	1.20611	1.2058	-2.01011	-2.00804	0.999271	-0.469995	1.20675	-0.561529	-0.442183	-0.460592	-0.469995	-0.485027
NG_016984.2	MYH7B	1.47694	1.48373	-0.619065	-0.645883	-0.601973	-1.05402	-0.285205	-0.561388	0.0731381	0.0410364	-1.05402	-1.08837
NG_016989.2	MPLKIP	NA	NA	NA	NA	NA	NA	NA	NA	NA	NA	NA	NA
NG_017003.1	MBD5	-0.612269	-0.584471	-0.274865	-0.284032	0.00882487	-1.2186	-0.300723	-0.556664	-0.780068	-0.79239	-1.2186	-1.22195
NG_017044.1	SLC1A1	NA	NA	NA	NA	NA	NA	NA	NA	NA	NA	NA	NA
NG_017048.1	ZEB1	-0.211921	-0.200743	-1.13647	-1.15035	0.291638	1.63743	0.2441	-0.556429	2.11896	2.0676	1.63743	1.59421
NG_017058.1	RRAS2	-0.595358	-0.568816	-0.464501	-0.479644	0.775028	-0.955401	0.505493	-0.556349	-0.590339	-0.615351	-0.955401	-0.971473
NG_017060.1	PNKD	1.09761	1.09617	0.698917	0.685972	-1.02085	-0.77146	-0.621466	-0.552097	-0.525987	-0.535441	-0.77146	-0.776505
NG_017061.1	KIFBP	NA	NA	NA	NA	NA	NA	NA	NA	NA	NA	NA	NA
NG_017062.1	HIBCH	NA	NA	NA	NA	NA	NA	NA	NA	NA	NA	NA	NA
NG_017067.1	KIF21A	0.899375	0.89769	-1.3736	-1.38365	-1.08281	1.02077	-0.559273	-0.5515	1.24465	1.22144	1.02077	1.00062
NG_017068.1	MTMR14	1.26084	1.26937	-1.75278	-1.76344	-0.656431	0.977888	-0.154327	-0.550677	1.17758	1.15947	0.977888	0.962714
NG_017071.1	NAA25	0.469132	0.469476	0.714016	0.690605	-0.061747	-0.414464	-0.771691	-0.549163	1.00958	0.977776	-0.414464	-0.437938
NG_017075.1	ZFYVE27	NA	NA	NA	NA	NA	NA	NA	NA	NA	NA	NA	NA
NG_017077.1	SLC9A9	0.514609	0.532867	0.382231	0.36235	0.602033	1.02495	0.779493	-0.549066	-1.37871	-1.42218	1.02495	1.00218
NG_017078.2	RAD52	NA	NA	NA	NA	NA	NA	NA	NA	NA	NA	NA	NA
NG_017091.1	MED25	-0.159843	-0.154429	0.45511	0.449187	1.48203	0.90365	1.77997	-0.546278	-0.810153	-0.845326	0.90365	0.900901
NG_017092.1	NEBL	1.73319	1.72461	-0.355993	-0.384104	1.86463	-0.890653	-0.118112	-0.544312	-0.320023	-0.36	-0.890653	-0.925387
NG_017093.2	MAMLD1	-1.14644	NA	0.0133728	NA	NA	-0.544829	NA	-0.543639	2.08409	NA	-0.544829	NA
NG_017135.1	PRICKLE3	0.892649	0.91279	0.644011	0.63323	-0.199498	0.121428	1.0334	-0.542729	0.0870714	0.0656099	0.121428	0.103843
NG_017155.1	DMXL2	0.476265	0.489068	-2.38953	-2.41597	-0.590885	0.984358	0.802208	-0.541875	-0.688274	-0.715108	0.984358	0.967642
NG_017156.1	FAM118B	0.650998	0.660901	0.19688	0.185138	-0.658267	1.12591	-1.5217	-0.540937	0.16502	0.146095	1.12591	1.11078
NG_017158.1	HDX	NA	NA	NA	NA	NA	NA	NA	NA	NA	NA	NA	NA
NG_017159.1	MOSPD2	-1.68095	-1.70633	1.12876	1.0827	-1.65118	-1.45801	0.704326	-0.537845	-0.876319	-0.934378	-1.45801	-1.5128
NG_017160.1	SLC9A6	NA	NA	NA	NA	NA	NA	NA	NA	NA	NA	NA	NA
NG_017163.1	INO80	NA	NA	NA	NA	NA	NA	NA	NA	NA	NA	NA	NA
NG_017196.2	ARMCX4	-0.150149	-0.130802	-1.37656	-1.41795	1.47503	0.478229	1.76273	-0.537311	0.174714	0.13512	0.478229	0.447801
NG_017198.1	ARHGEF28	1.03174	0.844737	0.987852	0.791309	-0.596304	-1.76771	0.159504	-0.536447	0.598943	0.512833	-1.76771	-1.1406
NG_021151.1	RAD50	-1.13744	-1.12771	-1.01852	-1.03029	-0.102684	-0.34137	-0.865312	-0.5356	1.58007	1.54037	-0.34137	-0.363132
NG_021169.1	NME1	-0.80542	-0.793582	-0.230413	-0.237404	-0.655826	-0.23763	2.58978	-0.534149	-0.191183	-0.206589	-0.23763	-0.249455
NG_021180.2	SCN8A	-0.45582	NA	-1.7495	NA	NA	0.256408	NA	-0.533491	1.38443	NA	0.256408	NA
NG_021182.1	SIX4	NA	NA	NA	-1.09357	NA	NA	NA	NA	NA	0.426548	NA	1.18416
NG_021187.1	TMTC3	NA	NA	NA	NA	NA	NA	NA	NA	NA	NA	NA	NA
NG_021188.1	PIKFYVE	0.416951	0.425183	-1.04736	-1.04849	0.39886	-0.247781	0.353348	-0.53322	0.768413	0.757549	-0.247781	-0.254023
NG_021193.1	IPW	-0.434991	-0.424934	-0.6065	-0.631484	0.888592	0.259579	2.19912	-0.530694	-0.178446	-0.212664	0.259579	0.231222
NG_021195.1	CDKAL1	2.37181	2.35772	0.145561	0.122781	0.178648	-0.892355	-0.237903	-0.530008	0.985495	0.94803	-0.892355	-0.915447
NG_021196.1	DIP2B	0.574915	0.580206	-1.01547	-1.03555	0.640354	1.0457	1.00062	-0.527892	-1.13642	-1.16434	1.0457	1.02963
NG_021208.2	OPRM1	1.75941	1.76405	-1.70306	-1.73575	0.153763	0.408463	0.786295	-0.527793	0.157159	0.115546	0.408463	0.371514
NG_021212.1	WDR35	NA	NA	NA	NA	NA	NA	NA	NA	NA	NA	NA	NA
NG_021215.1	TRPC5	-0.154577	-0.149578	0.496685	0.477983	0.808602	0.467609	-0.166849	-0.525315	1.12316	1.09406	0.467609	0.445172
NG_021227.1	NDUFA1	NA	NA	NA	NA	NA	NA	NA	NA	NA	NA	NA	NA
NG_021242.1	SEMA3E	NA	NA	NA	NA	NA	NA	NA	NA	NA	NA	NA	NA
NG_021244.1	P2RY14	-1.52994	-1.52468	1.1219	1.093	-0.0914331	0.560031	-0.150202	-0.5232	-1.20215	-1.23277	0.560031	0.52674
NG_021249.1	UBA52P2	1.19923	1.18101	-0.114762	-0.129587	0.512364	-1.26462	1.22468	-0.518928	1.39701	1.36654	-1.26462	-1.27678
NG_021253.1	ZFX	0.895816	0.922282	-1.34703	-1.38545	-0.509103	1.79029	1.4044	-0.513972	-0.307503	-0.344288	1.79029	1.78496
NG_021258.1	PJA1	1.38803	1.40676	-0.634562	-0.648224	-0.814773	1.312	1.33012	-0.509949	-0.930258	-0.95155	1.312	1.29152
NG_021259.1	WNK3	NA	NA	NA	NA	NA	NA	NA	NA	NA	NA	NA	NA
NG_021273.1	PPP1R3F	NA	NA	NA	NA	NA	NA	NA	NA	NA	NA	NA	NA
NG_021282.1	NALF2	NA	NA	NA	NA	NA	NA	NA	NA	NA	NA	NA	NA
NG_021300.1	PTCHD1	-0.612398	-0.587507	0.490388	0.463315	1.0491	1.12742	-0.730213	-0.507301	-0.79011	-0.817606	1.12742	1.0855
NG_021302.1	TEAD1	NA	NA	NA	NA	NA	NA	NA	NA	NA	NA	NA	NA
NG_021308.1	PDS5B	0.439891	0.446593	-2.58403	-2.54849	0.317544	-1.59376	0.798701	-0.507072	-0.642526	-0.648109	-1.59376	-1.57995
NG_021316.2	FAM120C	NA	NA	NA	NA	NA	NA	NA	NA	NA	NA	NA	NA
NG_021320.1	CD99L2	-0.123702	-0.121123	-0.402508	-0.416718	-0.587169	1.0891	-0.013326	-0.503354	0.961725	0.94837	1.0891	1.0782
NG_021326.1	BCLAF3	0.404883	0.405373	-0.092189	-0.133882	0.454626	-0.469155	1.56337	-0.50322	-0.279835	-0.333773	-0.469155	-0.516869
NG_021335.1	LRCH1	0.214066	0.223438	0.380104	0.351785	0.0848142	0.816666	0.27656	-0.502582	-0.0649963	-0.102189	0.816666	0.77997
NG_021338.1	SUFU	-1.62511	-1.60148	-0.896531	-0.911607	0.383146	1.15276	-1.22085	-0.502252	1.09765	1.06595	1.15276	1.1244
NG_021344.2	SLITRK4	NA	NA	NA	NA	NA	NA	NA	NA	NA	NA	NA	NA
NG_021353.1	INE1	0.352621	0.36416	-0.623266	-0.6314	-0.444334	0.319152	0.0353004	-0.501238	-0.155109	-0.177326	0.319152	0.296389
NG_021364.1	CFAP251	2.05346	2.03005	0.163598	0.142221	-1.0558	0.379583	0.318014	-0.499151	-1.1157	-1.13328	0.379583	0.350113
NG_021365.1	NKAIN2	-1.8306	-1.70175	-1.92307	-1.85091	-0.667928	-0.694044	-0.121237	-0.495989	0.45677	0.40685	-0.694044	-0.686732
NG_021367.1	SH3KBP1	NA	NA	NA	NA	NA	NA	NA	NA	NA	NA	NA	NA
NG_021368.1	WDR44	-1.20407	-1.186	-1.32966	-1.35289	-0.456781	-1.15268	0.603317	-0.49523	-0.332115	-0.370943	-1.15268	-1.18421
NG_021375.1	DLG2	0.493243	0.495187	-1.14818	-1.15587	-0.839853	1.08528	-0.177743	-0.492612	1.14547	1.09521	1.08528	1.03996
NG_021386.2	TAB2	-0.338965	-0.330214	1.42817	1.41528	1.07953	1.45695	1.36374	-0.492157	1.5082	1.48801	1.45695	1.43962
NG_021387.1	ZDHHC9	0.789974	0.808753	1.04026	1.0345	0.930538	0.374906	0.793331	-0.491958	-1.35058	-1.38189	0.374906	0.359479
NG_021388.1	ZNF280C	-0.704583	-0.692698	-0.365255	-0.405875	-0.874739	0.578046	0.105422	-0.490563	-0.111195	-0.167375	0.578046	0.524573
NG_021389.1	RPS20P4	-0.817941	-0.811298	-2.09418	-2.11283	-1.7444	-1.34967	0.792141	-0.486957	0.842734	0.812277	-1.34967	-1.3742
NG_021393.1	TMPO	-0.443312	-0.436443	-0.909842	-0.929668	-1.06451	1.22076	0.16672	-0.485686	1.53797	1.52182	1.22076	1.20608
NG_021394.1	LRP4	-1.03478	-1.02824	0.858442	0.844153	0.508219	1.25266	0.953635	-0.483433	1.34222	1.32192	1.25266	1.23473
NG_021399.1	SF1	0.0993466	0.110439	0.611819	0.594816	-2.52053	-1.37748	0.542106	-0.482655	0.575536	0.548334	-1.37748	-1.41094
NG_021401.1	SLC4A10	0.246643	0.260862	0.424336	0.399465	-2.69452	0.564479	0.314527	-0.482445	1.0024	0.969062	0.564479	0.532896
NG_021408.2	EMG1	0.183806	0.20273	1.5151	1.49864	-0.217488	0.666844	0.724083	-0.480832	-0.410317	-0.450054	0.666844	0.637911
NG_021409.1	TRIM32	0.302898	0.316478	0.595613	0.567008	-0.328203	0.681342	0.379981	-0.478301	0.951884	0.909538	0.681342	0.644626
NG_021423.1	ANAPC15	-0.74501	-0.726917	-1.27736	-1.29519	1.52561	0.290854	-1.2041	-0.478069	0.281273	0.254141	0.290854	0.267392
NG_021426.1	ZBTB38	-0.606331	-0.603953	1.3101	1.30489	-0.741771	-0.302251	1.31328	-0.474801	1.23953	1.226	-0.302251	-0.324575
NG_021431.1	SCML2	-0.491723	-0.494322	0.588365	0.555708	-1.34191	-1.12971	0.332676	-0.474106	1.47243	1.43262	-1.12971	-1.17887
NG_021468.1	THOC2	0.765537	0.768339	-1.68896	-1.69759	0.694636	0.0371168	-0.369011	-0.472228	1.30049	1.27302	0.0371168	0.0173943
NG_021477.1	GAD1	NA	NA	NA	NA	NA	NA	NA	NA	NA	NA	NA	NA
NG_022926.1	ACVR1B	0.980883	0.984427	-1.45257	-1.45234	0.317311	-0.640359	0.75814	-0.467692	1.08705	1.05892	-0.640359	-0.651105
NG_022929.1	PPIP5K1	-0.88922	-0.885361	-1.31275	-1.34394	0.935469	1.40447	-0.835596	-0.466384	-0.537154	-0.57175	1.40447	1.38643
NG_022931.1	DGCR8	NA	NA	NA	NA	NA	NA	NA	NA	NA	NA	NA	NA
NG_022933.1	DNAJC19	NA	NA	NA	NA	NA	NA	NA	NA	NA	NA	NA	NA
NG_023033.1	SRC	-0.22853	-0.222479	-1.22143	-1.23933	1.07087	1.22965	2.46577	-0.462545	1.57934	1.5665	1.22965	1.21788
NG_023038.1	ATG16L1	NA	NA	NA	NA	NA	NA	NA	NA	NA	NA	NA	NA
NG_023039.1	CUX2	0.234647	0.243905	-0.342684	-0.357204	0.757148	0.881572	0.524971	-0.461815	0.713741	0.689639	0.881572	0.86046
NG_023044.2	RDX	-1.62235	-1.63011	-0.155754	-0.178202	0.391629	1.33117	1.26088	-0.461096	0.120408	0.0904135	1.33117	1.31444
NG_023046.1	PHB	-0.510552	-0.507429	-0.576901	-0.59349	-0.874002	1.40277	1.35318	-0.458192	1.54376	1.52696	1.40277	1.38799
NG_023054.2	MAPK1	NA	NA	NA	NA	NA	NA	NA	NA	NA	NA	NA	NA
NG_023055.1	SLC26A5	NA	NA	NA	NA	NA	NA	NA	NA	NA	NA	NA	NA
NG_023193.2	CA8	0.869691	0.8713	-1.40688	-1.41759	0.829409	0.159599	0.542299	-0.457481	0.473817	0.454819	0.159599	0.143151
NG_023206.1	FDX1P1	1.23603	1.23332	-0.546627	-0.566624	-0.696233	-0.836924	1.64534	-0.456702	0.203966	0.173297	-0.836924	-0.861734
NG_023212.2	ADAMTS2	1.45668	1.48471	-1.15517	-1.22653	1.91791	0.239721	0.40197	-0.456179	1.20026	1.16161	0.239721	0.187492
NG_023225.1	ACAA1	-1.45927	-1.46076	-2.42459	-2.45878	0.215187	0.295372	0.902101	-0.452066	0.713441	0.698062	0.295372	0.279525
NG_023230.1	ATP1B1	NA	NA	NA	NA	NA	NA	NA	NA	NA	NA	NA	NA
NG_023240.1	EWSR1	0.93655	0.95416	-1.9258	-1.94769	-0.148847	1.12456	1.13	-0.450769	-0.270693	-0.290335	1.12456	1.11524
NG_023244.1	FOXO1	-0.338284	-0.318747	-1.54431	-1.55834	-0.24722	-0.824257	-0.152964	-0.449228	-0.232827	-0.265724	-0.824257	-0.84932
NG_023250.3	HDAC9	1.87649	1.85681	-0.787228	-0.811605	0.269674	0.731976	0.349856	-0.447386	-0.854449	-0.891175	0.731976	0.688247
NG_023253.1	INPPL1	-1.18585	-1.0248	0.198573	0.245432	-1.55053	0.0324447	0.703616	-0.44445	0.923242	0.918509	0.0324447	0.0812331
NG_023255.1	LAMB1	NA	NA	NA	NA	NA	NA	NA	NA	NA	NA	NA	NA
NG_023258.1	MN1	-0.641416	-0.629005	-1.76163	-1.7813	-1.6109	-0.118907	0.526844	-0.443957	0.729285	0.696901	-0.118907	-0.146468
NG_023259.1	NPAS2	-0.957622	-0.945186	-1.41227	-1.41717	0.645375	0.950359	-0.661747	-0.443579	0.624288	0.593993	0.950359	0.920097
NG_023260.1	OGDH	0.981236	0.979858	-0.942705	-0.949989	-0.398642	0.625997	1.27493	-0.442397	0.748265	0.727827	0.625997	0.608204
NG_023266.1	PTPRZ1	NA	NA	NA	NA	NA	NA	NA	NA	NA	NA	NA	NA
NG_023267.1	RAD51B	-0.360697	-0.355743	-0.755255	-0.764272	-0.361193	1.5748	0.616261	-0.441899	0.346137	0.327807	1.5748	1.55466
NG_023268.1	RASGRP1	NA	NA	NA	NA	NA	NA	NA	NA	NA	NA	NA	NA
NG_023272.2	RUNX1T1	1.24878	1.23951	0.565195	0.532966	0.69837	-0.514129	0.737409	-0.440155	-1.11094	-1.12489	-0.514129	-0.534103
NG_023287.1	TRIM33	0.430538	0.439602	-2.24895	-2.26734	0.478107	0.650565	0.424743	-0.438749	1.08641	1.0618	0.650565	0.628865
NG_023292.1	NSD3	-0.662158	-0.649297	-2.72477	-2.78989	-0.117614	0.909473	0.706501	-0.433296	1.12455	1.10073	0.909473	0.887443
NG_023293.1	PAXIP1	NA	NA	NA	NA	NA	NA	NA	NA	NA	NA	NA	NA
NG_023295.2	ACACA	1.5377	1.52611	-0.513458	-0.532511	-0.575916	-0.039219	-0.487435	-0.428073	1.93571	1.89847	-0.039219	-0.064824
NG_023299.1	CREB1	-0.787205	-0.771493	0.1019	0.0596748	-0.586801	1.56327	0.728238	-0.427479	-0.748941	-0.796403	1.56327	1.49313
NG_023302.1	IDH2	NA	NA	NA	NA	NA	NA	NA	NA	NA	NA	NA	NA
NG_023310.1	PLAG1	-0.505155	-0.49745	1.09187	1.09402	-0.309152	1.51617	1.11905	-0.421945	0.576271	0.55615	1.51617	1.52005
NG_023312.1	RGS4	0.339716	0.340572	0.586664	0.571792	0.458654	0.115709	0.673863	-0.420936	-0.798413	-0.807969	0.115709	0.101507
NG_023313.1	SORL1	NA	NA	NA	NA	NA	NA	NA	NA	NA	NA	NA	NA
NG_023322.1	ING3	-0.480378	NA	-1.06248	-1.10687	NA	-0.210506	NA	-0.41995	2.05214	2.03083	-0.210506	-0.253634
NG_023324.1	SLC49A4	-0.853186	-0.851293	0.113801	0.0860937	-1.10922	0.0732807	-0.291352	-0.418378	1.75253	1.72655	0.0732807	0.0390537
NG_023330.1	SMAD7	-0.243531	-0.232611	-0.0998943	-0.146579	-0.991244	-0.902169	-0.3117	-0.417495	0.452769	0.384409	-0.902169	-0.952823
NG_023340.1	SMO	-0.356549	-0.313322	2.2322	2.14462	-1.18975	-0.857761	1.19706	-0.417269	0.0508549	0.0273108	-0.857761	-0.844203
NG_023345.1	THRA	1.06758	1.06361	0.940325	0.925002	0.868674	0.861815	-1.27028	-0.417215	0.776153	0.756512	0.861815	0.843769
NG_023348.2	ZMYM2	0.395472	0.409224	1.26454	1.23227	0.263593	-0.0353335	0.819776	-0.416632	-1.80524	-1.83585	-0.0353335	-0.0692515
NG_023350.1	PRSS12	1.37698	1.40637	1.31207	1.33011	0.654713	1.05226	0.886368	-0.416174	0.259857	0.250248	1.05226	1.06109
NG_023364.1	ALDH7A1P1	0.574978	0.578912	0.894397	0.865502	0.566063	-1.44285	1.03008	-0.415818	-0.6443	-0.653559	-1.44285	-1.43529
NG_023366.1	MED13L	-0.699001	-0.684425	1.29054	1.26375	-0.541268	-0.828035	-0.820703	-0.414022	-0.886019	-0.897819	-0.828035	-0.837496
NG_023371.1	NUP214	1.25958	1.26575	-1.10731	-1.12624	1.22093	1.69408	1.66509	-0.411816	1.62159	1.60462	1.69408	1.68
NG_023373.1	MTUS1	-0.347974	-0.341105	-0.630461	-0.646395	-0.777101	1.70681	0.35563	-0.40954	-0.444823	-0.466688	1.70681	1.69755
NG_023375.1	GPD1L	NA	NA	NA	NA	NA	NA	NA	NA	NA	NA	NA	NA
NG_023402.2	JAK1	-0.938555	-0.943899	-0.447151	-0.491303	-1.97349	0.678266	-0.290592	-0.409017	0.309749	0.260445	0.678266	0.640032
NG_023414.1	TTC37	0.866944	0.857964	-0.758594	-0.776216	-0.112791	1.29172	0.636911	-0.407826	1.31752	1.28693	1.29172	1.26376
NG_023416.1	HPSE2	-1.07612	-1.08297	-1.35602	-1.39493	-0.125733	-0.242336	0.926929	-0.405353	0.826035	0.791686	-0.242336	-0.280022
NG_023421.1	VIPAS39	1.23591	1.25724	-1.58405	-1.61489	-1.09382	1.34378	1.25249	-0.405208	0.647434	0.634278	1.34378	1.34143
NG_023427.1	MEF2C	0.0824702	0.0895766	-1.33948	-1.34955	-0.174299	2.7368	0.23141	-0.403103	0.795179	0.765445	2.7368	2.69943
NG_023428.1	ODCP	1.66878	1.71169	0.888021	0.88724	-0.221078	0.362853	0.685016	-0.402892	-1.63954	-1.68274	0.362853	0.35014
NG_023441.1	MSRB3	NA	NA	NA	NA	NA	NA	NA	NA	NA	NA	NA	NA
NG_023443.2	EYS	NA	NA	NA	NA	NA	NA	NA	NA	NA	NA	NA	NA
NG_023544.1	CTNND2	0.173901	0.189383	-0.225984	-0.240643	0.0459587	-0.569512	1.04903	-0.402701	0.964161	0.94049	-0.569512	-0.590247
NG_027520.1	PABPC1	1.77064	1.7912	-0.78377	-0.797688	1.7724	1.37907	1.71336	-0.397932	-0.126492	-0.140854	1.37907	1.37876
NG_027527.1	SETBP1	NA	NA	NA	NA	NA	NA	NA	NA	NA	NA	NA	NA
NG_027529.1	COG4	1.66407	1.69506	-1.34984	-1.36621	-1.09484	1.19027	1.54711	-0.39708	-0.926175	-0.947497	1.19027	1.18139
NG_027535.1	IGSF21	1.55195	1.56676	1.34656	1.33924	-0.122447	0.68884	1.6145	-0.397022	0.72757	0.708367	0.68884	0.672558
NG_027548.1	NUCKS1	1.09324	1.0784	-0.384609	-0.420786	0.904245	-1.47165	1.04408	-0.396396	-1.4959	-1.53984	-1.47165	-1.51267
NG_027669.1	UBR4	1.1414	1.16746	-1.55873	-1.6074	0.91345	1.3323	-0.324548	-0.394254	-0.55862	-0.569903	1.3323	1.40514
NG_027670.1	THSD7A	NA	NA	NA	NA	NA	NA	NA	NA	NA	NA	NA	NA
NG_027674.1	DDIT3	-0.326383	-0.313063	-0.879101	-0.89358	-0.832162	0.022254	2.64297	-0.392714	0.211459	0.191678	0.022254	0.00514371
NG_027680.1	RTF1	0.0717787	0.0844919	0.823822	0.807341	1.2615	0.490924	-0.473219	-0.392683	0.240324	0.218867	0.490924	0.471326
NG_027683.1	SEMA4A	1.23286	1.26542	-1.33756	-1.3714	-0.401933	1.51335	1.88187	-0.392358	-0.618044	-0.642879	1.51335	1.5364
NG_027690.1	PCM1	NA	NA	NA	NA	NA	NA	NA	NA	NA	NA	NA	NA
NG_027693.2	PDE4DIP	0.611389	0.624234	0.692241	0.683512	0.817029	-0.236564	0.980302	-0.38933	0.955375	0.941981	-0.236564	-0.259239
NG_027696.1	COQ9	0.727971	0.72817	-1.432	-1.45808	0.53869	-1.28402	0.626483	-0.389152	-0.231494	-0.26882	-1.28402	-1.31636
NG_027698.1	USB1	-0.929269	-0.923379	2.0013	1.97652	-1.96008	-0.0788213	1.28222	-0.386897	0.789915	0.757953	-0.0788213	-0.105498
NG_027701.1	RARA	NA	NA	NA	NA	NA	NA	NA	NA	NA	NA	NA	NA
NG_027721.2	TGFB2	NA	NA	NA	NA	NA	NA	NA	NA	NA	NA	NA	NA
NG_027724.1	MIPOL1	-0.860331	NA	-1.282	NA	NA	0.858586	NA	-0.385297	1.25221	NA	0.858586	NA
NG_027725.1	FBXO33	NA	NA	NA	NA	NA	NA	NA	NA	NA	NA	NA	NA
NG_027726.1	NEXMIF	0.152158	0.173804	0.19275	0.152302	0.112056	0.181176	-2.50033	-0.38442	1.18768	1.12293	0.181176	0.128667
NG_027731.2	RGS5	0.599462	0.605127	-0.420494	-0.426839	-0.654843	0.957904	0.838571	-0.383521	-0.123676	-0.136671	0.957904	0.940588
NG_027734.1	ROBO2	1.04442	1.05946	-0.218465	-0.234329	2.17026	0.25684	1.12702	-0.380321	-1.57883	-1.60309	0.25684	0.236124
NG_027747.1	POLR2A	0.329675	0.333399	0.0450885	0.0304751	-2.26052	0.210925	0.631509	-0.38018	0.260316	0.236177	0.210925	0.190186
NG_027748.1	SPTAN1	0.20734	0.211074	-2.16605	-2.15561	0.276288	0.512383	0.546285	-0.379061	0.691483	0.669008	0.512383	0.493729
NG_027782.1	VPS13C	NA	NA	NA	NA	NA	NA	NA	NA	NA	NA	NA	NA
NG_027801.1	TMEM203	0.558643	0.593248	-0.48551	-0.525423	-0.450846	0.10345	1.05245	-0.378441	-1.02399	-1.09549	0.10345	0.0720453
NG_027811.1	SDCCAG8	NA	NA	NA	NA	NA	NA	NA	NA	NA	NA	NA	NA
NG_027813.1	KMT2A	0.583579	0.585832	-1.18406	-1.18852	0.54761	-1.48557	-1.21713	-0.377657	-1.68302	-1.69013	-1.48557	-1.49164
NG_027814.2	SATB1	NA	NA	NA	NA	NA	NA	NA	NA	NA	NA	NA	NA
NG_027817.1	VDAC1	0.159916	0.159614	-0.354139	-0.384819	1.70631	-0.130157	-0.29974	-0.375665	0.129218	0.0969011	-0.130157	-0.162567
NG_027818.1	MLLT10	0.15474	0.166849	-2.13449	-2.1377	-1.68137	0.264205	0.725075	-0.37531	0.856554	0.827068	0.264205	0.241732
NG_027819.1	CCDC6	-0.343657	-0.332076	-0.397142	-0.414129	-0.0845548	-0.0957043	-0.587871	-0.375136	0.645006	0.616337	-0.0957043	-0.118579
NG_027821.1	TFG	NA	NA	NA	NA	NA	NA	NA	NA	NA	NA	NA	NA
NG_027822.1	AGGF1	-0.729727	-0.719426	-1.16409	-1.17252	-1.21577	1.50671	-0.376967	-0.374269	-1.34551	-1.35989	1.50671	1.47967
NG_027823.1	PLEKHA1	0.238016	0.242206	-0.770341	-0.782103	0.110642	0.322324	1.23317	-0.37367	0.441306	0.424413	0.322324	0.307454
NG_027827.1	KMT2D	0.508163	0.519294	-1.85038	-1.87212	-1.48851	0.703616	0.51097	-0.370671	1.16419	1.15384	0.703616	0.693199
NG_027833.1	AOPEP	NA	NA	NA	NA	NA	NA	NA	NA	NA	NA	NA	NA
NG_027868.1	ASXL1	NA	NA	NA	NA	NA	NA	NA	NA	NA	NA	NA	NA
NG_027904.2	GNAQ	0.330385	0.347068	-2.67991	-2.73807	0.663843	-0.334331	0.401635	-0.367975	0.350041	0.318466	-0.334331	-0.369909
NG_027934.1	PSENEN	NA	NA	NA	NA	NA	NA	NA	NA	NA	NA	NA	NA
NG_027935.1	NCSTN	-0.663429	-0.662877	-0.778507	-0.795837	-1.22264	1.60771	1.64102	-0.365149	-0.660368	-0.682322	1.60771	1.60611
NG_027957.1	PDE4D	0.720823	0.722762	-1.17727	-1.17124	-0.518382	-0.913236	-0.66869	-0.364208	2.05311	1.98777	-0.913236	-0.918125
NG_027960.1	ARHGEF12	1.63745	1.64226	-0.906814	-0.92271	1.21541	1.95152	0.0801792	-0.363967	-0.994424	-1.01746	1.95152	1.93474
NG_027971.1	FAM219A	-0.937007	-0.934826	-2.19674	-2.22317	0.898422	0.854918	0.54643	-0.363891	1.22321	1.20847	0.854918	0.841024
NG_027982.1	NEK1	-0.831149	-0.817723	1.02663	0.994267	-0.64392	1.19194	0.169681	-0.363059	-0.381037	-0.402307	1.19194	1.15209
NG_027991.1	FAP	NA	NA	NA	NA	NA	NA	NA	NA	NA	NA	NA	NA
NG_027992.2	RRM1	NA	NA	NA	NA	NA	NA	NA	NA	NA	NA	NA	NA
NG_027994.1	TST	1.49885	1.51085	0.633797	0.623321	-1.77191	0.214963	-0.015452	-0.359135	0.818289	0.799074	0.214963	0.200206
NG_028007.1	MAP4K3	NA	NA	NA	NA	NA	NA	NA	NA	NA	NA	NA	NA
NG_028012.1	DOCK3	-0.233015	-0.227484	-1.92437	-1.94828	-0.348252	0.538487	0.942886	-0.357675	1.07678	1.04273	0.538487	0.508141
NG_028023.1	CHUK	0.0811432	0.0896967	0.322746	0.306928	-1.35349	0.930848	0.414779	-0.356158	1.1562	1.13931	0.930848	0.915288
NG_028030.1	PDZD7	NA	NA	NA	NA	NA	NA	NA	NA	NA	NA	NA	NA
NG_028036.1	PTPN14	NA	NA	NA	NA	NA	NA	NA	NA	NA	NA	NA	NA
NG_028041.1	AK3	1.0726	1.08581	-0.850521	-0.862282	1.2097	0.381487	-0.786367	-0.355653	-0.626368	-0.647039	0.381487	0.361916
NG_028043.1	KIF16B	NA	NA	NA	NA	NA	NA	NA	NA	NA	NA	NA	NA
NG_028060.1	DOCK4	NA	NA	NA	NA	NA	NA	NA	NA	NA	NA	NA	NA
NG_028077.1	SHROOM3	0.417841	0.428828	1.49354	1.46451	-0.234571	0.43052	0.0784591	-0.35541	-0.722388	-0.734087	0.43052	0.408897
NG_028079.2	CFAP57	0.0951783	0.0977327	-2.46623	-2.45465	-0.191714	-0.218779	0.371354	-0.35181	0.111783	0.0922706	-0.218779	-0.232934
NG_028094.1	ZNF592	NA	NA	NA	NA	NA	NA	NA	NA	NA	NA	NA	NA
NG_028095.1	GPR22	-0.345443	-0.312009	-2.26295	-2.27119	0.898222	0.271956	1.09078	-0.350833	1.04997	1.00836	0.271956	0.240607
NG_028105.1	FXR2	-0.557701	-0.54686	-0.931329	-0.93912	-0.939941	-0.271701	1.46966	-0.346615	1.50746	1.48725	-0.271701	-0.284934
NG_028110.1	KCTD7	NA	NA	NA	NA	NA	NA	NA	NA	NA	NA	NA	NA
NG_028118.1	ARRB1	NA	NA	NA	NA	NA	NA	NA	NA	NA	NA	NA	NA
NG_028133.1	PIGV	NA	NA	NA	NA	NA	NA	NA	NA	NA	NA	NA	NA
NG_028144.1	MDH1	NA	NA	NA	NA	NA	NA	NA	NA	NA	NA	NA	NA
NG_028156.1	MAB21L1	-1.03193	-1.01239	-1.21923	-1.23084	0.481083	-0.256258	1.20471	-0.344963	1.53311	1.49002	-0.256258	-0.281529
NG_028168.1	PLCB1	0.746413	0.740989	-2.51823	-2.53233	0.75032	1.39615	0.580976	-0.344768	-1.49553	-1.5207	1.39615	1.36364
NG_028171.1	SOX17	NA	NA	NA	NA	NA	NA	NA	NA	NA	NA	NA	NA
NG_028191.1	TET2	NA	NA	NA	NA	NA	NA	NA	NA	NA	NA	NA	NA
NG_028196.1	SHMT1P1	0.949406	0.953003	-1.60384	-1.6168	0.166455	0.781709	0.601378	-0.344757	0.938194	0.906598	0.781709	0.754457
NG_028200.1	SOBP	0.374166	0.388986	0.624884	0.609489	1.28105	0.643202	0.129825	-0.343791	0.28808	0.262123	0.643202	0.622064
NG_028216.2	ANO10	-0.35537	-0.348259	0.0387126	0.0189274	1.17736	0.568459	1.49278	-0.340789	-1.45388	-1.4822	0.568459	0.543406
NG_028217.1	SMOC1	NA	NA	NA	NA	NA	NA	NA	NA	NA	NA	NA	NA
NG_028219.1	ZNF513	1.76346	1.83829	-0.930048	-0.921422	-0.962585	-0.63618	1.6702	-0.339068	-0.675632	-0.674979	-0.63618	-0.633368
NG_028220.1	ANO6	0.392651	0.395256	0.412776	0.400119	0.75389	0.24553	1.04155	-0.338855	0.702045	0.683086	0.24553	0.229659
NG_028242.1	ABL2	-0.623749	-0.576299	1.21093	1.13789	-1.43895	-3.19922	0.32573	-0.335358	0.638192	0.579849	-3.19922	-3.07418
NG_028243.1	FOXP1	-0.498441	-0.489429	-0.933259	-0.955961	-0.417513	2.09975	0.551151	-0.334984	0.626284	0.602406	2.09975	2.08731
NG_028246.1	PBX1	-0.386835	-0.370274	-0.723469	-0.727712	1.00805	-1.14981	-0.470476	-0.332545	1.63968	1.5994	-1.14981	-1.15342
NG_028248.1	ARNT	NA	NA	NA	NA	NA	NA	NA	NA	NA	NA	NA	NA
NG_028249.1	KDSR	0.69764	0.6954	-0.392502	-0.417063	0.974748	-1.0678	0.57387	-0.331393	-0.826093	-0.858683	-1.0678	-1.09691
NG_028252.1	ORC4	NA	NA	NA	NA	NA	NA	NA	NA	NA	NA	NA	NA
NG_028265.1		-2.47104	-2.49888	0.811978	0.789425	0.42806	-1.08926	0.208531	-0.330922	1.05404	1.0209	-1.08926	-1.13137
NG_028280.1	SORT1	1.20194	1.20966	-0.8295	-0.855884	0.060532	-0.90183	1.3888	-0.330051	0.98222	0.949436	-0.90183	-0.93364
NG_028282.1	SPTLC2	NA	NA	NA	NA	NA	NA	NA	NA	NA	NA	NA	NA
NG_028283.2	POLR1C	0.869161	0.863853	-1.63642	-1.63411	-0.983935	0.782707	0.934821	-0.327141	0.907176	0.880368	0.782707	0.759518
NG_028336.1	TECR	0.618832	0.624874	-1.81415	-1.83508	-0.848962	0.858864	1.16945	-0.32676	0.956143	0.945047	0.858864	0.84943
NG_028348.1	PTP4A2P2	-0.873403	-0.866657	0.718107	0.713393	0.506383	0.595696	-0.526192	-0.322881	0.994666	0.98686	0.595696	0.585134
NG_028349.1	NUBPL	-1.20325	-1.19759	-0.367407	-0.405489	0.763751	-0.554661	2.01698	-0.321814	1.4792	1.41294	-0.554661	-0.598085
NG_028352.1	COG6	NA	NA	NA	NA	NA	NA	NA	NA	NA	NA	NA	NA
NG_028908.1	POLR1D	0.944684	0.953157	-1.92298	-1.93084	0.745125	0.595276	-1.59807	-0.3209	0.926345	0.90564	0.595276	0.578251
NG_028922.1	SHOC2	1.06645	1.06215	-0.958918	-0.968183	1.17379	0.867028	0.00381435	-0.319784	-1.13049	-1.1474	0.867028	0.834333
NG_028924.1	CHIC2	1.84967	1.8446	0.373874	0.342315	0.380964	-0.0212864	0.45665	-0.317991	-1.16739	-1.19778	-0.0212864	-0.0572655
NG_028942.1	PICALM	-0.682356	-0.673352	-0.875949	-0.891747	0.96836	0.806092	1.17527	-0.315745	1.29148	1.26836	0.806092	0.786088
NG_028966.1	IL11RA	NA	NA	NA	NA	NA	NA	NA	NA	NA	NA	NA	NA
NG_028982.3	TCF20	NA	NA	NA	NA	NA	NA	NA	NA	NA	NA	NA	NA
NG_028983.1	GMEB1	NA	NA	NA	NA	NA	NA	NA	NA	NA	NA	NA	NA
NG_028987.1	VEZT	NA	NA	NA	NA	NA	NA	NA	NA	NA	NA	NA	NA
NG_029003.1	PRKCB	-1.61461	-1.59978	-0.725134	-0.736502	0.118634	0.519825	0.88131	-0.314756	0.465031	0.442278	0.519825	0.499803
NG_029011.1	HNRNPC	0.77441	0.781785	0.939922	0.928491	0.132978	1.01757	-0.741019	-0.314213	-0.676231	-0.704059	1.01757	1.00256
NG_029013.3	RARB	-0.14825	-0.155902	-1.02718	-1.06494	1.68608	0.153625	0.672825	-0.312379	0.210255	0.174097	0.153625	0.119862
NG_029014.1	NCOA1	NA	NA	NA	NA	NA	NA	NA	NA	NA	NA	NA	NA
NG_029017.2	ATAD2B	-0.135472	-0.127182	-2.28783	-2.31273	0.769339	1.40187	-0.261399	-0.308346	1.5708	1.54176	1.40187	1.37634
NG_029019.1	CEBPB	-0.371011	NA	-0.113008	-0.132271	NA	1.20312	NA	-0.304872	0.587111	0.570115	1.20312	1.19915
NG_029020.1	HMGA1	1.27244	1.25729	0.958833	0.945262	-0.672898	0.825178	-0.51433	-0.301679	0.733206	0.71239	0.825178	0.80723
NG_029028.1	CKS1B	1.75883	1.77363	1.19145	1.17694	-0.998676	-0.879956	1.4854	-0.300186	1.53199	1.51318	-0.879956	-0.912908
NG_029036.1	PML	-0.712508	-0.708064	0.982567	0.970356	-0.742999	0.623722	0.642781	-0.299381	0.813278	0.796239	0.623722	0.608766
NG_029038.1	PDE4B	-1.22806	-1.21902	1.73502	1.71049	1.13229	-0.299384	2.09311	-0.297932	0.7292	0.693987	-0.299384	-0.330382
NG_029040.2	CDC25B	0.394941	0.420378	0.349275	0.319817	1.09066	1.0778	0.781253	-0.291012	-0.889338	-0.955976	1.0778	1.0487
NG_029053.2	MAPK8	0.235097	0.242213	-0.9265	-0.951401	1.29173	0.905438	1.98229	-0.290662	1.85696	1.84545	0.905438	0.889738
NG_029061.2	NUMB	1.557	1.56591	-1.15567	-1.17548	-0.373852	-0.732491	-0.623594	-0.289663	0.325838	0.296381	-0.732491	-0.758041
NG_029065.1	CREM	NA	NA	NA	NA	NA	NA	NA	NA	NA	NA	NA	NA
NG_029067.1	FGF2	2.73658	2.75371	0.945091	0.922383	-0.222863	-0.206623	0.56934	-0.288019	0.206998	0.171137	-0.206623	-0.238491
NG_029078.1	CTNND1	NA	NA	NA	NA	NA	NA	NA	NA	NA	NA	NA	NA
NG_029082.1	CATSPERE	0.145487	0.164756	-0.641188	-0.644877	-0.938883	-0.529506	0.214087	-0.28778	0.616155	0.597035	-0.529506	-0.539033
NG_029091.1	SZT2	NA	NA	NA	NA	NA	NA	NA	NA	NA	NA	NA	NA
NG_029095.1	BCCIP	NA	NA	NA	NA	NA	NA	NA	NA	NA	NA	NA	NA
NG_029099.1	DLG1	1.01934	1.02773	-0.925949	-0.955094	0.57404	0.78481	-0.00314146	-0.287635	1.21389	1.19922	0.78481	0.768816
NG_029101.1	GABBR1	NA	NA	NA	NA	NA	NA	NA	NA	NA	NA	NA	NA
NG_029103.1	HNRNPD	NA	NA	NA	NA	NA	NA	NA	NA	NA	NA	NA	NA
NG_029105.1	IL1RAP	NA	NA	NA	NA	NA	NA	NA	NA	NA	NA	NA	NA
NG_029107.2	ITGA3	1.03299	1.03225	-1.23265	-1.24594	0.968394	-1.77927	1.42195	-0.285366	0.54595	0.517084	-1.77927	-1.79501
NG_029108.1	MEIS2	1.10343	1.09556	-1.75444	-1.7728	1.67824	0.732982	-0.061948	-0.285008	1.27652	1.23647	0.732982	0.698687
NG_029111.1	MYLK	NA	NA	NA	NA	NA	NA	NA	NA	NA	NA	NA	NA
NG_029114.1	PFN2	0.692551	0.708021	0.666141	0.656321	0.0854349	-0.177677	0.574276	-0.284236	0.386159	0.364512	-0.177677	-0.201673
NG_029116.1	PTPN2	NA	NA	NA	NA	NA	NA	NA	NA	NA	NA	NA	NA
NG_029119.1	SEMA6D	NA	NA	NA	NA	NA	NA	NA	NA	NA	NA	NA	NA
NG_029120.1	SORCS1	-1.44579	-1.43889	-0.797004	-0.826656	-0.665606	1.53642	-0.496353	-0.283866	0.5726	0.534231	1.53642	1.50772
NG_029123.1	AKAP7	0.992323	0.992599	0.908758	0.89384	0.450571	0.725774	1.06279	-0.282848	0.662189	0.64256	0.725774	0.708112
NG_029143.1	MAP2K5	0.662299	0.67098	-0.732718	-0.748731	-0.870614	0.516024	1.68461	-0.277787	-0.716557	-0.74062	0.516024	0.495594
NG_029147.1	NFATC3	1.24972	1.25895	-1.5571	-1.56573	-0.621556	0.517867	1.17789	-0.277537	0.474736	0.448647	0.517867	0.494986
NG_029153.1	SP3	-0.880025	-0.869147	-1.09584	-1.11285	-0.154463	1.59239	-0.610681	-0.27467	1.78732	1.76079	1.59239	1.56929
NG_029160.1	GART	1.28896	1.28944	-1.23294	-1.24904	1.31993	-0.525293	1.32553	-0.272801	-0.41671	-0.443127	-0.525293	-0.548222
NG_029165.1	CTNNBIP1	NA	NA	NA	NA	NA	NA	NA	NA	NA	NA	NA	NA
NG_029166.1	SOX4	0.647032	0.687024	-0.0697306	-0.0983423	1.11339	0.379455	0.329847	-0.272245	-0.569595	-0.624244	0.379455	0.34022
NG_029171.1	NRDC	NA	NA	NA	NA	NA	NA	NA	NA	NA	NA	NA	NA
NG_029180.1	AHCYL2	0.135155	0.142455	-1.48339	-1.50459	-0.101793	0.807126	0.615439	-0.268707	0.956393	0.927271	0.807126	0.781464
NG_029182.1	AHCYL1	NA	NA	NA	NA	NA	NA	NA	NA	NA	NA	NA	NA
NG_029184.1	MTFMT	0.343108	0.344867	-1.84932	-1.85701	0.22132	0.230026	0.452096	-0.268659	0.957644	0.923136	0.230026	0.203495
NG_029185.1	MTHFD1L	2.07602	2.11332	-0.159806	-0.178352	0.798366	1.04332	-0.741667	-0.268534	-0.797555	-0.829489	1.04332	1.0296
NG_029186.1	CALD1	0.580277	0.595112	1.6185	1.59867	0.724528	-1.30579	-0.134098	-0.265741	0.882771	0.84723	-1.30579	-1.34801
NG_029188.1	CASP9	NA	NA	NA	NA	NA	NA	NA	NA	NA	NA	NA	NA
NG_029189.1	CCNT2	0.792675	0.801203	-1.61075	-1.62729	-1.64083	1.0258	1.0919	-0.264409	-0.391432	-0.412349	1.0258	1.01006
NG_029191.3	DGKH	0.994207	1.00548	-1.04016	-1.06274	-0.335008	0.900073	-1.94066	-0.261832	0.311795	0.261699	0.900073	0.850202
NG_029218.1	HTR7	NA	NA	NA	NA	NA	NA	NA	NA	NA	NA	NA	NA
NG_029220.1	ILF3	NA	NA	NA	NA	NA	NA	NA	NA	NA	NA	NA	NA
NG_029221.1	LIG3	0.644938	0.649227	-1.38357	-1.40426	-0.223273	-0.194566	1.41731	-0.261407	1.05712	1.03983	-0.194566	-0.214365
NG_029223.1	MYL6	0.346788	0.360657	0.107546	0.0975267	0.27467	0.809865	0.881839	-0.257926	0.768974	0.759981	0.809865	0.804123
NG_029225.1	NEK11	0.297817	0.306387	-0.988514	-1.00158	1.05069	0.52977	1.71298	-0.257224	0.895913	0.874909	0.52977	0.511734
NG_029228.1	OS9	0.510585	0.513685	-1.40607	-1.41754	-1.27452	0.600081	0.588034	-0.256716	0.502901	0.484056	0.600081	0.583472
NG_029233.1	PPP2R2C	-0.718788	-0.705433	-1.19068	-1.19252	0.413383	-0.623944	1.00523	-0.256273	1.00879	0.990275	-0.623944	-0.632029
NG_029234.1	PPP2R3A	-1.16123	-1.08442	1.1959	1.12608	0.233237	-1.60497	0.861031	-0.25531	-0.415755	-0.461183	-1.60497	-1.60657
NG_029236.1	RGS6	NA	NA	NA	NA	NA	NA	NA	NA	NA	NA	NA	NA
NG_029240.1	TIAL1	-0.730825	-0.733002	0.529277	0.497184	-1.66084	0.682236	0.275174	-0.252292	1.01892	0.978869	0.682236	0.639538
NG_029241.1	USF2	1.14721	1.14458	-1.35413	-1.38416	0.969986	0.848511	-0.00720324	-0.246541	0.90268	0.877246	0.848511	0.826156
NG_029243.1	MTHFS	-0.856006	-0.84581	1.21146	1.18659	1.92807	0.0672869	1.07156	-0.243415	-0.312796	-0.34004	0.0672869	0.0419993
NG_029244.2	SP8	NA	NA	NA	NA	NA	NA	NA	NA	NA	NA	NA	NA
NG_029246.1	RORA	-0.481895	-0.41702	-2.07697	-1.98022	0.349797	-1.21865	-0.236525	-0.242754	-1.61625	-1.56028	-1.21865	-1.17715
NG_029321.1	CABP1	0.721449	0.729138	-2.00992	-2.0079	-0.265299	-0.634117	0.27688	-0.242536	0.869761	0.807857	-0.634117	-0.664809
NG_029322.2	DST	0.424251	0.437627	0.890617	0.873042	-1.71776	0.972352	0.625844	-0.241826	0.880862	0.854531	0.972352	0.949507
NG_029334.1	GATA2	-1.48475	-1.53497	-0.242089	-0.303837	-0.215952	-1.37952	0.216577	-0.240941	1.53323	1.50235	-1.37952	-1.47906
NG_029358.2	PPIP5K1P1	1.1267	1.12459	-1.0447	-1.06098	1.10031	1.23672	1.11745	-0.237069	-0.489772	-0.51222	1.23672	1.21675
NG_029365.2	CHN2	0.632161	0.644185	0.926756	0.910521	0.563006	0.666059	0.998197	-0.236956	0.778229	0.753283	0.666059	0.644455
NG_029370.1	PTPA	NA	NA	NA	NA	NA	NA	NA	NA	NA	NA	NA	NA
NG_029372.1	BACE1	0.1719	0.182287	0.568902	0.555786	0.478831	0.71514	0.658633	-0.235489	0.543668	0.522298	0.71514	0.697685
NG_029373.1	MAP3K20	-0.349911	-0.337983	0.896329	0.867669	0.627954	0.8617	-1.09858	-0.234569	0.672026	0.634101	0.8617	0.826751
NG_029374.1	RNF216	0.800218	0.797888	-1.0514	-1.05987	0.318293	0.180882	0.622628	-0.233206	0.249273	0.23365	0.180882	0.167331
NG_029392.1	TXNRD1	0.21822	0.224763	0.453943	0.43038	0.051564	-1.14648	1.25416	-0.232836	-0.656978	-0.674556	-1.14648	-1.15443
NG_029395.1	ADRA1A	-0.0818649	-0.0735787	2.23988	2.24546	0.521124	1.13884	0.243348	-0.230526	1.09344	1.0796	1.13884	1.12864
NG_029406.1	ATRN	NA	NA	NA	NA	NA	NA	NA	NA	NA	NA	NA	NA
NG_029407.1	CAMK2B	0.573552	0.581922	-2.45782	-2.46025	0.366667	0.107098	0.85682	-0.229134	0.595804	0.574489	0.107098	0.0905396
NG_029408.1	CAMK2G	0.85673	0.861418	-1.61101	-1.61858	-1.06609	0.0721836	0.604791	-0.22291	1.29478	1.26478	0.0721836	0.0514057
NG_029409.1	CAMKK2	NA	NA	NA	NA	NA	NA	NA	NA	NA	NA	NA	NA
NG_029432.1	OSBPL1A	1.17475	1.1776	0.973367	0.95536	-0.814365	1.09907	-0.899818	-0.220603	-0.764572	-0.785914	1.09907	1.07646
NG_029444.2	PAM	NA	NA	NA	NA	NA	NA	NA	NA	NA	NA	NA	NA
NG_029445.1	PCSK5	-0.667836	-0.656219	1.34763	1.32278	-0.949463	1.46142	-0.597089	-0.219535	1.15848	1.12163	1.46142	1.42952
NG_029450.1	DENND2B	NA	NA	NA	NA	NA	NA	NA	NA	NA	NA	NA	NA
NG_029453.2	STAU1	1.45315	1.45039	0.929827	0.908625	-1.05173	-0.661008	1.72211	-0.218297	1.65704	1.62551	-0.661008	-0.67832
NG_029458.1	CXADR	1.60947	1.61516	0.56129	0.547583	0.475627	0.473092	0.0432188	-0.218185	0.642896	0.620939	0.473092	0.454137
NG_029462.1	MADD	0.477086	0.493058	0.622231	0.611635	0.464986	0.669917	0.75946	-0.218176	-1.51347	-1.54946	0.669917	0.654465
NG_029463.1	MDFIC	1.15821	1.18946	-0.592698	-0.627451	1.10146	0.135887	1.2513	-0.208742	1.32913	1.30841	0.135887	0.103375
NG_029465.2	DNMT3A	0.276757	0.287873	-0.0221956	-0.0380772	-0.0528774	0.292	0.377164	-0.208438	0.839436	0.81781	0.292	0.271845
NG_029466.1	MIR4453HG	-0.186929	-0.173637	-2.41006	-2.42499	-2.14117	1.13585	0.00325157	-0.205343	1.86006	1.80629	1.13585	1.09158
NG_029467.1	PTK2	NA	NA	NA	NA	NA	NA	NA	NA	NA	NA	NA	NA
NG_029468.1	SMARCD3	1.12763	1.1319	0.794497	0.785826	-1.00036	-0.797844	0.906793	-0.203872	0.741259	0.727653	-0.797844	-0.798851
NG_029473.1	HSPA8	0.770401	0.784994	-1.06721	-1.0897	0.823128	0.946196	0.791476	-0.202935	0.922641	0.927253	0.946196	0.95268
NG_029474.1	PANK1	0.910976	0.91667	0.180764	0.159382	-0.584858	-0.624931	1.11729	-0.202185	1.69777	1.65427	-0.624931	-0.645889
NG_029475.1	GABPB1	NA	NA	NA	NA	NA	NA	NA	NA	NA	NA	NA	NA
NG_029476.2	CUX1	2.67782	2.67121	-0.896138	-0.909623	0.242505	-0.0267918	-0.239511	-0.201976	-0.77099	-0.793379	-0.0267918	-0.0505742
NG_029484.1	ARID4B	-0.540921	-0.535797	-0.973037	-0.99853	0.435805	-0.966078	-1.48239	-0.200032	-0.605233	-0.637842	-0.966078	-0.996634
NG_029485.1	ATP2B1	-0.160655	-0.14918	-1.91434	-1.92855	0.0894138	0.774636	0.121719	-0.195954	1.00178	0.969371	0.774636	0.746745
NG_029491.2	CDH11	-0.0164592	-0.000831891	-1.08063	-1.08377	-0.0968007	-0.942151	-0.943496	-0.195453	0.495305	0.457676	-0.942151	-0.954007
NG_029492.1	CERT1	0.154779	0.153707	-0.580918	-0.597539	0.3464	1.57644	0.241474	-0.193344	0.190397	0.168387	1.57644	1.55701
NG_029493.1	CSPG5	NA	NA	NA	NA	NA	NA	NA	NA	NA	NA	NA	NA
NG_029494.1	DGKB	-0.332503	-0.31913	0.190564	0.161866	0.479209	-1.0177	-1.54609	-0.190668	0.136413	0.0981005	-1.0177	-1.04163
NG_029498.1	ENPP2	1.22543	1.24253	-0.476	-0.485911	1.12875	1.21903	-0.118051	-0.190158	0.350877	0.337887	1.21903	1.21052
NG_029499.1	ENSA	NA	NA	NA	NA	NA	NA	NA	NA	NA	NA	NA	NA
NG_029502.1	GAS7	NA	NA	NA	NA	NA	NA	NA	NA	NA	NA	NA	NA
NG_029503.1	GPBP1	NA	NA	NA	NA	NA	NA	NA	NA	NA	NA	NA	NA
NG_029504.1	ITSN1	0.520583	0.525813	-1.71687	-1.72436	0.418447	1.03028	-1.05244	-0.187934	0.936771	0.913163	1.03028	1.00897
NG_029510.1	PTK2B	NA	NA	NA	NA	NA	NA	NA	NA	NA	NA	NA	NA
NG_029516.1	ITSN2	0.417155	0.420296	-0.832695	-0.867621	0.336378	0.575858	1.00551	-0.186914	1.17524	1.15396	0.575858	0.551342
NG_029518.1	SESN1	NA	NA	NA	NA	NA	NA	NA	NA	NA	NA	NA	NA
NG_029520.1	SRPK1	-0.58594	-0.566134	0.732681	0.704696	0.274741	0.438517	0.59717	-0.185399	0.796625	0.754583	0.438517	0.40235
NG_029523.1	TAX1BP1	1.48272	1.4786	-1.22903	-1.23169	-0.252673	1.43896	-0.444094	-0.185289	1.47053	1.44042	1.43896	1.41137
NG_029532.1	GRM8	0.171468	0.170064	-0.455491	-0.473268	-0.193401	-0.409903	-0.19897	-0.184439	1.34897	1.31384	-0.409903	-0.431846
NG_029536.1	DMTF1	NA	NA	NA	NA	NA	NA	NA	NA	NA	NA	NA	NA
NG_029537.1	PHACTR3	-0.420686	-0.407494	-0.949393	-0.958611	0.146037	1.85574	0.978146	-0.182865	-0.8097	-0.828145	1.85574	1.81996
NG_029542.1	GFPT1	NA	1.11263	NA	NA	0.104082	NA	1.80237	NA	NA	NA	NA	NA
NG_029545.1	TIMP3	-0.104816	-0.0965865	-0.439331	-0.453573	0.0937151	1.08964	1.00758	-0.180908	-0.782463	-0.80251	1.08964	1.06353
NG_029550.1	MBD2	NA	NA	NA	NA	NA	NA	NA	NA	NA	NA	NA	NA
NG_029553.1	DNAJB2	0.93161	0.915886	-1.27973	-1.31587	-1.33982	1.0922	0.716572	-0.180203	-0.572857	-0.598804	1.0922	1.10431
NG_029558.1	RTN1	-1.10537	-1.1076	-0.531716	-0.551335	-0.914773	1.44537	-0.589149	-0.180195	0.659121	0.633546	1.44537	1.42395
NG_029559.1	CHRD	NA	NA	NA	NA	NA	NA	NA	NA	NA	NA	NA	NA
NG_029560.1	AQP4	0.381686	0.385267	-1.62952	-1.6343	0.237116	0.612233	0.473396	-0.180112	0.430442	0.411966	0.612233	0.595095
NG_029568.1	ODF2	NA	NA	NA	NA	NA	NA	NA	NA	NA	NA	NA	NA
NG_029569.2	SEC31A	NA	NA	NA	NA	NA	NA	NA	NA	NA	NA	NA	NA
NG_029576.1	PRDM16	NA	NA	NA	NA	NA	NA	NA	NA	NA	NA	NA	NA
NG_029577.1	HNRNPK	0.33572	0.347871	0.663906	0.649428	-2.23295	0.50062	0.595754	-0.179825	0.650488	0.628423	0.50062	0.482149
NG_029578.1	NFX1	0.359374	0.371298	-1.97388	-1.98772	0.485163	-0.738859	0.604602	-0.176945	0.881056	0.859669	-0.738859	-0.757271
NG_029581.1	CCDC39	0.12877	0.162211	-0.521171	-0.594473	-1.20635	1.36487	-0.0925859	-0.175577	-0.433288	-0.53357	1.36487	1.31219
NG_029583.1	RTL5	-0.0854513	-0.0441995	0.617072	0.565457	0.493402	-1.09763	-0.904478	-0.174479	0.833478	0.752415	-1.09763	-1.10918
NG_029589.1	ATP2B4	1.14749	1.14608	-1.64626	-1.66239	-0.612951	1.03161	0.886611	-0.17343	-1.02112	-1.0445	1.03161	1.0111
NG_029595.1	EED	NA	NA	NA	NA	NA	NA	NA	NA	NA	NA	NA	NA
NG_029598.1	HMGN3	NA	NA	NA	NA	NA	NA	NA	NA	NA	NA	NA	NA
NG_029600.1	NFAT5	NA	NA	NA	NA	NA	NA	NA	NA	NA	NA	NA	NA
NG_029603.1	HEPACAM	NA	NA	NA	NA	NA	NA	NA	NA	NA	NA	NA	NA
NG_029604.1	QKI	-0.847487	-0.832814	0.737466	0.716797	0.690061	0.584784	0.562527	-0.172997	0.608688	0.580817	0.584784	0.560231
NG_029606.1	HIF1A	1.5783	1.58461	-0.893602	-0.905733	-0.110047	1.73475	-0.21889	-0.170169	1.79319	1.77519	1.73475	1.71906
NG_029607.1	HSF2	0.617603	0.626931	0.628174	0.595234	-2.10058	-0.805997	-1.31427	-0.169603	0.817732	0.771419	-0.805997	-0.838361
NG_029612.2	SOX5	1.62217	NA	-0.815082	NA	NA	-1.03316	NA	-0.166619	-0.0942386	NA	-1.03316	NA
NG_029614.1	PDE7A	NA	NA	NA	NA	NA	NA	NA	NA	NA	NA	NA	NA
NG_029615.1	APBB1	NA	NA	NA	NA	NA	NA	NA	NA	NA	NA	NA	NA
NG_029619.1	NTRK3	0.245137	0.251306	-0.301625	-0.324148	-0.633447	-0.768891	1.43242	-0.165676	-1.42684	-1.44938	-0.768891	-0.793555
NG_029621.1	PDE1B	0.263204	0.268885	0.561611	0.544367	-1.36228	0.734872	-1.04613	-0.161116	1.21392	1.18781	0.734872	0.713058
NG_029626.1	SNAP25	0.193029	0.227718	-1.40955	-1.45119	-0.270169	-1.28933	1.25802	-0.159646	0.785231	0.703119	-1.28933	-1.34817
NG_029628.1	RPL41P3	-0.120826	-0.10685	-1.9619	-1.97172	1.47244	0.442409	0.197749	-0.157962	0.814326	0.781592	0.442409	0.415401
NG_029642.1	DDX17	0.337109	0.345698	0.659594	0.653645	-1.82049	0.725619	0.626703	-0.1571	0.902098	0.892112	0.725619	0.716835
NG_029648.1	POLR3A	0.0490702	0.0660797	-0.334682	-0.350011	0.0643023	-0.725235	0.0330512	-0.156358	0.967515	0.927937	-0.725235	-0.743411
NG_029659.1	BMP1	0.714586	0.731712	-1.31079	-1.33892	0.473524	0.999844	1.03819	-0.156167	0.775632	0.760247	0.999844	0.989948
NG_029663.1	CEP170	-0.666852	-0.659801	-1.765	-1.77454	0.699118	-0.618408	-0.315218	-0.155961	1.67467	1.64828	-0.618408	-0.635261
NG_029667.1	ADAM15	0.577367	0.58597	-1.44973	-1.46446	-1.62933	0.333073	0.846936	-0.155875	0.729579	0.712612	0.333073	0.3179
NG_029677.3	GRM4	NA	NA	NA	NA	NA	NA	NA	NA	NA	NA	NA	NA
NG_029678.1	HDAC3	NA	NA	NA	NA	NA	NA	NA	NA	NA	NA	NA	NA
NG_029680.1	HNRNPA2B1	NA	NA	NA	NA	NA	NA	NA	NA	NA	NA	NA	NA
NG_029681.1	HNRNPDL	-0.00897538	-0.0014343	0.492315	0.486787	0.518143	0.426765	0.516514	-0.155838	0.392887	0.379828	0.426765	0.41661
NG_029689.1	AFDN	NA	NA	NA	NA	NA	NA	NA	NA	NA	NA	NA	NA
NG_029695.1	PFDN5	1.05541	1.03981	-0.953785	-0.975554	1.3241	-0.726508	0.937799	-0.155585	-1.26053	-1.28662	-0.726508	-0.75284
NG_029704.1	PTPN13	-0.0547463	-0.0410661	1.35149	1.32148	0.981787	-0.884576	0.660092	-0.154938	-0.489371	-0.493934	-0.884576	-0.879619
NG_029708.1	SNX1	-1.00897	-0.997868	-0.175774	-0.195464	-0.7012	1.34888	-0.704768	-0.153529	1.54196	1.50626	1.34888	1.31714
NG_029709.1	SORBS2	1.22397	1.2398	-2.00459	-2.02582	-0.746385	0.946878	1.38789	-0.152155	0.79671	0.781449	0.946878	0.935755
NG_029710.1	SPAG9	0.610797	0.625703	-1.58888	-1.62162	0.47886	1.08141	-0.45888	-0.150669	-0.969201	-1.00307	1.08141	1.07042
NG_029711.1	STC1	0.371799	0.387156	0.953929	0.934676	-0.796622	0.123476	0.234448	-0.15054	-0.243802	-0.260313	0.123476	0.10686
NG_029712.1	SYTL2	NA	NA	NA	NA	NA	NA	NA	NA	NA	NA	NA	NA
NG_029715.1	TP53I3	1.24824	1.23809	0.347906	0.328226	-1.06245	0.0172623	0.762305	-0.150194	1.04143	1.0041	0.0172623	-0.00273006
NG_029721.1	SH3D19	-0.578344	-0.579182	-1.70534	-1.73738	1.11104	1.51662	0.713586	-0.149303	-0.665691	-0.702179	1.51662	1.49076
NG_029724.1	KIF1A	-0.530312	-0.523637	-1.02613	-1.03854	-0.500232	1.62089	-0.378327	-0.148731	1.87689	1.85686	1.62089	1.6035
NG_029726.1	DNM1	0.198875	0.21214	-2.25327	-2.29536	0.189231	0.0198008	0.436556	-0.148371	0.68032	0.659226	0.0198008	-0.00437634
NG_029728.1	PRKACB	-0.652267	-0.635156	1.53399	1.51472	0.17523	-0.757987	0.119607	-0.148207	1.8595	1.83069	-0.757987	-0.768493
NG_029729.1	ALCAM	-0.675836	-0.670536	-1.20562	-1.23617	0.227924	1.49889	-0.114389	-0.147991	-0.17072	-0.198305	1.49889	1.49406
NG_029731.1	CLCN3	0.220741	0.233198	-2.70549	-2.65503	0.101416	-1.93686	0.365165	-0.147074	0.557445	0.523225	-1.93686	-1.90993
NG_029734.1	SLC24A2	NA	NA	NA	NA	NA	NA	NA	NA	NA	NA	NA	NA
NG_029742.1	ERLEC1	-0.671925	-0.665128	1.47153	1.46021	1.08752	1.65685	-0.445542	-0.14657	-0.58024	-0.605187	1.65685	1.64097
NG_029751.1	PSPC1	NA	NA	NA	NA	NA	NA	NA	NA	NA	NA	NA	NA
NG_029752.2	STARD13	1.40078	1.406	-0.682449	-0.69951	0.00307728	1.1448	-0.358592	-0.142865	2.02195	1.98244	1.1448	1.11328
NG_029754.1	TRAPPC1	0.0627182	0.0752294	0.748359	0.730816	0.190048	-0.0303961	0.464678	-0.142047	-0.382087	-0.410869	-0.0303961	-0.0548632
NG_029755.1	AGAP2	NA	NA	NA	NA	NA	NA	NA	NA	NA	NA	NA	NA
NG_029759.2	BICC1	2.11701	2.19697	0.0656595	0.0595226	-1.00754	-1.39782	2.13986	-0.139404	0.541025	0.54263	-1.39782	-1.4526
NG_029760.1	ZNF644	0.978022	0.989045	-1.47882	-1.50266	0.694454	0.0302016	0.0612622	-0.133919	-0.587922	-0.621909	0.0302016	0.000608235
NG_029763.1	ASIC2	-0.987185	-0.968773	-0.352053	-0.382951	-2.45516	0.764774	0.72589	-0.133865	1.13488	1.08597	0.764774	0.722366
NG_029764.1	AKT3	NA	NA	NA	NA	NA	NA	NA	NA	NA	NA	NA	NA
NG_029766.1	KIF13A	0.5781	0.584747	-2.04387	-2.06045	0.242042	0.532597	0.442068	-0.13099	1.12136	1.10638	0.532597	0.518586
NG_029768.1	SPECC1	0.543688	0.546727	-0.872392	-0.879931	0.631718	-2.00985	0.851134	-0.127894	0.742674	0.705223	-2.00985	-2.00884
NG_029769.1	ROCK2	-1.22889	-1.2224	-0.382847	-0.402276	-1.12458	0.608779	-0.3657	-0.123022	0.983572	0.958258	0.608779	0.586212
NG_029770.1	APLP2	-0.847355	-0.839495	-0.956656	-0.974976	0.69495	0.854356	0.846493	-0.122758	0.786862	0.777903	0.854356	0.848103
NG_029771.1	MARK2	0.57977	0.58758	-1.85094	-1.88373	0.553424	-0.887891	0.946576	-0.122327	0.599943	0.566939	-0.887891	-0.922976
NG_029773.1	ATF6	-0.127159	-0.121072	1.25891	1.24298	0.192075	1.88761	0.0393953	-0.118247	-0.675368	-0.691074	1.88761	1.86627
NG_029776.1	CDON	1.10876	1.11937	-0.298413	-0.317648	1.18084	1.48088	-0.116567	-0.11381	-1.00222	-1.03284	1.48088	1.464
NG_029777.1	KCNH1	-0.935043	-0.898846	-1.49365	-1.4799	-0.0670056	-1.28723	0.406442	-0.113673	1.43919	1.4013	-1.28723	-1.28252
NG_029778.1	MAGI1	0.238262	0.259019	-1.17023	-1.1901	0.2386	1.02759	-0.145082	-0.113642	-1.69567	-1.72745	1.02759	1.00238
NG_029780.1	XRCC5	1.38812	1.3868	-3.12114	-3.1037	1.35338	-0.366095	0.00067772	-0.112855	1.6171	1.5926	-0.366095	-0.373309
NG_029781.1	GRM7	NA	NA	NA	NA	NA	NA	NA	NA	NA	NA	NA	NA
NG_029784.1	ESRRG	-0.0164756	-0.00786149	-0.526127	-0.543284	-0.0836795	1.58915	0.416257	-0.108189	-0.41657	-0.443818	1.58915	1.55092
NG_029785.1	LMO3	0.722264	0.740571	-1.19539	-1.21423	0.814057	0.534817	-2.30044	-0.101983	0.925642	0.903994	0.534817	0.515878
NG_029786.1	DHDDS	0.652378	0.651577	0.887513	0.853806	0.643619	-2.19082	-0.323023	-0.101815	-0.352113	-0.350487	-2.19082	-2.12209
NG_029787.1	MVB12B	NA	NA	NA	NA	NA	NA	NA	NA	NA	NA	NA	NA
NG_029792.1	CIT	NA	NA	NA	NA	NA	NA	NA	NA	NA	NA	NA	NA
NG_029795.1	ETV1	0.489013	0.506778	-0.216842	-0.234102	0.601022	0.66111	1.06605	-0.101554	1.32773	1.30469	0.66111	0.640177
NG_029807.1	RAP1GAP	NA	NA	NA	NA	NA	NA	NA	NA	NA	NA	NA	NA
NG_029808.1	SMG7	-1.33616	-1.34819	0.749345	0.728317	-1.05268	0.960459	1.10168	-0.100265	-0.405231	-0.421168	0.960459	0.933514
NG_029810.1	CHST11	0.0939302	0.104984	-1.86467	-1.89641	0.520179	0.233251	0.126884	-0.0983627	0.673657	0.649	0.233251	0.209525
NG_029811.1	CHST1	-1.52366	-1.52312	1.12149	1.10191	-2.20507	0.707913	0.243814	-0.0917342	0.2047	0.176847	0.707913	0.683297
NG_029817.1	SPTBN1	-0.139518	-0.129982	0.991213	0.974322	0.578155	0.0202153	0.779263	-0.0899939	-0.713116	-0.73999	0.0202153	-0.00267433
NG_029821.1	RAB6A	-0.554911	-0.547881	-0.597732	-0.605534	1.18264	1.23862	1.0492	-0.0885864	-0.89726	-0.908971	1.23862	1.21752
NG_029822.1	RARG	0.68635	0.702075	-0.546285	-0.567009	-0.26961	0.217899	-0.114114	-0.0873844	1.98962	1.98165	0.217899	0.198481
NG_029825.1	USP2	0.574716	0.586828	-1.49869	-1.52062	-1.90372	0.67417	0.938505	-0.0792455	0.963229	0.953041	0.67417	0.66457
NG_029828.1	CHST2	-0.950015	-0.940696	0.316634	0.302888	1.57026	-0.290471	-1.16336	-0.0785184	-0.403021	-0.423546	-0.290471	-0.30814
NG_029829.1	CEP57	NA	NA	NA	NA	NA	NA	NA	NA	NA	NA	NA	NA
NG_029830.1	MAX	0.179165	0.193352	0.0706923	0.0391826	0.962878	-2.11898	0.693163	-0.0756134	1.34726	1.28918	-2.11898	-2.13846
NG_029831.1	CRTAC1	0.745144	0.755114	-0.517682	-0.521527	-0.697057	0.637697	1.05004	-0.0741853	0.651944	0.643523	0.637697	0.631081
NG_029836.1	KCNIP2	NA	NA	NA	NA	NA	NA	NA	NA	NA	NA	NA	NA
NG_029838.1	SMTN	-0.399332	-0.375636	-1.16277	-1.14439	-0.785879	-1.72172	-1.17927	-0.0718163	-0.58529	-0.586464	-1.72172	-1.69533
NG_029839.1	CMIP	-1.10919	-1.09242	1.00688	0.98259	-0.0443068	1.00169	-0.9077	-0.0685356	1.32496	1.29124	1.00169	0.973389
NG_029844.1	KAZN	0.150329	0.161641	-2.1406	-2.16122	0.140061	0.441093	0.112099	-0.0683853	-0.168797	-0.199097	0.441093	0.414929
NG_029846.1	SSH1	0.302971	0.311698	-0.813646	-0.833677	0.634501	1.99039	-0.716687	-0.0682232	1.63172	1.6096	1.99039	1.97254
NG_029850.1	HNRNPM	0.951482	0.961461	0.59644	0.581267	-1.38676	0.930155	1.08789	-0.0673357	-0.499858	-0.526156	0.930155	0.911876
NG_029852.1	TSC22D1	NA	NA	NA	NA	NA	NA	NA	NA	NA	NA	NA	NA
NG_029859.1	LIMA1	0.949147	0.958877	-1.58687	-1.60634	0.154707	1.03534	-1.80641	-0.0663547	-0.307539	-0.341699	1.03534	1.00112
NG_029860.1	ANKS1B	0.377658	0.386583	0.903269	0.863702	-0.207674	0.831385	0.328944	-0.0614276	-0.350422	-0.385508	0.831385	0.78526
NG_029861.1	MSH4	-0.0192773	-0.00844528	-0.962201	-0.982267	0.315976	1.48298	-0.384744	-0.0593842	-0.713594	-0.740264	1.48298	1.468
NG_029862.1	TRA2B	0.388535	0.420667	-1.32858	-1.33955	0.494284	1.04339	0.585424	-0.0567567	0.896647	0.909308	1.04339	1.06173
NG_029864.1	UBTF	-0.830932	-0.822355	-0.479249	-0.496149	1.21098	1.11822	1.22641	-0.0560785	0.784766	0.763032	1.11822	1.10066
NG_029865.2	PIAS2	0.0501833	0.0605507	0.963462	0.946	-0.610101	0.660429	0.828423	-0.0554193	0.360744	0.332002	0.660429	0.636307
NG_029867.1	RPL18	-0.923613	-0.928952	-0.574702	-0.595121	0.67969	1.01745	1.16224	-0.0545056	0.829475	0.826135	1.01745	1.01992
NG_029869.1	ADCYAP1R1	NA	NA	NA	NA	NA	NA	NA	NA	NA	NA	NA	NA
NG_029872.1	ABLIM1	NA	NA	NA	NA	NA	NA	NA	NA	NA	NA	NA	NA
NG_029874.2	ADAM23	NA	NA	NA	NA	NA	NA	NA	NA	NA	NA	NA	NA
NG_029882.1	CYTH3	NA	NA	NA	NA	NA	NA	NA	NA	NA	NA	NA	NA
NG_029883.1	DAPK1	-0.0458341	-0.0419682	-0.488095	-0.502838	1.62713	-0.363596	-0.359671	-0.0543745	1.07293	1.05079	-0.363596	-0.382121
NG_029885.1	GIT2	-0.0276416	-0.0187661	-1.4993	-1.51639	0.441993	0.652365	0.768604	-0.0531281	0.338048	0.309954	0.652365	0.62728
NG_029886.1	GLRX3	0.730696	0.73412	1.21677	1.19738	-1.26167	0.937046	-0.510748	-0.0523797	0.968566	0.940194	0.937046	0.911872
NG_029890.1	INPP4A	NA	NA	NA	NA	NA	NA	NA	NA	NA	NA	NA	NA
NG_029891.1	INPP5K	1.08114	1.08653	-1.40229	-1.4066	0.146967	-0.622494	1.05034	-0.0493464	-0.958955	-0.969477	-0.622494	-0.63226
NG_029892.2	KCNJ6	NA	NA	NA	NA	NA	NA	NA	NA	NA	NA	NA	NA
NG_029895.1	LIMK2	0.584812	0.590724	0.610917	0.595131	0.397448	0.0839714	0.597428	-0.0490881	0.239358	0.218053	0.0839714	0.0665654
NG_029898.1	NRCAM	NA	NA	NA	NA	NA	NA	NA	NA	NA	NA	NA	NA
NG_029900.1	PAK1	0.637677	0.641717	-0.91626	-0.927909	-1.09372	1.01258	0.532449	-0.0482227	-1.08947	-1.10754	1.01258	0.985989
NG_029905.1	SPTBN4	0.377382	0.385898	0.10335	0.0892226	-0.00558788	0.104911	0.126269	-0.0478829	0.341855	0.318838	0.104911	0.0860227
NG_029906.1	SRSF6	0.451151	0.460759	0.684901	0.674538	0.283289	0.34333	0.272331	-0.04725	0.873016	0.855906	0.34333	0.328016
NG_029908.1	TFCP2	0.93859	0.948201	-1.89549	-1.91038	-1.06662	0.582131	0.38437	-0.0459137	-0.385787	-0.40979	0.582131	0.561725
NG_029911.1	TPD52L1	0.531779	0.539872	1.64432	1.63099	-1.27068	-1.26597	0.967829	-0.0436956	0.157432	0.131608	-1.26597	-1.29263
NG_029917.1	ANK3	0.556179	0.561706	-2.32275	-2.3389	0.548642	1.05813	-0.839017	-0.0404728	1.23464	1.21143	1.05813	1.038
NG_029919.1	BRWD1	-0.544016	-0.530477	-0.757322	-0.802541	-0.552629	1.71625	0.116682	-0.0399595	1.99283	1.96167	1.71625	1.68885
NG_029924.1	CKAP5	2.75068	2.72936	-1.07841	-1.0761	-0.332676	0.112959	0.107821	-0.0393184	-0.120043	-0.141012	0.112959	0.0920588
NG_029930.1	DHX9	NA	NA	NA	NA	NA	NA	NA	NA	NA	NA	NA	NA
NG_029933.1	IL16	0.543596	0.55592	1.00542	0.993976	0.143524	0.817484	1.07279	-0.038538	0.709325	0.689041	0.817484	0.800665
NG_029938.1	NFASC	0.422638	0.427395	0.724133	0.702798	-1.09393	0.480197	0.0481222	-0.0375982	0.527662	0.496886	0.480197	0.452933
NG_029940.1	PTPRB	0.255145	0.264803	0.381201	0.362608	0.804038	0.569957	-0.71811	-0.036175	-1.09583	-1.11857	0.569957	0.545545
NG_029948.2	TACC2	NA	NA	NA	NA	NA	NA	NA	NA	NA	NA	NA	NA
NG_029954.1	NEDD4L	0.964141	0.967497	1.26919	1.24692	-1.06604	-0.595209	0.834195	-0.0347156	0.854879	0.826562	-0.595209	-0.614808
NG_029955.1	RBM39	NA	NA	NA	NA	NA	NA	NA	NA	NA	NA	NA	NA
NG_029960.1	ZMYND11	NA	NA	NA	NA	NA	NA	NA	NA	NA	NA	NA	NA
NG_029962.1	ZNF655	NA	NA	NA	NA	NA	NA	NA	NA	NA	NA	NA	NA
NG_029966.1	PTPRN2	0.423585	0.427555	-2.80202	-2.80591	0.816905	-0.444221	-0.0954048	-0.0334013	1.6252	1.61247	-0.444221	-0.453287
NG_029967.1	TIA1	NA	NA	NA	NA	NA	NA	NA	NA	NA	NA	NA	NA
NG_029968.1	FZD8	-0.554991	-0.549717	-0.427615	-0.450165	2.14074	-0.38254	-0.801761	-0.0332371	0.565985	0.537463	-0.38254	-0.409871
NG_029972.1	PIANP	-0.768496	-0.759181	-1.05769	-1.07878	-1.35352	-0.614529	1.41412	-0.0318888	-0.559325	-0.584144	-0.614529	-0.636932
NG_029982.1	PRKG1	-2.86522	-2.8739	1.07052	1.01809	-0.403852	-1.02302	0.152194	-0.0316743	1.41759	1.34487	-1.02302	-1.08891
NG_030010.1	TRRAP	NA	NA	NA	NA	NA	NA	NA	NA	NA	NA	NA	NA
NG_030011.1	ITGB3BP	NA	NA	NA	NA	NA	NA	NA	NA	NA	NA	NA	NA
NG_030012.1	LUC7L2	-0.233858	-0.212704	0.451015	0.423906	-0.0301853	0.350875	0.523936	-0.0299169	1.0573	1.02138	0.350875	0.310698
NG_030013.1	BCAN	NA	NA	NA	NA	NA	NA	NA	NA	NA	NA	NA	NA
NG_030015.1	STARD3NL	-0.144583	-0.130764	-0.296019	-0.309369	-1.34104	-0.56399	1.16614	-0.028333	1.58983	1.54067	-0.56399	-0.578817
NG_030016.1	LRRN3	-0.834961	-0.837743	0.584578	0.573451	0.426448	1.04692	2.00601	-0.0275866	-0.390663	-0.424655	1.04692	1.03633
NG_030017.1	SYNJ1	0.438582	0.448862	-2.05597	-2.08954	-1.08381	0.923144	0.664672	-0.0255198	1.04219	1.03263	0.923144	0.914872
NG_030018.1	SH3GLB1	1.18816	1.20018	0.981205	0.9623	-0.980762	-0.62472	-1.17156	-0.0243993	1.09891	1.07088	-0.62472	-0.658915
NG_030019.1	HMGN2P9	NA	NA	NA	NA	NA	NA	NA	NA	NA	NA	NA	NA
NG_030020.1	DPYSL2	-0.0864699	-0.0703957	1.12716	1.11638	1.148	1.26491	-0.123845	-0.01846	-1.12647	-1.17976	1.26491	1.24772
NG_030025.1	ABI1	NA	NA	NA	NA	NA	NA	NA	NA	NA	NA	NA	NA
NG_030026.1	HIVEP3	-0.548156	-0.535807	-1.3469	-1.36933	-0.757168	1.58356	1.37235	-0.0179371	0.972153	0.934349	1.58356	1.54942
NG_030027.1	ARID5B	-0.430669	-0.423587	-0.569619	-0.579593	-0.869296	1.82785	-0.253468	-0.0169065	-0.318945	-0.3359	1.82785	1.80992
NG_030032.1	HSPBAP1	1.67444	1.6961	-0.783347	-0.804351	-1.46387	1.38711	1.93365	-0.0164591	-0.176338	-0.201677	1.38711	1.37546
NG_030033.1	PDE3A	NA	NA	NA	NA	NA	NA	NA	NA	NA	NA	NA	NA
NG_030034.1	STX5	1.19494	1.20057	-1.67987	-1.70254	0.502054	0.788879	0.652481	-0.0161289	0.478493	0.459272	0.788879	0.773872
NG_030039.1	FGGY	NA	NA	NA	NA	NA	NA	NA	NA	NA	NA	NA	NA
NG_030048.1	CACNB3	-1.17625	-1.17166	-1.61369	-1.6281	0.773011	1.16441	0.538605	-0.0135151	0.113787	0.093574	1.16441	1.14698
NG_030312.1	DAB2	0.198641	0.207894	-0.591464	-0.606151	-2.08154	0.852429	0.569073	-0.0113147	1.59649	1.56898	0.852429	0.829713
NG_030314.1	TNRC17	0.0223889	0.0370621	-0.667017	-0.673411	1.81918	0.460335	-0.264355	-0.0110019	-0.407972	-0.423486	0.460335	0.443498
NG_030324.1	MGAT5	0.169986	0.173414	-0.990326	-1.01024	0.324796	-0.645145	0.65882	-0.00979203	-0.744964	-0.772777	-0.645145	-0.670004
NG_030328.1	NRP1	NA	NA	NA	NA	NA	NA	NA	NA	NA	NA	NA	NA
NG_030329.1	GAREM1	-0.0946582	-0.088903	1.79594	1.78488	0.115042	0.677294	-1.21395	-0.0075625	-1.751	-1.77417	0.677294	0.660569
NG_030330.1	PPP1R1B	NA	NA	NA	NA	NA	NA	NA	NA	NA	NA	NA	NA
NG_030333.1	NFIC	1.05658	1.04085	-1.27403	-1.2699	-0.379099	-0.415402	-1.03003	-0.00731124	0.497967	0.441166	-0.415402	-0.442469
NG_030334.1	RASGRF2	NA	NA	NA	NA	NA	NA	NA	NA	NA	NA	NA	NA
NG_030335.1	SEL1L	0.662677	0.672318	-3.08997	-3.10766	0.564986	0.0835466	0.263644	-0.00275523	0.846511	0.822453	0.0835466	0.0624281
NG_030339.2	MARK3	NA	NA	NA	NA	NA	NA	NA	NA	NA	NA	NA	NA
NG_030340.1	AFF4	0.277214	0.2894	-2.50145	-2.5369	-2.32795	1.08168	0.864365	-0.000462726	0.171745	0.143633	1.08168	1.06319
NG_030341.1	NACA	1.52277	1.54479	-1.2464	-1.29096	-0.678586	1.3651	-0.141645	0.00181517	1.27959	1.2732	1.3651	1.36286
NG_030343.1	RBPJ	-1.24206	-1.2185	-0.0906522	-0.104144	0.722964	0.328996	0.575609	0.00281196	0.156883	0.133954	0.328996	0.309296
NG_030346.1	TRIM41	NA	NA	NA	NA	NA	NA	NA	NA	NA	NA	NA	NA
NG_030347.1	NAV2	NA	NA	NA	NA	NA	NA	NA	NA	NA	NA	NA	NA
NG_030349.2	MIA2	1.35212	1.35577	-0.957998	-0.982491	-0.606326	1.6388	1.5745	0.00320118	0.0909148	0.0550355	1.6388	1.60473
NG_030352.1	RPL21P1	-1.75846	-1.75743	0.565561	0.552944	0.666021	0.881396	-0.565923	0.00582468	0.95722	0.938018	0.881396	0.865017
NG_030353.1	SALL3	NA	NA	NA	NA	NA	NA	NA	NA	NA	NA	NA	NA
NG_030354.1	ASAP1-IT1	0.762503	0.757097	-0.262443	-0.277227	0.197035	-0.280931	-0.076005	0.00675684	0.245	0.219497	-0.280931	-0.299626
NG_030365.1	POU2F2	0.16961	0.189175	-2.59209	-2.56285	1.14048	-0.19272	-0.721315	0.00701048	0.0228	-0.0114074	-0.19272	-0.217557
NG_030368.1	TRPC3	NA	NA	NA	NA	NA	NA	NA	NA	NA	NA	NA	NA
NG_030369.1	TRPC1	0.732362	0.770686	-0.988804	-1.04028	0.504454	1.48516	1.37379	0.00761855	-0.849623	-0.913495	1.48516	1.47457
NG_030371.1	VIPR1	NA	NA	NA	NA	NA	NA	NA	NA	NA	NA	NA	NA
NG_030373.1	GTF3C3	0.73488	0.750834	1.08679	1.06953	-1.64865	1.07167	1.49113	0.00774996	-1.1498	-1.17732	1.07167	1.04874
NG_030377.1	STYX	0.413374	0.444291	-0.649017	-0.669172	0.841877	0.29598	0.670049	0.00847772	1.99747	1.93922	0.29598	0.257215
NG_030394.1	RBM14	NA	NA	NA	NA	NA	NA	NA	NA	NA	NA	NA	NA
NG_030403.1	RBM5	0.829089	0.830392	0.817236	0.803188	-1.05328	0.910711	-0.187129	0.00996288	1.06098	1.04192	0.910711	0.893286
NG_030404.1	NUDT6	NA	NA	NA	NA	NA	NA	NA	NA	NA	NA	NA	NA
NG_030414.1	SPOCK3	NA	NA	NA	NA	NA	NA	NA	NA	NA	NA	NA	NA
NG_030415.1	SLC30A5	-0.277144	-0.266342	1.14264	1.13902	0.84574	0.934686	1.01584	0.0122552	-0.544325	-0.572254	0.934686	0.924118
NG_030416.2	RIC3	-0.167722	-0.162883	0.445161	0.430252	-1.36069	0.369893	0.615309	0.0125903	0.662569	0.641756	0.369893	0.349693
NG_030437.1	RCAN2	1.73209	1.73008	-0.227798	-0.240056	0.456055	-0.483189	0.0386295	0.0126197	2.00458	1.97628	-0.483189	-0.498608
NG_030438.1	TRDN	NA	NA	NA	NA	NA	NA	NA	NA	NA	NA	NA	NA
NG_030439.1	PAPOLA	NA	NA	NA	NA	NA	NA	NA	NA	NA	NA	NA	NA
NG_030461.1	ACIN1	-0.0683638	-0.0278444	-0.839084	-0.878908	-2.38576	0.643582	0.919812	0.0134122	0.185644	0.106757	0.643582	0.570372
NG_030484.1	ADK	1.53252	1.55948	-0.112173	-0.140934	-0.884824	0.91976	1.29678	0.0136323	-1.41984	-1.4696	0.91976	0.887449
NG_030588.1	LUZP2	NA	NA	NA	NA	NA	NA	NA	NA	NA	NA	NA	NA
NG_031806.2	GOSR2	0.0167696	0.0358826	-0.0534792	-0.0612195	0.780435	-0.218613	0.260891	0.0154594	1.87986	1.86777	-0.218613	-0.231823
NG_031813.1	WDR19	0.412293	0.416868	0.240632	0.215165	-1.0208	-0.628347	-0.504683	0.0166353	1.18731	1.15378	-0.628347	-0.659024
NG_031822.1	ERBIN	-0.337822	-0.327929	1.2001	1.18451	-0.508812	1.56059	-0.519264	0.0169581	2.02846	2.00513	1.56059	1.54026
NG_031823.1	SLA2	1.26078	1.27055	2.32863	2.32092	-0.918427	-0.657018	1.23167	0.0201579	-1.32541	-1.35391	-0.657018	-0.680177
NG_031835.1	RXFP1	0.0392962	0.041999	0.320346	0.310836	-1.72834	1.20003	1.03712	0.0206985	-0.317345	-0.331	1.20003	1.18868
NG_031847.1	SRA1	0.932904	0.93584	1.16669	1.1395	-1.31684	-1.82233	0.816682	0.0226654	-0.12661	-0.149395	-1.82233	-1.8243
NG_031853.2	EPB41L1	-0.0357578	-0.0275082	0.145996	0.127266	-2.27461	0.438102	0.637703	0.0250496	0.242352	0.215421	0.438102	0.414548
NG_031854.1	GRIN2B	2.17023	2.13973	-1.00092	-1.03955	0.821458	0.0462137	0.367983	0.0259844	-0.849787	-0.906679	0.0462137	-0.0101472
NG_031857.1	PTPRO	-0.174056	-0.175615	-0.330428	-0.364419	0.472913	-1.11703	2.2767	0.0279208	2.75468	2.74917	-1.11703	-1.16635
NG_031860.1	ARG1	0.818928	0.840475	0.824205	0.815943	-0.675315	1.53578	-1.0533	0.0293656	-0.508938	-0.54175	1.53578	1.52979
NG_031861.1	CACNG2	0.626954	0.634176	-0.798637	-0.814266	-1.237	-0.999175	1.45645	0.0315232	-0.241892	-0.278697	-0.999175	-1.02025
NG_031863.1	B3GAT3	0.565644	0.580715	1.1183	1.09435	0.493615	0.228707	0.193436	0.034417	0.350417	0.318073	0.228707	0.200937
NG_031871.1	ATP5F1E	-0.421221	-0.413443	1.92657	1.92184	0.903319	1.59725	-0.0447703	0.0347942	-1.03952	-1.05854	1.59725	1.58771
NG_031875.1	AP4E1	0.993732	1.0042	0.362999	0.351376	0.257703	1.57927	0.714685	0.035515	-0.69185	-0.720041	1.57927	1.57533
NG_031877.1	IGFBP7	-0.568276	-0.56585	2.19603	2.19356	-0.686752	2.05031	0.184438	0.0378412	-0.388868	-0.41076	2.05031	2.04316
NG_031878.2	PDE10A	NA	NA	NA	NA	NA	NA	NA	NA	NA	NA	NA	NA
NG_031890.1	ASCC1	-0.135705	-0.127268	-1.67757	-1.70295	0.27774	0.488144	0.710402	0.0394672	1.28966	1.2723	0.488144	0.469627
NG_031913.1	AP4S1	1.0553	1.07597	0.950577	0.916472	0.0554031	-0.207093	-0.5728	0.0416049	1.01531	0.962753	-0.207093	-0.257357
NG_031915.2	SPECC1L	NA	NA	NA	NA	NA	NA	NA	NA	NA	NA	NA	NA
NG_031923.1	PHLPP1	NA	NA	NA	NA	NA	NA	NA	NA	NA	NA	NA	NA
NG_031929.1	P3H2	0.684879	0.687808	-1.23841	-1.25075	-0.73583	1.09046	-0.0331746	0.0421086	-0.986261	-1.00574	1.09046	1.0665
NG_031930.1	PRICKLE2	1.19056	1.19615	-1.04775	-1.04895	0.827263	0.317708	1.02891	0.0426938	0.0580629	0.0464979	0.317708	0.307156
NG_031932.1	CNNM2	-0.265514	-0.252557	-1.273	-1.28957	-0.380592	2.08882	-0.804017	0.0453011	-0.190841	-0.214874	2.08882	2.07048
NG_031933.1	BMPER	1.62026	1.62764	-0.93792	-0.950946	1.62078	0.258952	1.07618	0.0453273	-0.0253655	-0.0452008	0.258952	0.242182
NG_031944.1	CCDC88A	NA	NA	NA	NA	NA	NA	NA	NA	NA	NA	NA	NA
NG_031957.1	IFT43	0.713432	0.733873	0.659517	0.619716	0.273528	-0.664412	1.7117	0.0460966	0.65172	0.593289	-0.664412	-0.715494
NG_031959.2	MED26	NA	NA	NA	NA	NA	NA	NA	NA	NA	NA	NA	NA
NG_031962.1	SYT14	-0.263881	-0.247179	-1.20192	-1.22571	0.471976	-0.485786	0.338251	0.0464344	-1.20904	-1.24677	-0.485786	-0.521987
NG_031968.2	SLC24A1	0.0376219	0.0615565	-1.25678	-1.28177	0.167069	0.750634	-0.373959	0.0474323	-0.628917	-0.674864	0.750634	0.703925
NG_031972.1	SMCHD1	-0.146826	-0.139676	1.20778	1.17944	0.554989	-1.03103	-0.397102	0.0488	1.73521	1.69508	-1.03103	-1.05426
NG_031973.2	ANKRD26	NA	NA	NA	NA	NA	NA	NA	NA	NA	NA	NA	NA
NG_031974.1	DNAAF9	NA	NA	NA	NA	NA	NA	NA	NA	NA	NA	NA	NA
NG_031988.1	S100PBP	NA	NA	NA	NA	NA	NA	NA	NA	NA	NA	NA	NA
NG_031991.1	BBC3	2.83335	2.81863	-1.29224	-1.31219	-0.026665	-0.630783	-0.123056	0.0493881	1.30493	1.26597	-0.630783	-0.65949
NG_032003.1	ANKRD11	1.02673	1.0225	0.975101	0.968025	0.905047	0.966359	1.01417	0.0534769	1.05412	1.04212	0.966359	0.956062
NG_032011.2	KCND3	NA	NA	NA	NA	NA	NA	NA	NA	NA	NA	NA	NA
NG_032024.1	CACNA1G	1.62338	1.62825	-1.37917	-1.39868	-1.43154	-0.667606	0.949488	0.0560637	0.916765	0.889271	-0.667606	-0.691835
NG_032029.1	MKNK1	0.526411	0.528614	-1.95844	-1.97547	-0.226359	0.642194	1.24644	0.0600678	1.27751	1.25022	0.642194	0.618237
NG_032035.1	RAB18	-0.693479	-0.689931	-0.385359	-0.405636	1.25999	1.37397	-0.117018	0.0601732	1.59028	1.58887	1.37397	1.37278
NG_032036.1	NCAM1	-1.01747	-0.982073	-0.457944	-0.494422	-0.801746	-0.697712	-0.961894	0.0660154	0.831469	0.75951	-0.697712	-0.745643
NG_032042.1	ANXA5	NA	NA	NA	NA	NA	NA	NA	NA	NA	NA	NA	NA
NG_032046.2	CHRM3	2.20251	2.20257	0.620351	0.590094	-1.04674	-0.106782	-0.896273	0.0663164	0.180246	0.140135	-0.106782	-0.143158
NG_032047.1	TSHZ1	-0.848541	-0.841192	0.484509	0.471587	-1.59326	1.01725	1.54698	0.0681222	0.12571	0.0939623	1.01725	1.00499
NG_032048.1	KAT6B	0.716371	0.742051	-1.52371	-1.54924	0.687921	1.48976	-1.56142	0.078856	0.0047139	-0.0231831	1.48976	1.47645
NG_032059.1	ERLIN2	0.174434	0.190593	-2.55811	-2.62159	-0.113611	0.669563	0.701597	0.0789849	1.36522	1.35919	0.669563	0.655682
NG_032072.1	MEGF10	-0.262392	-0.253099	-2.11662	-2.1064	-0.781249	0.364831	-0.668408	0.079506	0.199401	0.174567	0.364831	0.340725
NG_032073.1	GLCCI1	NA	NA	NA	NA	NA	NA	NA	NA	NA	NA	NA	NA
NG_032079.1	AGK	NA	NA	NA	NA	NA	NA	NA	NA	NA	NA	NA	NA
NG_032091.1	SETD2	1.06206	1.06337	-1.19593	-1.20218	0.317221	1.35874	-0.696652	0.0799059	1.44359	1.41604	1.35874	1.33421
NG_032093.2		1.07685	1.08852	-0.529091	-0.550922	0.349702	1.57404	-0.717607	0.0805185	0.801225	0.768569	1.57404	1.54566
NG_032108.1	PBRM1	0.91576	0.929822	-1.265	-1.28845	-0.977262	1.43047	-0.968476	0.0828001	-0.799067	-0.825573	1.43047	1.42673
NG_032111.1	RPL9	NA	NA	NA	NA	NA	NA	NA	NA	NA	NA	NA	NA
NG_032135.1	SRCAP	-0.0546042	-0.0462082	0.50407	0.49662	0.427918	0.907697	1.65262	0.0828101	-1.56665	-1.60272	0.907697	0.900326
NG_032143.1	ACO2	NA	NA	NA	NA	NA	NA	NA	NA	NA	NA	NA	NA
NG_032159.2	CRADD	-0.160294	-0.148747	-0.429051	-0.451404	0.326283	-0.23652	-0.269636	0.083194	0.733073	0.68294	-0.23652	-0.268565
NG_032161.1	SLC20A2	NA	NA	NA	NA	NA	NA	NA	NA	NA	NA	NA	NA
NG_032162.2	SMARCA2	0.936627	0.942441	-1.60313	-1.62939	-1.53055	1.14943	1.45593	0.0849874	-0.395626	-0.42687	1.14943	1.12574
NG_032163.1	SMARCE1	NA	NA	NA	NA	NA	NA	NA	NA	NA	NA	NA	NA
NG_032169.1	CUL3	-0.424442	-0.410453	-0.719343	-0.727742	-0.284485	-0.98475	0.627139	0.0871199	1.11606	1.08005	-0.98475	-0.995283
NG_032172.1	STK4	-1.03525	-1.01785	-1.92482	-1.92738	0.780039	-0.14708	-0.770967	0.0874532	0.510651	0.484268	-0.14708	-0.165973
NG_032569.1	KLHL3	-0.0159417	0.00484119	-1.07779	-1.09869	-3.24224	0.146432	0.137343	0.0889464	0.745532	0.715108	0.146432	0.119973
NG_032572.1	DIS3L2	NA	NA	NA	NA	NA	NA	NA	NA	NA	NA	NA	NA
NG_032663.1	SLC4A5	NA	NA	NA	NA	NA	NA	NA	NA	NA	NA	NA	NA
NG_032672.1	NDUFA12	1.84445	1.87939	-0.9683	-0.984557	-0.625649	1.67222	1.82574	0.0903098	-0.923524	-0.946509	1.67222	1.66183
NG_032674.1	EFTUD2	-1.52521	-1.48596	-0.956375	-0.946514	-1.65198	-0.978097	-1.16299	0.0909011	0.0630601	0.0450904	-0.978097	-0.97222
NG_032675.1	SLC4A8	0.344299	0.349307	0.816897	0.79208	0.281465	0.814117	0.448733	0.0928887	1.01366	0.97911	0.814117	0.784348
NG_032760.1	GAS1	NA	NA	NA	NA	NA	NA	NA	NA	NA	NA	NA	NA
NG_032763.1	ELAPOR1	0.673219	0.66963	-2.61019	-2.56828	0.407978	0.664118	0.748468	0.0939491	0.602229	0.573215	0.664118	0.635815
NG_032772.1	OFD1P17	0.359304	0.365853	1.12809	1.10597	0.392149	0.270262	-0.890194	0.0959091	1.62329	1.59152	0.270262	0.240626
NG_032777.1	SF3B4	1.522	1.54109	-1.27433	-1.29791	-1.46519	0.167636	-0.0112817	0.0965646	-0.178622	-0.207195	0.167636	0.144905
NG_032779.1	LARP7	-0.514732	-0.508276	-0.936623	-0.970331	1.47334	1.06987	1.13727	0.0966528	1.14545	1.16058	1.06987	1.08551
NG_032790.1	PLCB4	-1.45017	NA	1.17501	NA	NA	-1.76345	NA	0.0971889	-0.576125	NA	-1.76345	NA
NG_032795.1	GNAI3	0.690079	0.698576	-1.48448	-1.49607	-0.775412	0.593895	-0.462728	0.0993575	1.80614	1.74674	0.593895	0.552455
NG_032804.1	CFAP418	NA	NA	NA	NA	NA	NA	NA	NA	NA	NA	NA	NA
NG_032811.1	WDR81	1.02019	1.02549	-0.785693	-0.796337	-1.15605	0.779279	0.521893	0.100356	-1.37177	-1.38731	0.779279	0.760512
NG_032814.1	SLC16A6	1.52139	1.52596	-1.17982	-1.18564	2.31061	0.338193	-0.390238	0.101706	0.548292	0.526549	0.338193	0.3197
NG_032855.1	LRBA	-0.208466	-0.190817	-0.360332	-0.381782	-0.574742	2.39602	-0.728468	0.102595	0.303087	0.269438	2.39602	2.36792
NG_032868.1	RNF170	NA	NA	NA	NA	NA	NA	NA	NA	NA	NA	NA	NA
NG_032869.1	NNT	-1.00424	-0.997399	-0.483462	-0.506	1.45484	-0.759211	-0.38157	0.103133	-0.0518237	-0.0830392	-0.759211	-0.787001
NG_032870.1	CEP63	NA	NA	NA	NA	NA	NA	NA	NA	NA	NA	NA	NA
NG_032871.1	SLC25A25	0.886438	0.889382	1.04469	1.0297	-0.963145	0.533035	0.950174	0.103569	0.712306	0.691509	0.533035	0.514928
NG_032887.1	GABRG3	NA	NA	NA	NA	NA	NA	NA	NA	NA	NA	NA	NA
NG_032889.1	SERAC1	0.418664	0.419531	0.621851	0.601887	0.722478	-0.110336	0.58649	0.104746	0.34513	0.322678	-0.110336	-0.12626
NG_032901.2	PRPF40B	-1.51083	-1.50703	-1.36891	-1.4057	0.519089	0.752795	-0.292053	0.105301	0.819404	0.796505	0.752795	0.733569
NG_032904.1	U2AF2	NA	NA	NA	NA	NA	NA	NA	NA	NA	NA	NA	NA
NG_032907.1	SERPINE2	0.612879	0.61756	-0.462836	-0.47234	0.75026	-0.536433	1.49362	0.110379	0.23842	0.219854	-0.536433	-0.549736
NG_032925.2	NFIX	0.84244	0.850109	0.568225	0.555627	-1.62758	0.826445	0.729467	0.113747	0.117732	0.098685	0.826445	0.809942
NG_032931.1	PPM1K	-1.51633	-1.49327	-0.945117	-0.959044	0.734041	0.763131	0.612903	0.116285	1.20979	1.17479	0.763131	0.734539
NG_032937.1	RYK	NA	NA	NA	NA	NA	NA	NA	NA	NA	NA	NA	NA
NG_032939.2	FPGT	NA	NA	NA	NA	NA	NA	NA	NA	NA	NA	NA	NA
NG_032944.1	CAMKMT	2.09305	2.09741	0.29084	0.268416	0.303304	-1.02069	-0.91645	0.116907	-0.263751	-0.292827	-1.02069	-1.04575
NG_032945.1	PFN1	1.14026	1.1443	-1.25109	-1.27325	0.942187	1.06865	1.08805	0.116985	1.05693	1.04463	1.06865	1.05853
NG_032948.1	EMC1	0.686472	0.693579	0.921041	0.905821	0.454498	0.837787	1.09559	0.117433	0.638775	0.616747	0.837787	0.818415
NG_032959.1	GAS2L1	NA	NA	NA	NA	NA	NA	NA	NA	NA	NA	NA	NA
NG_032964.1	NBAS	1.77228	1.76445	-0.922813	-0.93876	0.549615	-0.431727	-0.578816	0.118439	0.730073	0.701213	-0.431727	-0.454118
NG_032965.1	KIAA1549	0.542049	0.546618	0.212795	0.202504	-0.502344	1.18305	0.602457	0.118899	1.04476	1.0305	1.18305	1.17082
NG_032968.1	NIN	0.616844	0.624927	-0.722701	-0.749244	-0.896248	-0.968813	0.634206	0.119748	1.72733	1.70833	-0.968813	-1.00228
NG_032972.2	ADAM3B	-0.389947	-0.387385	-0.462009	-0.486989	-0.819975	-0.686589	-0.937479	0.120929	1.81386	1.78189	-0.686589	-0.716996
NG_032999.1	CACNA1D	NA	NA	NA	NA	NA	NA	NA	NA	NA	NA	NA	NA
NG_033003.1	FARS2	-0.100483	-0.0844038	-0.642265	-0.662136	-0.0800693	1.72131	0.0707803	0.121151	0.253143	0.217113	1.72131	1.68352
NG_033012.1	PNPT1	NA	NA	NA	NA	NA	NA	NA	NA	NA	NA	NA	NA
NG_033013.1	TYRO3	0.970169	0.989056	0.29819	0.290431	0.641663	0.605188	0.569918	0.121324	0.723017	0.710463	0.605188	0.594813
NG_033014.1	UNC13B	-1.90391	-1.90238	-1.23527	-1.24345	-1.17595	0.368588	0.117056	0.121452	0.213415	0.190887	0.368588	0.348342
NG_033017.1	MBTPS1	1.05677	1.0581	-1.69651	-1.72436	0.95784	1.03262	1.08496	0.122005	1.20606	1.18277	1.03262	1.01155
NG_033030.1	MEGF8	NA	NA	NA	NA	NA	NA	NA	NA	NA	NA	NA	NA
NG_033031.1	RMND1	0.128756	0.139995	-1.53367	-1.56244	0.359173	0.800271	0.724777	0.124447	0.780484	0.760088	0.800271	0.783537
NG_033032.1	CEP164	0.860553	0.868257	0.231454	0.226122	-0.629232	-1.55354	1.44634	0.124587	0.963064	0.941402	-1.55354	-1.53962
NG_033036.1	AAMP	-0.613523	-0.605521	0.600443	0.589632	1.30379	0.968626	1.48088	0.124596	-1.09753	-1.11967	0.968626	0.954659
NG_033040.1	MAP4K2	NA	-1.41824	NA	-1.13915	-0.823135	NA	1.34447	NA	NA	1.37758	NA	0.928751
NG_033050.1	LHCGR	0.550644	0.566075	0.774385	0.751051	0.539599	0.677154	-0.0182323	0.125265	-1.11583	-1.14687	0.677154	0.64632
NG_033051.1	SNORD21	NA	NA	NA	NA	NA	NA	NA	NA	NA	NA	NA	NA
NG_033052.1	SERPIND1	NA	NA	NA	NA	NA	NA	NA	NA	NA	NA	NA	NA
NG_033067.1	PUS3	0.136892	0.150343	-0.412108	-0.437379	-2.35618	1.59367	1.02377	0.128741	0.877295	0.845415	1.59367	1.56913
NG_033073.1	ANGPTL3	-1.2992	-1.26777	1.57074	1.54002	-0.992723	-0.381499	-0.350009	0.129227	-0.359599	-0.377075	-0.381499	-0.395339
NG_033074.1	ISCA2	NA	NA	NA	NA	NA	NA	NA	NA	NA	NA	NA	NA
NG_033077.1	LRRN4CL	-0.928037	-0.921009	0.86814	0.86142	0.921662	0.809951	0.926818	0.130231	0.802709	0.791092	0.809951	0.800238
NG_033081.1	SLIT3	1.53228	1.52451	-0.11574	-0.126029	0.64738	-0.850683	0.779302	0.133482	-0.768487	-0.776804	-0.850683	-0.854173
NG_033084.1	NR1D1	0.741003	0.754188	0.596095	0.594958	-2.45695	0.506697	0.426431	0.134447	-0.522079	-0.543549	0.506697	0.500783
NG_033097.1	USP20	0.914371	0.925186	-1.51406	-1.52854	-1.39529	1.03402	1.47909	0.136747	0.99336	0.978664	1.03402	1.02187
NG_033099.1	BCS1L	NA	NA	NA	NA	NA	NA	NA	NA	NA	NA	NA	NA
NG_033102.1	TRAPPC11	0.646292	0.666482	-1.41652	-1.44583	-0.290015	0.66313	0.597232	0.136993	0.957301	0.939437	0.66313	0.646194
NG_033104.1	RTTN	NA	NA	NA	NA	NA	NA	NA	NA	NA	NA	NA	NA
NG_033111.1	DOLK	0.965032	0.982973	-2.41051	-2.44195	0.476423	0.93221	0.778859	0.137435	1.01192	1.00114	0.93221	0.923828
NG_033122.1	KIZ	NA	NA	NA	NA	NA	NA	NA	NA	NA	NA	NA	NA
NG_033127.1	DIXDC1	0.0828622	0.0930321	1.16986	1.14449	0.295337	-0.103408	-1.46784	0.137856	0.0834372	0.0615525	-0.103408	-0.120313
NG_033144.1	PIGN	1.20584	1.21118	-1.76455	-1.79047	0.39579	1.09138	0.47865	0.139933	0.0647107	0.0354652	1.09138	1.06902
NG_033149.1	RUSF1	0.9524	0.968184	-0.25768	-0.271422	0.569945	0.631299	1.02454	0.141073	0.799972	0.786933	0.631299	0.619764
NG_033153.1	MFF	NA	NA	NA	NA	NA	NA	NA	NA	NA	NA	NA	NA
NG_033169.1	PAK6	-1.60738	-1.57313	0.312905	0.294874	-0.319089	-1.32263	0.597086	0.142698	1.01258	0.977569	-1.32263	-1.32542
NG_033179.1	MICU1	0.879396	0.892932	-0.618795	-0.642856	1.20241	0.998647	-0.0706492	0.142939	2.32294	2.30792	0.998647	0.979043
NG_033219.2	B3GALNT2	-0.597948	-0.586405	-0.834226	-0.851988	-0.252581	-0.484975	0.751719	0.144576	1.21503	1.1919	-0.484975	-0.507399
NG_033226.1	YTHDF3	NA	NA	NA	NA	NA	NA	NA	NA	NA	NA	NA	NA
NG_033239.1	MTOR	1.35928	1.35859	0.326702	0.31657	-0.512517	-0.496646	1.57197	0.144785	1.89188	1.85725	-0.496646	-0.502476
NG_033266.2	TSPYL1	0.201795	0.213796	1.07271	1.05706	0.142832	0.271635	0.287858	0.144818	0.456331	0.431969	0.271635	0.250769
NG_033272.2	MIB1	0.274172	0.285762	-0.16605	-0.181464	0.27635	0.10401	0.284506	0.145094	0.738919	0.712855	0.10401	0.082803
NG_033796.2	SH2D1A	NA	NA	NA	NA	NA	NA	NA	NA	NA	NA	NA	NA
NG_033800.1	POLD1	1.13885	1.15234	-0.209132	-0.220366	-0.47614	1.01554	1.77741	0.145398	-0.0800363	-0.0960167	1.01554	1.00783
NG_033804.1	SRGAP2	0.127017	0.14179	0.440271	0.430724	-0.144613	0.800307	0.779044	0.145463	1.07506	1.06686	0.800307	0.79118
NG_033805.1	DVL1P1	NA	NA	NA	NA	NA	NA	NA	NA	NA	NA	NA	NA
NG_033820.1	KDM2B	0.531156	0.542297	-0.518739	-0.535504	0.708064	-1.59218	1.22535	0.146369	0.0157446	-0.01412	-1.59218	-1.61118
NG_033830.1	HNRNPA1	NA	NA	NA	NA	NA	NA	NA	NA	NA	NA	NA	NA
NG_033836.2	AGBL1	0.403231	0.406162	-0.502547	-0.492503	-0.512244	1.17493	-0.830816	0.146738	-0.397494	-0.389107	1.17493	1.23324
NG_033837.1	CCDC65	NA	NA	NA	NA	NA	NA	NA	NA	NA	NA	NA	NA
NG_033841.1	ZBTB18	0.347218	0.367212	-2.27164	-2.22148	0.536291	0.446095	0.631754	0.14788	0.608554	0.632576	0.446095	0.474455
NG_033843.1	DNAJC6	1.09328	1.09904	0.280142	0.261055	1.18145	1.58087	1.02162	0.148319	-0.697286	-0.725251	1.58087	1.55926
NG_033851.1	TCF12	0.950495	0.962589	0.791887	0.775874	1.06448	1.24597	0.949054	0.148916	1.56547	1.54028	1.24597	1.2244
NG_033857.1	SLC35A3	0.439486	0.439665	0.304366	0.270543	-0.916455	-1.28157	0.419754	0.149105	1.15185	1.10684	-1.28157	-1.32181
NG_033858.1	DCHS1	NA	NA	NA	NA	NA	NA	NA	NA	NA	NA	NA	NA
NG_033866.1	GNAL	NA	0.60364	NA	0.431679	-0.564119	NA	-0.275467	NA	NA	0.623755	NA	-0.248595
NG_033871.1	FBXO38	-1.01521	-1.01311	-0.796981	-0.817657	0.0732067	1.05873	1.71808	0.149754	1.9803	1.95235	1.05873	1.03375
NG_033875.1	DDHD2	NA	NA	NA	NA	NA	NA	NA	NA	NA	NA	NA	NA
NG_033876.1	ADAM10	0.700087	0.733481	1.30679	1.29868	-0.154295	0.173373	-0.482175	0.150254	-1.53804	-1.58121	0.173373	0.148705
NG_033878.1	DPP6	NA	NA	NA	NA	NA	NA	NA	NA	NA	NA	NA	NA
NG_033879.1	PUF60	1.18406	1.20517	-1.35224	-1.38271	-1.01502	0.969278	1.08393	0.150765	1.02026	1.01517	0.969278	0.965723
NG_033880.1	PTPRT	0.0416722	0.0467219	0.043113	0.0231611	0.416785	-0.423688	-0.625115	0.151367	-0.620672	-0.645072	-0.423688	-0.446
NG_033882.1	ADCY5	0.910513	0.920956	-0.567301	-0.595455	-1.59838	1.36409	1.33967	0.154255	0.225844	0.192485	1.36409	1.34201
NG_033884.1	KCNK3	NA	NA	NA	NA	NA	NA	NA	NA	NA	NA	NA	NA
NG_033885.1	RIT1	NA	NA	NA	NA	NA	NA	NA	NA	NA	NA	NA	NA
NG_033891.1	RAB28	0.502999	0.518338	0.557278	0.551665	-0.981909	0.473944	0.658224	0.157798	0.870235	0.861542	0.473944	0.46316
NG_033892.1	CTCF	NA	NA	NA	NA	NA	NA	NA	NA	NA	NA	NA	NA
NG_033893.1	MALT1	NA	NA	NA	NA	NA	NA	NA	NA	NA	NA	NA	NA
NG_033896.1	TUBB4A	0.239625	0.246664	-0.00368103	-0.0105826	0.496241	0.444203	0.819886	0.162239	0.35074	0.34129	0.444203	0.437389
NG_033899.1	GBA2	-1.36788	-1.3519	1.11271	1.10414	1.07328	-0.0163563	0.942507	0.162516	-0.675245	-0.691348	-0.0163563	-0.0295396
NG_033902.1	SNX10	0.30329	0.313539	0.777624	0.7516	0.182508	0.44903	0.3628	0.163324	0.192816	0.157678	0.44903	0.417416
NG_033906.1	POFUT1	-1.27344	-1.27925	-1.51626	-1.54789	-0.733731	1.59583	0.0811988	0.165097	0.164528	0.141024	1.59583	1.59048
NG_033910.1	VPS45	1.31938	1.32885	-1.75245	-1.77313	1.13216	1.3702	0.317894	0.166203	0.134813	0.10356	1.3702	1.34311
NG_033915.1	DUSP6	-0.856825	-0.848003	1.75581	1.73582	1.54523	0.356763	-0.872037	0.166798	1.73083	1.70173	0.356763	0.329995
NG_033932.1	TLN2	NA	-0.784609	NA	-1.16271	-0.840331	NA	-0.106492	NA	NA	1.96912	NA	-0.245813
NG_033942.1	CDK9	-0.678576	-0.663961	-1.81744	-1.8309	0.861726	-1.1562	0.761327	0.168238	1.05268	1.02058	-1.1562	-1.17732
NG_033944.1	EPHA7	-0.658278	-0.65439	-0.348222	-0.376927	0.35793	-0.646949	-1.06026	0.171575	-0.182943	-0.223932	-0.646949	-0.677847
NG_033946.1	FNBP1	NA	NA	NA	NA	NA	NA	NA	NA	NA	NA	NA	NA
NG_033948.1	KMT2C	NA	-0.0531402	NA	0.62588	0.526547	NA	0.536824	NA	NA	-1.16711	NA	-0.515818
NG_033949.1	KMT2E	0.254336	0.265968	1.05511	1.04696	0.532474	0.410338	0.168315	0.175987	-1.68854	-1.73141	0.410338	0.390718
NG_033950.2	ADGRL3	NA	-0.739293	NA	-1.74516	0.224811	NA	-0.45566	NA	NA	1.58549	NA	0.678333
NG_033952.1	MAP2K4	-0.141023	-0.13405	-1.50811	-1.5202	-0.420138	1.83793	0.245396	0.176529	2.00936	1.97761	1.83793	1.8098
NG_033956.1	NUP58	0.707924	0.737724	1.41865	1.41471	0.846921	1.33001	-0.569824	0.177081	1.4727	1.45406	1.33001	1.31487
NG_033960.1	PCMT1	1.41759	1.42094	-1.05438	-1.06438	-0.915534	-1.0617	1.41495	0.178757	1.15995	1.14382	-1.0617	-1.07541
NG_033961.1	PDCD6IP	-0.576044	-0.568945	-1.11323	-1.12562	-0.933951	1.14991	1.08369	0.18288	1.30733	1.28764	1.14991	1.1328
NG_033962.2	PDZD2	1.51049	1.52776	-1.28195	-1.30437	0.217165	1.72241	-1.02114	0.189274	-0.692922	-0.72246	1.72241	1.70435
NG_033963.1	PTPRD	-0.0890806	-0.0722868	-1.76151	-1.77797	0.919237	-1.19571	1.44684	0.190274	0.647291	0.598734	-1.19571	-1.22507
NG_033964.1	PTPRS	1.11533	1.12787	0.673406	0.658219	0.567679	-0.0213989	0.836429	0.191857	-0.0538905	-0.0801285	-0.0213989	-0.0437784
NG_033965.1	PTPRU	NA	NA	NA	NA	NA	NA	NA	NA	NA	NA	NA	NA
NG_033980.1	SMG6	1.1387	1.15283	-1.25824	-1.28361	0.910141	1.02991	-0.0870246	0.192348	1.09728	1.08536	1.02991	1.02041
NG_033983.1	AKAP5	NA	NA	NA	NA	NA	NA	NA	NA	NA	NA	NA	NA
NG_033985.1	ATL3	NA	NA	NA	NA	NA	NA	NA	NA	NA	NA	NA	NA
NG_033998.1	SVIL	0.303274	0.32321	-1.84378	-1.86445	-0.185971	-1.62219	-0.168234	0.193065	1.31884	1.30108	-1.62219	-1.64609
NG_034001.1	ARHGEF40	-1.76644	-1.74519	0.484687	0.468546	0.511389	0.61666	0.737553	0.195343	0.384155	0.3614	0.61666	0.595326
NG_034007.1	RPS6KL1	0.389026	0.405072	-2.19821	-2.22914	-0.0660978	0.265605	0.338682	0.197785	0.425077	0.407689	0.265605	0.250234
NG_034014.1	CDK2	-0.89779	-0.877683	-1.73398	-1.73741	0.5424	-0.388046	-0.0651148	0.203426	-0.283573	-0.315426	-0.388046	-0.414609
NG_034016.1	REPS1	NA	NA	NA	NA	NA	NA	NA	NA	NA	NA	NA	NA
NG_034020.1	HMGB1P4	NA	NA	NA	NA	NA	NA	NA	NA	NA	NA	NA	NA
NG_034024.1	DNAJB11	-0.400303	-0.389311	-0.358691	-0.372525	-0.627434	-0.205614	2.25041	0.20576	0.310384	0.295759	-0.205614	-0.222765
NG_034030.1	EFCAB2	NA	NA	NA	NA	NA	NA	NA	NA	NA	NA	NA	NA
NG_034036.1	MAST4	NA	NA	NA	NA	NA	NA	NA	NA	NA	NA	NA	NA
NG_034037.1	PEAK1	0.739216	0.739646	-0.672171	-0.685288	-0.79505	1.03055	-1.14877	0.207054	0.149036	0.12104	1.03055	0.998571
NG_034039.1	DOCK10	0.412731	0.422285	-0.843474	-0.874743	0.547714	-0.498389	0.408776	0.208092	1.38509	1.36577	-0.498389	-0.532466
NG_034041.1	SORBS1	0.00356874	0.0128839	0.099216	0.0802502	0.189012	0.622198	0.789741	0.20868	0.784726	0.752757	0.622198	0.594704
NG_034051.1	DYNC2I1	-0.747215	-0.747985	-0.0471619	-0.0680979	0.970196	0.689535	1.05839	0.210382	0.77447	0.753896	0.689535	0.671236
NG_034053.1	EIF2AK4	0.272308	0.280968	1.06707	1.05274	0.53745	0.203662	0.715691	0.213832	0.611176	0.587501	0.203662	0.181873
NG_034054.1	PTDSS1	NA	NA	NA	NA	NA	NA	NA	NA	NA	NA	NA	NA
NG_034055.1	CDIN1	1.45766	1.45458	-0.980572	-0.990805	0.70567	1.27659	0.340954	0.214542	-0.331977	-0.35919	1.27659	1.23712
NG_034057.2	TBCK	NA	NA	NA	NA	NA	NA	NA	NA	NA	NA	NA	NA
NG_034062.1	KCNH5	2.26933	2.24095	-0.019245	-0.0405344	-1.82757	0.734253	-0.703843	0.215623	0.158642	0.127221	0.734253	0.699222
NG_034067.1	DEPDC5	0.872432	0.883342	-1.37598	-1.3983	-0.894563	1.50787	1.6996	0.2164	-0.745857	-0.771692	1.50787	1.49925
NG_034068.1	IFT172	NA	0.651922	NA	0.534353	0.080634	NA	1.02376	NA	NA	-0.129162	NA	-0.0983971
NG_034070.1	CACNA2D2	0.617238	0.625233	0.73215	0.720946	0.136221	0.751843	0.560177	0.220437	0.685034	0.665316	0.751843	0.735805
NG_034072.1	CTNNA3	0.0750109	0.0908714	-2.0035	-1.99238	-0.840158	0.223413	0.687886	0.220928	-0.164461	-0.203972	0.223413	0.181892
NG_034075.1	AMPD2	-1.09191	-1.0919	0.557812	0.541992	-0.806576	1.32788	-0.299854	0.223267	-0.359333	-0.382662	1.32788	1.30857
NG_034077.1	MARS1	NA	NA	NA	NA	NA	NA	NA	NA	NA	NA	NA	NA
NG_034086.1	ELP4	2.07143	2.05853	0.452986	0.424949	-1.0013	-1.3879	-0.495411	0.224643	-0.352698	-0.384555	-1.3879	-1.40403
NG_034098.1	PLD3	NA	NA	NA	NA	NA	NA	NA	NA	NA	NA	NA	NA
NG_034100.1	CSPP1	0.821554	0.822793	0.899534	0.880413	0.242989	0.168063	0.947272	0.225519	0.208236	0.18354	0.168063	0.146495
NG_034107.1	ERCC6L2	NA	NA	NA	NA	NA	NA	NA	NA	NA	NA	NA	NA
NG_034108.1	OXSM	NA	NA	NA	NA	NA	NA	NA	NA	NA	NA	NA	NA
NG_034113.1	GRID2	0.363348	0.371795	-0.11505	-0.139259	-0.506034	0.97934	-0.263458	0.226082	1.07816	1.02743	0.97934	0.934407
NG_034115.1	POGLUT1	NA	0.52997	NA	-0.436129	-1.61338	NA	0.795751	NA	NA	1.05232	NA	0.766983
NG_034119.1	NR2F1	0.398086	0.43009	-2.10334	-2.12967	1.10124	0.341455	0.956859	0.226968	-0.732647	-0.768238	0.341455	0.317563
NG_034120.1	HFM1	0.932653	0.936622	1.25786	1.2422	0.0374848	1.20626	-1.36338	0.228956	0.109437	0.0856107	1.20626	1.18612
NG_034123.1	TNRC18	NA	0.188799	NA	-1.17021	-0.146667	NA	0.785657	NA	NA	0.965126	NA	0.495812
NG_034127.1	SPOCK1	0.02386	0.0330059	-1.54351	-1.54947	-0.477271	0.751239	-0.669771	0.230897	-0.700889	-0.71854	0.751239	0.728615
NG_034132.1	SETD5	0.41278	0.425574	0.4493	0.426475	-0.198152	0.689085	0.30371	0.231548	1.03788	1.00734	0.689085	0.66074
NG_034133.1	AUTS2	-0.510344	-0.489923	0.759414	0.704994	-1.25315	0.564172	1.03187	0.23219	-0.732125	-0.769723	0.564172	0.50405
NG_034145.1	DYRK1B	NA	NA	NA	NA	NA	NA	NA	NA	NA	NA	NA	NA
NG_034149.1	DARS1	1.4087	1.4237	-0.147262	-0.164244	1.07294	1.46957	1.16998	0.2356	1.70563	1.68565	1.46957	1.4522
NG_034153.2	RUBCN	NA	NA	NA	NA	NA	NA	NA	NA	NA	NA	NA	NA
NG_034154.1	DCAF8	-0.556678	-0.548545	-2.96412	-3.06293	0.896511	0.873599	0.396876	0.237355	-0.352613	-0.433978	0.873599	0.819262
NG_034158.1	AHDC1	0.620956	0.626176	-2.39312	-2.40544	-0.17102	0.979299	-0.386557	0.238079	0.442849	0.414623	0.979299	0.953512
NG_034164.1	STT3B	2.14151	2.11538	-0.409472	-0.423181	2.15901	-0.752449	-0.598863	0.238353	0.354003	0.324123	-0.752449	-0.768697
NG_034197.1	PPP1R9B	0.928636	0.935369	0.3627	0.351146	-1.7269	-0.668029	0.672241	0.238796	1.18137	1.16315	-0.668029	-0.683618
NG_034198.1	ADCY1	NA	NA	NA	NA	NA	NA	NA	NA	NA	NA	NA	NA
NG_034199.1	ABCA5	-0.863604	-0.850058	-1.43093	-1.43949	1.56026	1.62064	-0.227765	0.23947	1.52564	1.49387	1.62064	1.59152
NG_034200.1	ADNP	NA	NA	NA	NA	NA	NA	NA	NA	NA	NA	NA	NA
NG_034202.1	SCLT1	0.177556	0.182327	-0.720022	-0.734232	-0.119236	1.26002	-0.0828774	0.240414	-0.0502184	-0.0695045	1.26002	1.24437
NG_034203.1	TBC1D32	0.341699	0.350882	0.801282	0.780222	-0.339269	1.15656	0.701143	0.240906	0.391973	0.358767	1.15656	1.13175
NG_034205.1	IFT27	NA	NA	NA	NA	NA	NA	NA	NA	NA	NA	NA	NA
NG_034224.1	VARS2	-0.431139	-0.430125	-1.24753	-1.26792	-1.35035	1.21239	1.60705	0.242644	-0.329177	-0.347567	1.21239	1.20841
NG_034230.1	KCND2	-0.470128	-0.43522	-0.187323	-0.203186	-0.27519	-1.1692	-0.198001	0.244001	0.0779061	0.0413227	-1.1692	-1.16286
NG_034246.1	LIPE	1.02026	1.03355	-1.33218	-1.35405	-1.04508	0.447664	1.02474	0.246131	0.842045	0.822796	0.447664	0.429571
NG_034254.1	CCND2	0.176355	0.181681	0.972812	0.956486	-0.788599	0.995353	-1.06094	0.246327	1.06633	1.04354	0.995353	0.975012
NG_034260.1	COL27A1	NA	NA	NA	NA	NA	NA	NA	NA	NA	NA	NA	NA
NG_034265.1	SLC39A5	0.147164	0.159356	-0.339504	-0.361167	1.15376	1.03484	-1.23034	0.246655	-0.816134	-0.851319	1.03484	1.0211
NG_041778.1	BBIP1	-0.176401	-0.158811	1.2231	1.19616	0.440845	0.651716	0.443601	0.247392	-0.129365	-0.162186	0.651716	0.620091
NG_041781.2	KCNB1	1.14618	1.15929	0.670141	0.668817	0.995341	1.26051	0.370657	0.248803	1.12074	1.11475	1.26051	1.25693
NG_041782.1	TREX1	2.40025	2.38995	-0.974579	-0.979692	-0.719273	-0.762275	0.403692	0.250788	-0.155132	-0.170014	-0.762275	-0.772519
NG_041784.1	NADK2	-0.722148	-0.720029	-1.0129	-1.04371	-1.39648	0.0141144	1.05984	0.255191	-0.318304	-0.349374	0.0141144	-0.00881289
NG_041788.1	ANXA2P1	0.076955	0.0813254	-0.00684801	-0.0286737	-1.24354	1.05191	0.620496	0.255779	1.15041	1.12204	1.05191	1.02665
NG_041791.1	C2CD3	0.403412	0.407099	0.649835	0.625706	-0.986084	1.16144	-0.40742	0.256374	0.891897	0.857588	1.16144	1.12717
NG_041797.1	ZNF277	NA	NA	NA	NA	NA	NA	NA	NA	NA	NA	NA	NA
NG_041799.1	IARS2	-0.705738	-0.722856	-0.560512	-0.590967	-0.667503	1.29433	1.31661	0.257316	1.33332	1.32797	1.29433	1.29029
NG_041804.1	DNAL4	-0.186142	NA	-0.674341	NA	NA	-0.227152	NA	0.257405	-0.0556227	NA	-0.227152	NA
NG_041806.1	NDST1	0.868279	0.875974	-1.39588	-1.40556	-0.830527	1.07255	-0.0949257	0.260078	1.06087	1.04566	1.07255	1.05952
NG_041813.1	PURA	NA	NA	NA	NA	NA	NA	NA	NA	NA	NA	NA	NA
NG_041815.1	SPOP	-2.24717	-2.25877	0.838032	0.821962	-0.242799	0.846448	0.417742	0.261464	0.580563	0.552628	0.846448	0.824359
NG_041822.1	ASF1A	0.778014	0.787545	1.35698	1.33095	-0.72921	-0.769708	1.39679	0.262316	1.60035	1.56239	-0.769708	-0.784763
NG_041826.1	FAR1	0.654272	0.662368	-2.15698	-2.17714	-1.1418	0.0233617	0.723674	0.262982	1.28789	1.26373	0.0233617	0.000882628
NG_041827.1	KCNC1	0.174365	0.183916	-0.679993	-0.734007	0.485146	1.02754	-0.0669791	0.263722	1.91029	1.89425	1.02754	0.999322
NG_041829.1	STX1B	0.343139	0.347175	-2.26271	-2.27386	0.187973	0.41816	0.162503	0.263812	0.748485	0.730499	0.41816	0.402625
NG_041837.1	TGDS	NA	NA	NA	NA	NA	NA	NA	NA	NA	NA	NA	NA
NG_041938.1	KCNH7	1.20264	1.19321	-1.0222	-1.04049	1.85268	-1.54886	0.265181	0.265805	1.07355	1.02518	-1.54886	-1.5702
NG_041939.1	CCND3	1.60663	1.63013	-0.881531	-0.901232	-0.154787	1.43926	-1.09869	0.26958	0.591547	0.579461	1.43926	1.43804
NG_041943.1	GPATCH8	NA	NA	NA	NA	NA	NA	NA	NA	NA	NA	NA	NA
NG_042046.1	NARS2	NA	NA	NA	NA	NA	NA	NA	NA	NA	NA	NA	NA
NG_042051.1	KLHL41	0.60164	0.605741	-0.763996	-0.781068	0.814624	0.819238	0.777202	0.270253	0.595071	0.552954	0.819238	0.778891
NG_042054.1	FMN2	-0.426144	-0.409943	-0.793533	-0.818905	1.32889	-1.06833	1.40008	0.271326	-1.00782	-1.04522	-1.06833	-1.10098
NG_042060.1	CIC	0.745192	0.753383	-2.25168	-2.26431	-0.976748	0.399079	0.301068	0.271587	-0.28283	-0.298236	0.399079	0.387233
NG_042064.1	PTRH2	-0.170665	-0.157378	-0.46111	-0.476316	-1.52769	-0.154113	-0.0316371	0.273186	1.53478	1.51069	-0.154113	-0.174697
NG_042065.1	CALM2	NA	NA	NA	NA	NA	NA	NA	NA	NA	NA	NA	NA
NG_042093.1	KAT6A	-0.569009	-0.559203	0.327058	0.307955	-0.284451	1.85393	0.849874	0.27485	1.17971	1.15048	1.85393	1.82532
NG_042104.1	PODXL	1.32451	1.3291	-1.23073	-1.23839	-1.43394	0.470819	-0.503659	0.276106	-0.536941	-0.55385	0.470819	0.452222
NG_042125.1	CEP120	0.0185125	0.0246131	-0.183985	-0.209107	-1.19759	-0.66266	0.0705518	0.276173	1.3973	1.36261	-0.66266	-0.693753
NG_042142.1	ITPR2	1.40086	1.38961	-0.53875	-0.56276	-0.357727	0.042521	1.22343	0.276389	1.84316	1.80063	0.042521	0.0104346
NG_042166.1	ADCY6	NA	NA	NA	NA	NA	NA	NA	NA	NA	NA	NA	NA
NG_042168.1	TUBGCP4	NA	NA	NA	NA	NA	NA	NA	NA	NA	NA	NA	NA
NG_042176.1	HPCA	NA	NA	NA	NA	NA	NA	NA	NA	NA	NA	NA	NA
NG_042180.1	LRMDA	0.234923	0.249883	0.241079	0.230052	0.526848	-0.897069	-0.077085	0.2768	-1.93623	-1.88371	-0.897069	-0.875628
NG_042181.1	COL12A1	-0.839026	-0.823892	-1.4062	-1.42345	-2.2056	-0.171825	-0.908494	0.279459	-1.14334	-1.1694	-0.171825	-0.1958
NG_042185.1	KIF2A	1.07395	1.07532	-0.973783	-0.987149	-0.474388	-0.518075	-0.421693	0.279627	1.649	1.63317	-0.518075	-0.534759
NG_042187.1	RASA2	0.8276	0.834529	-0.0246512	-0.0502153	0.427986	1.27756	-0.810334	0.280468	1.5833	1.55075	1.27756	1.24858
NG_042194.1	GRIK4	1.50245	1.49189	-0.910072	-0.92739	1.35305	-0.625988	1.21617	0.28219	1.26356	1.22172	-0.625988	-0.650801
NG_042216.1	KIF5C	NA	NA	NA	NA	NA	NA	NA	NA	NA	NA	NA	NA
NG_042223.1	TUBB2A	0.766677	0.780943	0.308917	0.300728	-1.59329	0.836222	0.464324	0.285454	0.379881	0.366362	0.836222	0.828871
NG_042228.1	UQCRC2	NA	NA	NA	NA	NA	NA	NA	NA	NA	NA	NA	NA
NG_042234.1	PSME2	-1.50639	-1.50698	1.30732	1.30404	-1.46624	0.635846	0.963062	0.286219	-1.03454	-1.06277	0.635846	0.623026
NG_042268.1	RPN2	1.37063	1.39134	-1.39529	-1.41595	-1.1311	1.15678	1.51086	0.289237	1.58401	1.56785	1.15678	1.14201
NG_042271.1	CACNA1B	NA	NA	NA	NA	NA	NA	NA	NA	NA	NA	NA	NA
NG_042272.1	NT5C2	-1.33798	-1.3212	-1.65747	-1.66866	0.0675083	-0.297734	0.47383	0.289363	-1.1978	-1.22054	-0.297734	-0.321029
NG_042273.1	PHC1	NA	NA	NA	NA	NA	NA	NA	NA	NA	NA	NA	NA
NG_042277.1	VPS54	0.742707	0.740486	-1.28963	-1.31754	0.00348326	-1.14684	-1.11191	0.289723	-1.03531	-1.07302	-1.14684	-1.18069
NG_042279.2	NDUFA8	NA	NA	NA	NA	NA	NA	NA	NA	NA	NA	NA	NA
NG_042283.1	PPT2	0.65837	0.673815	0.304997	0.293823	1.14833	1.18276	0.804665	0.291661	-2.19451	-2.23817	1.18276	1.17614
NG_042284.1	SMAD1	0.975146	0.984973	-2.83434	-2.86634	1.0483	-0.282713	-0.978784	0.292651	1.45866	1.425	-0.282713	-0.315854
NG_042285.1	CHGB	NA	NA	NA	NA	NA	NA	NA	NA	NA	NA	NA	NA
NG_042286.1	SLC12A2	1.56184	1.57724	-0.700086	-0.724692	-0.585205	2.10046	-0.121428	0.293695	-0.0953028	-0.128356	2.10046	2.07676
NG_042289.1	SCN3A	NA	NA	NA	NA	NA	NA	NA	NA	NA	NA	NA	NA
NG_042292.1	KCNAB1	NA	NA	NA	NA	NA	NA	NA	NA	NA	NA	NA	NA
NG_042293.1	UTRN	-0.222998	-0.214337	-0.698365	-0.710935	1.03851	-0.300149	-1.28353	0.297045	0.749254	0.717912	-0.300149	-0.32049
NG_042305.1	MYH10	1.0059	1.01781	-1.06356	-1.08645	-0.85718	1.24529	1.56329	0.297666	-0.157099	-0.176822	1.24529	1.24201
NG_042309.1	KCNA4	NA	NA	NA	NA	NA	NA	NA	NA	NA	NA	NA	NA
NG_042789.1	SLMAP	0.600746	0.602918	-1.41254	-1.42639	0.529561	1.232	0.938481	0.299398	1.24742	1.21413	1.232	1.20185
NG_042800.1	GNAO1	NA	NA	NA	NA	NA	NA	NA	NA	NA	NA	NA	NA
NG_042806.1	STT3A	0.802093	0.824419	-0.958167	-0.989898	1.67793	1.20469	0.86148	0.301014	0.263877	0.231464	1.20469	1.18628
NG_042807.1	NR2E1	NA	NA	NA	NA	NA	NA	NA	NA	NA	NA	NA	NA
NG_042810.1	MPDZ	0.656129	0.68141	-2.06821	-2.10451	0.314945	0.939227	0.641511	0.301428	1.10826	1.10204	0.939227	0.934077
NG_042815.1	CFAP53	-1.38066	-1.37008	0.537694	0.502111	-0.577922	0.355248	0.150165	0.301664	-2.84877	-2.88514	0.355248	0.311143
NG_042818.1	CLMP	-0.455822	-0.433617	-1.2873	-1.28891	-0.303214	0.0973434	0.52972	0.302806	1.20314	1.14641	0.0973434	0.0644929
NG_042821.1	NTNG1	0.428188	0.437483	1.19712	1.16859	0.80152	1.36637	-1.36978	0.302849	-0.58143	-0.614048	1.36637	1.33061
NG_042822.1	TRIT1	-1.6243	-1.6067	0.919567	0.890663	-1.96815	0.457492	0.644755	0.303755	1.24448	1.20332	0.457492	0.425931
NG_042828.1	ZMYND10	-1.00505	-1.00434	-0.467408	-0.48735	-0.489252	1.78427	-1.12933	0.304393	1.4855	1.47764	1.78427	1.78334
NG_042829.1	EOGT	NA	NA	NA	NA	NA	NA	NA	NA	NA	NA	NA	NA
NG_042830.1	ACKR4	1.22863	1.24331	-1.34064	-1.37388	0.316018	0.823775	1.45718	0.304637	1.23707	1.22329	0.823775	0.808688
NG_042832.1	DDHD1	-0.574668	-0.564747	-1.10614	-1.12575	-0.0904093	0.630339	1.41684	0.304775	1.72281	1.68877	0.630339	0.601947
NG_042838.1	EPG5	-1.0059	-0.971564	-0.359557	-0.361603	-0.064784	0.051123	0.104655	0.305404	2.35103	2.30408	0.051123	0.0378235
NG_042850.1	TBC1D4	1.28432	1.30965	0.521598	0.506527	1.10984	1.73874	0.605084	0.305494	-0.505942	-0.537773	1.73874	1.72698
NG_042851.1	TECPR2	NA	NA	NA	NA	NA	NA	NA	NA	NA	NA	NA	NA
NG_042855.1	ATP8A2	NA	NA	NA	NA	NA	NA	NA	NA	NA	NA	NA	NA
NG_042859.1	TENM3	-0.386777	-0.383315	-1.38618	-1.40911	-0.279491	-1.12342	0.154727	0.308979	0.0952841	0.063019	-1.12342	-1.15152
NG_042863.1	FMN1	NA	NA	NA	NA	NA	NA	NA	NA	NA	NA	NA	NA
NG_042874.1	PARD6A	NA	NA	NA	NA	NA	NA	NA	NA	NA	NA	NA	NA
NG_044984.2	PPIE	-0.0238844	-0.00913972	-1.60519	-1.61934	1.00748	0.547203	0.837226	0.309801	-0.227124	-0.249012	0.547203	0.529362
NG_044999.1	INPP5F	NA	NA	NA	NA	NA	NA	NA	NA	NA	NA	NA	NA
NG_045000.3	MEG8	NA	NA	NA	NA	NA	NA	NA	NA	NA	NA	NA	NA
NG_045002.3	GET1	NA	NA	NA	NA	NA	NA	NA	NA	NA	NA	NA	NA
NG_045219.1	ZDBF2	-0.290495	-0.279529	-1.06335	-1.07924	-0.354401	1.91019	-0.306092	0.310101	1.46863	1.43612	1.91019	1.87983
NG_046155.1	WDR27	-0.577008	-0.571401	0.757878	0.737799	0.751324	1.03169	0.305297	0.310724	1.21107	1.18378	1.03169	1.00723
NG_046164.1	PARL	-0.762735	-0.758081	-0.697374	-0.713025	-1.1197	-0.561679	0.827116	0.31643	1.39685	1.38405	-0.561679	-0.580677
NG_046331.1	JPH1	-1.41356	-1.42824	0.474939	0.454068	0.364405	0.477488	-0.809532	0.319566	1.04428	1.02007	0.477488	0.452467
NG_046341.1	SLC12A5	-0.185059	-0.176334	-2.10868	-2.131	0.521747	0.609931	0.577238	0.319569	0.833755	0.820217	0.609931	0.597848
NG_046342.1	RSPRY1	1.46634	1.46989	0.937556	0.922792	-1.33717	-0.162433	1.76563	0.322437	1.06433	1.04259	-0.162433	-0.176838
NG_046601.1	POGZ	NA	NA	NA	NA	NA	NA	NA	NA	NA	NA	NA	NA
NG_046603.1	WAC	-1.11357	-1.11362	-1.82046	-1.84729	-0.435234	1.0315	1.08151	0.323223	0.897978	0.872826	1.0315	1.00963
NG_046695.1	TRAIP	NA	NA	NA	NA	NA	NA	NA	NA	NA	NA	NA	NA
NG_046725.1	PRDM8	0.813484	0.81561	-1.97171	-1.9915	0.630222	-0.839684	0.0933083	0.324306	-0.353125	-0.381348	-0.839684	-0.864617
NG_046730.1	SIPA1L3	1.49678	1.50324	-1.43431	-1.46572	0.502541	-1.01875	0.832488	0.324805	1.39508	1.3759	-1.01875	-1.05148
NG_046731.1	KATNIP	NA	NA	NA	NA	NA	NA	NA	NA	NA	NA	NA	NA
NG_046742.1	NONO	0.303255	0.317973	0.0525718	0.041208	0.488951	0.64584	0.43621	0.324945	0.998259	0.985276	0.64584	0.633621
NG_046752.1	MORC2	0.264491	0.276655	1.16539	1.15726	-0.169235	1.40684	-1.35007	0.325134	-0.410181	-0.436716	1.40684	1.39567
NG_046771.1	COA3	-1.87923	-1.87215	-0.854904	-0.864756	0.756213	0.697106	0.660577	0.325175	0.92577	0.912764	0.697106	0.686078
NG_046780.1	PGAP1	-0.236955	-0.226478	-2.60782	-2.61951	0.116135	-0.519105	0.719579	0.325963	-1.23066	-1.25506	-0.519105	-0.541649
NG_046782.1	HACE1	1.34989	NA	-1.74323	NA	NA	0.457742	NA	0.32602	0.223673	NA	0.457742	NA
NG_046847.1	USP7	NA	NA	NA	NA	NA	NA	NA	NA	NA	NA	NA	NA
NG_046848.1	TRIP4	-0.602595	-0.589675	1.1329	1.10949	1.02679	-0.462686	1.38306	0.326127	-0.656649	-0.687	-0.462686	-0.489395
NG_046850.1	PER3	NA	NA	NA	NA	NA	NA	NA	NA	NA	NA	NA	NA
NG_046859.1	OVOL2	NA	NA	NA	NA	NA	NA	NA	NA	NA	NA	NA	NA
NG_046860.1	DVL3	NA	NA	NA	NA	NA	NA	NA	NA	NA	NA	NA	NA
NG_046885.1	AASDH	NA	NA	NA	NA	NA	NA	NA	NA	NA	NA	NA	NA
NG_046902.1	TSPAN5	NA	NA	NA	NA	NA	NA	NA	NA	NA	NA	NA	NA
NG_046904.1	TBR1	NA	NA	NA	NA	NA	NA	NA	NA	NA	NA	NA	NA
NG_046905.1	NDST2	0.182533	0.193572	-3.4146	-3.46327	0.200907	0.739837	0.597661	0.326782	0.590145	0.564737	0.739837	0.719569
NG_046908.1	YY1	0.509786	0.526079	-1.65374	-1.68046	0.164821	0.90042	0.287309	0.327243	1.44764	1.42996	0.90042	0.883363
NG_046913.1	ADCY2	-0.528591	-0.524914	-1.60961	-1.6408	-0.277237	1.42395	1.36156	0.328443	-0.732458	-0.764253	1.42395	1.41372
NG_046914.1	DAB1	0.662414	0.660483	-0.141399	-0.16765	-0.573897	-0.928439	-0.944781	0.32963	1.06411	1.02624	-0.928439	-0.959455
NG_046915.1	PPP1R13B	NA	NA	NA	NA	NA	NA	NA	NA	NA	NA	NA	NA
NG_046917.1	WDFY3	NA	NA	NA	NA	NA	NA	NA	NA	NA	NA	NA	NA
NG_046919.1	NLGN1	-0.293574	-0.281116	0.195079	0.151106	1.08401	-0.20133	1.313	0.332223	1.32481	1.2549	-0.20133	-0.25235
NG_046922.1	MAML1	-0.836807	-0.826716	-1.8952	-1.91135	-0.778619	1.529	1.02985	0.333848	0.815112	0.793099	1.529	1.51047
NG_046923.1	ZHX3	NA	NA	NA	NA	NA	NA	NA	NA	NA	NA	NA	NA
NG_046926.1	RORB	NA	NA	NA	NA	NA	NA	NA	NA	NA	NA	NA	NA
NG_046930.1	UVRAG	0.605643	0.614227	1.01325	0.987459	0.0671487	-0.180619	0.931621	0.333849	-0.205217	-0.231093	-0.180619	-0.202849
NG_046934.1	HAUS3	NA	NA	NA	NA	NA	NA	NA	NA	NA	NA	NA	NA
NG_046937.1	SF3B3	NA	NA	NA	NA	NA	NA	NA	NA	NA	NA	NA	NA
NG_046942.1	ST3GAL2	NA	NA	NA	NA	NA	NA	NA	NA	NA	NA	NA	NA
NG_046944.1	HLF	-0.847996	-0.84183	-0.947733	-0.96688	-1.30005	1.38987	-0.354244	0.335683	1.66168	1.6547	1.38987	1.38335
NG_046946.1	AKAP8	0.627784	0.635557	0.206484	0.189209	-0.708096	0.094164	1.12437	0.335855	0.474241	0.446967	0.094164	0.0718062
NG_046947.1	KATNB1	0.985479	0.988637	-0.998726	-1.01448	0.782864	-0.435555	1.22079	0.337754	1.10949	1.09525	-0.435555	-0.452953
NG_046948.1	MED13	0.837474	0.836648	-1.90472	-1.9157	-0.340921	-0.841631	0.0878864	0.337755	-0.291462	-0.313278	-0.841631	-0.859346
NG_046950.1	ZNF804A	0.547262	0.556926	0.0564718	0.0341826	-0.23379	-0.00892476	-0.213303	0.340632	0.729101	0.688427	-0.00892476	-0.0384177
NG_046951.1	ZHX2	-0.36769	-0.345954	0.631012	0.610944	0.123446	-0.664218	1.30859	0.348485	-1.34856	-1.34851	-0.664218	-0.670676
NG_046958.1	HERC1	0.454878	0.461265	0.00696439	-0.0119272	0.255327	-1.50771	0.638876	0.348843	0.937447	0.904578	-1.50771	-1.52332
NG_046966.1	ARAP3	NA	NA	NA	NA	NA	NA	NA	NA	NA	NA	NA	NA
NG_046969.1	IGHEP2	1.1237	1.13155	0.575263	0.557655	0.654625	-0.0806405	-0.687234	0.349753	-0.162261	-0.187086	-0.0806405	-0.10216
NG_046971.1	TRHDE	-1.77245	-1.77058	-1.87137	-1.90078	-0.319513	0.599297	1.50041	0.35026	1.30548	1.26509	0.599297	0.563344
NG_046972.1	SLC25A16	NA	NA	NA	NA	NA	NA	NA	NA	NA	NA	NA	NA
NG_046979.1	FAT2	NA	NA	NA	NA	NA	NA	NA	NA	NA	NA	NA	NA
NG_046983.1	CREB3	1.29329	1.27165	-0.990509	-0.958084	-0.682075	-1.25141	0.909287	0.350576	-0.489364	-0.476337	-1.25141	-1.21469
NG_046985.1	KLHL20	NA	NA	NA	NA	NA	NA	NA	NA	NA	NA	NA	NA
NG_046987.1	DDX10	NA	NA	NA	NA	NA	NA	NA	NA	NA	NA	NA	NA
NG_046988.1	E2F1	NA	NA	NA	NA	NA	NA	NA	NA	NA	NA	NA	NA
NG_046989.1	MMP14	-0.262297	-0.252901	-1.37264	-1.40148	-0.553822	-0.343592	1.36202	0.35081	-0.951572	-0.989063	-0.343592	-0.375501
NG_046993.1	KDM5A	1.1354	1.13711	-2.14115	-2.15781	1.34369	-1.44102	0.428721	0.351468	1.60671	1.582	-1.44102	-1.46255
NG_046994.1	FAT1	0.735932	0.750708	0.540189	0.528592	-2.18024	1.06345	0.963715	0.352782	0.963791	0.946416	1.06345	1.04927
NG_047000.1	PTGER4	0.244991	0.251573	1.23302	1.21935	-1.10649	-0.576797	0.604186	0.353705	0.996682	0.976032	-0.576797	-0.596727
NG_047001.1	PHF2	NA	NA	NA	NA	NA	NA	NA	NA	NA	NA	NA	NA
NG_047002.1	RNF20	0.509881	0.509071	-0.667931	-0.670322	-0.468205	1.87115	0.079225	0.35428	-0.0864977	-0.104671	1.87115	1.82497
NG_047003.1	APPL1	-0.0722872	-0.0631918	0.674551	0.648777	-0.151628	0.697269	0.612414	0.357448	0.980268	0.942884	0.697269	0.665856
NG_047004.1	HIVEP2	NA	NA	NA	NA	NA	NA	NA	NA	NA	NA	NA	NA
NG_047012.1	ATP6V1A	-0.782263	-0.77377	-1.32186	-1.33274	0.888355	1.16181	-0.522206	0.360306	1.28922	1.272	1.16181	1.14692
NG_047013.1	ATP6V1B2	NA	NA	NA	NA	NA	NA	NA	NA	NA	NA	NA	NA
NG_047014.1	ARHGAP35	-0.307909	-0.299745	-1.96929	-1.98445	-0.091118	2.44911	-0.0777048	0.361005	0.335603	0.315734	2.44911	2.43393
NG_047017.1	BDP1	NA	NA	NA	NA	NA	NA	NA	NA	NA	NA	NA	NA
NG_047018.1	HDAC1	-0.935717	-0.932696	-1.05723	-1.07228	2.2876	0.584288	-0.481514	0.362062	-0.331145	-0.350776	0.584288	0.569961
NG_047022.1	PREX2	2.17198	2.16178	-1.34692	-1.36931	-0.691819	0.524006	0.59687	0.362618	0.904299	0.876056	0.524006	0.498343
NG_047026.1	EIF4G3	1.24712	1.23698	-0.0966165	-0.105938	-0.592498	-0.981558	1.46932	0.362841	-0.248182	-0.261722	-0.981558	-0.981132
NG_047029.1	CTNNA1	0.186031	0.19351	-1.33295	-1.34247	0.337951	-1.20718	0.947827	0.370072	-1.10719	-1.12623	-1.20718	-1.2224
NG_047030.1	ABCF1	1.59427	1.60452	-0.525156	-0.532302	0.231313	1.63843	0.00815924	0.37017	0.0248181	0.0145227	1.63843	1.63653
NG_047035.1	RERE	0.718357	0.717495	-1.16515	-1.16782	0.223776	-1.30989	1.00341	0.371138	0.732067	0.706087	-1.30989	-1.31471
NG_047036.1	ATP1A1	0.398871	0.405692	-0.920291	-0.932455	-1.41813	0.861953	0.58876	0.371611	1.36419	1.3415	0.861953	0.842733
NG_047037.1	ATP6V0A1	-1.15596	-1.11249	-1.04511	-1.0818	-0.300862	-0.453188	0.601958	0.375545	0.600139	0.523738	-0.453188	-0.510394
NG_047038.1	MYRF	1.00151	0.985664	-0.962889	-0.979546	0.814476	-0.912128	-0.922827	0.376293	0.849496	0.822855	-0.912128	-0.932051
NG_047040.1	CAMK2A	0.221965	0.22718	-3.05835	-3.06432	0.0100395	-0.133816	-0.932443	0.378655	0.0910957	0.0642477	-0.133816	-0.156474
NG_047042.1	CDC42	0.0337665	0.0479272	0.325489	0.30105	-3.88372	0.303574	0.673368	0.378909	0.828634	0.788813	0.303574	0.272384
NG_047043.1	CLTC	0.453853	0.461692	0.156264	0.12824	-1.82931	0.840815	0.697402	0.383439	0.973261	0.940938	0.840815	0.810695
NG_047044.1	CNTFR	NA	NA	NA	NA	NA	NA	NA	NA	NA	NA	NA	NA
NG_047045.1	ATF2	-0.734494	-0.721306	-2.7231	-2.71713	0.503955	-0.777414	0.891362	0.384048	-0.28621	-0.314838	-0.777414	-0.797296
NG_047047.1	DNAH9	0.136511	NA	-0.902241	NA	NA	1.63679	NA	0.384509	1.21283	NA	1.63679	NA
NG_047048.2	EIF4E	NA	NA	NA	NA	NA	NA	NA	NA	NA	NA	NA	NA
NG_047049.1	FABP3	NA	NA	NA	NA	NA	NA	NA	NA	NA	NA	NA	NA
NG_047050.1	GABRB2	1.08403	1.079	0.724584	0.699794	0.483352	-1.89832	0.0331207	0.389195	0.367928	0.341389	-1.89832	-1.88181
NG_047053.1	GOLGA4	NA	NA	NA	NA	NA	NA	NA	NA	NA	NA	NA	NA
NG_047058.1	MBNL1	NA	NA	NA	NA	NA	NA	NA	NA	NA	NA	NA	NA
NG_047060.1	METTL1	-0.0179729	-0.00492434	1.39075	1.37067	-0.995822	-0.0688571	0.458924	0.393927	0.567308	0.543713	-0.0688571	-0.0859287
NG_047064.1	NELL1	1.54701	1.545	0.319707	0.289779	-0.930641	0.138038	0.479734	0.39419	-1.3036	-1.33243	0.138038	0.10229
NG_047069.1	PPP2R5C	NA	NA	NA	NA	NA	NA	NA	NA	NA	NA	NA	NA
NG_047072.1	PTPRF	-1.20159	-1.21079	-2.04339	-2.08064	-1.32112	1.75281	0.855549	0.39526	0.921514	0.908113	1.75281	1.75155
NG_047074.1	RFX4	NA	NA	NA	NA	NA	NA	NA	NA	NA	NA	NA	NA
NG_047076.1	RYR3	NA	NA	NA	NA	NA	NA	NA	NA	NA	NA	NA	NA
NG_047078.1	GRIA1	0.844251	0.864507	0.254412	0.238994	-1.10193	0.196749	0.591479	0.396253	-0.873858	-0.901548	0.196749	0.175717
NG_047080.1	SLC8A3	0.652185	0.658972	0.982488	0.949894	-0.777472	0.759023	-1.37286	0.396652	-0.6423	-0.669946	0.759023	0.721876
NG_047081.1	SMARCC2	0.665167	0.66785	0.0655292	0.0501657	0.57289	0.625629	0.528181	0.396739	0.596028	0.568368	0.625629	0.600814
NG_047082.1	STX3	NA	NA	NA	NA	NA	NA	NA	NA	NA	NA	NA	NA
NG_047083.1	MTX1	-0.959659	-0.962871	-2.48337	-2.53215	0.0252306	0.0206703	0.465945	0.39962	0.200665	0.173794	0.0206703	-0.00507265
NG_047084.1	THBS4	0.340557	0.342604	-0.76582	-0.773038	0.696623	1.58648	-0.0751928	0.404966	0.0180817	-0.00154734	1.58648	1.55649
NG_047087.1	ZFP37	NA	NA	NA	NA	NA	NA	NA	NA	NA	NA	NA	NA
NG_047088.1	ST7	-0.334999	-0.32026	-0.696877	-0.714954	-0.629091	0.309707	-0.441814	0.405078	-0.618917	-0.648195	0.309707	0.283325
NG_047091.1	KCNAB2	NA	NA	NA	NA	NA	NA	NA	NA	NA	NA	NA	NA
NG_047092.1	DGKZ	NA	NA	NA	NA	NA	NA	NA	NA	NA	NA	NA	NA
NG_047093.1	CADPS	NA	NA	NA	NA	NA	NA	NA	NA	NA	NA	NA	NA
NG_047095.1	URI1	1.85917	1.87165	-1.25063	-1.27171	1.55169	-0.0333062	-0.0940098	0.410492	1.64827	1.63703	-0.0333062	-0.0519249
NG_047101.1	USP8	NA	NA	NA	NA	NA	NA	NA	NA	NA	NA	NA	NA
NG_047105.1	SLIT2	NA	NA	NA	NA	NA	NA	NA	NA	NA	NA	NA	NA
NG_047107.1	NRXN2	1.02614	1.03858	-1.27188	-1.28825	-0.62987	0.0433337	0.995855	0.411568	0.761024	0.720449	0.0433337	0.0117973
NG_047109.1	RASAL2	-2.03963	-2.0221	-2.49991	-2.5144	0.0312931	1.01006	0.348543	0.411965	0.352185	0.303244	1.01006	0.962378
NG_047110.1	STX8	1.59022	1.58342	0.978215	0.949282	0.410061	-0.941985	-0.888676	0.413553	0.806503	0.77018	-0.941985	-0.969285
NG_047111.1	NCOR1	-0.139426	-0.138276	0.573936	0.532493	0.462869	0.31503	-1.93452	0.416192	-0.215077	-0.254312	0.31503	0.271722
NG_047112.1	MTFR1	0.856014	0.883769	1.02834	1.00617	0.837418	0.723206	0.967518	0.416213	-0.953804	-0.993252	0.723206	0.692571
NG_047113.1	ULK2	-0.39596	-0.389981	-1.29836	-1.31097	-0.0834479	2.10163	-0.207952	0.416434	-0.299789	-0.322889	2.10163	2.07415
NG_047114.1	SCRN1	NA	NA	NA	NA	NA	NA	NA	NA	NA	NA	NA	NA
NG_047115.1	ABCC5	0.513752	0.511871	0.269187	0.228706	-0.197279	-0.461573	1.01405	0.416959	1.07974	1.03871	-0.461573	-0.518706
NG_047120.1	DCTN2	-1.59877	-1.60101	0.187798	0.17445	0.738483	0.800119	0.926091	0.417583	0.59587	0.577994	0.800119	0.78781
NG_047121.1	CCT7	NA	NA	NA	NA	NA	NA	NA	NA	NA	NA	NA	NA
NG_047123.1	MAPRE2	0.580068	0.586235	-1.20505	-1.20749	0.685859	-0.746174	-0.284899	0.42224	1.73305	1.70275	-0.746174	-0.756054
NG_047127.1	DAAM1	NA	NA	NA	NA	NA	NA	NA	NA	NA	NA	NA	NA
NG_047128.1	PDZRN3	NA	NA	NA	NA	NA	NA	NA	NA	NA	NA	NA	NA
NG_047132.1	PPRC1	0.839656	0.859599	-1.91559	-1.93341	-1.19567	0.871559	0.770917	0.423457	1.14933	1.13286	0.871559	0.85735
NG_047133.1	RHOBTB2	NA	NA	NA	NA	NA	NA	NA	NA	NA	NA	NA	NA
NG_047134.1	ANKRD12	0.327902	0.340987	0.686088	0.668191	0.878651	0.165851	0.267671	0.423709	0.836073	0.808381	0.165851	0.138315
NG_047136.1	CABIN1	NA	NA	NA	NA	NA	NA	NA	NA	NA	NA	NA	NA
NG_047137.1	SMUG1	NA	NA	NA	NA	NA	NA	NA	NA	NA	NA	NA	NA
NG_047141.1	SPAG8	NA	NA	NA	NA	NA	NA	NA	NA	NA	NA	NA	NA
NG_047143.1	FBXL5	NA	NA	NA	NA	NA	NA	NA	NA	NA	NA	NA	NA
NG_047144.1	CNTN6	0.624227	0.629722	-2.26373	-2.28187	-0.227829	1.594	-0.0311249	0.426599	-0.69505	-0.720547	1.594	1.57394
NG_047145.1	PCLO	0.864158	0.867499	0.893652	0.872747	0.798791	-1.61367	-0.341249	0.427197	0.518923	0.49328	-1.61367	-1.61978
NG_047151.1	ING4	1.49843	1.50723	0.792473	0.771095	-0.0300417	-0.402164	-0.849318	0.42769	1.16894	1.13587	-0.402164	-0.421316
NG_047152.1	UBR5	0.769951	0.779913	-2.00255	-2.02118	0.769648	-0.392743	0.896074	0.428356	1.2097	1.19772	-0.392743	-0.408722
NG_047156.1	CNTN5	-0.172534	-0.17607	1.49426	1.48288	0.464703	-1.49995	0.838996	0.428567	1.46969	1.44677	-1.49995	-1.56864
NG_047160.1	ZSCAN2	NA	NA	NA	NA	NA	NA	NA	NA	NA	NA	NA	NA
NG_047161.1	LARP1B	1.75001	1.74143	-0.786828	-0.796006	0.180473	-0.256533	1.17016	0.429259	-0.215239	-0.237175	-0.256533	-0.274746
NG_047162.1	BMP2K	NA	NA	NA	NA	NA	NA	NA	NA	NA	NA	NA	NA
NG_047163.1	INTS8	NA	NA	NA	NA	NA	NA	NA	NA	NA	NA	NA	NA
NG_047164.1	FRMD4A	1.02692	1.04962	-1.09888	-1.12434	-0.896951	0.8024	0.201892	0.431971	1.12997	1.09415	0.8024	0.771299
NG_047166.1	EXOC2	NA	NA	NA	NA	NA	NA	NA	NA	NA	NA	NA	NA
NG_047167.1	KDM3A	NA	NA	NA	NA	NA	NA	NA	NA	NA	NA	NA	NA
NG_047168.1	THSD1	-1.02572	-1.02602	1.07099	1.05032	1.35475	-1.17581	-0.452824	0.434247	0.112267	0.0802505	-1.17581	-1.20956
NG_047170.1	KCNQ5	1.76247	1.74786	-0.919699	-0.944863	-0.631312	-0.553861	-0.194034	0.435327	-0.0264267	-0.0683943	-0.553861	-0.588147
NG_047171.1	SNX14	NA	NA	NA	NA	NA	NA	NA	NA	NA	NA	NA	NA
NG_047173.1	HMGN1P2	-1.06507	-1.05481	-0.902298	-0.926397	-0.409369	1.4197	1.53136	0.436194	-0.0631643	-0.102394	1.4197	1.38327
NG_047174.1	RBAK	NA	NA	NA	NA	NA	NA	NA	NA	NA	NA	NA	NA
NG_047176.1	COX5BP3	-0.304292	-0.285321	-1.49472	-1.49665	0.768829	-1.08033	0.409735	0.436814	2.08352	2.04004	-1.08033	-1.09172
NG_047178.1	ABCG4	-0.70541	-0.693327	-0.935247	-0.954448	-1.16369	0.95587	1.55489	0.437057	-0.683967	-0.710838	0.95587	0.934663
NG_047179.1	CSRNP1	-1.73374	-1.73866	-0.341388	-0.362538	-0.893374	1.7803	-0.556098	0.437917	1.15146	1.13942	1.7803	1.77949
NG_047182.1	SLC13A3	NA	NA	NA	NA	NA	NA	NA	NA	NA	NA	NA	NA
NG_047184.1	BRCC3	NA	NA	NA	NA	NA	NA	NA	NA	NA	NA	NA	NA
NG_047195.1	TBL1XR1	NA	NA	NA	NA	NA	NA	NA	NA	NA	NA	NA	NA
NG_047197.1	TRPM3	1.21429	1.22951	1.43512	1.40132	-0.219065	1.00907	-0.042054	0.441456	-2.13777	-2.18578	1.00907	0.966667
NG_047198.1	WDR26	-0.864097	-0.858279	-0.799866	-0.819604	-1.32109	1.87942	1.92223	0.441737	-0.277968	-0.303114	1.87942	1.86968
NG_047201.1	NETO2	0.0268412	0.0405602	-2.12792	-2.16833	-1.09895	1.09651	-0.712548	0.443549	1.34631	1.31384	1.09651	1.06766
NG_047203.1	USP48	-0.584073	-0.577725	-1.74896	-1.76681	0.77242	0.971566	0.529605	0.444179	1.26753	1.24717	0.971566	0.953509
NG_047204.1	COL25A1	1.10639	1.11398	0.51171	0.504623	-0.153725	-0.0536954	1.17453	0.444534	-0.825343	-0.840915	-0.0536954	-0.0651776
NG_047205.1	RTN4IP1	-0.205187	-0.197694	-1.16763	-1.17671	-0.588168	0.173841	-0.350292	0.444559	1.82164	1.77687	0.173841	0.147466
NG_050571.1	ZNF582	NA	NA	NA	NA	NA	NA	NA	NA	NA	NA	NA	NA
NG_050601.1	ZC3H14	-1.17512	-1.16534	-1.9594	-1.97902	-1.05173	-1.1273	0.442845	0.444767	1.27928	1.25837	-1.1273	-1.14987
NG_050616.1	CACNA1E	NA	NA	NA	NA	NA	NA	NA	NA	NA	NA	NA	NA
NG_050622.1	RAPGEF1	0.0440519	0.049732	-1.02608	-1.03878	1.1671	1.66635	1.49286	0.445591	1.6276	1.60698	1.66635	1.64819
NG_050628.1	NFKB1	NA	NA	NA	NA	NA	NA	NA	NA	NA	NA	NA	NA
NG_050640.1	SEC14L1	1.11019	1.12674	-1.91247	-1.95211	0.494821	1.08331	0.900435	0.447214	1.12426	1.11858	1.08331	1.07966
NG_050642.1	FZD5	0.156136	0.158622	-1.09487	-1.11392	2.22767	0.013451	0.583969	0.447285	1.5742	1.55067	0.013451	-0.00879716
NG_050644.1	B3GALT1	-0.46372	-0.450386	-0.325858	-0.344292	-0.069973	0.132086	-0.0601201	0.448554	-0.287846	-0.316829	0.132086	0.0998388
NG_050648.1	PLXNC1	0.0736888	0.0852664	0.785722	0.767975	0.386465	-1.9322	1.11983	0.448872	0.191593	0.160408	-1.9322	-1.97056
NG_050650.1	SPRY2	0.52135	0.535294	0.516991	0.501763	0.681767	0.782483	0.756972	0.450422	-0.859457	-0.891445	0.782483	0.762425
NG_050652.1	NET1	NA	NA	NA	NA	NA	NA	NA	NA	NA	NA	NA	NA
NG_050658.1	WARS2	-0.21517	-0.165346	-0.424005	-0.395444	-0.000226356	-1.01974	-0.300286	0.454964	0.987328	0.936905	-1.01974	-0.968179
NG_050660.1	ARPP21	0.304767	0.326444	-3.09677	-3.14003	0.184914	0.616863	0.387766	0.454971	0.607883	0.553275	0.616863	0.569548
NG_050663.1	SPEN	-1.06524	-1.05775	0.570953	0.561021	0.281085	0.902614	-1.37486	0.45512	0.545016	0.528976	0.902614	0.889753
NG_050664.1	SIRT1	NA	NA	NA	NA	NA	NA	NA	NA	NA	NA	NA	NA
NG_050665.1	LIPT1	-0.631996	-0.62124	-1.92702	-1.96216	0.55097	1.36323	0.567193	0.460369	0.419596	0.384623	1.36323	1.33763
NG_050675.1	PCDHA9	-0.376874	-0.355676	0.185078	0.144787	0.289998	1.12922	-0.687261	0.460423	-1.15147	-1.20746	1.12922	1.07378
NG_050678.1	ZMAT3	NA	NA	NA	NA	NA	NA	NA	NA	NA	NA	NA	NA
NG_050682.1	INTS3	-0.931141	-0.920905	-1.14231	-1.15344	-0.790381	1.24426	1.11489	0.464468	1.13997	1.12262	1.24426	1.22936
NG_050685.1	CTTNBP2	0.77699	0.786514	0.521938	0.504444	-0.945074	1.02272	0.941632	0.467426	1.25292	1.22802	1.02272	1.00074
NG_050686.1	CHD6	NA	NA	NA	NA	NA	NA	NA	NA	NA	NA	NA	NA
NG_050735.1	SAFB2	0.487031	0.498997	-0.0992834	-0.118175	0.248399	0.3385	0.676088	0.467529	0.504941	0.468416	0.3385	0.308229
NG_050737.1	SP4	0.232201	0.23895	-2.16864	-2.1626	-0.0210633	-1.30494	-0.190937	0.46937	-0.60428	-0.630746	-1.30494	-1.31742
NG_050740.1	STX7	0.75601	0.765782	1.25492	1.23853	0.695571	0.920228	0.485492	0.471292	-2.03564	-2.05373	0.920228	0.900258
NG_050746.1	PCDHGC5	-1.59277	-1.57183	0.469105	0.449705	-1.22533	-0.522346	-1.14377	0.471467	2.27689	2.24111	-0.522346	-0.544434
NG_050751.1	SOX11	1.05735	1.07083	-0.388397	-0.452149	-0.138456	-1.30682	1.8831	0.472249	0.0356225	-0.0360559	-1.30682	-1.4033
NG_050761.1	PCDHB4	0.633349	0.65771	-0.521866	-0.549707	-0.96238	0.886777	0.961184	0.472996	-0.260716	-0.297551	0.886777	0.86676
NG_050764.1	NANOS1	-0.883022	-0.880495	-0.903253	-0.917835	-1.18831	-1.2902	1.1468	0.474002	1.71982	1.68138	-1.2902	-1.30583
NG_050860.1	ARHGEF10L	NA	NA	NA	NA	NA	NA	NA	NA	NA	NA	NA	NA
NG_050912.1	PCNX2	-0.140067	-0.132313	-1.14811	-1.16616	1.86315	0.980654	1.2912	0.475442	1.03542	1.016	0.980654	0.963998
NG_050926.1	MACF1	NA	NA	NA	NA	NA	NA	NA	NA	NA	NA	NA	NA
NG_050927.1	COPA	NA	NA	NA	NA	NA	NA	NA	NA	NA	NA	NA	NA
NG_050928.1	GPR39	-0.00738855	0.000867427	-2.98813	-2.97901	1.4833	-0.862716	-0.0634137	0.476533	0.17168	0.156166	-0.862716	-0.869888
NG_050930.1	SLC9A2	0.656042	0.674326	-1.27074	-1.30151	0.853229	1.64801	-0.173026	0.476828	0.033541	0.0101782	1.64801	1.64805
NG_050931.1	TNR	NA	NA	NA	0.0268857	NA	NA	NA	NA	NA	1.44167	NA	0.731897
NG_050949.1	PIK3R3	NA	NA	NA	NA	NA	NA	NA	NA	NA	NA	NA	NA
NG_050957.1	DNAH6	-0.929737	-0.919634	0.487034	0.476827	-1.64664	0.293283	1.32591	0.478908	0.801864	0.783345	0.293283	0.27844
NG_050964.1	XPR1	-0.0134999	0.00610547	0.680974	0.642687	-0.00448099	0.490445	0.411262	0.479002	-2.87238	-2.90801	0.490445	0.443247
NG_050965.1	ARHGAP29	NA	NA	NA	NA	NA	NA	NA	NA	NA	NA	NA	NA
NG_050966.1	SV2A	-1.50392	-1.5016	0.349786	0.340572	-1.84361	0.5774	0.77168	0.479517	0.559305	0.545374	0.5774	0.56552
NG_050967.1	EXOC6B	NA	NA	NA	NA	NA	NA	NA	NA	NA	NA	NA	NA
NG_050988.1	GATAD2B	-0.211145	-0.184707	-0.818851	-0.83693	0.326145	-0.306864	0.723651	0.484517	0.0947501	0.0398494	-0.306864	-0.346389
NG_051001.1	OLA1	-0.124812	-0.11635	-0.897893	-0.91571	1.21446	1.25912	1.01434	0.485933	-0.984017	-1.00933	1.25912	1.24884
NG_051007.1	C2CD6	0.456426	0.463683	1.20272	1.16785	-0.182096	-1.76375	0.32861	0.48693	-1.40815	-1.37803	-1.76375	-1.72113
NG_051022.1	SPEG	NA	NA	NA	NA	NA	NA	NA	NA	NA	NA	NA	NA
NG_051023.1	LRP1B	0.0593878	0.0596699	-0.468374	-0.503719	0.190124	-0.403737	-0.685376	0.488464	0.163826	0.106522	-0.403737	-0.448149
NG_051033.1	ADD3	NA	NA	NA	NA	NA	NA	NA	NA	NA	NA	NA	NA
NG_051040.1	GALNT14	NA	NA	NA	NA	NA	NA	NA	NA	NA	NA	NA	NA
NG_051044.1	BABAM2	0.189811	0.205836	-0.315995	-0.332851	1.49592	-0.422808	-0.189051	0.488946	1.15393	1.09536	-0.422808	-0.44604
NG_051045.1	DNAJC13	0.458372	0.458719	-0.683675	-0.703983	-1.73282	-0.72717	1.13858	0.490328	1.35399	1.31503	-0.72717	-0.752345
NG_051047.1	ULK4	0.421482	0.428389	1.08777	1.08238	-1.55495	-1.58726	1.59683	0.490511	0.01159	-0.0155482	-1.58726	-1.63268
NG_051059.1	NEDD8	NA	NA	NA	NA	NA	NA	NA	NA	NA	NA	NA	NA
NG_051070.1	PCNX1	-0.10873	-0.0949571	0.437439	0.417399	-0.63564	1.57364	-0.391358	0.491505	0.880428	0.849332	1.57364	1.54548
NG_051072.1	NEDD4	0.295223	0.296841	-3.38458	-3.41845	0.28358	-0.324113	0.139801	0.491603	0.0464107	0.020548	-0.324113	-0.348952
NG_051073.1	SOS2	NA	NA	NA	NA	NA	NA	NA	NA	NA	NA	NA	NA
NG_051075.1	NEMF	0.836199	0.836295	-1.40835	-1.41918	1.17652	-1.08784	-0.318108	0.491756	1.12772	1.10308	-1.08784	-1.1033
NG_051091.1	ATG2B	NA	NA	NA	NA	NA	NA	NA	NA	NA	NA	NA	NA
NG_051107.1	VMP1	NA	NA	NA	NA	NA	NA	NA	NA	NA	NA	NA	NA
NG_051183.1	PDE1C	-0.447676	-0.439951	-0.87862	-0.911595	-0.814357	2.03231	0.0792507	0.492169	0.184239	0.156917	2.03231	2.03791
NG_051184.1	NUP205	-0.940669	-0.940281	-0.136445	-0.151307	-0.647445	1.26302	-0.375105	0.493665	1.60938	1.59705	1.26302	1.25159
NG_051188.1	PGPEP1	NA	NA	NA	NA	NA	NA	NA	NA	NA	NA	NA	NA
NG_051199.1	SND1	-0.956591	-0.888078	0.652746	0.614716	0.086254	0.0857456	0.729912	0.493941	1.36183	1.28309	0.0857456	0.0519212
NG_051202.1	PRR12	-0.130263	-0.122907	0.659765	0.651405	-0.298626	1.27181	-0.364043	0.494031	-0.127104	-0.14044	1.27181	1.26028
NG_051203.1	TSHZ3	1.42865	1.41863	0.143158	0.126655	-0.915968	0.169749	-0.414041	0.494245	-0.705386	-0.723612	0.169749	0.148456
NG_051212.1	ZNF420	NA	NA	NA	NA	NA	NA	NA	NA	NA	NA	NA	NA
NG_051221.1	ZNF224	NA	NA	NA	NA	NA	NA	NA	NA	NA	NA	NA	NA
NG_051223.1	SEZ6	0.915159	0.928692	-1.12442	-1.13499	-1.57726	0.995234	1.52373	0.496857	-0.128633	-0.147218	0.995234	0.978638
NG_051224.1	HIPK4	0.966665	0.854668	-1.28116	-1.29878	0.391168	0.994165	0.636206	0.497585	0.693988	0.577964	0.994165	0.865616
NG_051230.1	SCG5	1.27237	1.29646	-1.8026	-1.81319	-1.32874	1.08088	0.8996	0.498918	-0.782388	-0.800536	1.08088	1.06424
NG_051236.1	CSNK1G1	NA	NA	NA	-2.77014	NA	NA	NA	NA	NA	1.27667	NA	0.351124
NG_051240.1	KLHL9	-3.86552	-3.89643	-0.245962	-0.271528	-0.0383759	0.58183	0.0867725	0.501509	0.4716	0.435982	0.58183	0.551694
NG_051241.1	ARRDC3	0.805273	0.80862	-0.608659	-0.608961	0.952813	-0.958002	1.09908	0.503355	-0.487867	-0.493968	-0.958002	-0.960637
NG_051244.1	TTBK1	NA	NA	NA	NA	NA	NA	NA	NA	NA	NA	NA	NA
NG_051252.1	NTN4	1.977	1.97112	-0.854791	-0.867428	0.668415	-0.669751	1.49011	0.504271	-0.792551	-0.810404	-0.669751	-0.685287
NG_051267.1	GET3	0.836825	0.847708	0.179457	0.156389	0.0471682	0.218771	0.329037	0.504936	-0.0700088	-0.105171	0.218771	0.187579
NG_051287.1		1.08805	1.09927	0.146218	0.0876215	-1.21999	1.11582	0.357942	0.506525	0.306058	0.2198	1.11582	1.02273
NG_051289.1	DPCD	0.920331	0.940424	0.373577	0.363327	-1.66629	0.913414	0.573449	0.508653	0.678357	0.660116	0.913414	0.899159
NG_051291.1	ELMOD3	NA	NA	NA	NA	NA	NA	NA	NA	NA	NA	NA	NA
NG_051298.1	SDK1	0.486556	0.499892	1.14652	1.11354	2.67268	-1.23132	0.91456	0.512009	-0.849344	-0.841758	-1.23132	-1.21098
NG_051308.1	RHOA	1.02106	1.02793	-1.26129	-1.2737	1.13227	1.03886	0.977783	0.513164	-1.39857	-1.41695	1.03886	1.02108
NG_051313.1	MYT1L	NA	NA	NA	NA	NA	NA	NA	NA	NA	NA	NA	NA
NG_051314.1	BAZ2B	1.19294	1.21349	1.78475	1.77391	-0.811771	1.23107	-0.450636	0.514007	-0.641526	-0.672034	1.23107	1.21198
NG_051329.1	SEMA3D	0.806811	0.805329	0.877938	0.860617	-0.276377	-2.61676	-0.50977	0.515806	0.56413	0.543421	-2.61676	-2.60537
NG_051331.1	CALM3	1.80854	1.832	-0.905253	-0.92918	1.76378	1.67857	-0.0114124	0.516354	-0.591772	-0.618534	1.67857	1.67766
NG_051333.1	LIPT2	0.302438	0.309373	-2.63129	-2.6478	0.316845	-0.844801	-1.01494	0.516436	1.015	0.986124	-0.844801	-0.868378
NG_051334.1	SLC25A46	NA	NA	NA	NA	NA	NA	NA	NA	NA	NA	NA	NA
NG_051335.2	KIAA0586	NA	NA	NA	NA	NA	NA	NA	NA	NA	NA	NA	NA
NG_051360.1	MTSS2	NA	NA	NA	NA	NA	NA	NA	NA	NA	NA	NA	NA
NG_051361.1	SNAI1P1	0.321326	0.337082	-2.57549	-2.625	-1.70812	1.11916	0.397835	0.519318	1.11869	1.10282	1.11916	1.10735
NG_051363.1	TTN-AS1	NA	NA	NA	NA	NA	NA	NA	NA	NA	NA	NA	NA
NG_051489.1	ZNF772	0.353309	0.376519	0.402299	0.379358	-2.92477	-0.0721482	0.0990439	0.521794	1.62149	1.59328	-0.0721482	-0.107766
NG_051554.1	RUFY3	NA	NA	NA	NA	NA	NA	NA	NA	NA	NA	NA	NA
NG_051558.1	SV2B	-0.674932	-0.668767	1.01726	0.991462	-0.490891	0.0459273	1.02067	0.525789	1.08374	1.05123	0.0459273	0.0221742
NG_051561.2	LCOR	0.711196	0.735884	-0.362019	-0.414102	-0.482102	0.129038	0.0640919	0.52581	1.45998	1.38112	0.129038	0.060651
NG_051566.1	ABLIM3	0.436536	0.451395	-3.00516	-3.02782	-1.19615	0.422932	0.816147	0.525996	0.204197	0.17943	0.422932	0.402617
NG_051568.1	PPIP5K2	0.340834	0.35632	0.0879793	0.0718024	-1.81133	0.591228	-1.29991	0.527356	1.19964	1.17962	0.591228	0.571924
NG_051569.1	GUF1	-0.0493406	-0.0410009	1.16992	1.15287	0.345333	0.344179	0.504482	0.527788	1.97705	1.95486	0.344179	0.315006
NG_051570.1	SPATA5	NA	NA	NA	NA	NA	NA	NA	NA	NA	NA	NA	NA
NG_051574.1	DROSHA	0.785368	0.797084	-1.0519	-1.07484	-0.704692	1.29949	-0.918219	0.529815	0.997946	0.98307	1.29949	1.2895
NG_051577.1	CNNM1	NA	NA	NA	NA	NA	NA	NA	NA	NA	NA	NA	NA
NG_051580.1	THADA	1.02446	1.03049	-0.150965	-0.163733	-0.831568	-1.03686	2.5051	0.530489	-1.30404	-1.3126	-1.03686	-1.04506
NG_051586.1	CLDN22	-0.686296	-0.680204	-0.84991	-0.871596	-0.761742	1.18746	1.88904	0.530558	-1.45958	-1.49525	1.18746	1.17955
NG_051589.1	SSBP2	NA	NA	NA	NA	NA	NA	NA	NA	NA	NA	NA	NA
NG_051591.1	ZFR	-0.991429	-0.995227	1.9095	1.89624	-0.353511	1.2636	1.46732	0.531024	-0.299157	-0.330911	1.2636	1.24228
NG_051594.1	YTHDC2	-0.458659	-0.461637	0.870712	0.837739	2.12099	-1.01094	-0.826278	0.533426	0.288957	0.238161	-1.01094	-1.06795
NG_051595.1	TRIM8	0.968164	0.980422	-1.11429	-1.13309	-0.366283	0.874562	-0.986891	0.533537	-1.67926	-1.70759	0.874562	0.850222
NG_051602.1	CDC14A	NA	NA	NA	NA	NA	NA	NA	NA	NA	NA	NA	NA
NG_051606.1	RIPOR2	0.16314	0.170652	-1.72056	-1.73101	0.615391	1.40246	-0.846372	0.534492	1.22745	1.1989	1.40246	1.37645
NG_051609.1	UFSP2	NA	NA	NA	NA	NA	NA	NA	NA	NA	NA	NA	NA
NG_051619.2	CD24P3	0.75354	0.752839	1.32493	1.29853	0.230719	0.397838	0.336989	0.534631	0.450612	0.400699	0.397838	0.352198
NG_051626.1	SLC35G1	-0.055599	-0.052068	0.364789	NA	-0.906308	0.883363	0.163801	0.535376	0.079152	NA	0.883363	NA
NG_051627.1	ARHGAP24	0.870894	0.877039	-0.489975	-0.524323	0.639558	-0.34522	0.793456	0.536547	-1.43118	-1.47828	-0.34522	-0.385598
NG_051648.1	C12orf4	-0.860882	-0.850791	-1.40786	-1.44173	-1.91641	2.04093	0.680672	0.537984	1.28731	1.26407	2.04093	2.02797
NG_051651.1	LYRM4	0.699903	0.705426	-1.07423	-1.07572	0.722031	0.729124	-0.204546	0.53864	0.723109	0.699439	0.729124	0.70758
NG_051652.1	ZNF287	NA	NA	NA	NA	NA	NA	NA	NA	NA	NA	NA	NA
NG_051656.1	DSCAML1	0.882592	0.89384	-1.02701	-1.0502	-0.698567	1.36499	1.43938	0.539345	0.813648	0.784785	1.36499	1.34112
NG_051657.1	ARHGAP20	1.05726	1.06328	1.20899	1.19428	-0.696653	-0.627393	-0.933038	0.539501	-0.850829	-0.890451	-0.627393	-0.661983
NG_051658.1	XPO5	-1.28898	-1.27908	-2.01363	-2.02855	0.422184	0.784725	0.693238	0.539626	-1.40689	-1.4297	0.784725	0.765027
NG_051659.1	SRGAP1	NA	NA	NA	NA	NA	NA	NA	NA	NA	NA	NA	NA
NG_051660.1	LRFN5	0.808121	0.8222	0.889209	0.880221	1.13606	1.42426	1.4111	0.539938	-0.875189	-0.903211	1.42426	1.41386
NG_051662.1	UNC79	NA	NA	NA	NA	NA	NA	NA	NA	NA	NA	NA	NA
NG_051663.1	WDR48	0.238512	0.254573	0.954588	0.953906	0.923804	1.08666	-1.61753	0.540733	-0.358414	-0.381055	1.08666	1.0827
NG_051664.1	RELCH	1.73425	1.76611	-1.12864	-1.16621	-0.0130208	2.07418	-0.178231	0.544586	0.707897	0.693334	2.07418	2.08767
NG_051667.1	RALGAPA1	-1.67688	-1.66415	-0.758507	-0.781375	-1.27671	1.20929	-1.28608	0.544608	-0.158706	-0.19448	1.20929	1.17418
NG_051668.1	USP28	-0.0180195	-0.01158	-1.01795	-1.04247	-0.663816	1.443	-1.51877	0.545602	1.22909	1.20534	1.443	1.42365
NG_051671.1	CTR9	1.1524	1.16676	-0.241295	-0.247365	1.13137	-0.355825	0.377286	0.548697	1.62018	1.5955	-0.355825	-0.364907
NG_051763.1	NME7	NA	NA	NA	NA	NA	NA	NA	NA	NA	NA	NA	NA
NG_051764.1	MDGA1	1.29429	1.32046	-1.92368	-1.99521	-0.127968	0.59518	1.07337	0.549114	0.0870139	0.0378791	0.59518	0.560372
NG_051765.1	DOCK5	0.58139	0.595758	-2.00789	-1.9897	-0.751281	-1.0681	0.539025	0.551019	-0.687664	-0.697412	-1.0681	-1.06874
NG_051800.1	DOCK2	0.789786	0.805123	0.97616	0.936783	1.03407	-0.174047	0.00651553	0.551915	-0.0569058	-0.0618639	-0.174047	-0.167763
NG_051801.1	MICAL2	NA	NA	NA	NA	NA	NA	NA	NA	NA	NA	NA	NA
NG_051803.1	TENM4	-0.103156	-0.0921994	-0.445079	-0.462509	-1.21463	1.60411	-1.04642	0.553668	-1.06458	-1.08459	1.60411	1.55475
NG_051805.1	PCF11	NA	NA	NA	NA	NA	NA	NA	NA	NA	NA	NA	NA
NG_051806.1	MRRF	-0.800318	-0.799421	-0.325914	-0.347579	-1.0045	-0.338082	-1.30418	0.554613	1.78337	1.73858	-0.338082	-0.364078
NG_051811.1	ATG13	NA	NA	NA	NA	NA	NA	NA	NA	NA	NA	NA	NA
NG_051812.1	PGAP2	NA	NA	NA	NA	NA	NA	NA	NA	NA	NA	NA	NA
NG_051813.1	BHLHE22	NA	NA	NA	NA	NA	NA	NA	NA	NA	NA	NA	NA
NG_051816.1	COBL	-0.360168	-0.353963	0.0739503	0.0588803	2.0296	1.5099	-0.680851	0.557178	-0.207196	-0.230144	1.5099	1.4949
NG_051818.1	LGR4	-0.727564	-0.711008	-0.804635	-0.821901	1.42555	-0.204453	-0.601913	0.557191	2.11013	2.084	-0.204453	-0.227088
NG_051820.1	UBN1	0.766187	0.790318	0.915508	0.914954	0.616925	0.906742	0.975864	0.559711	0.879639	0.871171	0.906742	0.90155
NG_051822.1	AHNAK	NA	NA	NA	NA	NA	NA	NA	NA	NA	NA	NA	NA
NG_051825.1	CEP83	-0.0912542	-0.0857579	-1.07826	-1.08621	-0.32119	0.849889	-0.21804	0.561586	1.37198	1.34535	0.849889	0.828314
NG_051831.1	GABRB1	0.174614	0.18401	-1.75517	-1.77113	0.179954	0.635251	1.22877	0.564245	-1.95063	-1.97792	0.635251	0.593297
NG_051834.1	RCC2	1.67049	1.69518	1.58124	1.58141	1.67035	1.1512	-1.08354	0.56457	0.260673	0.241234	1.1512	1.14293
NG_051835.1	TAOK3	NA	NA	NA	NA	NA	NA	NA	NA	NA	NA	NA	NA
NG_051927.1	SASH1	0.696114	0.695192	-2.12129	-2.10942	-0.975321	-0.816238	0.0776111	0.566081	0.501347	0.478731	-0.816238	-0.822233
NG_051931.1	FILIP1	-0.211379	-0.211364	-1.74528	-1.82069	-0.496499	-0.821057	0.501942	0.568359	1.00819	0.96762	-0.821057	-0.888682
NG_051932.1	PHIP	0.211926	0.226953	-0.401069	-0.429115	0.00275332	-0.0223846	0.10286	0.571215	1.01399	0.955518	-0.0223846	-0.0637587
NG_051933.1	CADM3	0.429417	NA	0.553329	NA	NA	0.696389	NA	0.57171	-0.0620876	NA	0.696389	NA
NG_051941.1	TDRD6	-0.453399	-0.446619	-2.67168	-2.70576	0.247415	0.34582	1.17373	0.57284	0.132526	0.0918485	0.34582	0.309777
NG_051942.1	L3MBTL3	0.993702	1.00458	-0.294075	-0.339136	0.291503	-0.790034	-0.294871	0.572947	1.05687	0.995044	-0.790034	-0.847489
NG_051943.1	FAXC	-0.211976	-0.201728	0.61462	0.565624	-3.10809	0.0176613	-0.396464	0.573332	1.74188	1.67214	0.0176613	-0.0408059
NG_051945.1	SLC6A17	0.674583	0.689259	-1.36313	-1.39131	-1.30022	0.819821	0.890874	0.576716	0.275917	0.252959	0.819821	0.804631
NG_051949.1	FIGNL1	-0.271639	-0.264788	0.202438	0.181026	1.24099	-0.187158	0.903702	0.577456	1.05549	1.0343	-0.187158	-0.220105
NG_051950.1	ZKSCAN1	NA	NA	NA	NA	NA	NA	NA	NA	NA	NA	NA	NA
NG_051951.1	RINT1	NA	NA	NA	NA	NA	NA	NA	NA	NA	NA	NA	NA
NG_051954.1	VKORC1L1	NA	NA	NA	NA	NA	NA	NA	NA	NA	NA	NA	NA
NG_051955.1	CCDC71L	NA	NA	NA	NA	NA	NA	NA	NA	NA	NA	NA	NA
NG_051966.1	FGF12	-0.460623	-0.450647	0.645226	0.597629	-0.672499	0.616993	-0.503724	0.577774	0.715503	0.652508	0.616993	0.560478
NG_051977.1	RAB11FIP4	NA	NA	NA	NA	NA	NA	NA	NA	NA	NA	NA	NA
NG_051989.1	TIAF1	NA	NA	NA	NA	NA	NA	NA	NA	NA	NA	NA	NA
NG_052003.1	KCTD17	0.719366	0.717781	-0.936501	-0.944345	-1.28086	0.189876	0.314957	0.579238	-0.00376487	-0.0205135	0.189876	0.175072
NG_052594.1	PI4K2B	-0.911854	-0.905361	-0.53168	-0.561277	1.17557	0.79777	0.0701745	0.581486	0.921295	0.902742	0.79777	0.782232
NG_052595.1	TNFRSF12A	NA	NA	NA	NA	NA	NA	NA	NA	NA	NA	NA	NA
NG_052602.1	PARD3	-0.134038	-0.109344	-0.18254	-0.192856	-0.772718	-0.98763	2.34109	0.58176	-1.1181	-1.11972	-0.98763	-0.987702
NG_052613.1	CCDC15	-0.114119	-0.114712	-0.849312	-0.86752	0.106966	0.108942	1.57159	0.583361	-0.0595171	-0.0846106	0.108942	0.0860407
NG_052614.1	ZNF184	-0.393137	-0.367295	2.44426	2.41859	1.29086	0.0635887	1.37176	0.584621	0.574267	0.537213	0.0635887	0.0335286
NG_052621.1	BTBD11	-1.40712	-1.39519	-0.416315	-0.43668	0.110734	0.592031	-1.32753	0.58556	-2.22665	-2.25887	0.592031	0.567565
NG_052622.1	USP44	0.235722	0.247635	-3.49285	-3.49944	0.43926	0.32669	0.673327	0.586795	-0.648045	-0.660999	0.32669	0.316086
NG_052634.1	CCDC171	0.316361	0.328233	0.274603	0.25595	-0.767807	-1.74512	0.774996	0.587	-0.692432	-0.722869	-1.74512	-1.77359
NG_052636.1	OGDHL	NA	NA	NA	NA	NA	NA	NA	NA	NA	NA	NA	NA
NG_052669.1	CELSR2	-2.46742	-2.49172	0.148498	0.135578	0.109106	0.607227	0.639294	0.587381	0.6253	0.610502	0.607227	0.595814
NG_052672.1	KCNN4	1.49895	1.48812	-0.559332	-0.580269	0.849854	-0.645227	0.385325	0.589349	0.54534	0.518909	-0.645227	-0.669902
NG_052673.1	MGMT	NA	NA	NA	NA	NA	NA	NA	NA	NA	NA	NA	NA
NG_052783.1	STK39	NA	NA	NA	NA	NA	NA	NA	NA	NA	NA	NA	NA
NG_052800.1	ARID2	0.112731	0.1422	0.319123	0.259945	1.3777	-0.813672	-0.392501	0.594969	-0.62309	-0.689224	-0.813672	-0.865587
NG_052808.1	TMEM132D	NA	NA	NA	NA	NA	NA	NA	NA	NA	NA	NA	NA
NG_052811.1	CACNB1	1.53111	1.5239	-1.20179	-1.20182	0.789994	-0.756845	0.956787	0.59539	1.7933	1.76771	-0.756845	-0.763803
NG_052813.1	FAT3	-1.04797	-1.02648	0.310408	0.282813	-0.131412	0.691869	0.82206	0.59563	0.180203	0.141755	0.691869	0.652173
NG_052819.1	CDH13	1.5163	1.52189	0.171332	0.157323	-0.573987	0.0913717	1.74188	0.595896	-1.57751	-1.59146	0.0913717	0.0727711
NG_052822.1	DNAJC21	0.943674	0.886275	-1.30782	-1.32316	-0.640307	-0.472374	0.0585671	0.598937	1.69365	1.68081	-0.472374	-0.49012
NG_052823.1	CHD4	1.56846	1.58312	-1.08417	-1.10198	-0.58462	1.54679	1.49093	0.598984	-0.396512	-0.417839	1.54679	1.53789
NG_052828.1	BPTF	0.588858	0.59727	-2.09774	-2.0949	0.470481	-0.66997	0.532888	0.600009	-0.952942	-0.965311	-0.66997	-0.681808
NG_052829.1	GRIN2D	-0.507425	-0.495329	-1.42007	-1.44213	-1.7961	-0.099605	-0.213215	0.600555	1.26761	1.23237	-0.099605	-0.129313
NG_052830.1	FIZ1	1.46959	1.49853	0.516951	0.501656	0.570852	0.62229	1.30336	0.601214	0.236263	0.205178	0.62229	0.600899
NG_052831.1	GRM5	0.607397	0.618378	-0.400133	-0.429427	0.808131	1.34586	0.846058	0.601389	0.291784	0.258029	1.34586	1.32376
NG_052835.1	AFF3	-0.0439159	-0.0235373	0.00810187	-0.0424973	-0.153472	1.19239	0.473415	0.601633	1.1198	1.0157	1.19239	1.09478
NG_052836.1	MAP2	-0.13169	-0.120367	0.909005	0.879855	-0.258683	1.02009	0.143887	0.604105	-1.10421	-1.1406	1.02009	0.983359
NG_052839.1	GRB14	NA	NA	NA	NA	NA	NA	NA	NA	NA	NA	NA	NA
NG_052840.1	MAP4	0.492374	0.499827	0.280222	0.247476	0.66847	-1.56968	-0.0112048	0.604817	0.510744	0.457591	-1.56968	-1.56982
NG_052841.1	MAP6	NA	NA	NA	NA	NA	NA	NA	NA	NA	NA	NA	NA
NG_052843.1	ENOX1	0.285119	0.294345	0.104022	0.0668181	-0.371722	-1.17797	0.657143	0.607545	-0.192475	-0.242871	-1.17797	-1.21526
NG_052855.1	SIN3A	0.771994	0.781634	0.901438	0.877372	-2.08594	0.347468	-0.757266	0.607647	-0.0741463	-0.0967842	0.347468	0.323845
NG_052856.1	TBC1D25	1.16412	1.16859	0.688339	0.672941	0.994588	-0.532579	0.910898	0.609144	-0.360935	-0.374813	-0.532579	-0.543232
NG_052857.1	TRAPPC3	NA	NA	NA	NA	NA	NA	NA	NA	NA	NA	NA	NA
NG_052859.1	IFT81	-0.748167	-0.730266	-1.21353	-1.22013	1.75702	-0.352258	1.93132	0.609928	-0.223202	-0.246399	-0.352258	-0.370871
NG_052860.1	ADIPOR1	-1.49904	-1.49013	-1.14708	-1.15993	-1.3859	0.81387	0.961131	0.610107	0.776263	0.756536	0.81387	0.796855
NG_052869.1	POP1	-0.718873	-0.713646	-1.13117	-1.16326	-1.50167	1.46344	1.47523	0.611378	1.30407	1.28626	1.46344	1.45122
NG_052871.1	RPH3A	NA	NA	NA	NA	NA	NA	NA	NA	NA	NA	NA	NA
NG_052872.1	UNC13A	NA	NA	NA	NA	NA	NA	NA	NA	NA	NA	NA	NA
NG_052873.1	KMT5B	NA	NA	NA	NA	NA	NA	NA	NA	NA	NA	NA	NA
NG_052874.1	SBNO1	NA	NA	NA	NA	NA	NA	NA	NA	NA	NA	NA	NA
NG_052877.1	POLE2	NA	NA	NA	NA	NA	NA	NA	NA	NA	NA	NA	NA
NG_052878.1	PPP1CB	0.701889	0.699624	0.570965	0.55334	0.472144	-1.28715	-0.894013	0.612923	1.03689	1.00327	-1.28715	-1.26697
NG_052879.1	PRKD1	0.409971	0.417914	-1.61125	-1.65497	-0.270612	-0.149287	0.208755	0.613529	0.0437567	0.00804325	-0.149287	-0.183147
NM_000064.3	C3	NA	NA	NA	NA	NA	NA	NA	NA	NA	NA	NA	NA
NM_000067.2	CA2	NA	NA	NA	NA	NA	NA	NA	NA	NA	NA	NA	NA
NM_000108.4	DLD	-0.432467	-0.460391	1.41207	1.28462	-0.749278	-0.037181	0.113803	0.614656	1.90588	1.7458	-0.037181	-0.242202
NM_000137.2	FAH	-1.29154	-1.31091	0.227866	0.197776	-0.308778	1.05262	0.480768	0.615494	-0.159039	-0.224014	1.05262	1.03709
NM_000138.4	FBN1	-0.394966	-0.396642	0.706583	0.661358	-1.63782	0.195993	0.709473	0.615752	0.216427	0.152611	0.195993	0.137775
NM_000147.4	FUCA1	-3.62789	-3.65345	0.515676	0.496388	-0.532229	0.48239	0.617246	0.621091	0.469197	0.43752	0.48239	0.455572
NM_000165.4	GJA1	NA	1.5417	NA	NA	0.279226	NA	0.253783	NA	NA	NA	NA	NA
NM_000182.4	HADHA	0.53088	0.551522	0.707548	0.683475	0.516475	0.405729	0.0644997	0.623274	0.0967195	0.0577137	0.405729	0.372686
NM_000194.2	HPRT1	NA	NA	NA	NA	NA	NA	NA	NA	NA	NA	NA	NA
NM_000216.3	ANOS1	-1.00603	-1.00639	0.230678	0.199099	-1.4164	2.07748	-0.0962566	0.624554	0.874463	0.836732	2.07748	2.06221
NM_000232.4	SGCB	0.0804525	0.0986403	0.8693	0.869076	0.256219	0.744474	-0.123688	0.625416	1.37884	1.37809	0.744474	0.734424
NM_000240.3	MAOA	NA	NA	NA	NA	NA	NA	NA	NA	NA	NA	NA	NA
NM_000266.3	NDP	NA	NA	NA	NA	NA	NA	NA	NA	NA	NA	NA	NA
NM_000314.6	PTEN	-0.0188192	-0.00391307	0.355922	0.326583	0.359343	0.554942	0.192757	0.627382	1.34468	1.31182	0.554942	0.518714
NM_000346.3	SOX9	NA	NA	NA	NA	NA	NA	NA	NA	NA	NA	NA	NA
NM_000387.5	SLC25A20	NA	NA	NA	NA	NA	NA	NA	NA	NA	NA	NA	NA
NM_000414.3	HSD17B4	0.325941	0.383858	0.0802762	0.032778	0.725262	0.964274	0.756647	0.631952	0.415035	0.357184	0.964274	0.946502
NM_000434.3	NEU1	1.39189	1.43417	-1.15616	-1.23168	0.196553	0.0667772	0.526506	0.633371	-1.17148	-1.27752	0.0667772	-0.00615929
NM_000439.4	PCSK1	-2.7574	-2.74964	0.1044	0.0867005	0.362081	0.441765	-0.00869578	0.635298	0.872602	0.843197	0.441765	0.417236
NM_000551.3	VHL	NA	NA	NA	NA	NA	NA	NA	NA	NA	NA	NA	NA
NM_000599.3	IGFBP5	NA	NA	NA	NA	NA	NA	NA	NA	NA	NA	NA	NA
NM_000700.2	ANXA1	-0.569959	-0.563671	0.975769	0.959487	-0.0164514	2.47921	-0.4127	0.637959	0.859955	0.830624	2.47921	2.4699
NM_000713.2	BLVRB	1.34994	1.36304	0.618256	0.579079	-0.465626	-0.424981	0.630746	0.642014	0.987385	0.922404	-0.424981	-0.470336
NM_000775.3	CYP2J2	NA	NA	NA	NA	NA	NA	NA	NA	NA	NA	NA	NA
NM_000809.3	GABRA4	-1.07656	-1.06246	-0.00477717	-0.018283	-0.583878	-0.676012	-0.290139	0.642173	0.841428	0.816655	-0.676012	-0.688715
NM_000828.4	GRIA3	-0.325759	-0.316829	-0.237375	-0.266682	-0.248581	1.58989	-0.170405	0.643938	0.0795374	0.0474552	1.58989	1.61082
NM_000876.3	IGF2R	-0.314384	-0.29598	-1.16505	-1.21027	-1.01394	0.821919	0.551352	0.647175	-0.110412	-0.1523	0.821919	0.801708
NM_000898.4	MAOB	NA	NA	NA	NA	NA	NA	NA	NA	NA	NA	NA	NA
NM_000899.4	KITLG	NA	NA	NA	NA	NA	NA	NA	NA	NA	NA	NA	NA
NM_000918.3	P4HB	1.16623	1.21854	-0.0155399	-0.0564758	-0.0383206	-0.226842	0.533988	0.647721	1.19925	1.15366	-0.226842	-0.287973
NM_000937.4	POLR2A	-1.24196	-1.19794	-1.01748	-1.05616	0.783982	-0.304578	0.0352935	0.648107	0.684681	0.625013	-0.304578	-0.356139
NM_000941.2	POR	-1.84748	-1.85098	1.13536	1.09305	-0.431207	0.0373901	0.757097	0.649501	-0.322228	-0.394385	0.0373901	-0.0243912
NM_000946.2	PRIM1	NA	NA	NA	NA	NA	NA	NA	NA	NA	NA	NA	NA
NM_000964.3	RARA	NA	1.55055	NA	-1.67457	0.6949	NA	0.966602	NA	NA	0.865997	NA	-0.0445054
NM_000975.3	RPL11	NA	NA	NA	NA	NA	NA	NA	NA	NA	NA	NA	NA
NM_001001330.2	REEP3	NA	NA	NA	NA	NA	NA	NA	NA	NA	NA	NA	NA
NM_001001563.3	TIMM50	0.916211	0.948967	0.608623	0.566751	-0.722316	0.0855944	-0.285542	0.650453	0.0848543	0.017795	0.0855944	0.0284989
NM_001001661.2	ZNF425	NA	NA	NA	NA	NA	NA	NA	NA	NA	NA	NA	NA
NM_001001973.2	ATP5F1C	NA	NA	NA	NA	NA	NA	NA	NA	NA	NA	NA	NA
NM_001002860.3	BTBD7	0.54723	0.572065	0.249287	0.226736	-2.42251	0.614913	0.104907	0.651257	0.801099	0.77166	0.614913	0.588594
NM_001003681.2	HMGXB4	NA	NA	NA	NA	NA	NA	NA	NA	NA	NA	NA	NA
NM_001003943.2	BMF	0.735069	NA	-0.00969344	NA	NA	0.907267	NA	0.651676	1.13669	NA	0.907267	NA
NM_001007.4	RPS4X	0.356411	0.383844	1.51267	1.49216	-2.90113	0.332497	0.51195	0.652084	0.106556	0.0694007	0.332497	0.301406
NM_001007102.3	L3MBTL3	-0.364027	-0.33975	0.144984	0.103292	-3.60494	0.636974	-0.0303192	0.652918	1.21482	1.13912	0.636974	0.576867
NM_001008938.3	CKAP5	-0.489072	-0.478821	0.369502	0.319583	-0.621195	0.755013	0.649663	0.655516	1.32461	1.27346	0.755013	0.698643
NM_001009955.3	SSBP3	-1.12597	-1.12466	0.352111	0.294602	-1.61944	1.34001	-0.763487	0.658084	0.325935	0.240779	1.34001	1.28632
NM_001010898.3	SLC6A17	0.940523	1.00098	0.60128	0.563907	-0.531466	0.0708204	0.456521	0.658175	-1.18469	-1.30912	0.0708204	-0.00107772
NM_001010926.3	HES5	NA	NA	NA	NA	NA	NA	NA	NA	NA	NA	NA	NA
NM_001011645.3	AR	NA	0.682302	NA	-0.236314	1.14671	NA	-1.35206	NA	NA	-0.250749	NA	0.439194
NM_001011713.2	NAA30	NA	NA	NA	NA	NA	NA	NA	NA	NA	NA	NA	NA
NM_001012279.2	SOGA3	NA	NA	NA	NA	NA	NA	NA	NA	NA	NA	NA	NA
NM_001012994.1	SNX30	NA	NA	NA	NA	NA	NA	NA	NA	NA	NA	NA	NA
NM_001014.4	RPS10	NA	NA	NA	NA	NA	NA	NA	NA	NA	NA	NA	NA
NM_001014809.2	CRMP1	-0.229725	-0.221589	0.746207	0.732577	-0.647492	-1.02411	-0.0608437	0.659286	0.133925	0.110725	-1.02411	-1.04871
NM_001014840.1	CUTA	NA	NA	NA	NA	NA	NA	NA	NA	NA	NA	NA	NA
NM_001015877.1	PHF6	-0.30561	-0.278549	-0.335837	-0.390544	-1.19994	0.26803	-0.226879	0.660421	2.72511	2.65199	0.26803	0.199003
NM_001017923.1	C14orf28	NA	NA	NA	NA	NA	NA	NA	NA	NA	NA	NA	NA
NM_001018024.2	CMC4	NA	NA	NA	NA	NA	NA	NA	NA	NA	NA	NA	NA
NM_001020.5	RPS16	NA	NA	NA	NA	NA	NA	NA	NA	NA	NA	NA	NA
NM_001024808.2	BCL7A	-0.31128	-0.260483	0.337963	0.272208	-0.284184	-1.58376	-0.327477	0.661386	0.993159	0.878378	-1.58376	-1.60416
NM_001029858.3	SLC35F1	NA	NA	NA	NA	NA	NA	NA	NA	NA	NA	NA	NA
NM_001030060.2	SAMD5	NA	NA	NA	NA	NA	NA	NA	NA	NA	NA	NA	NA
NM_001031689.2	PLAA	-0.307208	-0.285046	2.71184	2.68466	-0.944734	0.165043	0.132461	0.665255	1.09185	1.01924	0.165043	0.0926949
NM_001031732.3	YTHDC1	NA	NA	NA	NA	NA	NA	NA	NA	NA	NA	NA	NA
NM_001034850.2	RETREG1	NA	NA	NA	NA	NA	NA	NA	NA	NA	NA	NA	NA
NM_001037666.2	CASTOR1	0.654097	0.681024	-0.157873	-0.183732	-0.640136	0.205597	0.836352	0.665792	0.0304198	-0.00708101	0.205597	0.175711
NM_001039111.2	TRIM71	NA	NA	NA	NA	NA	NA	NA	NA	NA	NA	NA	NA
NM_001042353.2	FAM110A	1.38098	1.38059	0.564668	0.544514	-2.90402	0.582401	-0.464354	0.666131	0.309016	0.284876	0.582401	0.55883
NM_001042465.2	PSAP	0.362657	0.398113	0.708315	0.699744	-0.111825	0.154534	0.29836	0.667165	0.232258	0.197088	0.154534	0.12457
NM_001042603.2	KDM5A	NA	NA	NA	NA	NA	NA	NA	NA	NA	NA	NA	NA
NM_001042724.1	NECTIN2	0.195059	0.210785	-1.44486	-1.47091	-0.552028	0.605831	-0.200457	0.667276	0.864901	0.838042	0.605831	0.582298
NM_001048.3	SST	NA	NA	NA	NA	NA	NA	NA	NA	NA	NA	NA	NA
NM_001065.3	TNFRSF1A	0.310943	0.327638	1.04563	1.01771	-0.578494	0.00359029	1.2401	0.668286	-0.367422	-0.417877	0.00359029	-0.0390008
NM_001071775.2	MZT1	-0.0614364	-0.0488573	0.602079	0.564742	-0.214783	0.308757	-0.381879	0.669502	0.998702	0.94691	0.308757	0.262749
NM_001077693.3	ECSCR	NA	NA	NA	NA	NA	NA	NA	NA	NA	NA	NA	NA
NM_001079537.1	TRAPPC6B	NA	NA	NA	NA	NA	NA	NA	NA	NA	NA	NA	NA
NM_001079559.2	HNRNPUL2	-0.581947	-0.552972	0.0984833	0.0619191	0.614312	0.544492	-0.281051	0.671961	0.969373	0.908558	0.544492	0.493293
NM_001080379.1	PACRG	0.484207	0.510875	0.710731	0.672424	0.076446	-0.729933	0.48042	0.671974	-0.458962	-0.540608	-0.729933	-0.808223
NM_001080397.2	SLC45A1	NA	NA	NA	NA	NA	NA	NA	NA	NA	NA	NA	NA
NM_001080417.2	ZNF629	1.18163	1.20181	1.02599	1.00801	1.03443	-0.736595	-1.15993	0.672381	-0.85134	-0.892331	-0.736595	-0.772852
NM_001080432.2	FTO	-0.542845	-0.537303	1.01208	0.972744	-1.34543	0.947119	-0.276642	0.673007	1.00556	0.93687	0.947119	0.888406
NM_001080472.3	FITM2	0.319851	0.35958	0.00493117	-0.0454899	-0.851966	0.300796	-1.01452	0.67326	0.250085	0.177983	0.300796	0.239479
NM_001080495.2	TNRC18	-0.678794	-0.656204	-1.84991	-1.88961	-2.0502	0.14314	0.743438	0.674515	1.28584	1.21429	0.14314	0.0838068
NM_001080497.2	MEGF9	NA	NA	NA	NA	NA	NA	NA	NA	NA	NA	NA	NA
NM_001081640.1	PRKDC	NA	NA	NA	NA	NA	NA	NA	NA	NA	NA	NA	NA
NM_001082967.2	TAFA5	0.5297	0.552924	-0.39337	-0.44102	-0.523058	-1.01466	1.56912	0.678338	-0.00611079	-0.0762512	-1.01466	-1.07528
NM_001085454.1	GIT1	0.408339	0.452142	0.365947	0.332396	-2.13783	0.672351	-0.187659	0.680392	0.291385	0.233226	0.672351	0.628752
NM_001085471.1	FOXN3	0.590512	0.627435	-1.58857	-1.68771	1.11784	-1.54347	0.877424	0.680671	1.1791	1.12635	-1.54347	-1.6564
NM_001093725.1	MEX3A	1.09762	1.0812	-1.1287	-1.11064	-0.816037	-0.418209	-0.882749	0.681787	-0.653035	-0.670534	-0.418209	-0.436985
NM_001098504.1	DDX17	NA	NA	NA	NA	NA	NA	NA	NA	NA	NA	NA	NA
NM_001098511.2	KIF2A	-1.66893	-1.69983	1.06927	1.02506	0.347635	1.29671	0.752554	0.682154	1.11377	1.0392	1.29671	1.23809
NM_001099439.1	EPHA10	NA	NA	NA	NA	NA	NA	NA	NA	NA	NA	NA	NA
NM_001099652.1	GPR137C	-0.00146265	0.0107196	0.952356	0.929208	-3.666	0.163903	0.182052	0.682399	1.30868	1.2744	0.163903	0.131978
NM_001100420.1	C21orf91	1.26117	1.2899	-0.505093	-0.529633	0.710483	-0.123773	0.305449	0.684665	0.107238	0.0677681	-0.123773	-0.157336
NM_001100818.1	PID1	NA	NA	NA	NA	NA	NA	NA	NA	NA	NA	NA	NA
NM_001101372.1	IGLON5	NA	NA	NA	NA	NA	NA	NA	NA	NA	NA	NA	NA
NM_001101669.2	INPP4B	0.653328	0.654941	-1.94356	-1.93982	0.658721	-1.04095	1.12264	0.685774	1.35173	1.30935	-1.04095	-1.05305
NM_001105573.1	FBXO45	-0.0445778	-0.0119716	0.0154782	-0.0402162	0.365684	0.507913	0.232961	0.68856	-0.288283	-0.364225	0.507913	0.42472
NM_001109662.3	HECTD4	-1.33509	NA	-0.917904	NA	NA	1.10913	NA	0.690372	1.34457	NA	1.10913	NA
NM_001110199.2	SRRM3	-0.410467	-0.379683	-0.39933	-0.421237	-0.396727	-0.554071	-0.778873	0.692458	0.541744	0.475888	-0.554071	-0.582222
NM_001122630.1	CDKN1C	1.43121	1.42327	0.920248	0.877249	-0.1335	-0.983875	-1.75384	0.694477	0.796507	0.737579	-0.983875	-1.03197
NM_001126.3	ADSS2	-0.601341	NA	1.63895	1.6479	NA	0.130519	NA	0.696181	1.49785	1.47124	0.130519	0.0573669
NM_001127322.1	CBX5	NA	NA	NA	NA	NA	NA	NA	NA	NA	NA	NA	NA
NM_001127621.1	GALE	0.59638	0.627063	-0.433609	-0.485978	-0.267895	0.529976	1.72491	0.698036	-0.629837	-0.706154	0.529976	0.480896
NM_001130065.1	MYO9B	-2.90721	-2.88124	-0.455582	-0.488023	0.324226	-0.327241	0.699586	0.69812	-0.156931	-0.20966	-0.327241	-0.371789
NM_001130066.1	SYNGAP1	-0.537161	-0.512184	-0.0288573	-0.0587067	-1.48151	0.877928	0.43371	0.70001	0.461461	0.411822	0.877928	0.829352
NM_001130089.1	KARS1	NA	NA	NA	NA	NA	NA	NA	NA	NA	NA	NA	NA
NM_001130929.1	STMP1	-2.79562	-2.81911	0.680606	0.657242	0.698109	0.228474	0.456276	0.700568	0.624937	0.586792	0.228474	0.192773
NM_001134479.1	LRRC8D	-1.28612	-1.3034	0.657497	0.648521	0.564097	0.356917	0.541751	0.70097	0.781721	0.764138	0.356917	0.335496
NM_001134771.1	SLC12A5	-0.386413	-0.354235	0.370584	0.338519	-0.135852	0.175951	-1.40095	0.701907	0.941115	0.892744	0.175951	0.127731
NM_001135575.1	SMIM13	NA	NA	NA	NA	NA	NA	NA	NA	NA	NA	NA	NA
NM_001135690.2	PENK	NA	NA	NA	NA	NA	NA	NA	NA	NA	NA	NA	NA
NM_001136020.2	ICA1	NA	NA	NA	NA	NA	NA	NA	NA	NA	NA	NA	NA
[truncated: 1,433 more rows]

## Sheet: PFC
gene-ID	genes	Chimp (Human ref)	Chimp (Rhesus ref)	Lemur (Human ref)	Lemur (Siamang ref)	Human (Rhesus ref)	Siamang (Human Ref)	Siamang (Rhesus Ref)	Baboon (Human Ref)	Marmoset (Human Ref)	Marmoset (Siamang ref)	Rhesus (Human Ref)	Rhesus (Siamang Ref)
NG_000012.2	PCDHGC3	-0.315865	-0.196568	-0.139334	-0.103073	1.23877	0.391322	0.433754	-0.114159	2.60099	2.49082	-0.400896	-0.343171
NG_000017.2	PCDHB5	-1.77671	-1.82177	-1.01258	-1.09537	1.34173	-1.2949	-1.36348	0.962281	2.06809	2.10239	0.258892	0.237922
NG_002690.1	IPW	NA	NA	NA	NA	NA	NA	NA	NA	NA	NA	NA	NA
NG_005905.2	BRCA1	0.33963	NA	-1.16813	NA	NA	0.67831	NA	0.52432	0.982609	NA	0.375287	NA
NG_006987.1	NIPBL	NA	NA	NA	NA	NA	NA	NA	NA	NA	NA	NA	NA
NG_006988.2	SMC1A	-1.11018	-1.07182	0.226237	0.252837	-1.24697	-0.0118444	0.0271234	1.1576	1.71669	1.78374	1.11606	1.17768
NG_007009.1	CHD7	0.435383	0.513848	0.58949	0.627687	0.951254	0.613154	0.667522	0.480741	1.07019	1.0924	0.552053	0.594976
NG_007066.1	FLT3	-1.27113	-1.16639	-1.16674	-1.11556	0.630997	-0.40147	-0.357741	-0.300411	0.117861	0.116792	1.60428	1.56796
NG_007077.2	ETFA	2.44115	2.55616	0.556067	0.645181	3.10914	-0.189683	-0.069888	-0.275355	0.0916998	0.176151	-0.420288	-0.312474
NG_007083.2	ADGRV1	-0.438325	NA	-1.28178	NA	NA	1.48743	NA	1.42485	0.0151582	NA	2.03016	NA
NG_007085.2	ZIC2	-1.43371	-1.37376	-2.01939	-2.00274	-0.932025	1.44607	1.46897	-0.708276	0.642121	0.640069	-0.268772	-0.252997
NG_007088.1	ANOS1	-0.557178	-0.465155	1.39033	1.42592	-0.378201	-1.03874	-0.978298	-1.18899	0.355837	0.384394	0.147861	0.192558
NG_007092.2	CNTNAP2	0.374481	0.570987	-1.63111	-1.50784	2.11929	0.0492077	0.195158	2.39683	0.874472	0.967729	-0.771928	-0.643924
NG_007093.3	PRKAR1A	-0.432949	NA	-1.6081	NA	NA	0.892353	NA	-0.264826	1.37233	NA	-0.461724	NA
NG_007097.2	ATP2A2	NA	NA	NA	NA	NA	NA	NA	NA	NA	NA	NA	NA
NG_007098.2	VPS13B	NA	NA	NA	NA	NA	NA	NA	NA	NA	NA	NA	NA
NG_007101.2	RAI1	NA	NA	NA	NA	NA	NA	NA	NA	NA	NA	NA	NA
NG_007107.2	MECP2	NA	NA	NA	NA	NA	NA	NA	NA	NA	NA	NA	NA
NG_007109.2	MLH1	NA	-1.64793	NA	-1.84607	-0.0962159	NA	1.30728	NA	NA	0.535366	NA	0.558638
NG_007110.2	MSH2	-1.33132	-1.09094	-1.14063	-1.04133	0.142745	-0.0563016	0.118384	0.453974	2.08054	2.21386	0.454307	0.600667
NG_007149.1	BCL6	0.294999	0.374788	0.656033	0.718728	-1.28085	0.807774	0.907394	0.76516	1.22326	1.3298	0.854162	0.941017
NG_007262.1	OSTM1	0.673787	0.763063	-0.885038	-0.863105	-0.996282	-1.44669	-1.40804	-0.112216	1.80965	1.84755	1.08032	1.12727
NG_007268.1	AP3B1	-0.447004	-0.283491	-0.139141	-0.045313	-0.989355	-0.857658	-0.711807	1.1943	2.50965	2.48202	-0.529562	-0.412757
NG_007271.1	STAT5B	0.53606	0.661894	-1.10737	-0.990375	1.21455	2.04831	2.12906	1.25454	0.1013	0.186519	-0.297791	-0.192468
NG_007287.1	CA2	NA	NA	NA	NA	NA	NA	NA	NA	NA	NA	NA	NA
NG_007294.1	HADHB	0.688716	0.770741	-0.856629	-0.779557	1.71778	-0.0119186	0.0583865	-0.439964	1.90499	1.91533	-0.447636	-0.375216
NG_007370.1	STAT3	NA	NA	NA	NA	NA	NA	NA	NA	NA	NA	NA	NA
NG_007376.1	APP	-0.0792393	-0.0331273	-0.220719	-0.244438	3.56969	-0.29413	-0.300709	-0.600382	1.46478	1.56426	-0.32384	-0.348974
NG_007379.2	ATP2C1	0.266537	0.353967	-0.519475	-0.507872	0.415299	0.707473	0.775013	-1.11658	1.55999	1.61704	0.459357	0.503171
NG_007386.2	PSEN1	1.11125	1.19512	-0.709635	-0.667646	0.467294	1.96881	2.02912	-0.125048	0.130017	0.161851	-0.299931	-0.25457
NG_007394.1	IFNGR1	NA	NA	NA	NA	NA	NA	NA	NA	NA	NA	NA	NA
NG_007397.1	LYST	NA	NA	NA	NA	NA	NA	NA	NA	NA	NA	NA	NA
NG_007418.1	FANCL	0.0377377	0.120185	-1.15182	-1.10709	0.00630516	0.168641	0.225262	-0.113535	0.349097	0.38352	0.999618	1.04554
NG_007455.2	EXT1	-0.428224	-0.245707	-0.82033	-0.690159	0.115071	-0.634589	-0.485305	-0.162453	2.13276	2.15488	0.026749	0.136834
NG_007459.1	PTPN11	-0.400806	-0.308885	-0.347849	-0.28723	1.66768	-0.493026	-0.417724	-0.624797	-0.27463	-0.22125	-0.609093	-0.538836
NG_007465.1	CD55	NA	NA	NA	NA	NA	NA	NA	NA	NA	NA	NA	NA
NG_007473.2	XK	0.160703	0.109679	-1.16601	-1.87233	0.292072	-0.706097	-1.18162	1.00945	1.11547	1.38655	-0.620061	-1.07991
NG_007484.2	CDK4	-0.0703374	0.0579095	0.340954	0.405888	0.607134	0.730284	0.802004	0.582278	1.10635	1.13816	-0.109903	-0.025056
NG_007486.1	PRKAG2	0.566964	0.582418	-0.573506	-0.581697	-1.89679	1.11152	1.09419	-1.36815	1.2927	1.24284	-0.677774	-0.679284
NG_007488.1	RPS6KA3	NA	NA	NA	NA	NA	NA	NA	NA	NA	NA	NA	NA
NG_007491.2	FOXP2	0.192859	0.271195	-2.94862	-2.90346	0.706047	0.926115	0.981218	0.880295	0.45428	0.500283	0.68967	0.742519
NG_007504.2	SHH	NA	NA	NA	NA	NA	NA	NA	NA	NA	NA	NA	NA
NG_007529.2	FMR1	-0.128461	-0.0580073	-0.139014	-0.122455	0.509556	0.405248	0.450776	0.422403	1.18872	1.21202	0.330786	0.359502
NG_007530.1	SOS1	0.152739	0.205914	-1.46469	-1.53161	-0.0049802	0.453159	0.478149	-1.96528	1.27968	1.30232	1.03296	1.06465
NG_007551.2	FHIT	1.64752	1.89308	-1.41186	-1.26962	0.610783	0.439749	0.614779	0.287783	-0.660768	-0.54261	-1.0409	-0.8902
NG_007560.1	EXT2	1.6096	1.44858	-1.26472	-1.17345	0.110918	-0.194134	-0.192443	-1.36024	-0.622053	-0.605147	-1.42874	-1.31514
NG_007563.2	PHEX	0.365515	0.530587	-0.904942	-0.836301	-0.10989	0.393744	0.508988	1.12224	0.583916	0.667029	1.51681	1.64199
NG_007570.2	TMEM50B	NA	NA	NA	NA	NA	NA	NA	NA	NA	NA	NA	NA
NG_007664.1	PTCH1	NA	NA	NA	NA	NA	NA	NA	NA	NA	NA	NA	NA
NG_007665.2	ARHGAP31	NA	NA	NA	NA	NA	NA	NA	NA	NA	NA	NA	NA
NG_007729.1	FGFR1	NA	NA	NA	NA	NA	NA	NA	NA	NA	NA	NA	NA
NG_007873.3	BRAF	0.48881	0.554406	0.600188	0.628687	0.645899	0.957091	0.990449	-0.601302	1.3466	1.3541	0.813338	0.84198
NG_007938.1	CYP3A5	0.573212	NA	0.445859	NA	NA	0.784694	NA	-0.0010239	1.52168	NA	-0.888605	NA
NG_007947.2	SH3TC2	NA	-0.848262	NA	-1.63425	0.536866	NA	0.560306	NA	NA	0.0511811	NA	-0.454843
NG_007951.1	SLC12A6	0.631165	0.703464	-1.43103	-1.55996	0.739568	0.819802	0.888909	0.199279	0.866579	0.917335	0.673095	0.717546
NG_007961.1	CYP2U1	-0.385635	-0.291988	0.319393	0.364771	0.0279467	1.04824	1.1251	-0.73247	0.727224	0.765297	0.727974	0.781903
NG_007963.1	CYP46A1	1.07934	NA	0.0813416	NA	NA	1.71688	NA	-0.38987	0.310354	NA	0.930323	NA
NG_007968.1	CYP51A1	0.485275	0.535637	-1.28088	-1.25362	-1.19706	0.765577	0.79424	0.865183	-0.374777	-0.353054	-0.804323	-0.773588
NG_007977.1	FIG4	-0.953079	-0.856824	-1.21307	-1.14868	-1.0681	1.6305	1.57536	1.47141	-0.313685	-0.297594	1.58512	1.52655
NG_007980.1	ABCB7	0.386698	0.467894	-0.679308	-0.728307	-0.543873	0.883077	0.971387	0.848653	-0.459874	-0.500125	-0.575508	-0.610657
NG_007984.3	WNK1	NA	NA	NA	NA	NA	NA	NA	NA	NA	NA	NA	NA
NG_008014.1	ATP1A2	NA	NA	NA	NA	NA	NA	NA	NA	NA	NA	NA	NA
NG_008015.1	ATP1A3	1.44045	1.50241	-2.10713	-2.13953	0.822077	-0.279505	-0.279876	-0.728231	1.21345	1.22686	1.48872	1.51457
NG_008017.1	AUH	0.702907	0.79062	-1.54095	-1.49833	0.805191	1.24304	1.30703	-0.224026	-0.0877373	-0.0519409	0.951997	1.00038
NG_008020.1	RUNX2	NA	NA	NA	NA	NA	NA	NA	NA	NA	NA	NA	NA
NG_008034.1	COX10	-0.726485	-0.607775	0.787366	0.829528	0.885994	-0.0465085	0.0339071	1.2633	0.66069	0.699284	-1.02344	-0.926008
NG_008044.1	DGUOK	NA	NA	NA	NA	NA	NA	NA	NA	NA	NA	NA	NA
NG_008045.1	DLD	1.74228	1.82103	-0.361718	-0.33615	2.07891	-0.22679	-0.188536	0.972443	0.558469	0.58051	-1.01359	-0.986186
NG_008053.1	ACSL4	NA	NA	NA	NA	NA	NA	NA	NA	NA	NA	NA	NA
NG_008054.1	FGD1	-0.438575	-0.360958	-0.841028	-0.789713	-0.683858	-0.621121	-0.563916	1.30367	0.322296	0.317866	-0.362971	-0.326183
NG_008069.1	KIF1B	NA	NA	NA	NA	NA	NA	NA	NA	NA	NA	NA	NA
NG_008074.1	GLULP2	-1.84892	-1.78622	0.341355	0.343278	-0.292455	0.36446	0.389559	-2.05577	0.601019	0.590153	0.43531	0.443097
NG_008091.1	FBXW4	-0.186778	-0.063404	-2.01027	-1.93024	-1.04731	0.831598	0.909589	0.270353	0.791268	0.83877	0.155279	0.225016
NG_008092.1	L2HGDH	0.0176188	NA	-0.361585	NA	NA	0.222097	NA	-0.71575	1.41508	NA	0.601552	NA
NG_008112.1	SIL1	1.76571	2.04926	-1.07427	-0.964447	1.79226	0.78488	0.987566	0.774693	-0.724416	-0.614932	0.22531	0.390369
NG_008126.1	TTC8	-0.635505	-0.521637	1.6264	1.67657	-0.424395	-1.08506	-1.00113	1.37586	0.261701	0.317461	1.28932	1.34842
NG_008127.1	DNAI1	-0.214855	-0.150035	-0.982913	-0.945539	-0.48704	-0.271867	-0.226552	-1.36535	0.19312	0.218399	-0.158861	-0.122138
NG_008131.3	PANK2	NA	NA	NA	NA	NA	NA	NA	NA	NA	NA	NA	NA
NG_008134.2	KCNC3	-1.5521	-1.40314	1.27066	1.3549	0.594636	0.843381	0.96395	-0.220049	1.78402	1.85424	-0.211474	-0.117819
NG_008138.1	PRCC	1.28187	1.34582	-0.634216	-0.58339	1.44924	1.66416	1.70107	-0.675071	-0.31108	-0.270679	-1.10674	-1.04618
NG_008139.1	KCNQ4	-0.201846	-0.12623	-1.59407	-1.45469	-0.952737	0.622787	0.608559	0.249302	0.772557	0.723613	-1.55021	-1.40918
NG_008143.1	SCN2A	NA	NA	NA	NA	NA	NA	NA	NA	NA	NA	NA	NA
NG_008154.1	IRS2	0.136039	0.198083	0.475546	0.495994	0.375374	0.137656	0.171025	-1.59814	0.468345	0.480258	-1.46333	-1.45534
NG_008155.1	KIF5A	0.654828	0.698399	0.739762	0.759336	-1.27775	-1.10299	-1.07443	-1.28999	0.930518	0.945691	0.887468	0.909825
NG_008178.1	GK	NA	NA	NA	NA	NA	NA	NA	NA	NA	NA	NA	NA
NG_008179.2	GTF2I	0.495958	0.546637	-0.875857	-0.830953	1.15906	-1.42141	-1.34228	1.00454	-0.117684	-0.094554	-0.775138	-0.728447
NG_008182.1	HSD17B4	1.29374	1.35992	-1.07843	-1.06609	1.40415	1.33189	1.37845	-0.350912	1.60953	1.64383	1.34974	1.39092
NG_008197.1	MID1	NA	NA	NA	NA	NA	NA	NA	NA	NA	NA	NA	NA
NG_008198.2	ATXN3	-0.0887558	0.00263922	-3.43499	-3.40806	0.414537	-0.378558	-0.321387	-0.351243	1.40445	1.43768	0.789669	0.83685
NG_008200.1	NDUFS4	2.06894	2.20522	-1.32056	-1.30053	-0.444771	0.369485	0.442125	-0.148204	1.51404	1.58185	-0.0676892	-0.0164336
NG_008218.2	POLG	0.42499	0.461196	-2.0218	-1.99965	-1.19943	0.888855	0.904591	0.641927	1.19287	1.18933	-1.2503	-1.22949
NG_008227.1	ATXN7	0.121486	0.193953	-1.78784	-1.76649	-1.00839	-0.514665	-0.47787	1.22947	-0.772028	-0.776149	-0.504772	-0.489524
NG_008228.2	SCO1	NA	NA	NA	NA	NA	NA	NA	NA	NA	NA	NA	NA
NG_008232.1	SLC2A1	-0.79088	-0.72245	0.00362859	0.024629	-0.800295	-0.859814	-0.813145	-1.14409	2.26352	2.28846	-0.592181	-0.569742
NG_008238.1	ZNF41	0.669305	0.805508	-0.95833	NA	0.910256	0.184636	0.302207	0.74859	0.654336	NA	0.123966	NA
NG_008239.1	PABPN1	-0.0979449	0.00202492	0.63573	0.688534	-0.939216	0.626222	0.699902	-1.56106	1.0748	1.11892	0.215723	0.274081
NG_008245.1	PRPF3	0.285535	0.389298	0.693728	0.744123	-1.62046	0.563425	0.634235	-1.55329	1.20906	1.23853	0.376014	0.439432
NG_008246.1	GNE	-1.27288	-1.10092	1.46175	1.47245	0.304641	0.841664	0.8991	-0.0238881	-0.243577	-0.169655	0.910602	0.950614
NG_008247.1	LRPPRC	NA	NA	NA	NA	NA	NA	NA	NA	NA	NA	NA	NA
NG_008248.2	PRG4	0.499195	0.556109	1.0997	1.13449	-0.715412	0.698735	0.739956	1.07697	-0.877695	-0.876186	-0.227149	-0.207673
NG_008270.1	SEC63	0.703359	0.748798	-2.56694	-2.54248	-0.390521	0.706789	0.727728	0.505496	0.0280438	0.0324125	0.853217	0.865146
NG_008273.1	ANKH	2.10458	2.20333	-0.587081	-0.500929	-0.304658	-0.699091	-0.594466	-0.393993	-0.444557	-0.368588	-0.496077	-0.405718
NG_008278.1	UTP4	-0.296566	-0.238607	-0.97572	-0.945062	-0.143058	0.431668	0.472735	0.0285771	0.520737	0.542654	0.203541	0.235457
NG_008284.1	SMNDC1	-1.76871	-1.71679	0.387596	0.415089	0.48678	-1.135	-1.10119	1.25235	1.09004	1.11205	1.14813	1.18071
NG_008288.2	PAK3	0.305764	0.404933	-1.24908	-1.20202	0.705542	0.594812	0.662625	0.351926	0.491606	0.530632	0.463319	0.517535
NG_008289.1	PRKN	0.167523	0.356665	0.01013	0.126861	2.25235	-0.0188483	0.124829	-0.992425	1.41673	1.53392	-0.867753	-0.751255
NG_008292.1	IL1RAPL1	0.597721	0.863299	-2.08572	-1.8992	0.161635	0.364896	0.560435	0.00133655	1.73865	1.847	-0.0829328	0.087212
NG_008305.1	MAP2K1	1.73958	1.79407	-2.25189	-2.19172	-0.384335	1.96941	2.00038	-0.435658	0.380818	0.408921	1.02864	1.06035
NG_008315.1	TBX3	0.345574	0.484937	1.1805	1.26211	-1.00198	-0.967248	-0.853759	-0.488186	2.46003	2.52919	-0.652194	-0.562301
NG_008317.1	FGF14	0.560091	0.586358	-0.96155	-0.859783	0.582089	1.79707	1.63137	0.0402548	0.538905	0.461213	-0.483471	-0.423123
NG_008319.1	PC	NA	NA	NA	NA	NA	NA	NA	NA	NA	NA	NA	NA
NG_008338.2	CYP7B1	-0.0549123	-0.246743	-0.865035	-1.51854	-0.276166	1.2772	1.71756	-0.60017	-0.198162	-0.52402	0.891369	1.13067
NG_008340.1	PEX14	NA	NA	NA	NA	NA	NA	NA	NA	NA	NA	NA	NA
NG_008388.1	NEFM	0.762193	0.785159	-1.47117	-1.45607	0.965586	-1.57001	-1.55638	-1.80915	0.503579	0.500728	-1.61783	-1.5993
NG_008391.2	DLG4	NA	NA	NA	NA	NA	NA	NA	NA	NA	NA	NA	NA
NG_008397.1	FBXO11	0.486642	0.516166	-2.75477	-2.72716	0.506792	0.613416	0.615582	0.74597	0.0466535	0.0301183	0.808973	0.795014
NG_008408.1	YARS1	NA	NA	NA	NA	NA	NA	NA	NA	NA	NA	NA	NA
NG_008417.1	CEP290	-1.05898	-1.03454	-1.3925	-1.4106	-1.01522	0.979957	1.03236	0.770596	0.67809	0.703599	0.595516	0.62945
NG_008418.1	EPM2AIP1	-1.30291	-1.23842	-0.709082	-0.681679	-1.41617	0.987593	1.02792	0.475259	1.40001	1.41973	0.344353	0.375631
NG_008432.1	ABAT	NA	NA	NA	NA	NA	NA	NA	NA	NA	NA	NA	NA
NG_008433.1	DIAPH2	-0.122369	0.0635418	-0.814641	-0.750875	0.136976	1.05031	1.26186	-0.171468	-1.31426	-1.29449	-0.998294	-0.935776
NG_008434.1	GLI3	-1.10243	-1.1877	-1.7396	-1.9412	-1.32206	0.0408783	0.0299721	0.129074	1.77636	1.88717	0.395208	0.398964
NG_008437.1	SYN1	1.19067	1.51111	-0.064995	-0.206464	-0.542433	1.50562	1.91174	-0.349827	0.139104	0.059601	-0.140291	-0.302951
NG_008441.1	LXN	1.02686	1.10505	-0.368108	-0.34012	1.131	-0.0274059	0.0168825	1.27644	0.116734	0.145291	1.32081	1.37565
NG_008459.1	PEX3	-2.98946	-3.01747	0.196654	0.264243	-1.10171	-0.606182	-0.547368	0.601155	1.01952	1.11099	0.69751	0.803927
NG_008461.1	GNG3	NA	NA	NA	NA	NA	NA	NA	NA	NA	NA	NA	NA
NG_008475.1	CDKL5	-0.623907	-0.534058	-1.27372	-1.20794	0.115395	-0.649514	-0.580663	0.0646961	2.55527	2.56695	1.69168	1.72433
NG_008481.4	APC	0.361912	0.415028	0.430742	0.449737	0.488541	-0.280299	-0.250066	0.694512	0.989385	1.00278	0.631071	0.654124
NG_008483.2	CRB1	0.476585	0.559025	-3.21053	-3.14297	0.414159	0.86431	0.920738	-0.319138	-0.54436	-0.484051	1.10485	1.1513
NG_008489.1	SLC26A4	NA	NA	NA	NA	NA	NA	NA	NA	NA	NA	NA	NA
NG_008493.2	ESR1	0.36433	NA	-0.701696	NA	NA	1.76219	NA	-0.134113	-0.0260137	NA	0.0422551	NA
NG_008604.1	PKD2	NA	NA	NA	NA	NA	NA	NA	NA	NA	NA	NA	NA
NG_008606.1	BLOC1S1	0.398404	0.487266	0.470931	0.508984	0.440015	0.526915	0.582446	0.993915	-1.63381	-1.59775	0.351112	0.395637
NG_008626.2	FGD4	0.311264	0.522473	-0.546073	-0.406881	0.861119	0.28678	0.45677	-1.05052	1.30283	1.44989	-0.620611	-0.474551
NG_008638.1	OCRL	0.155357	0.260593	2.13608	2.12923	-0.196908	-0.468785	-0.369128	-0.801206	-0.127414	-0.0654385	-0.20063	-0.12263
NG_008643.1	AHI1	0.590618	0.664831	-1.95923	-1.8996	0.733276	0.503185	0.554232	0.307749	0.810261	0.838262	0.795652	0.835039
NG_008644.1	FIP1L1	1.21504	1.29342	-1.1283	-1.15616	-0.650327	1.60175	1.67173	-0.549674	-0.0752234	-0.0794811	1.64372	1.69814
NG_008648.1	PMS1	NA	NA	NA	NA	NA	NA	NA	NA	NA	NA	NA	NA
NG_008649.1	MLH3	NA	NA	NA	NA	NA	NA	NA	NA	NA	NA	NA	NA
NG_008659.3	RS1	-0.866202	NA	1.22554	NA	NA	-0.442947	NA	0.105322	0.197389	NA	-0.810952	NA
NG_008660.1	CAPN3	0.989554	1.26164	-0.599951	-0.991561	-1.29014	-0.543281	-0.893164	0.153676	0.558795	0.622998	0.373415	0.37463
NG_008675.1	COL6A2	-1.14479	-1.04824	-0.298334	-0.239402	-0.884043	1.42038	1.48073	1.17035	-0.0105091	0.0353598	1.22032	1.24533
NG_008679.1	PAX6	NA	NA	NA	NA	NA	NA	NA	NA	NA	NA	NA	NA
NG_008692.2	LMNA	-0.813916	-0.730207	-1.44754	-1.39502	-1.12102	0.873285	0.904581	0.440158	0.474246	0.490381	0.957132	0.978243
NG_008693.2	SGCD	NA	NA	NA	NA	NA	NA	NA	NA	NA	NA	NA	NA
NG_008695.1	ZMPSTE24	-0.70767	-0.643172	-0.507486	-0.484401	0.0705873	0.900451	0.938544	-1.22428	-0.540286	-0.524797	0.698409	0.725777
NG_008727.1	SLC1A2	0.424595	0.502919	-1.16997	-1.12463	0.478708	0.470685	0.525408	0.886382	2.04299	2.07051	0.956105	0.998609
NG_008734.1	TARDBP	0.668845	0.68638	0.6813	0.673656	-1.06381	-0.967048	-0.946399	0.809607	1.18447	1.16645	0.814926	0.808651
NG_008735.2	DCTN1	0.43841	0.506649	-1.80159	-1.77451	-1.82462	0.813274	0.865023	0.00827623	1.16576	1.19342	0.511968	0.547852
NG_008754.1	FKTN	0.436723	0.462691	0.787055	0.800537	-0.6612	1.31306	1.39027	0.875995	0.629333	0.621646	1.66957	1.76143
NG_008768.1	PCCA	0.470126	0.590017	-1.16075	-1.04549	1.61855	-0.639731	-0.518331	-1.15886	-0.942261	-0.841406	0.32019	0.4035
NG_008775.1	ALS2	NA	NA	NA	NA	NA	NA	NA	NA	NA	NA	NA	NA
NG_008776.1	CNTF	0.687019	0.751487	0.799529	0.831453	-1.50589	0.990202	1.03133	-1.54169	0.391474	0.42086	1.22554	1.25765
NG_008787.3	GDAP1	NA	NA	NA	NA	NA	NA	NA	NA	NA	NA	NA	NA
NG_008788.1	ELP1	NA	NA	NA	NA	NA	NA	NA	NA	NA	NA	NA	NA
NG_008799.2	RYR2	-0.953588	-0.810852	0.704925	0.743053	-0.884459	0.600465	0.662501	0.631575	-0.82262	-0.731024	0.751174	0.792366
NG_008801.2	CACNA1C	0.348679	0.434646	-1.69994	-1.65455	0.626487	0.77691	0.839449	1.10195	1.33573	1.3702	1.06488	1.1117
NG_008805.2	FBN1	NA	NA	NA	NA	NA	NA	NA	NA	NA	NA	NA	NA
NG_008807.2	DPYD	1.39225	1.45155	-0.118097	-0.125978	0.781413	1.36057	1.38719	-0.186891	-0.451157	-0.473388	-0.815971	-0.827935
NG_008835.1	CDH23	NA	NA	NA	NA	NA	NA	NA	NA	NA	NA	NA	NA
NG_008838.2	ATRX	1.27698	1.33585	-1.37634	-1.32184	0.801675	1.44852	1.48783	-0.726835	-0.650736	-0.606594	1.08471	1.12485
NG_008852.2	INSR	1.12749	1.20088	-1.6098	-1.52506	-0.486278	-0.757518	-0.677437	-1.14276	1.75594	1.77192	-1.12899	-1.04898
NG_008854.2	KCNQ3	-0.240782	NA	0.786165	NA	NA	-1.07492	NA	0.986498	1.66033	NA	-1.04552	NA
NG_008860.1	NBN	1.10494	1.19382	-1.6179	-1.54091	-0.781927	1.9623	2.01057	0.87331	-0.748577	-0.688919	-1.44027	-1.35987
NG_008863.2	PLP1	-1.1057	-1.2022	0.189987	0.185642	-1.26463	-1.14408	-1.25991	0.615827	0.802172	0.845724	0.556921	0.586977
NG_008865.1	ABCD3	NA	NA	NA	NA	NA	NA	NA	NA	NA	NA	NA	NA
NG_008867.1	ABCC8	NA	NA	NA	NA	NA	NA	NA	NA	NA	NA	NA	NA
NG_008868.1	VCL	NA	NA	NA	NA	NA	NA	NA	NA	NA	NA	NA	NA
NG_008873.1	ARHGEF6	-1.34861	-1.20208	-0.422276	-0.339034	0.090364	1.17904	1.28775	1.15941	2.11955	2.18176	1.49783	1.58204
NG_008875.1	GPHN	-0.37466	-0.326862	-2.02099	-2.0077	0.572962	0.997165	1.00258	-0.551711	-0.464092	-0.47166	1.08188	1.07619
NG_008878.1	CD2AP	0.0448429	0.132472	-2.69821	-2.65616	0.172446	0.468572	0.530336	0.325616	1.20881	1.24495	-1.33083	-1.28243
NG_008881.1	NLGN4X	1.04416	1.11185	1.09203	1.13149	1.06497	1.31506	1.36529	-0.679342	-0.159722	-0.117886	0.133083	0.181097
NG_008882.1	MCCC2	-0.676968	-0.618121	-1.4612	-1.44738	-0.370178	0.562795	0.597781	-0.948924	2.35593	2.37118	-1.00838	-0.988214
NG_008885.1	SPG11	NA	NA	NA	NA	NA	NA	NA	NA	NA	NA	NA	NA
NG_008886.1	PHF6	0.882682	1.21527	0.230944	0.206045	-0.949649	0.555782	0.702929	1.31406	0.48358	0.571008	0.370384	0.417874
NG_008893.2	SGCE	NA	NA	NA	NA	NA	NA	NA	NA	NA	NA	NA	NA
NG_008899.1	SGCZ	1.27701	1.45686	-1.33866	-1.26995	0.759351	0.235199	0.349756	1.23603	1.72296	1.79715	-0.39789	-0.311943
NG_008916.1	KCNH2	0.606318	0.649135	-2.19194	-2.19452	-0.389543	0.961975	0.991527	0.873448	0.104106	0.122104	0.815514	0.839871
NG_008922.1	MOGS	NA	NA	NA	NA	NA	NA	NA	NA	NA	NA	NA	NA
NG_008923.1	DPM1	0.457968	0.512286	-0.67418	-0.74262	0.554538	-0.853352	-0.904886	-1.58532	0.537091	0.529124	-1.21768	-1.3112
NG_008925.2	ALG6	NA	NA	NA	NA	NA	NA	NA	NA	NA	NA	NA	NA
NG_008926.1	ALG8	NA	NA	NA	NA	NA	NA	NA	NA	NA	NA	NA	NA
NG_008931.1	VPS13A	NA	NA	NA	NA	NA	NA	NA	NA	NA	NA	NA	NA
NG_008935.1	KCNQ1	NA	NA	NA	NA	NA	NA	NA	NA	NA	NA	NA	NA
NG_008951.1	ATR	NA	NA	NA	NA	NA	NA	NA	NA	NA	NA	NA	NA
NG_008959.1	MTR	NA	NA	NA	NA	NA	NA	NA	NA	NA	NA	NA	NA
NG_008960.1	OPHN1	NA	NA	NA	NA	NA	NA	NA	NA	NA	NA	NA	NA
NG_008966.1	TUBA1A	NA	NA	NA	NA	NA	NA	NA	NA	NA	NA	NA	NA
NG_008968.1	AGPS	0.502259	0.63261	-0.728659	-0.667744	0.786687	-0.279272	-0.192517	-0.815841	0.234084	0.300907	-1.06671	-1.0053
NG_008972.1	PDSS1	-0.214242	-0.150485	1.2864	1.31563	-0.410615	-0.29537	-0.250805	0.896198	1.16857	1.19249	1.11732	1.15058
NG_008978.1	NDUFAF2	2.12277	2.26851	-0.799193	-0.740162	-0.53761	1.78091	1.89061	2.08526	0.190786	0.252627	-0.318031	-0.247165
NG_008980.1	SPRED1	0.533021	0.74337	0.4923	0.643535	0.781971	0.732653	1.01824	0.776901	0.407914	0.507697	-0.559442	-0.945908
NG_008982.1	SLC22A5	0.440616	0.388201	-0.241467	-0.336871	-0.032337	0.675011	0.609681	0.72889	1.23529	1.16045	0.856121	0.783372
NG_008991.2	RPGRIP1L	-0.0734608	0.0271828	-2.29513	-2.14976	-0.14786	0.431484	0.484964	0.861436	1.27442	1.27642	0.944855	0.971398
NG_008992.2	SPG21	1.26861	1.34265	-1.25439	-1.21516	-0.532031	-0.277666	-0.229868	-1.15518	-0.0939248	-0.0662875	-0.539752	-0.498679
NG_008994.1	CCDC50	-1.06974	NA	0.0476794	NA	NA	0.65748	NA	0.640165	0.0049372	NA	0.796988	NA
NG_009000.1	PKP2	0.19862	0.249001	-2.51916	-2.51503	-0.349728	0.472395	0.504017	0.976739	0.17173	0.190514	0.640019	0.664956
NG_009005.1	GLB1	NA	NA	NA	NA	NA	NA	NA	NA	NA	NA	NA	NA
NG_009006.2	ANK2	-1.30614	-1.32721	-0.201105	-0.223761	-0.34899	1.23347	1.39435	0.181165	1.21805	1.29119	0.86089	0.938609
NG_009007.1	GAN	-0.729921	-0.395612	-2.2588	-1.83965	0.39174	0.28552	0.447428	-0.454771	1.08394	1.09691	1.90078	1.84772
NG_009009.1	RB1	-0.294672	-0.55839	0.265595	0.229722	-0.312367	-0.134742	-0.349125	-0.188016	0.386907	0.40097	1.49916	2.06505
NG_009018.1	EVI2A	NA	NA	NA	NA	NA	NA	NA	NA	NA	NA	NA	NA
NG_009028.1	ATL1	0.367914	0.446824	-0.968727	-1.58866	0.386913	0.56609	0.720414	0.750698	0.581055	0.72275	0.584157	0.738324
NG_009057.1	NF2	NA	NA	NA	NA	NA	NA	NA	NA	NA	NA	NA	NA
NG_009062.1	NR3C1	-0.177075	-0.0927391	-1.33723	-1.28451	1.14951	-0.0917987	-0.034164	2.12435	0.255627	0.286996	-0.058345	-0.0117352
NG_009072.1	VWF	NA	NA	NA	NA	NA	NA	NA	NA	NA	NA	NA	NA
NG_009080.1	SOX2	-1.02092	-1.01931	-1.59814	-1.66048	1.51758	-0.53362	-0.54122	1.29623	0.430652	0.441397	1.10974	1.16303
NG_009090.2	GAST	NA	NA	NA	NA	NA	NA	NA	NA	NA	NA	NA	NA
NG_009099.1	GNAT2	NA	NA	NA	NA	NA	NA	NA	NA	NA	NA	NA	NA
NG_009109.1	MKKS	0.685752	0.789734	-1.55313	-1.61898	-0.780611	-0.55767	-0.567721	-0.966934	1.47847	1.58212	0.827108	0.902577
NG_009111.1	BBS7	-0.464289	-0.432189	1.2355	1.18054	-0.485112	-0.965653	-0.949219	-1.34501	1.99224	1.90806	-0.607065	-0.605491
NG_009114.1	PRKCG	NA	NA	NA	NA	NA	NA	NA	NA	NA	NA	NA	NA
NG_009118.1	PRPF8	0.509485	0.570953	-0.569992	-0.519889	0.00436406	2.24026	2.25015	1.79392	0.239609	0.272707	-0.622092	-0.567816
NG_009159.1	THRB	1.06516	1.14105	-1.0784	-1.0191	0.0263955	-0.380424	-0.311738	-0.549433	2.19973	2.22905	1.65383	1.69879
NG_009160.1	TSPAN7	-1.00829	-0.91142	-0.955248	-0.890681	-0.920952	-0.896191	-0.818591	-1.08753	1.15656	1.17885	1.17858	1.20852
NG_009190.1	TMEM67	NA	NA	NA	NA	NA	NA	NA	NA	NA	NA	NA	NA
NG_009192.1	PPT1	-1.28769	-1.24267	0.876366	0.874167	0.569837	0.678103	0.687679	0.572075	-1.24313	-1.2296	0.62211	0.625425
NG_009194.1	IMPDH1	-0.110338	-0.226176	-0.904215	-1.41673	0.782432	0.566146	0.732604	0.411157	0.885314	1.17031	0.3646	0.42748
NG_009201.1	DTNA	0.45103	0.531342	-1.20123	-1.10318	0.654863	0.797671	0.842592	0.56883	1.07779	1.09383	-0.938352	-0.844588
NG_009205.2	POMGNT1	NA	NA	NA	NA	NA	NA	NA	NA	NA	NA	NA	NA
NG_009218.1	DLX1	-1.61525	-1.58934	-1.51232	-1.51931	0.275559	0.730597	0.752202	0.358036	1.19466	1.19054	0.249977	0.254718
NG_009222.1	ELK1	-0.196353	-0.141849	0.977948	1.00733	-0.0380543	0.981209	1.02068	0.444672	0.139764	0.162794	0.645271	0.677299
NG_009224.2	GRIK2	-0.612033	-0.564065	-0.739875	-0.770938	-0.379807	0.880422	0.924778	-0.317642	2.08013	2.10785	0.676196	0.69098
NG_009231.1	HIRA	0.305597	0.374631	0.515298	0.549039	-0.389578	-0.324081	-0.284334	0.849785	1.5447	1.58023	0.886838	0.927853
NG_009233.1	YWHAE	NA	NA	NA	NA	NA	NA	NA	NA	NA	NA	NA	NA
NG_009234.1	BTRC	0.277686	0.383001	-1.11135	-1.03831	0.769777	1.94026	1.99443	1.27743	-0.365326	-0.308014	1.34951	1.40448
NG_009238.3	L3MBTL1	NA	NA	NA	NA	NA	NA	NA	NA	NA	NA	NA	NA
NG_009239.1	DYM	0.61075	0.71093	-0.183115	-0.118037	0.103736	0.309587	0.384764	-0.224023	2.56478	2.56545	-0.319599	-0.246267
NG_009240.1	LMBR1	-0.0444911	0.071971	-0.956785	-0.950533	0.201165	-0.0603675	0.0233198	-0.988101	-0.714178	-0.701082	-1.82702	-1.87326
NG_009241.1	UPF3B	0.375051	0.449698	-1.61299	-1.55059	0.853582	-1.43089	-1.35942	0.619381	1.16084	1.18699	0.54012	0.58298
NG_009242.1	ZIC4	-0.472595	-0.357161	-1.0188	-0.873128	0.150457	-0.419973	-0.344878	0.380011	1.14408	0.955269	0.413838	0.350291
NG_009243.2	DISP1	0.388444	0.449712	-0.447737	-0.876538	-0.219984	-0.70224	-1.24832	-0.244979	1.10816	1.48498	-0.905226	-1.56793
NG_009244.1	BCR	NA	NA	NA	NA	NA	NA	NA	NA	NA	NA	NA	NA
NG_009245.1	BMPR1B	-0.329002	-0.178801	1.0149	1.06532	0.0179924	1.29383	1.35502	-0.636831	-1.16977	-1.04161	-1.61125	-1.45157
NG_009248.1	EEF1B2	-1.29536	-1.30979	1.08133	1.0697	0.580379	0.916102	0.92355	0.9394	-0.64474	-0.691979	0.533528	0.518119
NG_009263.1	NNAT	0.418371	NA	1.32652	NA	NA	0.377609	NA	0.481681	0.418493	NA	0.778723	NA
NG_009269.1	NSD2	-0.536015	-0.387152	-1.41591	-1.29981	0.472598	0.569293	0.655677	0.350018	1.59989	1.62887	0.665484	0.734881
NG_009274.1	AP1S2	0.403028	0.368749	-0.62673	-0.646575	0.531771	1.19521	1.09103	1.2818	-0.927495	-0.937969	1.28466	1.16063
NG_009275.1	FBXW11	NA	NA	NA	NA	NA	NA	NA	NA	NA	NA	NA	NA
NG_009289.1	ERCC8	0.8747	0.939874	-1.65124	-1.57486	1.09205	1.11343	1.14663	0.10558	0.605949	0.628979	1.30383	1.32595
NG_009290.1	GABRG2	0.140679	0.230452	1.01839	1.04182	0.477032	0.847286	0.891106	-1.32893	-0.671554	-0.598927	0.665483	0.704963
NG_009296.1	CD46	0.6427	NA	0.542125	NA	NA	1.0852	NA	0.692075	-0.419188	NA	0.705303	NA
NG_009298.1	TRIM37	NA	NA	NA	NA	NA	NA	NA	NA	NA	NA	NA	NA
NG_009305.1	EIF2B4	0.942548	0.977051	-1.32355	-1.29415	0.53855	0.81289	0.830567	1.24282	-0.628531	-0.611787	1.20294	1.20893
NG_009306.1	BBS9	-0.0794167	0.0336222	2.7768	2.81224	1.47748	1.00278	1.07383	-0.588873	0.15078	0.205541	-0.160295	-0.0880936
NG_009309.1	DTNBP1	NA	NA	NA	NA	NA	NA	NA	NA	NA	NA	NA	NA
NG_009358.2	CACNA2D1	0.114988	0.228219	-0.770349	-0.701284	0.27868	-0.407039	-0.320662	1.99258	0.645007	0.702011	-0.983189	-0.908181
NG_009361.1	BCL2	0.276175	NA	1.40508	NA	NA	-2.62151	NA	-0.369332	0.289701	NA	-0.172392	NA
NG_009363.1	BMPR2	1.76478	1.87957	-0.702182	-0.550279	-0.0924471	-0.376701	-0.232238	1.74242	0.410455	0.520534	1.77503	1.85493
NG_009365.1	DDB2	1.3688	NA	-1.29706	NA	NA	-0.236994	NA	0.793777	0.313724	NA	0.370395	NA
NG_009366.1	DYRK1A	0.509071	0.578501	0.540758	0.572393	-0.599908	0.87207	0.915293	0.790756	1.09164	1.1077	0.781118	0.812747
NG_009367.1	FOXG1	0.374231	NA	0.53358	NA	NA	-1.3952	NA	-1.80798	0.177053	NA	-1.5762	NA
NG_009370.1	GPC5	0.895799	1.01621	-0.68604	-0.618433	0.781073	0.138399	0.213377	0.388778	-0.512224	-0.47073	0.29451	0.333782
NG_009377.2	GRIA3	-1.75924	-1.5873	-1.15966	-1.08125	-1.17358	0.41666	0.50899	-1.19332	0.363007	0.405557	0.864021	0.926815
NG_009378.1	HTT	1.03431	1.09414	-1.3263	-1.25339	-0.532865	1.30963	1.34569	-0.802647	1.75442	1.76562	-0.590062	-0.527076
NG_009388.1	CUL4B	NA	NA	NA	NA	NA	NA	NA	NA	NA	NA	NA	NA
NG_009416.2	BBS4	0.605929	0.68365	-2.00854	-1.91734	-1.07852	1.47036	1.51786	-0.380042	1.45424	1.47903	0.973465	1.01616
NG_009445.1	ALK	-0.632601	-0.517637	-2.11071	-2.09129	0.251557	0.67117	0.778678	0.156645	1.71299	1.79966	-1.54952	-1.51033
NG_009492.1	IGF1R	1.64522	1.73427	-0.016555	0.0799913	0.30613	0.141223	0.252527	1.74648	0.680958	0.742506	-1.13179	-0.989289
NG_009552.1	HGSNAT	NA	NA	NA	NA	NA	NA	NA	NA	NA	NA	NA	NA
NG_009553.1	RPGR	-1.21383	-1.1304	-1.76028	-1.72158	0.638844	0.966863	1.03686	0.955865	0.874363	0.91928	0.871302	0.929354
NG_009763.2	HPS4	NA	NA	NA	NA	NA	NA	NA	NA	NA	NA	NA	NA
NG_009775.1	BCKDHB	NA	NA	NA	NA	NA	NA	NA	NA	NA	NA	NA	NA
NG_009796.1	GLMN	NA	NA	NA	NA	NA	NA	NA	NA	NA	NA	NA	NA
NG_009799.1	PAFAH1B1	NA	NA	NA	NA	NA	NA	NA	NA	NA	NA	NA	NA
NG_009817.1	EP300	NA	NA	NA	NA	NA	NA	NA	NA	NA	NA	NA	NA
NG_009821.1	NSD1	0.645433	0.668619	0.944192	0.937204	0.750952	-0.211649	-0.186134	1.04613	1.64062	1.6126	-1.17843	-1.13467
NG_009830.1	ATM	-1.03024	-0.943854	-0.744901	-0.690244	0.718849	0.937092	0.98858	-1.08805	1.47409	1.49217	1.28467	1.31566
NG_009874.2	CHM	NA	NA	NA	NA	NA	NA	NA	NA	NA	NA	NA	NA
NG_009876.1	TAPBP	-0.61975	-0.608041	1.14137	1.14147	0.647672	0.644418	0.65668	0.512975	1.36501	1.36037	0.482978	0.475416
NG_009887.1	MYO5A	0.611127	0.58775	-0.0497735	-0.0826279	-1.06167	-1.08194	-1.06441	-1.31663	1.34036	1.25061	1.00535	0.937936
NG_009929.2	LARGE1	-0.516902	-0.406188	1.62281	1.66014	-0.418574	1.45019	1.50491	-0.161269	-0.906567	-0.836644	1.53657	1.57992
NG_009934.1	MYO6	NA	NA	NA	NA	NA	NA	NA	NA	NA	NA	NA	NA
NG_011403.1	F8	-0.426415	-0.308899	-1.10395	-1.02264	-1.70115	-0.506173	-0.414992	0.653076	-0.910378	-0.838594	1.57274	1.63613
NG_011434.1	ADCY9	NA	NA	NA	NA	NA	NA	NA	NA	NA	NA	NA	NA
NG_011443.1	ETV6	-0.634908	-0.508081	-0.213322	-0.136764	1.04885	1.6058	1.69945	-0.842737	2.4072	2.47464	0.569292	0.65165
NG_011445.2	FER	3.10501	3.24123	-0.653335	-0.557307	1.82397	-0.0546687	0.0612093	-0.841244	-0.955555	-0.869553	-1.24005	-1.13823
NG_011447.1	GRIK3	0.0464584	-0.0862547	0.680505	0.493725	-0.450024	-0.756924	-0.903597	-0.897905	0.112919	-0.0737473	1.38916	1.19693
NG_011449.1	HMGCR	NA	NA	NA	NA	NA	NA	NA	NA	NA	NA	NA	NA
NG_011463.1	LAMC1	0.391995	0.456714	-1.3777	-1.36276	1.19385	-0.841248	-0.79876	-0.953919	0.495802	0.516023	-1.04969	-1.02741
NG_011467.1	MEIS1	-0.389381	-0.260566	-1.01115	-0.92055	0.0131133	1.75475	1.81122	1.33227	1.11778	1.16266	0.508357	0.578271
NG_011471.2	P2RX7	NA	NA	NA	NA	NA	NA	NA	NA	NA	NA	NA	NA
NG_011482.1	AGRP	NA	NA	NA	NA	NA	NA	NA	NA	NA	NA	NA	NA
NG_011484.1	DLG5	0.59697	0.702267	0.189736	0.264991	1.49552	0.40832	0.494756	0.312998	0.450022	0.521091	1.69262	1.77705
NG_011487.1	MAGI2	0.206381	0.334138	-1.96542	-1.89883	0.335039	0.732656	0.815093	0.0771404	-0.558201	-0.51166	0.512818	0.574871
NG_011490.1	ARFGEF2	-0.0733835	-0.0461813	0.257514	0.237134	-0.0876741	0.591209	0.595383	0.370422	1.33842	1.32333	0.648402	0.639473
NG_011493.1	AKAP10	NA	NA	NA	NA	NA	NA	NA	NA	NA	NA	NA	NA
NG_011499.1	JAZF1	1.28491	1.3575	-1.61889	-1.55393	1.41282	-0.865999	-0.795044	-0.998188	1.29747	1.32884	-0.549142	-0.490098
NG_011513.1	ABCB1	0.668982	0.817856	0.782856	0.87799	-0.278392	0.650535	0.764359	1.70412	2.25856	2.35592	-1.2906	-1.20658
NG_011517.2	LRP8	0.240768	0.252358	0.240179	0.211198	-1.83896	0.628472	0.667882	0.562683	1.02734	1.09739	0.576621	0.59778
NG_011519.1	UBQLN1	0.620723	0.651121	0.931025	0.93392	-1.62473	1.07227	1.0947	0.746302	-0.49192	-0.532947	1.13723	1.14952
NG_011520.1	ACSS2	0.317013	0.358937	-1.78588	-1.79496	-0.232754	0.494258	0.514543	-1.26757	1.60729	1.6075	0.807081	0.814896
NG_011521.1	TSEN2	NA	NA	NA	NA	NA	NA	NA	NA	NA	NA	NA	NA
NG_011525.1	PACRG	0.365461	0.473265	-1.2225	-1.19008	0.133965	0.504984	0.588756	0.209428	0.261413	0.314514	0.934233	1.01328
NG_011531.1	GFM2	-1.04475	-0.931887	-1.28599	-1.19738	0.651916	-0.709347	-0.624932	0.812657	1.37566	1.39608	0.854232	0.89772
NG_011538.1	KCNMB1	-0.558389	-0.388256	0.0227553	0.123653	0.0968107	0.89722	1.02138	1.17746	-0.69967	-0.607498	-0.177865	-0.0681122
NG_011548.1	GABRA1	-0.0250826	0.0215772	-3.20047	-3.18556	0.171364	0.570379	0.59189	0.0596388	0.872916	0.872026	0.34335	0.355038
NG_011553.2	NHS	0.326905	0.506526	-1.8571	-1.73176	-0.0912622	1.0444	1.18679	1.07805	0.896028	0.991346	1.42027	1.5314
NG_011569.1	CACNA1A	0.956097	1.05349	-0.638048	-0.453582	-0.366675	0.27839	0.393034	-0.0633828	2.02487	1.90775	0.0360771	0.157121
NG_011570.1	PPP2R2B	1.13702	1.23639	-0.613585	-0.55384	-0.264504	1.61849	1.68328	-0.658711	0.00221892	0.0500365	-0.628991	-0.563351
NG_011571.1	ATXN1	-0.701093	-0.61545	-1.35914	-1.33006	0.364713	-0.613636	-0.567894	0.248314	1.96678	1.94663	0.619901	0.633639
NG_011572.2	ATXN2	NA	NA	NA	NA	NA	NA	NA	NA	NA	NA	NA	NA
NG_011594.1	DIAPH1	0.34812	0.425456	1.30032	1.83138	0.0456053	0.0710997	-0.0273718	-0.543953	0.192401	0.131141	-0.517218	-0.937984
NG_011605.1	OPA1	-0.0644961	-0.0298712	-0.910045	-0.886955	-0.425703	1.30895	1.28556	1.42664	-0.545806	-0.53869	-0.529007	-0.512008
NG_011612.1	USF1	NA	NA	NA	NA	NA	NA	NA	NA	NA	NA	NA	NA
NG_011622.1	SNTA1	NA	NA	NA	NA	NA	NA	NA	NA	NA	NA	NA	NA
NG_011623.1	AKAP9	0.842464	0.912024	-2.09291	-2.07988	0.0448205	0.748723	0.795723	-1.06076	0.925847	0.957656	0.699772	0.740342
NG_011633.1	TECTA	0.707247	0.779941	-1.08546	-1.05166	-1.39995	0.481336	0.530077	-1.21596	-0.909488	-0.882631	1.11146	1.15334
NG_011650.1	RASA1	NA	NA	NA	NA	NA	NA	NA	NA	NA	NA	NA	NA
NG_011652.1	PCDH11Y	-0.0862324	NA	-0.252821	NA	NA	0.242003	NA	0.351674	1.12862	NA	0.38318	NA
NG_011674.1	GATM	-0.586922	-0.542688	-0.0989962	-0.0894623	-0.359583	1.58731	1.62631	-0.295586	-0.525086	-0.526726	1.75618	1.78773
NG_011678.1	PPM1B	0.29629	NA	-1.2888	NA	NA	0.657406	NA	0.43782	0.818012	NA	0.341902	NA
NG_011679.1	SUMO1	0.337337	0.36748	-1.48672	-1.44894	0.734368	0.624302	0.627099	-0.931216	-0.877619	-0.857628	-1.28376	-1.24634
NG_011690.1	ALMS1	1.34751	1.47687	1.50587	1.55524	1.22019	-0.374926	-0.238071	1.26719	1.36157	1.40396	-0.191843	-0.0749357
NG_011698.1	WWOX	NA	NA	NA	NA	NA	NA	NA	NA	NA	NA	NA	NA
NG_011702.1	SLC25A3	0.539617	0.591688	-1.0859	-1.07658	0.716821	-1.27743	-1.25642	0.865685	-0.847326	-0.84017	0.825355	0.858706
NG_011707.1	FANCC	NA	NA	NA	NA	NA	NA	NA	NA	NA	NA	NA	NA
NG_011709.1	LRRK2	-0.250974	-0.122879	-1.42093	-1.30484	-0.0659243	1.38912	1.43071	-0.170942	-0.510937	-0.431818	-0.742418	-0.641935
NG_011715.1	TGFB3	0.906402	1.01664	-0.771014	-0.703667	-1.14961	1.52858	1.60798	0.577239	0.688369	0.741704	-0.636332	-0.563989
NG_011716.2	TCF4	NA	NA	NA	NA	NA	NA	NA	NA	NA	NA	NA	NA
NG_011723.1	ZFPM2	-0.195558	-0.0729412	-0.969417	-0.888724	0.886719	1.22377	1.2991	-0.761893	-1.78705	-1.70915	0.813722	0.886986
NG_011728.2	SYN2	NA	NA	NA	NA	NA	NA	NA	NA	NA	NA	NA	NA
NG_011729.1	ROBO1	1.07487	1.15081	-0.474053	-0.440661	0.349882	0.448161	0.494887	-0.6004	1.60931	1.61611	0.201739	0.2356
NG_011733.1	SEMA7A	-1.34891	-1.30015	-1.53775	-1.50506	0.722028	0.739928	0.748878	0.577643	1.67541	1.64605	0.554073	0.553233
NG_011756.1	SYNE2	-0.174923	-0.101082	-2.67216	-2.66988	-0.0283002	-0.305241	-0.250877	0.0114251	0.649006	0.691374	1.1445	1.19753
NG_011781.1	SLC25A12	0.484655	0.580595	0.700472	0.849183	-0.907363	-0.584966	-0.973692	-0.499503	1.25875	1.63689	0.742053	0.912382
NG_011782.1	GLIS3-AS1	NA	NA	NA	NA	NA	NA	NA	NA	NA	NA	NA	NA
NG_011787.1	NFIA	-0.459423	-0.344304	-1.00062	-0.93229	0.296553	-0.90523	-0.818616	-1.25408	1.48706	1.5489	0.577509	0.652386
NG_011791.1	ACVR2B	NA	NA	NA	NA	NA	NA	NA	NA	NA	NA	NA	NA
NG_011794.1	BDNF	NA	NA	NA	NA	NA	NA	NA	NA	NA	NA	NA	NA
NG_011800.2	CP	0.373902	0.436645	1.18568	1.54606	0.959666	0.803764	1.02127	0.211832	0.896758	1.12628	-0.136902	-0.331904
NG_011802.1	DRD1	-0.988108	-1.49264	-0.246033	-0.550343	-1.82624	0.0374225	-0.0872749	0.357163	1.8667	2.47929	0.346559	0.324671
NG_011805.1	ERBB4	0.0627803	0.193423	-1.06049	-1.00622	0.262967	0.475924	0.562651	0.0494197	-1.05028	-1.00884	-1.01441	-0.951644
NG_011809.1	GABRA4	NA	NA	NA	NA	NA	NA	NA	NA	NA	NA	NA	NA
NG_011810.1	GBE1	0.41214	0.402204	1.61528	1.43664	-1.50624	-0.712546	-0.637841	-0.708657	0.190852	0.147133	1.30474	1.16295
NG_011811.2	GGCX	-0.67543	-0.643618	0.833068	0.80913	-0.728925	1.08882	1.06908	0.460334	0.627584	0.60087	0.00153297	-0.006501
NG_011812.1	GRIN2A	-0.18501	-0.0753783	-2.09851	NA	0.022403	-0.455858	-0.377299	-0.390771	1.67895	NA	-0.747498	NA
NG_011815.1	KCNA1	-0.412092	-0.369031	0.49568	0.489254	-0.372991	0.0765755	0.0879065	0.199812	0.916396	0.901166	-0.112959	-0.11402
NG_011817.1	LIFR	NA	-0.234254	NA	-1.23953	0.990783	NA	0.459495	NA	NA	1.60783	NA	1.1933
NG_011823.1	OXCT1	NA	NA	NA	NA	NA	NA	NA	NA	NA	NA	NA	NA
NG_011831.2	STX16	0.3186	NA	-1.60001	NA	NA	0.106829	NA	0.647621	1.37362	NA	-0.937509	NA
NG_011832.1	LGI1	0.5088	0.573071	-2.68538	-2.6074	0.261164	-0.874124	-0.818009	-0.432193	0.839264	0.841967	0.459308	0.482749
NG_011836.1	ZFYVE26	0.631574	0.71415	0.0964654	0.150785	-0.78533	0.843028	0.896052	1.05802	0.910046	0.939337	1.3202	1.35251
NG_011847.1	KCNJ13	NA	NA	NA	NA	NA	NA	NA	NA	NA	NA	NA	NA
NG_011852.2	DBT	NA	NA	NA	NA	NA	NA	NA	NA	NA	NA	NA	NA
NG_011854.2	GALNT2	1.92847	2.0134	-1.37106	-1.2725	-0.280314	-0.189898	-0.0950272	-0.12458	0.617572	0.672998	2.51465	2.55017
NG_011875.1	GRID1	0.979299	1.12538	-0.643362	-0.530734	1.39675	-0.898061	-0.752162	-1.99632	-0.657236	-0.557403	0.199174	0.30141
NG_011876.1	PCDH9	0.757099	1.2172	0.232193	0.236592	-1.02547	0.00970365	-0.0709975	-0.24337	1.5326	2.32879	0.0185553	-0.0947974
NG_011877.1	RELN	NA	NA	NA	NA	NA	NA	NA	NA	NA	NA	NA	NA
NG_011878.1	NRXN1	-0.874155	-0.737362	1.26543	1.31423	1.03336	0.482362	0.565699	-0.776925	1.57824	1.61189	-1.33804	-1.24071
NG_011880.1	GPC6	0.489417	0.660679	-0.473954	-0.379499	-0.472094	0.263499	0.390581	-0.854372	2.40244	2.53636	-1.0618	-0.970346
NG_011881.1	NPM1P3	NA	NA	NA	NA	NA	NA	NA	NA	NA	NA	NA	NA
NG_011901.1	ACTR1A	0.334068	0.32423	-1.16761	-1.44033	0.84684	0.79419	0.844682	-0.956628	1.01308	1.09212	-0.932203	-1.16398
NG_011906.1	SCN1A	0.968493	1.05615	-1.69037	-1.66249	-1.17888	0.570192	0.627464	0.578142	1.20608	1.23914	0.310788	0.352366
NG_011937.1	AP1G2	0.447943	0.533813	-1.26733	-1.27315	0.243998	0.340862	0.397099	0.0738336	0.914138	0.965039	0.522894	0.575106
NG_011958.1	NOG	-0.750841	NA	-0.74709	NA	NA	0.367584	NA	-0.531382	1.20626	NA	-0.268263	NA
NG_011959.1	CDH2	0.129012	0.203631	0.460061	0.483601	-0.822492	0.330403	0.369703	0.275863	-0.860659	-0.847784	-0.203395	-0.173755
NG_011964.1	ARG2	NA	NA	NA	NA	NA	NA	NA	NA	NA	NA	NA	NA
NG_011965.1	MAP3K5	0.689865	0.730052	-1.43532	-1.37244	-0.731214	-1.04068	-0.970094	0.0898586	1.52594	1.50231	-0.233188	-0.198164
NG_011966.2	MAP3K7	-0.25101	-0.553506	0.317383	0.273247	-1.11153	-0.287951	-0.641352	-0.120322	0.816231	1.03786	-0.0181637	-0.241443
NG_011970.1	CSNK2A1	-0.584383	-0.53437	-3.00056	-2.96226	-2.15445	0.494936	0.511412	0.167194	0.730621	0.718712	0.351764	0.356675
NG_011987.2	ABR	NA	NA	NA	NA	NA	NA	NA	NA	NA	NA	NA	NA
NG_011988.1	GPM6B	NA	NA	NA	NA	NA	NA	NA	NA	NA	NA	NA	NA
NG_011990.1	SMAD3	0.244923	0.280631	0.0626598	0.0588853	-1.60058	0.625579	0.633571	-1.34288	1.53624	1.50574	0.74073	0.732678
NG_011993.1	TOX	0.882404	0.960387	1.40979	1.412	-0.2789	0.172117	0.223046	0.399926	0.521772	0.528777	0.449676	0.478229
NG_012005.1	NRG1	NA	NA	NA	NA	NA	NA	NA	NA	NA	NA	NA	NA
NG_012011.2	SSPN	-0.583345	-0.456342	-0.376231	-0.36414	-0.974761	-1.2396	-1.19516	0.670539	1.92792	1.94518	0.214139	0.247179
NG_012037.1	ADD1	NA	NA	NA	NA	NA	NA	NA	NA	NA	NA	NA	NA
NG_012038.2	AKT2	-0.389141	-0.673551	-1.9139	-2.93332	0.534124	0.633564	0.782377	0.47507	0.431892	0.475421	-0.0303669	-0.187515
NG_012042.1	BIN1	NA	NA	NA	NA	NA	NA	NA	NA	NA	NA	NA	NA
NG_012046.1	ATP2B2	NA	NA	NA	NA	NA	NA	NA	NA	NA	NA	NA	NA
NG_012058.2	CNTN1	0.731354	0.737348	0.983215	0.947679	-0.968428	-1.12986	-1.122	0.829191	-0.272209	-0.303494	1.29206	1.25856
NG_012061.1	CYLD	-0.484126	-0.740189	0.969149	1.15808	-0.739911	-0.915173	-1.33437	1.03009	1.36752	1.68251	-0.171515	-0.357713
NG_012077.1	HK1	NA	NA	NA	NA	NA	NA	NA	NA	NA	NA	NA	NA
NG_012082.2	HTR2C	-0.574624	-0.54114	-0.961584	-0.953639	0.147209	-0.215881	-0.225589	-1.11841	1.32376	1.21893	-1.30091	-1.27208
NG_012091.1	IMPDH2	0.701728	0.746242	-1.64994	-1.60165	-1.4415	0.976554	0.994783	0.734513	1.09059	1.08486	0.726489	0.737771
NG_012097.1	LMAN1	-1.0876	-1.03197	0.990316	0.979661	-1.50425	-0.890293	-0.858145	-0.512925	1.65386	1.62284	-1.09575	-1.05777
NG_012103.1	MXI1	0.786043	NA	-1.38771	NA	NA	-0.639857	NA	-1.33949	1.36702	NA	0.987314	NA
NG_012106.1	OGG1	0.30406	0.386001	-2.98777	-2.95699	0.391516	0.546518	0.600952	0.392455	0.931562	0.960933	0.0790603	0.120467
NG_012107.1	OPCML	NA	NA	NA	NA	NA	NA	NA	NA	NA	NA	NA	NA
NG_012113.2	PIK3CA	NA	NA	NA	NA	NA	NA	NA	NA	NA	NA	NA	NA
NG_012117.1	PPP2R1B	-0.123435	-0.110258	-1.72611	-1.87789	-1.61112	0.881703	0.952303	0.47454	0.819604	0.860052	0.438346	0.460702
NG_012119.1	PTPN1	NA	NA	NA	NA	NA	NA	NA	NA	NA	NA	NA	NA
NG_012131.1	SNCB	NA	NA	NA	NA	NA	NA	NA	NA	NA	NA	NA	NA
NG_012138.1	TSG101	0.38183	0.434968	-0.73578	-0.748707	1.39594	0.389159	0.420548	-0.826584	1.48024	1.52821	-1.02659	-1.04429
NG_012140.1	ZBTB16	-0.324782	-0.162068	-0.571058	-0.468847	-0.0303952	-0.350733	-0.229043	-0.985474	1.12445	1.19979	2.34494	2.42894
NG_012141.2	TUSC3	0.28264	NA	-0.0135717	NA	NA	0.085881	NA	1.25955	1.52002	NA	-0.331254	NA
NG_012142.1	AXIN2	0.209081	0.200303	1.15952	1.08967	-1.15974	1.05309	1.00056	-0.466561	1.62563	1.5383	0.808231	0.750645
NG_012144.1	RAD54L	NA	0.565907	NA	NA	0.162918	NA	-0.225787	NA	NA	NA	NA	NA
NG_012150.1	PAPSS2	NA	NA	NA	NA	NA	NA	NA	NA	NA	NA	NA	NA
NG_012168.1	SDHDP5	-0.532843	-0.389555	-1.22375	-1.09787	-0.241888	-0.542359	-0.428207	-0.13626	0.981736	1.00215	2.58011	2.54453
NG_012170.1	RAB23	0.901555	0.905008	-0.500521	-0.483465	-0.526019	1.12821	1.10756	-0.496823	0.0323894	0.0283856	1.26886	1.23596
NG_012172.1	ADAMTSL4	0.0834308	0.149144	-0.288648	-0.253308	0.00930565	0.926549	0.971129	-0.405404	0.649803	0.679496	-0.382797	-0.343874
NG_012174.1	MRPS22	0.747551	0.805516	-0.834892	-0.905889	0.811856	-0.677027	-0.724287	1.14102	1.72294	1.79194	0.0262246	0.00917574
NG_012175.1	XYLT2	NA	NA	NA	NA	NA	NA	NA	NA	NA	NA	NA	NA
NG_012182.1	UBR1	0.441833	0.474925	-1.71518	-1.70134	-0.921134	0.895183	0.903296	-1.25662	1.42344	1.41186	-1.03771	-1.02397
NG_012187.1	ADRB1	-0.893338	-0.875783	-1.90371	-1.95613	0.361191	0.637234	0.625185	-0.489976	1.71277	1.67656	-1.48198	-1.52404
NG_012199.1	KHK	NA	NA	NA	NA	NA	NA	NA	NA	NA	NA	NA	NA
NG_012201.2	NTRK2	NA	NA	NA	NA	NA	NA	NA	NA	NA	NA	NA	NA
NG_012203.1	PLA2G4A	-0.393858	-0.323462	-0.293906	-0.258509	-0.0898748	0.287853	0.33525	1.08571	0.895928	0.922762	0.735021	0.773052
NG_012209.1	PTPRJ	-0.237642	-0.155441	-0.644471	-0.610959	-0.21714	-0.620227	-0.57081	1.85806	0.0490051	0.0875351	-0.453872	-0.412103
NG_012211.1	SCP2	NA	NA	NA	NA	NA	NA	NA	NA	NA	NA	NA	NA
NG_012219.1	DNM1L	-0.119388	-0.0165248	0.582233	0.622066	0.134624	1.03509	1.08253	0.597596	1.04182	1.05845	0.64934	0.691288
NG_012232.1	DMD	-1.62249	-1.50208	-1.2169	-1.16853	-0.985663	0.915383	0.906082	1.44218	-0.0680353	-0.080298	1.42426	1.36823
NG_012238.1	PIGM	0.0862163	NA	0.619044	NA	NA	1.0443	NA	-0.178753	0.686966	NA	0.386113	NA
NG_012247.1	SLC25A13	0.229849	0.21518	-0.414656	-0.712425	0.991529	-0.199831	-0.405124	-0.250853	0.322776	0.293254	1.49874	1.92249
NG_012257.2	ALDH6A1	0.0216799	0.0821922	0.484382	0.506057	0.563405	0.584112	0.622706	0.342013	1.36229	1.37444	0.492184	0.518066
NG_012258.1	ALDH18A1	-0.798913	-0.701252	-1.93786	-1.86304	0.403747	-0.620195	-0.549438	-0.775826	-0.196854	-0.149758	1.33179	1.37321
NG_012262.1	TOP1	1.07391	1.41049	-0.0348278	-0.214655	-0.832906	1.24692	1.63496	1.08818	1.5032	1.98019	-0.0180063	-0.186254
NG_012265.1	MCC	0.806405	0.852385	-1.15947	-1.15705	0.661143	0.661577	0.680458	0.927218	-0.655449	-0.661518	1.09545	1.09948
NG_012270.1	KCNMA1	-0.273791	-0.128012	-1.49703	-1.38211	-0.713763	1.90169	1.97745	1.03156	1.56457	1.61522	0.887378	0.965135
NG_012277.1	KLF6	NA	NA	NA	NA	NA	NA	NA	NA	NA	NA	NA	NA
NG_012302.1	UNC119	0.268704	0.29053	-0.396251	-0.724148	-0.733082	1.12512	1.51876	1.18831	0.516625	0.602073	-0.0058843	-0.14877
NG_012303.1	CSF1R	0.0438419	NA	-1.96738	NA	NA	1.12713	NA	-0.754794	0.0276278	NA	-0.762567	NA
NG_012318.1	INA	-0.308972	-0.615444	0.235048	0.0866216	1.32279	-0.546075	-0.954114	-0.516579	1.40652	1.65992	-0.352328	-0.7015
NG_012337.3	SDHD	NA	NA	NA	NA	NA	NA	NA	NA	NA	NA	NA	NA
NG_012343.1	ITGA7	-1.78928	-1.71139	-2.2935	-2.28693	0.333335	0.269267	0.298363	0.395988	1.29061	1.31058	0.344006	0.37001
NG_012344.1	ATP6V1G2	-1.04968	-0.999105	1.065	1.07934	1.0108	1.07715	1.10512	0.919755	-0.668427	-0.633052	0.950867	0.96912
NG_012345.1	PPARD	NA	NA	NA	NA	NA	NA	NA	NA	NA	NA	NA	NA
NG_012383.3	TRPS1	-1.57451	-1.52007	0.513881	0.603018	-0.0295935	0.246177	0.343996	1.00598	0.425868	0.496477	-2.53902	-2.61232
NG_012386.1	TSC1	NA	NA	NA	NA	NA	NA	NA	NA	NA	NA	NA	NA
NG_012447.2	HCRTR2	NA	NA	NA	NA	NA	NA	NA	NA	NA	NA	NA	NA
NG_012490.1	SOX9	NA	NA	NA	NA	NA	NA	NA	NA	NA	NA	NA	NA
NG_012494.1	AMELX	1.09635	1.16051	0.467244	0.494957	-0.588114	-0.198353	-0.135454	-0.762468	-0.695457	-0.654794	2.40254	2.39796
NG_012496.1	CLCN4	-0.808029	-0.749676	1.40078	1.43333	-0.511994	1.49853	1.53335	-1.03876	-0.215931	-0.195232	-0.723413	-0.696193
NG_012515.2	KCND1	NA	NA	NA	NA	NA	NA	NA	NA	NA	NA	NA	NA
NG_012518.2	PLS3	0.903283	1.17179	-1.17214	-0.98606	1.10293	-1.26121	-1.03629	-2.08581	2.41582	2.53848	0.794128	0.969407
NG_012519.1	PPEF1	-0.0589502	-0.0207481	-0.521495	-0.516395	-0.382889	0.0913204	0.105821	-0.229129	1.63508	1.61485	-0.0621075	-0.0566759
NG_012526.1	SMARCA1	0.915856	0.922191	-1.16905	-1.14109	1.39069	1.48266	1.45079	-1.37008	-0.488036	-0.48367	1.30455	1.27384
NG_012533.1	TIMP1	NA	NA	NA	NA	NA	NA	NA	NA	NA	NA	NA	NA
NG_012547.1	USP9X	1.1811	1.2409	-0.876956	-0.837661	1.40802	-0.739895	-0.684684	-0.839539	1.10736	1.13434	-0.921057	-0.877601
NG_012548.1	RBM10	0.605492	0.763497	0.00650383	-0.0897525	-1.13826	0.763937	0.95982	0.655862	1.11126	1.41826	0.660644	0.810704
NG_012549.1	PIR	NA	1.365	NA	-0.0301684	0.847413	NA	0.496205	NA	NA	0.293086	NA	-0.142549
NG_012551.1	MTMR1	0.0820104	0.112626	-0.788225	-0.761916	-0.364687	1.55388	1.49143	1.12528	-0.0450889	-0.0600268	1.35835	1.29346
NG_012557.1	REPS2	-0.610015	-0.529214	-0.686794	-0.629843	1.01175	-0.759528	-0.695905	-0.824949	1.43145	1.46036	0.869782	0.913324
NG_012558.1	RAB33A	1.55661	1.65852	-1.83778	-1.70926	-0.606639	0.260263	0.35808	-0.0103016	2.63916	2.64983	-1.03484	-0.919734
NG_012565.1	SEPTIN6	0.659718	0.870612	-1.39872	-1.23081	-0.397005	-0.286141	-0.114416	0.362681	2.73252	2.78103	0.538095	0.667663
NG_012566.3	IL1RAPL2	-0.203316	-0.117017	0.31809	0.352348	-1.02042	0.850661	0.904166	0.273031	0.108549	0.13604	0.492179	0.530316
NG_012570.1	TAF9B	-0.151996	0.0788972	-0.355379	-0.22227	1.3815	0.714384	0.870366	0.962183	0.254144	0.355092	0.852532	0.970602
NG_012577.1	LONRF3	NA	0.582845	NA	-2.72421	-0.830781	NA	-0.996853	NA	NA	1.95772	NA	0.0813441
NG_012622.2	SLC9A7	-0.0770173	0.00819172	-2.31667	-2.24782	0.430132	0.723983	0.780133	0.184532	-2.35001	-2.28849	0.249976	0.296392
NG_012624.1	TWNK	0.242905	0.307958	0.136555	0.150976	-0.466999	-0.554285	-0.550334	0.457501	1.27981	1.33657	-2.82833	-2.94089
NG_012631.1	TCF7L2	-0.251362	-0.0834886	-1.7153	-1.62722	-0.412713	-0.649984	-0.528459	-0.505751	0.785107	0.872423	2.34087	2.45751
NG_012633.1	RPS24	NA	NA	NA	NA	NA	NA	NA	NA	NA	NA	NA	NA
NG_012640.1	ADRA2C	NA	NA	NA	NA	NA	NA	NA	NA	NA	NA	NA	NA
NG_012641.1	CACNB4	0.706504	0.736337	-2.2153	-2.12417	0.598264	-1.00275	-0.941441	0.53969	-1.1049	-1.0626	-1.53677	-1.4663
NG_012642.1	CHN1	0.371391	NA	-1.71986	NA	NA	0.728607	NA	0.786807	1.0426	NA	0.71021	NA
NG_012648.1	TTC9	-1.05007	-0.932076	1.12627	1.14838	-0.524162	1.42678	1.4465	1.58147	-0.551867	-0.487146	-0.646415	-0.569852
NG_012649.1	ANTXR1	NA	NA	NA	NA	NA	NA	NA	NA	NA	NA	NA	NA
NG_012653.1	SLC4A4	-0.844986	-0.896342	0.62427	0.661984	-0.61151	-1.09051	-1.18875	1.25842	0.084822	0.0656504	-0.422235	-0.475437
NG_012663.1	CACNA2D4	-1.51659	-1.42972	-0.892658	-0.837913	-0.682801	-0.779459	-0.717408	-0.578114	1.81945	1.84062	0.963927	1.00396
NG_012664.1	TTBK2	-0.82992	-0.68908	-0.220265	-0.12613	0.471342	1.82351	1.94569	-0.661406	-0.701936	-0.621044	-0.660389	-0.563947
NG_012682.1	VCAN	NA	NA	NA	NA	NA	NA	NA	NA	NA	NA	NA	NA
NG_012691.1	B3GALT2	-1.2995	-0.959596	-0.38087	-0.269215	-1.52684	-0.323193	-0.194375	-1.65452	0.422947	0.385674	-0.349162	-0.233689
NG_012742.2	KALRN	NA	NA	NA	NA	NA	NA	NA	NA	NA	NA	NA	NA
NG_012745.1	SIX5	NA	NA	NA	NA	NA	NA	NA	NA	NA	NA	NA	NA
NG_012746.1	ZRSR2	0.0713251	0.011997	-1.4866	-2.33504	0.443003	0.273707	0.282737	0.473131	0.453691	0.519533	0.131753	0.0586025
NG_012748.1	ALDH1L2	0.514339	0.582101	-1.19511	-1.10292	-0.719862	-0.142989	-0.0725303	0.520043	1.00961	1.02256	-0.396101	-0.326671
NG_012771.2	TAF1	-0.176881	-0.0830827	-1.8784	-1.85764	-0.673418	0.528211	0.59653	-1.45957	1.92741	1.98289	-1.0436	-1.00699
NG_012797.1	MBTPS2	-0.691807	-0.632792	0.558365	0.587913	-0.586817	-0.274294	-0.233227	-0.627571	1.09079	1.11429	2.01054	2.0406
NG_012798.1	SCN9A	NA	NA	NA	NA	NA	NA	NA	NA	NA	NA	NA	NA
NG_012804.1	MANBA	-0.465396	-0.356136	-1.75385	-1.70106	1.15978	1.50222	1.58864	-0.225168	0.486953	0.543114	-0.435908	-0.370109
NG_012807.1	ST3GAL5	1.11195	1.18234	-1.08769	-1.12405	1.10193	1.2442	1.30047	-0.951513	1.61365	1.66249	1.19257	1.23646
NG_012820.1	ANK1	NA	NA	NA	NA	NA	NA	NA	NA	NA	NA	NA	NA
NG_012826.1	CHD2	0.244116	0.358955	-0.449908	-0.469704	0.0755957	0.689168	0.80999	-0.252122	0.953364	1.05828	-0.251163	-0.244119
NG_012827.1	CNTN4	1.55402	1.67445	-0.390916	-0.292159	1.12746	-1.00146	-0.865403	-0.146488	0.459168	0.528047	1.80958	1.86948
NG_012829.2	DCDC2	NA	NA	NA	NA	NA	NA	NA	NA	NA	NA	NA	NA
NG_012830.2	DDX3X	-2.21793	-2.14418	0.961699	0.978232	0.589957	0.698531	0.728176	0.840189	-0.644564	-0.62922	0.282541	0.306056
NG_012835.2	GABRA2	-0.059637	0.0148442	-0.940272	-0.991798	-1.36296	1.16358	1.27613	0.086073	1.50173	1.5949	1.0548	1.13989
NG_012836.1	GABRB3	NA	NA	NA	NA	NA	NA	NA	NA	NA	NA	NA	NA
NG_012838.2	GPI	NA	NA	NA	NA	NA	NA	NA	NA	NA	NA	NA	NA
NG_012839.1	GRM1	-0.213132	-0.193206	-0.0962097	-0.139074	-2.24825	0.9553	0.987379	0.783774	1.1301	1.11574	0.289805	0.267913
NG_012840.1	HS6ST2	-1.13661	-0.944547	-0.397432	-0.293619	-0.723786	-0.690028	-0.55235	-0.370483	0.685637	0.73143	0.952608	1.00266
NG_012842.2	KCNK9	0.0839253	0.127152	-1.19222	-1.15469	-2.06895	-0.529606	-0.496388	-0.632379	1.54421	1.48382	-0.155336	-0.146148
NG_012843.2	LPIN1	NA	NA	NA	NA	NA	NA	NA	NA	NA	NA	NA	NA
NG_012844.1	MAGED2	-1.3523	-1.25047	-0.345536	-0.285538	-0.661916	2.61457	2.68248	2.39416	-0.405701	-0.352907	-0.89973	-0.833863
NG_012846.1	MATR3	-0.439576	-0.392362	-1.65617	-1.63683	-0.922392	0.886127	0.910918	0.788976	1.10552	1.11707	0.401857	0.42245
NG_012849.2	PIK3R1	NA	NA	NA	NA	NA	NA	NA	NA	NA	NA	NA	NA
NG_012850.1	SLC25A14	-1.33635	-1.24641	1.36149	1.41668	-1.23378	1.96854	2.05294	0.00270663	0.386687	0.432234	-0.207851	-0.14907
NG_012851.2	SLC7A7	NA	NA	NA	NA	NA	NA	NA	NA	NA	NA	NA	NA
NG_012855.1	SYNE1	-0.15734	-0.101664	-2.63588	-2.599	0.143491	0.334773	0.356659	0.331278	0.830248	0.817166	0.384459	0.391232
NG_012857.1	TRIOBP	2.02848	2.28768	-0.263038	-0.21799	0.116294	1.14357	1.29879	0.0603863	-0.191027	-0.158571	-1.31383	-1.32255
NG_012872.1	GSN	-0.503438	-0.704079	-1.08338	-1.48817	1.11787	0.347683	0.358856	-0.735116	0.919981	1.08263	-0.495387	-0.728528
NG_012875.3	MKRN3	0.124616	0.15457	1.26491	1.26704	-0.125457	-0.329729	-0.323042	-0.0115955	-0.175044	-0.186248	0.0460373	0.0459894
NG_012877.2	PPOX	NA	NA	NA	NA	NA	NA	NA	NA	NA	NA	NA	NA
NG_012881.1	SOX6	-1.6763	-1.42537	-1.30835	-1.206	0.573669	0.417922	0.560022	-0.157556	2.029	2.06092	-0.754412	-0.641214
NG_012883.2	KIFAP3	0.499806	0.508221	0.816693	0.782185	-0.760445	-0.791648	-0.801651	0.952518	0.0944762	0.0597331	0.944841	0.913491
NG_012884.2	DNASE1L1	0.82753	0.879832	-1.60589	-1.56427	1.25048	1.56147	1.59074	1.60676	-0.410946	-0.382597	0.597011	0.627691
NG_012922.1	GSK3B	NA	NA	NA	NA	NA	NA	NA	NA	NA	NA	NA	NA
NG_012925.1	MYO5B	NA	NA	NA	NA	NA	NA	NA	NA	NA	NA	NA	NA
NG_012958.1	SNRPN	NA	NA	NA	NA	NA	NA	NA	NA	NA	NA	NA	NA
NG_012964.1	KRIT1	0.0880767	0.182618	-1.51946	-1.45905	0.082723	0.828113	0.889996	0.4633	-0.221682	-0.180136	0.522782	0.572265
NG_012965.1	PRICKLE1	NA	NA	NA	NA	NA	NA	NA	NA	NA	NA	NA	NA
NG_012969.1	FTO	NA	NA	NA	NA	NA	NA	NA	NA	NA	NA	NA	NA
NG_012971.1	KIRREL3	0.852777	0.946966	0.58505	0.639985	0.0297102	1.22681	1.28377	-0.56924	1.48609	1.51509	-0.201575	-0.126066
NG_012989.1	PEG3	NA	NA	NA	NA	NA	NA	NA	NA	NA	NA	NA	NA
NG_013009.1	EMX2	-0.901379	-0.883672	-0.773128	-0.804474	-0.553632	0.860955	0.888285	-0.343354	2.97585	3.01437	0.158637	0.153718
NG_013010.1	GLUD1	NA	NA	NA	NA	NA	NA	NA	NA	NA	NA	NA	NA
NG_013012.1	IDE	-0.602738	-0.491709	-1.28797	-1.22357	-0.833947	1.64213	1.71322	0.9704	0.178373	0.232417	-1.18113	-1.11157
NG_013013.2	SMAD4	-0.269989	-0.174574	1.46913	1.52575	0.0867743	0.543169	0.613758	-0.386511	1.05771	1.09246	0.0524365	0.0895522
NG_013017.1	PITPNA	-0.784496	-0.696632	-1.20509	-1.15263	-0.520913	1.51737	1.59234	-1.10552	0.0182501	0.0661778	-0.746428	-0.689243
NG_013021.1	RGS9	NA	NA	NA	NA	NA	NA	NA	NA	NA	NA	NA	NA
NG_013030.1	RAP1GAP2	-0.295917	-0.208157	-2.13106	-2.05696	-1.11294	0.236665	0.296659	0.414408	0.939087	0.970328	-1.08384	-1.01795
NG_013033.1	PDSS2	0.560113	0.691947	-2.50982	-2.42399	-0.730822	1.15236	1.24802	-1.36215	1.56787	1.63157	0.80138	0.883905
NG_013035.1	CC2D2A	-0.359984	-0.254236	-1.61836	-1.52256	-0.272918	0.233344	0.300575	-0.162722	0.548445	0.585832	0.680679	0.726854
NG_013036.1	NPAS3	0.0231527	0.166409	-0.0886853	0.00035659	1.13657	1.03168	1.13377	0.0122543	1.8157	1.87987	-1.30693	-1.20207
NG_013037.1	REEP1	0.217266	0.272649	-2.47906	-2.4618	-0.547429	0.429364	0.462558	0.814631	0.744904	0.758494	0.139765	0.163588
NG_013068.1	MYO9B	0.212258	0.289265	-1.55997	-1.48995	0.69435	0.933276	0.975746	0.375183	0.320548	0.355276	-1.03678	-0.970738
NG_013071.1	FXYD6	NA	NA	NA	NA	NA	NA	NA	NA	NA	NA	NA	NA
NG_013080.1	TF	0.803842	0.870362	1.55856	1.68291	-0.665385	-0.625959	-0.743865	0.712266	-0.165098	-0.249452	0.0236798	-0.0281778
NG_013083.1	NECTIN1	0.278214	0.33983	-2.62427	-2.59051	0.412684	0.200821	0.238033	0.0143378	0.747153	0.75945	0.396494	0.421956
NG_013210.1	ASPH	-0.619165	-0.607835	0.749084	0.809818	-1.37996	0.786402	0.871647	0.338841	0.891608	0.953574	1.04515	1.12865
NG_013224.2	ATP7A	0.354683	NA	0.254279	NA	NA	0.631434	NA	-0.458264	0.390719	NA	-0.535339	NA
NG_013249.1	TENM1	2.14218	2.22632	-0.482811	-0.412985	-0.883853	-0.720307	-0.626282	-1.47704	0.403425	0.461517	-1.24627	-1.16836
NG_013258.1	PABPC1P3	0.0322059	0.0709489	0.559066	0.562459	0.0887637	0.371283	0.384781	0.138981	0.405748	0.400371	0.0236124	0.027185
NG_013302.2	CTNNB1	0.0334685	0.108879	0.780042	0.818193	-1.88071	-0.0942661	-0.0447555	0.660128	1.31662	1.34973	0.728176	0.770792
NG_013306.1	SLC46A1	NA	NA	NA	NA	NA	NA	NA	NA	NA	NA	NA	NA
NG_013325.2	MAPK10	-0.114627	-0.0667082	-2.1657	-2.1954	-1.2075	1.22723	1.27336	0.647522	0.63612	0.64183	0.73135	0.752365
NG_013337.1	APBB2	-0.312192	-0.248012	-0.983902	-0.934089	-0.34243	-0.669831	-0.612679	-0.943974	-0.306144	-0.292107	1.469	1.42076
NG_013341.2	DCC	-0.228044	-0.171449	-0.342941	-0.409392	0.307821	0.220224	0.298309	0.0672151	2.30571	2.72	-0.267297	-0.307705
NG_013344.1	EPB41	NA	NA	NA	NA	NA	NA	NA	NA	NA	NA	NA	NA
NG_013347.2	GLUL	NA	NA	NA	NA	NA	NA	NA	NA	NA	NA	NA	NA
NG_013350.1	NR3C2	0.0367635	0.0709593	-1.92738	-1.90858	-0.124967	0.901706	0.905692	0.753968	-0.606178	-0.607828	-0.315332	-0.309291
NG_013355.1	NDUFV2	-1.65477	-1.55467	-1.15348	-1.10706	-1.67259	0.639377	0.655931	-1.01019	0.900257	0.891266	0.530558	0.541096
NG_013368.1	PDHX	NA	NA	NA	NA	NA	NA	NA	NA	NA	NA	NA	NA
NG_013369.1	PTCH2	NA	NA	NA	NA	NA	NA	NA	NA	NA	NA	NA	NA
NG_013373.1	NRG3	0.0882525	0.271435	-0.0056578	0.106656	0.393127	0.566124	0.682713	0.143618	1.63531	1.66987	0.715043	0.808099
NG_013376.1	PALLD	NA	NA	NA	NA	NA	NA	NA	NA	NA	NA	NA	NA
NG_013377.1	CLCF1	1.09758	1.16961	-2.02386	-1.98325	1.29941	1.09594	1.12855	-0.420767	1.07412	1.07651	0.719647	0.744053
NG_015798.1	LEF1	NA	NA	NA	NA	NA	NA	NA	NA	NA	NA	NA	NA
NG_015800.1	NT5C3A	NA	NA	NA	NA	NA	NA	NA	NA	NA	NA	NA	NA
NG_015801.1	MEX3C	1.33671	1.31938	-1.4145	-1.34789	-0.475275	-0.810273	-0.756093	-0.52664	0.354308	0.336844	-0.394901	-0.368483
NG_015803.1	PPP1R9A	1.17358	1.26212	-0.734858	-0.648472	0.363424	-0.305622	-0.210865	1.54089	0.222221	0.285284	-1.20881	-1.10985
NG_015811.1	NDUFAF5	0.399067	NA	-1.86924	NA	NA	-0.333913	NA	0.582175	1.44602	NA	0.292917	NA
NG_015813.1	KIAA1109	1.51738	1.55933	-0.256744	-0.241714	-0.167829	-0.0081753	0.0179653	-0.552557	0.90999	0.917002	-0.206899	-0.188446
NG_015815.1	ZNF397	NA	NA	NA	NA	NA	NA	NA	NA	NA	NA	NA	NA
NG_015817.1	STRADA	0.130496	0.107778	0.282456	0.326752	0.0555684	0.339272	0.446067	0.313021	0.587344	0.853637	0.276483	0.321779
NG_015820.1	CHMP4B	NA	NA	NA	NA	NA	NA	NA	NA	NA	NA	NA	NA
NG_015822.2	LCORL	NA	NA	NA	NA	NA	NA	NA	NA	NA	NA	NA	NA
NG_015823.1	GLRB	0.966073	1.14351	1.23996	1.4469	1.09359	1.19886	1.40797	-0.135702	1.31486	1.53253	1.05145	1.22092
NG_015830.1	IRS1	-1.74452	NA	-0.158059	NA	NA	-0.180577	NA	0.291355	0.813742	NA	0.537932	NA
NG_015831.2	LEPR	NA	NA	NA	NA	NA	NA	NA	NA	NA	NA	NA	NA
NG_015833.1	RB1CC1	NA	NA	NA	NA	NA	NA	NA	NA	NA	NA	NA	NA
NG_015837.1	AURKAP1	NA	NA	NA	NA	NA	NA	NA	NA	NA	NA	NA	NA
NG_015841.1	TPM4	-0.0547097	0.00958598	1.18102	1.19748	0.0301312	0.777718	0.811434	0.629897	-1.04384	-1.031	-1.31727	-1.2902
NG_015843.1	XYLT1	-0.962271	-0.855746	0.0648388	0.101283	-0.63358	-0.287833	-0.229629	-2.58366	0.992095	1.00135	0.343685	0.382049
NG_015848.1	CSTF2	-1.01402	-0.926012	-1.34971	-1.29456	-1.38762	0.964304	0.991958	0.964054	-0.838445	-0.801391	0.882043	0.896735
NG_015849.1	DLG3	-0.821423	-0.739387	-0.573038	-0.523517	0.482961	1.05534	1.10919	1.59891	2.18076	2.19646	1.62887	1.66054
NG_015851.1	HDAC8	NA	NA	NA	NA	NA	NA	NA	NA	NA	NA	NA	NA
NG_015864.1	EIF2B3	NA	NA	NA	NA	NA	NA	NA	NA	NA	NA	NA	NA
NG_015874.1	NLGN3	0.116176	0.193125	-0.441523	-0.403166	0.380483	-1.14153	-1.10003	0.214915	1.64011	1.66657	0.668523	0.709355
NG_015875.1	OGT	0.495338	0.509435	0.536676	0.529907	-1.30347	-1.28098	-1.20669	-1.32369	1.22677	1.19343	0.779197	0.768011
NG_015886.1	ZIC1	-0.543893	-0.531787	-0.690983	-0.722258	0.319853	0.598647	0.442845	0.261782	0.0240607	-0.0976113	1.54647	1.27193
NG_015888.1	CDK6	0.17867	0.376622	-2.14965	-2.08147	0.330923	-0.445687	-0.314649	-0.104835	1.98789	2.13423	1.92924	2.09768
NG_015890.1	SLC1A3	-0.369062	-0.345394	1.07736	1.11998	1.35653	1.54474	1.61859	-0.162451	1.75398	1.81411	1.60529	1.66975
NG_015892.1	BSN	-0.618442	-0.653332	-1.55912	-1.82729	0.377487	-0.184111	-0.207709	-0.502414	1.67731	1.8887	0.412188	0.457328
NG_015895.1	FHL1	NA	NA	NA	NA	NA	NA	NA	NA	NA	NA	NA	NA
NG_015966.1	GPR173	-1.26544	-1.24697	-0.371451	-0.379888	-0.224955	0.858788	0.902947	-0.077559	1.55894	1.58818	0.187363	0.198711
NG_015979.1	NOS1AP	-1.22011	-1.03262	-0.762611	-0.704365	-0.284328	-0.285054	-0.152874	-0.534847	1.73611	1.86076	-0.613554	-0.532485
NG_015996.1	DIP2A	NA	NA	NA	NA	NA	NA	NA	NA	NA	NA	NA	NA
NG_015998.1	DLC1	2.46291	2.63355	-1.50679	-1.45769	0.394385	-0.131356	-0.0283448	0.359569	-0.278052	-0.21432	-0.532967	-0.455303
NG_016002.2	GNAI2	0.100734	0.169057	0.391321	0.423159	0.784328	0.516487	0.566979	-1.386	1.09361	1.12043	0.334462	0.370312
NG_016012.1	LMBRD1	0.0712556	0.104212	-1.33371	-1.30283	-0.168074	1.1401	1.11918	1.22015	1.637	1.57529	1.26224	1.2238
NG_016020.1	PITPNM3	NA	NA	NA	NA	NA	NA	NA	NA	NA	NA	NA	NA
NG_016022.1	POU6F2	1.46404	1.62274	-1.40594	-1.31244	-0.190938	-0.260599	-0.142432	-0.130013	1.61681	1.71817	-0.339562	-0.233958
NG_016137.1	SYNGAP1	-1.18851	-1.01852	-1.73848	-1.83107	1.22523	-0.362087	-0.229111	-0.197747	-0.391139	-0.375994	0.791052	0.99603
NG_016138.1	DARS2	0.0322747	0.0954047	-0.718908	-0.676941	1.04141	-0.0899462	-0.0472403	1.41276	0.484051	0.509346	1.38135	1.40806
NG_016144.1	ITPR1	0.816069	0.867878	-1.6435	-1.64998	-0.884341	1.23084	1.2694	-0.572533	-0.40514	-0.394832	1.28673	1.33623
NG_016150.1	SPTBN2	NA	NA	NA	NA	NA	NA	NA	NA	NA	NA	NA	NA
NG_016171.1	GAB2	1.66967	1.78317	-1.09879	-1.02798	0.239975	-0.62773	-0.536815	-1.01434	0.532265	0.601637	0.871915	0.955825
NG_016193.1	HLCS	1.60418	1.78813	-1.87826	-1.74393	1.45739	0.95919	1.10297	-0.0935274	0.831684	0.941944	2.16114	2.28584
NG_016194.1	GNAS	-0.568111	-0.511677	-0.723758	-0.700714	1.05773	0.335876	0.378564	1.23057	1.51859	1.54866	-0.499086	-0.470824
NG_016195.1	CACNB2	NA	NA	NA	NA	NA	NA	NA	NA	NA	NA	NA	NA
NG_016198.1	ME2	0.998061	NA	-1.15879	NA	NA	1.2043	NA	1.14129	0.372931	NA	-0.767509	NA
NG_016201.1	RREB1	-0.0268549	0.0791999	-1.40902	-1.3803	-1.11852	0.461597	0.540421	-0.271396	0.253768	0.295646	-0.344344	-0.293833
NG_016206.1	KIAA0319	1.19718	1.26232	0.855412	0.887561	0.133125	-0.41309	-0.369753	1.42233	1.70717	1.73284	1.44485	1.48087
NG_016207.1	SLC35A1	-0.201559	-0.0966615	-0.0176176	0.0358162	0.294862	0.459403	0.519789	0.432649	0.972234	0.99434	0.481375	0.528874
NG_016209.1	RIMS1	-0.809551	-0.73244	-1.39218	-1.35401	0.357817	0.513919	0.543463	0.627997	0.908517	0.91015	0.45544	0.476312
NG_016210.1	LEMD3	-0.958264	-0.855139	0.808146	0.835171	0.818627	-1.14752	-1.06335	0.951568	1.29093	1.30046	-0.964721	-0.894151
NG_016212.1	ATXN10	NA	NA	NA	NA	NA	NA	NA	NA	NA	NA	NA	NA
NG_016215.1	CADPS2	NA	NA	NA	NA	NA	NA	NA	NA	NA	NA	NA	NA
NG_016227.1	COA3	-0.980533	-1.2626	0.79268	0.913482	-0.759597	0.884351	1.03645	0.68876	1.38537	1.64713	0.567065	0.635711
NG_016238.1	ALG13	0.0742741	0.177539	-1.19771	-1.13577	-1.14616	-1.30078	-1.22414	-1.08413	1.07082	1.11295	0.726494	0.784421
NG_016249.1	UBQLN2	-0.588769	-0.488631	-0.909426	-0.912458	-0.476661	0.795008	0.830046	-0.765421	1.95624	1.94277	0.994094	1.00827
NG_016255.2	CCDC120	NA	NA	NA	NA	NA	NA	NA	NA	NA	NA	NA	NA
NG_016256.1	TCEAL8	-0.35261	-0.481968	0.344895	0.285009	1.32434	-0.645064	-0.82809	-0.282922	-1.95376	-2.36456	1.58756	1.70482
NG_016260.1	KDM6A	NA	NA	NA	NA	NA	NA	NA	NA	NA	NA	NA	NA
NG_016261.2	HUWE1	-0.449037	-0.341141	-1.74606	-1.6264	-0.634119	0.231525	0.295029	0.161811	1.54969	1.54553	-2.12313	-1.98597
NG_016263.2	GRIPAP1	NA	NA	NA	NA	NA	NA	NA	NA	NA	NA	NA	NA
NG_016266.1	CNKSR2	1.04053	1.13812	0.751721	0.782466	0.366277	0.963551	1.01664	0.256396	-1.63291	-1.68305	0.296158	0.321953
NG_016267.1	TXLNG	NA	NA	NA	NA	NA	NA	NA	NA	NA	NA	NA	NA
NG_016269.1	AK2	0.256743	0.477423	-0.638554	-0.783893	0.701883	0.888414	1.18484	-1.61683	1.91642	2.37193	0.331718	0.440632
NG_016272.1	FGF9	0.589176	0.696623	-0.111802	-0.062094	0.772276	0.664439	0.745873	0.634388	1.37645	1.43782	0.45518	0.51746
NG_016277.1	STIM1	0.338402	0.376505	-1.18692	-1.40822	-1.19958	0.522689	0.564593	0.827085	1.19759	1.31679	-0.536258	-0.658491
NG_016283.1	SCN3B	0.594611	NA	0.668196	NA	NA	0.200068	NA	0.159968	0.791666	NA	0.493445	NA
NG_016287.1	ADAMTS17	0.446743	0.55533	0.992237	1.07631	0.526273	0.54425	0.631294	-0.368455	0.830103	0.902684	0.811778	0.895466
NG_016293.1	VRK1	1.15653	1.23991	-2.15503	-2.21044	-0.816254	1.19183	1.25009	1.21734	1.61186	1.64484	-0.14162	-0.140436
NG_016295.1	CCM2	-0.721689	-0.661706	1.30287	1.35469	1.13143	-0.227162	-0.181869	0.880463	1.40682	1.45399	0.869652	0.919871
NG_016297.2	TFE3	NA	NA	NA	NA	NA	NA	NA	NA	NA	NA	NA	NA
NG_016311.1	DICER1	NA	NA	NA	NA	NA	NA	NA	NA	NA	NA	NA	NA
NG_016313.1	AFF2	-1.97333	-1.82584	-0.261326	-0.265725	0.24508	1.07397	1.04261	0.135996	-1.4421	-1.41168	-0.730986	-0.705553
NG_016315.2	TCEAL4	0.3947	0.45665	0.778757	0.800543	-1.40702	0.643859	0.684003	-1.38791	0.77421	0.790324	0.324613	0.356894
NG_016325.1	MED14	-1.54369	-1.32054	-0.0212588	-0.0107246	0.10619	-0.355281	-0.295723	-1.10808	-0.559284	-0.500603	-1.14699	-1.00588
NG_016328.1	PIN4	-1.26272	-1.28128	-0.598165	-0.637207	1.94374	-1.13357	-1.17864	-0.0373816	0.645524	0.656507	1.3554	1.41612
NG_016330.2	ZMAT1	-0.395474	-0.266615	-1.91407	-1.86426	1.11308	0.619524	0.732558	0.75946	0.307498	0.372265	-0.363285	-0.287412
NG_016335.1	ADAM9	1.57779	1.65895	-0.809083	-0.729735	-0.528012	-0.287658	-0.198119	-0.649051	-0.379265	-0.31344	-0.61208	-0.530386
NG_016339.1	ARAF	NA	NA	NA	NA	NA	NA	NA	NA	NA	NA	NA	NA
NG_016361.1	CDR1	NA	NA	NA	NA	NA	NA	NA	NA	NA	NA	NA	NA
NG_016363.1	TERC	0.00528678	0.168702	0.235757	0.322038	-0.42455	0.406557	0.521922	-0.384854	2.25609	2.31699	-0.320217	-0.222058
NG_016369.1	LAS1L	NA	NA	NA	NA	NA	NA	NA	NA	NA	NA	NA	NA
NG_016376.1	CXorf38	1.2812	1.32719	1.38147	1.38933	1.04645	0.489407	0.517031	-0.0094569	1.59513	1.59381	-1.21939	-1.18805
NG_016385.1	RBM41	-0.116976	0.0200186	-0.180289	-0.111483	-0.188107	1.29797	1.39257	-0.258822	-0.832723	-0.777052	1.20499	1.28297
NG_016391.2	GLIS2	NA	NA	NA	NA	NA	NA	NA	NA	NA	NA	NA	NA
NG_016403.1	DRP2	NA	NA	NA	NA	NA	NA	NA	NA	NA	NA	NA	NA
NG_016419.1	FRMPD4	-0.0646842	0.00402416	-1.1264	-0.96297	1.05603	-0.472823	-0.38266	-0.309118	0.0564299	0.026642	-0.523143	-0.444428
NG_016422.1	CLCN2	0.944721	0.972504	-2.12538	-2.09056	-0.728564	1.17782	1.18191	0.397724	1.34447	1.33586	0.239779	0.252789
NG_016423.1	DYNC2H1	-0.45413	-0.498014	-0.274041	-0.347234	-0.664416	1.6583	1.78747	1.60822	0.672152	0.677402	1.45563	1.54758
NG_016424.1	EIF2AK3	-0.473111	-0.374197	1.74663	1.7961	-0.903632	-0.182083	-0.114314	1.43965	-0.181558	-0.13989	1.50923	1.56431
NG_016426.1	GABBR2	NA	NA	NA	NA	NA	NA	NA	NA	NA	NA	NA	NA
NG_016431.1	ZEB2	-1.14989	-1.02213	0.00498051	0.0574712	0.528985	0.619539	0.733104	0.174761	2.16607	2.24853	0.414471	0.489209
NG_016437.1	LTBP3	0.833615	0.864743	-0.921952	-0.90798	-0.472291	0.892458	0.909548	0.897635	1.15873	1.16279	0.891216	0.902676
NG_016439.1	MCF2	-0.369582	-0.315757	-0.159232	-0.135657	1.46986	-0.269499	-0.235885	-0.0017681	0.364856	0.38696	-0.0789587	-0.0506161
NG_016440.1	MAF	-0.593345	-0.371692	-0.814662	-0.728062	-0.854433	0.728987	0.91833	1.19448	1.80814	1.93034	0.69489	0.832609
NG_016443.2	MEF2A	NA	NA	NA	NA	NA	NA	NA	NA	NA	NA	NA	NA
NG_016469.1	AMMECR1	-0.647499	-0.461797	-1.39987	-1.37495	-1.07588	0.104759	0.305633	-0.437897	1.87028	2.19257	-0.038488	0.127897
NG_016478.2	TRAPPC9	NA	NA	NA	NA	NA	NA	NA	NA	NA	NA	NA	NA
NG_016545.1	BTBD9	-0.340765	NA	-0.52566	NA	NA	1.73953	NA	-0.785271	0.122647	NA	1.61112	NA
NG_016550.1	ATP11C	-0.545355	-0.937667	-0.22191	-0.520995	-0.853496	0.814955	0.99419	0.280142	1.99184	2.65581	1.25488	1.61035
NG_016567.1	MTMR8	NA	NA	NA	NA	NA	NA	NA	NA	NA	NA	NA	NA
NG_016598.1	PHKB	-1.40749	-1.31236	0.767313	0.813089	-1.53812	0.751959	0.821285	-0.461975	1.41316	1.44534	1.21969	1.26647
NG_016599.1	PHKA1	-0.620608	-0.629927	0.49265	0.435148	-0.795965	-0.643845	-0.689765	1.12326	0.847798	0.78068	2.86148	2.81699
NG_016606.1	GPD2	-0.0139329	0.0234934	-2.7514	-2.75191	0.743471	0.964783	0.980265	-1.00974	-0.543045	-0.530808	0.818127	0.83128
NG_016607.1	MSH3	0.983696	1.15211	-1.12643	-0.999077	-0.317355	0.707766	0.834435	0.162683	1.02177	1.1099	0.887963	0.998981
NG_016620.1	SCAI	-1.13187	-0.779022	0.283056	0.443132	0.343958	-0.402247	-0.173917	-2.17605	2.18622	2.34918	0.495642	0.686389
NG_016623.1	STXBP1	-0.186411	-0.133457	-0.439709	-0.481116	-0.581507	0.46511	0.487339	0.247707	1.01827	1.01841	-0.115	-0.133956
NG_016644.2	RETREG1	NA	NA	NA	NA	NA	NA	NA	NA	NA	NA	NA	NA
NG_016647.1	TP53INP1	NA	NA	NA	NA	NA	NA	NA	NA	NA	NA	NA	NA
NG_016702.1	CYGB	-1.026	-0.968826	1.28287	1.32142	-0.996355	0.959584	1.01048	0.621825	1.34568	1.37703	-0.890573	-0.869518
NG_016711.1	ARHGAP26	0.213223	NA	-0.790644	NA	NA	-0.38854	NA	1.13565	1.79374	NA	1.46255	NA
NG_016712.1	WWC1	-0.500073	-0.422706	-0.76368	-0.716146	-0.370486	-0.756017	-0.694937	-0.628557	0.316845	0.317643	2.04959	1.99929
NG_016715.1	TUBB2B	NA	NA	NA	NA	NA	NA	NA	NA	NA	NA	NA	NA
NG_016742.1	KCNJ13	NA	NA	NA	NA	NA	NA	NA	NA	NA	NA	NA	NA
NG_016746.1	YTHDF2	NA	NA	NA	NA	NA	NA	NA	NA	NA	NA	NA	NA
NG_016747.1	PPARGC1B	-0.417493	NA	1.9178	NA	NA	0.758341	NA	-0.579696	0.50117	NA	-0.590061	NA
NG_016753.1	NR2F2	-1.51744	-1.44037	-0.435535	-0.395654	-1.74617	2.32592	2.40994	0.201948	0.375537	0.406786	2.00611	2.05522
NG_016754.1	GPR34	-1.01292	-0.901266	-1.85291	-1.77597	1.16333	-1.04194	-0.959215	1.82557	0.744635	0.790321	0.826445	0.885358
NG_016757.1	CLEC16A	NA	NA	NA	NA	NA	NA	NA	NA	NA	NA	NA	NA
NG_016758.1	EHBP1	NA	NA	NA	NA	NA	NA	NA	NA	NA	NA	NA	NA
NG_016760.1	EFHC1	-0.462221	-0.351831	1.24972	1.31995	-0.357354	1.22363	1.33116	1.41437	1.68504	1.74759	-0.178972	-0.109318
NG_016798.1	POLA1	0.564524	0.661624	-0.407261	-0.327165	0.224604	1.42036	1.48374	-0.187075	-0.564938	-0.488266	-1.18594	-1.08959
NG_016807.2	KCNN3	-0.947291	NA	1.14512	NA	NA	-0.500363	NA	0.849213	1.4187	NA	0.917745	NA
NG_016810.1	NCOA3	-0.107672	0.0525918	0.358478	0.412435	-1.69045	0.111054	0.210501	-0.0351727	2.12782	2.03908	0.45841	0.513382
NG_016853.2	MEG3	NA	NA	NA	NA	NA	NA	NA	NA	NA	NA	NA	NA
NG_016864.1	CRBN	NA	-0.798619	NA	-0.196706	1.12205	NA	1.41353	NA	NA	1.63841	NA	1.19471
NG_016932.2	LPP	NA	NA	NA	NA	NA	NA	NA	NA	NA	NA	NA	NA
NG_016965.1	FKBP1AP2	0.71804	0.870213	-0.93981	-1.3852	-0.271431	-0.13584	-0.295919	-0.0017318	-0.105466	-0.274693	-0.0937779	-0.248458
NG_016966.1	PGM1	-0.0484131	0.0173296	-0.638003	-0.60295	1.51471	1.78971	1.83169	-0.606433	0.0890949	0.115852	-0.0729737	-0.036093
NG_016970.1	TRIP11	1.31524	1.37579	1.42691	1.44759	0.273946	-1.30378	-1.16824	1.2153	0.810494	0.845599	-0.759978	-0.656968
NG_016971.1	TSFM	NA	NA	NA	NA	NA	NA	NA	NA	NA	NA	NA	NA
NG_016972.1	RAB3GAP1	0.3673	0.450963	-0.0006811	-0.0668657	0.467533	-0.578923	-0.788971	-0.871382	0.908886	1.08811	0.632109	0.748123
NG_016974.1	TTLL5	1.65687	1.7312	-1.09165	-1.00354	0.00778689	1.16371	1.22225	-1.24889	0.0676122	0.128403	-1.17105	-1.07651
NG_016975.1	ARHGEF9	1.04213	1.16443	-0.0652329	0.00037082	0.00930112	2.11577	2.21672	-1.27989	0.0405691	0.097469	-0.73169	-0.6606
NG_016976.1	SATB2	-0.880373	NA	-1.23698	NA	NA	-0.0110064	NA	-0.0473127	2.08233	NA	0.906763	NA
NG_016977.1	INHA	0.543784	0.795206	-0.136835	-0.29483	-1.10885	0.844644	1.23401	0.0756413	-0.0124974	-0.111219	0.318042	0.409823
NG_016981.1	INTS9	NA	NA	NA	NA	NA	NA	NA	NA	NA	NA	NA	NA
NG_016983.1	KLHL7	0.816438	0.896802	-1.84658	-1.99639	0.859791	1.17115	1.25479	0.922258	-0.0888543	-0.114688	-0.497484	-0.543043
NG_016984.2	MYH7B	1.02464	1.10922	-1.15974	-1.08656	-0.682045	-0.292594	-0.217464	1.10118	0.577851	0.620968	-0.712484	-0.640887
NG_016989.2	MPLKIP	0.500023	0.580193	-1.29953	-1.25337	0.473266	1.04299	1.08815	0.256524	0.959298	0.973793	-1.07986	-1.03014
NG_017003.1	MBD5	0.0397534	0.149131	-0.478292	-0.414652	-0.0695748	-0.382136	-0.301392	1.30442	-0.606711	-0.550797	-1.2998	-1.21985
NG_017044.1	SLC1A1	NA	NA	NA	NA	NA	NA	NA	NA	NA	NA	NA	NA
NG_017048.1	ZEB1	0.783769	0.938243	-1.12869	-1.01943	0.66608	0.149516	0.269029	0.327038	2.62894	2.69696	1.83825	1.92944
NG_017058.1	RRAS2	-0.103827	0.0577829	-1.99447	-1.89814	0.25393	0.338916	0.467178	-0.490342	0.15306	0.248748	-0.81219	-0.704028
NG_017060.1	PNKD	0.910725	0.996703	0.609278	0.663766	-0.883697	-0.858613	-0.788252	0.801973	-0.34133	-0.293149	-1.18225	-1.12358
NG_017061.1	KIFBP	NA	NA	NA	NA	NA	NA	NA	NA	NA	NA	NA	NA
NG_017062.1	HIBCH	0.187731	0.246249	0.182825	0.185092	0.0758102	0.528914	0.631423	-0.423011	1.08254	1.27966	0.35964	0.408535
NG_017067.1	KIF21A	0.896108	0.944314	-1.21119	-1.17758	-1.20899	-0.723494	-0.682334	-0.840608	1.42752	1.43773	0.936196	0.958467
NG_017068.1	MTMR14	0.748365	0.807953	-0.788103	-0.748271	-0.513644	-0.23892	-0.195289	0.853082	1.19936	1.21687	0.787127	0.81666
NG_017071.1	NAA25	0.271304	0.308508	0.423865	0.480117	-0.192017	-0.495644	-0.749735	-0.801848	1.11589	1.41232	-0.354094	-0.571211
NG_017075.1	ZFYVE27	NA	NA	NA	NA	NA	NA	NA	NA	NA	NA	NA	NA
NG_017077.1	SLC9A9	0.26436	NA	0.0050823	NA	NA	1.02792	NA	0.434537	-0.901525	NA	0.743791	NA
NG_017078.2	RAD52	NA	NA	NA	NA	NA	NA	NA	NA	NA	NA	NA	NA
NG_017091.1	MED25	-0.56128	-0.500944	0.60931	0.635953	1.32399	1.40718	1.45025	-0.952447	-0.301714	-0.279424	0.964635	0.994475
NG_017092.1	NEBL	1.17201	1.34765	-0.811899	-0.730122	1.92994	-0.19584	-0.0811254	1.9229	0.260485	0.347169	-1.14222	-1.05829
NG_017093.2	MAMLD1	-0.132661	-0.451902	0.290042	0.226532	0.402602	-0.193815	-0.594731	-0.0678708	1.84642	2.91968	0.282101	0.219425
NG_017135.1	PRICKLE3	0.375314	0.428717	0.441678	0.452335	0.0296855	0.867123	0.889663	-0.657529	0.788942	0.789243	0.111391	0.129377
NG_017155.1	DMXL2	0.241182	0.321772	-2.04903	-2.00276	-0.735818	0.867145	0.921171	-1.89217	-0.899065	-0.86312	0.961551	1.0047
NG_017156.1	FAM118B	0.69109	0.737199	0.181852	0.201982	-0.96785	-1.0494	-1.01938	0.679368	0.555549	0.567637	0.996812	1.01564
NG_017158.1	HDX	0.651901	0.73509	-0.938195	-0.976891	0.53406	-0.205528	-0.191433	-0.0205217	2.03002	2.09404	0.508717	0.5332
NG_017159.1	MOSPD2	-0.570244	-0.572426	1.19696	1.2206	-1.54449	0.75892	0.776876	0.832437	-0.870674	-0.952644	-1.67717	-1.7794
NG_017160.1	SLC9A6	-0.500682	-1.19577	-0.582545	-1.41242	-1.20371	0.407097	0.45993	0.428339	1.18648	1.85871	1.33995	2.16664
NG_017163.1	INO80	0.617726	0.66989	-0.906606	-0.881932	-0.235474	0.644206	0.679562	0.688945	1.11451	1.13408	0.750619	0.778283
NG_017196.2	ARMCX4	-0.588659	-0.460395	-1.94675	-1.88137	0.503701	0.982725	1.0541	-0.138697	0.578909	0.62856	-0.164513	-0.0952469
NG_017198.1	ARHGEF28	0.56358	0.56154	0.997523	1.03127	-0.912335	0.614883	0.587405	-0.18534	1.38439	1.43536	-1.53425	-1.66274
NG_021151.1	RAD50	-0.826469	-0.7219	-1.37151	-1.30149	0.0592507	-0.82726	-0.749336	-0.82972	1.87808	1.91048	-0.748837	-0.67957
NG_021169.1	NME1	-0.596186	-0.498283	-0.798244	-0.732733	-0.202918	2.61784	2.67579	-0.954106	0.255905	0.304425	-0.303476	-0.238495
NG_021180.2	SCN8A	-0.790193	-0.723321	-1.33998	-1.29753	-0.807135	1.61104	1.65433	-0.524308	1.78669	1.79026	0.426791	0.455102
NG_021182.1	SIX4	NA	NA	NA	NA	NA	NA	NA	NA	NA	NA	NA	NA
NG_021187.1	TMTC3	NA	NA	NA	NA	NA	NA	NA	NA	NA	NA	NA	NA
NG_021188.1	PIKFYVE	0.225908	0.317833	-0.469239	-0.384952	0.215422	0.38479	0.442487	0.63547	1.28442	1.27016	-0.902136	-0.790531
NG_021193.1	IPW	-0.492038	-0.325611	-1.2599	-1.1938	1.00941	1.87725	2.10524	-0.438249	-0.372079	-0.282721	-0.163833	-0.0449538
NG_021195.1	CDKAL1	2.15422	2.23921	-0.332961	-0.268835	0.456554	-0.136616	-0.0577319	-0.931643	1.14385	1.18977	-1.11224	-1.03771
NG_021196.1	DIP2B	0.33845	0.426959	-1.01198	-0.929755	0.758191	0.883258	0.930788	0.568378	-0.34571	-0.286029	0.956193	0.998659
NG_021208.2	OPRM1	1.3137	NA	-0.178507	NA	NA	1.09488	NA	0.126385	0.41769	NA	0.690769	NA
NG_021212.1	WDR35	NA	NA	NA	NA	NA	NA	NA	NA	NA	NA	NA	NA
NG_021215.1	TRPC5	0.206121	0.362863	-0.165402	-0.0587275	1.32197	-0.31324	-0.178961	-1.7927	1.85065	1.88143	0.718694	0.804189
NG_021227.1	NDUFA1	NA	NA	NA	NA	NA	NA	NA	NA	NA	NA	NA	NA
NG_021242.1	SEMA3E	NA	NA	NA	NA	NA	NA	NA	NA	NA	NA	NA	NA
NG_021244.1	P2RY14	-1.3057	-1.18145	0.793384	0.843433	-0.53755	-0.492264	-0.407606	0.955053	-0.897298	-0.827469	0.58055	0.640386
NG_021249.1	UBA52P2	0.643195	0.714024	0.169011	0.172521	0.286442	1.10896	1.19353	-0.696921	1.52736	1.62439	-0.998751	-1.07703
NG_021253.1	ZFX	0.124418	0.250338	-1.51524	-1.4335	-0.283254	1.27907	1.35239	-1.21738	0.214417	0.267701	1.73943	1.79577
NG_021258.1	PJA1	1.02676	1.11032	-0.947627	-1.09412	-0.478032	1.36558	1.45872	-0.389893	-0.499092	-0.607122	1.2819	1.36476
NG_021259.1	WNK3	NA	NA	NA	NA	NA	NA	NA	NA	NA	NA	NA	NA
NG_021273.1	PPP1R3F	0.372884	NA	-1.17878	NA	NA	0.930928	NA	0.879629	-0.0835634	NA	0.876344	NA
NG_021282.1	NALF2	-0.171356	-0.447803	0.665393	0.933742	1.04434	0.51969	0.709541	-0.612251	1.04574	1.57665	0.139459	0.0365581
NG_021300.1	PTCHD1	-0.0189921	0.108429	-0.278704	-0.202284	1.12067	-0.716928	-0.625085	1.09494	-0.296682	-0.229831	1.64526	1.73256
NG_021302.1	TEAD1	-0.81648	-0.838255	-2.00161	-2.31916	0.565855	1.09036	1.33766	0.23725	1.83133	2.13937	0.677682	0.822149
NG_021308.1	PDS5B	0.188664	0.235886	-2.8062	-2.77513	0.0674216	0.752328	0.772159	0.821544	-0.568727	-0.560429	-1.6244	-1.59705
NG_021316.2	FAM120C	-0.301542	-0.144478	-1.38094	-1.2542	0.30247	-0.153222	-0.0389096	0.959964	0.291971	0.360614	0.209233	0.298862
NG_021320.1	CD99L2	NA	NA	NA	NA	NA	NA	NA	NA	NA	NA	NA	NA
NG_021326.1	BCLAF3	-0.0725932	NA	-0.213287	NA	NA	1.42766	NA	0.787909	0.267812	NA	-0.430883	NA
NG_021335.1	LRCH1	-0.0639761	0.0770151	-0.0152778	0.0689811	-0.341203	0.308698	0.39181	0.632885	0.427333	0.469704	0.321416	0.387265
NG_021338.1	SUFU	-1.44457	-1.2957	-1.26797	-1.16668	0.518162	-0.304192	-0.217613	1.08597	1.55567	1.56428	1.15319	1.18688
NG_021344.2	SLITRK4	-0.789088	NA	-1.90047	NA	NA	0.64419	NA	0.475973	2.15713	NA	0.476965	NA
NG_021353.1	INE1	0.378341	0.426956	-0.519011	-0.488023	0.0420613	0.0686757	0.102668	0.693283	0.246986	0.262181	0.321496	0.344686
NG_021364.1	CFAP251	0.958569	1.41491	-0.135253	-0.390245	-0.655478	0.719018	0.997274	0.575385	0.0535067	-0.098522	0.82085	1.14424
NG_021365.1	NKAIN2	-0.729763	-0.687673	-1.40506	-1.46441	-0.748895	-0.742711	-0.747934	0.715609	1.59393	1.66037	0.716603	0.764486
NG_021367.1	SH3KBP1	NA	NA	NA	NA	NA	NA	NA	NA	NA	NA	NA	NA
NG_021368.1	WDR44	-0.830506	-0.739222	-0.941629	-0.90772	-0.766345	0.175206	0.229036	-0.286337	-0.356363	-0.332993	-1.32353	-1.283
NG_021375.1	DLG2	-0.248699	-0.134943	-0.691866	-0.638367	-0.63467	-0.250069	-0.173533	0.78904	1.96372	2.017	1.11623	1.18395
NG_021386.2	TAB2	0.0916943	0.163234	1.14874	1.17628	0.928734	1.14573	1.19098	-0.187312	1.42272	1.4416	1.27714	1.30748
NG_021387.1	ZDHHC9	0.628767	0.64166	1.14566	1.11142	0.88279	0.846053	0.827342	0.641379	-0.855336	-0.872427	0.368208	0.348884
NG_021388.1	ZNF280C	-0.619715	-0.565988	0.570807	0.607015	-0.684785	0.12121	0.16465	-0.234034	0.244673	0.260498	0.225913	0.257715
NG_021389.1	RPS20P4	-1.16265	-1.12753	-2.09948	-2.10034	-1.7783	0.664559	0.680428	0.35343	1.13149	1.1287	-1.42848	-1.42418
NG_021393.1	TMPO	-0.653912	-0.55515	-1.22692	-1.14831	-0.681238	0.276065	0.336261	-0.683055	1.53638	1.5499	1.09093	1.12413
NG_021394.1	LRP4	-0.941127	-0.942477	0.77229	0.770838	0.651356	1.10478	1.15937	0.501689	1.72906	1.71447	1.16903	1.16805
NG_021399.1	SF1	-0.428438	-0.393409	0.508935	0.498714	-2.12901	0.465836	0.476106	0.0713681	1.112	1.09324	-1.27225	-1.27667
NG_021401.1	SLC4A10	-0.15847	-0.102406	0.294707	0.30185	-1.45306	0.585364	0.61706	0.439904	1.22984	1.22947	0.54872	0.562164
NG_021408.2	EMG1	-0.720873	-0.613416	1.7528	1.77563	-0.511479	0.343301	0.401316	-0.357897	0.238341	0.260703	0.872544	0.909767
NG_021409.1	TRIM32	NA	NA	NA	NA	NA	NA	NA	NA	NA	NA	NA	NA
NG_021423.1	ANAPC15	-0.942866	-0.870318	-0.79884	-0.777473	1.34367	-1.1372	-1.09503	0.196579	0.699086	0.718997	0.224225	0.256292
NG_021426.1	ZBTB38	-0.809409	-0.739379	1.23331	1.19795	-0.647966	1.41608	1.39515	-1.14632	1.53048	1.47755	-0.596108	-0.560725
NG_021431.1	SCML2	0.0576184	-0.170664	0.612638	0.980761	-1.55929	0.279048	0.268467	1.04054	1.06768	1.98818	-0.067534	-0.541236
NG_021468.1	THOC2	1.12842	1.22073	-2.05289	-1.97468	0.868878	-0.337154	-0.252331	-1.05766	1.58293	1.63077	-0.19323	-0.121702
NG_021477.1	GAD1	NA	NA	NA	NA	NA	NA	NA	NA	NA	NA	NA	NA
NG_022926.1	ACVR1B	0.314076	0.3849	-1.98856	-1.93793	0.637133	0.755767	0.80458	-0.567541	1.30139	1.33282	-0.788099	-0.738521
NG_022929.1	PPIP5K1	-0.0263936	NA	-0.980013	NA	NA	-0.02691	NA	0.73168	0.140403	NA	0.917376	NA
NG_022931.1	DGCR8	NA	NA	NA	NA	NA	NA	NA	NA	NA	NA	NA	NA
NG_022933.1	DNAJC19	NA	NA	NA	NA	NA	NA	NA	NA	NA	NA	NA	NA
NG_023033.1	SRC	0.083185	0.0357436	-0.816304	-1.1701	1.25261	1.56093	1.93945	0.185293	1.69356	2.09322	1.03933	1.25119
NG_023038.1	ATG16L1	NA	NA	NA	NA	NA	NA	NA	NA	NA	NA	NA	NA
NG_023039.1	CUX2	0.7744	0.880817	-1.21279	-1.12812	0.959961	1.27536	1.35634	0.465851	1.39467	1.44784	1.29043	1.35577
NG_023044.2	RDX	-1.68257	-1.67859	0.109245	0.118337	0.278542	1.16795	1.22473	-1.48681	-0.0312536	-0.0346158	1.00245	1.0423
NG_023046.1	PHB	-0.301943	-0.264623	-0.414971	-0.400107	-0.409921	1.38868	1.39024	-0.604655	1.62207	1.6069	1.24884	1.2455
NG_023054.2	MAPK1	NA	NA	NA	NA	NA	NA	NA	NA	NA	NA	NA	NA
NG_023055.1	SLC26A5	NA	NA	NA	NA	NA	NA	NA	NA	NA	NA	NA	NA
NG_023193.2	CA8	NA	NA	NA	NA	NA	NA	NA	NA	NA	NA	NA	NA
NG_023206.1	FDX1P1	0.490797	0.584672	-1.13386	-1.06453	-0.37578	1.42767	1.49271	-1.00293	0.351481	0.393923	-0.69363	-0.625382
NG_023212.2	ADAMTS2	-0.43824	-0.384804	-0.900893	-0.914984	0.526552	0.472479	0.501076	-1.93851	1.50965	1.50699	0.166786	0.17087
NG_023225.1	ACAA1	-1.94683	-1.87417	-2.4334	-2.38514	-0.193406	0.854541	0.868554	0.417746	0.989545	0.979706	0.317281	0.32849
NG_023230.1	ATP1B1	NA	NA	NA	NA	NA	NA	NA	NA	NA	NA	NA	NA
NG_023240.1	EWSR1	0.836752	0.824957	-1.65976	-1.79201	-0.0533049	1.09567	1.07124	0.641413	0.359041	0.291034	0.980867	0.944806
NG_023244.1	FOXO1	NA	NA	NA	NA	NA	NA	NA	NA	NA	NA	NA	NA
NG_023250.3	HDAC9	1.30255	1.43349	-0.800917	-0.70672	0.361944	-0.0725739	0.0382256	-0.376422	-0.341583	-0.264219	-0.0333773	0.0602982
NG_023253.1	INPPL1	-1.12904	-0.96877	0.930933	0.996533	-0.879277	-0.482876	-0.370027	-1.84578	1.27479	1.32426	-0.103027	-0.0124489
NG_023255.1	LAMB1	-0.907537	-0.89277	-2.92158	-3.10731	-0.502035	0.255788	0.290486	0.626303	1.85296	1.9343	-0.0435568	-0.0491183
NG_023258.1	MN1	NA	NA	NA	NA	NA	NA	NA	NA	NA	NA	NA	NA
NG_023259.1	NPAS2	-0.839091	-0.800113	-1.72547	-1.7008	0.612835	-0.671351	-0.65175	0.738913	1.20941	1.20084	0.678657	0.684995
NG_023260.1	OGDH	NA	NA	NA	NA	NA	NA	NA	NA	NA	NA	NA	NA
NG_023266.1	PTPRZ1	NA	NA	NA	NA	NA	NA	NA	NA	NA	NA	NA	NA
NG_023267.1	RAD51B	-0.295834	-0.198769	-0.552476	-0.49981	-0.032948	0.59249	0.661339	-0.620911	0.201659	0.244274	1.87675	1.92914
NG_023268.1	RASGRP1	NA	NA	NA	NA	NA	NA	NA	NA	NA	NA	NA	NA
NG_023272.2	RUNX1T1	NA	NA	NA	NA	NA	NA	NA	NA	NA	NA	NA	NA
NG_023287.1	TRIM33	0.559259	0.631361	-1.61493	-1.58484	0.581584	0.592144	0.642825	0.686045	1.14647	1.17811	0.680313	0.720956
NG_023292.1	NSD3	NA	NA	NA	NA	NA	NA	NA	NA	NA	NA	NA	NA
NG_023293.1	PAXIP1	NA	NA	NA	NA	NA	NA	NA	NA	NA	NA	NA	NA
NG_023295.2	ACACA	1.03426	1.12752	-0.618258	-0.577254	-0.25006	-0.0486087	0.0112247	-0.105444	1.77029	1.84065	0.0200016	0.0735635
NG_023299.1	CREB1	-0.411908	-0.24764	0.0204069	0.103034	-1.21638	0.422823	0.527934	-0.579787	-0.126564	-0.0572008	1.44695	1.52884
NG_023302.1	IDH2	NA	NA	NA	NA	NA	NA	NA	NA	NA	NA	NA	NA
NG_023310.1	PLAG1	-1.06918	-1.02736	1.27252	1.28076	-1.00334	1.04943	1.07554	1.38079	0.859225	0.853278	1.51996	1.53704
NG_023312.1	RGS4	0.282318	0.327294	0.0747355	0.00848315	0.340961	0.46726	0.56569	0.459811	-0.775652	-1.17463	0.408692	0.474418
NG_023313.1	SORL1	NA	NA	NA	NA	NA	NA	NA	NA	NA	NA	NA	NA
NG_023322.1	ING3	-1.25923	-1.19538	-0.779817	-0.78334	-1.07162	-0.582806	-0.572558	-0.665121	2.09662	2.00814	-0.754978	-0.751602
NG_023324.1	SLC49A4	-0.0525026	-0.000239	-0.262923	-0.25391	-0.856949	-0.496491	-0.445067	-0.0459535	3.27747	2.9782	0.371852	0.334678
NG_023330.1	SMAD7	-2.08916	NA	-0.653188	NA	NA	-0.989199	NA	-0.583634	0.780307	NA	-1.53213	NA
NG_023340.1	SMO	0.144251	NA	1.34255	NA	NA	0.0925864	NA	0.375099	0.94107	NA	0.0123344	NA
NG_023345.1	THRA	0.719301	0.768991	0.836363	0.863093	0.871704	-1.12572	-1.04788	0.855016	1.19586	1.20996	0.902304	0.930338
NG_023348.2	ZMYM2	-0.118362	-0.075666	1.42962	1.43882	-0.106824	1.1818	1.20248	0.0745681	-1.20096	-1.2512	-0.0071286	-0.0170991
NG_023350.1	PRSS12	0.741551	0.847668	1.14851	1.20631	0.468884	0.884208	0.96425	0.916132	0.760255	0.818059	0.985316	1.05063
NG_023364.1	ALDH7A1P1	0.848872	1.00915	1.01844	1.13339	0.752206	1.48656	1.62007	0.971185	-0.395605	-0.290002	-1.54352	-1.42613
NG_023366.1	MED13L	-0.583172	-0.469229	1.03564	1.08801	-0.660099	-0.62456	-0.533365	1.5077	-0.520849	-0.449975	-1.03102	-0.940678
NG_023371.1	NUP214	0.860916	1.06662	-0.611805	-0.847477	1.18531	1.29766	1.60435	-0.260589	1.55013	1.90351	1.29798	1.59233
NG_023373.1	MTUS1	-0.642123	-0.535732	-1.51782	-1.43514	-0.0633292	0.439843	0.506828	1.58858	0.202407	0.2532	1.58804	1.62897
NG_023375.1	GPD1L	NA	NA	NA	NA	NA	NA	NA	NA	NA	NA	NA	NA
NG_023402.2	JAK1	NA	NA	NA	NA	NA	NA	NA	NA	NA	NA	NA	NA
NG_023414.1	TTC37	0.687802	0.757253	-0.215101	-0.156099	-0.370411	0.53205	0.583865	1.0155	1.39792	1.40799	1.10183	1.13021
NG_023416.1	HPSE2	-1.13716	-1.06835	-1.34526	-1.33481	0.0481056	0.845011	0.906721	-0.574622	0.896197	0.926561	0.14192	0.178897
NG_023421.1	VIPAS39	0.917888	1.00229	-1.75861	-1.69739	-0.978444	1.16544	1.22612	-0.705661	0.986137	1.03118	1.17963	1.23459
NG_023427.1	MEF2C	0.564511	0.611908	-1.11461	-1.0758	-0.84026	0.69169	0.715913	0.745216	1.43847	1.427	1.58754	1.5838
NG_023428.1	ODCP	1.18345	1.27798	0.590956	0.636094	-0.478617	0.701426	0.766247	0.196053	-1.73287	-1.69585	0.26542	0.315684
NG_023441.1	MSRB3	0.292447	0.444016	1.36698	1.39529	0.839505	0.924018	1.00614	0.676657	0.302312	0.371657	0.697168	0.767219
NG_023443.2	EYS	NA	-0.128591	NA	0.00889208	-0.475874	NA	-0.166843	NA	NA	1.27967	NA	0.526619
NG_023544.1	CTNND2	0.00795216	0.0738083	0.0989947	0.12443	-0.668809	1.03937	1.07427	0.0602354	1.35651	1.36523	-0.327135	-0.293904
NG_027520.1	PABPC1	NA	1.67745	NA	-0.741904	1.64818	NA	1.84626	NA	NA	0.305038	NA	1.44985
NG_027527.1	SETBP1	-0.427924	NA	0.0617834	NA	NA	-0.782529	NA	-0.0151495	2.4201	NA	0.336305	NA
NG_027529.1	COG4	1.42981	1.50947	-2.00286	-1.95826	-0.726881	1.56011	1.6183	-0.542906	-0.156143	-0.127595	1.18755	1.21933
NG_027535.1	IGSF21	0.762669	0.852352	1.18917	1.23175	-0.563739	1.42556	1.48028	-0.807451	1.43409	1.46535	0.452332	0.512061
NG_027548.1	NUCKS1	0.519497	0.597608	-0.44192	-0.413632	0.728067	0.978303	1.0349	0.473207	-1.96908	-1.9625	-1.94523	-1.92614
NG_027669.1	UBR4	1.0727	1.10496	-1.2082	-1.17534	1.15526	-0.422059	-0.388449	1.27183	-0.160531	-0.147868	1.40909	1.40925
NG_027670.1	THSD7A	NA	NA	NA	NA	NA	NA	NA	NA	NA	NA	NA	NA
NG_027674.1	DDIT3	NA	NA	NA	NA	NA	NA	NA	NA	NA	NA	NA	NA
NG_027680.1	RTF1	-0.134245	-0.235404	0.527191	0.616975	1.09206	-0.457819	-0.687225	0.461416	0.565567	0.662277	0.406507	0.458909
NG_027683.1	SEMA4A	1.44357	1.52831	-1.00557	-0.932195	-0.332691	1.80705	1.86554	1.50515	0.603983	0.645732	1.55184	1.59007
NG_027690.1	PCM1	NA	NA	NA	NA	NA	NA	NA	NA	NA	NA	NA	NA
NG_027693.2	PDE4DIP	NA	NA	NA	NA	NA	NA	NA	NA	NA	NA	NA	NA
NG_027696.1	COQ9	0.351545	NA	-1.85799	NA	NA	0.580312	NA	0.901582	0.220688	NA	-1.2536	NA
NG_027698.1	USB1	NA	NA	NA	NA	NA	NA	NA	NA	NA	NA	NA	NA
NG_027701.1	RARA	-0.458774	-0.449444	-0.657884	-0.687165	-0.770842	0.206195	0.21118	1.68302	0.734958	0.731904	-0.316452	-0.333249
NG_027721.2	TGFB2	0.131882	NA	-1.06294	NA	NA	0.168712	NA	0.62471	-0.747073	NA	0.346884	NA
NG_027724.1	MIPOL1	-0.334283	-0.270824	-1.72757	-1.76615	-0.11427	-0.512766	-0.489539	-0.256381	1.41394	1.48005	0.80513	0.865088
NG_027725.1	FBXO33	-0.710799	-0.337869	-0.595086	-0.411034	-1.91767	0.53801	0.794371	0.989985	2.13242	2.27671	0.844856	1.04874
NG_027726.1	NEXMIF	-0.379957	-0.230082	0.253125	0.317677	-0.169176	-2.31824	-2.20274	0.109405	1.27001	1.32032	0.203502	0.277706
NG_027731.2	RGS5	NA	NA	NA	NA	NA	NA	NA	NA	NA	NA	NA	NA
NG_027734.1	ROBO2	0.51208	0.563672	-0.162473	-0.155826	1.76888	1.18307	1.17778	-0.61898	-1.52021	-1.50177	-0.873808	-0.847805
NG_027747.1	POLR2A	0.0993477	0.142587	0.153186	0.167172	-2.00993	0.537365	0.593696	0.453881	0.581993	0.621456	0.204196	0.225731
NG_027748.1	SPTAN1	0.0669913	0.120756	-2.16893	-2.13477	0.336044	0.499229	0.536076	0.20329	0.884892	0.90349	0.388418	0.416819
NG_027782.1	VPS13C	-0.358794	-0.303642	1.60458	1.90924	-0.333847	0.75289	0.955901	0.49437	0.491651	0.583429	1.11169	1.34136
NG_027801.1	TMEM203	NA	NA	NA	NA	NA	NA	NA	NA	NA	NA	NA	NA
NG_027811.1	SDCCAG8	-0.556546	-0.432698	-0.6478	-0.562978	-0.465654	1.5718	1.64884	0.530895	-0.306154	-0.23483	2.00722	2.05664
NG_027813.1	KMT2A	0.507045	0.591053	-1.36988	-1.34079	0.809867	-1.06975	-1.0233	0.175842	-1.42736	-1.40608	-1.692	-1.66078
NG_027814.2	SATB1	-0.166674	NA	-0.362874	NA	NA	0.245509	NA	0.380536	1.82377	NA	0.718102	NA
NG_027817.1	VDAC1	-0.134642	-0.268573	-0.373161	-0.605858	1.64181	-0.226635	-0.407394	-0.20711	0.244964	0.183649	-0.222185	-0.40794
NG_027818.1	MLLT10	0.0368376	0.0900175	-1.80211	-1.94934	-1.33274	0.557543	0.628038	-1.30898	1.16988	1.26842	0.200263	0.229026
NG_027819.1	CCDC6	-0.245166	-0.0792575	-0.741352	-0.618892	0.0483397	-0.621184	-0.482054	-0.47472	0.67199	0.796074	0.0487343	0.180891
NG_027821.1	TFG	NA	NA	NA	NA	NA	NA	NA	NA	NA	NA	NA	NA
NG_027822.1	AGGF1	-1.06844	-1.02457	-1.09421	-1.08569	-1.1037	-0.570087	-0.542154	1.35488	-1.01144	-1.00777	1.29316	1.32915
NG_027823.1	PLEKHA1	0.271809	0.37451	-1.24756	-1.21905	0.329272	0.884682	0.980513	0.412701	0.657654	0.676433	0.393676	0.420641
NG_027827.1	KMT2D	0.448725	0.464045	-1.4884	-1.52216	-1.58989	0.627946	0.622006	0.541808	1.43784	1.42645	0.635749	0.626811
NG_027833.1	AOPEP	0.959864	NA	-1.50049	NA	NA	1.42537	NA	0.458087	-0.0439553	NA	1.23057	NA
NG_027868.1	ASXL1	NA	NA	NA	NA	NA	NA	NA	NA	NA	NA	NA	NA
NG_027904.2	GNAQ	NA	NA	NA	NA	NA	NA	NA	NA	NA	NA	NA	NA
NG_027934.1	PSENEN	NA	NA	NA	NA	NA	NA	NA	NA	NA	NA	NA	NA
NG_027935.1	NCSTN	-0.706983	-0.637998	-0.787249	-0.742122	-1.16389	1.61253	1.64614	1.0178	-0.385447	-0.348438	1.56213	1.59066
NG_027957.1	PDE4D	1.12152	1.21042	-1.27471	-1.23351	-0.405657	-0.193863	-0.136069	-0.252789	2.8054	2.7881	-0.234842	-0.196269
NG_027960.1	ARHGEF12	1.48999	1.55308	-1.24396	-1.19069	1.10754	0.156004	0.211952	-1.18722	-0.587252	-0.546006	1.95529	1.98892
NG_027971.1	FAM219A	-0.916293	-0.897689	-2.20252	-2.20529	0.973217	0.489741	0.477165	-0.649512	1.57376	1.53472	0.879587	0.855659
NG_027982.1	NEK1	-0.718526	-0.687064	0.920271	0.936586	-0.300426	0.22837	0.248226	-1.00427	-0.219344	-0.230474	1.14653	1.17166
NG_027991.1	FAP	NA	NA	NA	NA	NA	NA	NA	NA	NA	NA	NA	NA
NG_027992.2	RRM1	NA	NA	NA	NA	NA	NA	NA	NA	NA	NA	NA	NA
NG_027994.1	TST	0.48065	0.487146	0.765011	0.723816	-1.39712	-0.346717	-0.347007	0.362731	1.31233	1.25187	0.0843124	0.0627768
NG_028007.1	MAP4K3	NA	NA	NA	NA	NA	NA	NA	NA	NA	NA	NA	NA
NG_028012.1	DOCK3	-0.239739	-0.147559	-1.49516	-1.39878	-0.457536	1.01855	1.05676	0.758749	1.53642	1.5329	0.743011	0.77499
NG_028023.1	CHUK	-0.0763721	-0.0509984	0.249308	0.235408	-1.43797	0.495214	0.500145	-1.44455	1.28261	1.26558	0.751398	0.744507
NG_028030.1	PDZD7	NA	NA	NA	NA	NA	NA	NA	NA	NA	NA	NA	NA
NG_028036.1	PTPN14	-0.218325	NA	-0.83565	NA	NA	0.969315	NA	0.127598	1.67621	NA	-0.0404622	NA
NG_028041.1	AK3	0.839156	0.895786	-1.23143	-1.19701	1.13818	-1.35291	-1.30115	-0.835813	-0.243157	-0.228183	0.364754	0.386128
NG_028043.1	KIF16B	0.599631	0.683554	-3.03051	-3.0281	1.47858	0.342746	0.404601	1.62337	-0.0366773	0.00575543	-0.445739	-0.394037
NG_028060.1	DOCK4	0.0580072	0.13178	-1.70626	-1.77958	0.212308	0.638688	0.720846	0.414357	0.95494	1.02485	0.573928	0.635814
NG_028077.1	SHROOM3	NA	NA	NA	NA	NA	NA	NA	NA	NA	NA	NA	NA
NG_028079.2	CFAP57	-0.298645	-0.2407	-1.51207	-1.51949	-0.52932	0.418702	0.462853	-0.31391	0.647032	0.670651	-0.713007	-0.700611
NG_028094.1	ZNF592	NA	NA	NA	NA	NA	NA	NA	NA	NA	NA	NA	NA
NG_028095.1	GPR22	-0.743955	NA	-2.58017	NA	NA	0.673599	NA	0.63622	1.14057	NA	0.296074	NA
NG_028105.1	FXR2	-0.809047	-0.751064	-0.940628	-0.90485	-1.1249	1.37285	1.36643	-0.559689	1.80082	1.76841	0.20738	0.219979
NG_028110.1	KCTD7	NA	NA	NA	NA	NA	NA	NA	NA	NA	NA	NA	NA
NG_028118.1	ARRB1	NA	NA	NA	NA	NA	NA	NA	NA	NA	NA	NA	NA
NG_028133.1	PIGV	NA	NA	NA	NA	NA	NA	NA	NA	NA	NA	NA	NA
NG_028144.1	MDH1	0.326015	0.513363	-2.54185	NA	1.20876	0.390852	0.533225	0.585233	2.25898	NA	0.944423	NA
NG_028156.1	MAB21L1	-0.376744	-0.250937	-1.38487	-1.2745	1.00498	1.23172	1.29964	1.03179	1.80666	1.82485	0.239676	0.312598
NG_028168.1	PLCB1	NA	NA	NA	NA	NA	NA	NA	NA	NA	NA	NA	NA
NG_028171.1	SOX17	-1.95242	-1.85649	1.01941	1.10263	-0.938168	0.981952	1.08843	-0.672595	1.16177	1.23327	-0.560304	-0.510592
NG_028191.1	TET2	-0.293356	-0.225621	0.496017	0.508856	-0.604779	-0.601891	-0.560046	1.05348	1.96806	1.95625	-0.316898	-0.289757
NG_028196.1	SHMT1P1	0.317988	0.412646	-1.98945	-1.85137	-0.0774695	0.669956	0.725026	0.545775	1.20915	1.22051	0.553509	0.601944
NG_028200.1	SOBP	0.263787	0.348029	0.333643	0.376572	1.24024	0.296028	0.351805	0.245662	0.849842	0.884348	0.659417	0.707584
NG_028216.2	ANO10	-0.230026	-0.124782	-0.579557	-0.529638	1.41133	1.5974	1.71433	-1.32678	-0.605299	-0.56439	0.344542	0.424432
NG_028217.1	SMOC1	-0.55972	-0.464658	-0.303869	-0.247267	-0.427798	-0.585023	-0.510994	-0.615619	0.31541	0.359418	-0.756055	-0.690905
NG_028219.1	ZNF513	1.2354	1.33957	-0.831083	-0.796602	-0.991947	1.52953	1.62406	-0.109943	-0.298335	-0.272441	-0.494257	-0.458299
NG_028220.1	ANO6	0.475147	0.568026	0.781181	0.840313	0.875331	1.06882	1.14255	0.0320187	0.586347	0.637954	0.292311	0.353038
NG_028242.1	ABL2	-1.24229	-1.13312	1.28157	1.30988	-0.655069	0.566302	0.627104	0.632184	1.10961	1.12947	-3.14961	-3.0636
NG_028243.1	FOXP1	-1.04892	-0.958344	-1.10759	-1.06925	-0.554728	0.823602	0.861508	-1.00611	1.47726	1.47935	1.91817	1.93146
NG_028246.1	PBX1	-0.549789	-0.41601	-0.684884	-0.598476	0.974964	-0.928031	-0.821346	-0.452356	2.2417	2.35349	-1.18028	-1.09461
NG_028248.1	ARNT	NA	NA	NA	NA	NA	NA	NA	NA	NA	NA	NA	NA
NG_028249.1	KDSR	0.483326	0.543041	-0.297182	-0.26726	0.471783	0.646746	0.687616	0.650504	-0.296283	-0.271885	-0.859862	-0.826549
NG_028252.1	ORC4	NA	NA	NA	NA	NA	NA	NA	NA	NA	NA	NA	NA
NG_028265.1		-2.33853	-2.32316	0.513147	0.534385	0.31325	0.264798	0.297069	-1.66269	1.24443	1.26952	-1.27004	-1.28016
NG_028280.1	SORT1	1.03836	1.14492	-0.935979	-1.08133	-0.0456588	1.44161	1.56816	-0.570214	1.28974	1.38093	-0.904138	-1.04167
NG_028282.1	SPTLC2	NA	NA	NA	NA	NA	NA	NA	NA	NA	NA	NA	NA
NG_028283.2	POLR1C	0.519317	0.516099	-1.41242	-1.41731	-1.25325	1.03389	1.00356	0.909639	1.30364	1.25273	0.831677	0.7971
NG_028336.1	TECR	0.544083	0.610154	-1.26885	-1.74712	-0.662736	0.900227	1.04926	-0.914727	0.971689	1.12874	0.639286	0.709721
NG_028348.1	PTP4A2P2	-0.416134	-0.342143	1.09243	1.11892	0.722322	-0.634708	-0.584416	0.928063	0.894798	0.915028	0.389193	0.423924
NG_028349.1	NUBPL	-0.38187	-0.338176	0.00772832	0.0214217	0.644029	1.05352	1.08982	0.380927	1.06735	1.0857	-0.173819	-0.157979
NG_028352.1	COG6	0.93714	1.04093	-0.503665	-0.395671	-0.585015	0.459403	0.546597	0.0731912	1.59538	1.59974	-0.642008	-0.520585
NG_028908.1	POLR1D	0.355168	0.422872	-1.91084	-1.8775	0.405792	-1.52996	-1.47057	0.672933	1.1503	1.17641	0.46793	0.505467
NG_028922.1	SHOC2	0.825518	1.07466	-0.523107	-0.785526	0.898656	0.125267	0.104293	-0.36646	0.254518	0.254742	0.902862	1.14128
NG_028924.1	CHIC2	1.3	1.43201	0.0149697	0.0976133	0.760775	0.0491461	0.155032	-0.001307	-0.181975	-0.109114	0.643757	0.726303
NG_028942.1	PICALM	-0.409829	-0.399612	-1.13543	-1.21654	0.859813	1.00553	1.09303	0.657056	1.29665	1.37701	0.640744	0.688115
NG_028966.1	IL11RA	NA	NA	NA	NA	NA	NA	NA	NA	NA	NA	NA	NA
NG_028982.3	TCF20	-0.480369	-0.394615	-1.67417	-1.61866	0.0396052	1.67851	1.71463	-0.540904	0.518584	0.54086	-0.478354	-0.431242
NG_028983.1	GMEB1	NA	NA	NA	NA	NA	NA	NA	NA	NA	NA	NA	NA
NG_028987.1	VEZT	NA	NA	NA	NA	NA	NA	NA	NA	NA	NA	NA	NA
NG_029003.1	PRKCB	-1.43696	-1.29943	-2.00615	-1.89614	0.818829	0.783345	0.840095	0.273647	0.842063	0.874162	0.246059	0.305313
NG_029011.1	HNRNPC	0.449427	0.478568	0.934607	1.1216	0.0662499	-0.432984	-0.753432	0.935582	-0.0467081	-0.233666	0.858482	1.0206
NG_029013.3	RARB	NA	NA	NA	NA	NA	NA	NA	NA	NA	NA	NA	NA
NG_029014.1	NCOA1	-1.121	-1.01186	0.507924	0.585968	-0.232561	1.0593	1.22351	-0.0531499	-2.69984	-2.81453	0.496577	0.588549
NG_029017.2	ATAD2B	-0.50662	-0.396585	-1.91054	-1.81618	0.485624	-0.12132	-0.0444784	1.13181	1.57843	1.59926	1.1298	1.17189
NG_029019.1	CEBPB	NA	NA	NA	NA	NA	NA	NA	NA	NA	NA	NA	NA
NG_029020.1	HMGA1	0.715976	0.781702	1.15355	1.18711	-0.87101	-0.591186	-0.545835	1.27566	1.24919	1.27677	0.868189	0.906059
NG_029028.1	CKS1B	1.39739	1.47251	1.23838	1.28001	-0.981492	1.48675	1.54468	-1.02318	1.72262	1.7746	-0.685401	-0.704547
NG_029036.1	PML	NA	NA	NA	NA	NA	NA	NA	NA	NA	NA	NA	NA
NG_029038.1	PDE4B	-0.0881479	0.00968849	2.00479	2.05793	1.55064	2.07738	2.15516	0.296407	0.937749	0.978352	-0.220056	-0.167676
NG_029040.2	CDC25B	-2.07274	-1.81079	1.0935	1.21327	0.86862	-0.558636	-0.38564	-1.17758	0.408163	0.506304	-0.768762	-0.629719
NG_029053.2	MAPK8	0.190275	0.238171	-0.799592	-0.820914	0.911474	1.86284	1.96003	1.29592	2.06361	2.13011	0.768763	0.803126
NG_029061.2	NUMB	1.06891	1.16156	-0.148813	-0.0808975	0.00620969	-0.73127	-0.635103	-1.28863	0.512043	0.556781	-1.05391	-0.960672
NG_029065.1	CREM	NA	NA	NA	NA	NA	NA	NA	NA	NA	NA	NA	NA
NG_029067.1	FGF2	0.964556	1.5033	0.587583	0.830214	-0.209499	0.426378	0.581209	0.117282	0.247648	0.258229	0.17034	0.144237
NG_029078.1	CTNND1	NA	NA	NA	NA	NA	NA	NA	NA	NA	NA	NA	NA
NG_029082.1	CATSPERE	0.0858066	0.170259	-0.893565	-0.88752	-0.893635	0.205494	0.272413	-0.504925	0.500879	0.558562	-0.254708	-0.217614
NG_029091.1	SZT2	-0.0812971	NA	-0.131392	NA	NA	1.05106	NA	0.990004	-1.02888	NA	0.610972	NA
NG_029095.1	BCCIP	NA	NA	NA	NA	NA	NA	NA	NA	NA	NA	NA	NA
NG_029099.1	DLG1	0.638347	0.668089	-1.80878	-1.82634	0.518693	0.321246	0.324764	0.770202	1.36894	1.35428	0.859675	0.855214
NG_029101.1	GABBR1	NA	NA	NA	NA	NA	NA	NA	NA	NA	NA	NA	NA
NG_029103.1	HNRNPD	0.110353	NA	0.405377	NA	NA	0.350582	NA	0.112078	0.582421	NA	0.16054	NA
NG_029105.1	IL1RAP	-0.414615	-0.265569	0.672137	0.73096	0.0273061	0.0584806	0.157806	0.577142	1.11189	1.14672	-0.581814	-0.47891
NG_029107.2	ITGA3	0.727724	0.900203	-1.28666	-1.74175	1.0711	1.09917	1.35936	-0.683971	0.853487	1.02535	-0.987781	-1.35037
NG_029108.1	MEIS2	0.355582	0.503181	-1.63614	-1.57335	1.0675	0.309459	0.417391	-1.35113	0.99112	1.07238	1.02248	1.1229
NG_029111.1	MYLK	NA	NA	NA	NA	NA	NA	NA	NA	NA	NA	NA	NA
NG_029114.1	PFN2	0.0821216	0.141624	0.575326	0.580165	-0.0051738	0.669133	0.692289	0.536693	0.827875	0.821467	-0.4334	-0.415272
NG_029116.1	PTPN2	NA	NA	NA	NA	NA	NA	NA	NA	NA	NA	NA	NA
NG_029119.1	SEMA6D	NA	NA	NA	NA	NA	NA	NA	NA	NA	NA	NA	NA
NG_029120.1	SORCS1	-0.0958653	0.0521635	0.212091	0.275953	-0.587161	0.757739	0.870333	-0.140741	0.522725	0.578759	0.0804155	0.151175
NG_029123.1	AKAP7	0.677002	0.760965	1.01224	1.04419	0.457233	1.29285	1.33702	-0.876212	1.2054	1.22508	0.849669	0.890252
NG_029143.1	MAP2K5	0.267798	0.303154	-1.70497	-1.82042	-0.908192	1.2529	1.31499	0.597707	-0.50652	-0.560317	0.599232	0.620596
NG_029147.1	NFATC3	0.853192	0.925601	-1.94412	-1.83482	-0.611693	1.06799	1.10782	-1.29498	0.881268	0.898657	0.389914	0.434848
NG_029153.1	SP3	-0.352748	-0.599514	-0.506979	-0.858547	-0.270018	-0.108397	-0.27602	-0.160496	1.38665	1.83234	1.0915	1.42363
NG_029160.1	GART	0.858936	0.930283	-1.53782	-1.47989	1.18375	1.45944	1.49982	-0.292105	-0.18177	-0.141208	-0.201775	-0.149845
NG_029165.1	CTNNBIP1	NA	NA	NA	NA	NA	NA	NA	NA	NA	NA	NA	NA
NG_029166.1	SOX4	NA	NA	NA	NA	NA	NA	NA	NA	NA	NA	NA	NA
NG_029171.1	NRDC	NA	NA	NA	NA	NA	NA	NA	NA	NA	NA	NA	NA
NG_029180.1	AHCYL2	NA	NA	NA	NA	NA	NA	NA	NA	NA	NA	NA	NA
NG_029182.1	AHCYL1	NA	NA	NA	NA	NA	NA	NA	NA	NA	NA	NA	NA
NG_029184.1	MTFMT	0.25303	0.301361	-1.40687	-1.3433	0.384173	0.518768	0.531656	0.432335	1.57744	1.52673	0.439192	0.441925
NG_029185.1	MTHFD1L	1.63983	1.67537	-0.514579	-0.48417	0.557289	-1.14613	-1.09251	-1.36138	-1.14499	-1.11068	0.968704	0.977302
NG_029186.1	CALD1	0.216908	0.357894	0.908658	1.00844	0.738662	-0.224387	-0.127735	-0.151846	1.08069	1.17363	-1.64935	-1.59833
NG_029188.1	CASP9	NA	NA	NA	NA	NA	NA	NA	NA	NA	NA	NA	NA
NG_029189.1	CCNT2	0.675835	0.744266	-1.69069	-1.76064	-1.15572	1.04591	1.11075	0.974975	-0.184364	-0.196374	0.96395	1.01089
NG_029191.3	DGKH	0.560494	0.695736	-0.362233	-0.305338	-0.202314	-0.691883	-0.621925	1.17331	1.13614	1.19321	0.870754	0.946292
NG_029218.1	HTR7	-0.527413	-0.507884	-1.50214	-1.53559	-1.22531	1.81464	1.84314	-0.783375	0.0789496	0.0601278	-0.646152	-0.662652
NG_029220.1	ILF3	NA	NA	NA	NA	NA	NA	NA	NA	NA	NA	NA	NA
NG_029221.1	LIG3	0.364311	0.417329	-0.530049	-0.503579	0.183206	0.999465	1.03606	-0.972898	1.21417	1.23579	-0.26688	-0.237299
NG_029223.1	MYL6	NA	NA	NA	NA	NA	NA	NA	NA	NA	NA	NA	NA
NG_029225.1	NEK11	0.506723	0.606572	-1.59058	-1.48468	1.2686	1.56885	1.62309	0.515256	1.37553	1.40841	0.70605	0.76597
NG_029228.1	OS9	0.094578	0.159948	-1.26074	-1.14958	-1.30077	0.489352	0.508216	0.56228	0.814768	0.815786	0.453759	0.481607
NG_029233.1	PPP2R2C	-0.283498	-0.389224	-1.4892	-1.87583	0.656912	0.829002	0.954555	0.663954	0.98099	1.11987	-0.393666	-0.542315
NG_029234.1	PPP2R3A	-0.500858	-0.450671	0.878259	0.953599	-0.625928	0.525622	0.600416	0.257582	1.24018	1.33017	-1.23081	-1.3352
NG_029236.1	RGS6	NA	NA	NA	NA	NA	NA	NA	NA	NA	NA	NA	NA
NG_029240.1	TIAL1	-1.57288	-1.58432	0.130006	0.0528636	-2.41512	-0.129514	-0.174764	-0.265437	1.56591	1.50093	-0.0077028	-0.0736405
NG_029241.1	USF2	0.293074	0.359225	-1.11462	-1.2239	0.956287	0.152517	0.18039	0.684813	1.16952	1.27339	0.682261	0.750283
NG_029243.1	MTHFS	-0.904072	-0.814046	1.56838	1.61587	1.26309	0.732085	0.79534	0.0304227	-0.0813241	-0.0363041	-0.282816	-0.226404
NG_029244.2	SP8	NA	NA	NA	NA	NA	NA	NA	NA	NA	NA	NA	NA
NG_029246.1	RORA	0.882093	1.1629	-1.42304	-1.42043	1.09145	-0.151257	-0.0140363	0.548434	-0.292579	-0.22285	-1.1701	-1.13647
NG_029321.1	CABP1	0.226467	0.417418	-2.4313	-2.14615	0.770903	0.33922	0.478179	0.199576	1.18953	1.23655	-0.208466	-0.052846
NG_029322.2	DST	0.39306	0.462445	0.908419	0.934792	-1.50083	0.726413	0.768836	0.705902	0.852841	0.871246	0.805464	0.836814
NG_029334.1	GATA2	-1.42833	-1.27582	-0.52318	-0.423874	0.0810445	0.0431915	0.169002	-1.45929	1.32112	1.42487	-1.40694	-1.30813
NG_029358.2	PPIP5K1P1	0.937349	1.00169	-0.760952	-0.723217	1.38372	1.47568	1.51992	1.42513	-0.157286	-0.128297	1.3864	1.41803
NG_029365.2	CHN2	0.481663	0.528934	0.932934	0.945493	0.679396	0.579623	0.604797	0.900105	1.15695	1.16524	0.901545	0.918147
NG_029370.1	PTPA	NA	NA	NA	NA	NA	NA	NA	NA	NA	NA	NA	NA
NG_029372.1	BACE1	0.196655	0.195474	0.406385	0.479574	0.616722	0.51757	0.665521	0.128642	0.758954	1.01186	0.479627	0.595643
NG_029373.1	MAP3K20	-0.39375	-0.253435	1.43975	1.50101	0.241179	-0.914533	-0.80909	-0.527998	1.07486	1.1277	0.458153	0.535295
NG_029374.1	RNF216	0.475708	0.553025	-1.74192	-1.64512	0.429916	0.813996	0.860371	0.775348	0.78488	0.809452	0.139619	0.191922
NG_029392.1	TXNRD1	-0.493885	-0.400477	0.169103	0.213032	-0.216501	1.32653	1.37385	1.55345	-0.638539	-0.594707	-1.04985	-0.989308
NG_029395.1	ADRA1A	-0.204019	-0.236639	1.97156	2.26723	-0.37616	0.290078	0.318162	0.469407	1.34418	1.52374	0.869387	0.981869
NG_029406.1	ATRN	0.459814	0.408526	-1.58177	-1.40382	-0.255228	-0.657511	-0.588071	-0.803604	0.864315	0.696281	-0.0876204	-0.109312
NG_029407.1	CAMK2B	0.210366	0.26504	-2.25398	-2.40263	0.344482	0.651794	0.717768	0.304052	0.78901	0.847134	0.209006	0.235982
NG_029408.1	CAMK2G	NA	NA	NA	NA	NA	NA	NA	NA	NA	NA	NA	NA
NG_029409.1	CAMKK2	NA	NA	NA	NA	NA	NA	NA	NA	NA	NA	NA	NA
NG_029432.1	OSBPL1A	0.952255	1.02172	0.763858	0.795655	-1.07797	-0.875861	-0.842933	1.06116	-0.613052	-0.599135	1.27847	1.3187
NG_029444.2	PAM	NA	NA	NA	NA	NA	NA	NA	NA	NA	NA	NA	NA
NG_029445.1	PCSK5	-0.589787	-0.453458	1.38938	1.49426	-0.416569	-0.631132	-0.532556	-1.11977	2.05703	2.16011	0.904582	1.00975
NG_029450.1	DENND2B	NA	NA	NA	NA	NA	NA	NA	NA	NA	NA	NA	NA
NG_029453.2	STAU1	1.17296	1.24746	1.2107	1.2538	-0.821375	1.88249	1.92946	-0.494465	1.76484	1.79889	-0.723991	-0.667823
NG_029458.1	CXADR	NA	NA	NA	NA	NA	NA	NA	NA	NA	NA	NA	NA
NG_029462.1	MADD	0.116913	0.14194	0.736748	0.726246	0.715177	0.870007	0.878668	-1.7762	-1.13102	-1.17219	0.772232	0.767142
NG_029463.1	MDFIC	NA	NA	NA	NA	NA	NA	NA	NA	NA	NA	NA	NA
NG_029465.2	DNMT3A	0.134969	0.240387	-0.56299	-0.498903	0.0675796	0.489289	0.56	0.160591	1.45889	1.48547	0.323362	0.380824
NG_029466.1	MIR4453HG	-0.265398	-0.200105	-2.54226	-2.54213	-2.08423	0.275627	0.313675	0.217298	1.7212	1.73486	0.918631	0.944182
NG_029467.1	PTK2	0.819595	0.868038	-1.2402	-1.18099	0.977891	-0.512591	-0.458506	0.99107	1.37026	1.37143	0.945402	0.964811
NG_029468.1	SMARCD3	0.783085	0.827484	0.913392	0.931521	-0.946411	0.922337	0.950267	0.836463	1.05645	1.06967	-0.982299	-0.959683
NG_029473.1	HSPA8	0.4999	0.516639	-1.48631	-1.47223	0.734344	0.846113	0.848529	-1.39094	1.00711	0.993876	0.845084	0.839118
NG_029474.1	PANK1	NA	NA	NA	NA	NA	NA	NA	NA	NA	NA	NA	NA
NG_029475.1	GABPB1	NA	NA	NA	NA	NA	NA	NA	NA	NA	NA	NA	NA
NG_029476.2	CUX1	2.7935	2.8895	-1.13183	-1.05279	0.138862	-0.562577	-0.46365	-0.631974	-0.163316	-0.0968304	-0.302295	-0.22033
NG_029484.1	ARID4B	-0.689427	-0.609419	-1.16742	-1.12968	0.490693	-1.25742	-1.20646	1.23213	-0.221901	-0.182154	-0.881943	-0.837149
NG_029485.1	ATP2B1	-0.0139938	0.068795	-2.55681	-2.51979	0.471689	0.410885	0.471012	0.621469	1.10127	1.13742	0.744974	0.792684
NG_029491.2	CDH11	-0.365107	-0.215342	-0.074444	0.0131286	-0.34037	-0.893952	-0.784034	-1.11939	0.933664	1.01271	-0.791218	-0.698498
NG_029492.1	CERT1	NA	NA	NA	NA	NA	NA	NA	NA	NA	NA	NA	NA
NG_029493.1	CSPG5	NA	NA	NA	NA	NA	NA	NA	NA	NA	NA	NA	NA
NG_029494.1	DGKB	-0.117696	-0.0781049	-1.01776	-0.976997	0.924218	-0.523248	-0.489748	1.43438	0.14114	0.115742	-0.58298	-0.558789
NG_029498.1	ENPP2	0.776714	0.951542	-0.519067	-0.876094	1.37665	-0.131429	-0.326578	-0.462572	0.439993	0.442882	1.05768	1.30761
NG_029499.1	ENSA	NA	NA	NA	NA	NA	NA	NA	NA	NA	NA	NA	NA
NG_029502.1	GAS7	NA	NA	NA	NA	NA	NA	NA	NA	NA	NA	NA	NA
NG_029503.1	GPBP1	NA	NA	NA	NA	NA	NA	NA	NA	NA	NA	NA	NA
NG_029504.1	ITSN1	0.698926	0.791739	-1.51762	-1.48588	0.729524	-1.42641	-1.38796	0.670882	1.1441	1.19293	0.821206	0.877718
NG_029510.1	PTK2B	NA	NA	NA	NA	NA	NA	NA	NA	NA	NA	NA	NA
NG_029516.1	ITSN2	0.534277	0.624749	-0.776676	-0.677598	0.685533	0.939144	0.987172	0.739464	0.75959	0.785908	0.429817	0.483139
NG_029518.1	SESN1	NA	NA	NA	NA	NA	NA	NA	NA	NA	NA	NA	NA
NG_029520.1	SRPK1	-0.637094	-0.53872	0.569764	0.611165	-0.0181566	0.736917	0.808785	0.228949	1.25714	1.28874	0.25689	0.30485
NG_029523.1	TAX1BP1	1.3888	1.47619	-1.26929	-1.36648	-0.271131	-0.393245	-0.424944	-0.737926	1.54958	1.61173	1.4596	1.52576
NG_029532.1	GRM8	0.176571	0.322821	-0.447665	-0.367026	0.23967	-0.683425	-0.582369	1.12313	2.0111	2.1001	-1.05063	-0.967825
NG_029536.1	DMTF1	NA	NA	NA	NA	NA	NA	NA	NA	NA	NA	NA	NA
NG_029537.1	PHACTR3	-0.2525	-0.145661	-1.30219	-1.2452	-0.0400585	0.933057	1.01258	0.0575532	-0.665069	-0.61281	1.75581	1.83347
NG_029542.1	GFPT1	NA	NA	NA	NA	NA	NA	NA	NA	NA	NA	NA	NA
NG_029545.1	TIMP3	0.172843	0.293814	-1.62038	-1.53246	0.239562	0.998039	1.08732	-0.876815	-0.779294	-0.70594	1.0297	1.10358
NG_029550.1	MBD2	0.137614	0.211557	0.519495	0.554977	0.20325	-0.119068	-0.07035	-0.0005856	0.664722	0.692984	-0.200561	-0.160556
NG_029553.1	DNAJB2	0.718903	0.839849	-0.817556	-1.1282	-1.18773	0.760041	0.874851	0.95811	-0.32854	-0.515918	0.912141	1.05819
NG_029558.1	RTN1	-0.77154	-0.696205	-0.732217	-0.685091	-0.818302	-0.659028	-0.602661	1.20179	0.968997	0.996941	1.13496	1.17027
NG_029559.1	CHRD	-0.31255	NA	-0.547718	NA	NA	-0.81507	NA	1.33203	1.02919	NA	0.818351	NA
NG_029560.1	AQP4	NA	0.127655	NA	-2.05125	0.408803	NA	0.665247	NA	NA	0.637998	NA	0.53649
NG_029568.1	ODF2	NA	NA	NA	NA	NA	NA	NA	NA	NA	NA	NA	NA
NG_029569.2	SEC31A	NA	NA	NA	NA	NA	NA	NA	NA	NA	NA	NA	NA
NG_029576.1	PRDM16	NA	NA	NA	NA	NA	NA	NA	NA	NA	NA	NA	NA
NG_029577.1	HNRNPK	0.096991	0.144679	0.537051	0.544934	-2.48648	0.543487	0.563945	0.23964	0.882167	0.880426	0.366021	0.379586
NG_029578.1	NFX1	NA	NA	NA	NA	NA	NA	NA	NA	NA	NA	NA	NA
NG_029581.1	CCDC39	0.0150305	0.11954	-0.612662	-0.620121	-0.519383	0.22438	0.286302	0.328782	-0.690664	-0.716848	0.773862	0.830472
NG_029583.1	RTL5	-0.754329	NA	-0.249844	NA	NA	-0.299945	NA	0.0406007	1.83056	NA	-1.05876	NA
NG_029589.1	ATP2B4	0.673266	0.84588	-1.02125	-1.61083	-0.626622	0.650657	0.790886	0.62946	0.168161	0.0814577	0.632526	0.755591
NG_029595.1	EED	NA	NA	NA	NA	NA	NA	NA	NA	NA	NA	NA	NA
NG_029598.1	HMGN3	NA	NA	NA	NA	NA	NA	NA	NA	NA	NA	NA	NA
NG_029600.1	NFAT5	-1.06356	-0.937003	-1.63355	-1.56345	-0.993444	-0.642576	-0.548975	0.109857	1.12777	1.1943	0.898128	0.979728
NG_029603.1	HEPACAM	NA	NA	NA	NA	NA	NA	NA	NA	NA	NA	NA	NA
NG_029604.1	QKI	-0.963941	-0.880652	0.821154	0.862322	0.68944	0.502262	0.559834	0.718193	0.630396	0.664245	0.323252	0.369755
NG_029606.1	HIF1A	1.08965	1.23856	-0.445184	-0.69868	-0.0391672	0.103167	-0.0059801	-0.0156605	1.68736	1.94324	1.51579	1.73969
NG_029607.1	HSF2	0.320895	0.367552	0.58128	0.575689	-2.14954	-0.939192	-0.899159	-0.700401	1.07108	1.04781	-0.861676	-0.835348
NG_029612.2	SOX5	-0.666266	-1.07591	-0.0640432	-0.37121	-0.68879	-0.236467	-0.564733	-0.703378	0.834963	0.846407	-0.378985	-0.791103
NG_029614.1	PDE7A	0.469195	0.903427	0.268294	0.248525	-0.76482	0.694029	1.44034	-0.194404	0.462143	0.755657	0.0144434	-0.429812
NG_029615.1	APBB1	0.247179	0.337985	-1.72988	-1.78001	0.590594	0.651483	0.76013	0.456265	0.934156	1.04435	-0.796478	-0.785007
NG_029619.1	NTRK3	0.337141	0.493402	-1.48575	-1.43853	-0.307819	1.34617	1.48005	1.01188	-0.0294109	0.0396679	-0.779083	-0.707308
NG_029621.1	PDE1B	-0.531203	-0.477753	0.73743	0.747382	-0.872512	-1.00054	-0.961076	-0.799857	1.43105	1.42708	0.911253	0.922423
NG_029626.1	SNAP25	-0.597622	-0.466533	-1.0186	-1.00781	-0.559353	0.725921	0.828364	0.318977	1.16366	1.20323	-1.60848	-1.59753
NG_029628.1	RPL41P3	-0.30834	-0.182539	-1.85818	-1.75094	1.58722	0.448809	0.523788	1.49381	1.21002	1.24322	0.359014	0.42529
NG_029642.1	DDX17	0.181454	0.217057	0.630324	0.636419	-1.60918	0.704401	0.724793	0.580631	1.14198	1.14267	0.751607	0.760917
NG_029648.1	POLR3A	NA	NA	NA	NA	NA	NA	NA	NA	NA	NA	NA	NA
NG_029659.1	BMP1	0.640841	0.742633	-1.19166	-1.13896	0.463655	0.707623	0.783155	0.899125	1.40724	1.45893	1.17002	1.23383
NG_029663.1	CEP170	-0.641409	-0.551818	-1.77732	-1.70374	0.487141	-0.390969	-0.325573	1.35142	1.7843	1.79901	-0.821936	-0.758576
NG_029667.1	ADAM15	0.290924	0.342899	-1.34975	-1.31258	-1.40195	0.718796	0.758517	0.368515	1.03067	1.03727	0.310035	0.333132
NG_029677.3	GRM4	0.27083	0.26742	-1.41384	-2.10735	0.294522	0.574089	0.669416	0.7724	0.769034	0.921451	0.363729	0.368471
NG_029678.1	HDAC3	NA	NA	NA	NA	NA	NA	NA	NA	NA	NA	NA	NA
NG_029680.1	HNRNPA2B1	NA	NA	NA	NA	NA	NA	NA	NA	NA	NA	NA	NA
NG_029681.1	HNRNPDL	-0.0510835	-0.0129166	0.301118	0.310489	0.294364	0.458302	0.478814	-3.22836	0.491473	0.494906	0.254768	0.267507
NG_029689.1	AFDN	NA	NA	NA	NA	NA	NA	NA	NA	NA	NA	NA	NA
NG_029695.1	PFDN5	0.524512	0.587756	-1.24849	-1.23239	0.909245	0.867351	0.915651	0.7665	-0.451659	-0.434232	-0.938352	-0.916083
NG_029704.1	PTPN13	-0.196662	-0.106558	1.75235	1.80024	1.46285	0.170958	0.233458	-0.838795	-0.482685	-0.445896	-0.699374	-0.649123
NG_029708.1	SNX1	NA	NA	NA	NA	NA	NA	NA	NA	NA	NA	NA	NA
NG_029709.1	SORBS2	0.639479	0.843463	-0.829004	-1.63512	-0.820948	0.926085	1.29257	0.918154	0.854235	1.14751	0.823525	1.10941
NG_029710.1	SPAG9	0.472637	0.470988	-1.38849	-1.37927	0.743597	-0.372335	-0.37501	0.597664	-0.614509	-0.630425	1.0604	1.01217
NG_029711.1	STC1	-0.305937	-0.212932	0.39613	0.46692	-0.750788	0.109756	0.187683	-0.693889	-0.0708818	-0.0201045	-0.368888	-0.313511
NG_029712.1	SYTL2	NA	NA	NA	NA	NA	NA	NA	NA	NA	NA	NA	NA
NG_029715.1	TP53I3	0.64608	0.745427	0.292424	0.337377	-1.29498	0.661612	0.733496	-0.104057	1.3032	1.36793	-0.296302	-0.26246
NG_029721.1	SH3D19	-0.416428	-0.331262	-1.3281	-1.27324	0.994069	0.527571	0.591132	1.32845	-0.335536	-0.292842	1.30813	1.35371
NG_029724.1	KIF1A	0.0178774	-0.0270361	-0.333152	-0.478283	-0.123205	-0.175987	-0.280013	-0.149259	1.68283	1.98347	1.19253	1.39127
NG_029726.1	DNM1	-0.226321	-0.193022	-2.66694	-2.77426	0.334547	0.509906	0.552779	0.653075	1.15903	1.20319	0.137587	0.15142
NG_029728.1	PRKACB	-0.2123	-0.116578	1.53869	1.56196	-0.183662	0.0432662	0.110828	1.65784	2.37867	2.3779	-0.870304	-0.793487
NG_029729.1	ALCAM	-0.424892	-0.348292	-0.803663	-0.747309	-0.0423603	-1.0705	-0.989864	2.06332	0.120231	0.119727	2.26193	2.1603
NG_029731.1	CLCN3	-0.206488	-0.151111	-3.21342	-3.13846	-0.0080843	0.530731	0.542649	0.194984	0.95379	0.932107	-1.95679	-1.9029
NG_029734.1	SLC24A2	NA	NA	NA	NA	NA	NA	NA	NA	NA	NA	NA	NA
NG_029742.1	ERLEC1	-1.04272	-0.972178	1.3356	1.37831	1.26294	-0.191737	-0.142877	0.393174	-0.153767	-0.127637	1.56797	1.61682
NG_029751.1	PSPC1	NA	NA	NA	NA	NA	NA	NA	NA	NA	NA	NA	NA
NG_029752.2	STARD13	1.09108	1.1828	-2.12736	-2.05706	-0.107531	-0.412096	-0.331798	-0.47422	2.20351	2.25376	1.37514	1.43976
NG_029754.1	TRAPPC1	-0.7328	-0.657585	0.0348031	0.0613944	-0.0151972	0.415831	0.457278	1.80269	0.266726	0.284155	-0.440351	-0.40672
NG_029755.1	AGAP2	NA	NA	NA	NA	NA	NA	NA	NA	NA	NA	NA	NA
NG_029759.2	BICC1	1.92212	2.0167	-0.208708	-0.146866	-0.67787	2.06439	2.13032	-0.870408	0.914801	0.970062	-1.09561	-1.02991
NG_029760.1	ZNF644	NA	NA	NA	NA	NA	NA	NA	NA	NA	NA	NA	NA
NG_029763.1	ASIC2	0.0857979	0.25274	-1.31074	-1.16663	-0.425188	0.845275	0.946428	0.559186	1.4884	1.53191	0.344071	0.443728
NG_029764.1	AKT3	NA	NA	NA	NA	NA	NA	NA	NA	NA	NA	NA	NA
NG_029766.1	KIF13A	0.443639	0.48179	-3.08045	-3.08847	0.623184	0.434895	0.456746	-0.110944	1.09233	1.09777	0.533662	0.548511
NG_029768.1	SPECC1	0.223705	0.35672	-1.21457	-1.16531	0.989338	0.771498	0.881578	0.582911	1.38133	1.47145	-2.21734	-2.18138
NG_029769.1	ROCK2	-1.17673	-1.11736	-0.902383	-0.886379	-0.911475	-0.488917	-0.455852	1.5787	0.898399	0.908713	0.300813	0.324387
NG_029770.1	APLP2	-0.80209	-0.757111	-0.89115	-0.865334	0.573325	0.725136	0.757093	-0.952032	0.851457	0.8723	0.66555	0.692147
NG_029771.1	MARK2	0.211893	0.196263	-1.61473	-1.70064	0.934551	1.01741	0.985548	1.0949	1.42972	1.37872	-0.757464	-0.826089
NG_029773.1	ATF6	0.31125	0.386265	1.09176	1.13253	0.226918	-0.0170514	0.0397506	-0.50774	-0.363783	-0.322939	1.89299	1.93414
NG_029776.1	CDON	0.604134	0.793542	-0.953661	-0.843723	0.835028	-0.59577	-0.46144	1.08221	-1.20373	-1.10781	1.66666	1.81146
NG_029777.1	KCNH1	0.11699	0.130503	-0.86373	-0.849411	-0.086355	0.314109	0.289124	-0.750739	2.44348	2.27982	-0.83487	-0.816456
NG_029778.1	MAGI1	NA	-0.0016693	NA	-1.30413	0.474276	NA	0.406565	NA	NA	-0.855479	NA	1.336
NG_029780.1	XRCC5	1.76276	1.81886	-1.25719	-1.2707	1.9729	-0.192011	-0.180208	-0.386134	2.71095	2.73175	-0.589092	-0.591107
NG_029781.1	GRM7	-0.117423	0.023057	-2.02534	-1.90147	-0.984327	0.538131	0.629071	0.69523	0.437774	0.499053	0.502031	0.579075
NG_029784.1	ESRRG	0.508288	0.666069	-1.29143	-1.1973	-0.202142	1.22898	1.34786	-0.215285	-0.0378785	0.0486599	1.01298	1.12084
NG_029785.1	LMO3	NA	0.546396	NA	-0.154452	0.335062	NA	-2.00627	NA	NA	1.09421	NA	0.649183
NG_029786.1	DHDDS	0.0601655	0.155792	0.853628	0.913406	0.145649	0.0310079	0.0994397	-0.138028	0.331233	0.378444	-2.19021	-2.15245
NG_029787.1	MVB12B	NA	NA	NA	NA	NA	NA	NA	NA	NA	NA	NA	NA
NG_029792.1	CIT	NA	NA	NA	NA	NA	NA	NA	NA	NA	NA	NA	NA
NG_029795.1	ETV1	0.255339	0.282032	0.436933	0.526783	0.466695	0.599379	0.797173	0.149034	0.996891	1.39903	0.417578	0.501077
NG_029807.1	RAP1GAP	NA	NA	NA	NA	NA	NA	NA	NA	NA	NA	NA	NA
NG_029808.1	SMG7	-0.61862	-0.935759	0.640069	0.762232	-0.965847	0.860889	1.07846	-0.403391	-0.159845	-0.344246	0.753785	0.922544
NG_029810.1	CHST11	NA	NA	NA	NA	NA	NA	NA	NA	NA	NA	NA	NA
NG_029811.1	CHST1	-0.620803	-1.16604	0.445946	0.497684	-1.75689	0.488076	0.578293	0.634163	0.457929	0.510012	0.597478	0.743156
NG_029817.1	SPTBN1	-1.16635	-1.0825	1.05658	1.09246	0.723007	0.790187	0.843045	-2.29205	-0.46032	-0.42759	-0.0094859	0.0344478
NG_029821.1	RAB6A	-0.370393	-0.304726	-0.763456	-0.719513	1.13667	1.07972	1.11862	-0.920126	-0.787247	-0.747819	1.18433	1.2139
NG_029822.1	RARG	0.131354	0.201974	-0.473548	-0.437162	-0.233298	0.184921	0.235902	0.49355	2.16534	2.20464	-0.054954	-0.0134515
NG_029825.1	USP2	NA	NA	NA	NA	NA	NA	NA	NA	NA	NA	NA	NA
NG_029828.1	CHST2	-1.45334	-1.38752	0.104787	0.102055	1.3458	-0.707175	-0.679696	-0.510047	-0.218071	-0.221973	-0.547898	-0.534863
NG_029829.1	CEP57	NA	NA	NA	NA	NA	NA	NA	NA	NA	NA	NA	NA
NG_029830.1	MAX	-0.658033	-0.604243	0.214335	0.226366	0.470994	0.100455	0.129299	-2.51158	1.64039	1.66774	-2.11878	-2.14302
NG_029831.1	CRTAC1	0.618468	0.626097	-1.09904	-1.0925	-1.21437	1.30163	1.272	-1.02403	1.23194	1.19198	0.639334	0.61992
NG_029836.1	KCNIP2	NA	NA	NA	NA	NA	NA	NA	NA	NA	NA	NA	NA
NG_029838.1	SMTN	-0.876204	-0.822983	-1.93536	-1.90997	-0.916039	-0.672876	-0.643815	-1.1246	0.0349137	0.0384929	-1.43763	-1.41185
NG_029839.1	CMIP	NA	NA	NA	NA	NA	NA	NA	NA	NA	NA	NA	NA
NG_029844.1	KAZN	-1.52918	-1.2938	-2.24666	-2.04742	0.206724	-0.428909	-0.277717	0.401105	1.03407	1.08848	-0.154116	-0.0310307
NG_029846.1	SSH1	-0.012176	0.0203955	-0.652519	-0.683162	0.930983	-0.394055	-0.399412	-0.870258	2.23621	2.30069	1.72062	1.77893
NG_029850.1	HNRNPM	NA	NA	NA	NA	NA	NA	NA	NA	NA	NA	NA	NA
NG_029852.1	TSC22D1	NA	NA	NA	NA	NA	NA	NA	NA	NA	NA	NA	NA
NG_029859.1	LIMA1	0.23327	0.349369	-1.73983	-1.70313	-0.0508892	-1.66182	-1.61061	0.149411	0.0134949	0.0624215	-0.003287	0.0614361
NG_029860.1	ANKS1B	0.0540799	0.207106	0.667335	0.739778	-0.0284237	0.610132	0.715304	-0.736955	0.170365	0.232755	0.671089	0.752184
NG_029861.1	MSH4	0.0523549	0.140556	-1.42977	-1.39459	0.00976298	-0.435857	-0.376287	-0.141389	-0.306738	-0.26264	1.20066	1.27469
NG_029862.1	TRA2B	0.00773304	0.0906451	-1.23561	-1.17809	0.308507	0.498478	0.55302	0.765125	1.13381	1.16524	0.834595	0.879694
NG_029864.1	UBTF	-1.12916	-1.03905	-0.678048	-0.644198	1.26812	1.48071	1.48382	-0.687574	1.31378	1.30065	1.22281	1.22461
NG_029865.2	PIAS2	-0.190985	-0.118242	0.950107	0.912394	-1.17353	0.842749	0.834357	0.312107	0.847332	0.804749	0.509759	0.500506
NG_029867.1	RPL18	-1.23373	-1.20965	-0.365924	-0.342554	0.669782	0.929079	0.985992	-1.16411	0.950547	0.967396	0.841003	0.866994
NG_029869.1	ADCYAP1R1	NA	NA	NA	NA	NA	NA	NA	NA	NA	NA	NA	NA
NG_029872.1	ABLIM1	NA	NA	NA	NA	NA	NA	NA	NA	NA	NA	NA	NA
NG_029874.2	ADAM23	-0.010711	0.0828982	0.477471	0.518578	0.331161	0.797122	0.879114	0.481812	-2.24883	-2.32909	0.407611	0.454304
NG_029882.1	CYTH3	NA	NA	NA	NA	NA	NA	NA	NA	NA	NA	NA	NA
NG_029883.1	DAPK1	-0.0219321	-0.0802232	-0.253739	-0.410878	1.49234	-0.0786559	-0.176717	-0.361693	1.41943	1.72356	-0.147807	-0.270949
NG_029885.1	GIT2	-0.147242	-0.077157	-1.97234	-1.98329	0.459277	0.782317	0.847244	1.0389	0.659154	0.695496	0.457447	0.502275
NG_029886.1	GLRX3	0.391411	0.501167	1.1458	1.18727	-0.944087	-0.795169	-0.671939	0.733511	1.30967	1.33732	0.670895	0.735142
NG_029890.1	INPP4A	NA	NA	NA	NA	NA	NA	NA	NA	NA	NA	NA	NA
NG_029891.1	INPP5K	0.798909	0.843203	-1.58457	-1.57661	-0.0920252	1.07622	1.10687	0.954534	-0.792816	-0.785853	-0.846992	-0.832918
NG_029892.2	KCNJ6	0.348389	NA	-1.38724	NA	NA	0.404176	NA	0.53117	1.64	NA	-0.209003	NA
NG_029895.1	LIMK2	0.228227	0.315413	0.324309	0.372601	0.506308	0.648177	0.737309	0.194403	0.73705	0.80936	0.0104875	0.0394003
NG_029898.1	NRCAM	NA	NA	NA	NA	NA	NA	NA	NA	NA	NA	NA	NA
NG_029900.1	PAK1	0.348788	0.426787	-1.29969	-1.23752	-1.16133	1.06973	1.1199	0.903783	-0.825122	-0.773148	0.97865	1.02433
NG_029905.1	SPTBN4	0.150778	0.159155	0.181711	0.169681	0.151542	0.24691	0.28644	0.13107	0.776537	1.10327	0.216486	0.229253
NG_029906.1	SRSF6	0.252497	0.277442	0.583589	0.579538	0.0778597	0.287331	0.291085	0.338972	1.09375	1.09237	0.174514	0.16724
NG_029908.1	TFCP2	0.865634	0.903366	-1.66127	-1.66648	-0.792684	0.518653	0.528573	1.24757	0.00946606	-0.0051883	0.562612	0.561117
NG_029911.1	TPD52L1	0.0896833	0.168871	1.59835	1.62496	-0.98786	0.826869	0.875721	-1.81155	0.71059	0.72727	-1.38619	-1.35449
NG_029917.1	ANK3	0.453975	0.536488	-2.21509	-2.0896	0.624223	-1.25592	-1.13835	0.217321	1.2664	1.28275	0.876892	0.916109
NG_029919.1	BRWD1	-0.952068	-0.804438	-0.899183	-0.807623	-0.455326	-0.0224909	0.0955192	0.739127	1.92424	2.01004	1.49845	1.60378
NG_029924.1	CKAP5	2.22277	2.29836	-1.94628	-1.87352	-0.0353318	0.24465	0.318631	-0.721384	0.293085	0.345915	-0.0037149	0.06307
NG_029930.1	DHX9	NA	NA	NA	NA	NA	NA	NA	NA	NA	NA	NA	NA
NG_029933.1	IL16	NA	NA	NA	NA	NA	NA	NA	NA	NA	NA	NA	NA
NG_029938.1	NFASC	-0.0558356	NA	0.889119	NA	NA	0.226988	NA	0.691133	1.19187	NA	0.434736	NA
NG_029940.1	PTPRB	0.0436568	-0.0858093	0.390943	0.467955	1.06131	-0.378937	-0.858597	0.997566	-0.290647	-0.736909	0.615094	0.867239
NG_029948.2	TACC2	-0.599164	-0.574709	-1.38954	-1.43949	-0.65839	-0.0507477	-0.0153877	1.21761	1.5179	1.6186	0.218747	0.259993
NG_029954.1	NEDD4L	0.721214	0.807449	1.19927	1.27995	-1.01533	0.757024	0.819928	-1.21527	1.0594	1.1216	-0.600461	-0.654195
NG_029955.1	RBM39	0.425098	NA	-1.89128	NA	NA	-1.17594	NA	0.806551	1.0285	NA	0.809127	NA
NG_029960.1	ZMYND11	-1.43417	-1.33758	0.256037	0.299523	-1.41438	0.810591	0.857197	0.691056	1.1183	1.14372	0.75031	0.790155
NG_029962.1	ZNF655	NA	NA	NA	NA	NA	NA	NA	NA	NA	NA	NA	NA
NG_029966.1	PTPRN2	0.101035	0.121573	-1.26329	-1.32693	1.25245	-0.0415046	-0.0440331	1.37792	1.75996	1.81955	-0.67372	-0.708987
NG_029967.1	TIA1	NA	NA	NA	NA	NA	NA	NA	NA	NA	NA	NA	NA
NG_029968.1	FZD8	-1.83282	-2.13585	-0.734699	-0.945264	0.3001	-0.703639	-0.858954	0.362995	1.71937	1.91601	0.220642	0.181523
NG_029972.1	PIANP	-0.686447	-0.654993	-1.34536	-1.32751	-1.00145	1.49996	1.48007	1.0979	0.0557493	0.0402437	-0.651373	-0.643804
NG_029982.1	PRKG1	-1.99289	-2.5166	0.60483	0.666786	-0.185147	0.349902	0.37831	-0.193487	1.46406	1.729	-0.821624	-1.1119
NG_030010.1	TRRAP	NA	NA	NA	NA	NA	NA	NA	NA	NA	NA	NA	NA
NG_030011.1	ITGB3BP	-0.213835	-0.172082	-0.724712	-0.743026	-0.690995	2.13625	2.2299	0.618736	-0.402576	-0.419498	-0.444364	-0.44895
NG_030012.1	LUC7L2	-0.567436	NA	0.00142897	NA	NA	0.401238	NA	-0.53068	1.77694	NA	0.0545833	NA
NG_030013.1	BCAN	0.365169	NA	-1.24353	NA	NA	0.518832	NA	0.541138	0.48358	NA	0.552063	NA
NG_030015.1	STARD3NL	-0.352925	-0.376516	-1.13682	-1.24689	-1.11614	1.29369	1.35463	-0.421093	1.66232	1.72739	-0.428007	-0.487868
NG_030016.1	LRRN3	-0.458682	-0.391129	0.762599	0.727956	0.702741	2.29846	2.21309	0.646985	-0.339341	-0.336628	1.25515	1.2055
NG_030017.1	SYNJ1	NA	NA	NA	NA	NA	NA	NA	NA	NA	NA	NA	NA
NG_030018.1	SH3GLB1	0.72506	0.768355	1.03907	1.03292	-0.708633	-1.33248	-1.30714	-1.23014	1.33565	1.31904	-0.823517	-0.813333
NG_030019.1	HMGN2P9	NA	NA	NA	NA	NA	NA	NA	NA	NA	NA	NA	NA
NG_030020.1	DPYSL2	-0.713716	-0.810143	0.657305	0.702363	0.838012	-0.0583138	-0.0986439	0.567545	-0.900238	-1.11211	1.15147	1.28211
NG_030025.1	ABI1	0.41519	NA	-0.948407	NA	NA	0.694058	NA	0.417073	0.729519	NA	0.595185	NA
NG_030026.1	HIVEP3	0.0986288	0.198394	-0.85152	-0.800869	-0.472783	1.5028	1.56474	-1.25392	1.64245	1.66601	1.64281	1.68279
NG_030027.1	ARID5B	-0.11603	-0.008399	-0.301716	-0.236412	-0.759523	-0.52329	-0.442627	-0.409928	-0.359671	-0.30214	2.10048	2.17811
NG_030032.1	HSPBAP1	1.11971	NA	-0.36043	NA	NA	1.44473	NA	-0.204502	0.0432038	NA	1.12663	NA
NG_030033.1	PDE3A	NA	NA	NA	NA	NA	NA	NA	NA	NA	NA	NA	NA
NG_030034.1	STX5	0.694903	0.844417	-1.48203	-2.00199	0.340038	0.459472	0.520915	-0.620461	0.660848	0.763535	0.516313	0.585574
NG_030039.1	FGGY	NA	NA	NA	NA	NA	NA	NA	NA	NA	NA	NA	NA
NG_030048.1	CACNB3	NA	NA	NA	NA	NA	NA	NA	NA	NA	NA	NA	NA
NG_030312.1	DAB2	-0.301214	-0.231353	-0.573411	-0.553767	-2.4007	0.277646	0.327611	1.04589	1.42919	1.47347	1.15354	1.2071
NG_030314.1	TNRC17	0.313282	0.413122	-1.19277	-1.15795	2.20121	-0.268429	-0.203141	-0.583955	0.199339	0.250408	0.613296	0.683186
NG_030324.1	MGAT5	0.289377	0.362879	-0.849353	-0.826567	-0.34924	0.480192	0.528165	2.50437	-0.340411	-0.322264	-0.392109	-0.361367
NG_030328.1	NRP1	0.148114	0.296494	-1.04054	-0.974456	0.085578	0.850914	0.951636	-1.05673	0.0175978	0.0740618	-0.623601	-0.546397
NG_030329.1	GAREM1	-0.416735	-0.360443	1.74834	1.70204	-0.131307	-1.02732	-0.973669	1.78548	-1.20579	-1.1688	0.826257	0.812194
NG_030330.1	PPP1R1B	NA	NA	NA	NA	NA	NA	NA	NA	NA	NA	NA	NA
NG_030333.1	NFIC	0.778399	0.983729	-1.74128	-1.67231	0.84382	-1.17682	-1.05874	-0.930146	1.95705	2.09557	-0.233441	-0.119999
NG_030334.1	RASGRF2	0.509762	0.60414	-1.24507	-1.18475	1.25728	0.666863	0.739813	1.49048	2.14331	2.20806	-0.158667	-0.0909769
NG_030335.1	SEL1L	0.141252	0.185335	-3.83208	-3.82079	0.173647	0.190975	0.217888	0.165218	0.719539	0.729162	0.0161103	0.038102
NG_030339.2	MARK3	NA	NA	NA	NA	NA	NA	NA	NA	NA	NA	NA	NA
NG_030340.1	AFF4	-0.0963074	-0.0072676	-2.34583	-2.3068	-1.83712	0.823933	0.893657	0.736079	0.50633	0.541853	0.867215	0.917502
NG_030341.1	NACA	1.35857	1.41914	-1.04684	-1.09586	-0.318751	-0.0062111	-0.0153955	1.43178	1.57547	1.59711	1.30242	1.32529
NG_030343.1	RBPJ	-2.74673	-2.24498	-0.219061	-0.0799857	0.710085	0.630701	0.698792	0.403563	0.187838	0.267393	-0.199865	-0.0546787
NG_030346.1	TRIM41	NA	NA	NA	NA	NA	NA	NA	NA	NA	NA	NA	NA
NG_030347.1	NAV2	NA	NA	NA	NA	NA	NA	NA	NA	NA	NA	NA	NA
NG_030349.2	MIA2	1.2887	1.41485	-1.49436	NA	-0.263921	1.73502	1.83185	1.47364	0.4303	NA	1.47222	NA
NG_030352.1	RPL21P1	-1.22294	-1.16346	0.517909	0.555732	0.770374	-0.777781	-0.736227	-1.30701	1.2083	1.24387	0.86876	0.91255
NG_030353.1	SALL3	-0.682568	-1.3227	-0.284789	-0.690885	1.56786	0.8924	1.33753	0.744476	0.750585	1.05459	0.63877	0.881356
NG_030354.1	ASAP1-IT1	NA	NA	NA	NA	NA	NA	NA	NA	NA	NA	NA	NA
NG_030365.1	POU2F2	0.489118	0.627396	-2.24331	-2.17239	0.686821	-0.845537	-0.74278	-0.197636	0.935876	1.01046	-0.486239	-0.400491
NG_030368.1	TRPC3	NA	NA	NA	NA	NA	NA	NA	NA	NA	NA	NA	NA
NG_030369.1	TRPC1	0.575584	0.691732	-0.0555463	-0.0076774	0.675942	1.02026	1.09097	-0.694637	-0.579679	-0.542899	1.33251	1.38382
NG_030371.1	VIPR1	-0.0981219	NA	-0.871025	NA	NA	0.783633	NA	0.560542	0.677193	NA	0.697858	NA
NG_030373.1	GTF3C3	0.642997	0.732447	1.20237	1.24167	-1.39702	1.40954	1.46448	-0.900433	-0.818163	-0.7684	0.959629	1.00634
NG_030377.1	STYX	-0.67963	-0.565695	-0.257428	-0.202948	0.426144	0.445995	0.563057	0.516516	1.72054	1.84471	0.00176577	0.0765906
NG_030394.1	RBM14	-0.829389	NA	-1.1451	NA	NA	0.179457	NA	0.215736	1.74098	NA	0.534438	NA
NG_030403.1	RBM5	0.523643	0.610637	0.597253	0.648635	-1.07515	-0.262856	-0.169689	0.748236	1.35229	1.37019	0.833288	0.880117
NG_030404.1	NUDT6	NA	NA	NA	NA	NA	NA	NA	NA	NA	NA	NA	NA
NG_030414.1	SPOCK3	NA	NA	NA	NA	NA	NA	NA	NA	NA	NA	NA	NA
NG_030415.1	SLC30A5	-0.621439	-0.502309	1.19451	1.21976	0.712756	0.977496	1.02417	0.924938	-0.245225	-0.184226	0.860348	0.900181
NG_030416.2	RIC3	-0.127018	-0.0986074	0.477148	0.469443	-1.45319	0.413428	0.418197	0.473127	0.895056	0.880176	0.327915	0.324495
NG_030437.1	RCAN2	1.62866	1.69727	-0.645217	-0.5924	0.613822	0.0417448	0.104656	-0.720716	2.25798	2.30135	-0.291038	-0.234834
NG_030438.1	TRDN	NA	NA	NA	NA	NA	NA	NA	NA	NA	NA	NA	NA
NG_030439.1	PAPOLA	NA	NA	NA	NA	NA	NA	NA	NA	NA	NA	NA	NA
NG_030461.1	ACIN1	-0.565728	-0.407802	-1.20455	-1.16257	-1.18281	0.661904	0.803961	-0.353864	1.72143	1.82166	0.360543	0.45629
NG_030484.1	ADK	0.80961	0.900252	-1.90172	-1.81637	-0.606266	1.55261	1.59099	0.21513	-0.651425	-0.601192	1.25958	1.2908
NG_030588.1	LUZP2	0.283513	NA	0.291733	NA	NA	0.381082	NA	0.601833	-0.486101	NA	0.700227	NA
NG_031806.2	GOSR2	-0.364834	-0.319322	-0.514011	-0.515513	0.911716	-0.149085	-0.125553	-0.303793	2.11319	2.16668	-0.235314	-0.225046
NG_031813.1	WDR19	0.294365	0.399669	-0.128457	-0.0602421	-1.07502	-0.490133	-0.399661	-0.905256	1.8446	1.86358	-0.717447	-0.631851
NG_031822.1	ERBIN	-0.19735	-0.125081	1.04159	1.08077	-0.449735	-0.23054	-0.182984	-0.229983	1.95006	1.98605	1.3639	1.409
NG_031823.1	SLA2	1.19857	1.24229	1.85995	1.87705	-0.83319	1.56186	1.58761	-0.670936	-0.434403	-0.448389	-0.7039	-0.710471
NG_031835.1	RXFP1	NA	NA	NA	NA	NA	NA	NA	NA	NA	NA	NA	NA
NG_031847.1	SRA1	0.597004	0.676693	1.01186	1.08621	-1.64584	0.900789	0.985171	0.928131	0.0876407	0.0586965	-1.42259	-1.5934
NG_031853.2	EPB41L1	-0.175654	-0.160131	0.205252	0.218574	-1.61056	0.922498	1.02467	0.467017	0.686743	0.743338	0.532901	0.585991
NG_031854.1	GRIN2B	1.53982	1.78121	-0.65268	-0.545687	1.18603	-0.674163	-0.536136	0.380426	0.183597	0.300057	0.377278	0.523405
NG_031857.1	PTPRO	-0.0825185	0.0265603	-1.58141	-1.51632	1.49595	1.62768	1.71157	1.18849	2.33223	2.38507	-0.642436	-0.572942
NG_031860.1	ARG1	0.653912	0.680754	0.969246	0.934241	-0.526716	-0.997164	-0.928797	1.01606	-0.591693	-0.568934	1.52298	1.46997
NG_031861.1	CACNG2	0.769055	NA	-1.01068	NA	NA	1.72213	NA	-1.11312	0.759916	NA	-0.760935	NA
NG_031863.1	B3GAT3	-0.0445612	-0.0228498	0.69962	0.759936	0.467274	0.203846	0.226273	-2.14315	0.850699	0.919671	0.17187	0.180033
NG_031871.1	ATP5F1E	-0.746414	-0.677845	2.0514	2.0693	0.623281	-0.30856	-0.263396	-1.02263	-0.880065	-0.849763	1.52742	1.55229
NG_031875.1	AP4E1	1.04951	1.13535	0.286929	0.3422	-0.028467	0.712127	0.779088	1.12792	-0.312898	-0.252326	1.55899	1.59305
NG_031877.1	IGFBP7	-0.560194	-0.456828	2.29295	2.26551	-0.381911	0.0770151	0.141385	1.91048	-0.431871	-0.370032	2.01138	1.99795
NG_031878.2	PDE10A	NA	NA	NA	NA	NA	NA	NA	NA	NA	NA	NA	NA
NG_031890.1	ASCC1	-0.540563	-0.411713	-1.46138	-1.3529	-0.16343	0.325324	0.397359	-0.544557	1.48681	1.50596	0.299683	0.364435
NG_031913.1	AP4S1	NA	0.771555	NA	1.03621	0.159553	NA	0.226021	NA	NA	1.29761	NA	0.00137692
NG_031915.2	SPECC1L	NA	NA	NA	NA	NA	NA	NA	NA	NA	NA	NA	NA
NG_031923.1	PHLPP1	0.370232	0.477445	0.488088	0.548175	1.01447	-0.441972	-0.352696	-0.727382	1.67687	1.71093	1.00526	1.06289
NG_031929.1	P3H2	0.679691	0.749435	-3.38226	-3.36327	-0.370773	0.382548	0.432273	-0.346363	-0.28383	-0.249565	0.8984	0.936089
NG_031930.1	PRICKLE2	1.40896	1.36134	-1.62231	-1.59995	1.24471	1.95904	1.86845	-0.616081	-0.273383	-0.303947	0.816108	0.758995
NG_031932.1	CNNM2	0.0277971	0.136428	-1.59031	-1.51472	-0.0294429	-0.651143	-0.566211	0.105978	0.48395	0.537504	2.17521	2.23018
NG_031933.1	BMPER	NA	NA	NA	NA	NA	NA	NA	NA	NA	NA	NA	NA
NG_031944.1	CCDC88A	NA	NA	NA	NA	NA	NA	NA	NA	NA	NA	NA	NA
NG_031957.1	IFT43	NA	0.440293	NA	-0.0184105	0.216752	NA	1.18203	NA	NA	1.20975	NA	-0.545135
NG_031959.2	MED26	NA	NA	NA	NA	NA	NA	NA	NA	NA	NA	NA	NA
NG_031962.1	SYT14	1.23748	1.51642	-1.7522	-1.73307	0.791159	0.686499	0.8804	0.223202	-0.614327	-0.544709	-0.609467	-0.513136
NG_031968.2	SLC24A1	NA	0.12175	NA	-0.849449	-0.597582	NA	0.0940663	NA	NA	0.460617	NA	0.664412
NG_031972.1	SMCHD1	-0.329012	-0.261152	1.01788	1.06488	0.0762774	-0.416251	-0.376554	0.95866	1.68648	1.7365	-0.91602	-0.895542
NG_031973.2	ANKRD26	NA	NA	NA	NA	NA	NA	NA	NA	NA	NA	NA	NA
NG_031974.1	DNAAF9	NA	NA	NA	NA	NA	NA	NA	NA	NA	NA	NA	NA
NG_031988.1	S100PBP	NA	NA	NA	NA	NA	NA	NA	NA	NA	NA	NA	NA
NG_031991.1	BBC3	1.50116	2.10516	-0.99808	-1.65402	0.0578698	0.22804	0.185955	-0.249458	1.62123	2.22536	-0.205634	-0.471253
NG_032003.1	ANKRD11	1.01019	1.0775	0.721595	0.772382	1.18477	1.04634	1.09683	-0.816662	1.34582	1.37622	0.937706	0.986052
NG_032011.2	KCND3	NA	NA	NA	NA	NA	NA	NA	NA	NA	NA	NA	NA
NG_032024.1	CACNA1G	0.774628	0.793626	-1.42931	-1.41332	-1.19212	0.920285	0.908973	0.00034531	1.31505	1.2823	-0.626959	-0.617868
NG_032029.1	MKNK1	0.435447	0.502164	-1.03177	-1.55365	-0.344275	0.572722	0.669717	0.414352	1.44788	1.85249	0.423588	0.453351
NG_032035.1	RAB18	-0.739902	-0.60668	-1.07899	-0.971423	1.1974	-0.764067	-0.659149	-0.146367	1.94226	1.87083	1.39904	1.37238
NG_032036.1	NCAM1	-0.984349	-0.806403	-0.876259	-0.797519	-0.920453	-0.335278	-0.226657	1.24448	1.78038	1.80455	-1.0354	-0.941917
NG_032042.1	ANXA5	NA	NA	NA	NA	NA	NA	NA	NA	NA	NA	NA	NA
NG_032046.2	CHRM3	-0.144595	-0.834643	0.310948	0.267435	-0.941005	0.262648	0.172025	-0.464133	0.511327	0.771421	0.331803	0.329926
NG_032047.1	TSHZ1	-1.73451	-1.66356	0.771515	0.819821	-0.744682	1.06344	1.1464	1.34256	0.534653	0.57056	1.22401	1.28267
NG_032048.1	KAT6B	0.969148	1.06783	-1.69982	-1.63962	0.459618	-1.16789	-1.08033	-1.34395	0.746618	0.785854	1.1237	1.1786
NG_032059.1	ERLIN2	-0.234635	-0.186444	-2.04997	NA	-0.588623	0.432787	0.445764	0.032242	1.62747	NA	0.303381	NA
NG_032072.1	MEGF10	0.231226	0.336854	-1.96315	-1.89585	-0.0596865	-0.601533	-0.519219	0.866365	0.542137	0.597401	-0.59972	-0.529438
NG_032073.1	GLCCI1	NA	NA	NA	NA	NA	NA	NA	NA	NA	NA	NA	NA
NG_032079.1	AGK	NA	NA	NA	NA	NA	NA	NA	NA	NA	NA	NA	NA
NG_032091.1	SETD2	0.899736	1.07994	-1.20992	-1.60727	0.306295	-0.409582	-0.587855	-0.295411	1.23508	1.46488	0.997632	1.1754
NG_032093.2		0.441697	0.534723	-0.0812456	-0.0369372	0.0605055	-0.792871	-0.7266	-1.30814	1.25131	1.28104	2.03803	2.07988
NG_032108.1	PBRM1	0.652735	0.717199	-0.914223	-0.879172	-0.979267	-0.878694	-0.825669	1.15994	-0.523466	-0.494624	1.31255	1.35157
NG_032111.1	RPL9	NA	NA	NA	NA	NA	NA	NA	NA	NA	NA	NA	NA
NG_032135.1	SRCAP	-0.159642	-0.153815	0.354833	0.364176	0.707	1.82689	1.95915	0.682413	-1.0608	-1.16573	0.777106	0.822704
NG_032143.1	ACO2	NA	NA	NA	NA	NA	NA	NA	NA	NA	NA	NA	NA
NG_032159.2	CRADD	0.332309	0.497328	0.193373	0.277067	0.343492	-0.152284	-0.0456454	2.38482	1.08382	1.16713	-1.21373	-1.1428
NG_032161.1	SLC20A2	NA	NA	NA	NA	NA	NA	NA	NA	NA	NA	NA	NA
NG_032162.2	SMARCA2	0.817818	0.895968	-1.72468	-1.66836	-1.51387	1.25406	1.31106	1.05489	-0.0663084	-0.0350999	0.94037	0.971251
NG_032163.1	SMARCE1	NA	NA	NA	NA	NA	NA	NA	NA	NA	NA	NA	NA
NG_032169.1	CUL3	-0.345834	-0.329999	-1.24967	-1.33002	-0.420179	0.453659	0.490471	-0.748833	1.03846	1.09352	-0.503664	-0.53308
NG_032172.1	STK4	-1.3915	-1.28031	-1.50244	-1.42833	0.56254	-0.388185	-0.311228	0.670408	0.759655	0.800159	-0.0424277	0.0206222
NG_032569.1	KLHL3	-0.712837	-0.67677	-0.931831	-0.954766	-3.36795	-0.362908	-0.358884	0.938123	1.00769	0.994107	0.0397748	0.0331075
NG_032572.1	DIS3L2	NA	NA	NA	NA	NA	NA	NA	NA	NA	NA	NA	NA
NG_032663.1	SLC4A5	0.305827	NA	0.980541	NA	NA	0.635075	NA	0.368419	0.997941	NA	0.803665	NA
NG_032672.1	NDUFA12	1.61489	1.69816	-0.957534	-0.894844	-0.762616	1.97837	2.03764	-0.763842	-0.579995	-0.525804	1.6103	1.66259
NG_032674.1	EFTUD2	-1.18208	-1.18807	-1.06284	-1.10133	-1.25618	-1.04516	-1.0684	0.571713	0.226259	0.222935	-0.97712	-1.00883
NG_032675.1	SLC4A8	0.173083	0.269748	1.13211	1.15894	0.732257	0.648239	0.702598	0.49879	1.24216	1.25796	0.785281	0.828439
NG_032760.1	GAS1	-1.22047	-1.13215	-0.901729	-0.895637	-0.33526	-0.393533	-0.31295	0.0284534	1.37283	1.5122	0.248649	0.34527
NG_032763.1	ELAPOR1	0.498888	0.532169	-1.47769	-1.47327	0.14077	0.834199	0.839447	0.755603	1.55214	1.52737	0.828038	0.821004
NG_032772.1	OFD1P17	0.410543	0.53089	0.523414	0.674223	0.560744	-0.287871	-0.657181	0.662981	0.952091	1.37833	0.132135	0.0292233
NG_032777.1	SF3B4	1.18513	1.19663	-1.3052	-1.20511	-1.60541	-0.120058	-0.0656357	-0.128693	0.349608	0.35161	0.0123332	0.0470417
NG_032779.1	LARP7	NA	NA	NA	NA	NA	NA	NA	NA	NA	NA	NA	NA
NG_032790.1	PLCB4	-1.04584	-0.955588	1.34187	1.37804	0.888276	0.713371	0.771254	-0.831885	-0.316999	-0.274947	-1.28903	-1.22687
NG_032795.1	GNAI3	NA	NA	NA	NA	NA	NA	NA	NA	NA	NA	NA	NA
NG_032804.1	CFAP418	NA	NA	NA	NA	NA	NA	NA	NA	NA	NA	NA	NA
NG_032811.1	WDR81	0.612268	0.633928	-0.864977	-0.902789	-1.15367	0.437128	0.43415	0.779453	-0.803508	-0.846543	0.768508	0.761787
NG_032814.1	SLC16A6	1.94381	2.02855	-1.47392	-1.40185	3.105	-0.377209	-0.301053	0.7846	0.981236	1.03243	0.432125	0.496971
NG_032855.1	LRBA	0.157854	0.279723	-1.10283	-1.051	-0.482502	-0.801239	-0.725939	-0.568385	0.547029	0.613863	1.78526	1.88572
NG_032868.1	RNF170	NA	NA	NA	NA	NA	NA	NA	NA	NA	NA	NA	NA
NG_032869.1	NNT	-0.668196	-0.742803	-1.05558	-1.21314	1.36762	-0.224144	-0.279256	-0.605541	-0.0731979	-0.135957	-0.753885	-0.875424
NG_032870.1	CEP63	NA	NA	NA	NA	NA	NA	NA	NA	NA	NA	NA	NA
NG_032871.1	SLC25A25	0.572491	0.635721	0.961279	0.997305	-0.604747	0.905318	0.950771	0.807015	0.919815	0.951413	0.513403	0.554779
NG_032887.1	GABRG3	NA	NA	NA	NA	NA	NA	NA	NA	NA	NA	NA	NA
NG_032889.1	SERAC1	0.0164357	0.0921724	0.809884	0.849568	0.903698	0.773086	0.828368	0.83106	0.383162	0.412344	-0.423057	-0.386966
NG_032901.2	PRPF40B	-1.08846	-1.02928	-1.45347	-1.45217	-0.24237	-0.455497	-0.421212	-0.908483	1.07662	1.0989	0.589594	0.61934
NG_032904.1	U2AF2	NA	NA	NA	NA	NA	NA	NA	NA	NA	NA	NA	NA
NG_032907.1	SERPINE2	0.116724	0.201395	-0.91635	-0.843477	0.624286	1.74218	1.76259	1.80694	0.386278	0.420917	-0.443842	-0.377995
NG_032925.2	NFIX	0.904498	0.932543	0.59609	0.59647	-1.19011	0.78319	0.792231	-1.19372	0.85712	0.847481	0.916452	0.915995
NG_032931.1	PPM1K	-1.89809	-1.79223	-1.22854	-1.1649	0.960908	0.774073	0.831076	-1.26169	1.28961	1.31101	0.364425	0.411325
NG_032937.1	RYK	0.344544	0.432226	-0.569445	-0.510401	-1.04072	-0.748637	-0.673897	0.885231	1.73424	1.75145	0.980038	1.02118
NG_032939.2	FPGT	NA	NA	NA	NA	NA	NA	NA	NA	NA	NA	NA	NA
NG_032944.1	CAMKMT	1.94962	1.99067	0.465039	0.483501	0.420394	-0.678832	-0.647458	-0.0857052	0.215654	0.226722	-1.16701	-1.15319
NG_032945.1	PFN1	0.611276	0.700076	-0.806876	-1.05921	0.967266	0.867989	0.997382	1.00372	1.19867	1.38501	0.959751	1.10132
NG_032948.1	EMC1	0.445219	0.527929	0.977937	1.01122	0.642299	0.997845	1.04317	0.592274	1.08307	1.10689	0.805357	0.847047
NG_032959.1	GAS2L1	-1.0713	-1.02417	0.911823	0.921402	-0.63903	-0.981316	-0.952425	0.666513	1.20999	1.21263	0.519425	0.534527
NG_032964.1	NBAS	1.30224	1.40192	-1.49736	-1.40946	0.227558	-0.775819	-0.676427	-0.546674	0.670632	0.734095	-0.594408	-0.509086
NG_032965.1	KIAA1549	0.746155	0.826105	-0.86665	-0.818075	-0.338759	1.04652	1.1057	-0.517585	2.01153	2.04809	1.57886	1.6262
NG_032968.1	NIN	0.438932	0.503989	-0.762109	-0.767083	-0.332386	1.10712	1.15765	-0.864719	2.11428	2.16067	-0.977857	-0.982065
NG_032972.2	ADAM3B	NA	-0.285069	NA	-0.941795	-0.159192	NA	-0.457526	NA	NA	2.98313	NA	-0.433362
NG_032999.1	CACNA1D	NA	NA	NA	NA	NA	NA	NA	NA	NA	NA	NA	NA
NG_033003.1	FARS2	0.539264	0.698919	-0.647003	-0.539139	0.662008	0.0771941	0.200384	0.901597	1.1912	1.26709	1.8146	1.90378
NG_033012.1	PNPT1	NA	NA	NA	NA	NA	NA	NA	NA	NA	NA	NA	NA
NG_033013.1	TYRO3	0.223213	0.275307	0.437313	0.455053	0.397314	0.622567	0.649075	0.485275	1.13474	1.14656	0.475265	0.497325
NG_033014.1	UNC13B	-1.3194	-1.32256	-1.24725	-1.2772	-1.31955	-0.508636	-0.511446	0.840503	1.30342	1.3247	0.408469	0.420827
NG_033017.1	MBTPS1	0.614496	0.786978	-1.17377	-1.66786	0.832032	0.817104	1.0413	-0.337977	1.1364	1.45566	0.81358	1.0283
NG_033030.1	MEGF8	NA	NA	NA	NA	NA	NA	NA	NA	NA	NA	NA	NA
NG_033031.1	RMND1	0.0358182	0.0917831	-1.98819	-1.93632	0.436479	0.87468	0.887492	-0.762681	0.987178	0.973771	0.850489	0.852624
NG_033032.1	CEP164	0.542009	0.619538	0.513654	0.556912	-0.54808	1.01281	1.04636	-1.73344	1.42179	1.41658	-1.81071	-1.65607
NG_033036.1	AAMP	-1.11227	-1.04553	0.3289	0.357521	1.28112	1.53199	1.57192	0.861615	-0.687905	-0.657799	1.33219	1.3572
NG_033040.1	MAP4K2	-0.584403	-0.737225	-1.33538	-1.65828	-0.550791	1.01783	1.1649	-0.408938	1.30417	1.49421	0.819149	0.922292
NG_033050.1	LHCGR	0.259657	0.238792	0.535963	0.554031	0.143097	0.175067	0.107097	0.380157	0.296283	0.240438	0.403623	0.388738
NG_033051.1	SNORD21	NA	NA	NA	NA	NA	NA	NA	NA	NA	NA	NA	NA
NG_033052.1	SERPIND1	NA	NA	NA	NA	NA	NA	NA	NA	NA	NA	NA	NA
NG_033067.1	PUS3	-0.231447	-0.126066	0.0365412	0.0793914	-2.52709	1.11832	1.1779	-0.750707	0.785134	0.81177	1.61427	1.65337
NG_033073.1	ANGPTL3	-1.29545	-1.17011	1.29023	1.35532	-0.932038	-0.933882	-0.838881	1.10056	-0.0309266	0.0337234	-0.953462	-0.869827
NG_033074.1	ISCA2	NA	NA	NA	NA	NA	NA	NA	NA	NA	NA	NA	NA
NG_033077.1	LRRN4CL	-0.939854	-1.17093	0.771433	0.849567	0.817047	0.790824	0.880558	0.800457	0.934374	1.0401	0.690619	0.755595
NG_033081.1	SLIT3	2.25786	2.40768	-0.0627342	0.00023997	-0.101626	0.201721	0.287329	-0.216214	-0.0160367	0.0388946	-0.926299	-0.875371
NG_033084.1	NR1D1	0.254397	0.285921	0.386209	0.391563	-2.71607	0.305194	0.318871	0.407212	0.0791503	0.0803901	0.460458	0.468798
NG_033097.1	USP20	0.479843	0.532639	-1.40586	-1.3684	-0.928967	1.21314	1.25428	-0.650937	1.40126	1.40576	1.0882	1.10403
NG_033099.1	BCS1L	NA	NA	NA	NA	NA	NA	NA	NA	NA	NA	NA	NA
NG_033102.1	TRAPPC11	0.277297	0.319643	-0.48408	-0.501392	-0.832463	0.609781	0.624748	0.705496	1.42085	1.41317	0.585931	0.585174
NG_033104.1	RTTN	-1.20614	-1.03322	-1.33934	-1.21153	0.436988	2.02273	2.06051	1.3407	1.38225	1.41163	-0.0294074	0.0617857
NG_033111.1	DOLK	0.60334	0.66903	-2.89451	-2.86643	0.381558	0.551741	0.592694	0.710531	1.62979	1.64678	0.75599	0.785523
NG_033122.1	KIZ	-0.934066	-0.77358	-0.976713	-0.86536	1.35412	-0.560878	-0.442763	-0.835892	1.58554	1.6118	0.985525	1.04439
NG_033127.1	DIXDC1	-0.0239181	0.0710415	1.11521	1.1359	0.117981	-1.29211	-1.17558	0.178923	0.341547	0.380056	-0.0733795	-0.0101977
NG_033144.1	PIGN	0.996822	1.11424	-2.15008	-2.02801	-0.350496	0.208914	0.306047	-0.794424	0.106711	0.174344	1.29994	1.36072
NG_033149.1	RUSF1	0.639381	0.677767	-0.0436851	-0.0384076	0.651001	0.932875	0.950643	0.677405	1.13327	1.13262	0.65404	0.663228
NG_033153.1	MFF	0.161068	NA	-0.881914	NA	NA	0.44607	NA	0.396935	0.72786	NA	0.457972	NA
NG_033169.1	PAK6	NA	NA	NA	NA	NA	NA	NA	NA	NA	NA	NA	NA
NG_033179.1	MICU1	0.644239	0.748886	-0.569659	-0.499998	1.12237	-0.0233032	0.0566799	1.15232	2.40595	2.45844	1.16743	1.23627
NG_033219.2	B3GALNT2	NA	NA	NA	NA	NA	NA	NA	NA	NA	NA	NA	NA
NG_033226.1	YTHDF3	NA	NA	NA	NA	NA	NA	NA	NA	NA	NA	NA	NA
NG_033239.1	MTOR	1.10047	1.16909	0.149082	0.165924	-0.295724	1.47871	1.53415	-0.856403	1.97832	2.04235	-0.600491	-0.601585
NG_033266.2	TSPYL1	-0.0960522	-0.0506912	0.814741	0.895057	0.116781	0.324115	0.380639	0.0826406	0.679023	0.74182	0.226506	0.264682
NG_033272.2	MIB1	-0.0812581	-0.0072157	0.0204203	0.0502824	0.0531115	0.243169	0.287157	0.449841	0.97114	0.986068	0.0772963	0.111831
NG_033796.2	SH2D1A	-1.42777	-1.32838	-0.973259	-0.930711	0.49881	-0.200654	-0.139125	-1.22161	1.64542	1.6772	-0.805376	-0.757121
NG_033800.1	POLD1	0.731296	0.822623	-0.861073	-0.790132	-0.646461	2.68876	2.73481	-0.721216	-0.0284414	0.0233964	1.14029	1.18741
NG_033804.1	SRGAP2	-0.0272221	0.0401319	0.614049	0.642685	0.102306	0.612243	0.657811	0.800499	1.47998	1.49974	0.712888	0.746397
NG_033805.1	DVL1P1	NA	NA	NA	NA	NA	NA	NA	NA	NA	NA	NA	NA
NG_033820.1	KDM2B	0.314366	0.387577	-0.554788	-0.543088	0.596	1.59936	1.62901	0.91585	0.708775	0.705028	-1.65051	-1.62818
NG_033830.1	HNRNPA1	NA	NA	NA	NA	NA	NA	NA	NA	NA	NA	NA	NA
NG_033836.2	AGBL1	0.393739	0.517941	-1.39083	-1.37693	-0.511977	-0.445804	-0.381323	-0.435521	-0.217255	-0.167424	1.20317	1.31837
NG_033837.1	CCDC65	NA	NA	NA	NA	NA	NA	NA	NA	NA	NA	NA	NA
NG_033841.1	ZBTB18	NA	-0.0320138	NA	-1.9619	0.566532	NA	0.746553	NA	NA	1.15633	NA	0.541357
NG_033843.1	DNAJC6	NA	NA	NA	NA	NA	NA	NA	NA	NA	NA	NA	NA
NG_033851.1	TCF12	0.38459	0.486598	1.03821	1.07834	0.811181	0.91264	0.972659	-1.28418	1.63012	1.64585	1.03397	1.0793
NG_033857.1	SLC35A3	0.193038	NA	0.728343	NA	NA	0.218216	NA	-0.298347	1.39288	NA	-1.40991	NA
NG_033858.1	DCHS1	NA	NA	NA	NA	NA	NA	NA	NA	NA	NA	NA	NA
NG_033866.1	GNAL	-0.616207	NA	0.131953	0.126598	NA	0.771842	NA	0.0482956	1.16944	1.53041	-0.430509	-0.632244
NG_033871.1	FBXO38	-0.426034	-0.693578	-0.270839	-0.511439	-0.537203	1.23895	1.60965	-0.489388	1.62643	2.11317	0.85064	1.04867
NG_033875.1	DDHD2	NA	NA	NA	NA	NA	NA	NA	NA	NA	NA	NA	NA
NG_033876.1	ADAM10	0.236862	0.304902	1.40909	1.41769	0.0129782	-0.5957	-0.544475	-1.85526	-1.15298	-1.1192	-0.0862847	-0.0531199
NG_033878.1	DPP6	NA	NA	NA	NA	NA	NA	NA	NA	NA	NA	NA	NA
NG_033879.1	PUF60	NA	NA	NA	NA	NA	NA	NA	NA	NA	NA	NA	NA
NG_033880.1	PTPRT	0.125785	0.232672	-0.913903	-0.859825	-0.321661	-0.614532	-0.538099	-0.63345	-0.0484017	0.0046361	-0.794449	-0.734113
NG_033882.1	ADCY5	NA	NA	NA	NA	NA	NA	NA	NA	NA	NA	NA	NA
NG_033884.1	KCNK3	NA	NA	NA	NA	NA	NA	NA	NA	NA	NA	NA	NA
NG_033885.1	RIT1	NA	NA	NA	NA	NA	NA	NA	NA	NA	NA	NA	NA
NG_033891.1	RAB28	0.239111	0.29216	0.904295	0.908274	-1.29003	0.756783	0.783239	1.28941	1.09655	1.09134	0.464172	0.476608
NG_033892.1	CTCF	-0.389384	-0.396984	-0.598757	-0.658805	0.0974723	0.833448	0.868348	-0.220176	-0.144025	-0.185951	1.98193	2.07312
NG_033893.1	MALT1	-0.300133	NA	-1.70934	NA	NA	0.150151	NA	-0.420162	1.90099	NA	1.39982	NA
NG_033896.1	TUBB4A	-0.521772	-0.468625	-0.0889772	-0.0664924	0.702617	0.579339	0.614841	0.669727	0.850439	0.862931	0.385045	0.409124
NG_033899.1	GBA2	-0.934276	-1.27517	1.04119	1.24265	1.15097	0.862704	1.02351	0.931098	-0.242547	-0.41791	-0.0058871	-0.10399
NG_033902.1	SNX10	0.251621	0.35711	0.9456	1.00435	0.147776	0.447982	0.520352	0.825592	0.451318	0.488548	0.407621	0.462102
NG_033906.1	POFUT1	-0.238703	-0.475547	-1.29335	-1.95389	-0.40868	0.248655	0.171851	1.04654	0.565035	0.585789	1.25825	1.54748
NG_033910.1	VPS45	1.03624	1.21183	-1.35073	-1.47288	1.44793	0.217002	0.280155	-0.339468	0.108826	0.140272	1.21177	1.37794
NG_033915.1	DUSP6	-0.356783	-0.603477	0.982588	1.2164	1.49977	-0.437993	-0.737433	-0.249859	1.56694	2.02151	0.463295	0.499257
NG_033932.1	TLN2	-0.310785	-0.229365	-0.923827	-0.868478	-0.64852	-0.101369	-0.0395376	1.82691	2.26778	2.29581	-0.371763	-0.3164
NG_033942.1	CDK9	-1.21415	-1.13394	-2.0549	-2.00503	0.4106	0.597017	0.613881	-0.405225	1.38594	1.36402	-1.26434	-1.22409
NG_033944.1	EPHA7	-0.508868	-0.381102	-0.821291	-0.73342	-0.5905	-0.515315	-0.418121	-0.880679	0.553893	0.607233	-0.731106	-0.639268
NG_033946.1	FNBP1	NA	NA	NA	NA	NA	NA	NA	NA	NA	NA	NA	NA
NG_033948.1	KMT2C	0.0294127	0.0980278	0.636092	0.672652	0.431568	0.641262	0.68962	1.07424	-1.23523	-1.20756	-0.399583	-0.360038
NG_033949.1	KMT2E	0.147346	0.250036	0.869688	0.927394	0.546174	0.0395107	0.110961	0.7285	-1.65463	-1.61992	0.185776	0.245073
NG_033950.2	ADGRL3	NA	-0.594602	NA	-2.15383	0.260435	NA	-0.216452	NA	NA	2.13541	NA	0.880912
NG_033952.1	MAP2K4	-0.407446	-0.311477	-1.57341	-1.51446	-0.402504	-0.0376573	0.0320157	-0.601807	2.36596	2.41037	1.95993	2.01621
NG_033956.1	NUP58	-0.0766601	0.13484	0.801704	0.940232	-0.313995	0.213242	0.364382	0.0145607	2.39253	2.6202	1.15105	1.33012
NG_033960.1	PCMT1	1.21578	1.21971	-0.965956	-0.944618	-0.594385	1.54827	1.52764	1.49107	1.46168	1.4291	-0.845151	-0.822989
NG_033961.1	PDCD6IP	NA	NA	NA	NA	NA	NA	NA	NA	NA	NA	NA	NA
NG_033962.2	PDZD2	1.02996	1.09397	-1.27058	-1.25646	0.0109621	-0.951228	-0.91831	-0.959236	-0.727194	-0.716701	1.57209	1.60831
NG_033963.1	PTPRD	-0.760507	-0.688039	-1.93168	-1.94527	0.746844	1.21632	1.31544	0.657705	1.22205	1.28214	-0.815914	-0.792902
NG_033964.1	PTPRS	0.680997	0.776587	0.659494	0.715426	0.649497	0.476527	0.548424	0.280504	0.5855	0.634625	0.303165	0.369843
NG_033965.1	PTPRU	NA	NA	NA	NA	NA	NA	NA	NA	NA	NA	NA	NA
NG_033980.1	SMG6	0.845378	0.921623	-0.867802	-0.792219	1.07741	-0.37545	-0.297638	1.01008	1.56605	1.58945	0.92533	0.972229
NG_033983.1	AKAP5	NA	NA	NA	NA	NA	NA	NA	NA	NA	NA	NA	NA
NG_033985.1	ATL3	NA	NA	NA	NA	NA	NA	NA	NA	NA	NA	NA	NA
NG_033998.1	SVIL	0.191272	0.245801	-0.939461	-0.901383	0.0315104	-0.321463	-0.281407	-0.453867	1.2764	1.28977	-1.23593	-1.19244
NG_034001.1	ARHGEF40	-1.77391	-1.65368	0.170811	0.225282	0.764174	0.739611	0.801141	0.580281	0.903618	0.939361	0.41153	0.46662
NG_034007.1	RPS6KL1	0.162003	0.189385	-1.39564	-1.38504	0.15468	0.346438	0.35643	0.296641	0.466731	0.461269	0.323312	0.326513
NG_034014.1	CDK2	NA	NA	NA	NA	NA	NA	NA	NA	NA	NA	NA	NA
NG_034016.1	REPS1	NA	NA	NA	NA	NA	NA	NA	NA	NA	NA	NA	NA
NG_034020.1	HMGB1P4	NA	NA	NA	NA	NA	NA	NA	NA	NA	NA	NA	NA
NG_034024.1	DNAJB11	-0.555799	-0.487908	-0.543662	-0.517252	-0.371281	2.43966	2.35805	-0.335776	0.375518	0.350284	-0.341722	-0.319727
NG_034030.1	EFCAB2	NA	NA	NA	NA	NA	NA	NA	NA	NA	NA	NA	NA
NG_034036.1	MAST4	0.102349	0.231825	-0.528186	-0.450372	0.132033	-0.17031	-0.073862	-0.982289	0.104076	0.171832	0.996844	1.07911
NG_034037.1	PEAK1	0.469839	0.563399	-1.58712	-1.52373	-0.664546	-0.903624	-0.83401	0.797482	0.670558	0.714393	0.80616	0.861763
NG_034039.1	DOCK10	0.247638	0.334105	-0.862228	-0.813578	0.719699	0.851714	0.888184	0.682613	1.59598	1.57376	-1.11258	-1.05064
NG_034041.1	SORBS1	-0.548229	-0.426744	0.343768	0.401334	0.267436	0.681495	0.752629	0.262554	1.24854	1.27841	0.507534	0.56708
NG_034051.1	DYNC2I1	-0.198154	-0.121743	-0.906645	-0.850491	1.16419	1.18392	1.23942	0.617664	0.910501	0.94938	0.463749	0.51515
NG_034053.1	EIF2AK4	0.274826	0.350857	1.26641	1.30998	0.389793	0.791997	0.847689	-0.180853	0.786792	0.819167	0.0976048	0.136608
NG_034054.1	PTDSS1	-0.985744	NA	-0.803992	NA	NA	-0.915058	NA	-0.733586	1.04814	NA	0.970937	NA
NG_034055.1	CDIN1	1.16711	1.38257	-0.819494	-0.789359	0.416076	0.234535	0.356352	-0.48095	-0.671494	-0.641918	1.12054	1.29135
NG_034057.2	TBCK	NA	NA	NA	NA	NA	NA	NA	NA	NA	NA	NA	NA
NG_034062.1	KCNH5	1.84922	1.9276	-1.58137	-1.49432	-0.305594	-0.859341	-0.756473	0.153874	-0.520982	-0.461726	-0.398733	-0.323685
NG_034067.1	DEPDC5	0.580247	0.677331	-1.55495	-1.50058	-0.717347	1.53795	1.61844	-0.558777	-0.187972	-0.137244	1.33709	1.40129
NG_034068.1	IFT172	-0.414463	-0.101511	-0.154751	0.0202964	0.15349	0.439014	0.543549	-0.401456	0.564662	0.597855	-1.14018	-0.783327
NG_034070.1	CACNA2D2	NA	NA	NA	NA	NA	NA	NA	NA	NA	NA	NA	NA
NG_034072.1	CTNNA3	-0.747301	-0.657274	-2.59	-2.57212	-1.62502	0.730338	0.746103	-0.827052	1.11144	1.07318	0.682253	0.675995
NG_034075.1	AMPD2	NA	NA	NA	NA	NA	NA	NA	NA	NA	NA	NA	NA
NG_034077.1	MARS1	0.864357	0.913835	-1.47446	-1.44027	0.956235	1.04374	1.07524	0.855403	1.08108	1.10077	0.848655	0.877457
NG_034086.1	ELP4	1.87892	1.92791	0.305359	0.310711	-0.810678	-0.557891	-0.513449	-0.376612	0.118692	0.112355	-0.978372	-0.953016
NG_034098.1	PLD3	NA	NA	NA	NA	NA	NA	NA	NA	NA	NA	NA	NA
NG_034100.1	CSPP1	0.799686	0.880682	0.739058	0.775154	0.291656	0.668835	0.725856	0.465395	0.478896	0.508614	0.204324	0.245145
NG_034107.1	ERCC6L2	NA	NA	NA	NA	NA	NA	NA	NA	NA	NA	NA	NA
NG_034108.1	OXSM	0.640916	0.794701	-0.664988	-0.690965	1.14426	1.47577	1.66047	0.622334	0.0751826	0.106318	-0.930947	-0.974194
NG_034113.1	GRID2	-0.503288	-0.300234	0.0480298	0.146704	-0.57686	0.22691	0.344591	-0.123469	1.78177	1.78058	0.599898	0.68035
NG_034115.1	POGLUT1	NA	NA	NA	NA	NA	NA	NA	NA	NA	NA	NA	NA
NG_034119.1	NR2F1	NA	NA	NA	NA	NA	NA	NA	NA	NA	NA	NA	NA
NG_034120.1	HFM1	0.943462	1.03253	0.599919	0.652291	0.0618898	-1.06235	-0.966638	-0.0947535	0.278746	0.328942	1.10609	1.15465
NG_034123.1	TNRC18	NA	NA	NA	NA	NA	NA	NA	NA	NA	NA	NA	NA
NG_034127.1	SPOCK1	-0.367687	-0.319994	-1.39092	-1.35738	-0.212243	-0.836264	-0.800338	-0.873509	-0.30265	-0.291557	0.665698	0.670876
NG_034132.1	SETD5	0.00914244	0.0925136	0.400602	0.422523	0.00575717	0.157965	0.204518	0.246009	1.66413	1.67374	0.536728	0.565471
NG_034133.1	AUTS2	-0.807928	-0.612033	0.759236	0.844859	-0.867039	1.08174	1.1932	-1.27062	0.177507	0.266769	0.67367	0.769806
NG_034145.1	DYRK1B	NA	NA	NA	NA	NA	NA	NA	NA	NA	NA	NA	NA
NG_034149.1	DARS1	0.774635	0.84697	0.336343	0.378866	0.803811	1.15209	1.19436	-0.55958	1.81834	1.82395	1.35591	1.38203
NG_034153.2	RUBCN	NA	NA	NA	NA	NA	NA	NA	NA	NA	NA	NA	NA
NG_034154.1	DCAF8	-0.972344	-0.932053	-2.57611	-2.67856	0.500399	0.123728	0.180034	-0.987608	0.522056	0.555576	0.765972	0.833701
NG_034158.1	AHDC1	0.584744	0.664299	-2.65402	-2.488	0.430016	-0.432021	-0.340168	0.33448	1.14599	1.15574	0.919409	0.949707
NG_034164.1	STT3B	1.73241	1.87072	-0.568908	-0.617163	2.0469	-0.508957	-0.53337	2.20079	0.467297	0.470507	-0.251121	-0.2748
NG_034197.1	PPP1R9B	0.471012	0.519958	0.430538	0.449389	-1.6197	0.748112	0.782425	0.426601	1.55257	1.58152	-0.466885	-0.457022
NG_034198.1	ADCY1	-0.223069	-0.108566	0.48905	0.522388	0.12669	0.0659831	0.13913	0.233279	0.978537	0.977758	0.308845	0.356871
NG_034199.1	ABCA5	-0.379355	-0.615662	-0.816111	-1.27569	1.44583	0.0821622	0.00670481	-0.201891	1.42836	1.88329	1.25099	1.64517
NG_034200.1	ADNP	NA	NA	NA	NA	NA	NA	NA	NA	NA	NA	NA	NA
NG_034202.1	SCLT1	0.721662	0.778045	-2.09656	-1.94039	0.4291	0.00961026	0.0737734	1.30856	0.365291	0.39485	1.49169	1.47923
NG_034203.1	TBC1D32	NA	NA	NA	NA	NA	NA	NA	NA	NA	NA	NA	NA
NG_034205.1	IFT27	NA	NA	NA	NA	NA	NA	NA	NA	NA	NA	NA	NA
NG_034224.1	VARS2	-0.608353	-0.565341	-1.22463	-1.20231	-1.18707	1.55314	1.58293	-0.576486	-0.0239346	-0.0111947	1.17532	1.19098
NG_034230.1	KCND2	0.150474	0.338502	-0.79016	-0.671028	0.0904181	-0.161312	-0.0168771	0.42782	0.903833	0.997899	-0.844139	-0.715637
NG_034246.1	LIPE	0.429952	0.48733	-0.982831	-0.951121	-0.601646	0.83037	0.870075	0.631838	0.968794	0.989497	0.32928	0.360357
NG_034254.1	CCND2	-0.191356	-0.146798	1.17721	1.19587	-0.574625	-0.400433	-0.381033	-0.118444	1.75516	1.77121	1.41117	1.43566
NG_034260.1	COL27A1	-0.655024	-0.562465	-0.4648	-0.408845	-0.235171	-0.0818247	-0.0160866	-0.179471	2.33841	2.36258	-0.476938	-0.416514
NG_034265.1	SLC39A5	0.137585	0.197532	-0.892299	-0.857031	1.09886	-1.11542	-1.06737	-0.671812	0.085507	0.104349	0.920688	0.941462
NG_041778.1	BBIP1	-0.6903	-0.463962	1.37864	1.34209	-0.279595	0.237734	0.337296	0.110937	0.0518217	0.132765	0.552559	0.603744
NG_041781.2	KCNB1	0.692572	0.737325	0.214289	0.229519	0.538746	0.302621	0.329565	0.215017	2.02523	1.99109	1.45204	1.4414
NG_041782.1	TREX1	2.32138	2.38272	-0.922543	-0.873363	-0.570875	-0.137577	-0.0806138	-0.790378	0.176835	0.210488	-0.652566	-0.601067
NG_041784.1	NADK2	-0.557121	-0.615905	-1.31906	-1.44402	-1.65917	1.04939	1.0375	0.894297	-0.10822	-0.196429	0.178257	0.113847
NG_041788.1	ANXA2P1	NA	NA	NA	NA	NA	NA	NA	NA	NA	NA	NA	NA
NG_041791.1	C2CD3	0.00464066	0.114763	0.537912	0.585863	-1.02242	-0.519556	-0.420853	0.775653	1.27507	1.29014	0.897781	0.938716
NG_041797.1	ZNF277	NA	NA	NA	NA	NA	NA	NA	NA	NA	NA	NA	NA
NG_041799.1	IARS2	-0.624302	-0.826006	-0.648444	-0.88374	-0.897958	1.3421	1.52897	-0.305632	1.47382	1.66456	1.29271	1.45529
NG_041804.1	DNAL4	-0.080346	-0.0061628	-1.28925	-1.21833	-0.562618	0.568577	0.594415	-0.335313	-0.0229972	-0.003524	-0.604117	-0.551412
NG_041806.1	NDST1	0.597635	0.666672	-1.29655	-1.21265	-0.581045	0.0502908	0.115326	0.989363	1.25013	1.27727	1.02462	1.06465
NG_041813.1	PURA	NA	NA	NA	NA	NA	NA	NA	NA	NA	NA	NA	NA
NG_041815.1	SPOP	-1.97366	NA	0.517836	NA	NA	0.364361	NA	0.70979	0.858225	NA	0.565274	NA
NG_041822.1	ASF1A	0.240329	0.364132	1.20071	1.27996	-0.651267	1.3469	1.44853	-0.97838	1.59927	1.67198	-0.828395	-0.757232
NG_041826.1	FAR1	NA	NA	NA	NA	NA	NA	NA	NA	NA	NA	NA	NA
NG_041827.1	KCNC1	-0.13517	-0.203569	-0.37548	-0.573798	0.964576	0.00114688	-0.0589471	-1.31206	1.6337	2.05604	1.09933	1.37087
NG_041829.1	STX1B	0.290279	0.311459	-2.57957	-2.96362	0.244814	0.179404	0.172233	0.741486	0.770947	0.823911	0.278171	0.275977
NG_041837.1	TGDS	NA	NA	NA	NA	NA	NA	NA	NA	NA	NA	NA	NA
NG_041938.1	KCNH7	0.808667	1.12133	-0.691011	-0.598874	0.9573	0.467508	0.687274	0.497295	1.10999	1.31654	-0.70309	-0.599471
NG_041939.1	CCND3	1.20186	1.24328	-0.501326	-0.475928	-0.222049	-0.629968	-0.591334	1.39919	1.02748	1.0289	1.5717	1.57693
NG_041943.1	GPATCH8	NA	NA	NA	NA	NA	NA	NA	NA	NA	NA	NA	NA
NG_042046.1	NARS2	0.523238	0.588696	-0.709875	-0.677122	-0.0586192	1.35272	1.39724	-0.124349	1.70691	1.73375	0.159723	0.196492
NG_042051.1	KLHL41	NA	NA	NA	NA	NA	NA	NA	NA	NA	NA	NA	NA
NG_042054.1	FMN2	-0.852618	-0.754319	-1.23404	-1.18031	1.2233	1.37035	1.31928	-0.839922	-0.509597	-0.499581	-0.626628	-0.593741
NG_042060.1	CIC	0.438221	NA	-2.27815	NA	NA	0.309907	NA	0.897362	0.318428	NA	0.539303	NA
NG_042064.1	PTRH2	-0.175977	-0.185675	-0.506405	-0.587407	-1.60516	-0.140335	-0.173622	-0.362616	1.54029	1.63627	-0.139544	-0.182404
NG_042065.1	CALM2	NA	NA	NA	NA	NA	NA	NA	NA	NA	NA	NA	NA
NG_042093.1	KAT6A	-0.153188	-0.0585226	0.479886	0.519807	0.0695466	0.704922	0.750351	1.09188	1.46237	1.46797	1.69053	1.70094
NG_042104.1	PODXL	0.83848	0.901499	-2.94419	-2.91498	-0.7262	-0.1552	-0.102744	0.838429	0.0174793	0.0533054	-0.133164	-0.0880019
NG_042125.1	CEP120	-0.205044	-0.105983	0.0270069	0.0832338	-0.904571	-0.440133	-0.370878	1.66506	1.76928	1.8336	-0.764007	-0.710141
NG_042142.1	ITPR2	1.20257	1.35559	-0.558071	-0.465876	-0.244722	1.09542	1.21265	1.16416	1.64605	1.73131	0.0953045	0.195123
NG_042166.1	ADCY6	NA	NA	NA	NA	NA	NA	NA	NA	NA	NA	NA	NA
NG_042168.1	TUBGCP4	NA	NA	NA	NA	NA	NA	NA	NA	NA	NA	NA	NA
NG_042176.1	HPCA	-0.0669977	-0.0531323	-2.19712	-2.28276	0.88763	0.819068	0.847469	-0.790123	-0.703212	-0.745465	0.751419	0.765551
NG_042180.1	LRMDA	0.245414	0.419058	-0.300332	-0.204402	1.38637	0.168589	0.301134	-0.04045	-1.55655	-1.51167	-1.66278	-1.60247
NG_042181.1	COL12A1	-1.68183	-1.62861	-1.60032	-1.61214	-1.33444	-1.61807	-1.60407	1.65386	-0.596549	-0.595531	-0.153179	-0.121686
NG_042185.1	KIF2A	NA	NA	NA	NA	NA	NA	NA	NA	NA	NA	NA	NA
NG_042187.1	RASA2	NA	0.373666	NA	-0.293532	0.104769	NA	-0.518268	NA	NA	1.82078	NA	1.09122
NG_042194.1	GRIK4	0.578399	0.706592	-1.58895	-1.53967	0.952034	1.47607	1.58733	-1.43506	1.61542	1.70043	-0.891615	-0.827036
NG_042216.1	KIF5C	NA	NA	NA	NA	NA	NA	NA	NA	NA	NA	NA	NA
NG_042223.1	TUBB2A	0.259858	0.292221	0.102753	0.095222	-2.13559	0.479634	0.498906	0.0132508	0.692638	0.696911	0.56525	0.57532
NG_042228.1	UQCRC2	NA	NA	NA	NA	NA	NA	NA	NA	NA	NA	NA	NA
NG_042234.1	PSME2	-1.77295	-1.68482	1.27317	1.25605	-1.92204	0.825364	0.838526	0.602892	-0.697277	-0.674338	0.551476	0.55674
NG_042268.1	RPN2	0.886433	0.965784	-1.81328	-1.79224	-1.05112	1.39568	1.4546	1.04461	1.87587	1.91673	1.03666	1.08298
NG_042271.1	CACNA1B	NA	NA	NA	NA	NA	NA	NA	NA	NA	NA	NA	NA
NG_042272.1	NT5C2	-1.44626	-1.35155	-1.66596	-1.60728	-0.0667914	0.468367	0.535727	-0.194707	-0.969153	-0.922428	-0.286602	-0.229976
NG_042273.1	PHC1	NA	NA	NA	NA	NA	NA	NA	NA	NA	NA	NA	NA
NG_042277.1	VPS54	0.182812	0.246577	-1.63274	-1.59637	0.279024	-0.930817	-0.882151	0.346983	-0.789849	-0.766721	-1.09729	-1.05997
NG_042279.2	NDUFA8	-0.830322	-0.794991	1.18504	1.20535	-0.947325	1.13786	1.17047	-0.773128	-0.44696	-0.440948	0.953401	0.975705
NG_042283.1	PPT2	0.17136	0.23111	-0.0298619	-0.0118496	1.35019	0.406837	0.445605	0.139944	-1.84331	-1.86152	1.25315	1.29621
NG_042284.1	SMAD1	0.155049	0.234632	-2.86755	-2.88251	0.162894	-0.680415	-0.641377	0.049351	1.67461	1.7118	-0.368966	-0.343413
NG_042285.1	CHGB	NA	NA	NA	NA	NA	NA	NA	NA	NA	NA	NA	NA
NG_042286.1	SLC12A2	0.950651	NA	-0.682387	NA	NA	0.422535	NA	2.06333	-0.410702	NA	2.13747	NA
NG_042289.1	SCN3A	NA	NA	NA	NA	NA	NA	NA	NA	NA	NA	NA	NA
NG_042292.1	KCNAB1	NA	NA	NA	NA	NA	NA	NA	NA	NA	NA	NA	NA
NG_042293.1	UTRN	-0.3898	-0.643182	-0.133009	-0.323617	1.41649	-0.610767	-0.975844	-0.546231	0.932384	1.14982	-0.468489	-0.785323
NG_042305.1	MYH10	0.952858	1.00229	-1.05817	-1.0442	-0.577047	1.61266	1.64385	-0.582974	-0.0105468	0.00588858	1.2964	1.33104
NG_042309.1	KCNA4	-2.38249	NA	-0.997994	NA	NA	0.214628	NA	0.551232	0.94317	NA	1.35197	NA
NG_042789.1	SLMAP	0.400602	0.47729	-1.44476	-1.38973	0.455739	1.03452	1.08342	1.08726	1.54142	1.56161	1.15552	1.19014
NG_042800.1	GNAO1	NA	NA	NA	NA	NA	NA	NA	NA	NA	NA	NA	NA
NG_042806.1	STT3A	NA	NA	NA	NA	NA	NA	NA	NA	NA	NA	NA	NA
NG_042807.1	NR2E1	0.486179	0.526434	0.13253	0.132856	0.780711	-1.5742	-1.51175	-1.01965	1.21241	1.17719	-0.405199	-0.385917
NG_042810.1	MPDZ	0.445427	0.460998	-2.15308	-2.12494	0.163017	0.641889	0.627809	-1.26727	1.13463	1.08662	0.881903	0.851477
NG_042815.1	CFAP53	-0.891034	-0.785427	0.250942	0.306242	-0.778617	-0.0429096	0.0312957	-0.0096159	-1.78331	-1.74262	0.0624651	0.123594
NG_042818.1	CLMP	-0.812341	-1.28666	-0.0680353	-0.230538	-0.497874	0.411962	0.496519	0.262175	1.58311	2.19352	0.035585	-0.0724631
NG_042821.1	NTNG1	0.650986	0.79709	0.668491	0.75319	0.942002	-0.915788	-0.816068	0.903857	-0.0553339	0.0144426	0.984405	1.07774
NG_042822.1	TRIT1	-0.705512	-1.318	0.605492	0.802166	-1.35911	0.457788	0.580931	0.376039	0.964779	1.38366	0.277138	0.268459
NG_042828.1	ZMYND10	-1.36919	NA	-0.333653	NA	NA	-1.67511	NA	-0.579242	1.79531	NA	1.35431	NA
NG_042829.1	EOGT	NA	NA	NA	NA	NA	NA	NA	NA	NA	NA	NA	NA
NG_042830.1	ACKR4	0.945559	1.03371	-1.52397	-1.44919	-0.0156237	1.47405	1.53388	-0.757753	1.52396	1.55843	0.621954	0.677677
NG_042832.1	DDHD1	-0.421395	-0.356542	-0.815381	-0.806436	0.0666323	1.51377	1.59264	-0.162276	1.81873	1.88315	0.321435	0.363215
NG_042838.1	EPG5	-0.182818	-0.0524753	-0.843713	-0.737124	0.221962	-0.247636	-0.144892	0.351561	2.7566	2.73029	0.120298	0.199061
NG_042850.1	TBC1D4	1.06754	1.13755	0.549879	0.554284	1.23437	0.745134	0.775651	-0.394589	-0.68041	-0.728746	1.42992	1.4714
NG_042851.1	TECPR2	NA	NA	NA	NA	NA	NA	NA	NA	NA	NA	NA	NA
NG_042855.1	ATP8A2	NA	NA	NA	NA	NA	NA	NA	NA	NA	NA	NA	NA
NG_042859.1	TENM3	-0.461135	-0.347055	-1.1896	-1.1191	-0.443174	-0.639177	-0.549528	1.83789	0.0212787	0.0873531	-1.09607	-1.02068
NG_042863.1	FMN1	1.39204	1.56918	-1.49349	-1.31574	1.08699	-0.301628	-0.124227	0.155061	1.17567	1.26091	-1.9541	-1.75305
NG_042874.1	PARD6A	NA	NA	NA	NA	NA	NA	NA	NA	NA	NA	NA	NA
NG_044984.2	PPIE	-0.327206	-0.210798	-1.79917	-1.6461	1.01138	0.481513	0.533139	0.511572	0.151036	0.198244	0.565732	0.603261
NG_044999.1	INPP5F	NA	NA	NA	NA	NA	NA	NA	NA	NA	NA	NA	NA
NG_045000.3	MEG8	NA	NA	NA	NA	NA	NA	NA	NA	NA	NA	NA	NA
NG_045002.3	GET1	NA	NA	NA	NA	NA	NA	NA	NA	NA	NA	NA	NA
NG_045219.1	ZDBF2	0.148041	0.251828	-0.852038	-0.802551	-0.211412	-0.119473	-0.043446	-0.614474	1.57356	1.64999	1.56804	1.65599
NG_046155.1	WDR27	-1.76439	-1.65281	0.109258	0.199088	-0.0038827	0.543093	0.711972	0.536824	1.8264	1.97104	0.751531	0.885791
NG_046164.1	PARL	-0.638787	-0.595635	-0.716179	-0.699892	-0.952412	0.855247	0.885966	-1.10143	1.58643	1.59739	-0.800463	-0.780802
NG_046331.1	JPH1	-1.43116	-1.35411	0.255387	0.274918	0.0749795	-1.12166	-1.07102	-1.3968	1.00637	1.00908	0.352862	0.375131
NG_046341.1	SLC12A5	-0.637188	-0.61675	-2.39306	-2.38866	0.518126	0.600592	0.596163	0.624041	1.20372	1.1753	0.653996	0.639189
NG_046342.1	RSPRY1	1.31851	1.4101	0.936649	0.991497	-1.08133	1.8547	1.92886	-1.15235	1.14722	1.19727	0.489367	0.545172
NG_046601.1	POGZ	NA	NA	NA	NA	NA	NA	NA	NA	NA	NA	NA	NA
NG_046603.1	WAC	-1.00797	-0.909164	-1.88526	-1.80501	-0.520775	0.961624	0.997882	0.846816	1.02833	1.04823	0.826457	0.859691
NG_046695.1	TRAIP	-1.38369	-1.24933	-0.831275	-0.766945	0.908184	-1.19753	-1.09391	0.929588	0.91346	0.811597	1.13252	1.017
NG_046725.1	PRDM8	0.156053	0.190758	-1.92527	-1.94557	0.925362	0.33406	0.337093	-0.598356	0.296322	0.269476	-0.917107	-0.930067
NG_046730.1	SIPA1L3	0.679408	0.762371	-1.1621	-1.09619	0.158831	0.985216	1.04626	-0.694171	1.69776	1.72705	-0.931057	-0.863842
NG_046731.1	KATNIP	NA	NA	NA	NA	NA	NA	NA	NA	NA	NA	NA	NA
NG_046742.1	NONO	-0.0132663	0.0184301	0.140855	0.137274	0.365669	0.416908	0.424007	-1.80769	1.44426	1.41824	0.526769	0.522208
NG_046752.1	MORC2	NA	NA	NA	NA	NA	NA	NA	NA	NA	NA	NA	NA
NG_046771.1	COA3	-1.30374	-1.80238	-0.719912	-1.0511	0.605712	0.666195	0.780962	0.721868	0.943766	1.12044	0.542235	0.603925
NG_046780.1	PGAP1	-0.623847	-0.595919	-2.16169	-2.20916	-0.0510446	0.735704	0.767162	1.23476	-0.796934	-0.8207	-0.340628	-0.342534
NG_046782.1	HACE1	NA	NA	NA	NA	NA	NA	NA	NA	NA	NA	NA	NA
NG_046847.1	USP7	NA	NA	NA	NA	NA	NA	NA	NA	NA	NA	NA	NA
NG_046848.1	TRIP4	-0.41233	-0.371285	0.987935	1.05535	1.15104	1.41071	1.5282	0.86611	-0.0726038	-0.0779112	-0.489654	-0.502452
NG_046850.1	PER3	NA	NA	NA	NA	NA	NA	NA	NA	NA	NA	NA	NA
NG_046859.1	OVOL2	-1.11476	-1.05839	-0.115321	-0.0897217	-1.71422	-1.53587	-1.51661	0.56883	0.544247	0.566195	1.22775	1.26935
NG_046860.1	DVL3	NA	NA	NA	NA	NA	NA	NA	NA	NA	NA	NA	NA
NG_046885.1	AASDH	0.2478	NA	-1.4415	NA	NA	0.700384	NA	0.463958	0.750946	NA	0.585305	NA
NG_046902.1	TSPAN5	-0.136415	NA	-0.0926205	NA	NA	0.5675	NA	0.314919	0.397527	NA	0.495862	NA
NG_046904.1	TBR1	-0.129885	NA	-3.33819	NA	NA	0.257879	NA	0.38027	1.41047	NA	0.0979059	NA
NG_046905.1	NDST2	-0.470809	-0.402587	-3.17581	-3.16434	0.654629	0.2716	0.323222	0.722013	1.07215	1.10134	0.341511	0.379402
NG_046908.1	YY1	-0.0973155	0.00021261	-1.82636	-1.75511	0.238757	0.286382	0.351225	-1.80181	1.49771	1.52776	0.766395	0.81679
NG_046913.1	ADCY2	0.0698582	0.129056	-1.46705	-1.42175	-0.466371	1.44043	1.45312	-0.941607	-0.921497	-0.893457	1.30624	1.3066
NG_046914.1	DAB1	0.210447	0.30164	-0.799462	-0.773226	-1.19221	-0.349331	-0.298928	0.800027	1.64886	1.69334	-0.296133	-0.257923
NG_046915.1	PPP1R13B	NA	NA	NA	NA	NA	NA	NA	NA	NA	NA	NA	NA
NG_046917.1	WDFY3	NA	NA	NA	NA	NA	NA	NA	NA	NA	NA	NA	NA
NG_046919.1	NLGN1	0.597588	0.788868	0.526249	0.627534	0.490419	0.682517	0.816313	-0.476823	2.11566	2.20662	-0.43201	-0.324
NG_046922.1	MAML1	NA	NA	NA	NA	NA	NA	NA	NA	NA	NA	NA	NA
NG_046923.1	ZHX3	NA	NA	NA	NA	NA	NA	NA	NA	NA	NA	NA	NA
NG_046926.1	RORB	NA	NA	NA	NA	NA	NA	NA	NA	NA	NA	NA	NA
NG_046930.1	UVRAG	0.258374	0.3944	1.20169	1.26935	-0.0942076	1.16351	1.25057	-0.924437	0.29351	0.361985	-0.183448	-0.0918188
NG_046934.1	HAUS3	NA	0.0978998	NA	-0.290775	0.0872602	NA	0.108563	NA	NA	2.08584	NA	-0.23339
NG_046937.1	SF3B3	NA	NA	NA	NA	NA	NA	NA	NA	NA	NA	NA	NA
NG_046942.1	ST3GAL2	NA	NA	NA	NA	NA	NA	NA	NA	NA	NA	NA	NA
NG_046944.1	HLF	-0.580336	-0.532926	-0.656075	-0.634464	-0.829038	-0.478004	-0.453148	1.5389	2.12805	2.03694	1.57775	1.51686
NG_046946.1	AKAP8	0.374412	0.553242	0.211483	0.226371	-0.302485	0.579707	0.877169	-0.0196922	0.625305	0.937311	0.0633713	-0.0256453
NG_046947.1	KATNB1	0.588581	0.647855	-0.906149	-0.870571	0.945069	1.19457	1.23579	0.898386	1.332	1.35394	-0.384378	-0.347572
NG_046948.1	MED13	0.478045	0.569831	-1.75104	-1.68625	-0.448331	0.0928592	0.160731	1.30323	0.146088	0.189074	-0.872354	-0.808612
NG_046950.1	ZNF804A	1.27902	1.4105	0.326201	0.406954	-0.289852	0.0670861	0.170324	-0.119932	1.4391	1.50435	-0.0869779	0.00230483
NG_046951.1	ZHX2	0.266305	0.40953	0.390365	0.474208	0.639669	1.37841	1.46898	1.31945	-0.990815	-0.89648	-0.336863	-0.23529
NG_046958.1	HERC1	0.391083	0.450393	-0.122811	-0.105894	0.47141	0.833736	0.861202	0.776255	1.35298	1.35114	-1.58781	-1.55532
NG_046966.1	ARAP3	NA	NA	NA	NA	NA	NA	NA	NA	NA	NA	NA	NA
NG_046969.1	IGHEP2	0.789523	0.921976	0.758644	0.862889	0.164664	-0.395043	-0.523837	0.581197	0.176991	0.150294	0.736259	0.839011
NG_046971.1	TRHDE	-0.93901	-0.837773	-1.18432	-1.12983	-0.577015	1.47699	1.52482	0.264748	1.87108	1.87504	1.0108	1.04255
NG_046972.1	SLC25A16	NA	NA	NA	NA	NA	NA	NA	NA	NA	NA	NA	NA
NG_046979.1	FAT2	NA	NA	NA	NA	NA	NA	NA	NA	NA	NA	NA	NA
NG_046983.1	CREB3	0.868706	0.89786	-0.664397	-0.64375	-0.519492	0.825792	0.842096	0.945592	-0.166356	-0.149695	-1.05607	-1.03298
NG_046985.1	KLHL20	-0.565945	-0.501048	-1.08862	-1.06199	0.206526	0.50824	0.525415	0.612652	2.05976	2.02228	-0.815731	-0.788251
NG_046987.1	DDX10	0.216331	0.290883	-0.539768	-0.496105	0.513463	0.0888323	0.146387	-0.184455	0.767173	0.813611	-0.103702	-0.0544291
NG_046988.1	E2F1	NA	NA	NA	NA	NA	NA	NA	NA	NA	NA	NA	NA
NG_046989.1	MMP14	-0.29714	-0.215481	-0.904431	-0.862919	-0.565449	0.704732	0.764357	0.79825	-0.813893	-0.780027	-0.736932	-0.69057
NG_046993.1	KDM5A	1.19402	1.26479	-1.89638	-1.91703	1.31158	0.257225	0.290388	0.27553	1.98087	2.02757	-1.51228	-1.52106
NG_046994.1	FAT1	0.313092	0.374698	0.0872843	0.117089	-1.28345	0.671357	0.715358	-0.991147	1.35603	1.38028	0.742919	0.776242
NG_047000.1	PTGER4	0.130517	0.206773	1.22348	1.22577	-0.970289	0.491075	0.531564	-0.909116	1.0179	1.02241	-1.02115	-0.926158
NG_047001.1	PHF2	NA	NA	NA	NA	NA	NA	NA	NA	NA	NA	NA	NA
NG_047002.1	RNF20	0.373621	0.452813	-0.798011	-0.739082	-0.305703	0.172129	0.231193	-0.265115	-0.0498131	-0.0081719	2.02605	2.0492
NG_047003.1	APPL1	-0.219073	-0.104002	0.583715	0.61878	-0.190615	0.68826	0.737006	0.435554	1.26255	1.25989	0.515278	0.558575
NG_047004.1	HIVEP2	NA	NA	NA	NA	NA	NA	NA	NA	NA	NA	NA	NA
NG_047012.1	ATP6V1A	-0.551721	-0.529296	-1.41832	-1.44444	0.803253	-0.141528	-0.128194	-0.968054	1.27744	1.30863	0.960789	0.99197
NG_047013.1	ATP6V1B2	-1.18692	NA	0.704099	NA	NA	0.6954	NA	-0.828172	0.963878	NA	0.655881	NA
NG_047014.1	ARHGAP35	-0.1496	-0.0536218	-0.947244	-0.892305	-0.0861495	-0.128726	-0.0581604	-0.651971	0.914592	0.962969	2.97307	3.03449
NG_047017.1	BDP1	NA	NA	NA	NA	NA	NA	NA	NA	NA	NA	NA	NA
NG_047018.1	HDAC1	-0.639427	-0.883282	-0.723317	-1.02095	1.91904	-0.281115	-0.455604	-0.540195	0.0496092	-0.0605456	0.529358	0.548
NG_047022.1	PREX2	2.20446	2.31344	-1.35592	-1.28025	-0.684081	0.491	0.574839	0.738257	0.929145	0.983251	0.302178	0.373184
NG_047026.1	EIF4G3	1.26309	1.32789	-0.494193	-0.489847	-0.427863	1.53422	1.58305	0.59461	0.158465	0.171386	-0.806087	-0.804943
NG_047029.1	CTNNA1	0.0731104	0.164833	-1.67514	-1.61547	0.382027	1.15165	1.21078	1.04368	-1.00904	-0.960207	-1.49446	-1.43093
NG_047030.1	ABCF1	1.45361	1.54855	-0.798194	-0.7174	0.194144	-0.24756	-0.157355	-0.437666	0.107101	0.175331	1.52464	1.58976
NG_047035.1	RERE	0.459418	0.521379	-1.30758	-1.21171	0.439823	1.02485	1.04867	0.446027	1.07916	1.08511	-1.36526	-1.26399
NG_047036.1	ATP1A1	-0.361097	-0.279678	-1.2035	-1.13024	-1.10151	0.713718	0.76178	0.979293	1.5674	1.57596	0.861879	0.89433
NG_047037.1	ATP6V0A1	-1.60278	-2.46497	-0.687567	-1.15197	0.182826	0.601319	0.855541	0.136758	1.13307	1.59215	-0.0686135	-0.199872
NG_047038.1	MYRF	0.597051	0.639028	-0.700808	-0.670493	0.948384	-1.19105	-1.14702	0.353876	0.898328	0.896977	-1.31564	-1.2719
NG_047040.1	CAMK2A	-0.328789	-0.236431	-3.73945	-3.67484	0.184713	-0.223843	-0.160294	0.122631	0.828437	0.861142	0.238053	0.287351
NG_047042.1	CDC42	-0.161158	-0.0921571	0.401755	0.417114	-3.84349	0.517837	0.556692	-0.0736701	1.15783	1.16325	-0.0388286	-0.0171859
NG_047043.1	CLTC	0.180988	0.207184	0.364629	0.35583	-1.88798	0.770433	0.764974	0.662755	1.14583	1.11692	0.755875	0.743527
NG_047044.1	CNTFR	0.0737205	NA	-1.20495	NA	NA	-0.0029824	NA	0.732453	0.993148	NA	0.900549	NA
NG_047045.1	ATF2	-0.263373	-0.51127	-1.3993	-2.29104	0.529787	0.763131	1.03417	0.689725	0.260843	0.242505	-0.324566	-0.641197
NG_047047.1	DNAH9	NA	NA	NA	NA	NA	NA	NA	NA	NA	NA	NA	NA
NG_047048.2	EIF4E	NA	NA	NA	NA	NA	NA	NA	NA	NA	NA	NA	NA
NG_047049.1	FABP3	NA	NA	NA	NA	NA	NA	NA	NA	NA	NA	NA	NA
NG_047050.1	GABRB2	0.880364	0.921295	0.542589	0.561565	0.290767	0.100214	0.130559	-1.34	0.555913	0.568445	-1.88753	-1.86412
NG_047053.1	GOLGA4	-0.303493	-0.225691	-1.1138	-1.07051	-0.446143	-0.786679	-0.731484	-0.811591	1.44589	1.47984	-0.49568	-0.448845
NG_047058.1	MBNL1	-0.294606	-0.255151	-0.350839	-0.367451	1.37079	-0.47547	-0.454591	-1.14653	-0.408207	-0.430542	-0.676446	-0.656008
NG_047060.1	METTL1	-0.401261	-0.593545	1.16615	1.39603	-1.11283	0.605866	0.677182	1.3676	0.720409	0.811712	-0.160333	-0.318553
NG_047064.1	NELL1	1.31132	NA	-0.483334	NA	NA	1.19434	NA	0.796276	-1.27742	NA	0.591946	NA
NG_047069.1	PPP2R5C	NA	NA	NA	NA	NA	NA	NA	NA	NA	NA	NA	NA
NG_047072.1	PTPRF	-0.992691	-1.05719	-1.97746	-2.14913	-0.619261	1.0195	1.09962	-0.109376	1.23607	1.30963	1.4055	1.50255
NG_047074.1	RFX4	NA	-0.910565	NA	0.0969872	-0.047529	NA	0.535858	NA	NA	2.21959	NA	-0.516788
NG_047076.1	RYR3	NA	NA	NA	NA	NA	NA	NA	NA	NA	NA	NA	NA
NG_047078.1	GRIA1	0.396465	0.468791	0.433	0.449487	-1.73708	0.659445	0.699166	-1.73881	-0.966783	-0.974038	0.258383	0.279712
NG_047080.1	SLC8A3	0.727697	0.854752	0.637168	0.710738	-0.111308	-1.37704	-1.23747	-2.10135	-0.619912	-0.537139	0.512122	0.594908
NG_047081.1	SMARCC2	0.0564247	0.15158	0.16387	0.214233	0.601598	0.516001	0.564689	0.38508	1.0875	1.08711	0.484089	0.523994
NG_047082.1	STX3	-0.648178	NA	0.236626	NA	NA	0.13733	NA	-0.0309303	1.01441	NA	0.275623	NA
NG_047083.1	MTX1	-0.290962	NA	-1.48006	NA	NA	0.439224	NA	0.785855	0.780555	NA	0.380415	NA
NG_047084.1	THBS4	-0.139247	-0.215424	-0.529516	-0.751912	0.907908	-0.0811583	-0.167593	0.300011	-0.480921	-0.69782	1.50758	1.83688
NG_047087.1	ZFP37	NA	NA	NA	NA	NA	NA	NA	NA	NA	NA	NA	NA
NG_047088.1	ST7	-0.815509	-0.695052	-0.847273	-0.772048	-0.944587	-0.50589	-0.435591	-1.05388	0.0930115	0.0971216	0.241644	0.250064
NG_047091.1	KCNAB2	NA	NA	NA	NA	NA	NA	NA	NA	NA	NA	NA	NA
NG_047092.1	DGKZ	NA	NA	NA	NA	NA	NA	NA	NA	NA	NA	NA	NA
NG_047093.1	CADPS	NA	NA	NA	NA	NA	NA	NA	NA	NA	NA	NA	NA
NG_047095.1	URI1	1.2325	1.70072	-0.402862	-0.80867	1.3895	0.23693	0.167445	0.106406	1.44748	1.95516	0.0514032	-0.123036
NG_047101.1	USP8	NA	NA	NA	NA	NA	NA	NA	NA	NA	NA	NA	NA
NG_047105.1	SLIT2	NA	NA	NA	NA	NA	NA	NA	NA	NA	NA	NA	NA
NG_047107.1	NRXN2	0.233624	0.297633	-0.983504	-1.00009	-0.968816	0.847243	0.906966	0.121424	1.37048	1.41054	0.432164	0.459454
NG_047109.1	RASAL2	-1.58714	-1.58481	-2.62873	-2.70573	0.0719107	0.772196	0.822677	0.403424	0.483895	0.486045	1.27795	1.32148
NG_047110.1	STX8	1.9121	2.08891	0.233583	0.336064	0.850957	-1.02849	-0.921185	0.981345	1.65684	1.76733	-0.453663	-0.35358
NG_047111.1	NCOR1	-0.0367365	0.0847951	0.701371	0.780325	0.590475	-2.11957	-2.06302	0.401653	0.150664	0.212233	0.320817	0.400391
NG_047112.1	MTFR1	0.734935	0.724882	0.93943	0.865194	0.480281	0.950648	0.896834	0.0775713	-1.02101	-1.0853	0.317441	0.257698
NG_047113.1	ULK2	NA	NA	NA	NA	NA	NA	NA	NA	NA	NA	NA	NA
NG_047114.1	SCRN1	NA	NA	NA	NA	NA	NA	NA	NA	NA	NA	NA	NA
NG_047115.1	ABCC5	0.266432	0.330222	-0.0367879	-0.0367845	-0.576746	0.690497	0.729414	0.500681	1.45006	1.46111	-0.711813	-0.714991
NG_047120.1	DCTN2	-2.01941	-2.17371	0.0802665	0.0780793	0.422165	0.503337	0.555441	0.271269	0.81489	0.872739	0.432981	0.467992
NG_047121.1	CCT7	NA	NA	NA	NA	NA	NA	NA	NA	NA	NA	NA	NA
NG_047123.1	MAPRE2	0.589262	0.665739	-1.80865	-1.75411	0.821615	-0.43492	-0.373851	1.26531	1.76018	1.79597	-0.782814	-0.728411
NG_047127.1	DAAM1	NA	NA	NA	NA	NA	NA	NA	NA	NA	NA	NA	NA
NG_047128.1	PDZRN3	0.33319	0.432752	-0.0472093	-0.0070611	1.15524	-0.431511	-0.372133	-0.294479	1.82203	1.84147	1.01572	1.05705
NG_047132.1	PPRC1	NA	NA	NA	NA	NA	NA	NA	NA	NA	NA	NA	NA
NG_047133.1	RHOBTB2	NA	NA	NA	NA	NA	NA	NA	NA	NA	NA	NA	NA
NG_047134.1	ANKRD12	0.620263	0.756338	0.250634	0.323161	0.762364	0.493162	0.590669	0.179812	0.777921	0.845436	0.0677234	0.145101
NG_047136.1	CABIN1	NA	NA	NA	NA	NA	NA	NA	NA	NA	NA	NA	NA
NG_047137.1	SMUG1	-0.164913	-0.174784	1.20804	1.1677	0.486823	0.346878	0.313654	0.572272	-0.0767125	-0.151659	0.416566	0.367715
NG_047141.1	SPAG8	NA	NA	NA	NA	NA	NA	NA	NA	NA	NA	NA	NA
NG_047143.1	FBXL5	NA	NA	NA	NA	NA	NA	NA	NA	NA	NA	NA	NA
NG_047144.1	CNTN6	0.538535	0.652937	-1.39585	-1.67496	0.672332	-0.59845	-0.722345	1.48945	-0.506776	-0.640965	1.746	2.02308
NG_047145.1	PCLO	0.480175	0.465764	0.894834	0.846593	0.448372	-0.600711	-0.640765	-1.11445	0.52834	0.473665	-1.66804	-1.71155
NG_047151.1	ING4	1.07708	1.12857	0.921794	0.93552	-0.292555	-0.772716	-0.693622	-0.306319	1.70293	1.68608	-0.411386	-0.353612
NG_047152.1	UBR5	0.665306	0.736364	-1.89186	-1.87961	0.616026	0.879934	0.929463	-0.822808	1.43909	1.4771	-0.751818	-0.724137
NG_047156.1	CNTN5	0.58329	0.713367	1.06442	1.12688	0.165351	0.285731	0.375396	0.395174	2.37339	2.41897	-0.433134	-0.357535
NG_047160.1	ZSCAN2	0.183587	NA	-0.35888	NA	NA	0.382094	NA	0.262429	1.19567	NA	0.317475	NA
NG_047161.1	LARP1B	1.84976	1.9734	-1.9865	-1.88441	0.103917	1.54177	1.63125	1.72473	-0.243268	-0.17139	-0.812547	-0.716776
NG_047162.1	BMP2K	NA	NA	NA	NA	NA	NA	NA	NA	NA	NA	NA	NA
NG_047163.1	INTS8	NA	NA	NA	NA	NA	NA	NA	NA	NA	NA	NA	NA
NG_047164.1	FRMD4A	0.393611	0.544061	-1.19791	-1.27749	-0.851373	0.478812	0.583872	0.30159	1.70452	1.86585	0.627187	0.718795
NG_047166.1	EXOC2	NA	NA	NA	NA	NA	NA	NA	NA	NA	NA	NA	NA
NG_047167.1	KDM3A	NA	NA	NA	NA	NA	NA	NA	NA	NA	NA	NA	NA
NG_047168.1	THSD1	NA	NA	NA	NA	NA	NA	NA	NA	NA	NA	NA	NA
NG_047170.1	KCNQ5	0.0231476	0.130144	0.0623793	0.100143	0.154385	0.518326	0.589411	1.00507	2.13385	2.17825	0.0871608	0.133147
NG_047171.1	SNX14	NA	NA	NA	NA	NA	NA	NA	NA	NA	NA	NA	NA
NG_047173.1	HMGN1P2	-0.479891	-0.323369	-1.27602	-1.18133	-0.759011	1.56421	1.64684	-1.26677	0.435172	0.496359	1.32921	1.40069
NG_047174.1	RBAK	0.208988	NA	0.255438	NA	NA	0.758849	NA	0.558271	0.207575	NA	0.441008	NA
NG_047176.1	COX5BP3	-0.0910039	0.0106082	-1.16259	-1.12516	0.661727	0.389559	0.470549	-0.648854	2.38481	2.47488	-1.14933	-1.10641
NG_047178.1	ABCG4	NA	NA	NA	NA	NA	NA	NA	NA	NA	NA	NA	NA
NG_047179.1	CSRNP1	-0.923087	-1.37499	-0.217398	-0.432528	-1.30515	-0.351653	-0.60452	1.12177	1.37238	1.77636	1.20353	1.55357
NG_047182.1	SLC13A3	NA	NA	NA	NA	NA	NA	NA	NA	NA	NA	NA	NA
NG_047184.1	BRCC3	0.186426	0.249491	-0.562751	-0.661145	-0.494672	0.853243	0.969346	1.0624	2.31235	2.58798	0.0454711	0.0357434
NG_047195.1	TBL1XR1	0.192499	0.294762	0.211355	0.262245	-0.11594	0.240082	0.310108	0.118599	1.2516	1.29093	0.309517	0.366175
NG_047197.1	TRPM3	0.0783949	0.182351	0.790181	0.830245	1.29769	0.0823409	0.152887	0.246797	-1.5268	-1.45188	0.254204	0.310828
NG_047198.1	WDR26	-0.46594	-0.418251	-0.715264	-0.713105	-1.27309	1.92186	1.94625	-0.604537	0.212969	0.209397	1.88357	1.8971
NG_047201.1	NETO2	-0.36481	-0.352231	-0.461473	-0.524618	-0.377606	0.445635	0.479646	-1.72562	1.50181	1.56279	0.96756	1.01318
NG_047203.1	USP48	NA	NA	NA	NA	NA	NA	NA	NA	NA	NA	NA	NA
NG_047204.1	COL25A1	0.641245	0.753932	-0.426704	-0.703756	-0.716614	1.06549	1.29269	0.407852	-0.532102	-0.850951	1.13422	1.37307
NG_047205.1	RTN4IP1	-0.0142126	0.0876177	-1.61534	-1.54183	-0.210102	-0.432879	-0.357698	-0.49517	2.05731	2.09527	0.162428	0.227463
NG_050571.1	ZNF582	NA	NA	NA	NA	NA	NA	NA	NA	NA	NA	NA	NA
NG_050601.1	ZC3H14	-1.46508	-1.38792	-2.02673	-1.98619	-1.00805	0.505194	0.540331	0.853244	1.3294	1.33762	-1.19119	-1.15267
NG_050616.1	CACNA1E	NA	NA	NA	NA	NA	NA	NA	NA	NA	NA	NA	NA
NG_050622.1	RAPGEF1	0.159134	0.235191	-0.739381	-0.686837	1.51347	1.40518	1.46566	0.223257	2.08911	2.1076	1.51652	1.54986
NG_050628.1	NFKB1	-0.654424	-0.519931	1.01136	1.06177	-0.720149	-0.884706	-0.77364	0.720865	1.60347	1.63157	0.735548	0.797768
NG_050640.1	SEC14L1	0.823193	0.840973	-1.44324	-1.43585	0.261149	1.08773	1.08056	1.1055	1.73769	1.69656	1.10757	1.08534
NG_050642.1	FZD5	-0.0469075	-0.0142944	-1.23016	-1.31042	1.44831	-0.685358	-0.721348	0.442026	1.89527	1.9239	0.0486572	0.025907
NG_050644.1	B3GALT1	NA	NA	NA	NA	NA	NA	NA	NA	NA	NA	NA	NA
NG_050648.1	PLXNC1	0.0473962	0.0753539	0.379334	0.382054	-0.0573286	0.790882	0.843743	-1.89476	1.06675	1.10937	-1.87381	-2.02547
NG_050650.1	SPRY2	-0.145349	-0.131295	0.377527	0.40422	0.457238	0.363754	0.400418	1.68747	-0.348143	-0.405424	0.452834	0.49223
NG_050652.1	NET1	0.451581	0.518518	-2.42007	-2.40293	0.40757	0.666937	0.713633	0.705162	0.53032	0.562737	0.940215	0.985529
NG_050658.1	WARS2	-0.168133	NA	-0.121399	NA	NA	-0.441258	NA	-0.767277	1.74255	NA	-0.971213	NA
NG_050660.1	ARPP21	0.105531	0.235704	-2.65934	-2.58556	0.2404	-0.0457974	0.0431553	0.204085	1.33992	1.38622	0.539826	0.609525
NG_050663.1	SPEN	-1.21253	-1.14169	0.366447	0.407597	0.420054	-1.40851	-1.35472	-1.92863	0.868901	0.905619	0.733506	0.778675
NG_050664.1	SIRT1	NA	NA	NA	NA	NA	NA	NA	NA	NA	NA	NA	NA
NG_050665.1	LIPT1	-0.345478	NA	-1.23416	NA	NA	0.392	NA	-0.118256	0.469854	NA	0.815873	NA
NG_050675.1	PCDHA9	-0.98274	NA	0.811862	NA	NA	-0.806523	NA	-2.25341	-0.663254	NA	0.538213	NA
NG_050678.1	ZMAT3	NA	NA	NA	NA	NA	NA	NA	NA	NA	NA	NA	NA
NG_050682.1	INTS3	-0.635922	-0.824846	-1.35405	-1.7508	-0.567497	0.995312	1.16847	0.890688	1.1794	1.38634	0.972905	1.13916
NG_050685.1	CTTNBP2	0.434705	0.443032	0.72648	0.687679	-0.852923	0.786831	0.763472	-0.676493	1.4129	1.35194	0.73659	0.702219
NG_050686.1	CHD6	NA	NA	NA	NA	NA	NA	NA	NA	NA	NA	NA	NA
NG_050735.1	SAFB2	0.222884	0.327727	-0.25206	-0.205482	0.437235	0.557502	0.627199	-1.30984	1.13758	1.1876	0.140465	0.197545
NG_050737.1	SP4	-0.375462	NA	-1.79494	NA	NA	-0.342913	NA	0.97277	-0.428293	NA	-1.42351	NA
NG_050740.1	STX7	0.596891	0.673678	1.18145	1.20403	0.828337	0.711669	0.760192	-1.43573	-2.11259	-2.00093	0.94881	0.982774
NG_050746.1	PCDHGC5	NA	NA	NA	NA	NA	NA	NA	NA	NA	NA	NA	NA
NG_050751.1	SOX11	-0.191936	-0.175515	0.413086	0.358985	-1.40122	0.396883	0.35698	0.672368	0.879065	0.805723	-1.12952	-1.15483
NG_050761.1	PCDHB4	0.0825717	0.0893399	-0.139755	-0.237246	-1.12565	1.01684	1.13953	-0.821054	0.275303	0.230932	0.766637	0.820091
NG_050764.1	NANOS1	-1.20395	-1.14223	-1.01774	-0.987717	-1.18776	1.20686	1.23719	-0.309462	2.0133	2.02182	-1.40014	-1.36433
NG_050860.1	ARHGEF10L	NA	NA	NA	NA	NA	NA	NA	NA	NA	NA	NA	NA
NG_050912.1	PCNX2	0.0959096	0.168301	-1.31932	-1.31768	1.1831	1.04528	1.13106	-0.33847	1.38305	1.46786	0.932433	1.01203
NG_050926.1	MACF1	NA	NA	NA	NA	NA	NA	NA	NA	NA	NA	NA	NA
NG_050927.1	COPA	NA	NA	NA	NA	NA	NA	NA	NA	NA	NA	NA	NA
NG_050928.1	GPR39	NA	NA	NA	NA	NA	NA	NA	NA	NA	NA	NA	NA
NG_050930.1	SLC9A2	NA	NA	NA	NA	NA	NA	NA	NA	NA	NA	NA	NA
NG_050931.1	TNR	-0.874878	-0.686803	0.661232	0.78357	-0.330452	-0.0069048	0.144769	0.285634	2.20537	2.31736	0.559478	0.690629
NG_050949.1	PIK3R3	NA	NA	NA	NA	NA	NA	NA	NA	NA	NA	NA	NA
NG_050957.1	DNAH6	-1.39766	NA	0.242743	NA	NA	1.01355	NA	1.74548	0.398877	NA	-0.244138	NA
NG_050964.1	XPR1	-0.522687	-0.413244	0.311775	0.360104	-0.137167	0.505277	0.585084	0.458952	-2.78687	-2.81308	0.224314	0.279753
NG_050965.1	ARHGAP29	-1.4108	-1.24173	0.0497638	0.131073	2.03803	0.213727	0.32241	0.490661	1.22858	1.28666	-0.751873	-0.655451
NG_050966.1	SV2A	-1.6417	-1.60264	0.35599	0.381627	-1.74714	0.786948	0.823296	0.449142	0.828337	0.851969	0.519397	0.548583
NG_050967.1	EXOC6B	-0.0930412	NA	0.989739	NA	NA	1.15469	NA	-1.43695	-0.911643	NA	0.875922	NA
NG_050988.1	GATAD2B	-0.838701	-0.592456	-1.46004	-1.27626	0.150393	0.587396	0.712662	0.3816	1.41259	1.43733	-0.579156	-0.427343
NG_051001.1	OLA1	-0.408607	-0.313703	-1.07716	-1.00268	1.07654	1.04977	1.09655	1.16641	-0.748161	-0.686125	1.11256	1.14885
NG_051007.1	C2CD6	-0.163388	-0.0420311	0.996515	1.0377	-0.244343	0.434097	0.5095	-1.71681	-0.945843	-0.849003	-2.12531	-1.97766
NG_051022.1	SPEG	NA	NA	NA	NA	NA	NA	NA	NA	NA	NA	NA	NA
NG_051023.1	LRP1B	0.506616	0.713266	0.211446	0.324597	-0.442508	0.203771	0.352331	-0.120322	1.02329	1.11663	-0.961436	-0.833736
NG_051033.1	ADD3	NA	NA	NA	NA	NA	NA	NA	NA	NA	NA	NA	NA
NG_051040.1	GALNT14	NA	NA	NA	NA	NA	NA	NA	NA	NA	NA	NA	NA
NG_051044.1	BABAM2	NA	NA	NA	NA	NA	NA	NA	NA	NA	NA	NA	NA
NG_051045.1	DNAJC13	0.541185	0.625296	-1.1609	-1.10887	-1.46532	1.14294	1.20052	0.855827	1.52244	1.55388	-0.573089	-0.519407
NG_051047.1	ULK4	NA	NA	NA	NA	NA	NA	NA	NA	NA	NA	NA	NA
NG_051059.1	NEDD8	NA	NA	NA	NA	NA	NA	NA	NA	NA	NA	NA	NA
NG_051070.1	PCNX1	-0.924955	-0.743767	0.470154	0.54431	-0.747549	-0.804556	-0.660039	0.593795	1.12829	1.16776	1.2077	1.25942
NG_051072.1	NEDD4	-0.074646	-0.292988	-1.03212	-1.91587	0.218911	0.0608915	-0.108446	1.90999	0.710411	0.918643	-0.241531	-0.617615
NG_051073.1	SOS2	NA	NA	NA	NA	NA	NA	NA	NA	NA	NA	NA	NA
NG_051075.1	NEMF	0.894557	0.948411	-1.34651	-1.3014	1.14025	-0.393731	-0.34628	0.970768	1.25388	1.27325	-0.932567	-0.887625
NG_051091.1	ATG2B	NA	NA	NA	NA	NA	NA	NA	NA	NA	NA	NA	NA
NG_051107.1	VMP1	NA	NA	NA	NA	NA	NA	NA	NA	NA	NA	NA	NA
NG_051183.1	PDE1C	-1.10763	-1.24586	-1.80641	-2.11851	-0.561143	0.824833	0.907301	-0.0975272	1.28961	1.39244	0.555729	0.580287
NG_051184.1	NUP205	-0.482673	-0.73635	-0.0489673	-0.179572	-0.714451	-0.351585	-0.581145	0.913015	1.59673	2.06238	1.00739	1.26869
NG_051188.1	PGPEP1	NA	NA	NA	NA	NA	NA	NA	NA	NA	NA	NA	NA
NG_051199.1	SND1	-0.278403	-0.155639	-0.277941	-0.243103	0.321769	0.2552	0.364118	0.234441	2.35958	2.56618	0.127157	0.201221
NG_051202.1	PRR12	0.0198734	0.0437729	0.51327	0.511171	-0.194324	-0.506571	-0.506633	1.57178	0.478863	0.471596	1.44125	1.44471
NG_051203.1	TSHZ3	0.5872	0.659036	-0.370341	-0.334796	-0.221884	-1.26985	-1.18621	0.464115	0.035061	0.0521568	0.575411	0.600081
NG_051212.1	ZNF420	NA	NA	NA	NA	NA	NA	NA	NA	NA	NA	NA	NA
NG_051221.1	ZNF224	NA	NA	NA	NA	NA	NA	NA	NA	NA	NA	NA	NA
NG_051223.1	SEZ6	0.591359	0.612537	-1.8441	-1.80114	-1.19143	1.43909	1.42181	-0.766574	0.456821	0.440105	1.10753	1.08557
NG_051224.1	HIPK4	0.737725	0.773625	-1.99396	-1.94155	0.474859	0.759192	0.77608	0.415389	0.632084	0.636306	1.16466	1.16914
NG_051230.1	SCG5	0.776357	0.83304	-1.58958	-1.62636	-0.935778	1.05355	1.09891	-0.945049	-0.684737	-0.702719	0.770367	0.800372
NG_051236.1	CSNK1G1	-0.25566	NA	-1.18177	NA	NA	0.492194	NA	0.214083	1.0322	NA	0.287422	NA
NG_051240.1	KLHL9	-3.73174	-3.74956	-0.143354	-0.17679	-0.427578	0.0567302	0.048335	0.276873	0.986751	0.953925	0.450186	0.430565
NG_051241.1	ARRDC3	0.522184	0.584016	-1.07423	-1.23649	0.828255	1.50812	1.64828	0.820292	-0.366583	-0.459886	-1.44015	-1.63711
NG_051244.1	TTBK1	NA	NA	NA	NA	NA	NA	NA	NA	NA	NA	NA	NA
NG_051252.1	NTN4	NA	NA	NA	NA	NA	NA	NA	NA	NA	NA	NA	NA
NG_051267.1	GET3	-0.425508	-0.298241	0.291129	0.351083	-0.109247	0.221827	0.303505	0.00060032	0.348415	0.397115	-0.101609	-0.0348873
NG_051287.1		NA	NA	NA	NA	NA	NA	NA	NA	NA	NA	NA	NA
NG_051289.1	DPCD	0.171522	0.238633	0.731992	0.765938	-1.35415	0.534758	0.582226	0.519879	0.762724	0.789637	0.540242	0.575918
NG_051291.1	ELMOD3	NA	NA	NA	NA	NA	NA	NA	NA	NA	NA	NA	NA
NG_051298.1	SDK1	NA	NA	NA	NA	NA	NA	NA	NA	NA	NA	NA	NA
NG_051308.1	RHOA	0.59368	0.659226	-1.53544	-1.6177	0.971987	0.843512	0.90576	0.881936	-1.1268	-1.19303	0.827375	0.87164
NG_051313.1	MYT1L	NA	NA	NA	NA	NA	NA	NA	NA	NA	NA	NA	NA
NG_051314.1	BAZ2B	1.23514	1.32436	0.853013	0.904679	-0.447707	-0.476353	-0.367891	1.30544	-0.392583	-0.313655	1.11174	1.16153
NG_051329.1	SEMA3D	-0.615676	NA	0.706782	NA	NA	-1.52006	NA	-0.0355767	-0.121343	NA	-1.76758	NA
NG_051331.1	CALM3	1.50506	1.58815	-0.759573	-0.90633	2.00249	-0.0168458	-0.0899527	-0.0795732	-0.03705	-0.126071	1.73913	1.81304
NG_051333.1	LIPT2	0.367637	0.43594	-1.80044	-1.79912	0.444842	-1.26977	-1.24963	1.12562	1.19245	1.21469	-0.972465	-0.957844
NG_051334.1	SLC25A46	NA	NA	NA	NA	NA	NA	NA	NA	NA	NA	NA	NA
NG_051335.2	KIAA0586	NA	NA	NA	NA	NA	NA	NA	NA	NA	NA	NA	NA
NG_051360.1	MTSS2	NA	NA	NA	NA	NA	NA	NA	NA	NA	NA	NA	NA
NG_051361.1	SNAI1P1	0.0818351	0.172243	-2.5248	-2.46445	-1.4133	0.40934	0.470743	0.348926	1.28391	1.30991	0.829096	0.871548
NG_051363.1	TTN-AS1	0.926535	1.39634	-0.598821	-1.38981	-0.261695	0.260659	0.164363	0.368184	-0.642997	-1.48114	-0.21449	-0.69871
NG_051489.1	ZNF772	0.179188	0.19212	0.158612	0.0999401	-2.44238	0.194958	0.168251	0.32835	2.14931	2.3788	-0.0176833	-0.0952012
NG_051554.1	RUFY3	NA	NA	NA	NA	NA	NA	NA	NA	NA	NA	NA	NA
NG_051558.1	SV2B	-1.11478	-1.01902	0.925153	0.984755	-0.433443	0.796117	0.872043	0.732639	1.23033	1.28308	-0.103915	-0.0367187
NG_051561.2	LCOR	-0.140845	-0.702653	0.264479	0.233377	-0.847963	-0.033688	-0.482787	0.286194	0.856124	1.69467	0.209242	0.104546
NG_051566.1	ABLIM3	0.164964	0.219796	-2.94719	-2.93334	-1.30737	0.667912	0.70586	0.561345	0.751262	0.766647	0.525862	0.550751
NG_051568.1	PPIP5K2	0.141364	0.0938367	0.20531	0.15403	-1.77328	-0.760486	-1.36335	0.288861	1.04506	1.47924	0.486365	0.604889
NG_051569.1	GUF1	-0.337123	-0.268846	1.00809	1.04217	0.287705	0.437757	0.489256	0.371595	1.64859	1.67961	0.496408	0.531439
NG_051570.1	SPATA5	0.256545	0.379201	-1.92226	-1.84161	-1.04181	1.38389	1.46937	0.859658	0.344231	0.401384	-0.462724	-0.38455
NG_051574.1	DROSHA	0.688402	0.731263	-1.06264	-1.0337	-1.06628	-1.18543	-1.15301	1.12352	1.35111	1.34386	1.23016	1.2347
NG_051577.1	CNNM1	NA	NA	NA	NA	NA	NA	NA	NA	NA	NA	NA	NA
NG_051580.1	THADA	0.647274	0.749249	-0.848698	-0.785431	-0.5891	2.39234	2.46282	0.777956	-0.991474	-0.935716	-1.02982	-0.961469
NG_051586.1	CLDN22	-0.376161	-0.298144	-1.01897	-0.98106	-0.810623	1.37219	1.40144	-0.108213	-1.64506	-1.60894	1.02504	1.04592
NG_051589.1	SSBP2	NA	NA	NA	NA	NA	NA	NA	NA	NA	NA	NA	NA
NG_051591.1	ZFR	-0.580573	-0.52551	1.70694	1.67747	-0.369538	1.49058	1.4761	-0.492669	-0.120765	-0.119852	1.24852	1.23267
NG_051594.1	YTHDC2	NA	NA	NA	NA	NA	NA	NA	NA	NA	NA	NA	NA
NG_051595.1	TRIM8	0.498169	0.541392	-1.49394	-1.51517	-0.461318	-0.722633	-0.72088	0.869092	-0.856562	-0.881966	0.854263	0.856249
NG_051602.1	CDC14A	-0.755504	NA	1.18201	NA	NA	-0.239178	NA	-1.43089	1.05155	NA	-1.44331	NA
NG_051606.1	RIPOR2	0.549481	0.643245	-1.03756	-0.965633	0.768858	-0.198546	-0.120582	0.918996	1.4505	1.50321	0.956562	1.0208
NG_051609.1	UFSP2	NA	NA	NA	NA	NA	NA	NA	NA	NA	NA	NA	NA
NG_051619.2	CD24P3	-0.104086	0.0234389	0.94935	0.994631	0.169532	0.338099	0.423498	-0.0891057	0.821117	0.85951	0.102482	0.175664
NG_051626.1	SLC35G1	NA	NA	NA	NA	NA	NA	NA	NA	NA	NA	NA	NA
NG_051627.1	ARHGAP24	1.00705	1.00149	0.359556	0.333221	0.924388	0.767703	0.746531	-0.09529	-0.435412	-0.453859	-0.219585	-0.232276
NG_051648.1	C12orf4	-0.491056	-0.482283	-1.16256	-1.22579	-1.11841	0.654994	0.695723	1.5969	1.4467	1.49936	1.72553	1.80441
NG_051651.1	LYRM4	0.490106	0.641782	-1.05887	-1.6007	0.908931	-0.285386	-0.486637	0.78581	0.945671	1.24084	0.713727	0.9233
NG_051652.1	ZNF287	-1.46242	NA	-1.47563	NA	NA	0.977034	NA	-0.673299	1.21736	NA	0.0383501	NA
NG_051656.1	DSCAML1	0.481123	0.598474	-0.663218	-0.584915	-0.466604	1.09928	1.18362	-1.17179	1.14411	1.20288	1.3421	1.41354
NG_051657.1	ARHGAP20	0.519491	0.553901	1.32901	1.3039	-0.893669	-0.546977	-0.51127	1.74638	-0.434267	-0.425646	-0.459749	-0.438034
NG_051658.1	XPO5	-1.36952	-1.31578	-1.86357	-1.84614	0.264486	0.57217	0.613145	-0.715837	-0.955024	-0.940994	0.539145	0.569508
NG_051659.1	SRGAP1	0.098628	0.101981	-0.052331	-0.229972	0.716306	0.559034	0.890746	-0.0803882	0.600878	0.927489	0.182802	0.198326
NG_051660.1	LRFN5	0.574077	0.693325	0.664928	0.725087	0.719113	1.87697	1.91657	-0.70766	-0.769693	-0.669662	1.08774	1.13961
NG_051662.1	UNC79	NA	NA	NA	NA	NA	NA	NA	NA	NA	NA	NA	NA
NG_051663.1	WDR48	0.0575167	0.106624	1.04914	1.05322	0.843554	-1.2218	-1.18223	-0.920971	-0.107362	-0.0967417	1.07595	1.08371
NG_051664.1	RELCH	1.77209	1.8443	-0.99102	-1.17658	-0.0164606	0.0931997	0.00083327	0.580154	1.06386	1.01883	2.31039	2.3712
NG_051667.1	RALGAPA1	-1.25727	-1.16703	-0.797497	-0.768343	-1.27713	-1.49347	-1.42938	1.08309	-0.0059322	-0.0089294	1.14135	1.12099
NG_051668.1	USP28	-0.274115	-0.230246	-1.12144	-1.1526	-0.816331	-0.791693	-0.795954	0.830004	1.3238	1.39137	0.990698	1.0555
NG_051671.1	CTR9	1.01766	1.09234	0.159867	0.171522	1.1883	0.523768	0.560954	-0.773011	1.70878	1.75818	-0.390418	-0.390462
NG_051763.1	NME7	NA	NA	NA	NA	NA	NA	NA	NA	NA	NA	NA	NA
NG_051764.1	MDGA1	NA	NA	NA	NA	NA	NA	NA	NA	NA	NA	NA	NA
NG_051765.1	DOCK5	NA	NA	NA	NA	NA	NA	NA	NA	NA	NA	NA	NA
NG_051800.1	DOCK2	0.275935	NA	0.390301	NA	NA	0.593003	NA	0.669387	0.105011	NA	-0.0064038	NA
NG_051801.1	MICAL2	NA	NA	NA	NA	NA	NA	NA	NA	NA	NA	NA	NA
NG_051803.1	TENM4	0.0538913	0.188157	0.124222	0.202924	-0.532023	-0.195662	-0.0933433	1.59649	-0.483904	-0.41024	1.97175	2.04086
NG_051805.1	PCF11	-0.190677	0.0104042	0.616646	0.716114	-0.498108	0.456857	0.598266	-1.67534	1.7932	1.87333	0.525607	0.636931
NG_051806.1	MRRF	-1.00856	-1.00393	-0.532613	-0.561216	-0.881725	-1.01368	-1.03405	-0.669916	2.09206	2.08745	-0.678058	-0.703777
NG_051811.1	ATG13	NA	NA	NA	NA	NA	NA	NA	NA	NA	NA	NA	NA
NG_051812.1	PGAP2	NA	NA	NA	NA	NA	NA	NA	NA	NA	NA	NA	NA
NG_051813.1	BHLHE22	-0.8007	-0.758343	-0.233472	-0.231095	-0.957743	-0.589379	-0.579636	0.277701	0.744953	0.772526	1.5198	1.59687
NG_051816.1	COBL	0.0197936	0.109215	-0.737695	-0.679092	1.76757	-0.423429	-0.355052	0.383886	0.376404	0.416099	0.933479	0.978755
NG_051818.1	LGR4	-0.163679	-0.0992622	-1.69079	-1.66857	1.13256	-0.424061	-0.388755	-0.883947	2.4347	2.44941	0.0981132	0.125599
NG_051820.1	UBN1	0.582911	0.644493	0.723151	0.755926	0.673224	0.759407	0.80112	-1.17648	1.5196	1.54668	0.699728	0.736105
NG_051822.1	AHNAK	NA	NA	NA	NA	NA	NA	NA	NA	NA	NA	NA	NA
NG_051825.1	CEP83	NA	NA	NA	NA	NA	NA	NA	NA	NA	NA	NA	NA
NG_051831.1	GABRB1	0.108677	0.276935	-2.34812	-2.25536	-0.395702	1.33791	1.47123	1.22122	-1.342	-1.25814	0.974772	1.08672
NG_051834.1	RCC2	1.3367	1.37683	1.50445	1.52419	1.47697	-0.679	-0.739271	-0.40612	0.435818	0.404163	1.02349	1.02659
NG_051835.1	TAOK3	0.850882	0.935595	-3.29253	-3.23631	-0.0745092	0.893882	0.9496	0.767786	-0.21376	-0.177089	0.614534	0.661978
NG_051927.1	SASH1	0.438382	0.520521	-2.17787	-2.06018	-1.0431	-0.154491	-0.0762144	0.0178081	0.621488	0.657775	-1.22886	-1.13201
NG_051931.1	FILIP1	-1.92382	-1.6609	0.468998	0.588646	-0.661408	-0.95486	-0.764711	-0.439654	-0.568641	-0.427376	-0.683339	-0.517709
NG_051932.1	PHIP	0.314082	0.593612	-0.548671	-0.434851	-0.838189	0.0572371	0.250586	0.029908	1.48427	1.70251	-0.0377449	0.120366
NG_051933.1	CADM3	0.130779	NA	0.355802	NA	NA	-0.822304	NA	-2.30265	0.509035	NA	0.573183	NA
NG_051941.1	TDRD6	-0.938384	-0.798587	-2.30874	-2.21647	-0.517134	0.984871	1.07849	1.64332	-0.0972879	-0.029735	0.262952	0.345309
NG_051942.1	L3MBTL3	0.018677	0.0298447	0.0444337	-0.0246166	-1.57335	-0.0174388	-0.061605	0.028476	1.43653	1.38032	-1.18207	-1.26645
NG_051943.1	FAXC	-0.509969	-0.328933	0.369257	0.459254	-3.08436	-0.290732	-0.166907	-0.100195	2.01827	2.09549	-0.0333826	0.0663586
NG_051945.1	SLC6A17	0.0145497	0.04281	-1.79077	-1.76047	-1.27344	1.01738	1.00595	0.41924	1.01823	0.984722	0.909237	0.888361
NG_051949.1	FIGNL1	-0.208568	-0.441549	0.455362	0.505856	1.09585	0.5098	0.610277	0.462465	1.02438	1.34519	0.142673	0.0453412
NG_051950.1	ZKSCAN1	0.0499885	NA	-0.727612	NA	NA	0.223427	NA	0.400551	0.843685	NA	0.0880418	NA
NG_051951.1	RINT1	NA	NA	NA	NA	NA	NA	NA	NA	NA	NA	NA	NA
NG_051954.1	VKORC1L1	NA	NA	NA	NA	NA	NA	NA	NA	NA	NA	NA	NA
NG_051955.1	CCDC71L	-0.195365	NA	0.428	NA	NA	0.596659	NA	0.0270914	0.718061	NA	0.0545854	NA
NG_051966.1	FGF12	-0.0582143	0.0475481	0.773022	0.823843	0.11682	0.380858	0.454321	0.960068	1.00506	1.04673	0.830624	0.889007
NG_051977.1	RAB11FIP4	NA	NA	NA	NA	NA	NA	NA	NA	NA	NA	NA	NA
NG_051989.1	TIAF1	NA	NA	NA	NA	NA	NA	NA	NA	NA	NA	NA	NA
NG_052003.1	KCTD17	0.0967416	0.12149	-0.896666	-0.917278	-1.31728	0.492263	0.498687	0.353051	0.465516	0.450058	0.233012	0.225891
NG_052594.1	PI4K2B	-1.30989	-1.27033	-0.748514	-0.749227	0.608999	0.0844029	0.153872	-0.285936	1.13863	1.21697	0.522868	0.593496
NG_052595.1	TNFRSF12A	0.431612	0.489904	-1.3174	-1.32656	0.971304	0.631168	0.674995	0.31254	0.878868	0.9181	0.518525	0.557797
NG_052602.1	PARD3	0.235034	0.387362	-0.17153	-0.0759442	0.328829	2.35788	2.47494	-0.547782	0.357419	0.442673	-0.559472	-0.457389
NG_052613.1	CCDC15	-0.173803	-0.0388704	-2.19694	-2.06476	-0.177778	2.21768	2.27378	0.31446	-0.505879	-0.420459	-0.342165	-0.245786
NG_052614.1	ZNF184	-1.721	NA	2.39038	NA	NA	0.0610058	NA	0.0034604	0.549869	NA	0.234963	NA
NG_052621.1	BTBD11	-1.06873	NA	-1.10238	NA	NA	-0.594248	NA	0.543853	-1.95501	NA	0.460083	NA
NG_052622.1	USP44	-0.121241	-0.0703993	-1.26165	-1.25433	0.040912	-0.103836	-0.0832129	-0.0789841	-0.246122	-0.251279	-0.187621	-0.178598
NG_052634.1	CCDC171	0.433527	0.597423	0.0542257	0.144612	-0.754988	1.12823	1.27356	-1.21422	-0.448156	-0.379607	-1.22656	-1.15624
NG_052636.1	OGDHL	NA	NA	NA	NA	NA	NA	NA	NA	NA	NA	NA	NA
[truncated: 1,580 more rows]
