# Supplementary figures and images for: Tempo and mode of gene expression evolution in the brain across primates
Source: eLife journal article supplement (doi:10.7554/elife.70276), 2024-01-26

# Correlation Differences Between Different Species

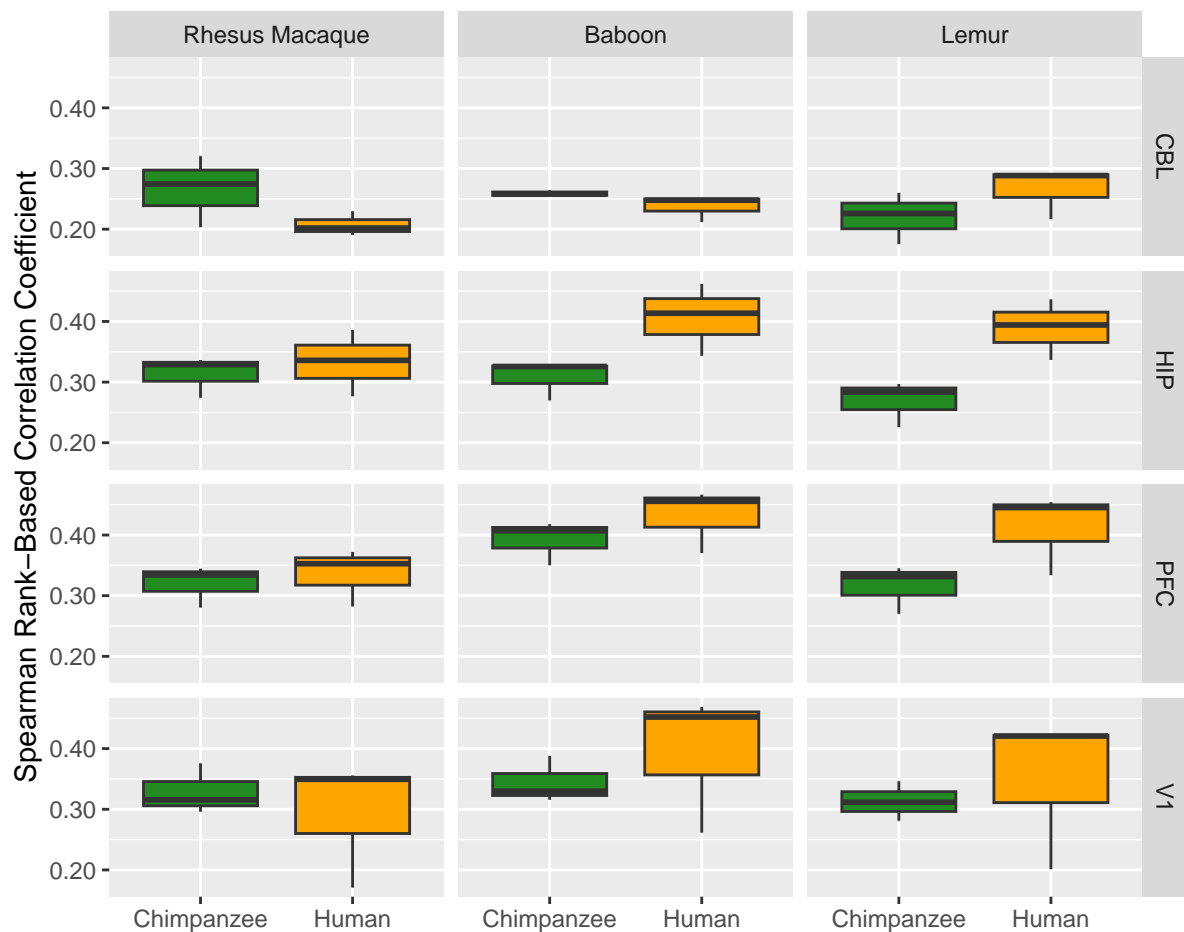

Supplement: supp [file elife-70276-supp-v1.zip]

# Node reproducibility

$0.8 \leq \bullet$   
 $0.4 \leq \bullet < 0.8$   
 $0.05 \leq \bullet < 0.4$

## Regions

- CBL
- HIP
- PFC
- V1

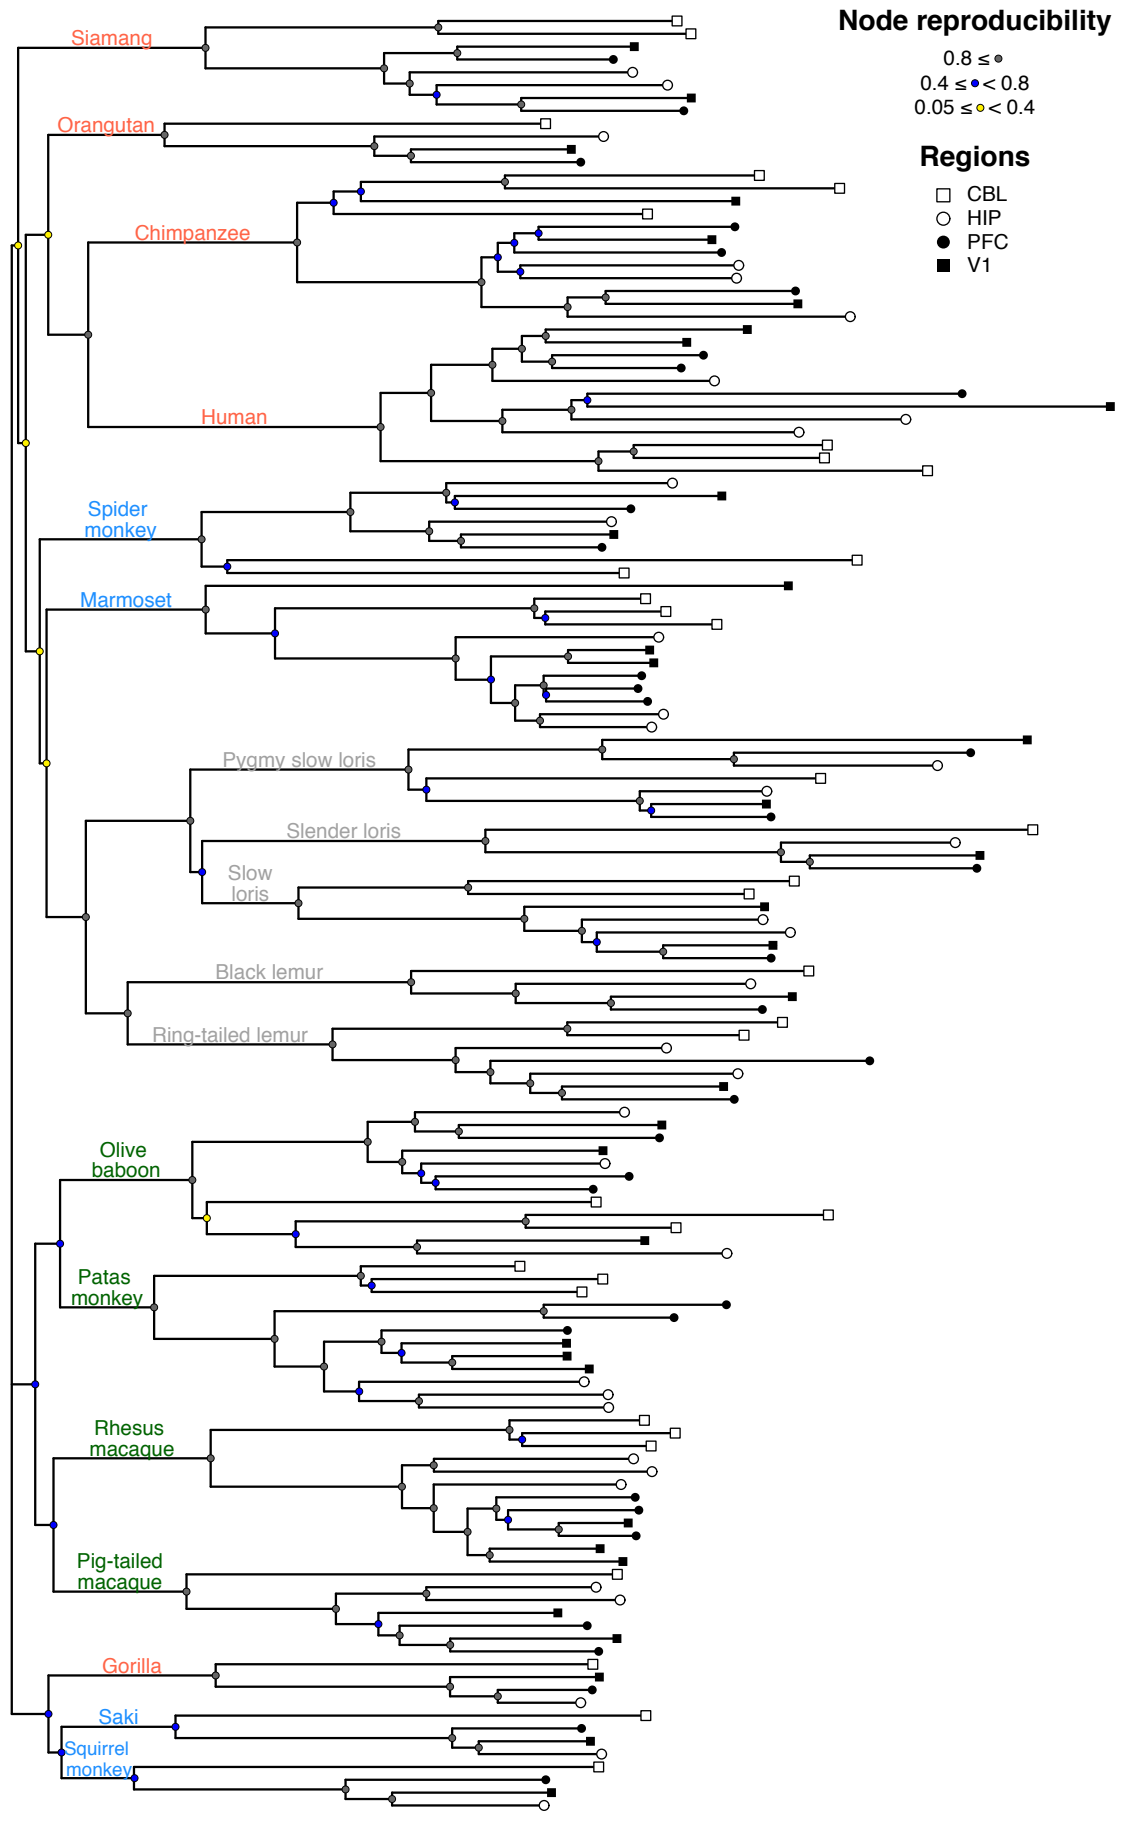

Supplement: supp [file elife-70276-supp-v1.zip]

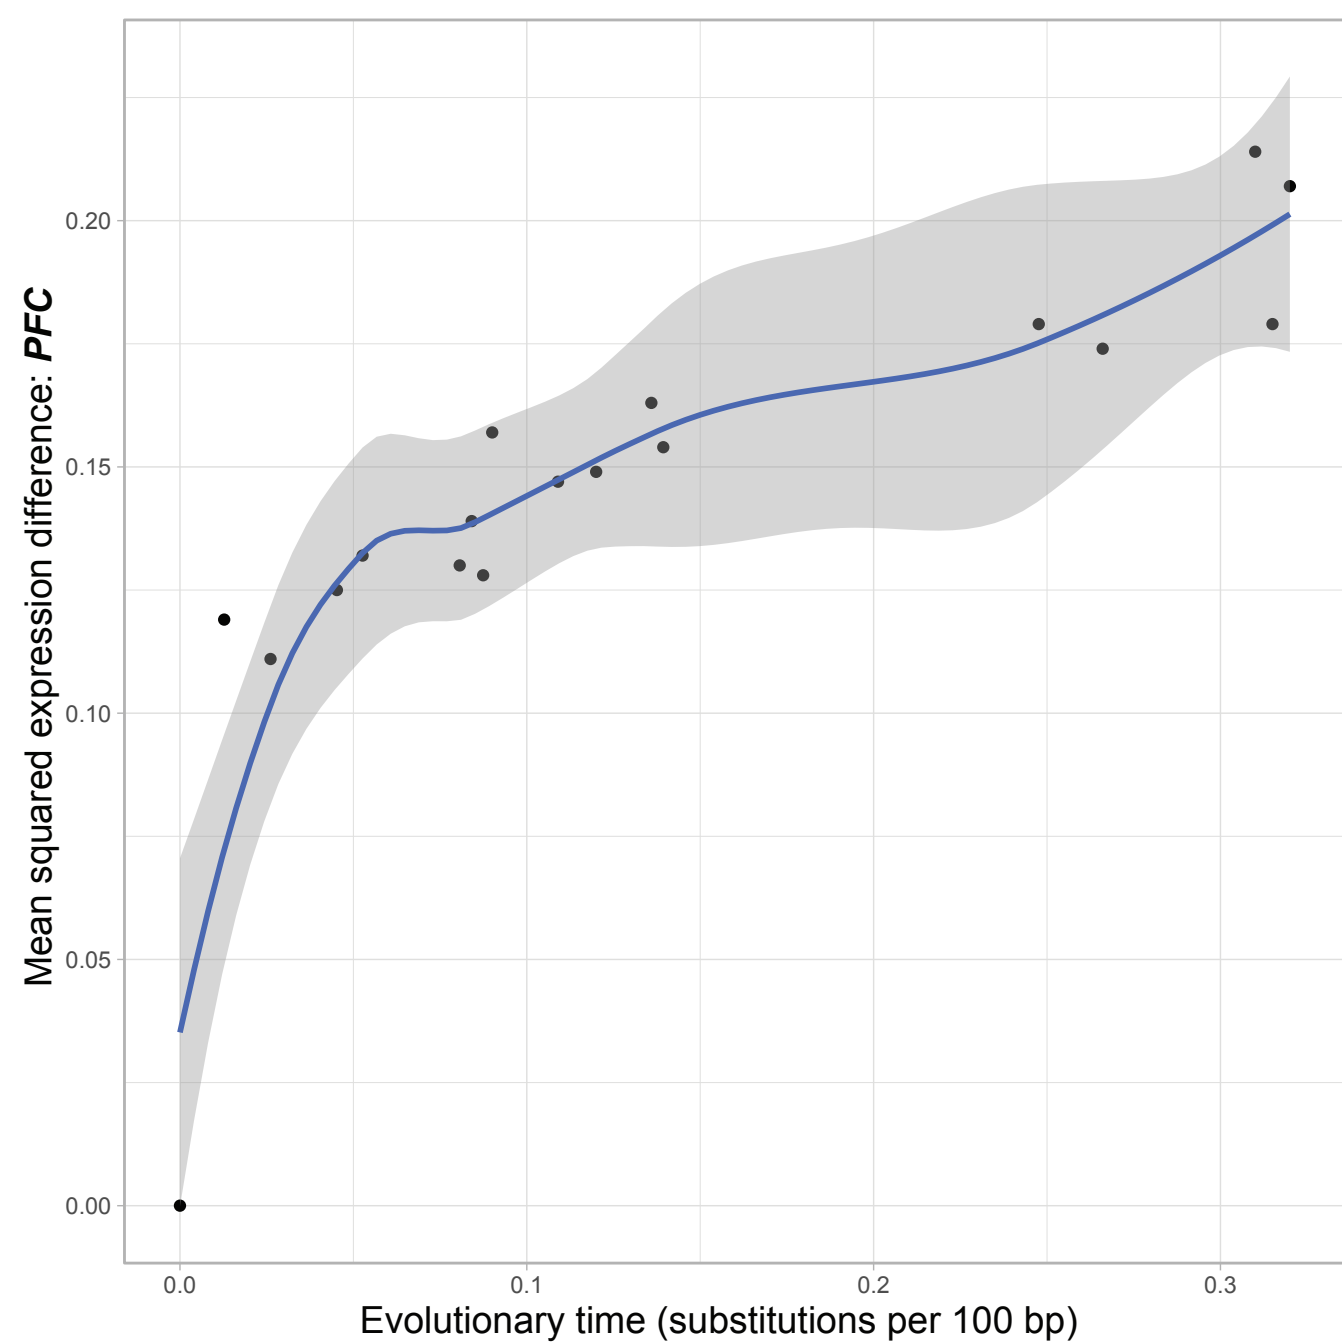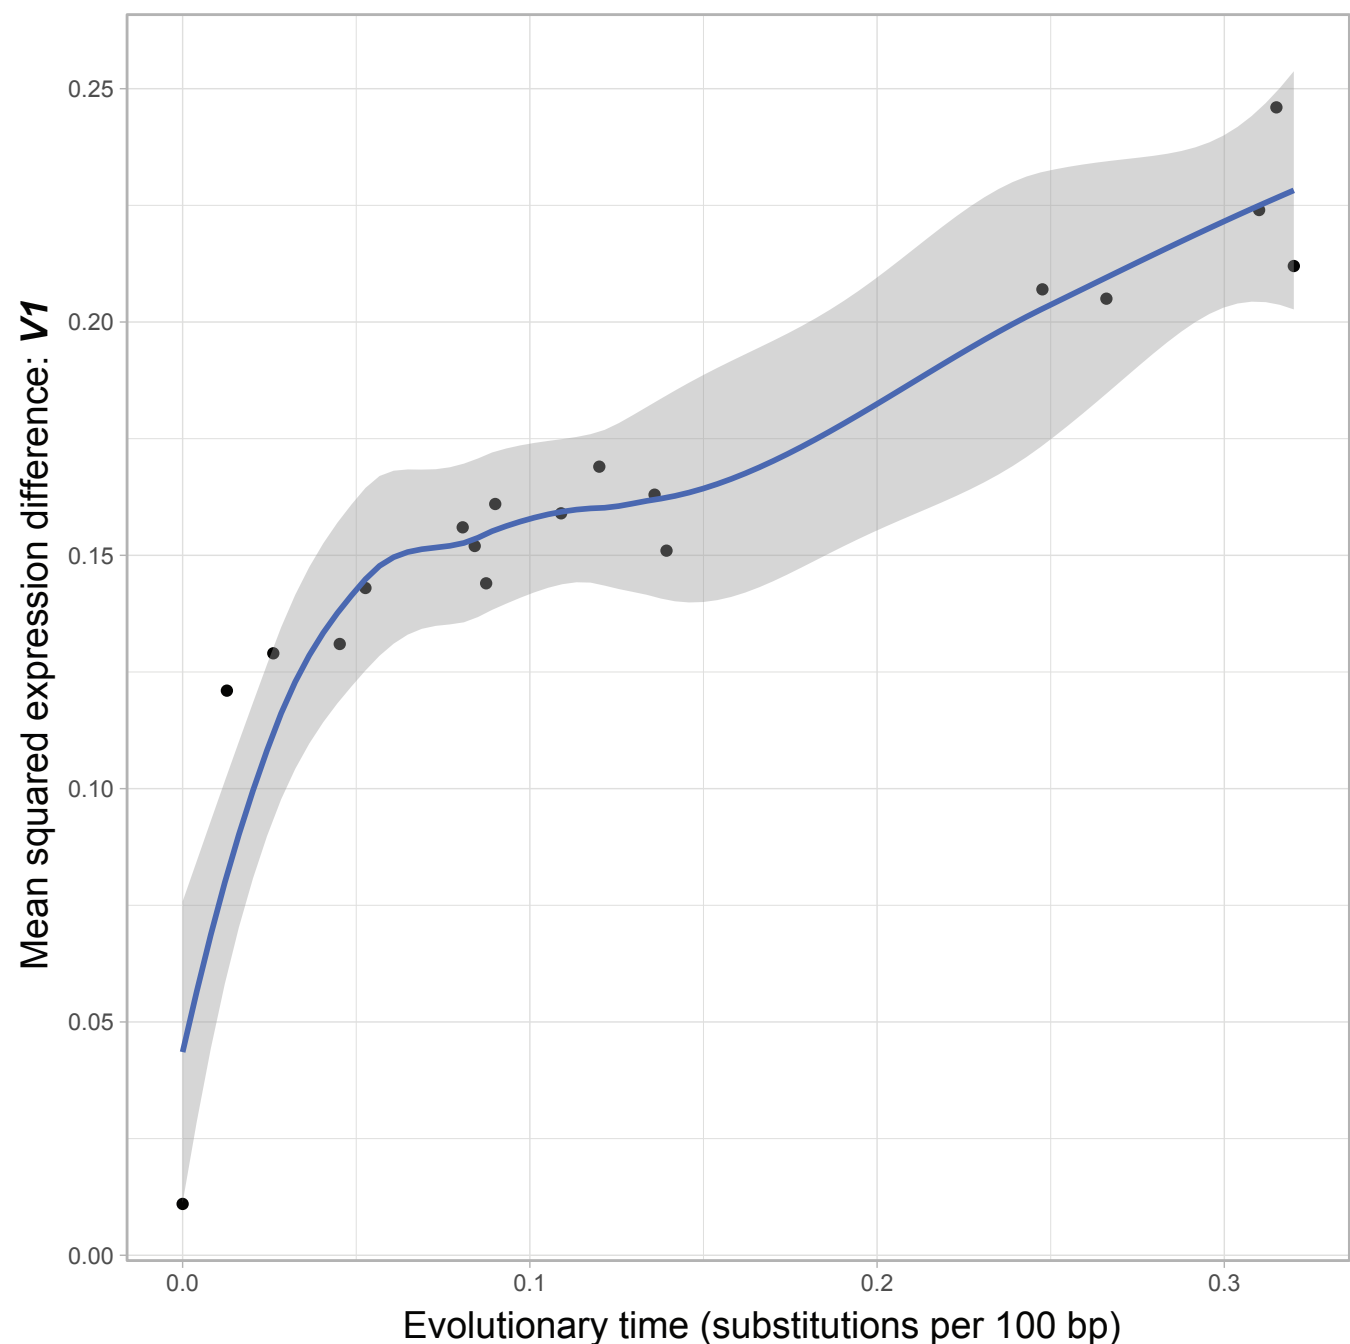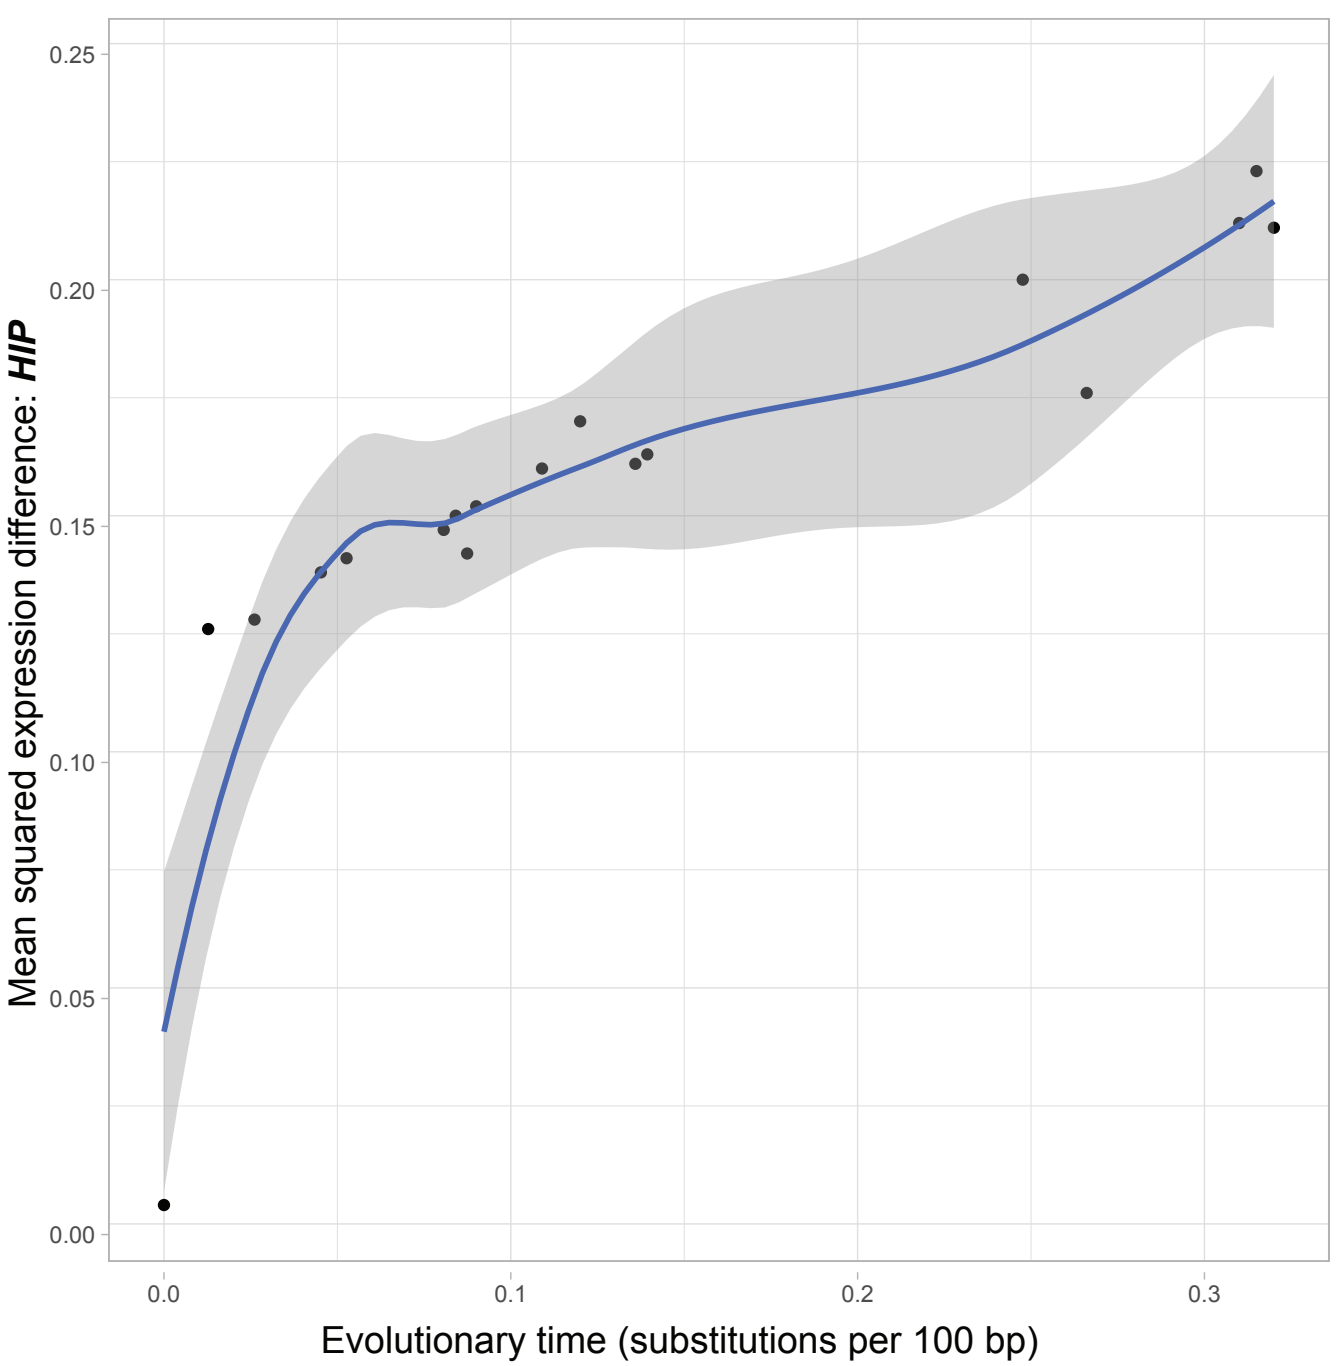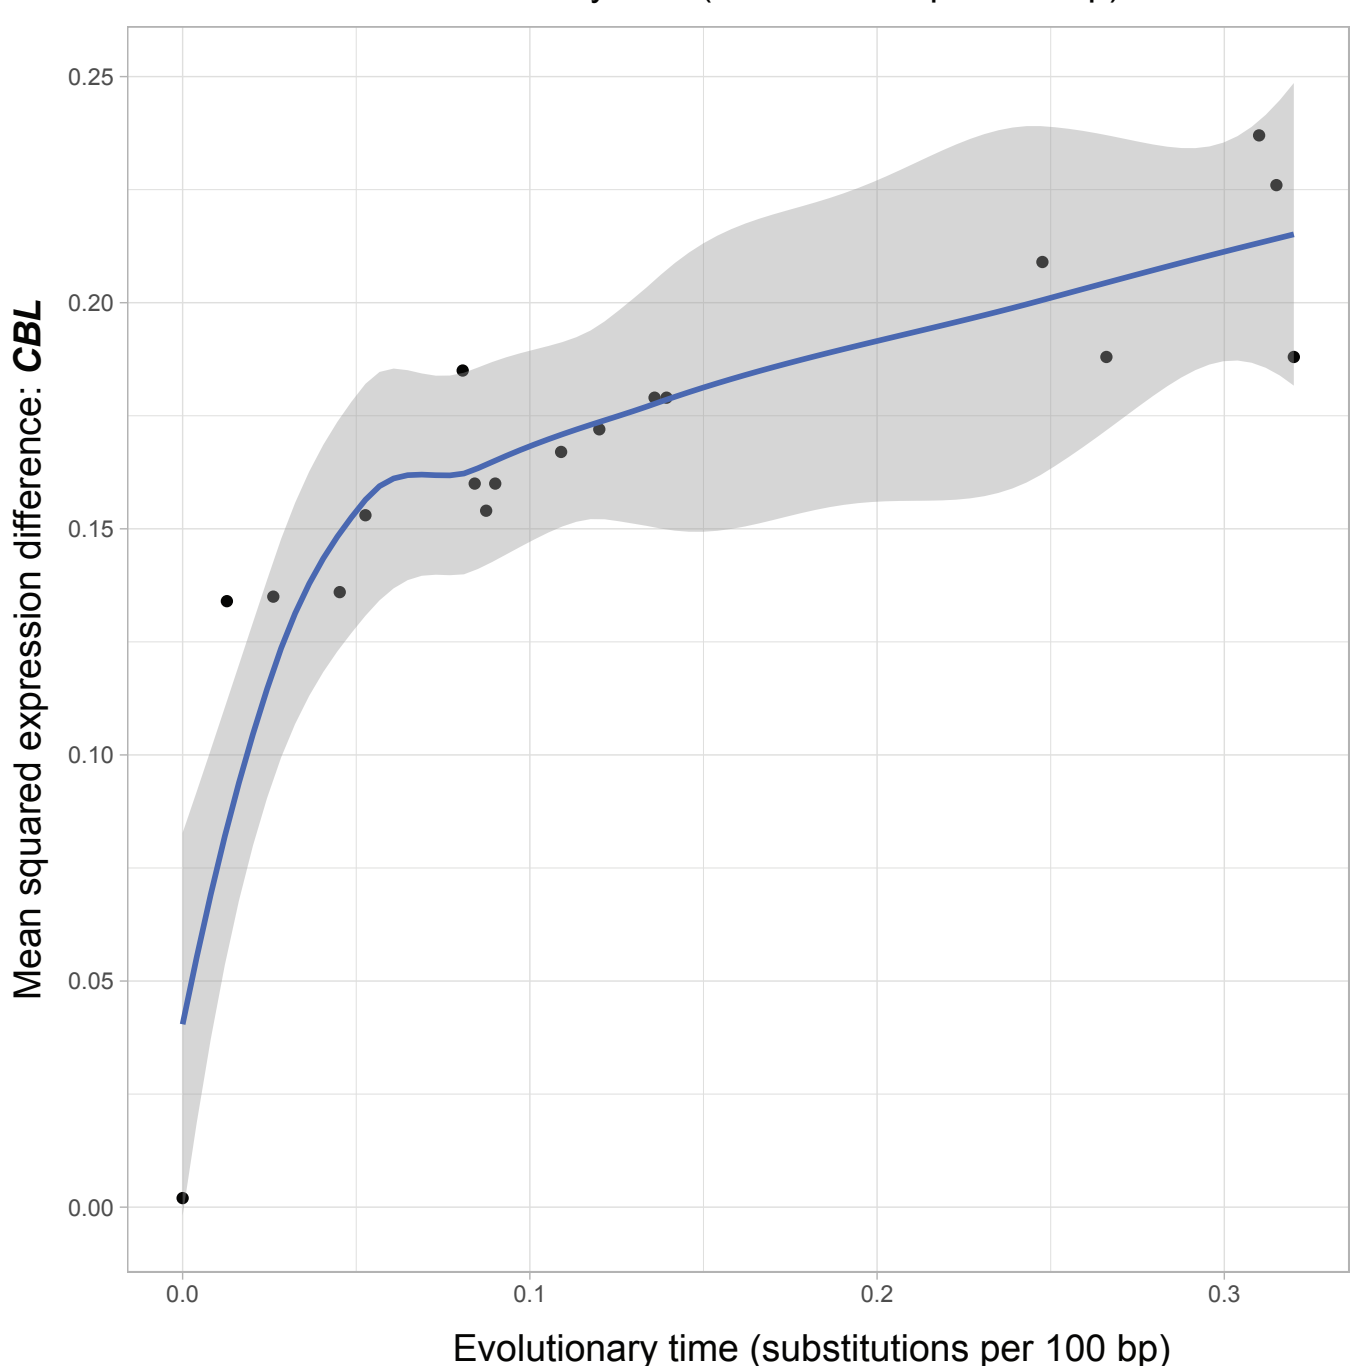

Supplement: supp [file elife-70276-supp-v1.zip]

## Node reproducibility

0.8 ≤ ●  
 0.4 ≤ ● < 0.8  
 0.05 ≤ ● < 0.4

### CBL

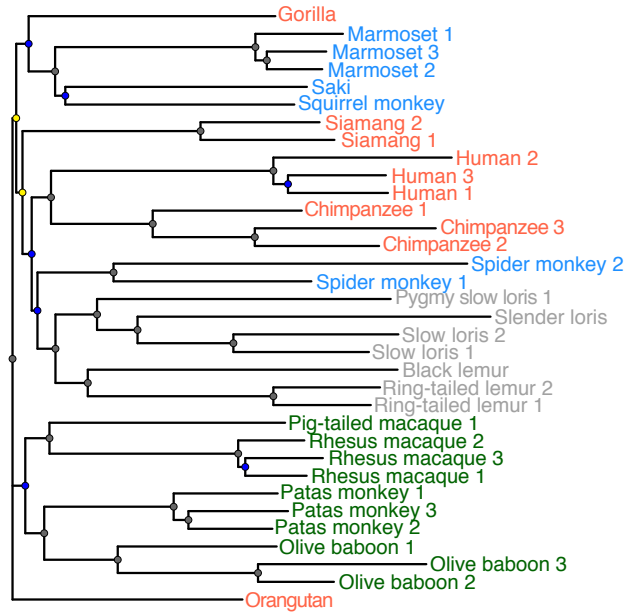

### HIP

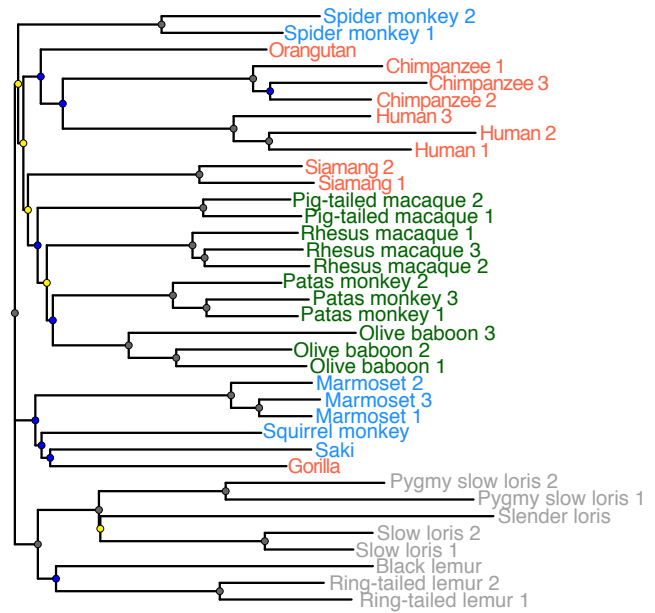

### PFC

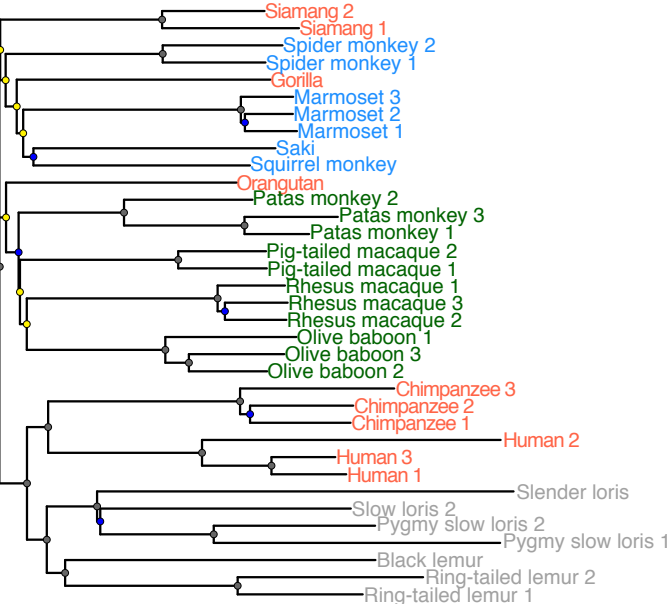

### V1

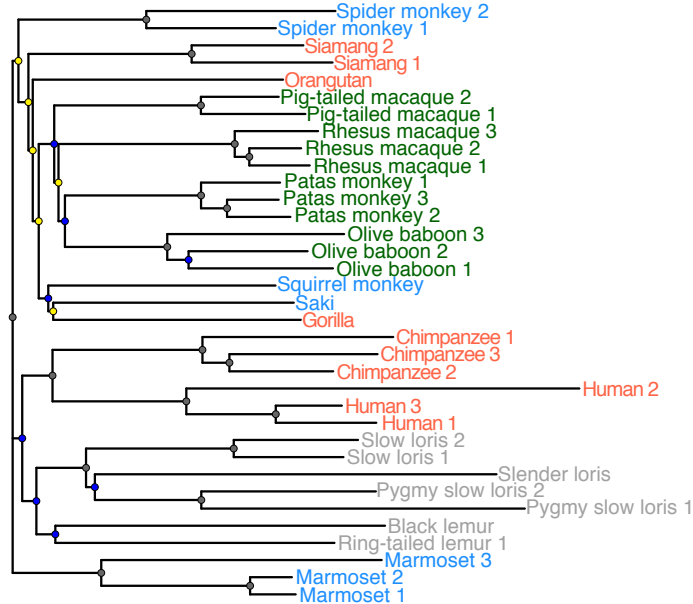

Supplement: supp [file elife-70276-supp-v1.zip]

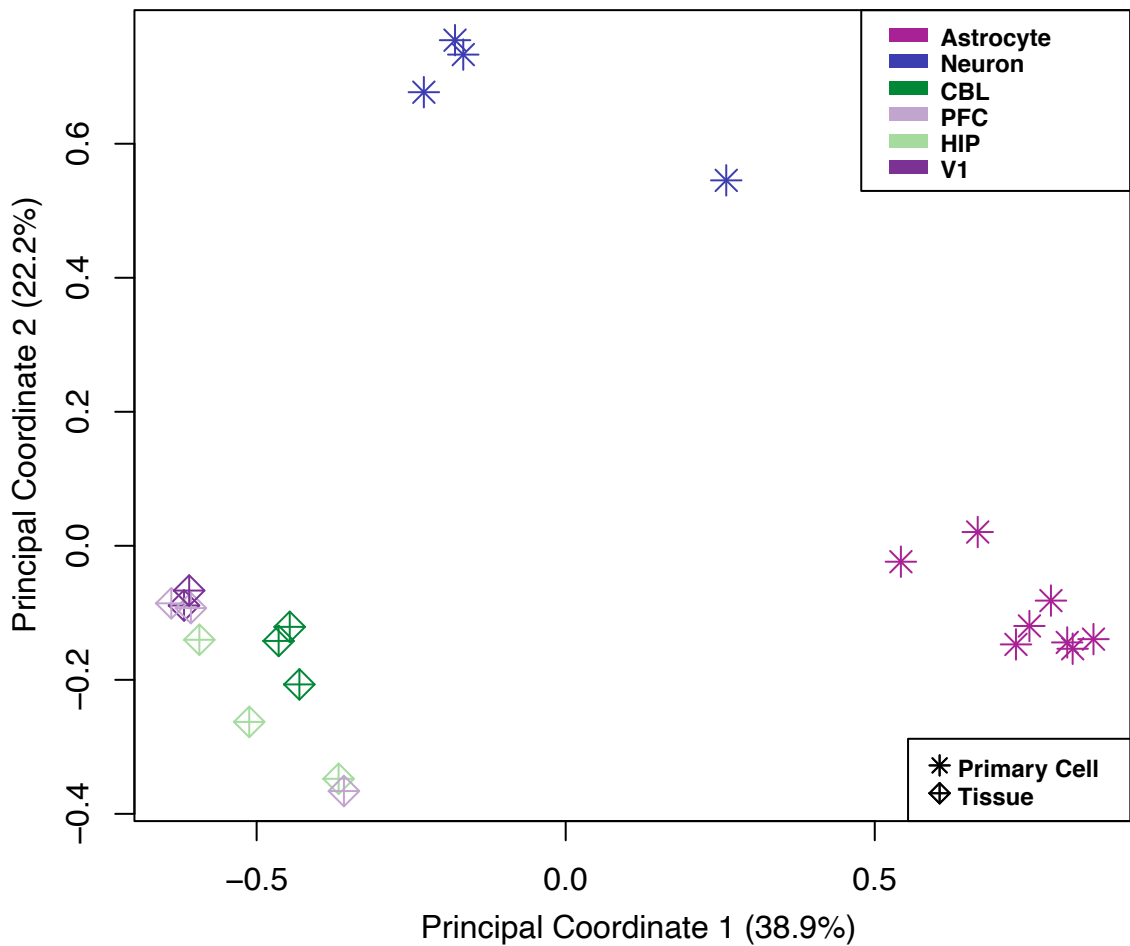

Supplement: supp [file elife-70276-supp-v1.zip]
